# Supplementary material for: Disaster Management Following the Great Kahramanmaraş Earthquakes in 2023, Türkiye
Source: Copernicus journal article supplement (doi:10.5194/egusphere-2024-2538), 2024-10-07
Supplement: Supplementary file 1 [file egusphere-2024-2538-supplement.zip]

| Code System |                    | Memo                                                                                                        | Frequency |
|-------------|--------------------|-------------------------------------------------------------------------------------------------------------|-----------|
| Code System |                    |                                                                                                             | 7146      |
|             | Crisis Management  |                                                                                                             | 0         |
|             | Shelter&meal       |                                                                                                             | 976       |
|             | Evacuation         | 14.02.2024 15:20<br>Lexical Search - ANY: tahliye<br>Within: Document<br>Only in activated documents        | 150       |
|             | Mobile bakery      | 14.02.2024 14:24<br>Lexical Search - ANY: mobil fırın<br>Within: Document<br>Only in activated documents    | 106       |
|             | Mobile kitchen     | 14.02.2024 14:24<br>Lexical Search - ANY: mobil mutfak<br>Within: Document<br>Only in activated documents   | 140       |
|             | Hot meal           | 14.02.2024 14:37<br>Lexical Search - ANY: sıcak yemek<br>Within: Document<br>Only in activated documents    | 84        |
|             | Tent               | 14.02.2024 14:57<br>Lexical Search - ANY: çadır<br>Within: Document<br>Only in activated documents          | 216       |
|             | Container          | 14.02.2024 15:52<br>Lexical Search - ANY: konteyner<br>Within: Document<br>Only in activated documents      | 82        |
|             | Hygiene            | 14.02.2024 15:54<br>Lexical Search - ANY: hijyen<br>Within: Document<br>Only in activated documents         | 4         |
|             | Sheltering         | 14.02.2024 15:56<br>Lexical Search - ANY: barınma<br>Within: Document<br>Only in activated documents        | 166       |
|             | Blanket            | 14.02.2024 16:03<br>Lexical Search - ANY: battaniye<br>Within: Document<br>Only in activated documents      | 28        |
|             | Coordination       |                                                                                                             | 0         |
|             | Social media       | 14.02.2024 11:59<br>Lexical Search - ANY: sosyal medya<br>Within: Document<br>Only in activated documents   | 88        |
|             | Coordination       | 14.02.2024 11:50<br>Lexical Search - ANY: Koordinasyon<br>Within: Document<br>Only in activated documents   | 64        |
|             | Communication      | 14.02.2024 11:50<br>Lexical Search - ANY: iletişim<br>Within: Document<br>Only in activated documents       | 16        |
|             | Cooperation        | 14.02.2024 11:51<br>Lexical Search - ANY: dayanışma<br>Within: Document<br>Only in activated documents      | 24        |
|             | Collaboration      | 14.02.2024 11:52<br>Lexical Search - ANY: iş birliği<br>Within: Document<br>Only in activated documents     | 6         |
|             | Disinformation     | 14.02.2024 14:21<br>Lexical Search - ANY: dezenformasyon<br>Within: Document<br>Only in activated documents | 18        |
|             | Public relations   | 14.02.2024 14:42<br>Lexical Search - ANY: halkla<br>Within: Document<br>Only in activated documents         | 76        |
|             | Resource           | 14.02.2024 15:51<br>Lexical Search - ANY: kaynak<br>Within: Document<br>Only in activated documents         | 12        |
|             | Information        | 14.02.2024 14:52<br>Lexical Search - ANY: bilgi edinme<br>Within: Document<br>Only in activated documents   | 72        |
|             | NGO                | 14.02.2024 15:00<br>Lexical Search - ANY: sivil toplum<br>Within: Document<br>Only in activated documents   | 60        |
|             | Social media usage | 14.02.2024 11:59<br>Lexical Search - ANY: sosyal medya<br>Within: Document<br>Only in activated documents   | 88        |
|             | Recovery           |                                                                                                             | 0         |
|             | Peacemaking        | 14.02.2024 14:49<br>Lexical Search - ANY: arabulucuk<br>Within: Document<br>Only in activated documents     | 72        |

|  |                      |                                                                                                                  |      |
|--|----------------------|------------------------------------------------------------------------------------------------------------------|------|
|  | Fund drive           | 14.02.2024 14:54<br>Lexical Search - ANY: yardım kampanyaları<br>Within: Document<br>Only in activated documents | 72   |
|  | Response             |                                                                                                                  | 0    |
|  | Number of staff      | 14.02.2024 11:56<br>Lexical Search - ANY: personel sayısı<br>Within: Document<br>Only in activated documents     | 120  |
|  | Search&Rescue        | 14.02.2024 11:53<br>Lexical Search - ANY: arama kurtarma<br>Within: Document<br>Only in activated documents      | 282  |
|  | Coast guard&Navy     | 14.02.2024 12:01<br>Lexical Search - ANY: sahil güvenlik<br>Within: Document<br>Only in activated documents      | 250  |
|  | Military             | 14.02.2024 14:32<br>Lexical Search - ANY: jandarma<br>Within: Document<br>Only in activated documents            | 236  |
|  | Psychosocial support | 14.02.2024 14:41<br>Lexical Search - ANY: psikososyal<br>Within: Document<br>Only in activated documents         | 126  |
|  | Welfare service      | 14.02.2024 14:56<br>Lexical Search - ANY: sosyal hizmet<br>Within: Document<br>Only in activated documents       | 104  |
|  | Number               | 14.02.2024 11:56<br>Lexical Search - ANY: personel sayısı<br>Within: Document<br>Only in activated documents     | 120  |
|  | Preparedness         |                                                                                                                  | 72   |
|  | Preparedness         | 14.02.2024 14:43<br>Lexical Search - ANY: afete hazır<br>Within: Document<br>Only in activated documents         | 72   |
|  | AFAD                 | 14.02.2024 14:20<br>Lexical Search - ANY: AFAD<br>Within: Document<br>Only in activated documents                | 1054 |
|  | Kahramanmaraş        | 14.02.2024 11:49<br>Lexical Search - ANY: Kahramanmaraş<br>Within: Document<br>Only in activated documents       | 351  |
|  | Disaster             | 14.02.2024 11:45<br>Lexical Search - ANY: afet<br>Within: Document<br>Only in activated documents                | 1006 |
|  | Emergency            | 14.02.2024 11:45<br>Lexical Search - ANY: acil durum<br>Within: Document<br>Only in activated documents          | 100  |
|  | Risk                 | 14.02.2024 11:44<br>Lexical Search - ANY: risk<br>Within: Document<br>Only in activated documents                | 12   |
|  | Hazard               | 14.02.2024 11:44<br>Lexical Search - ANY: tehlike<br>Within: Document<br>Only in activated documents             | 2    |
|  | Earthquake           | 14.02.2024 11:42<br>Lexical Search - ANY: deprem<br>Within: Document<br>Only in activated documents              | 1316 |
|  | Pazarcık             | 14.02.2024 11:49<br>Lexical Search - ANY: Kahramanmaraş<br>Within: Document<br>Only in activated documents       | 351  |
