# Supplementary material for: Disaster Management Following the Great Kahramanmaraş Earthquakes in 2023, Türkiye
Source: Copernicus journal article supplement (doi:10.5194/egusphere-2024-2538), 2024-10-07
Supplement: Supplementary file 2 [file egusphere-2024-2538-supplement.zip]

| Document name | Code                            | Coder 1 | Coder 2 | Agree | Beginning | End |
|---------------|---------------------------------|---------|---------|-------|-----------|-----|
| AFAD Twitter  | Earthquake                      | 1       | 1       | 1     | 2         | 2   |
| AFAD Twitter  | Earthquake                      | 1       | 1       | 1     | 2         | 2   |
| AFAD Twitter  | Kahramanmaraş                   | 1       | 0       | 0     | 2         | 2   |
| AFAD Twitter  | Pazarcık                        | 0       | 1       | 0     | 2         | 2   |
| AFAD Twitter  | Earthquake                      | 1       | 1       | 1     | 2         | 2   |
| AFAD Twitter  | Earthquake                      | 1       | 1       | 1     | 2         | 2   |
| AFAD Twitter  | Kahramanmaraş                   | 1       | 0       | 0     | 4         | 4   |
| AFAD Twitter  | Pazarcık                        | 0       | 1       | 0     | 4         | 4   |
| AFAD Twitter  | Earthquake                      | 1       | 1       | 1     | 4         | 4   |
| AFAD Twitter  | Earthquake                      | 1       | 1       | 1     | 4         | 4   |
| AFAD Twitter  | Kahramanmaraş                   | 1       | 0       | 0     | 4         | 4   |
| AFAD Twitter  | Pazarcık                        | 0       | 1       | 0     | 4         | 4   |
| AFAD Twitter  | Earthquake                      | 1       | 1       | 1     | 5         | 5   |
| AFAD Twitter  | Earthquake                      | 1       | 1       | 1     | 5         | 5   |
| AFAD Twitter  | Disaster                        | 1       | 1       | 1     | 5         | 5   |
| AFAD Twitter  | Disaster                        | 1       | 1       | 1     | 5         | 5   |
| AFAD Twitter  | AFAD                            | 1       | 1       | 1     | 5         | 5   |
| AFAD Twitter  | AFAD                            | 1       | 1       | 1     | 5         | 5   |
| AFAD Twitter  | Disaster                        | 1       | 1       | 1     | 5         | 5   |
| AFAD Twitter  | Disaster                        | 1       | 1       | 1     | 5         | 5   |
| AFAD Twitter  | AFAD                            | 1       | 1       | 1     | 6         | 6   |
| AFAD Twitter  | AFAD                            | 1       | 1       | 1     | 6         | 6   |
| AFAD Twitter  | Response\Search&Rescue          | 1       | 1       | 1     | 6         | 6   |
| AFAD Twitter  | Response\Search&Rescue          | 1       | 1       | 1     | 6         | 6   |
| AFAD Twitter  | Disaster                        | 1       | 1       | 1     | 7         | 7   |
| AFAD Twitter  | Disaster                        | 1       | 1       | 1     | 7         | 7   |
| AFAD Twitter  | Emergency                       | 1       | 1       | 1     | 7         | 7   |
| AFAD Twitter  | Emergency                       | 1       | 1       | 1     | 7         | 7   |
| AFAD Twitter  | Coordination\Communication      | 1       | 1       | 1     | 7         | 7   |
| AFAD Twitter  | Coordination\Communication      | 1       | 1       | 1     | 7         | 7   |
| AFAD Twitter  | Earthquake                      | 1       | 1       | 1     | 10        | 10  |
| AFAD Twitter  | Earthquake                      | 1       | 1       | 1     | 10        | 10  |
| AFAD Twitter  | Kahramanmaraş                   | 1       | 0       | 0     | 11        | 11  |
| AFAD Twitter  | Pazarcık                        | 0       | 1       | 0     | 11        | 11  |
| AFAD Twitter  | Earthquake                      | 1       | 1       | 1     | 11        | 11  |
| AFAD Twitter  | Earthquake                      | 1       | 1       | 1     | 11        | 11  |
| AFAD Twitter  | Response\Search&Rescue          | 1       | 1       | 1     | 12        | 12  |
| AFAD Twitter  | Response\Search&Rescue          | 1       | 1       | 1     | 12        | 12  |
| AFAD Twitter  | Coordination\Social media       | 1       | 0       | 0     | 13        | 13  |
| AFAD Twitter  | Coordination\Social media usage | 0       | 1       | 0     | 13        | 13  |
| AFAD Twitter  | Coordination\Resource           | 1       | 1       | 1     | 13        | 13  |
| AFAD Twitter  | Coordination\Resource           | 1       | 1       | 1     | 13        | 13  |
| AFAD Twitter  | Kahramanmaraş                   | 1       | 0       | 0     | 14        | 14  |
| AFAD Twitter  | Pazarcık                        | 0       | 1       | 0     | 14        | 14  |
| AFAD Twitter  | Earthquake                      | 1       | 1       | 1     | 14        | 14  |
| AFAD Twitter  | Earthquake                      | 1       | 1       | 1     | 14        | 14  |
| AFAD Twitter  | Kahramanmaraş                   | 1       | 0       | 0     | 15        | 15  |
| AFAD Twitter  | Pazarcık                        | 0       | 1       | 0     | 15        | 15  |
| AFAD Twitter  | AFAD                            | 1       | 1       | 1     | 16        | 16  |
| AFAD Twitter  | AFAD                            | 1       | 1       | 1     | 16        | 16  |
| AFAD Twitter  | Coordination\Coordination       | 1       | 1       | 1     | 18        | 18  |
| AFAD Twitter  | Coordination\Coordination       | 1       | 1       | 1     | 18        | 18  |
| AFAD Twitter  | Kahramanmaraş                   | 1       | 0       | 0     | 18        | 18  |
| AFAD Twitter  | Pazarcık                        | 0       | 1       | 0     | 18        | 18  |
| AFAD Twitter  | Kahramanmaraş                   | 1       | 0       | 0     | 20        | 20  |
| AFAD Twitter  | Pazarcık                        | 0       | 1       | 0     | 20        | 20  |
| AFAD Twitter  | Earthquake                      | 1       | 1       | 1     | 20        | 20  |
| AFAD Twitter  | Earthquake                      | 1       | 1       | 1     | 20        | 20  |
| AFAD Twitter  | Earthquake                      | 1       | 1       | 1     | 21        | 21  |
| AFAD Twitter  | Earthquake                      | 1       | 1       | 1     | 21        | 21  |
| AFAD Twitter  | Response\Search&Rescue          | 1       | 1       | 1     | 22        | 22  |
| AFAD Twitter  | Response\Search&Rescue          | 1       | 1       | 1     | 22        | 22  |
| AFAD Twitter  | Earthquake                      | 1       | 1       | 1     | 23        | 23  |
| AFAD Twitter  | Earthquake                      | 1       | 1       | 1     | 23        | 23  |
| AFAD Twitter  | Earthquake                      | 1       | 1       | 1     | 24        | 24  |
| AFAD Twitter  | Earthquake                      | 1       | 1       | 1     | 24        | 24  |
| AFAD Twitter  | Coordination\Cooperation        | 1       | 1       | 1     | 25        | 25  |
| AFAD Twitter  | Coordination\Cooperation        | 1       | 1       | 1     | 25        | 25  |

|              |                                 |   |   |   |    |    |
|--------------|---------------------------------|---|---|---|----|----|
| AFAD Twitter | Earthquake                      | 1 | 1 | 1 | 26 | 26 |
| AFAD Twitter | Earthquake                      | 1 | 1 | 1 | 26 | 26 |
| AFAD Twitter | Kahramanmaraş                   | 1 | 0 | 0 | 26 | 26 |
| AFAD Twitter | Pazarcık                        | 0 | 1 | 0 | 26 | 26 |
| AFAD Twitter | Earthquake                      | 1 | 1 | 1 | 26 | 26 |
| AFAD Twitter | Earthquake                      | 1 | 1 | 1 | 26 | 26 |
| AFAD Twitter | Earthquake                      | 1 | 1 | 1 | 27 | 27 |
| AFAD Twitter | Earthquake                      | 1 | 1 | 1 | 27 | 27 |
| AFAD Twitter | Earthquake                      | 1 | 1 | 1 | 27 | 27 |
| AFAD Twitter | Earthquake                      | 1 | 1 | 1 | 27 | 27 |
| AFAD Twitter | Kahramanmaraş                   | 1 | 0 | 0 | 28 | 28 |
| AFAD Twitter | Pazarcık                        | 0 | 1 | 0 | 28 | 28 |
| AFAD Twitter | Earthquake                      | 1 | 1 | 1 | 28 | 28 |
| AFAD Twitter | Earthquake                      | 1 | 1 | 1 | 28 | 28 |
| AFAD Twitter | Hazard                          | 1 | 1 | 1 | 28 | 28 |
| AFAD Twitter | Hazard                          | 1 | 1 | 1 | 28 | 28 |
| AFAD Twitter | Kahramanmaraş                   | 1 | 0 | 0 | 29 | 29 |
| AFAD Twitter | Pazarcık                        | 0 | 1 | 0 | 29 | 29 |
| AFAD Twitter | Earthquake                      | 1 | 1 | 1 | 29 | 29 |
| AFAD Twitter | Earthquake                      | 1 | 1 | 1 | 29 | 29 |
| AFAD Twitter | Response\Number of staff        | 1 | 0 | 0 | 29 | 29 |
| AFAD Twitter | Response\Search&Rescue          | 1 | 1 | 1 | 29 | 29 |
| AFAD Twitter | Response\Search&Rescue          | 1 | 1 | 1 | 29 | 29 |
| AFAD Twitter | Response\Number                 | 0 | 1 | 0 | 29 | 29 |
| AFAD Twitter | Kahramanmaraş                   | 1 | 0 | 0 | 30 | 30 |
| AFAD Twitter | Pazarcık                        | 0 | 1 | 0 | 30 | 30 |
| AFAD Twitter | Shelter&meal\Blanket            | 1 | 1 | 1 | 31 | 31 |
| AFAD Twitter | Shelter&meal\Blanket            | 1 | 1 | 1 | 31 | 31 |
| AFAD Twitter | Shelter&meal\Tent               | 1 | 1 | 1 | 31 | 31 |
| AFAD Twitter | Shelter&meal\Tent               | 1 | 1 | 1 | 31 | 31 |
| AFAD Twitter | Shelter&meal\Mobile kitchen     | 1 | 1 | 1 | 31 | 31 |
| AFAD Twitter | Shelter&meal\Mobile kitchen     | 1 | 1 | 1 | 31 | 31 |
| AFAD Twitter | Shelter&meal\Mobile bakery      | 1 | 1 | 1 | 31 | 31 |
| AFAD Twitter | Shelter&meal\Mobile bakery      | 1 | 1 | 1 | 31 | 31 |
| AFAD Twitter | AFAD                            | 1 | 1 | 1 | 32 | 32 |
| AFAD Twitter | AFAD                            | 1 | 1 | 1 | 32 | 32 |
| AFAD Twitter | Earthquake                      | 1 | 1 | 1 | 32 | 32 |
| AFAD Twitter | Earthquake                      | 1 | 1 | 1 | 32 | 32 |
| AFAD Twitter | Coordination\Social media       | 1 | 0 | 0 | 33 | 33 |
| AFAD Twitter | Coordination\Social media usage | 0 | 1 | 0 | 33 | 33 |
| AFAD Twitter | Coordination\Resource           | 1 | 1 | 1 | 33 | 33 |
| AFAD Twitter | Coordination\Resource           | 1 | 1 | 1 | 33 | 33 |
| AFAD Twitter | Earthquake                      | 1 | 1 | 1 | 34 | 34 |
| AFAD Twitter | Earthquake                      | 1 | 1 | 1 | 34 | 34 |
| AFAD Twitter | Response\Search&Rescue          | 1 | 1 | 1 | 34 | 34 |
| AFAD Twitter | Response\Search&Rescue          | 1 | 1 | 1 | 34 | 34 |
| AFAD Twitter | Earthquake                      | 1 | 1 | 1 | 35 | 35 |
| AFAD Twitter | Earthquake                      | 1 | 1 | 1 | 35 | 35 |
| AFAD Twitter | Kahramanmaraş                   | 1 | 0 | 0 | 36 | 36 |
| AFAD Twitter | Pazarcık                        | 0 | 1 | 0 | 36 | 36 |
| AFAD Twitter | Earthquake                      | 1 | 1 | 1 | 36 | 36 |
| AFAD Twitter | Earthquake                      | 1 | 1 | 1 | 36 | 36 |
| AFAD Twitter | Response\Number of staff        | 1 | 0 | 0 | 36 | 36 |
| AFAD Twitter | Response\Search&Rescue          | 1 | 1 | 1 | 36 | 36 |
| AFAD Twitter | Response\Search&Rescue          | 1 | 1 | 1 | 36 | 36 |
| AFAD Twitter | Response\Number                 | 0 | 1 | 0 | 36 | 36 |
| AFAD Twitter | Kahramanmaraş                   | 1 | 0 | 0 | 37 | 37 |
| AFAD Twitter | Pazarcık                        | 0 | 1 | 0 | 37 | 37 |
| AFAD Twitter | Response\Psychosocial support   | 1 | 1 | 1 | 38 | 38 |
| AFAD Twitter | Response\Psychosocial support   | 1 | 1 | 1 | 38 | 38 |
| AFAD Twitter | AFAD                            | 1 | 1 | 1 | 40 | 40 |
| AFAD Twitter | AFAD                            | 1 | 1 | 1 | 40 | 40 |
| AFAD Twitter | Earthquake                      | 1 | 1 | 1 | 40 | 40 |
| AFAD Twitter | Earthquake                      | 1 | 1 | 1 | 40 | 40 |
| AFAD Twitter | Kahramanmaraş                   | 1 | 0 | 0 | 41 | 41 |
| AFAD Twitter | Pazarcık                        | 0 | 1 | 0 | 41 | 41 |
| AFAD Twitter | Earthquake                      | 1 | 1 | 1 | 41 | 41 |
| AFAD Twitter | Earthquake                      | 1 | 1 | 1 | 41 | 41 |
| AFAD Twitter | Response\Number of staff        | 1 | 0 | 0 | 41 | 41 |

|              |                               |   |   |   |    |    |
|--------------|-------------------------------|---|---|---|----|----|
| AFAD Twitter | Response\Search&Rescue        | 1 | 1 | 1 | 41 | 41 |
| AFAD Twitter | Response\Search&Rescue        | 1 | 1 | 1 | 41 | 41 |
| AFAD Twitter | Response\Number               | 0 | 1 | 0 | 41 | 41 |
| AFAD Twitter | Kahramanmaraş                 | 1 | 0 | 0 | 42 | 42 |
| AFAD Twitter | Pazarcık                      | 0 | 1 | 0 | 42 | 42 |
| AFAD Twitter | Shelter&meal\Mobile kitchen   | 1 | 1 | 1 | 43 | 43 |
| AFAD Twitter | Shelter&meal\Mobile kitchen   | 1 | 1 | 1 | 43 | 43 |
| AFAD Twitter | Shelter&meal\Mobile bakery    | 1 | 1 | 1 | 43 | 43 |
| AFAD Twitter | Shelter&meal\Mobile bakery    | 1 | 1 | 1 | 43 | 43 |
| AFAD Twitter | Shelter&meal\Hot meal         | 1 | 1 | 1 | 43 | 43 |
| AFAD Twitter | Shelter&meal\Hot meal         | 1 | 1 | 1 | 43 | 43 |
| AFAD Twitter | AFAD                          | 1 | 1 | 1 | 44 | 44 |
| AFAD Twitter | AFAD                          | 1 | 1 | 1 | 44 | 44 |
| AFAD Twitter | Earthquake                    | 1 | 1 | 1 | 44 | 44 |
| AFAD Twitter | Earthquake                    | 1 | 1 | 1 | 44 | 44 |
| AFAD Twitter | Kahramanmaraş                 | 1 | 0 | 0 | 45 | 45 |
| AFAD Twitter | Pazarcık                      | 0 | 1 | 0 | 45 | 45 |
| AFAD Twitter | Earthquake                    | 1 | 1 | 1 | 45 | 45 |
| AFAD Twitter | Earthquake                    | 1 | 1 | 1 | 45 | 45 |
| AFAD Twitter | Earthquake                    | 1 | 1 | 1 | 45 | 45 |
| AFAD Twitter | Earthquake                    | 1 | 1 | 1 | 45 | 45 |
| AFAD Twitter | Response\Number of staff      | 1 | 0 | 0 | 45 | 45 |
| AFAD Twitter | Response\Search&Rescue        | 1 | 1 | 1 | 45 | 45 |
| AFAD Twitter | Response\Search&Rescue        | 1 | 1 | 1 | 45 | 45 |
| AFAD Twitter | Response\Number               | 0 | 1 | 0 | 45 | 45 |
| AFAD Twitter | Earthquake                    | 1 | 1 | 1 | 46 | 46 |
| AFAD Twitter | Earthquake                    | 1 | 1 | 1 | 46 | 46 |
| AFAD Twitter | Disaster                      | 1 | 1 | 1 | 47 | 47 |
| AFAD Twitter | Disaster                      | 1 | 1 | 1 | 47 | 47 |
| AFAD Twitter | Earthquake                    | 1 | 1 | 1 | 47 | 47 |
| AFAD Twitter | Earthquake                    | 1 | 1 | 1 | 47 | 47 |
| AFAD Twitter | Disaster                      | 1 | 1 | 1 | 47 | 47 |
| AFAD Twitter | Disaster                      | 1 | 1 | 1 | 47 | 47 |
| AFAD Twitter | Response\Military             | 1 | 1 | 1 | 48 | 48 |
| AFAD Twitter | Response\Military             | 1 | 1 | 1 | 48 | 48 |
| AFAD Twitter | Response\Psychosocial support | 1 | 1 | 1 | 50 | 50 |
| AFAD Twitter | Response\Psychosocial support | 1 | 1 | 1 | 50 | 50 |
| AFAD Twitter | Shelter&meal\Mobile kitchen   | 1 | 1 | 1 | 50 | 50 |
| AFAD Twitter | Shelter&meal\Mobile kitchen   | 1 | 1 | 1 | 50 | 50 |
| AFAD Twitter | Shelter&meal\Mobile bakery    | 1 | 1 | 1 | 50 | 50 |
| AFAD Twitter | Shelter&meal\Mobile bakery    | 1 | 1 | 1 | 50 | 50 |
| AFAD Twitter | Shelter&meal\Hot meal         | 1 | 1 | 1 | 50 | 50 |
| AFAD Twitter | Shelter&meal\Hot meal         | 1 | 1 | 1 | 50 | 50 |
| AFAD Twitter | Disaster                      | 1 | 1 | 1 | 51 | 51 |
| AFAD Twitter | Disaster                      | 1 | 1 | 1 | 51 | 51 |
| AFAD Twitter | AFAD                          | 1 | 1 | 1 | 51 | 51 |
| AFAD Twitter | AFAD                          | 1 | 1 | 1 | 51 | 51 |
| AFAD Twitter | Emergency                     | 1 | 1 | 1 | 51 | 51 |
| AFAD Twitter | Emergency                     | 1 | 1 | 1 | 51 | 51 |
| AFAD Twitter | AFAD                          | 1 | 1 | 1 | 52 | 52 |
| AFAD Twitter | AFAD                          | 1 | 1 | 1 | 52 | 52 |
| AFAD Twitter | Earthquake                    | 1 | 1 | 1 | 52 | 52 |
| AFAD Twitter | Earthquake                    | 1 | 1 | 1 | 52 | 52 |
| AFAD Twitter | Earthquake                    | 1 | 1 | 1 | 53 | 53 |
| AFAD Twitter | Earthquake                    | 1 | 1 | 1 | 53 | 53 |
| AFAD Twitter | Coordination\Resource         | 1 | 1 | 1 | 53 | 53 |
| AFAD Twitter | Coordination\Resource         | 1 | 1 | 1 | 53 | 53 |
| AFAD Twitter | Kahramanmaraş                 | 1 | 0 | 0 | 55 | 55 |
| AFAD Twitter | Pazarcık                      | 0 | 1 | 0 | 55 | 55 |
| AFAD Twitter | Earthquake                    | 1 | 1 | 1 | 55 | 55 |
| AFAD Twitter | Earthquake                    | 1 | 1 | 1 | 55 | 55 |
| AFAD Twitter | Response\Number of staff      | 1 | 0 | 0 | 55 | 55 |
| AFAD Twitter | Response\Search&Rescue        | 1 | 1 | 1 | 55 | 55 |
| AFAD Twitter | Response\Search&Rescue        | 1 | 1 | 1 | 55 | 55 |
| AFAD Twitter | Response\Number               | 0 | 1 | 0 | 55 | 55 |
| AFAD Twitter | Earthquake                    | 1 | 1 | 1 | 56 | 56 |
| AFAD Twitter | Earthquake                    | 1 | 1 | 1 | 56 | 56 |
| AFAD Twitter | Response\Military             | 1 | 1 | 1 | 57 | 57 |
| AFAD Twitter | Response\Military             | 1 | 1 | 1 | 57 | 57 |

|              |                               |   |   |   |    |    |
|--------------|-------------------------------|---|---|---|----|----|
| AFAD Twitter | Disaster                      | 1 | 1 | 1 | 58 | 58 |
| AFAD Twitter | Disaster                      | 1 | 1 | 1 | 58 | 58 |
| AFAD Twitter | Response\Psychosocial support | 1 | 1 | 1 | 59 | 59 |
| AFAD Twitter | Response\Psychosocial support | 1 | 1 | 1 | 59 | 59 |
| AFAD Twitter | Response\Welfare service      | 1 | 1 | 1 | 59 | 59 |
| AFAD Twitter | Response\Welfare service      | 1 | 1 | 1 | 59 | 59 |
| AFAD Twitter | Earthquake                    | 1 | 1 | 1 | 59 | 59 |
| AFAD Twitter | Earthquake                    | 1 | 1 | 1 | 59 | 59 |
| AFAD Twitter | Shelter&meal\Hot meal         | 1 | 1 | 1 | 59 | 59 |
| AFAD Twitter | Shelter&meal\Hot meal         | 1 | 1 | 1 | 59 | 59 |
| AFAD Twitter | Shelter&meal\Blanket          | 1 | 1 | 1 | 60 | 60 |
| AFAD Twitter | Shelter&meal\Blanket          | 1 | 1 | 1 | 60 | 60 |
| AFAD Twitter | Shelter&meal\Tent             | 1 | 1 | 1 | 60 | 60 |
| AFAD Twitter | Shelter&meal\Tent             | 1 | 1 | 1 | 60 | 60 |
| AFAD Twitter | Shelter&meal\Container        | 1 | 1 | 1 | 60 | 60 |
| AFAD Twitter | Shelter&meal\Container        | 1 | 1 | 1 | 60 | 60 |
| AFAD Twitter | Shelter&meal\Tent             | 1 | 1 | 1 | 60 | 60 |
| AFAD Twitter | Shelter&meal\Tent             | 1 | 1 | 1 | 60 | 60 |
| AFAD Twitter | AFAD                          | 1 | 1 | 1 | 61 | 61 |
| AFAD Twitter | AFAD                          | 1 | 1 | 1 | 61 | 61 |
| AFAD Twitter | AFAD                          | 1 | 1 | 1 | 61 | 61 |
| AFAD Twitter | Response\Search&Rescue        | 1 | 1 | 1 | 61 | 61 |
| AFAD Twitter | Response\Search&Rescue        | 1 | 1 | 1 | 61 | 61 |
| AFAD Twitter | AFAD                          | 1 | 1 | 1 | 62 | 62 |
| AFAD Twitter | AFAD                          | 1 | 1 | 1 | 62 | 62 |
| AFAD Twitter | AFAD                          | 1 | 1 | 1 | 62 | 62 |
| AFAD Twitter | AFAD                          | 1 | 1 | 1 | 62 | 62 |
| AFAD Twitter | Response\Search&Rescue        | 1 | 1 | 1 | 62 | 62 |
| AFAD Twitter | Response\Search&Rescue        | 1 | 1 | 1 | 62 | 62 |
| AFAD Twitter | Kahramanmaraş                 | 1 | 0 | 0 | 63 | 63 |
| AFAD Twitter | Pazarcık                      | 0 | 1 | 0 | 63 | 63 |
| AFAD Twitter | AFAD                          | 1 | 1 | 1 | 63 | 63 |
| AFAD Twitter | AFAD                          | 1 | 1 | 1 | 63 | 63 |
| AFAD Twitter | AFAD                          | 1 | 1 | 1 | 64 | 64 |
| AFAD Twitter | AFAD                          | 1 | 1 | 1 | 64 | 64 |
| AFAD Twitter | Response\Military             | 1 | 1 | 1 | 65 | 65 |
| AFAD Twitter | Response\Military             | 1 | 1 | 1 | 65 | 65 |
| AFAD Twitter | AFAD                          | 1 | 1 | 1 | 65 | 65 |
| AFAD Twitter | AFAD                          | 1 | 1 | 1 | 65 | 65 |
| AFAD Twitter | AFAD                          | 1 | 1 | 1 | 66 | 66 |
| AFAD Twitter | AFAD                          | 1 | 1 | 1 | 66 | 66 |
| AFAD Twitter | Response\Search&Rescue        | 1 | 1 | 1 | 66 | 66 |
| AFAD Twitter | Response\Search&Rescue        | 1 | 1 | 1 | 66 | 66 |
| AFAD Twitter | AFAD                          | 1 | 1 | 1 | 67 | 67 |
| AFAD Twitter | AFAD                          | 1 | 1 | 1 | 67 | 67 |
| AFAD Twitter | Response\Military             | 1 | 1 | 1 | 68 | 68 |
| AFAD Twitter | Response\Military             | 1 | 1 | 1 | 68 | 68 |
| AFAD Twitter | AFAD                          | 1 | 1 | 1 | 68 | 68 |
| AFAD Twitter | AFAD                          | 1 | 1 | 1 | 68 | 68 |
| AFAD Twitter | Kahramanmaraş                 | 1 | 0 | 0 | 69 | 69 |
| AFAD Twitter | Pazarcık                      | 0 | 1 | 0 | 69 | 69 |
| AFAD Twitter | Earthquake                    | 1 | 1 | 1 | 69 | 69 |
| AFAD Twitter | Earthquake                    | 1 | 1 | 1 | 69 | 69 |
| AFAD Twitter | Earthquake                    | 1 | 1 | 1 | 69 | 69 |
| AFAD Twitter | Earthquake                    | 1 | 1 | 1 | 69 | 69 |
| AFAD Twitter | Earthquake                    | 1 | 1 | 1 | 69 | 69 |
| AFAD Twitter | Earthquake                    | 1 | 1 | 1 | 69 | 69 |
| AFAD Twitter | Disaster                      | 1 | 1 | 1 | 70 | 70 |
| AFAD Twitter | Disaster                      | 1 | 1 | 1 | 70 | 70 |
| AFAD Twitter | Response\Coast guard&Navy     | 1 | 1 | 1 | 71 | 71 |
| AFAD Twitter | Response\Coast guard&Navy     | 1 | 1 | 1 | 71 | 71 |
| AFAD Twitter | Response\Coast guard&Navy     | 1 | 1 | 1 | 71 | 71 |
| AFAD Twitter | Response\Coast guard&Navy     | 1 | 1 | 1 | 71 | 71 |
| AFAD Twitter | Response\Military             | 1 | 1 | 1 | 71 | 71 |
| AFAD Twitter | Response\Military             | 1 | 1 | 1 | 71 | 71 |
| AFAD Twitter | Earthquake                    | 1 | 1 | 1 | 72 | 72 |
| AFAD Twitter | Earthquake                    | 1 | 1 | 1 | 72 | 72 |
| AFAD Twitter | Shelter&meal\Hot meal         | 1 | 1 | 1 | 72 | 72 |

|              |                                 |   |   |   |    |    |
|--------------|---------------------------------|---|---|---|----|----|
| AFAD Twitter | Shelter&meal\Hot meal           | 1 | 1 | 1 | 72 | 72 |
| AFAD Twitter | Response\Psychosocial support   | 1 | 1 | 1 | 72 | 72 |
| AFAD Twitter | Response\Psychosocial support   | 1 | 1 | 1 | 72 | 72 |
| AFAD Twitter | Shelter&meal\Tent               | 1 | 1 | 1 | 73 | 73 |
| AFAD Twitter | Shelter&meal\Tent               | 1 | 1 | 1 | 73 | 73 |
| AFAD Twitter | Shelter&meal\Blanket            | 1 | 1 | 1 | 73 | 73 |
| AFAD Twitter | Shelter&meal\Blanket            | 1 | 1 | 1 | 73 | 73 |
| AFAD Twitter | Earthquake                      | 1 | 1 | 1 | 73 | 73 |
| AFAD Twitter | Earthquake                      | 1 | 1 | 1 | 73 | 73 |
| AFAD Twitter | Earthquake                      | 1 | 1 | 1 | 74 | 74 |
| AFAD Twitter | Earthquake                      | 1 | 1 | 1 | 74 | 74 |
| AFAD Twitter | Coordination\Social media       | 1 | 0 | 0 | 74 | 74 |
| AFAD Twitter | Coordination\Social media usage | 0 | 1 | 0 | 74 | 74 |
| AFAD Twitter | Coordination\Resource           | 1 | 1 | 1 | 74 | 74 |
| AFAD Twitter | Coordination\Resource           | 1 | 1 | 1 | 74 | 74 |
| AFAD Twitter | Coordination\Cooperation        | 1 | 1 | 1 | 76 | 76 |
| AFAD Twitter | Coordination\Cooperation        | 1 | 1 | 1 | 76 | 76 |
| AFAD Twitter | AFAD                            | 1 | 1 | 1 | 76 | 76 |
| AFAD Twitter | AFAD                            | 1 | 1 | 1 | 76 | 76 |
| AFAD Twitter | Kahramanmaraş                   | 1 | 0 | 0 | 77 | 77 |
| AFAD Twitter | Pazarcık                        | 0 | 1 | 0 | 77 | 77 |
| AFAD Twitter | Earthquake                      | 1 | 1 | 1 | 77 | 77 |
| AFAD Twitter | Earthquake                      | 1 | 1 | 1 | 77 | 77 |
| AFAD Twitter | Earthquake                      | 1 | 1 | 1 | 77 | 77 |
| AFAD Twitter | Earthquake                      | 1 | 1 | 1 | 77 | 77 |
| AFAD Twitter | Earthquake                      | 1 | 1 | 1 | 78 | 78 |
| AFAD Twitter | Earthquake                      | 1 | 1 | 1 | 78 | 78 |
| AFAD Twitter | Disaster                        | 1 | 1 | 1 | 80 | 80 |
| AFAD Twitter | Disaster                        | 1 | 1 | 1 | 80 | 80 |
| AFAD Twitter | Response\Coast guard&Navy       | 1 | 1 | 1 | 81 | 81 |
| AFAD Twitter | Response\Coast guard&Navy       | 1 | 1 | 1 | 81 | 81 |
| AFAD Twitter | Response\Coast guard&Navy       | 1 | 1 | 1 | 81 | 81 |
| AFAD Twitter | Response\Coast guard&Navy       | 1 | 1 | 1 | 81 | 81 |
| AFAD Twitter | Response\Military               | 1 | 1 | 1 | 81 | 81 |
| AFAD Twitter | Response\Military               | 1 | 1 | 1 | 81 | 81 |
| AFAD Twitter | Earthquake                      | 1 | 1 | 1 | 82 | 82 |
| AFAD Twitter | Earthquake                      | 1 | 1 | 1 | 82 | 82 |
| AFAD Twitter | Shelter&meal\Hot meal           | 1 | 1 | 1 | 82 | 82 |
| AFAD Twitter | Shelter&meal\Hot meal           | 1 | 1 | 1 | 82 | 82 |
| AFAD Twitter | Shelter&meal\Sheltering         | 1 | 1 | 1 | 83 | 83 |
| AFAD Twitter | Shelter&meal\Sheltering         | 1 | 1 | 1 | 83 | 83 |
| AFAD Twitter | Shelter&meal\Tent               | 1 | 1 | 1 | 83 | 83 |
| AFAD Twitter | Shelter&meal\Tent               | 1 | 1 | 1 | 83 | 83 |
| AFAD Twitter | Shelter&meal\Blanket            | 1 | 1 | 1 | 83 | 83 |
| AFAD Twitter | Shelter&meal\Blanket            | 1 | 1 | 1 | 83 | 83 |
| AFAD Twitter | Earthquake                      | 1 | 1 | 1 | 83 | 83 |
| AFAD Twitter | Earthquake                      | 1 | 1 | 1 | 83 | 83 |
| AFAD Twitter | Coordination\Cooperation        | 1 | 1 | 1 | 84 | 84 |
| AFAD Twitter | Coordination\Cooperation        | 1 | 1 | 1 | 84 | 84 |
| AFAD Twitter | AFAD                            | 1 | 1 | 1 | 84 | 84 |
| AFAD Twitter | AFAD                            | 1 | 1 | 1 | 84 | 84 |
| AFAD Twitter | Kahramanmaraş                   | 1 | 0 | 0 | 85 | 85 |
| AFAD Twitter | Pazarcık                        | 0 | 1 | 0 | 85 | 85 |
| AFAD Twitter | Earthquake                      | 1 | 1 | 1 | 85 | 85 |
| AFAD Twitter | Earthquake                      | 1 | 1 | 1 | 85 | 85 |
| AFAD Twitter | Shelter&meal\Tent               | 1 | 1 | 1 | 85 | 85 |
| AFAD Twitter | Shelter&meal\Tent               | 1 | 1 | 1 | 85 | 85 |
| AFAD Twitter | Earthquake                      | 1 | 1 | 1 | 87 | 87 |
| AFAD Twitter | Earthquake                      | 1 | 1 | 1 | 87 | 87 |
| AFAD Twitter | Response\Search&Rescue          | 1 | 1 | 1 | 87 | 87 |
| AFAD Twitter | Response\Search&Rescue          | 1 | 1 | 1 | 87 | 87 |
| AFAD Twitter | Earthquake                      | 1 | 1 | 1 | 87 | 87 |
| AFAD Twitter | Earthquake                      | 1 | 1 | 1 | 87 | 87 |
| AFAD Twitter | Kahramanmaraş                   | 1 | 0 | 0 | 88 | 88 |
| AFAD Twitter | Pazarcık                        | 0 | 1 | 0 | 88 | 88 |
| AFAD Twitter | Earthquake                      | 1 | 1 | 1 | 88 | 88 |
| AFAD Twitter | Earthquake                      | 1 | 1 | 1 | 88 | 88 |
| AFAD Twitter | Earthquake                      | 1 | 1 | 1 | 88 | 88 |
| AFAD Twitter | Earthquake                      | 1 | 1 | 1 | 88 | 88 |

|              |                               |   |   |   |     |     |
|--------------|-------------------------------|---|---|---|-----|-----|
| AFAD Twitter | Earthquake                    | 1 | 1 | 1 | 89  | 89  |
| AFAD Twitter | Earthquake                    | 1 | 1 | 1 | 89  | 89  |
| AFAD Twitter | Disaster                      | 1 | 1 | 1 | 91  | 91  |
| AFAD Twitter | Disaster                      | 1 | 1 | 1 | 91  | 91  |
| AFAD Twitter | Response\Coast guard&Navy     | 1 | 1 | 1 | 92  | 92  |
| AFAD Twitter | Response\Coast guard&Navy     | 1 | 1 | 1 | 92  | 92  |
| AFAD Twitter | Response\Coast guard&Navy     | 1 | 1 | 1 | 92  | 92  |
| AFAD Twitter | Response\Coast guard&Navy     | 1 | 1 | 1 | 92  | 92  |
| AFAD Twitter | Response\Military             | 1 | 1 | 1 | 92  | 92  |
| AFAD Twitter | Response\Military             | 1 | 1 | 1 | 92  | 92  |
| AFAD Twitter | Earthquake                    | 1 | 1 | 1 | 93  | 93  |
| AFAD Twitter | Earthquake                    | 1 | 1 | 1 | 93  | 93  |
| AFAD Twitter | Shelter&meal\Mobile kitchen   | 1 | 1 | 1 | 93  | 93  |
| AFAD Twitter | Shelter&meal\Mobile kitchen   | 1 | 1 | 1 | 93  | 93  |
| AFAD Twitter | Shelter&meal\Hot meal         | 1 | 1 | 1 | 93  | 93  |
| AFAD Twitter | Shelter&meal\Hot meal         | 1 | 1 | 1 | 93  | 93  |
| AFAD Twitter | Response\Pyschosocial support | 1 | 1 | 1 | 94  | 94  |
| AFAD Twitter | Response\Pyschosocial support | 1 | 1 | 1 | 94  | 94  |
| AFAD Twitter | Shelter&meal\Sheltering       | 1 | 1 | 1 | 95  | 95  |
| AFAD Twitter | Shelter&meal\Sheltering       | 1 | 1 | 1 | 95  | 95  |
| AFAD Twitter | Shelter&meal\Tent             | 1 | 1 | 1 | 95  | 95  |
| AFAD Twitter | Shelter&meal\Tent             | 1 | 1 | 1 | 95  | 95  |
| AFAD Twitter | Shelter&meal\Blanket          | 1 | 1 | 1 | 95  | 95  |
| AFAD Twitter | Shelter&meal\Blanket          | 1 | 1 | 1 | 95  | 95  |
| AFAD Twitter | Earthquake                    | 1 | 1 | 1 | 95  | 95  |
| AFAD Twitter | Earthquake                    | 1 | 1 | 1 | 95  | 95  |
| AFAD Twitter | Coordination\Cooperation      | 1 | 1 | 1 | 96  | 96  |
| AFAD Twitter | Coordination\Cooperation      | 1 | 1 | 1 | 96  | 96  |
| AFAD Twitter | AFAD                          | 1 | 1 | 1 | 97  | 97  |
| AFAD Twitter | AFAD                          | 1 | 1 | 1 | 97  | 97  |
| AFAD Twitter | Earthquake                    | 1 | 1 | 1 | 97  | 97  |
| AFAD Twitter | Earthquake                    | 1 | 1 | 1 | 97  | 97  |
| AFAD Twitter | Earthquake                    | 1 | 1 | 1 | 97  | 97  |
| AFAD Twitter | Earthquake                    | 1 | 1 | 1 | 97  | 97  |
| AFAD Twitter | AFAD                          | 1 | 1 | 1 | 97  | 97  |
| AFAD Twitter | AFAD                          | 1 | 1 | 1 | 97  | 97  |
| AFAD Twitter | AFAD                          | 1 | 1 | 1 | 97  | 97  |
| AFAD Twitter | Kahramanmaraş                 | 1 | 0 | 0 | 98  | 98  |
| AFAD Twitter | Pazarcık                      | 0 | 1 | 0 | 98  | 98  |
| AFAD Twitter | Shelter&meal\Tent             | 1 | 1 | 1 | 98  | 98  |
| AFAD Twitter | Shelter&meal\Tent             | 1 | 1 | 1 | 98  | 98  |
| AFAD Twitter | Coordination\NGO              | 1 | 1 | 1 | 98  | 98  |
| AFAD Twitter | Coordination\NGO              | 1 | 1 | 1 | 98  | 98  |
| AFAD Twitter | Kahramanmaraş                 | 1 | 0 | 0 | 101 | 101 |
| AFAD Twitter | Pazarcık                      | 0 | 1 | 0 | 101 | 101 |
| AFAD Twitter | Earthquake                    | 1 | 1 | 1 | 101 | 101 |
| AFAD Twitter | Earthquake                    | 1 | 1 | 1 | 101 | 101 |
| AFAD Twitter | Earthquake                    | 1 | 1 | 1 | 101 | 101 |
| AFAD Twitter | Earthquake                    | 1 | 1 | 1 | 101 | 101 |
| AFAD Twitter | Earthquake                    | 1 | 1 | 1 | 102 | 102 |
| AFAD Twitter | Earthquake                    | 1 | 1 | 1 | 102 | 102 |
| AFAD Twitter | Disaster                      | 1 | 1 | 1 | 104 | 104 |
| AFAD Twitter | Disaster                      | 1 | 1 | 1 | 104 | 104 |
| AFAD Twitter | Response\Coast guard&Navy     | 1 | 1 | 1 | 105 | 105 |
| AFAD Twitter | Response\Coast guard&Navy     | 1 | 1 | 1 | 105 | 105 |
| AFAD Twitter | Response\Coast guard&Navy     | 1 | 1 | 1 | 105 | 105 |
| AFAD Twitter | Response\Coast guard&Navy     | 1 | 1 | 1 | 105 | 105 |
| AFAD Twitter | Response\Military             | 1 | 1 | 1 | 105 | 105 |
| AFAD Twitter | Response\Military             | 1 | 1 | 1 | 105 | 105 |
| AFAD Twitter | Earthquake                    | 1 | 1 | 1 | 106 | 106 |
| AFAD Twitter | Earthquake                    | 1 | 1 | 1 | 106 | 106 |
| AFAD Twitter | Shelter&meal\Mobile kitchen   | 1 | 1 | 1 | 106 | 106 |
| AFAD Twitter | Shelter&meal\Mobile kitchen   | 1 | 1 | 1 | 106 | 106 |
| AFAD Twitter | Shelter&meal\Hot meal         | 1 | 1 | 1 | 106 | 106 |
| AFAD Twitter | Shelter&meal\Hot meal         | 1 | 1 | 1 | 106 | 106 |
| AFAD Twitter | Response\Pyschosocial support | 1 | 1 | 1 | 107 | 107 |
| AFAD Twitter | Response\Pyschosocial support | 1 | 1 | 1 | 107 | 107 |
| AFAD Twitter | Shelter&meal\Sheltering       | 1 | 1 | 1 | 108 | 108 |

|              |                                 |   |   |   |     |     |
|--------------|---------------------------------|---|---|---|-----|-----|
| AFAD Twitter | Shelter&meal\Sheltering         | 1 | 1 | 1 | 108 | 108 |
| AFAD Twitter | Shelter&meal\Tent               | 1 | 1 | 1 | 108 | 108 |
| AFAD Twitter | Shelter&meal\Tent               | 1 | 1 | 1 | 108 | 108 |
| AFAD Twitter | Shelter&meal\Blanket            | 1 | 1 | 1 | 108 | 108 |
| AFAD Twitter | Shelter&meal\Blanket            | 1 | 1 | 1 | 108 | 108 |
| AFAD Twitter | Earthquake                      | 1 | 1 | 1 | 108 | 108 |
| AFAD Twitter | Earthquake                      | 1 | 1 | 1 | 108 | 108 |
| AFAD Twitter | Earthquake                      | 1 | 1 | 1 | 109 | 109 |
| AFAD Twitter | Earthquake                      | 1 | 1 | 1 | 109 | 109 |
| AFAD Twitter | Response\Search&Rescue          | 1 | 1 | 1 | 109 | 109 |
| AFAD Twitter | Response\Search&Rescue          | 1 | 1 | 1 | 109 | 109 |
| AFAD Twitter | Earthquake                      | 1 | 1 | 1 | 109 | 109 |
| AFAD Twitter | Earthquake                      | 1 | 1 | 1 | 109 | 109 |
| AFAD Twitter | Response\Search&Rescue          | 1 | 1 | 1 | 110 | 110 |
| AFAD Twitter | Response\Search&Rescue          | 1 | 1 | 1 | 110 | 110 |
| AFAD Twitter | Response\Search&Rescue          | 1 | 1 | 1 | 110 | 110 |
| AFAD Twitter | Response\Search&Rescue          | 1 | 1 | 1 | 110 | 110 |
| AFAD Twitter | Disaster                        | 1 | 1 | 1 | 111 | 111 |
| AFAD Twitter | Disaster                        | 1 | 1 | 1 | 111 | 111 |
| AFAD Twitter | Shelter&meal\Evacuation         | 1 | 1 | 1 | 111 | 111 |
| AFAD Twitter | Shelter&meal\Evacuation         | 1 | 1 | 1 | 111 | 111 |
| AFAD Twitter | AFAD                            | 1 | 1 | 1 | 111 | 111 |
| AFAD Twitter | AFAD                            | 1 | 1 | 1 | 111 | 111 |
| AFAD Twitter | Coordination\Coordination       | 1 | 1 | 1 | 111 | 111 |
| AFAD Twitter | Coordination\Coordination       | 1 | 1 | 1 | 111 | 111 |
| AFAD Twitter | Response\Military               | 1 | 1 | 1 | 111 | 111 |
| AFAD Twitter | Response\Military               | 1 | 1 | 1 | 111 | 111 |
| AFAD Twitter | Shelter&meal\Evacuation         | 1 | 1 | 1 | 112 | 112 |
| AFAD Twitter | Shelter&meal\Evacuation         | 1 | 1 | 1 | 112 | 112 |
| AFAD Twitter | Shelter&meal\Evacuation         | 1 | 1 | 1 | 112 | 112 |
| AFAD Twitter | Shelter&meal\Evacuation         | 1 | 1 | 1 | 112 | 112 |
| AFAD Twitter | Shelter&meal\Evacuation         | 1 | 1 | 1 | 112 | 112 |
| AFAD Twitter | Shelter&meal\Evacuation         | 1 | 1 | 1 | 112 | 112 |
| AFAD Twitter | Response\Search&Rescue          | 1 | 1 | 1 | 113 | 113 |
| AFAD Twitter | Response\Search&Rescue          | 1 | 1 | 1 | 113 | 113 |
| AFAD Twitter | Response\Search&Rescue          | 1 | 1 | 1 | 113 | 113 |
| AFAD Twitter | Response\Search&Rescue          | 1 | 1 | 1 | 113 | 113 |
| AFAD Twitter | Disaster                        | 1 | 1 | 1 | 114 | 114 |
| AFAD Twitter | Disaster                        | 1 | 1 | 1 | 114 | 114 |
| AFAD Twitter | Earthquake                      | 1 | 1 | 1 | 115 | 115 |
| AFAD Twitter | Earthquake                      | 1 | 1 | 1 | 115 | 115 |
| AFAD Twitter | Coordination\Social media       | 1 | 0 | 0 | 115 | 115 |
| AFAD Twitter | Coordination\Social media usage | 0 | 1 | 0 | 115 | 115 |
| AFAD Twitter | Shelter&meal\Tent               | 1 | 1 | 1 | 116 | 116 |
| AFAD Twitter | Shelter&meal\Tent               | 1 | 1 | 1 | 116 | 116 |
| AFAD Twitter | Coordination\NGO                | 1 | 1 | 1 | 116 | 116 |
| AFAD Twitter | Coordination\NGO                | 1 | 1 | 1 | 116 | 116 |
| AFAD Twitter | AFAD                            | 1 | 1 | 1 | 117 | 117 |
| AFAD Twitter | AFAD                            | 1 | 1 | 1 | 117 | 117 |
| AFAD Twitter | Kahramanmaraş                   | 1 | 0 | 0 | 119 | 119 |
| AFAD Twitter | Pazarcık                        | 0 | 1 | 0 | 119 | 119 |
| AFAD Twitter | Earthquake                      | 1 | 1 | 1 | 119 | 119 |
| AFAD Twitter | Earthquake                      | 1 | 1 | 1 | 119 | 119 |
| AFAD Twitter | Earthquake                      | 1 | 1 | 1 | 119 | 119 |
| AFAD Twitter | Earthquake                      | 1 | 1 | 1 | 119 | 119 |
| AFAD Twitter | Earthquake                      | 1 | 1 | 1 | 120 | 120 |
| AFAD Twitter | Earthquake                      | 1 | 1 | 1 | 120 | 120 |
| AFAD Twitter | Earthquake                      | 1 | 1 | 1 | 122 | 122 |
| AFAD Twitter | Earthquake                      | 1 | 1 | 1 | 122 | 122 |
| AFAD Twitter | Shelter&meal\Evacuation         | 1 | 1 | 1 | 122 | 122 |
| AFAD Twitter | Shelter&meal\Evacuation         | 1 | 1 | 1 | 122 | 122 |
| AFAD Twitter | Disaster                        | 1 | 1 | 1 | 123 | 123 |
| AFAD Twitter | Disaster                        | 1 | 1 | 1 | 123 | 123 |
| AFAD Twitter | Response\Coast guard&Navy       | 1 | 1 | 1 | 124 | 124 |
| AFAD Twitter | Response\Coast guard&Navy       | 1 | 1 | 1 | 124 | 124 |
| AFAD Twitter | Response\Coast guard&Navy       | 1 | 1 | 1 | 124 | 124 |
| AFAD Twitter | Response\Coast guard&Navy       | 1 | 1 | 1 | 124 | 124 |
| AFAD Twitter | Response\Military               | 1 | 1 | 1 | 124 | 124 |
| AFAD Twitter | Response\Military               | 1 | 1 | 1 | 124 | 124 |

|              |                               |   |   |   |     |     |
|--------------|-------------------------------|---|---|---|-----|-----|
| AFAD Twitter | Earthquake                    | 1 | 1 | 1 | 125 | 125 |
| AFAD Twitter | Earthquake                    | 1 | 1 | 1 | 125 | 125 |
| AFAD Twitter | Shelter&meal\Mobile kitchen   | 1 | 1 | 1 | 125 | 125 |
| AFAD Twitter | Shelter&meal\Mobile kitchen   | 1 | 1 | 1 | 125 | 125 |
| AFAD Twitter | Shelter&meal\Hot meal         | 1 | 1 | 1 | 125 | 125 |
| AFAD Twitter | Shelter&meal\Hot meal         | 1 | 1 | 1 | 125 | 125 |
| AFAD Twitter | Response\Psychosocial support | 1 | 1 | 1 | 126 | 126 |
| AFAD Twitter | Response\Psychosocial support | 1 | 1 | 1 | 126 | 126 |
| AFAD Twitter | Shelter&meal\Sheltering       | 1 | 1 | 1 | 127 | 127 |
| AFAD Twitter | Shelter&meal\Sheltering       | 1 | 1 | 1 | 127 | 127 |
| AFAD Twitter | Shelter&meal\Tent             | 1 | 1 | 1 | 127 | 127 |
| AFAD Twitter | Shelter&meal\Tent             | 1 | 1 | 1 | 127 | 127 |
| AFAD Twitter | Shelter&meal\Blanket          | 1 | 1 | 1 | 127 | 127 |
| AFAD Twitter | Shelter&meal\Blanket          | 1 | 1 | 1 | 127 | 127 |
| AFAD Twitter | Earthquake                    | 1 | 1 | 1 | 127 | 127 |
| AFAD Twitter | Earthquake                    | 1 | 1 | 1 | 127 | 127 |
| AFAD Twitter | Kahramanmaraş                 | 1 | 0 | 0 | 129 | 129 |
| AFAD Twitter | Pazarcık                      | 0 | 1 | 0 | 129 | 129 |
| AFAD Twitter | Earthquake                    | 1 | 1 | 1 | 129 | 129 |
| AFAD Twitter | Earthquake                    | 1 | 1 | 1 | 129 | 129 |
| AFAD Twitter | Earthquake                    | 1 | 1 | 1 | 129 | 129 |
| AFAD Twitter | Earthquake                    | 1 | 1 | 1 | 129 | 129 |
| AFAD Twitter | Earthquake                    | 1 | 1 | 1 | 130 | 130 |
| AFAD Twitter | Earthquake                    | 1 | 1 | 1 | 130 | 130 |
| AFAD Twitter | Earthquake                    | 1 | 1 | 1 | 132 | 132 |
| AFAD Twitter | Earthquake                    | 1 | 1 | 1 | 132 | 132 |
| AFAD Twitter | Shelter&meal\Evacuation       | 1 | 1 | 1 | 132 | 132 |
| AFAD Twitter | Shelter&meal\Evacuation       | 1 | 1 | 1 | 132 | 132 |
| AFAD Twitter | Disaster                      | 1 | 1 | 1 | 133 | 133 |
| AFAD Twitter | Disaster                      | 1 | 1 | 1 | 133 | 133 |
| AFAD Twitter | Response\Coast guard&Navy     | 1 | 1 | 1 | 134 | 134 |
| AFAD Twitter | Response\Coast guard&Navy     | 1 | 1 | 1 | 134 | 134 |
| AFAD Twitter | Response\Coast guard&Navy     | 1 | 1 | 1 | 134 | 134 |
| AFAD Twitter | Response\Coast guard&Navy     | 1 | 1 | 1 | 134 | 134 |
| AFAD Twitter | Response\Military             | 1 | 1 | 1 | 134 | 134 |
| AFAD Twitter | Response\Military             | 1 | 1 | 1 | 134 | 134 |
| AFAD Twitter | Earthquake                    | 1 | 1 | 1 | 135 | 135 |
| AFAD Twitter | Earthquake                    | 1 | 1 | 1 | 135 | 135 |
| AFAD Twitter | Shelter&meal\Mobile kitchen   | 1 | 1 | 1 | 135 | 135 |
| AFAD Twitter | Shelter&meal\Mobile kitchen   | 1 | 1 | 1 | 135 | 135 |
| AFAD Twitter | Shelter&meal\Hot meal         | 1 | 1 | 1 | 135 | 135 |
| AFAD Twitter | Shelter&meal\Hot meal         | 1 | 1 | 1 | 135 | 135 |
| AFAD Twitter | Response\Psychosocial support | 1 | 1 | 1 | 136 | 136 |
| AFAD Twitter | Response\Psychosocial support | 1 | 1 | 1 | 136 | 136 |
| AFAD Twitter | Shelter&meal\Sheltering       | 1 | 1 | 1 | 137 | 137 |
| AFAD Twitter | Shelter&meal\Sheltering       | 1 | 1 | 1 | 137 | 137 |
| AFAD Twitter | Shelter&meal\Tent             | 1 | 1 | 1 | 137 | 137 |
| AFAD Twitter | Shelter&meal\Tent             | 1 | 1 | 1 | 137 | 137 |
| AFAD Twitter | Shelter&meal\Blanket          | 1 | 1 | 1 | 137 | 137 |
| AFAD Twitter | Shelter&meal\Blanket          | 1 | 1 | 1 | 137 | 137 |
| AFAD Twitter | Earthquake                    | 1 | 1 | 1 | 137 | 137 |
| AFAD Twitter | Earthquake                    | 1 | 1 | 1 | 137 | 137 |
| AFAD Twitter | Disaster                      | 1 | 1 | 1 | 138 | 138 |
| AFAD Twitter | Disaster                      | 1 | 1 | 1 | 138 | 138 |
| AFAD Twitter | Shelter&meal\Evacuation       | 1 | 1 | 1 | 138 | 138 |
| AFAD Twitter | Shelter&meal\Evacuation       | 1 | 1 | 1 | 138 | 138 |
| AFAD Twitter | AFAD                          | 1 | 1 | 1 | 138 | 138 |
| AFAD Twitter | AFAD                          | 1 | 1 | 1 | 138 | 138 |
| AFAD Twitter | Coordination\Coordination     | 1 | 1 | 1 | 138 | 138 |
| AFAD Twitter | Coordination\Coordination     | 1 | 1 | 1 | 138 | 138 |
| AFAD Twitter | Response\Military             | 1 | 1 | 1 | 139 | 139 |
| AFAD Twitter | Response\Military             | 1 | 1 | 1 | 139 | 139 |
| AFAD Twitter | Shelter&meal\Evacuation       | 1 | 1 | 1 | 140 | 140 |
| AFAD Twitter | Shelter&meal\Evacuation       | 1 | 1 | 1 | 140 | 140 |
| AFAD Twitter | Shelter&meal\Evacuation       | 1 | 1 | 1 | 140 | 140 |
| AFAD Twitter | Shelter&meal\Evacuation       | 1 | 1 | 1 | 140 | 140 |
| AFAD Twitter | Shelter&meal\Evacuation       | 1 | 1 | 1 | 141 | 141 |
| AFAD Twitter | Shelter&meal\Evacuation       | 1 | 1 | 1 | 141 | 141 |
| AFAD Twitter | Coordination\Social media     | 1 | 0 | 0 | 143 | 143 |



|              |                                 |   |   |   |     |     |
|--------------|---------------------------------|---|---|---|-----|-----|
| AFAD Twitter | Coordination\Social media usage | 0 | 1 | 0 | 143 | 143 |
| AFAD Twitter | AFAD                            | 1 | 1 | 1 | 143 | 143 |
| AFAD Twitter | AFAD                            | 1 | 1 | 1 | 143 | 143 |
| AFAD Twitter | Response\Search&Rescue          | 1 | 1 | 1 | 143 | 143 |
| AFAD Twitter | Response\Search&Rescue          | 1 | 1 | 1 | 143 | 143 |
| AFAD Twitter | Coordination\Disinformation     | 1 | 1 | 1 | 143 | 143 |
| AFAD Twitter | Coordination\Disinformation     | 1 | 1 | 1 | 143 | 143 |
| AFAD Twitter | Disaster                        | 1 | 1 | 1 | 146 | 146 |
| AFAD Twitter | Disaster                        | 1 | 1 | 1 | 146 | 146 |
| AFAD Twitter | Shelter&meal\Evacuation         | 1 | 1 | 1 | 146 | 146 |
| AFAD Twitter | Shelter&meal\Evacuation         | 1 | 1 | 1 | 146 | 146 |
| AFAD Twitter | AFAD                            | 1 | 1 | 1 | 146 | 146 |
| AFAD Twitter | AFAD                            | 1 | 1 | 1 | 146 | 146 |
| AFAD Twitter | Coordination\Coordination       | 1 | 1 | 1 | 146 | 146 |
| AFAD Twitter | Coordination\Coordination       | 1 | 1 | 1 | 146 | 146 |
| AFAD Twitter | Response\Military               | 1 | 1 | 1 | 147 | 147 |
| AFAD Twitter | Response\Military               | 1 | 1 | 1 | 147 | 147 |
| AFAD Twitter | Shelter&meal\Evacuation         | 1 | 1 | 1 | 148 | 148 |
| AFAD Twitter | Shelter&meal\Evacuation         | 1 | 1 | 1 | 148 | 148 |
| AFAD Twitter | Shelter&meal\Evacuation         | 1 | 1 | 1 | 148 | 148 |
| AFAD Twitter | Shelter&meal\Evacuation         | 1 | 1 | 1 | 148 | 148 |
| AFAD Twitter | Shelter&meal\Evacuation         | 1 | 1 | 1 | 148 | 148 |
| AFAD Twitter | Earthquake                      | 1 | 1 | 1 | 149 | 149 |
| AFAD Twitter | Earthquake                      | 1 | 1 | 1 | 149 | 149 |
| AFAD Twitter | Kahramanmaraş                   | 1 | 0 | 0 | 150 | 150 |
| AFAD Twitter | Pazarcık                        | 0 | 1 | 0 | 150 | 150 |
| AFAD Twitter | Earthquake                      | 1 | 1 | 1 | 150 | 150 |
| AFAD Twitter | Earthquake                      | 1 | 1 | 1 | 150 | 150 |
| AFAD Twitter | Earthquake                      | 1 | 1 | 1 | 150 | 150 |
| AFAD Twitter | Earthquake                      | 1 | 1 | 1 | 150 | 150 |
| AFAD Twitter | Earthquake                      | 1 | 1 | 1 | 151 | 151 |
| AFAD Twitter | Earthquake                      | 1 | 1 | 1 | 151 | 151 |
| AFAD Twitter | Earthquake                      | 1 | 1 | 1 | 153 | 153 |
| AFAD Twitter | Earthquake                      | 1 | 1 | 1 | 153 | 153 |
| AFAD Twitter | Shelter&meal\Evacuation         | 1 | 1 | 1 | 153 | 153 |
| AFAD Twitter | Shelter&meal\Evacuation         | 1 | 1 | 1 | 153 | 153 |
| AFAD Twitter | Disaster                        | 1 | 1 | 1 | 154 | 154 |
| AFAD Twitter | Disaster                        | 1 | 1 | 1 | 154 | 154 |
| AFAD Twitter | Response\Coast guard&Navy       | 1 | 1 | 1 | 155 | 155 |
| AFAD Twitter | Response\Coast guard&Navy       | 1 | 1 | 1 | 155 | 155 |
| AFAD Twitter | Response\Coast guard&Navy       | 1 | 1 | 1 | 155 | 155 |
| AFAD Twitter | Response\Coast guard&Navy       | 1 | 1 | 1 | 155 | 155 |
| AFAD Twitter | Response\Military               | 1 | 1 | 1 | 155 | 155 |
| AFAD Twitter | Response\Military               | 1 | 1 | 1 | 155 | 155 |
| AFAD Twitter | Earthquake                      | 1 | 1 | 1 | 156 | 156 |
| AFAD Twitter | Earthquake                      | 1 | 1 | 1 | 156 | 156 |
| AFAD Twitter | Shelter&meal\Mobile kitchen     | 1 | 1 | 1 | 156 | 156 |
| AFAD Twitter | Shelter&meal\Mobile kitchen     | 1 | 1 | 1 | 156 | 156 |
| AFAD Twitter | Shelter&meal\Mobile bakery      | 1 | 1 | 1 | 156 | 156 |
| AFAD Twitter | Shelter&meal\Mobile bakery      | 1 | 1 | 1 | 156 | 156 |
| AFAD Twitter | Shelter&meal\Hot meal           | 1 | 1 | 1 | 156 | 156 |
| AFAD Twitter | Shelter&meal\Hot meal           | 1 | 1 | 1 | 156 | 156 |
| AFAD Twitter | Response\Psychosocial support   | 1 | 1 | 1 | 157 | 157 |
| AFAD Twitter | Response\Psychosocial support   | 1 | 1 | 1 | 157 | 157 |
| AFAD Twitter | Shelter&meal\Sheltering         | 1 | 1 | 1 | 158 | 158 |
| AFAD Twitter | Shelter&meal\Sheltering         | 1 | 1 | 1 | 158 | 158 |
| AFAD Twitter | Shelter&meal\Tent               | 1 | 1 | 1 | 158 | 158 |
| AFAD Twitter | Shelter&meal\Tent               | 1 | 1 | 1 | 158 | 158 |
| AFAD Twitter | Shelter&meal\Blanket            | 1 | 1 | 1 | 158 | 158 |
| AFAD Twitter | Shelter&meal\Blanket            | 1 | 1 | 1 | 158 | 158 |
| AFAD Twitter | Earthquake                      | 1 | 1 | 1 | 158 | 158 |
| AFAD Twitter | Earthquake                      | 1 | 1 | 1 | 158 | 158 |
| AFAD Twitter | Kahramanmaraş                   | 1 | 0 | 0 | 159 | 159 |
| AFAD Twitter | Pazarcık                        | 0 | 1 | 0 | 159 | 159 |
| AFAD Twitter | Earthquake                      | 1 | 1 | 1 | 159 | 159 |
| AFAD Twitter | Earthquake                      | 1 | 1 | 1 | 159 | 159 |
| AFAD Twitter | Earthquake                      | 1 | 1 | 1 | 159 | 159 |
| AFAD Twitter | Earthquake                      | 1 | 1 | 1 | 159 | 159 |

|              |                                 |   |   |   |     |     |
|--------------|---------------------------------|---|---|---|-----|-----|
| AFAD Twitter | Earthquake                      | 1 | 1 | 1 | 160 | 160 |
| AFAD Twitter | Earthquake                      | 1 | 1 | 1 | 160 | 160 |
| AFAD Twitter | Earthquake                      | 1 | 1 | 1 | 162 | 162 |
| AFAD Twitter | Earthquake                      | 1 | 1 | 1 | 162 | 162 |
| AFAD Twitter | Shelter&meal\Evacuation         | 1 | 1 | 1 | 162 | 162 |
| AFAD Twitter | Shelter&meal\Evacuation         | 1 | 1 | 1 | 162 | 162 |
| AFAD Twitter | Disaster                        | 1 | 1 | 1 | 163 | 163 |
| AFAD Twitter | Disaster                        | 1 | 1 | 1 | 163 | 163 |
| AFAD Twitter | Response\Coast guard&Navy       | 1 | 1 | 1 | 164 | 164 |
| AFAD Twitter | Response\Coast guard&Navy       | 1 | 1 | 1 | 164 | 164 |
| AFAD Twitter | Response\Coast guard&Navy       | 1 | 1 | 1 | 164 | 164 |
| AFAD Twitter | Response\Coast guard&Navy       | 1 | 1 | 1 | 164 | 164 |
| AFAD Twitter | Response\Military               | 1 | 1 | 1 | 164 | 164 |
| AFAD Twitter | Response\Military               | 1 | 1 | 1 | 164 | 164 |
| AFAD Twitter | Earthquake                      | 1 | 1 | 1 | 165 | 165 |
| AFAD Twitter | Earthquake                      | 1 | 1 | 1 | 165 | 165 |
| AFAD Twitter | Shelter&meal\Mobile kitchen     | 1 | 1 | 1 | 165 | 165 |
| AFAD Twitter | Shelter&meal\Mobile kitchen     | 1 | 1 | 1 | 165 | 165 |
| AFAD Twitter | Shelter&meal\Mobile bakery      | 1 | 1 | 1 | 165 | 165 |
| AFAD Twitter | Shelter&meal\Mobile bakery      | 1 | 1 | 1 | 165 | 165 |
| AFAD Twitter | Shelter&meal\Hot meal           | 1 | 1 | 1 | 165 | 165 |
| AFAD Twitter | Shelter&meal\Hot meal           | 1 | 1 | 1 | 165 | 165 |
| AFAD Twitter | Response\Psychosocial support   | 1 | 1 | 1 | 166 | 166 |
| AFAD Twitter | Response\Psychosocial support   | 1 | 1 | 1 | 166 | 166 |
| AFAD Twitter | Earthquake                      | 1 | 1 | 1 | 166 | 166 |
| AFAD Twitter | Earthquake                      | 1 | 1 | 1 | 166 | 166 |
| AFAD Twitter | Earthquake                      | 1 | 1 | 1 | 166 | 166 |
| AFAD Twitter | Earthquake                      | 1 | 1 | 1 | 166 | 166 |
| AFAD Twitter | Response\Psychosocial support   | 1 | 1 | 1 | 166 | 166 |
| AFAD Twitter | Response\Psychosocial support   | 1 | 1 | 1 | 166 | 166 |
| AFAD Twitter | Shelter&meal\Sheltering         | 1 | 1 | 1 | 167 | 167 |
| AFAD Twitter | Shelter&meal\Sheltering         | 1 | 1 | 1 | 167 | 167 |
| AFAD Twitter | Shelter&meal\Tent               | 1 | 1 | 1 | 167 | 167 |
| AFAD Twitter | Shelter&meal\Tent               | 1 | 1 | 1 | 167 | 167 |
| AFAD Twitter | Shelter&meal\Blanket            | 1 | 1 | 1 | 167 | 167 |
| AFAD Twitter | Shelter&meal\Blanket            | 1 | 1 | 1 | 167 | 167 |
| AFAD Twitter | Earthquake                      | 1 | 1 | 1 | 167 | 167 |
| AFAD Twitter | Earthquake                      | 1 | 1 | 1 | 167 | 167 |
| AFAD Twitter | Coordination\Social media       | 1 | 0 | 0 | 168 | 168 |
| AFAD Twitter | Coordination\Social media usage | 0 | 1 | 0 | 168 | 168 |
| AFAD Twitter | Disaster                        | 1 | 1 | 1 | 168 | 168 |
| AFAD Twitter | Disaster                        | 1 | 1 | 1 | 168 | 168 |
| AFAD Twitter | AFAD                            | 1 | 1 | 1 | 168 | 168 |
| AFAD Twitter | AFAD                            | 1 | 1 | 1 | 168 | 168 |
| AFAD Twitter | Coordination\NGO                | 1 | 1 | 1 | 169 | 169 |
| AFAD Twitter | Coordination\NGO                | 1 | 1 | 1 | 169 | 169 |
| AFAD Twitter | Kahramanmaraş                   | 1 | 0 | 0 | 171 | 171 |
| AFAD Twitter | Pazarcık                        | 0 | 1 | 0 | 171 | 171 |
| AFAD Twitter | Earthquake                      | 1 | 1 | 1 | 171 | 171 |
| AFAD Twitter | Earthquake                      | 1 | 1 | 1 | 171 | 171 |
| AFAD Twitter | Earthquake                      | 1 | 1 | 1 | 171 | 171 |
| AFAD Twitter | Earthquake                      | 1 | 1 | 1 | 171 | 171 |
| AFAD Twitter | Earthquake                      | 1 | 1 | 1 | 172 | 172 |
| AFAD Twitter | Earthquake                      | 1 | 1 | 1 | 172 | 172 |
| AFAD Twitter | Earthquake                      | 1 | 1 | 1 | 172 | 172 |
| AFAD Twitter | Earthquake                      | 1 | 1 | 1 | 174 | 174 |
| AFAD Twitter | Earthquake                      | 1 | 1 | 1 | 174 | 174 |
| AFAD Twitter | Shelter&meal\Evacuation         | 1 | 1 | 1 | 174 | 174 |
| AFAD Twitter | Shelter&meal\Evacuation         | 1 | 1 | 1 | 174 | 174 |
| AFAD Twitter | Disaster                        | 1 | 1 | 1 | 175 | 175 |
| AFAD Twitter | Disaster                        | 1 | 1 | 1 | 175 | 175 |
| AFAD Twitter | Response\Coast guard&Navy       | 1 | 1 | 1 | 176 | 176 |
| AFAD Twitter | Response\Coast guard&Navy       | 1 | 1 | 1 | 176 | 176 |
| AFAD Twitter | Response\Coast guard&Navy       | 1 | 1 | 1 | 176 | 176 |
| AFAD Twitter | Response\Coast guard&Navy       | 1 | 1 | 1 | 176 | 176 |
| AFAD Twitter | Response\Military               | 1 | 1 | 1 | 176 | 176 |
| AFAD Twitter | Response\Military               | 1 | 1 | 1 | 176 | 176 |
| AFAD Twitter | Earthquake                      | 1 | 1 | 1 | 177 | 177 |
| AFAD Twitter | Earthquake                      | 1 | 1 | 1 | 177 | 177 |
| AFAD Twitter | Shelter&meal\Mobile kitchen     | 1 | 1 | 1 | 177 | 177 |

|              |                               |   |   |   |     |     |
|--------------|-------------------------------|---|---|---|-----|-----|
| AFAD Twitter | Shelter&meal\Mobile kitchen   | 1 | 1 | 1 | 177 | 177 |
| AFAD Twitter | Shelter&meal\Mobile bakery    | 1 | 1 | 1 | 177 | 177 |
| AFAD Twitter | Shelter&meal\Mobile bakery    | 1 | 1 | 1 | 177 | 177 |
| AFAD Twitter | Shelter&meal\Hot meal         | 1 | 1 | 1 | 177 | 177 |
| AFAD Twitter | Shelter&meal\Hot meal         | 1 | 1 | 1 | 177 | 177 |
| AFAD Twitter | Response\Psychosocial support | 1 | 1 | 1 | 178 | 178 |
| AFAD Twitter | Response\Psychosocial support | 1 | 1 | 1 | 178 | 178 |
| AFAD Twitter | Earthquake                    | 1 | 1 | 1 | 178 | 178 |
| AFAD Twitter | Earthquake                    | 1 | 1 | 1 | 178 | 178 |
| AFAD Twitter | Earthquake                    | 1 | 1 | 1 | 178 | 178 |
| AFAD Twitter | Earthquake                    | 1 | 1 | 1 | 178 | 178 |
| AFAD Twitter | Response\Psychosocial support | 1 | 1 | 1 | 178 | 178 |
| AFAD Twitter | Response\Psychosocial support | 1 | 1 | 1 | 178 | 178 |
| AFAD Twitter | Shelter&meal\Sheltering       | 1 | 1 | 1 | 179 | 179 |
| AFAD Twitter | Shelter&meal\Sheltering       | 1 | 1 | 1 | 179 | 179 |
| AFAD Twitter | Shelter&meal\Tent             | 1 | 1 | 1 | 179 | 179 |
| AFAD Twitter | Shelter&meal\Tent             | 1 | 1 | 1 | 179 | 179 |
| AFAD Twitter | Shelter&meal\Blanket          | 1 | 1 | 1 | 179 | 179 |
| AFAD Twitter | Shelter&meal\Blanket          | 1 | 1 | 1 | 179 | 179 |
| AFAD Twitter | Earthquake                    | 1 | 1 | 1 | 179 | 179 |
| AFAD Twitter | Earthquake                    | 1 | 1 | 1 | 179 | 179 |
| AFAD Twitter | AFAD                          | 1 | 1 | 1 | 180 | 180 |
| AFAD Twitter | AFAD                          | 1 | 1 | 1 | 180 | 180 |
| AFAD Twitter | Response\Military             | 1 | 1 | 1 | 181 | 181 |
| AFAD Twitter | Response\Military             | 1 | 1 | 1 | 181 | 181 |
| AFAD Twitter | Earthquake                    | 1 | 1 | 1 | 182 | 182 |
| AFAD Twitter | Earthquake                    | 1 | 1 | 1 | 182 | 182 |
| AFAD Twitter | Earthquake                    | 1 | 1 | 1 | 183 | 183 |
| AFAD Twitter | Earthquake                    | 1 | 1 | 1 | 183 | 183 |
| AFAD Twitter | Disaster                      | 1 | 1 | 1 | 184 | 184 |
| AFAD Twitter | Disaster                      | 1 | 1 | 1 | 184 | 184 |
| AFAD Twitter | Response\Military             | 1 | 1 | 1 | 186 | 186 |
| AFAD Twitter | Response\Military             | 1 | 1 | 1 | 186 | 186 |
| AFAD Twitter | Response\Coast guard&Navy     | 1 | 1 | 1 | 188 | 188 |
| AFAD Twitter | Response\Coast guard&Navy     | 1 | 1 | 1 | 188 | 188 |
| AFAD Twitter | Earthquake                    | 1 | 1 | 1 | 192 | 192 |
| AFAD Twitter | Earthquake                    | 1 | 1 | 1 | 192 | 192 |
| AFAD Twitter | Coordination\Cooperation      | 1 | 1 | 1 | 192 | 192 |
| AFAD Twitter | Coordination\Cooperation      | 1 | 1 | 1 | 192 | 192 |
| AFAD Twitter | AFAD                          | 1 | 1 | 1 | 192 | 192 |
| AFAD Twitter | AFAD                          | 1 | 1 | 1 | 192 | 192 |
| AFAD Twitter | AFAD                          | 1 | 1 | 1 | 193 | 193 |
| AFAD Twitter | AFAD                          | 1 | 1 | 1 | 193 | 193 |
| AFAD Twitter | Coordination\Coordination     | 1 | 1 | 1 | 193 | 193 |
| AFAD Twitter | Coordination\Coordination     | 1 | 1 | 1 | 193 | 193 |
| AFAD Twitter | Response\Military             | 1 | 1 | 1 | 194 | 194 |
| AFAD Twitter | Response\Military             | 1 | 1 | 1 | 194 | 194 |
| AFAD Twitter | Coordination\Collaboration    | 1 | 1 | 1 | 194 | 194 |
| AFAD Twitter | Coordination\Collaboration    | 1 | 1 | 1 | 194 | 194 |
| AFAD Twitter | Earthquake                    | 1 | 1 | 1 | 194 | 194 |
| AFAD Twitter | Earthquake                    | 1 | 1 | 1 | 194 | 194 |
| AFAD Twitter | Disaster                      | 1 | 1 | 1 | 194 | 194 |
| AFAD Twitter | Disaster                      | 1 | 1 | 1 | 194 | 194 |
| AFAD Twitter | Shelter&meal\Evacuation       | 1 | 1 | 1 | 194 | 194 |
| AFAD Twitter | Shelter&meal\Evacuation       | 1 | 1 | 1 | 194 | 194 |
| AFAD Twitter | Shelter&meal\Evacuation       | 1 | 1 | 1 | 194 | 194 |
| AFAD Twitter | Shelter&meal\Evacuation       | 1 | 1 | 1 | 194 | 194 |
| AFAD Twitter | Coordination\Cooperation      | 1 | 1 | 1 | 195 | 195 |
| AFAD Twitter | Coordination\Cooperation      | 1 | 1 | 1 | 195 | 195 |
| AFAD Twitter | Earthquake                    | 1 | 1 | 1 | 196 | 196 |
| AFAD Twitter | Earthquake                    | 1 | 1 | 1 | 196 | 196 |
| AFAD Twitter | Shelter&meal\Tent             | 1 | 1 | 1 | 196 | 196 |
| AFAD Twitter | Shelter&meal\Tent             | 1 | 1 | 1 | 196 | 196 |
| AFAD Twitter | Kahramanmaraş                 | 1 | 0 | 0 | 197 | 197 |
| AFAD Twitter | Pazarcık                      | 0 | 1 | 0 | 197 | 197 |
| AFAD Twitter | Earthquake                    | 1 | 1 | 1 | 197 | 197 |
| AFAD Twitter | Earthquake                    | 1 | 1 | 1 | 197 | 197 |
| AFAD Twitter | Earthquake                    | 1 | 1 | 1 | 197 | 197 |
| AFAD Twitter | Earthquake                    | 1 | 1 | 1 | 197 | 197 |

|              |                               |   |   |   |     |     |
|--------------|-------------------------------|---|---|---|-----|-----|
| AFAD Twitter | Earthquake                    | 1 | 1 | 1 | 198 | 198 |
| AFAD Twitter | Earthquake                    | 1 | 1 | 1 | 198 | 198 |
| AFAD Twitter | Earthquake                    | 1 | 1 | 1 | 199 | 199 |
| AFAD Twitter | Earthquake                    | 1 | 1 | 1 | 199 | 199 |
| AFAD Twitter | Shelter&meal\Evacuation       | 1 | 1 | 1 | 199 | 199 |
| AFAD Twitter | Shelter&meal\Evacuation       | 1 | 1 | 1 | 199 | 199 |
| AFAD Twitter | Disaster                      | 1 | 1 | 1 | 200 | 200 |
| AFAD Twitter | Disaster                      | 1 | 1 | 1 | 200 | 200 |
| AFAD Twitter | Earthquake                    | 1 | 1 | 1 | 202 | 202 |
| AFAD Twitter | Earthquake                    | 1 | 1 | 1 | 202 | 202 |
| AFAD Twitter | Shelter&meal\Mobile kitchen   | 1 | 1 | 1 | 202 | 202 |
| AFAD Twitter | Shelter&meal\Mobile kitchen   | 1 | 1 | 1 | 202 | 202 |
| AFAD Twitter | Shelter&meal\Mobile bakery    | 1 | 1 | 1 | 202 | 202 |
| AFAD Twitter | Shelter&meal\Mobile bakery    | 1 | 1 | 1 | 202 | 202 |
| AFAD Twitter | Shelter&meal\Hot meal         | 1 | 1 | 1 | 203 | 203 |
| AFAD Twitter | Shelter&meal\Hot meal         | 1 | 1 | 1 | 203 | 203 |
| AFAD Twitter | Response\Psychosocial support | 1 | 1 | 1 | 204 | 204 |
| AFAD Twitter | Response\Psychosocial support | 1 | 1 | 1 | 204 | 204 |
| AFAD Twitter | Shelter&meal\Tent             | 1 | 1 | 1 | 205 | 205 |
| AFAD Twitter | Shelter&meal\Tent             | 1 | 1 | 1 | 205 | 205 |
| AFAD Twitter | Shelter&meal\Blanket          | 1 | 1 | 1 | 205 | 205 |
| AFAD Twitter | Shelter&meal\Blanket          | 1 | 1 | 1 | 205 | 205 |
| AFAD Twitter | Earthquake                    | 1 | 1 | 1 | 205 | 205 |
| AFAD Twitter | Earthquake                    | 1 | 1 | 1 | 205 | 205 |
| AFAD Twitter | Earthquake                    | 1 | 1 | 1 | 207 | 207 |
| AFAD Twitter | Earthquake                    | 1 | 1 | 1 | 207 | 207 |
| AFAD Twitter | Shelter&meal\Tent             | 1 | 1 | 1 | 207 | 207 |
| AFAD Twitter | Shelter&meal\Tent             | 1 | 1 | 1 | 207 | 207 |
| AFAD Twitter | AFAD                          | 1 | 1 | 1 | 209 | 209 |
| AFAD Twitter | AFAD                          | 1 | 1 | 1 | 209 | 209 |
| AFAD Twitter | Earthquake                    | 1 | 1 | 1 | 209 | 209 |
| AFAD Twitter | Earthquake                    | 1 | 1 | 1 | 209 | 209 |
| AFAD Twitter | Coordination\NGO              | 1 | 1 | 1 | 210 | 210 |
| AFAD Twitter | Coordination\NGO              | 1 | 1 | 1 | 210 | 210 |
| AFAD Twitter | Shelter&meal\Tent             | 1 | 1 | 1 | 210 | 210 |
| AFAD Twitter | Shelter&meal\Tent             | 1 | 1 | 1 | 210 | 210 |
| AFAD Twitter | Kahramanmaraş                 | 1 | 0 | 0 | 211 | 211 |
| AFAD Twitter | Pazarcık                      | 0 | 1 | 0 | 211 | 211 |
| AFAD Twitter | AFAD                          | 1 | 1 | 1 | 211 | 211 |
| AFAD Twitter | AFAD                          | 1 | 1 | 1 | 211 | 211 |
| AFAD Twitter | Coordination\Coordination     | 1 | 1 | 1 | 211 | 211 |
| AFAD Twitter | Coordination\Coordination     | 1 | 1 | 1 | 211 | 211 |
| AFAD Twitter | Response\Military             | 1 | 1 | 1 | 212 | 212 |
| AFAD Twitter | Response\Military             | 1 | 1 | 1 | 212 | 212 |
| AFAD Twitter | Coordination\Collaboration    | 1 | 1 | 1 | 212 | 212 |
| AFAD Twitter | Coordination\Collaboration    | 1 | 1 | 1 | 212 | 212 |
| AFAD Twitter | Earthquake                    | 1 | 1 | 1 | 212 | 212 |
| AFAD Twitter | Earthquake                    | 1 | 1 | 1 | 212 | 212 |
| AFAD Twitter | Shelter&meal\Tent             | 1 | 1 | 1 | 212 | 212 |
| AFAD Twitter | Shelter&meal\Tent             | 1 | 1 | 1 | 212 | 212 |
| AFAD Twitter | Kahramanmaraş                 | 1 | 0 | 0 | 213 | 213 |
| AFAD Twitter | Pazarcık                      | 0 | 1 | 0 | 213 | 213 |
| AFAD Twitter | Earthquake                    | 1 | 1 | 1 | 213 | 213 |
| AFAD Twitter | Earthquake                    | 1 | 1 | 1 | 213 | 213 |
| AFAD Twitter | Earthquake                    | 1 | 1 | 1 | 213 | 213 |
| AFAD Twitter | Earthquake                    | 1 | 1 | 1 | 213 | 213 |
| AFAD Twitter | Earthquake                    | 1 | 1 | 1 | 214 | 214 |
| AFAD Twitter | Earthquake                    | 1 | 1 | 1 | 214 | 214 |
| AFAD Twitter | Earthquake                    | 1 | 1 | 1 | 216 | 216 |
| AFAD Twitter | Earthquake                    | 1 | 1 | 1 | 216 | 216 |
| AFAD Twitter | Shelter&meal\Evacuation       | 1 | 1 | 1 | 216 | 216 |
| AFAD Twitter | Shelter&meal\Evacuation       | 1 | 1 | 1 | 216 | 216 |
| AFAD Twitter | Disaster                      | 1 | 1 | 1 | 217 | 217 |
| AFAD Twitter | Disaster                      | 1 | 1 | 1 | 217 | 217 |
| AFAD Twitter | Earthquake                    | 1 | 1 | 1 | 219 | 219 |
| AFAD Twitter | Earthquake                    | 1 | 1 | 1 | 219 | 219 |
| AFAD Twitter | Shelter&meal\Mobile kitchen   | 1 | 1 | 1 | 219 | 219 |
| AFAD Twitter | Shelter&meal\Mobile kitchen   | 1 | 1 | 1 | 219 | 219 |
| AFAD Twitter | Shelter&meal\Mobile bakery    | 1 | 1 | 1 | 219 | 219 |

[illegible]

|              |                               |   |   |   |     |     |
|--------------|-------------------------------|---|---|---|-----|-----|
| AFAD Twitter | Earthquake                    | 1 | 1 | 1 | 234 | 234 |
| AFAD Twitter | Earthquake                    | 1 | 1 | 1 | 234 | 234 |
| AFAD Twitter | Shelter&meal\Evacuation       | 1 | 1 | 1 | 234 | 234 |
| AFAD Twitter | Shelter&meal\Evacuation       | 1 | 1 | 1 | 234 | 234 |
| AFAD Twitter | Earthquake                    | 1 | 1 | 1 | 235 | 235 |
| AFAD Twitter | Earthquake                    | 1 | 1 | 1 | 235 | 235 |
| AFAD Twitter | Shelter&meal\Mobile kitchen   | 1 | 1 | 1 | 235 | 235 |
| AFAD Twitter | Shelter&meal\Mobile kitchen   | 1 | 1 | 1 | 235 | 235 |
| AFAD Twitter | Shelter&meal\Mobile bakery    | 1 | 1 | 1 | 235 | 235 |
| AFAD Twitter | Shelter&meal\Mobile bakery    | 1 | 1 | 1 | 235 | 235 |
| AFAD Twitter | Shelter&meal\Hot meal         | 1 | 1 | 1 | 235 | 235 |
| AFAD Twitter | Shelter&meal\Hot meal         | 1 | 1 | 1 | 235 | 235 |
| AFAD Twitter | Earthquake                    | 1 | 1 | 1 | 236 | 236 |
| AFAD Twitter | Earthquake                    | 1 | 1 | 1 | 236 | 236 |
| AFAD Twitter | Shelter&meal\Tent             | 1 | 1 | 1 | 236 | 236 |
| AFAD Twitter | Shelter&meal\Tent             | 1 | 1 | 1 | 236 | 236 |
| AFAD Twitter | Shelter&meal\Blanket          | 1 | 1 | 1 | 236 | 236 |
| AFAD Twitter | Shelter&meal\Blanket          | 1 | 1 | 1 | 236 | 236 |
| AFAD Twitter | Response\Psychosocial support | 1 | 1 | 1 | 236 | 236 |
| AFAD Twitter | Response\Psychosocial support | 1 | 1 | 1 | 236 | 236 |
| AFAD Twitter | AFAD                          | 1 | 1 | 1 | 237 | 237 |
| AFAD Twitter | AFAD                          | 1 | 1 | 1 | 237 | 237 |
| AFAD Twitter | Earthquake                    | 1 | 1 | 1 | 237 | 237 |
| AFAD Twitter | Earthquake                    | 1 | 1 | 1 | 237 | 237 |
| AFAD Twitter | Kahramanmaraş                 | 1 | 0 | 0 | 239 | 239 |
| AFAD Twitter | Pazarcık                      | 0 | 1 | 0 | 239 | 239 |
| AFAD Twitter | Earthquake                    | 1 | 1 | 1 | 239 | 239 |
| AFAD Twitter | Earthquake                    | 1 | 1 | 1 | 239 | 239 |
| AFAD Twitter | AFAD                          | 1 | 1 | 1 | 239 | 239 |
| AFAD Twitter | AFAD                          | 1 | 1 | 1 | 239 | 239 |
| AFAD Twitter | Earthquake                    | 1 | 1 | 1 | 239 | 239 |
| AFAD Twitter | Earthquake                    | 1 | 1 | 1 | 239 | 239 |
| AFAD Twitter | Earthquake                    | 1 | 1 | 1 | 240 | 240 |
| AFAD Twitter | Earthquake                    | 1 | 1 | 1 | 240 | 240 |
| AFAD Twitter | Shelter&meal\Sheltering       | 1 | 1 | 1 | 240 | 240 |
| AFAD Twitter | Shelter&meal\Sheltering       | 1 | 1 | 1 | 240 | 240 |
| AFAD Twitter | Shelter&meal\Tent             | 1 | 1 | 1 | 240 | 240 |
| AFAD Twitter | Shelter&meal\Tent             | 1 | 1 | 1 | 240 | 240 |
| AFAD Twitter | Coordination\Coordination     | 1 | 1 | 1 | 242 | 242 |
| AFAD Twitter | Coordination\Coordination     | 1 | 1 | 1 | 242 | 242 |
| AFAD Twitter | Earthquake                    | 1 | 1 | 1 | 243 | 243 |
| AFAD Twitter | Earthquake                    | 1 | 1 | 1 | 243 | 243 |
| AFAD Twitter | Shelter&meal\Sheltering       | 1 | 1 | 1 | 243 | 243 |
| AFAD Twitter | Shelter&meal\Sheltering       | 1 | 1 | 1 | 243 | 243 |
| AFAD Twitter | Shelter&meal\Tent             | 1 | 1 | 1 | 243 | 243 |
| AFAD Twitter | Shelter&meal\Tent             | 1 | 1 | 1 | 243 | 243 |
| AFAD Twitter | Shelter&meal\Container        | 1 | 1 | 1 | 243 | 243 |
| AFAD Twitter | Shelter&meal\Container        | 1 | 1 | 1 | 243 | 243 |
| AFAD Twitter | Shelter&meal\Tent             | 1 | 1 | 1 | 244 | 244 |
| AFAD Twitter | Shelter&meal\Tent             | 1 | 1 | 1 | 244 | 244 |
| AFAD Twitter | Shelter&meal\Blanket          | 1 | 1 | 1 | 244 | 244 |
| AFAD Twitter | Shelter&meal\Blanket          | 1 | 1 | 1 | 244 | 244 |
| AFAD Twitter | Shelter&meal\Hygiene          | 1 | 1 | 1 | 244 | 244 |
| AFAD Twitter | Shelter&meal\Hygiene          | 1 | 1 | 1 | 244 | 244 |
| AFAD Twitter | Earthquake                    | 1 | 1 | 1 | 244 | 244 |
| AFAD Twitter | Earthquake                    | 1 | 1 | 1 | 244 | 244 |
| AFAD Twitter | Coordination\Coordination     | 1 | 1 | 1 | 245 | 245 |
| AFAD Twitter | Coordination\Coordination     | 1 | 1 | 1 | 245 | 245 |
| AFAD Twitter | Kahramanmaraş                 | 1 | 0 | 0 | 246 | 246 |
| AFAD Twitter | Pazarcık                      | 0 | 1 | 0 | 246 | 246 |
| AFAD Twitter | Earthquake                    | 1 | 1 | 1 | 246 | 246 |
| AFAD Twitter | Earthquake                    | 1 | 1 | 1 | 246 | 246 |
| AFAD Twitter | Kahramanmaraş                 | 1 | 0 | 0 | 249 | 249 |
| AFAD Twitter | Pazarcık                      | 0 | 1 | 0 | 249 | 249 |
| AFAD Twitter | Earthquake                    | 1 | 1 | 1 | 249 | 249 |
| AFAD Twitter | Earthquake                    | 1 | 1 | 1 | 249 | 249 |
| AFAD Twitter | Earthquake                    | 1 | 1 | 1 | 249 | 249 |
| AFAD Twitter | Earthquake                    | 1 | 1 | 1 | 249 | 249 |
| AFAD Twitter | Kahramanmaraş                 | 1 | 0 | 0 | 250 | 250 |

|              |                               |   |   |   |     |     |
|--------------|-------------------------------|---|---|---|-----|-----|
| AFAD Twitter | Pazarcık                      | 0 | 1 | 0 | 250 | 250 |
| AFAD Twitter | Earthquake                    | 1 | 1 | 1 | 250 | 250 |
| AFAD Twitter | Earthquake                    | 1 | 1 | 1 | 250 | 250 |
| AFAD Twitter | AFAD                          | 1 | 1 | 1 | 250 | 250 |
| AFAD Twitter | AFAD                          | 1 | 1 | 1 | 250 | 250 |
| AFAD Twitter | Earthquake                    | 1 | 1 | 1 | 250 | 250 |
| AFAD Twitter | Earthquake                    | 1 | 1 | 1 | 250 | 250 |
| AFAD Twitter | Kahramanmaraş                 | 1 | 0 | 0 | 252 | 252 |
| AFAD Twitter | Pazarcık                      | 0 | 1 | 0 | 252 | 252 |
| AFAD Twitter | Earthquake                    | 1 | 1 | 1 | 252 | 252 |
| AFAD Twitter | Earthquake                    | 1 | 1 | 1 | 252 | 252 |
| AFAD Twitter | AFAD                          | 1 | 1 | 1 | 252 | 252 |
| AFAD Twitter | AFAD                          | 1 | 1 | 1 | 252 | 252 |
| AFAD Twitter | Earthquake                    | 1 | 1 | 1 | 252 | 252 |
| AFAD Twitter | Earthquake                    | 1 | 1 | 1 | 252 | 252 |
| AFAD Twitter | Kahramanmaraş                 | 1 | 0 | 0 | 253 | 253 |
| AFAD Twitter | Pazarcık                      | 0 | 1 | 0 | 253 | 253 |
| AFAD Twitter | Earthquake                    | 1 | 1 | 1 | 253 | 253 |
| AFAD Twitter | Earthquake                    | 1 | 1 | 1 | 253 | 253 |
| AFAD Twitter | Earthquake                    | 1 | 1 | 1 | 254 | 254 |
| AFAD Twitter | Earthquake                    | 1 | 1 | 1 | 254 | 254 |
| AFAD Twitter | Disaster                      | 1 | 1 | 1 | 255 | 255 |
| AFAD Twitter | Disaster                      | 1 | 1 | 1 | 255 | 255 |
| AFAD Twitter | Shelter&meal\Sheltering       | 1 | 1 | 1 | 255 | 255 |
| AFAD Twitter | Shelter&meal\Sheltering       | 1 | 1 | 1 | 255 | 255 |
| AFAD Twitter | Disaster                      | 1 | 1 | 1 | 255 | 255 |
| AFAD Twitter | Disaster                      | 1 | 1 | 1 | 255 | 255 |
| AFAD Twitter | Earthquake                    | 1 | 1 | 1 | 256 | 256 |
| AFAD Twitter | Earthquake                    | 1 | 1 | 1 | 256 | 256 |
| AFAD Twitter | Earthquake                    | 1 | 1 | 1 | 258 | 258 |
| AFAD Twitter | Earthquake                    | 1 | 1 | 1 | 258 | 258 |
| AFAD Twitter | Shelter&meal\Sheltering       | 1 | 1 | 1 | 258 | 258 |
| AFAD Twitter | Shelter&meal\Sheltering       | 1 | 1 | 1 | 258 | 258 |
| AFAD Twitter | Response\Psychosocial support | 1 | 1 | 1 | 258 | 258 |
| AFAD Twitter | Response\Psychosocial support | 1 | 1 | 1 | 258 | 258 |
| AFAD Twitter | Earthquake                    | 1 | 1 | 1 | 259 | 259 |
| AFAD Twitter | Earthquake                    | 1 | 1 | 1 | 259 | 259 |
| AFAD Twitter | AFAD                          | 1 | 1 | 1 | 259 | 259 |
| AFAD Twitter | AFAD                          | 1 | 1 | 1 | 259 | 259 |
| AFAD Twitter | Coordination\Coordination     | 1 | 1 | 1 | 259 | 259 |
| AFAD Twitter | Coordination\Coordination     | 1 | 1 | 1 | 259 | 259 |
| AFAD Twitter | Earthquake                    | 1 | 1 | 1 | 261 | 261 |
| AFAD Twitter | Earthquake                    | 1 | 1 | 1 | 261 | 261 |
| AFAD Twitter | Earthquake                    | 1 | 1 | 1 | 262 | 262 |
| AFAD Twitter | Earthquake                    | 1 | 1 | 1 | 262 | 262 |
| AFAD Twitter | Disaster                      | 1 | 1 | 1 | 262 | 262 |
| AFAD Twitter | Disaster                      | 1 | 1 | 1 | 262 | 262 |
| AFAD Twitter | Shelter&meal\Sheltering       | 1 | 1 | 1 | 262 | 262 |
| AFAD Twitter | Shelter&meal\Sheltering       | 1 | 1 | 1 | 262 | 262 |
| AFAD Twitter | Disaster                      | 1 | 1 | 1 | 263 | 263 |
| AFAD Twitter | Disaster                      | 1 | 1 | 1 | 263 | 263 |
| AFAD Twitter | Disaster                      | 1 | 1 | 1 | 263 | 263 |
| AFAD Twitter | Disaster                      | 1 | 1 | 1 | 263 | 263 |
| AFAD Twitter | Disaster                      | 1 | 1 | 1 | 264 | 264 |
| AFAD Twitter | Disaster                      | 1 | 1 | 1 | 264 | 264 |
| AFAD Twitter | Earthquake                    | 1 | 1 | 1 | 264 | 264 |
| AFAD Twitter | Earthquake                    | 1 | 1 | 1 | 264 | 264 |
| AFAD Twitter | Earthquake                    | 1 | 1 | 1 | 265 | 265 |
| AFAD Twitter | Earthquake                    | 1 | 1 | 1 | 265 | 265 |
| AFAD Twitter | Earthquake                    | 1 | 1 | 1 | 266 | 266 |
| AFAD Twitter | Earthquake                    | 1 | 1 | 1 | 266 | 266 |
| AFAD Twitter | Earthquake                    | 1 | 1 | 1 | 267 | 267 |
| AFAD Twitter | Earthquake                    | 1 | 1 | 1 | 267 | 267 |
| AFAD Twitter | Earthquake                    | 1 | 1 | 1 | 267 | 267 |
| AFAD Twitter | Earthquake                    | 1 | 1 | 1 | 267 | 267 |
| AFAD Twitter | Earthquake                    | 1 | 1 | 1 | 268 | 268 |
| AFAD Twitter | Earthquake                    | 1 | 1 | 1 | 268 | 268 |
| AFAD Twitter | Shelter&meal\Sheltering       | 1 | 1 | 1 | 269 | 269 |
| AFAD Twitter | Shelter&meal\Sheltering       | 1 | 1 | 1 | 269 | 269 |

|              |                         |   |   |   |     |     |
|--------------|-------------------------|---|---|---|-----|-----|
| AFAD Twitter | Disaster                | 1 | 1 | 1 | 269 | 269 |
| AFAD Twitter | Disaster                | 1 | 1 | 1 | 269 | 269 |
| AFAD Twitter | Earthquake              | 1 | 1 | 1 | 269 | 269 |
| AFAD Twitter | Earthquake              | 1 | 1 | 1 | 269 | 269 |
| AFAD Twitter | Shelter&meal\Sheltering | 1 | 1 | 1 | 270 | 270 |
| AFAD Twitter | Shelter&meal\Sheltering | 1 | 1 | 1 | 270 | 270 |
| AFAD Twitter | Earthquake              | 1 | 1 | 1 | 270 | 270 |
| AFAD Twitter | Earthquake              | 1 | 1 | 1 | 270 | 270 |
| AFAD Twitter | Earthquake              | 1 | 1 | 1 | 272 | 272 |
| AFAD Twitter | Earthquake              | 1 | 1 | 1 | 272 | 272 |
| AFAD Twitter | Disaster                | 1 | 1 | 1 | 272 | 272 |
| AFAD Twitter | Disaster                | 1 | 1 | 1 | 272 | 272 |
| AFAD Twitter | Earthquake              | 1 | 1 | 1 | 275 | 275 |
| AFAD Twitter | Earthquake              | 1 | 1 | 1 | 275 | 275 |
| AFAD Twitter | Earthquake              | 1 | 1 | 1 | 275 | 275 |
| AFAD Twitter | Earthquake              | 1 | 1 | 1 | 275 | 275 |
| AFAD Twitter | Earthquake              | 1 | 1 | 1 | 275 | 275 |
| AFAD Twitter | Earthquake              | 1 | 1 | 1 | 275 | 275 |
| AFAD Twitter | AFAD                    | 1 | 1 | 1 | 275 | 275 |
| AFAD Twitter | AFAD                    | 1 | 1 | 1 | 275 | 275 |
| AFAD Twitter | Earthquake              | 1 | 1 | 1 | 276 | 276 |
| AFAD Twitter | Earthquake              | 1 | 1 | 1 | 276 | 276 |
| AFAD Twitter | Risk                    | 1 | 1 | 1 | 276 | 276 |
| AFAD Twitter | Risk                    | 1 | 1 | 1 | 276 | 276 |
| AFAD Twitter | Coordination\Resource   | 1 | 1 | 1 | 276 | 276 |
| AFAD Twitter | Coordination\Resource   | 1 | 1 | 1 | 276 | 276 |
| AFAD Twitter | Earthquake              | 1 | 1 | 1 | 277 | 277 |
| AFAD Twitter | Earthquake              | 1 | 1 | 1 | 277 | 277 |
| AFAD Twitter | Risk                    | 1 | 1 | 1 | 278 | 278 |
| AFAD Twitter | Risk                    | 1 | 1 | 1 | 278 | 278 |
| AFAD Twitter | Earthquake              | 1 | 1 | 1 | 279 | 279 |
| AFAD Twitter | Earthquake              | 1 | 1 | 1 | 279 | 279 |
| AFAD Twitter | Earthquake              | 1 | 1 | 1 | 280 | 280 |
| AFAD Twitter | Earthquake              | 1 | 1 | 1 | 280 | 280 |
| AFAD Twitter | Earthquake              | 1 | 1 | 1 | 280 | 280 |
| AFAD Twitter | Earthquake              | 1 | 1 | 1 | 280 | 280 |
| AFAD Twitter | Earthquake              | 1 | 1 | 1 | 280 | 280 |
| AFAD Twitter | Earthquake              | 1 | 1 | 1 | 280 | 280 |
| AFAD Twitter | Earthquake              | 1 | 1 | 1 | 280 | 280 |
| AFAD Twitter | Earthquake              | 1 | 1 | 1 | 281 | 281 |
| AFAD Twitter | Earthquake              | 1 | 1 | 1 | 281 | 281 |
| AFAD Twitter | AFAD                    | 1 | 1 | 1 | 281 | 281 |
| AFAD Twitter | AFAD                    | 1 | 1 | 1 | 281 | 281 |
| AFAD Twitter | Earthquake              | 1 | 1 | 1 | 283 | 283 |
| AFAD Twitter | Earthquake              | 1 | 1 | 1 | 283 | 283 |
| AFAD Twitter | AFAD                    | 1 | 1 | 1 | 283 | 283 |
| AFAD Twitter | AFAD                    | 1 | 1 | 1 | 283 | 283 |
| AFAD Twitter | Earthquake              | 1 | 1 | 1 | 283 | 283 |
| AFAD Twitter | Earthquake              | 1 | 1 | 1 | 283 | 283 |
| AFAD Twitter | Kahramanmaraş           | 1 | 0 | 0 | 284 | 284 |
| AFAD Twitter | Pazarcık                | 0 | 1 | 0 | 284 | 284 |
| AFAD Twitter | Earthquake              | 1 | 1 | 1 | 284 | 284 |
| AFAD Twitter | Earthquake              | 1 | 1 | 1 | 284 | 284 |
| AFAD Twitter | Shelter&meal\Sheltering | 1 | 1 | 1 | 284 | 284 |
| AFAD Twitter | Shelter&meal\Sheltering | 1 | 1 | 1 | 284 | 284 |
| AFAD Twitter | Shelter&meal\Tent       | 1 | 1 | 1 | 284 | 284 |
| AFAD Twitter | Shelter&meal\Tent       | 1 | 1 | 1 | 284 | 284 |
| AFAD Twitter | Earthquake              | 1 | 1 | 1 | 285 | 285 |
| AFAD Twitter | Earthquake              | 1 | 1 | 1 | 285 | 285 |
| AFAD Twitter | Shelter&meal\Tent       | 1 | 1 | 1 | 285 | 285 |
| AFAD Twitter | Shelter&meal\Tent       | 1 | 1 | 1 | 285 | 285 |
| AFAD Twitter | Shelter&meal\Tent       | 1 | 1 | 1 | 285 | 285 |
| AFAD Twitter | Shelter&meal\Tent       | 1 | 1 | 1 | 285 | 285 |
| AFAD Twitter | Shelter&meal\Tent       | 1 | 1 | 1 | 285 | 285 |
| AFAD Twitter | Shelter&meal\Tent       | 1 | 1 | 1 | 285 | 285 |
| AFAD Twitter | Earthquake              | 1 | 1 | 1 | 286 | 286 |
| AFAD Twitter | Earthquake              | 1 | 1 | 1 | 286 | 286 |
| AFAD Twitter | Shelter&meal\Tent       | 1 | 1 | 1 | 286 | 286 |



|              |                          |   |   |   |     |     |
|--------------|--------------------------|---|---|---|-----|-----|
| AFAD Twitter | Shelter&meal\Tent        | 1 | 1 | 1 | 286 | 286 |
| AFAD Twitter | Kahramanmaraş            | 1 | 0 | 0 | 286 | 286 |
| AFAD Twitter | Pazarcık                 | 0 | 1 | 0 | 286 | 286 |
| AFAD Twitter | Coordination\NGO         | 1 | 1 | 1 | 287 | 287 |
| AFAD Twitter | Coordination\NGO         | 1 | 1 | 1 | 287 | 287 |
| AFAD Twitter | Kahramanmaraş            | 1 | 0 | 0 | 288 | 288 |
| AFAD Twitter | Pazarcık                 | 0 | 1 | 0 | 288 | 288 |
| AFAD Twitter | Shelter&meal\Container   | 1 | 1 | 1 | 288 | 288 |
| AFAD Twitter | Shelter&meal\Container   | 1 | 1 | 1 | 288 | 288 |
| AFAD Twitter | Disaster                 | 1 | 1 | 1 | 288 | 288 |
| AFAD Twitter | Disaster                 | 1 | 1 | 1 | 288 | 288 |
| AFAD Twitter | Shelter&meal\Hygiene     | 1 | 1 | 1 | 288 | 288 |
| AFAD Twitter | Shelter&meal\Hygiene     | 1 | 1 | 1 | 288 | 288 |
| AFAD Twitter | Coordination\Cooperation | 1 | 1 | 1 | 290 | 290 |
| AFAD Twitter | Coordination\Cooperation | 1 | 1 | 1 | 290 | 290 |
| AFAD Twitter | Earthquake               | 1 | 1 | 1 | 293 | 293 |
| AFAD Twitter | Earthquake               | 1 | 1 | 1 | 293 | 293 |
| AFAD Twitter | Disaster                 | 1 | 1 | 1 | 293 | 293 |
| AFAD Twitter | Disaster                 | 1 | 1 | 1 | 293 | 293 |
| AFAD Twitter | Earthquake               | 1 | 1 | 1 | 294 | 294 |
| AFAD Twitter | Earthquake               | 1 | 1 | 1 | 294 | 294 |
| AFAD Twitter | Earthquake               | 1 | 1 | 1 | 294 | 294 |
| AFAD Twitter | Earthquake               | 1 | 1 | 1 | 294 | 294 |
| AFAD Twitter | Earthquake               | 1 | 1 | 1 | 294 | 294 |
| AFAD Twitter | Earthquake               | 1 | 1 | 1 | 294 | 294 |
| AFAD Twitter | AFAD                     | 1 | 1 | 1 | 294 | 294 |
| AFAD Twitter | AFAD                     | 1 | 1 | 1 | 294 | 294 |
| AFAD Twitter | Kahramanmaraş            | 1 | 0 | 0 | 295 | 295 |
| AFAD Twitter | Pazarcık                 | 0 | 1 | 0 | 295 | 295 |
| AFAD Twitter | Earthquake               | 1 | 1 | 1 | 295 | 295 |
| AFAD Twitter | Earthquake               | 1 | 1 | 1 | 295 | 295 |
| AFAD Twitter | Shelter&meal\Sheltering  | 1 | 1 | 1 | 295 | 295 |
| AFAD Twitter | Shelter&meal\Sheltering  | 1 | 1 | 1 | 295 | 295 |
| AFAD Twitter | Shelter&meal\Tent        | 1 | 1 | 1 | 295 | 295 |
| AFAD Twitter | Shelter&meal\Tent        | 1 | 1 | 1 | 295 | 295 |
| AFAD Twitter | Earthquake               | 1 | 1 | 1 | 296 | 296 |
| AFAD Twitter | Earthquake               | 1 | 1 | 1 | 296 | 296 |
| AFAD Twitter | Shelter&meal\Tent        | 1 | 1 | 1 | 296 | 296 |
| AFAD Twitter | Shelter&meal\Tent        | 1 | 1 | 1 | 296 | 296 |
| AFAD Twitter | Shelter&meal\Tent        | 1 | 1 | 1 | 296 | 296 |
| AFAD Twitter | Shelter&meal\Tent        | 1 | 1 | 1 | 296 | 296 |
| AFAD Twitter | Shelter&meal\Tent        | 1 | 1 | 1 | 296 | 296 |
| AFAD Twitter | Shelter&meal\Tent        | 1 | 1 | 1 | 296 | 296 |
| AFAD Twitter | Earthquake               | 1 | 1 | 1 | 297 | 297 |
| AFAD Twitter | Earthquake               | 1 | 1 | 1 | 297 | 297 |
| AFAD Twitter | Shelter&meal\Tent        | 1 | 1 | 1 | 297 | 297 |
| AFAD Twitter | Shelter&meal\Tent        | 1 | 1 | 1 | 297 | 297 |
| AFAD Twitter | Kahramanmaraş            | 1 | 0 | 0 | 297 | 297 |
| AFAD Twitter | Pazarcık                 | 0 | 1 | 0 | 297 | 297 |
| AFAD Twitter | Shelter&meal\Container   | 1 | 1 | 1 | 298 | 298 |
| AFAD Twitter | Shelter&meal\Container   | 1 | 1 | 1 | 298 | 298 |
| AFAD Twitter | Earthquake               | 1 | 1 | 1 | 298 | 298 |
| AFAD Twitter | Earthquake               | 1 | 1 | 1 | 298 | 298 |
| AFAD Twitter | Shelter&meal\Container   | 1 | 1 | 1 | 298 | 298 |
| AFAD Twitter | Shelter&meal\Container   | 1 | 1 | 1 | 298 | 298 |
| AFAD Twitter | Kahramanmaraş            | 1 | 0 | 0 | 298 | 298 |
| AFAD Twitter | Pazarcık                 | 0 | 1 | 0 | 298 | 298 |
| AFAD Twitter | Coordination\NGO         | 1 | 1 | 1 | 299 | 299 |
| AFAD Twitter | Coordination\NGO         | 1 | 1 | 1 | 299 | 299 |
| AFAD Twitter | Shelter&meal\Sheltering  | 1 | 1 | 1 | 301 | 301 |
| AFAD Twitter | Shelter&meal\Sheltering  | 1 | 1 | 1 | 301 | 301 |
| AFAD Twitter | Shelter&meal\Container   | 1 | 1 | 1 | 301 | 301 |
| AFAD Twitter | Shelter&meal\Container   | 1 | 1 | 1 | 301 | 301 |
| AFAD Twitter | Kahramanmaraş            | 1 | 0 | 0 | 302 | 302 |
| AFAD Twitter | Pazarcık                 | 0 | 1 | 0 | 302 | 302 |
| AFAD Twitter | Earthquake               | 1 | 1 | 1 | 302 | 302 |
| AFAD Twitter | Earthquake               | 1 | 1 | 1 | 302 | 302 |
| AFAD Twitter | AFAD                     | 1 | 1 | 1 | 302 | 302 |
| AFAD Twitter | AFAD                     | 1 | 1 | 1 | 302 | 302 |

|              |                          |   |   |   |     |     |
|--------------|--------------------------|---|---|---|-----|-----|
| AFAD Twitter | Earthquake               | 1 | 1 | 1 | 302 | 302 |
| AFAD Twitter | Earthquake               | 1 | 1 | 1 | 302 | 302 |
| AFAD Twitter | Earthquake               | 1 | 1 | 1 | 304 | 304 |
| AFAD Twitter | Earthquake               | 1 | 1 | 1 | 304 | 304 |
| AFAD Twitter | Earthquake               | 1 | 1 | 1 | 304 | 304 |
| AFAD Twitter | Earthquake               | 1 | 1 | 1 | 304 | 304 |
| AFAD Twitter | Earthquake               | 1 | 1 | 1 | 304 | 304 |
| AFAD Twitter | Earthquake               | 1 | 1 | 1 | 304 | 304 |
| AFAD Twitter | AFAD                     | 1 | 1 | 1 | 304 | 304 |
| AFAD Twitter | Shelter&meal\Sheltering  | 1 | 1 | 1 | 305 | 305 |
| AFAD Twitter | Shelter&meal\Sheltering  | 1 | 1 | 1 | 305 | 305 |
| AFAD Twitter | Earthquake               | 1 | 1 | 1 | 305 | 305 |
| AFAD Twitter | Earthquake               | 1 | 1 | 1 | 305 | 305 |
| AFAD Twitter | Earthquake               | 1 | 1 | 1 | 307 | 307 |
| AFAD Twitter | Earthquake               | 1 | 1 | 1 | 307 | 307 |
| AFAD Twitter | Shelter&meal\Sheltering  | 1 | 1 | 1 | 307 | 307 |
| AFAD Twitter | Shelter&meal\Sheltering  | 1 | 1 | 1 | 307 | 307 |
| AFAD Twitter | Shelter&meal\Container   | 1 | 1 | 1 | 307 | 307 |
| AFAD Twitter | Shelter&meal\Container   | 1 | 1 | 1 | 307 | 307 |
| AFAD Twitter | Earthquake               | 1 | 1 | 1 | 309 | 309 |
| AFAD Twitter | Earthquake               | 1 | 1 | 1 | 309 | 309 |
| AFAD Twitter | Earthquake               | 1 | 1 | 1 | 309 | 309 |
| AFAD Twitter | Earthquake               | 1 | 1 | 1 | 309 | 309 |
| AFAD Twitter | Earthquake               | 1 | 1 | 1 | 309 | 309 |
| AFAD Twitter | Earthquake               | 1 | 1 | 1 | 309 | 309 |
| AFAD Twitter | AFAD                     | 1 | 1 | 1 | 309 | 309 |
| AFAD Twitter | AFAD                     | 1 | 1 | 1 | 309 | 309 |
| AFAD Twitter | Earthquake               | 1 | 1 | 1 | 310 | 310 |
| AFAD Twitter | Earthquake               | 1 | 1 | 1 | 310 | 310 |
| AFAD Twitter | Response\Search&Rescue   | 1 | 1 | 1 | 310 | 310 |
| AFAD Twitter | Response\Search&Rescue   | 1 | 1 | 1 | 310 | 310 |
| AFAD Twitter | Earthquake               | 1 | 1 | 1 | 311 | 311 |
| AFAD Twitter | Earthquake               | 1 | 1 | 1 | 311 | 311 |
| AFAD Twitter | Risk                     | 1 | 1 | 1 | 311 | 311 |
| AFAD Twitter | Risk                     | 1 | 1 | 1 | 311 | 311 |
| AFAD Twitter | Earthquake               | 1 | 1 | 1 | 312 | 312 |
| AFAD Twitter | Earthquake               | 1 | 1 | 1 | 312 | 312 |
| AFAD Twitter | Response\Search&Rescue   | 1 | 1 | 1 | 312 | 312 |
| AFAD Twitter | Response\Search&Rescue   | 1 | 1 | 1 | 312 | 312 |
| AFAD Twitter | Response\Search&Rescue   | 1 | 1 | 1 | 312 | 312 |
| AFAD Twitter | Response\Search&Rescue   | 1 | 1 | 1 | 312 | 312 |
| AFAD Twitter | Earthquake               | 1 | 1 | 1 | 313 | 313 |
| AFAD Twitter | Earthquake               | 1 | 1 | 1 | 313 | 313 |
| AFAD Twitter | Response\Search&Rescue   | 1 | 1 | 1 | 314 | 314 |
| AFAD Twitter | Response\Search&Rescue   | 1 | 1 | 1 | 314 | 314 |
| AFAD Twitter | Response\Search&Rescue   | 1 | 1 | 1 | 314 | 314 |
| AFAD Twitter | Response\Search&Rescue   | 1 | 1 | 1 | 314 | 314 |
| AFAD Twitter | Earthquake               | 1 | 1 | 1 | 315 | 315 |
| AFAD Twitter | Earthquake               | 1 | 1 | 1 | 315 | 315 |
| AFAD Twitter | Shelter&meal\Container   | 1 | 1 | 1 | 315 | 315 |
| AFAD Twitter | Shelter&meal\Container   | 1 | 1 | 1 | 315 | 315 |
| AFAD Twitter | Shelter&meal\Tent        | 1 | 1 | 1 | 315 | 315 |
| AFAD Twitter | Shelter&meal\Tent        | 1 | 1 | 1 | 315 | 315 |
| AFAD Twitter | Coordination\Cooperation | 1 | 1 | 1 | 315 | 315 |
| AFAD Twitter | Coordination\Cooperation | 1 | 1 | 1 | 315 | 315 |
| AFAD Twitter | Earthquake               | 1 | 1 | 1 | 317 | 317 |
| AFAD Twitter | Earthquake               | 1 | 1 | 1 | 317 | 317 |
| AFAD Twitter | Response\Search&Rescue   | 1 | 1 | 1 | 318 | 318 |
| AFAD Twitter | Response\Search&Rescue   | 1 | 1 | 1 | 318 | 318 |
| AFAD Twitter | Response\Number of staff | 1 | 0 | 0 | 318 | 318 |
| AFAD Twitter | Response\Search&Rescue   | 1 | 1 | 1 | 318 | 318 |
| AFAD Twitter | Response\Search&Rescue   | 1 | 1 | 1 | 318 | 318 |
| AFAD Twitter | Response\Number          | 0 | 1 | 0 | 318 | 318 |
| AFAD Twitter | Response\Search&Rescue   | 1 | 1 | 1 | 318 | 318 |
| AFAD Twitter | Response\Search&Rescue   | 1 | 1 | 1 | 318 | 318 |
| AFAD Twitter | Disaster                 | 1 | 1 | 1 | 319 | 319 |
| AFAD Twitter | Disaster                 | 1 | 1 | 1 | 319 | 319 |
| AFAD Twitter | AFAD                     | 1 | 1 | 1 | 320 | 320 |

|              |                             |   |   |   |     |     |
|--------------|-----------------------------|---|---|---|-----|-----|
| AFAD Twitter | AFAD                        | 1 | 1 | 1 | 320 | 320 |
| AFAD Twitter | Disaster                    | 1 | 1 | 1 | 320 | 320 |
| AFAD Twitter | Disaster                    | 1 | 1 | 1 | 320 | 320 |
| AFAD Twitter | Coordination\Cooperation    | 1 | 1 | 1 | 320 | 320 |
| AFAD Twitter | Coordination\Cooperation    | 1 | 1 | 1 | 320 | 320 |
| AFAD Twitter | AFAD                        | 1 | 1 | 1 | 320 | 320 |
| AFAD Twitter | AFAD                        | 1 | 1 | 1 | 320 | 320 |
| AFAD Twitter | AFAD                        | 1 | 1 | 1 | 320 | 320 |
| AFAD Twitter | Shelter&meal\Sheltering     | 1 | 1 | 1 | 321 | 321 |
| AFAD Twitter | Shelter&meal\Sheltering     | 1 | 1 | 1 | 321 | 321 |
| AFAD Twitter | Shelter&meal\Tent           | 1 | 1 | 1 | 321 | 321 |
| AFAD Twitter | Shelter&meal\Tent           | 1 | 1 | 1 | 321 | 321 |
| AFAD Twitter | Shelter&meal\Tent           | 1 | 1 | 1 | 321 | 321 |
| AFAD Twitter | Shelter&meal\Tent           | 1 | 1 | 1 | 321 | 321 |
| AFAD Twitter | Shelter&meal\Tent           | 1 | 1 | 1 | 321 | 321 |
| AFAD Twitter | Shelter&meal\Tent           | 1 | 1 | 1 | 321 | 321 |
| AFAD Twitter | Earthquake                  | 1 | 1 | 1 | 322 | 322 |
| AFAD Twitter | Earthquake                  | 1 | 1 | 1 | 322 | 322 |
| AFAD Twitter | Shelter&meal\Tent           | 1 | 1 | 1 | 322 | 322 |
| AFAD Twitter | Shelter&meal\Tent           | 1 | 1 | 1 | 322 | 322 |
| AFAD Twitter | Kahramanmaraş               | 1 | 0 | 0 | 322 | 322 |
| AFAD Twitter | Pazarcık                    | 0 | 1 | 0 | 322 | 322 |
| AFAD Twitter | Earthquake                  | 1 | 1 | 1 | 323 | 323 |
| AFAD Twitter | Earthquake                  | 1 | 1 | 1 | 323 | 323 |
| AFAD Twitter | Shelter&meal\Container      | 1 | 1 | 1 | 323 | 323 |
| AFAD Twitter | Shelter&meal\Container      | 1 | 1 | 1 | 323 | 323 |
| AFAD Twitter | Shelter&meal\Container      | 1 | 1 | 1 | 323 | 323 |
| AFAD Twitter | Shelter&meal\Container      | 1 | 1 | 1 | 323 | 323 |
| AFAD Twitter | Disaster                    | 1 | 1 | 1 | 324 | 324 |
| AFAD Twitter | Disaster                    | 1 | 1 | 1 | 324 | 324 |
| AFAD Twitter | Disaster                    | 1 | 1 | 1 | 324 | 324 |
| AFAD Twitter | Disaster                    | 1 | 1 | 1 | 324 | 324 |
| AFAD Twitter | Shelter&meal\Tent           | 1 | 1 | 1 | 324 | 324 |
| AFAD Twitter | Shelter&meal\Tent           | 1 | 1 | 1 | 324 | 324 |
| AFAD Twitter | Shelter&meal\Container      | 1 | 1 | 1 | 324 | 324 |
| AFAD Twitter | Shelter&meal\Container      | 1 | 1 | 1 | 324 | 324 |
| AFAD Twitter | Shelter&meal\Sheltering     | 1 | 1 | 1 | 324 | 324 |
| AFAD Twitter | Shelter&meal\Sheltering     | 1 | 1 | 1 | 324 | 324 |
| AFAD Twitter | Disaster                    | 1 | 1 | 1 | 325 | 325 |
| AFAD Twitter | Disaster                    | 1 | 1 | 1 | 325 | 325 |
| AFAD Twitter | Shelter&meal\Evacuation     | 1 | 1 | 1 | 325 | 325 |
| AFAD Twitter | Shelter&meal\Evacuation     | 1 | 1 | 1 | 325 | 325 |
| AFAD Twitter | AFAD                        | 1 | 1 | 1 | 325 | 325 |
| AFAD Twitter | AFAD                        | 1 | 1 | 1 | 325 | 325 |
| AFAD Twitter | Coordination\Coordination   | 1 | 1 | 1 | 325 | 325 |
| AFAD Twitter | Coordination\Coordination   | 1 | 1 | 1 | 325 | 325 |
| AFAD Twitter | Response\Military           | 1 | 1 | 1 | 325 | 325 |
| AFAD Twitter | Response\Military           | 1 | 1 | 1 | 325 | 325 |
| AFAD Twitter | Shelter&meal\Evacuation     | 1 | 1 | 1 | 325 | 325 |
| AFAD Twitter | Shelter&meal\Evacuation     | 1 | 1 | 1 | 325 | 325 |
| AFAD Twitter | Shelter&meal\Evacuation     | 1 | 1 | 1 | 325 | 325 |
| AFAD Twitter | Shelter&meal\Evacuation     | 1 | 1 | 1 | 325 | 325 |
| AFAD Twitter | Response\Coast guard&Navy   | 1 | 1 | 1 | 325 | 325 |
| AFAD Twitter | Response\Coast guard&Navy   | 1 | 1 | 1 | 325 | 325 |
| AFAD Twitter | Response\Military           | 1 | 1 | 1 | 326 | 326 |
| AFAD Twitter | Response\Military           | 1 | 1 | 1 | 326 | 326 |
| AFAD Twitter | AFAD                        | 1 | 1 | 1 | 327 | 327 |
| AFAD Twitter | AFAD                        | 1 | 1 | 1 | 327 | 327 |
| AFAD Twitter | Response\Military           | 1 | 1 | 1 | 327 | 327 |
| AFAD Twitter | Response\Military           | 1 | 1 | 1 | 327 | 327 |
| AFAD Twitter | Coordination\NGO            | 1 | 1 | 1 | 327 | 327 |
| AFAD Twitter | Coordination\NGO            | 1 | 1 | 1 | 327 | 327 |
| AFAD Twitter | Shelter&meal\Mobile kitchen | 1 | 1 | 1 | 327 | 327 |
| AFAD Twitter | Shelter&meal\Mobile kitchen | 1 | 1 | 1 | 327 | 327 |
| AFAD Twitter | Shelter&meal\Mobile bakery  | 1 | 1 | 1 | 327 | 327 |
| AFAD Twitter | Shelter&meal\Mobile bakery  | 1 | 1 | 1 | 327 | 327 |
| AFAD Twitter | Disaster                    | 1 | 1 | 1 | 327 | 327 |
| AFAD Twitter | Disaster                    | 1 | 1 | 1 | 327 | 327 |

|              |                          |   |   |   |     |     |
|--------------|--------------------------|---|---|---|-----|-----|
| AFAD Twitter | Shelter&meal\Hot meal    | 1 | 1 | 1 | 327 | 327 |
| AFAD Twitter | Shelter&meal\Hot meal    | 1 | 1 | 1 | 327 | 327 |
| AFAD Twitter | Coordination\NGO         | 1 | 1 | 1 | 328 | 328 |
| AFAD Twitter | Coordination\NGO         | 1 | 1 | 1 | 328 | 328 |
| AFAD Twitter | AFAD                     | 1 | 1 | 1 | 330 | 330 |
| AFAD Twitter | AFAD                     | 1 | 1 | 1 | 330 | 330 |
| AFAD Twitter | Disaster                 | 1 | 1 | 1 | 330 | 330 |
| AFAD Twitter | Disaster                 | 1 | 1 | 1 | 330 | 330 |
| AFAD Twitter | Earthquake               | 1 | 1 | 1 | 330 | 330 |
| AFAD Twitter | Earthquake               | 1 | 1 | 1 | 330 | 330 |
| AFAD Twitter | Coordination\Cooperation | 1 | 1 | 1 | 330 | 330 |
| AFAD Twitter | Coordination\Cooperation | 1 | 1 | 1 | 330 | 330 |
| AFAD Twitter | Disaster                 | 1 | 1 | 1 | 330 | 330 |
| AFAD Twitter | Disaster                 | 1 | 1 | 1 | 330 | 330 |
| AFAD Twitter | AFAD                     | 1 | 1 | 1 | 330 | 330 |
| AFAD Twitter | AFAD                     | 1 | 1 | 1 | 330 | 330 |
| AFAD Twitter | Earthquake               | 1 | 1 | 1 | 331 | 331 |
| AFAD Twitter | Earthquake               | 1 | 1 | 1 | 331 | 331 |
| AFAD Twitter | Coordination\Cooperation | 1 | 1 | 1 | 331 | 331 |
| AFAD Twitter | Coordination\Cooperation | 1 | 1 | 1 | 331 | 331 |
| AFAD Twitter | Coordination\NGO         | 1 | 1 | 1 | 333 | 333 |
| AFAD Twitter | Coordination\NGO         | 1 | 1 | 1 | 333 | 333 |
| AFAD Twitter | Earthquake               | 1 | 1 | 1 | 334 | 334 |
| AFAD Twitter | Earthquake               | 1 | 1 | 1 | 334 | 334 |
| AFAD Twitter | Kahramanmaraş            | 1 | 0 | 0 | 334 | 334 |
| AFAD Twitter | Pazarcık                 | 0 | 1 | 0 | 334 | 334 |
| AFAD Twitter | Kahramanmaraş            | 1 | 0 | 0 | 335 | 335 |
| AFAD Twitter | Pazarcık                 | 0 | 1 | 0 | 335 | 335 |
| AFAD Twitter | Earthquake               | 1 | 1 | 1 | 335 | 335 |
| AFAD Twitter | Earthquake               | 1 | 1 | 1 | 335 | 335 |
| AFAD Twitter | Shelter&meal\Sheltering  | 1 | 1 | 1 | 335 | 335 |
| AFAD Twitter | Shelter&meal\Sheltering  | 1 | 1 | 1 | 335 | 335 |
| AFAD Twitter | Shelter&meal\Tent        | 1 | 1 | 1 | 335 | 335 |
| AFAD Twitter | Shelter&meal\Tent        | 1 | 1 | 1 | 335 | 335 |
| AFAD Twitter | Shelter&meal\Tent        | 1 | 1 | 1 | 335 | 335 |
| AFAD Twitter | Shelter&meal\Tent        | 1 | 1 | 1 | 335 | 335 |
| AFAD Twitter | Shelter&meal\Tent        | 1 | 1 | 1 | 335 | 335 |
| AFAD Twitter | Shelter&meal\Sheltering  | 1 | 1 | 1 | 335 | 335 |
| AFAD Twitter | Shelter&meal\Sheltering  | 1 | 1 | 1 | 335 | 335 |
| AFAD Twitter | Earthquake               | 1 | 1 | 1 | 336 | 336 |
| AFAD Twitter | Earthquake               | 1 | 1 | 1 | 336 | 336 |
| AFAD Twitter | Shelter&meal\Container   | 1 | 1 | 1 | 336 | 336 |
| AFAD Twitter | Shelter&meal\Container   | 1 | 1 | 1 | 336 | 336 |
| AFAD Twitter | Shelter&meal\Container   | 1 | 1 | 1 | 336 | 336 |
| AFAD Twitter | Shelter&meal\Container   | 1 | 1 | 1 | 336 | 336 |
| AFAD Twitter | Shelter&meal\Container   | 1 | 1 | 1 | 336 | 336 |
| AFAD Twitter | Shelter&meal\Sheltering  | 1 | 1 | 1 | 336 | 336 |
| AFAD Twitter | Shelter&meal\Sheltering  | 1 | 1 | 1 | 336 | 336 |
| AFAD Twitter | Disaster                 | 1 | 1 | 1 | 337 | 337 |
| AFAD Twitter | Disaster                 | 1 | 1 | 1 | 337 | 337 |
| AFAD Twitter | Shelter&meal\Sheltering  | 1 | 1 | 1 | 337 | 337 |
| AFAD Twitter | Shelter&meal\Sheltering  | 1 | 1 | 1 | 337 | 337 |
| AFAD Twitter | Shelter&meal\Sheltering  | 1 | 1 | 1 | 337 | 337 |
| AFAD Twitter | Shelter&meal\Sheltering  | 1 | 1 | 1 | 337 | 337 |
| AFAD Twitter | Shelter&meal\Sheltering  | 1 | 1 | 1 | 337 | 337 |
| AFAD Twitter | Shelter&meal\Container   | 1 | 1 | 1 | 337 | 337 |
| AFAD Twitter | Shelter&meal\Container   | 1 | 1 | 1 | 337 | 337 |
| AFAD Twitter | Earthquake               | 1 | 1 | 1 | 338 | 338 |
| AFAD Twitter | Earthquake               | 1 | 1 | 1 | 338 | 338 |
| AFAD Twitter | Response\Number of staff | 1 | 0 | 0 | 338 | 338 |
| AFAD Twitter | Response\Search&Rescue   | 1 | 1 | 1 | 338 | 338 |
| AFAD Twitter | Response\Search&Rescue   | 1 | 1 | 1 | 338 | 338 |
| AFAD Twitter | Response\Number          | 0 | 1 | 0 | 338 | 338 |
| AFAD Twitter | Earthquake               | 1 | 1 | 1 | 339 | 339 |
| AFAD Twitter | Earthquake               | 1 | 1 | 1 | 339 | 339 |
| AFAD Twitter | AFAD                     | 1 | 1 | 1 | 339 | 339 |
| AFAD Twitter | AFAD                     | 1 | 1 | 1 | 339 | 339 |
| AFAD Twitter | Response\Military        | 1 | 1 | 1 | 339 | 339 |

|              |                                 |   |   |   |     |     |
|--------------|---------------------------------|---|---|---|-----|-----|
| AFAD Twitter | Response\Military               | 1 | 1 | 1 | 339 | 339 |
| AFAD Twitter | Shelter&meal\Mobile kitchen     | 1 | 1 | 1 | 339 | 339 |
| AFAD Twitter | Shelter&meal\Mobile kitchen     | 1 | 1 | 1 | 339 | 339 |
| AFAD Twitter | Shelter&meal\Hot meal           | 1 | 1 | 1 | 339 | 339 |
| AFAD Twitter | Shelter&meal\Hot meal           | 1 | 1 | 1 | 339 | 339 |
| AFAD Twitter | AFAD                            | 1 | 1 | 1 | 341 | 341 |
| AFAD Twitter | AFAD                            | 1 | 1 | 1 | 341 | 341 |
| AFAD Twitter | AFAD                            | 1 | 1 | 1 | 343 | 343 |
| AFAD Twitter | AFAD                            | 1 | 1 | 1 | 343 | 343 |
| AFAD Twitter | Earthquake                      | 1 | 1 | 1 | 344 | 344 |
| AFAD Twitter | Earthquake                      | 1 | 1 | 1 | 344 | 344 |
| AFAD Twitter | Earthquake                      | 1 | 1 | 1 | 344 | 344 |
| AFAD Twitter | Earthquake                      | 1 | 1 | 1 | 344 | 344 |
| AFAD Twitter | Coordination\NGO                | 1 | 1 | 1 | 345 | 345 |
| AFAD Twitter | Coordination\NGO                | 1 | 1 | 1 | 345 | 345 |
| AFAD Twitter | Kahramanmaraş                   | 1 | 0 | 0 | 347 | 347 |
| AFAD Twitter | Pazarcık                        | 0 | 1 | 0 | 347 | 347 |
| AFAD Twitter | Earthquake                      | 1 | 1 | 1 | 347 | 347 |
| AFAD Twitter | Earthquake                      | 1 | 1 | 1 | 347 | 347 |
| AFAD Twitter | Earthquake                      | 1 | 1 | 1 | 348 | 348 |
| AFAD Twitter | Earthquake                      | 1 | 1 | 1 | 348 | 348 |
| AFAD Twitter | Kahramanmaraş                   | 1 | 0 | 0 | 349 | 349 |
| AFAD Twitter | Pazarcık                        | 0 | 1 | 0 | 349 | 349 |
| AFAD Twitter | Earthquake                      | 1 | 1 | 1 | 349 | 349 |
| AFAD Twitter | Earthquake                      | 1 | 1 | 1 | 349 | 349 |
| AFAD Twitter | Shelter&meal\Sheltering         | 1 | 1 | 1 | 349 | 349 |
| AFAD Twitter | Shelter&meal\Sheltering         | 1 | 1 | 1 | 349 | 349 |
| AFAD Twitter | Shelter&meal\Tent               | 1 | 1 | 1 | 349 | 349 |
| AFAD Twitter | Shelter&meal\Tent               | 1 | 1 | 1 | 349 | 349 |
| AFAD Twitter | Shelter&meal\Tent               | 1 | 1 | 1 | 349 | 349 |
| AFAD Twitter | Shelter&meal\Tent               | 1 | 1 | 1 | 349 | 349 |
| AFAD Twitter | Shelter&meal\Tent               | 1 | 1 | 1 | 349 | 349 |
| AFAD Twitter | Shelter&meal\Tent               | 1 | 1 | 1 | 349 | 349 |
| AFAD Twitter | Shelter&meal\Sheltering         | 1 | 1 | 1 | 349 | 349 |
| AFAD Twitter | Shelter&meal\Sheltering         | 1 | 1 | 1 | 349 | 349 |
| AFAD Twitter | Earthquake                      | 1 | 1 | 1 | 350 | 350 |
| AFAD Twitter | Earthquake                      | 1 | 1 | 1 | 350 | 350 |
| AFAD Twitter | Shelter&meal\Container          | 1 | 1 | 1 | 350 | 350 |
| AFAD Twitter | Shelter&meal\Container          | 1 | 1 | 1 | 350 | 350 |
| AFAD Twitter | Shelter&meal\Container          | 1 | 1 | 1 | 350 | 350 |
| AFAD Twitter | Shelter&meal\Container          | 1 | 1 | 1 | 350 | 350 |
| AFAD Twitter | Shelter&meal\Container          | 1 | 1 | 1 | 350 | 350 |
| AFAD Twitter | Shelter&meal\Sheltering         | 1 | 1 | 1 | 350 | 350 |
| AFAD Twitter | Shelter&meal\Sheltering         | 1 | 1 | 1 | 350 | 350 |
| AFAD Twitter | Shelter&meal\Container          | 1 | 1 | 1 | 352 | 352 |
| AFAD Twitter | Shelter&meal\Container          | 1 | 1 | 1 | 352 | 352 |
| AFAD Twitter | Earthquake                      | 1 | 1 | 1 | 353 | 353 |
| AFAD Twitter | Earthquake                      | 1 | 1 | 1 | 353 | 353 |
| AFAD Twitter | Shelter&meal\Container          | 1 | 1 | 1 | 353 | 353 |
| AFAD Twitter | Shelter&meal\Container          | 1 | 1 | 1 | 353 | 353 |
| AFAD Twitter | Earthquake                      | 1 | 1 | 1 | 357 | 357 |
| AFAD Twitter | Earthquake                      | 1 | 1 | 1 | 357 | 357 |
| AFAD Twitter | Coordination\Social media       | 1 | 0 | 0 | 358 | 358 |
| AFAD Twitter | Coordination\Social media usage | 0 | 1 | 0 | 358 | 358 |
| AFAD Twitter | Disaster                        | 1 | 1 | 1 | 358 | 358 |
| AFAD Twitter | Disaster                        | 1 | 1 | 1 | 358 | 358 |
| AFAD Twitter | Disaster                        | 1 | 1 | 1 | 358 | 358 |
| AFAD Twitter | Disaster                        | 1 | 1 | 1 | 358 | 358 |
| AFAD Twitter | Response\Search&Rescue          | 1 | 1 | 1 | 359 | 359 |
| AFAD Twitter | Response\Search&Rescue          | 1 | 1 | 1 | 359 | 359 |
| AFAD Twitter | Earthquake                      | 1 | 1 | 1 | 360 | 360 |
| AFAD Twitter | Earthquake                      | 1 | 1 | 1 | 360 | 360 |
| AFAD Twitter | Risk                            | 1 | 1 | 1 | 360 | 360 |
| AFAD Twitter | Risk                            | 1 | 1 | 1 | 360 | 360 |
| AFAD Twitter | AFAD                            | 1 | 1 | 1 | 361 | 361 |
| AFAD Twitter | AFAD                            | 1 | 1 | 1 | 361 | 361 |
| AFAD Twitter | Coordination\NGO                | 1 | 1 | 1 | 361 | 361 |
| AFAD Twitter | Coordination\NGO                | 1 | 1 | 1 | 361 | 361 |

|                                                                 |                          |   |   |   |        |        |
|-----------------------------------------------------------------|--------------------------|---|---|---|--------|--------|
| AFAD Twitter                                                    | Response\Search&Rescue   | 1 | 1 | 1 | 361    | 361    |
| AFAD Twitter                                                    | Response\Search&Rescue   | 1 | 1 | 1 | 361    | 361    |
| AFAD Twitter                                                    | AFAD                     | 1 | 1 | 1 | 361    | 361    |
| AFAD Twitter                                                    | AFAD                     | 1 | 1 | 1 | 361    | 361    |
| AFAD Twitter                                                    | Earthquake               | 1 | 1 | 1 | 363    | 363    |
| AFAD Twitter                                                    | Earthquake               | 1 | 1 | 1 | 363    | 363    |
| AFAD Twitter                                                    | Earthquake               | 1 | 1 | 1 | 363    | 363    |
| AFAD Twitter                                                    | Earthquake               | 1 | 1 | 1 | 363    | 363    |
| AFAD Twitter                                                    | Disaster                 | 1 | 1 | 1 | 364    | 364    |
| AFAD Twitter                                                    | Disaster                 | 1 | 1 | 1 | 364    | 364    |
| AFAD Twitter                                                    | Shelter&meal\Container   | 1 | 1 | 1 | 364    | 364    |
| AFAD Twitter                                                    | Shelter&meal\Container   | 1 | 1 | 1 | 364    | 364    |
| AFAD Twitter                                                    | Coordination\Cooperation | 1 | 1 | 1 | 364    | 364    |
| AFAD Twitter                                                    | Coordination\Cooperation | 1 | 1 | 1 | 364    | 364    |
| AFAD Twitter                                                    | Disaster                 | 1 | 1 | 1 | 366    | 366    |
| AFAD Twitter                                                    | Disaster                 | 1 | 1 | 1 | 366    | 366    |
| AFAD Twitter                                                    | Earthquake               | 1 | 1 | 1 | 368    | 368    |
| AFAD Twitter                                                    | Earthquake               | 1 | 1 | 1 | 368    | 368    |
| AFAD Twitter                                                    | Risk                     | 1 | 1 | 1 | 368    | 368    |
| AFAD Twitter                                                    | Risk                     | 1 | 1 | 1 | 368    | 368    |
| AFAD Arama ve Kurtarma Teknisyeni Sayısına Yönelik İddialar - B | AFAD                     | 1 | 1 | 1 | 1: 17  | 1: 20  |
| AFAD Arama ve Kurtarma Teknisyeni Sayısına Yönelik İddialar - B | AFAD                     | 1 | 1 | 1 | 1: 17  | 1: 20  |
| AFAD Arama ve Kurtarma Teknisyeni Sayısına Yönelik İddialar - B | AFAD                     | 1 | 1 | 1 | 1: 107 | 1: 110 |
| AFAD Arama ve Kurtarma Teknisyeni Sayısına Yönelik İddialar - B | AFAD                     | 1 | 1 | 1 | 1: 107 | 1: 110 |
| AFAD Arama ve Kurtarma Teknisyeni Sayısına Yönelik İddialar - B | AFAD                     | 1 | 1 | 1 | 1: 119 | 1: 122 |
| AFAD Arama ve Kurtarma Teknisyeni Sayısına Yönelik İddialar - B | AFAD                     | 1 | 1 | 1 | 1: 119 | 1: 122 |
| AFAD Arama ve Kurtarma Teknisyeni Sayısına Yönelik İddialar - B | AFAD                     | 1 | 1 | 1 | 1: 200 | 1: 203 |
| AFAD Arama ve Kurtarma Teknisyeni Sayısına Yönelik İddialar - B | AFAD                     | 1 | 1 | 1 | 1: 200 | 1: 203 |
| AFAD Arama ve Kurtarma Teknisyeni Sayısına Yönelik İddialar - B | AFAD                     | 1 | 1 | 1 | 1: 329 | 1: 332 |
| AFAD Arama ve Kurtarma Teknisyeni Sayısına Yönelik İddialar - B | AFAD                     | 1 | 1 | 1 | 1: 329 | 1: 332 |
| AFAD Arama ve Kurtarma Teknisyeni Sayısına Yönelik İddialar - B | AFAD                     | 1 | 1 | 1 | 1: 442 | 1: 445 |

|                                                                 |                        |   |   |   |         |         |
|-----------------------------------------------------------------|------------------------|---|---|---|---------|---------|
| AFAD Arama ve Kurtarma Teknisyeni Sayısına Yönelik İddialar - B | AFAD                   | 1 | 1 | 1 | 1: 442  | 1: 445  |
| AFAD Arama ve Kurtarma Teknisyeni Sayısına Yönelik İddialar - B | Disaster               | 1 | 1 | 1 | 1: 616  | 1: 619  |
| AFAD Arama ve Kurtarma Teknisyeni Sayısına Yönelik İddialar - B | Disaster               | 1 | 1 | 1 | 1: 616  | 1: 619  |
| AFAD Arama ve Kurtarma Teknisyeni Sayısına Yönelik İddialar - B | Emergency              | 1 | 1 | 1 | 1: 624  | 1: 633  |
| AFAD Arama ve Kurtarma Teknisyeni Sayısına Yönelik İddialar - B | Emergency              | 1 | 1 | 1 | 1: 624  | 1: 633  |
| AFAD Arama ve Kurtarma Teknisyeni Sayısına Yönelik İddialar - B | Disaster               | 1 | 1 | 1 | 1: 752  | 1: 755  |
| AFAD Arama ve Kurtarma Teknisyeni Sayısına Yönelik İddialar - B | Disaster               | 1 | 1 | 1 | 1: 752  | 1: 755  |
| AFAD Arama ve Kurtarma Teknisyeni Sayısına Yönelik İddialar - B | Risk                   | 1 | 1 | 1 | 1: 757  | 1: 760  |
| AFAD Arama ve Kurtarma Teknisyeni Sayısına Yönelik İddialar - B | Risk                   | 1 | 1 | 1 | 1: 757  | 1: 760  |
| AFAD Arama ve Kurtarma Teknisyeni Sayısına Yönelik İddialar - B | Kahramanmaraş          | 1 | 0 | 0 | 1: 796  | 1: 808  |
| AFAD Arama ve Kurtarma Teknisyeni Sayısına Yönelik İddialar - B | Pazarcık               | 0 | 1 | 0 | 1: 796  | 1: 808  |
| AFAD Arama ve Kurtarma Teknisyeni Sayısına Yönelik İddialar - B | Kahramanmaraş          | 1 | 0 | 0 | 1: 1104 | 1: 1116 |
| AFAD Arama ve Kurtarma Teknisyeni Sayısına Yönelik İddialar - B | Pazarcık               | 0 | 1 | 0 | 1: 1104 | 1: 1116 |
| AFAD Arama ve Kurtarma Teknisyeni Sayısına Yönelik İddialar - B | Response\Search&Rescue | 1 | 1 | 1 | 1: 1434 | 1: 1447 |
| AFAD Arama ve Kurtarma Teknisyeni Sayısına Yönelik İddialar - B | Response\Search&Rescue | 1 | 1 | 1 | 1: 1434 | 1: 1447 |
| AFAD Arama ve Kurtarma Teknisyeni Sayısına Yönelik İddialar - B | Disaster               | 1 | 1 | 1 | 1: 1556 | 1: 1559 |

|                                                                 |                               |   |   |   |         |         |
|-----------------------------------------------------------------|-------------------------------|---|---|---|---------|---------|
| AFAD Arama ve Kurtarma Teknisyeni Sayısına Yönelik İddialar - B | Disaster                      | 1 | 1 | 1 | 1: 1556 | 1: 1559 |
| AFAD Arama ve Kurtarma Teknisyeni Sayısına Yönelik İddialar - B | Coordination\Public relations | 1 | 1 | 1 | 1: 1605 | 1: 1610 |
| AFAD Arama ve Kurtarma Teknisyeni Sayısına Yönelik İddialar - B | Coordination\Public relations | 1 | 1 | 1 | 1: 1605 | 1: 1610 |
| AFAD Arama ve Kurtarma Teknisyeni Sayısına Yönelik İddialar - B | AFAD                          | 1 | 1 | 1 | 1: 1645 | 1: 1648 |
| AFAD Arama ve Kurtarma Teknisyeni Sayısına Yönelik İddialar - B | AFAD                          | 1 | 1 | 1 | 1: 1645 | 1: 1648 |
| AFAD Arama ve Kurtarma Teknisyeni Sayısına Yönelik İddialar - B | AFAD                          | 1 | 1 | 1 | 1: 1703 | 1: 1706 |
| AFAD Arama ve Kurtarma Teknisyeni Sayısına Yönelik İddialar - B | AFAD                          | 1 | 1 | 1 | 1: 1703 | 1: 1706 |
| AFAD Arama ve Kurtarma Teknisyeni Sayısına Yönelik İddialar - B | Response\Search&Rescue        | 1 | 1 | 1 | 1: 1821 | 1: 1834 |
| AFAD Arama ve Kurtarma Teknisyeni Sayısına Yönelik İddialar - B | Response\Search&Rescue        | 1 | 1 | 1 | 1: 1821 | 1: 1834 |
| AFAD Arama ve Kurtarma Teknisyeni Sayısına Yönelik İddialar - B | Disaster                      | 1 | 1 | 1 | 1: 1885 | 1: 1888 |
| AFAD Arama ve Kurtarma Teknisyeni Sayısına Yönelik İddialar - B | Disaster                      | 1 | 1 | 1 | 1: 1885 | 1: 1888 |
| AFAD Arama ve Kurtarma Teknisyeni Sayısına Yönelik İddialar - B | AFAD                          | 1 | 1 | 1 | 1: 1903 | 1: 1906 |
| AFAD Arama ve Kurtarma Teknisyeni Sayısına Yönelik İddialar - B | AFAD                          | 1 | 1 | 1 | 1: 1903 | 1: 1906 |
| AFAD Arama ve Kurtarma Teknisyeni Sayısına Yönelik İddialar - B | Recovery\Fund drive           | 1 | 1 | 1 | 1: 2022 | 1: 2040 |
| AFAD Arama ve Kurtarma Teknisyeni Sayısına Yönelik İddialar - B | Recovery\Fund drive           | 1 | 1 | 1 | 1: 2022 | 1: 2040 |
| AFAD Arama ve Kurtarma Teknisyeni Sayısına Yönelik İddialar - B | AFAD                          | 1 | 1 | 1 | 2: 17   | 2: 20   |



|                                                                 |                                 |   |   |   |        |        |
|-----------------------------------------------------------------|---------------------------------|---|---|---|--------|--------|
| AFAD Arama ve Kurtarma Teknisyeni Sayısına Yönelik İddialar - B | AFAD                            | 1 | 1 | 1 | 2: 17  | 2: 20  |
| AFAD Arama ve Kurtarma Teknisyeni Sayısına Yönelik İddialar - B | AFAD                            | 1 | 1 | 1 | 2: 107 | 2: 110 |
| AFAD Arama ve Kurtarma Teknisyeni Sayısına Yönelik İddialar - B | AFAD                            | 1 | 1 | 1 | 2: 107 | 2: 110 |
| AFAD Arama ve Kurtarma Teknisyeni Sayısına Yönelik İddialar - B | AFAD                            | 1 | 1 | 1 | 2: 119 | 2: 122 |
| AFAD Arama ve Kurtarma Teknisyeni Sayısına Yönelik İddialar - B | AFAD                            | 1 | 1 | 1 | 2: 119 | 2: 122 |
| AFAD Arama ve Kurtarma Teknisyeni Sayısına Yönelik İddialar - B | AFAD                            | 1 | 1 | 1 | 2: 283 | 2: 286 |
| AFAD Arama ve Kurtarma Teknisyeni Sayısına Yönelik İddialar - B | AFAD                            | 1 | 1 | 1 | 2: 283 | 2: 286 |
| AFAD Arama ve Kurtarma Teknisyeni Sayısına Yönelik İddialar - B | Preparedness\Preparedness       | 1 | 1 | 1 | 2: 313 | 2: 323 |
| AFAD Arama ve Kurtarma Teknisyeni Sayısına Yönelik İddialar - B | Preparedness\Preparedness       | 1 | 1 | 1 | 2: 313 | 2: 323 |
| AFAD Arama ve Kurtarma Teknisyeni Sayısına Yönelik İddialar - B | Disaster                        | 1 | 1 | 1 | 2: 313 | 2: 316 |
| AFAD Arama ve Kurtarma Teknisyeni Sayısına Yönelik İddialar - B | Disaster                        | 1 | 1 | 1 | 2: 313 | 2: 316 |
| AFAD Arama ve Kurtarma Teknisyeni Sayısına Yönelik İddialar - B | Disaster                        | 1 | 1 | 1 | 2: 361 | 2: 364 |
| AFAD Arama ve Kurtarma Teknisyeni Sayısına Yönelik İddialar - B | Disaster                        | 1 | 1 | 1 | 2: 361 | 2: 364 |
| AFAD Arama ve Kurtarma Teknisyeni Sayısına Yönelik İddialar - B | Coordination\Social media       | 1 | 0 | 0 | 2: 456 | 2: 467 |
| AFAD Arama ve Kurtarma Teknisyeni Sayısına Yönelik İddialar - B | Coordination\Social media usage | 0 | 1 | 0 | 2: 456 | 2: 467 |
| AFAD Arama ve Kurtarma Teknisyeni Sayısına Yönelik İddialar - B | AFAD                            | 1 | 1 | 1 | 2: 512 | 2: 515 |

|                                                                 |                                 |   |   |   |        |        |
|-----------------------------------------------------------------|---------------------------------|---|---|---|--------|--------|
| AFAD Arama ve Kurtarma Teknisyeni Sayısına Yönelik İddialar - B | AFAD                            | 1 | 1 | 1 | 2: 512 | 2: 515 |
| AFAD Arama ve Kurtarma Teknisyeni Sayısına Yönelik İddialar - B | AFAD                            | 1 | 1 | 1 | 2: 534 | 2: 537 |
| AFAD Arama ve Kurtarma Teknisyeni Sayısına Yönelik İddialar - B | AFAD                            | 1 | 1 | 1 | 2: 534 | 2: 537 |
| AFAD Arama ve Kurtarma Teknisyeni Sayısına Yönelik İddialar - B | Coordination\Information        | 1 | 1 | 1 | 2: 579 | 2: 590 |
| AFAD Arama ve Kurtarma Teknisyeni Sayısına Yönelik İddialar - B | Coordination\Information        | 1 | 1 | 1 | 2: 579 | 2: 590 |
| AFAD Arama ve Kurtarma Teknisyeni Sayısına Yönelik İddialar - B | Recovery\Peacemaking            | 1 | 1 | 1 | 2: 595 | 2: 604 |
| AFAD Arama ve Kurtarma Teknisyeni Sayısına Yönelik İddialar - B | Recovery\Peacemaking            | 1 | 1 | 1 | 2: 595 | 2: 604 |
| AFAD Arama ve Kurtarma Teknisyeni Sayısına Yönelik İddialar - B | Coordination\Social media       | 1 | 0 | 0 | 2: 651 | 2: 662 |
| AFAD Arama ve Kurtarma Teknisyeni Sayısına Yönelik İddialar - B | Coordination\Social media usage | 0 | 1 | 0 | 2: 651 | 2: 662 |
| AFAD Arama ve Kurtarma Teknisyeni Sayısına Yönelik İddialar - B | Disaster                        | 1 | 1 | 1 | 2: 788 | 2: 791 |
| AFAD Arama ve Kurtarma Teknisyeni Sayısına Yönelik İddialar - B | Disaster                        | 1 | 1 | 1 | 2: 788 | 2: 791 |
| AFAD Arama ve Kurtarma Teknisyeni Sayısına Yönelik İddialar - B | Emergency                       | 1 | 1 | 1 | 2: 796 | 2: 805 |
| AFAD Arama ve Kurtarma Teknisyeni Sayısına Yönelik İddialar - B | Emergency                       | 1 | 1 | 1 | 2: 796 | 2: 805 |
| AFAD'ın Vinç Ticaretine Göz Yumduğu İddiası Hk_                 | AFAD                            | 1 | 1 | 1 | 1: 17  | 1: 20  |
| AFAD'ın Vinç Ticaretine Göz Yumduğu İddiası Hk_                 | AFAD                            | 1 | 1 | 1 | 1: 17  | 1: 20  |
| AFAD'ın Vinç Ticaretine Göz Yumduğu İddiası Hk_                 | AFAD                            | 1 | 1 | 1 | 1: 78  | 1: 81  |
| AFAD'ın Vinç Ticaretine Göz Yumduğu İddiası Hk_                 | AFAD                            | 1 | 1 | 1 | 1: 78  | 1: 81  |

|                                                       |                             |   |   |   |         |         |
|-------------------------------------------------------|-----------------------------|---|---|---|---------|---------|
| AFAD'ın Vinç<br>Ticaretine Göz<br>Yumduğu İddiası Hk_ | AFAD                        | 1 | 1 | 1 | 1: 90   | 1: 93   |
| AFAD'ın Vinç<br>Ticaretine Göz<br>Yumduğu İddiası Hk_ | AFAD                        | 1 | 1 | 1 | 1: 90   | 1: 93   |
| AFAD'ın Vinç<br>Ticaretine Göz<br>Yumduğu İddiası Hk_ | AFAD                        | 1 | 1 | 1 | 1: 141  | 1: 144  |
| AFAD'ın Vinç<br>Ticaretine Göz<br>Yumduğu İddiası Hk_ | AFAD                        | 1 | 1 | 1 | 1: 141  | 1: 144  |
| AFAD'ın Vinç<br>Ticaretine Göz<br>Yumduğu İddiası Hk_ | AFAD                        | 1 | 1 | 1 | 1: 227  | 1: 230  |
| AFAD'ın Vinç<br>Ticaretine Göz<br>Yumduğu İddiası Hk_ | AFAD                        | 1 | 1 | 1 | 1: 227  | 1: 230  |
| AFAD'ın Vinç<br>Ticaretine Göz<br>Yumduğu İddiası Hk_ | AFAD                        | 1 | 1 | 1 | 1: 310  | 1: 313  |
| AFAD'ın Vinç<br>Ticaretine Göz<br>Yumduğu İddiası Hk_ | AFAD                        | 1 | 1 | 1 | 1: 310  | 1: 313  |
| AFAD'ın Vinç<br>Ticaretine Göz<br>Yumduğu İddiası Hk_ | Coordination\Disinformation | 1 | 1 | 1 | 1: 611  | 1: 624  |
| AFAD'ın Vinç<br>Ticaretine Göz<br>Yumduğu İddiası Hk_ | Coordination\Disinformation | 1 | 1 | 1 | 1: 611  | 1: 624  |
| AFAD'ın Vinç<br>Ticaretine Göz<br>Yumduğu İddiası Hk_ | Earthquake                  | 1 | 1 | 1 | 1: 707  | 1: 712  |
| AFAD'ın Vinç<br>Ticaretine Göz<br>Yumduğu İddiası Hk_ | Earthquake                  | 1 | 1 | 1 | 1: 707  | 1: 712  |
| AFAD'ın Vinç<br>Ticaretine Göz<br>Yumduğu İddiası Hk_ | Disaster                    | 1 | 1 | 1 | 1: 725  | 1: 728  |
| AFAD'ın Vinç<br>Ticaretine Göz<br>Yumduğu İddiası Hk_ | Disaster                    | 1 | 1 | 1 | 1: 725  | 1: 728  |
| AFAD'ın Vinç<br>Ticaretine Göz<br>Yumduğu İddiası Hk_ | Disaster                    | 1 | 1 | 1 | 1: 869  | 1: 872  |
| AFAD'ın Vinç<br>Ticaretine Göz<br>Yumduğu İddiası Hk_ | Disaster                    | 1 | 1 | 1 | 1: 869  | 1: 872  |
| AFAD'ın Vinç<br>Ticaretine Göz<br>Yumduğu İddiası Hk_ | Disaster                    | 1 | 1 | 1 | 1: 1025 | 1: 1028 |
| AFAD'ın Vinç<br>Ticaretine Göz<br>Yumduğu İddiası Hk_ | Disaster                    | 1 | 1 | 1 | 1: 1025 | 1: 1028 |
| AFAD'ın Vinç<br>Ticaretine Göz<br>Yumduğu İddiası Hk_ | Disaster                    | 1 | 1 | 1 | 1: 1672 | 1: 1675 |
| AFAD'ın Vinç<br>Ticaretine Göz<br>Yumduğu İddiası Hk_ | Disaster                    | 1 | 1 | 1 | 1: 1672 | 1: 1675 |

|                                                       |                               |   |   |   |         |         |
|-------------------------------------------------------|-------------------------------|---|---|---|---------|---------|
| AFAD'ın Vinç<br>Ticaretine Göz<br>Yumduğu İddiası Hk_ | Coordination\Public relations | 1 | 1 | 1 | 1: 1721 | 1: 1726 |
| AFAD'ın Vinç<br>Ticaretine Göz<br>Yumduğu İddiası Hk_ | Coordination\Public relations | 1 | 1 | 1 | 1: 1721 | 1: 1726 |
| AFAD'ın Vinç<br>Ticaretine Göz<br>Yumduğu İddiası Hk_ | AFAD                          | 1 | 1 | 1 | 1: 1761 | 1: 1764 |
| AFAD'ın Vinç<br>Ticaretine Göz<br>Yumduğu İddiası Hk_ | AFAD                          | 1 | 1 | 1 | 1: 1761 | 1: 1764 |
| AFAD'ın Vinç<br>Ticaretine Göz<br>Yumduğu İddiası Hk_ | AFAD                          | 1 | 1 | 1 | 1: 1819 | 1: 1822 |
| AFAD'ın Vinç<br>Ticaretine Göz<br>Yumduğu İddiası Hk_ | AFAD                          | 1 | 1 | 1 | 1: 1819 | 1: 1822 |
| AFAD'ın Vinç<br>Ticaretine Göz<br>Yumduğu İddiası Hk_ | Response\Search&Rescue        | 1 | 1 | 1 | 1: 2001 | 1: 2014 |
| AFAD'ın Vinç<br>Ticaretine Göz<br>Yumduğu İddiası Hk_ | Response\Search&Rescue        | 1 | 1 | 1 | 1: 2001 | 1: 2014 |
| AFAD'ın Vinç<br>Ticaretine Göz<br>Yumduğu İddiası Hk_ | Disaster                      | 1 | 1 | 1 | 1: 2065 | 1: 2068 |
| AFAD'ın Vinç<br>Ticaretine Göz<br>Yumduğu İddiası Hk_ | Disaster                      | 1 | 1 | 1 | 1: 2065 | 1: 2068 |
| AFAD'ın Vinç<br>Ticaretine Göz<br>Yumduğu İddiası Hk_ | AFAD                          | 1 | 1 | 1 | 1: 2083 | 1: 2086 |
| AFAD'ın Vinç<br>Ticaretine Göz<br>Yumduğu İddiası Hk_ | AFAD                          | 1 | 1 | 1 | 1: 2083 | 1: 2086 |
| AFAD'ın Vinç<br>Ticaretine Göz<br>Yumduğu İddiası Hk_ | Preparedness\Preparedness     | 1 | 1 | 1 | 1: 2166 | 1: 2176 |
| AFAD'ın Vinç<br>Ticaretine Göz<br>Yumduğu İddiası Hk_ | Preparedness\Preparedness     | 1 | 1 | 1 | 1: 2166 | 1: 2176 |
| AFAD'ın Vinç<br>Ticaretine Göz<br>Yumduğu İddiası Hk_ | Disaster                      | 1 | 1 | 1 | 1: 2166 | 1: 2169 |
| AFAD'ın Vinç<br>Ticaretine Göz<br>Yumduğu İddiası Hk_ | Disaster                      | 1 | 1 | 1 | 1: 2166 | 1: 2169 |
| AFAD'ın Vinç<br>Ticaretine Göz<br>Yumduğu İddiası Hk_ | Recovery\Fund drive           | 1 | 1 | 1 | 1: 2255 | 1: 2273 |
| AFAD'ın Vinç<br>Ticaretine Göz<br>Yumduğu İddiası Hk_ | Recovery\Fund drive           | 1 | 1 | 1 | 1: 2255 | 1: 2273 |
| AFAD'ın Vinç<br>Ticaretine Göz<br>Yumduğu İddiası Hk_ | AFAD                          | 1 | 1 | 1 | 2: 17   | 2: 20   |
| AFAD'ın Vinç<br>Ticaretine Göz<br>Yumduğu İddiası Hk_ | AFAD                          | 1 | 1 | 1 | 2: 17   | 2: 20   |

|                                                       |                                 |   |   |   |        |        |
|-------------------------------------------------------|---------------------------------|---|---|---|--------|--------|
| AFAD'ın Vinç<br>Ticaretine Göz<br>Yumduğu İddiası Hk_ | AFAD                            | 1 | 1 | 1 | 2: 78  | 2: 81  |
| AFAD'ın Vinç<br>Ticaretine Göz<br>Yumduğu İddiası Hk_ | AFAD                            | 1 | 1 | 1 | 2: 78  | 2: 81  |
| AFAD'ın Vinç<br>Ticaretine Göz<br>Yumduğu İddiası Hk_ | AFAD                            | 1 | 1 | 1 | 2: 90  | 2: 93  |
| AFAD'ın Vinç<br>Ticaretine Göz<br>Yumduğu İddiası Hk_ | AFAD                            | 1 | 1 | 1 | 2: 90  | 2: 93  |
| AFAD'ın Vinç<br>Ticaretine Göz<br>Yumduğu İddiası Hk_ | AFAD                            | 1 | 1 | 1 | 2: 160 | 2: 163 |
| AFAD'ın Vinç<br>Ticaretine Göz<br>Yumduğu İddiası Hk_ | AFAD                            | 1 | 1 | 1 | 2: 160 | 2: 163 |
| AFAD'ın Vinç<br>Ticaretine Göz<br>Yumduğu İddiası Hk_ | Disaster                        | 1 | 1 | 1 | 2: 185 | 2: 188 |
| AFAD'ın Vinç<br>Ticaretine Göz<br>Yumduğu İddiası Hk_ | Disaster                        | 1 | 1 | 1 | 2: 185 | 2: 188 |
| AFAD'ın Vinç<br>Ticaretine Göz<br>Yumduğu İddiası Hk_ | Coordination\Social media       | 1 | 0 | 0 | 2: 266 | 2: 277 |
| AFAD'ın Vinç<br>Ticaretine Göz<br>Yumduğu İddiası Hk_ | Coordination\Social media usage | 0 | 1 | 0 | 2: 266 | 2: 277 |
| AFAD'ın Vinç<br>Ticaretine Göz<br>Yumduğu İddiası Hk_ | AFAD                            | 1 | 1 | 1 | 2: 322 | 2: 325 |
| AFAD'ın Vinç<br>Ticaretine Göz<br>Yumduğu İddiası Hk_ | AFAD                            | 1 | 1 | 1 | 2: 322 | 2: 325 |
| AFAD'ın Vinç<br>Ticaretine Göz<br>Yumduğu İddiası Hk_ | AFAD                            | 1 | 1 | 1 | 2: 344 | 2: 347 |
| AFAD'ın Vinç<br>Ticaretine Göz<br>Yumduğu İddiası Hk_ | AFAD                            | 1 | 1 | 1 | 2: 344 | 2: 347 |
| AFAD'ın Vinç<br>Ticaretine Göz<br>Yumduğu İddiası Hk_ | Coordination\Information        | 1 | 1 | 1 | 2: 389 | 2: 400 |
| AFAD'ın Vinç<br>Ticaretine Göz<br>Yumduğu İddiası Hk_ | Coordination\Information        | 1 | 1 | 1 | 2: 389 | 2: 400 |
| AFAD'ın Vinç<br>Ticaretine Göz<br>Yumduğu İddiası Hk_ | Recovery\Peacemaking            | 1 | 1 | 1 | 2: 405 | 2: 414 |
| AFAD'ın Vinç<br>Ticaretine Göz<br>Yumduğu İddiası Hk_ | Recovery\Peacemaking            | 1 | 1 | 1 | 2: 405 | 2: 414 |
| AFAD'ın Vinç<br>Ticaretine Göz<br>Yumduğu İddiası Hk_ | Coordination\Social media       | 1 | 0 | 0 | 2: 461 | 2: 472 |
| AFAD'ın Vinç<br>Ticaretine Göz<br>Yumduğu İddiası Hk_ | Coordination\Social media usage | 0 | 1 | 0 | 2: 461 | 2: 472 |

|                                                                          |            |   |   |   |        |        |
|--------------------------------------------------------------------------|------------|---|---|---|--------|--------|
| AFAD'ın Vinç<br>Ticaretine Göz<br>Yumduğu İddiası Hk_                    | Disaster   | 1 | 1 | 1 | 2: 598 | 2: 601 |
| AFAD'ın Vinç<br>Ticaretine Göz<br>Yumduğu İddiası Hk_                    | Disaster   | 1 | 1 | 1 | 2: 598 | 2: 601 |
| AFAD'ın Vinç<br>Ticaretine Göz<br>Yumduğu İddiası Hk_                    | Emergency  | 1 | 1 | 1 | 2: 606 | 2: 615 |
| AFAD'ın Vinç<br>Ticaretine Göz<br>Yumduğu İddiası Hk_                    | Emergency  | 1 | 1 | 1 | 2: 606 | 2: 615 |
| Hatay Defne<br>Merkezli Deprem<br>Sonrası Çalışmalar-<br>Basın Bülteni-2 | Earthquake | 1 | 1 | 1 | 1: 38  | 1: 43  |
| Hatay Defne<br>Merkezli Deprem<br>Sonrası Çalışmalar-<br>Basın Bülteni-2 | Earthquake | 1 | 1 | 1 | 1: 38  | 1: 43  |
| Hatay Defne<br>Merkezli Deprem<br>Sonrası Çalışmalar-<br>Basın Bülteni-2 | AFAD       | 1 | 1 | 1 | 1: 93  | 1: 96  |
| Hatay Defne<br>Merkezli Deprem<br>Sonrası Çalışmalar-<br>Basın Bülteni-2 | AFAD       | 1 | 1 | 1 | 1: 93  | 1: 96  |
| Hatay Defne<br>Merkezli Deprem<br>Sonrası Çalışmalar-<br>Basın Bülteni-2 | Earthquake | 1 | 1 | 1 | 1: 126 | 1: 131 |
| Hatay Defne<br>Merkezli Deprem<br>Sonrası Çalışmalar-<br>Basın Bülteni-2 | Earthquake | 1 | 1 | 1 | 1: 126 | 1: 131 |
| Hatay Defne<br>Merkezli Deprem<br>Sonrası Çalışmalar-<br>Basın Bülteni-2 | Earthquake | 1 | 1 | 1 | 1: 192 | 1: 197 |
| Hatay Defne<br>Merkezli Deprem<br>Sonrası Çalışmalar-<br>Basın Bülteni-2 | Earthquake | 1 | 1 | 1 | 1: 192 | 1: 197 |
| Hatay Defne<br>Merkezli Deprem<br>Sonrası Çalışmalar-<br>Basın Bülteni-2 | Earthquake | 1 | 1 | 1 | 1: 326 | 1: 331 |
| Hatay Defne<br>Merkezli Deprem<br>Sonrası Çalışmalar-<br>Basın Bülteni-2 | Earthquake | 1 | 1 | 1 | 1: 326 | 1: 331 |
| Hatay Defne<br>Merkezli Deprem<br>Sonrası Çalışmalar-<br>Basın Bülteni-2 | Earthquake | 1 | 1 | 1 | 1: 413 | 1: 418 |
| Hatay Defne<br>Merkezli Deprem<br>Sonrası Çalışmalar-<br>Basın Bülteni-2 | Earthquake | 1 | 1 | 1 | 1: 413 | 1: 418 |
| Hatay Defne<br>Merkezli Deprem<br>Sonrası Çalışmalar-<br>Basın Bülteni-2 | Earthquake | 1 | 1 | 1 | 1: 491 | 1: 496 |
| Hatay Defne<br>Merkezli Deprem<br>Sonrası Çalışmalar-<br>Basın Bülteni-2 | Earthquake | 1 | 1 | 1 | 1: 491 | 1: 496 |
| Hatay Defne<br>Merkezli Deprem<br>Sonrası Çalışmalar-<br>Basın Bülteni-2 | AFAD       | 1 | 1 | 1 | 1: 674 | 1: 677 |
| Hatay Defne<br>Merkezli Deprem<br>Sonrası Çalışmalar-<br>Basın Bülteni-2 | AFAD       | 1 | 1 | 1 | 1: 674 | 1: 677 |

|                                                                          |                                 |   |   |   |         |         |
|--------------------------------------------------------------------------|---------------------------------|---|---|---|---------|---------|
| Hatay Defne<br>Merkezli Deprem<br>Sonrası Çalışmalar-<br>Basın Bülteni-2 | Response\Search&Rescue          | 1 | 1 | 1 | 1: 898  | 1: 911  |
| Hatay Defne<br>Merkezli Deprem<br>Sonrası Çalışmalar-<br>Basın Bülteni-2 | Response\Search&Rescue          | 1 | 1 | 1 | 1: 898  | 1: 911  |
| Hatay Defne<br>Merkezli Deprem<br>Sonrası Çalışmalar-<br>Basın Bülteni-2 | Earthquake                      | 1 | 1 | 1 | 1: 1232 | 1: 1237 |
| Hatay Defne<br>Merkezli Deprem<br>Sonrası Çalışmalar-<br>Basın Bülteni-2 | Earthquake                      | 1 | 1 | 1 | 1: 1232 | 1: 1237 |
| Hatay Defne<br>Merkezli Deprem<br>Sonrası Çalışmalar-<br>Basın Bülteni-2 | Shelter&meal\Tent               | 1 | 1 | 1 | 1: 1303 | 1: 1307 |
| Hatay Defne<br>Merkezli Deprem<br>Sonrası Çalışmalar-<br>Basın Bülteni-2 | Shelter&meal\Tent               | 1 | 1 | 1 | 1: 1303 | 1: 1307 |
| Hatay Defne<br>Merkezli Deprem<br>Sonrası Çalışmalar-<br>Basın Bülteni-2 | Shelter&meal\Tent               | 1 | 1 | 1 | 1: 1333 | 1: 1337 |
| Hatay Defne<br>Merkezli Deprem<br>Sonrası Çalışmalar-<br>Basın Bülteni-2 | Shelter&meal\Tent               | 1 | 1 | 1 | 1: 1333 | 1: 1337 |
| Hatay Defne<br>Merkezli Deprem<br>Sonrası Çalışmalar-<br>Basın Bülteni-2 | Disaster                        | 1 | 1 | 1 | 1: 1558 | 1: 1561 |
| Hatay Defne<br>Merkezli Deprem<br>Sonrası Çalışmalar-<br>Basın Bülteni-2 | Disaster                        | 1 | 1 | 1 | 1: 1558 | 1: 1561 |
| Hatay Defne<br>Merkezli Deprem<br>Sonrası Çalışmalar-<br>Basın Bülteni-2 | Coordination\Public relations   | 1 | 1 | 1 | 1: 1687 | 1: 1692 |
| Hatay Defne<br>Merkezli Deprem<br>Sonrası Çalışmalar-<br>Basın Bülteni-2 | Coordination\Public relations   | 1 | 1 | 1 | 1: 1687 | 1: 1692 |
| Hatay Defne<br>Merkezli Deprem<br>Sonrası Çalışmalar-<br>Basın Bülteni-2 | Coordination\Social media       | 1 | 0 | 0 | 1: 1785 | 1: 1796 |
| Hatay Defne<br>Merkezli Deprem<br>Sonrası Çalışmalar-<br>Basın Bülteni-2 | Coordination\Social media usage | 0 | 1 | 0 | 1: 1785 | 1: 1796 |
| Hatay Defne<br>Merkezli Deprem<br>Sonrası Çalışmalar-<br>Basın Bülteni-2 | Earthquake                      | 1 | 1 | 1 | 2: 38   | 2: 43   |
| Hatay Defne<br>Merkezli Deprem<br>Sonrası Çalışmalar-<br>Basın Bülteni-2 | Earthquake                      | 1 | 1 | 1 | 2: 38   | 2: 43   |
| Hatay Defne<br>Merkezli Deprem<br>Sonrası Çalışmalar-<br>Basın Bülteni-2 | AFAD                            | 1 | 1 | 1 | 2: 93   | 2: 96   |
| Hatay Defne<br>Merkezli Deprem<br>Sonrası Çalışmalar-<br>Basın Bülteni-2 | AFAD                            | 1 | 1 | 1 | 2: 93   | 2: 96   |
| Hatay Defne<br>Merkezli Deprem<br>Sonrası Çalışmalar-<br>Basın Bülteni-2 | Earthquake                      | 1 | 1 | 1 | 2: 126  | 2: 131  |
| Hatay Defne<br>Merkezli Deprem<br>Sonrası Çalışmalar-<br>Basın Bülteni-2 | Earthquake                      | 1 | 1 | 1 | 2: 126  | 2: 131  |

|                                                                             |            |   |   |   |        |        |
|-----------------------------------------------------------------------------|------------|---|---|---|--------|--------|
| Hatay Defne<br>Merkezli Deprem<br>Sonrası Çalışmalar-<br>Basın Bülteni-2    | Disaster   | 1 | 1 | 1 | 2: 202 | 2: 205 |
| Hatay Defne<br>Merkezli Deprem<br>Sonrası Çalışmalar-<br>Basın Bülteni-2    | Disaster   | 1 | 1 | 1 | 2: 202 | 2: 205 |
| Hatay Defne<br>Merkezli Deprem<br>Sonrası Çalışmalar-<br>Basın Bülteni-2    | Emergency  | 1 | 1 | 1 | 2: 210 | 2: 219 |
| Hatay Defne<br>Merkezli Deprem<br>Sonrası Çalışmalar-<br>Basın Bülteni-2    | Emergency  | 1 | 1 | 1 | 2: 210 | 2: 219 |
| Hatay'da Meydana<br>Gelen 6.4<br>Büyüklüğündeki<br>Deprem Hk. Basın<br>Riit | Earthquake | 1 | 1 | 1 | 1: 59  | 1: 64  |
| Hatay'da Meydana<br>Gelen 6.4<br>Büyüklüğündeki<br>Deprem Hk. Basın<br>Riit | Earthquake | 1 | 1 | 1 | 1: 59  | 1: 64  |
| Hatay'da Meydana<br>Gelen 6.4<br>Büyüklüğündeki<br>Deprem Hk. Basın<br>Riit | AFAD       | 1 | 1 | 1 | 1: 99  | 1: 102 |
| Hatay'da Meydana<br>Gelen 6.4<br>Büyüklüğündeki<br>Deprem Hk. Basın<br>Riit | AFAD       | 1 | 1 | 1 | 1: 99  | 1: 102 |
| Hatay'da Meydana<br>Gelen 6.4<br>Büyüklüğündeki<br>Deprem Hk. Basın<br>Riit | Earthquake | 1 | 1 | 1 | 1: 151 | 1: 156 |
| Hatay'da Meydana<br>Gelen 6.4<br>Büyüklüğündeki<br>Deprem Hk. Basın<br>Riit | Earthquake | 1 | 1 | 1 | 1: 151 | 1: 156 |
| Hatay'da Meydana<br>Gelen 6.4<br>Büyüklüğündeki<br>Deprem Hk. Basın<br>Riit | Earthquake | 1 | 1 | 1 | 1: 224 | 1: 229 |
| Hatay'da Meydana<br>Gelen 6.4<br>Büyüklüğündeki<br>Deprem Hk. Basın<br>Riit | Earthquake | 1 | 1 | 1 | 1: 224 | 1: 229 |
| Hatay'da Meydana<br>Gelen 6.4<br>Büyüklüğündeki<br>Deprem Hk. Basın<br>Riit | Earthquake | 1 | 1 | 1 | 1: 362 | 1: 367 |
| Hatay'da Meydana<br>Gelen 6.4<br>Büyüklüğündeki<br>Deprem Hk. Basın<br>Riit | Earthquake | 1 | 1 | 1 | 1: 362 | 1: 367 |
| Hatay'da Meydana<br>Gelen 6.4<br>Büyüklüğündeki<br>Deprem Hk. Basın<br>Riit | Earthquake | 1 | 1 | 1 | 1: 435 | 1: 440 |
| Hatay'da Meydana<br>Gelen 6.4<br>Büyüklüğündeki<br>Deprem Hk. Basın<br>Riit | Earthquake | 1 | 1 | 1 | 1: 435 | 1: 440 |
| Hatay'da Meydana<br>Gelen 6.4<br>Büyüklüğündeki<br>Deprem Hk. Basın<br>Riit | Earthquake | 1 | 1 | 1 | 1: 461 | 1: 466 |



|                                                                  |                                 |   |   |   |         |         |
|------------------------------------------------------------------|---------------------------------|---|---|---|---------|---------|
| Hatay'da Meydana Gelen 6.4 Büyüklüğündeki Deprem Hk. Basın Riiit | Earthquake                      | 1 | 1 | 1 | 1: 461  | 1: 466  |
| Hatay'da Meydana Gelen 6.4 Büyüklüğündeki Deprem Hk. Basın Riiit | Earthquake                      | 1 | 1 | 1 | 1: 514  | 1: 519  |
| Hatay'da Meydana Gelen 6.4 Büyüklüğündeki Deprem Hk. Basın Riiit | Earthquake                      | 1 | 1 | 1 | 1: 514  | 1: 519  |
| Hatay'da Meydana Gelen 6.4 Büyüklüğündeki Deprem Hk. Basın Riiit | Earthquake                      | 1 | 1 | 1 | 1: 535  | 1: 540  |
| Hatay'da Meydana Gelen 6.4 Büyüklüğündeki Deprem Hk. Basın Riiit | Earthquake                      | 1 | 1 | 1 | 1: 535  | 1: 540  |
| Hatay'da Meydana Gelen 6.4 Büyüklüğündeki Deprem Hk. Basın Riiit | AFAD                            | 1 | 1 | 1 | 1: 834  | 1: 837  |
| Hatay'da Meydana Gelen 6.4 Büyüklüğündeki Deprem Hk. Basın Riiit | AFAD                            | 1 | 1 | 1 | 1: 834  | 1: 837  |
| Hatay'da Meydana Gelen 6.4 Büyüklüğündeki Deprem Hk. Basın Riiit | Disaster                        | 1 | 1 | 1 | 1: 1224 | 1: 1227 |
| Hatay'da Meydana Gelen 6.4 Büyüklüğündeki Deprem Hk. Basın Riiit | Disaster                        | 1 | 1 | 1 | 1: 1224 | 1: 1227 |
| Hatay'da Meydana Gelen 6.4 Büyüklüğündeki Deprem Hk. Basın Riiit | Coordination\Public relations   | 1 | 1 | 1 | 1: 1273 | 1: 1278 |
| Hatay'da Meydana Gelen 6.4 Büyüklüğündeki Deprem Hk. Basın Riiit | Coordination\Public relations   | 1 | 1 | 1 | 1: 1273 | 1: 1278 |
| Hatay'da Meydana Gelen 6.4 Büyüklüğündeki Deprem Hk. Basın Riiit | Coordination\Social media       | 1 | 0 | 0 | 1: 1371 | 1: 1382 |
| Hatay'da Meydana Gelen 6.4 Büyüklüğündeki Deprem Hk. Basın Riiit | Coordination\Social media usage | 0 | 1 | 0 | 1: 1371 | 1: 1382 |
| Hatay'da Meydana Gelen 6.4 Büyüklüğündeki Deprem Hk. Basın Riiit | Disaster                        | 1 | 1 | 1 | 1: 1508 | 1: 1511 |
| Hatay'da Meydana Gelen 6.4 Büyüklüğündeki Deprem Hk. Basın Riiit | Disaster                        | 1 | 1 | 1 | 1: 1508 | 1: 1511 |
| Hatay'da Meydana Gelen 6.4 Büyüklüğündeki Deprem Hk. Basın Riiit | Emergency                       | 1 | 1 | 1 | 1: 1516 | 1: 1525 |

|                                                                    |                        |   |   |   |         |         |
|--------------------------------------------------------------------|------------------------|---|---|---|---------|---------|
| Hatay'da Meydana Gelen 6.4 Büyüklüğündeki Deprem Hk. Basın Bülteni | Emergency              | 1 | 1 | 1 | 1: 1516 | 1: 1525 |
| Kahramanmaraş Merkezli Yürütülen Çalışmalar Hakkında - 37          | Kahramanmaraş          | 1 | 0 | 0 | 1: 17   | 1: 29   |
| Kahramanmaraş Merkezli Yürütülen Çalışmalar Hakkında - 37          | Pazarcık               | 0 | 1 | 0 | 1: 17   | 1: 29   |
| Kahramanmaraş Merkezli Yürütülen Çalışmalar Hakkında - 37          | AFAD                   | 1 | 1 | 1 | 1: 102  | 1: 105  |
| Kahramanmaraş Merkezli Yürütülen Çalışmalar Hakkında - 37          | AFAD                   | 1 | 1 | 1 | 1: 102  | 1: 105  |
| Kahramanmaraş Merkezli Yürütülen Çalışmalar Hakkında - 37          | Kahramanmaraş          | 1 | 0 | 0 | 1: 191  | 1: 203  |
| Kahramanmaraş Merkezli Yürütülen Çalışmalar Hakkında - 37          | Pazarcık               | 0 | 1 | 0 | 1: 191  | 1: 203  |
| Kahramanmaraş Merkezli Yürütülen Çalışmalar Hakkında - 37          | Kahramanmaraş          | 1 | 0 | 0 | 1: 314  | 1: 326  |
| Kahramanmaraş Merkezli Yürütülen Çalışmalar Hakkında - 37          | Pazarcık               | 0 | 1 | 0 | 1: 314  | 1: 326  |
| Kahramanmaraş Merkezli Yürütülen Çalışmalar Hakkında - 37          | Earthquake             | 1 | 1 | 1 | 1: 337  | 1: 342  |
| Kahramanmaraş Merkezli Yürütülen Çalışmalar Hakkında - 37          | Earthquake             | 1 | 1 | 1 | 1: 337  | 1: 342  |
| Kahramanmaraş Merkezli Yürütülen Çalışmalar Hakkında - 37          | Kahramanmaraş          | 1 | 0 | 0 | 1: 408  | 1: 420  |
| Kahramanmaraş Merkezli Yürütülen Çalışmalar Hakkında - 37          | Pazarcık               | 0 | 1 | 0 | 1: 408  | 1: 420  |
| Kahramanmaraş Merkezli Yürütülen Çalışmalar Hakkında - 37          | Earthquake             | 1 | 1 | 1 | 1: 492  | 1: 497  |
| Kahramanmaraş Merkezli Yürütülen Çalışmalar Hakkında - 37          | Earthquake             | 1 | 1 | 1 | 1: 492  | 1: 497  |
| Kahramanmaraş Merkezli Yürütülen Çalışmalar Hakkında - 37          | Response\Search&Rescue | 1 | 1 | 1 | 1: 540  | 1: 553  |
| Kahramanmaraş Merkezli Yürütülen Çalışmalar Hakkında - 37          | Response\Search&Rescue | 1 | 1 | 1 | 1: 540  | 1: 553  |
| Kahramanmaraş Merkezli Yürütülen Çalışmalar Hakkında - 37          | Earthquake             | 1 | 1 | 1 | 1: 655  | 1: 660  |
| Kahramanmaraş Merkezli Yürütülen Çalışmalar Hakkında - 37          | Earthquake             | 1 | 1 | 1 | 1: 655  | 1: 660  |
| Kahramanmaraş Merkezli Yürütülen Çalışmalar Hakkında - 37          | Shelter&meal\Tent      | 1 | 1 | 1 | 1: 688  | 1: 692  |

|                                                           |                         |   |   |   |         |         |
|-----------------------------------------------------------|-------------------------|---|---|---|---------|---------|
| Kahramanmaraş Merkezli Yürütülen Çalışmalar Hakkında - 37 | Shelter&meal\Tent       | 1 | 1 | 1 | 1: 688  | 1: 692  |
| Kahramanmaraş Merkezli Yürütülen Çalışmalar Hakkında - 37 | Shelter&meal\Tent       | 1 | 1 | 1 | 1: 708  | 1: 712  |
| Kahramanmaraş Merkezli Yürütülen Çalışmalar Hakkında - 37 | Shelter&meal\Tent       | 1 | 1 | 1 | 1: 708  | 1: 712  |
| Kahramanmaraş Merkezli Yürütülen Çalışmalar Hakkında - 37 | Shelter&meal\Tent       | 1 | 1 | 1 | 1: 727  | 1: 731  |
| Kahramanmaraş Merkezli Yürütülen Çalışmalar Hakkında - 37 | Shelter&meal\Tent       | 1 | 1 | 1 | 1: 727  | 1: 731  |
| Kahramanmaraş Merkezli Yürütülen Çalışmalar Hakkında - 37 | Shelter&meal\Sheltering | 1 | 1 | 1 | 1: 738  | 1: 744  |
| Kahramanmaraş Merkezli Yürütülen Çalışmalar Hakkında - 37 | Shelter&meal\Sheltering | 1 | 1 | 1 | 1: 738  | 1: 744  |
| Kahramanmaraş Merkezli Yürütülen Çalışmalar Hakkında - 37 | Shelter&meal\Container  | 1 | 1 | 1 | 1: 817  | 1: 825  |
| Kahramanmaraş Merkezli Yürütülen Çalışmalar Hakkında - 37 | Shelter&meal\Container  | 1 | 1 | 1 | 1: 817  | 1: 825  |
| Kahramanmaraş Merkezli Yürütülen Çalışmalar Hakkında - 37 | Shelter&meal\Container  | 1 | 1 | 1 | 1: 872  | 1: 880  |
| Kahramanmaraş Merkezli Yürütülen Çalışmalar Hakkında - 37 | Shelter&meal\Container  | 1 | 1 | 1 | 1: 872  | 1: 880  |
| Kahramanmaraş Merkezli Yürütülen Çalışmalar Hakkında - 37 | Shelter&meal\Container  | 1 | 1 | 1 | 1: 937  | 1: 945  |
| Kahramanmaraş Merkezli Yürütülen Çalışmalar Hakkında - 37 | Shelter&meal\Container  | 1 | 1 | 1 | 1: 937  | 1: 945  |
| Kahramanmaraş Merkezli Yürütülen Çalışmalar Hakkında - 37 | Shelter&meal\Sheltering | 1 | 1 | 1 | 1: 952  | 1: 958  |
| Kahramanmaraş Merkezli Yürütülen Çalışmalar Hakkında - 37 | Shelter&meal\Sheltering | 1 | 1 | 1 | 1: 952  | 1: 958  |
| Kahramanmaraş Merkezli Yürütülen Çalışmalar Hakkında - 37 | Shelter&meal\Sheltering | 1 | 1 | 1 | 1: 1014 | 1: 1020 |
| Kahramanmaraş Merkezli Yürütülen Çalışmalar Hakkında - 37 | Shelter&meal\Sheltering | 1 | 1 | 1 | 1: 1014 | 1: 1020 |
| Kahramanmaraş Merkezli Yürütülen Çalışmalar Hakkında - 37 | Shelter&meal\Container  | 1 | 1 | 1 | 1: 1075 | 1: 1083 |
| Kahramanmaraş Merkezli Yürütülen Çalışmalar Hakkında - 37 | Shelter&meal\Container  | 1 | 1 | 1 | 1: 1075 | 1: 1083 |
| Kahramanmaraş Merkezli Yürütülen Çalışmalar Hakkında - 37 | Earthquake              | 1 | 1 | 1 | 1: 1109 | 1: 1114 |

|                                                           |                          |   |   |   |         |         |
|-----------------------------------------------------------|--------------------------|---|---|---|---------|---------|
| Kahramanmaraş Merkezli Yürütülen Çalışmalar Hakkında - 37 | Earthquake               | 1 | 1 | 1 | 1: 1109 | 1: 1114 |
| Kahramanmaraş Merkezli Yürütülen Çalışmalar Hakkında - 37 | Shelter&meal\Sheltering  | 1 | 1 | 1 | 1: 1138 | 1: 1144 |
| Kahramanmaraş Merkezli Yürütülen Çalışmalar Hakkında - 37 | Shelter&meal\Sheltering  | 1 | 1 | 1 | 1: 1138 | 1: 1144 |
| Kahramanmaraş Merkezli Yürütülen Çalışmalar Hakkında - 37 | Disaster                 | 1 | 1 | 1 | 1: 1233 | 1: 1236 |
| Kahramanmaraş Merkezli Yürütülen Çalışmalar Hakkında - 37 | Disaster                 | 1 | 1 | 1 | 1: 1233 | 1: 1236 |
| Kahramanmaraş Merkezli Yürütülen Çalışmalar Hakkında - 37 | Shelter&meal\Sheltering  | 1 | 1 | 1 | 1: 1279 | 1: 1285 |
| Kahramanmaraş Merkezli Yürütülen Çalışmalar Hakkında - 37 | Shelter&meal\Sheltering  | 1 | 1 | 1 | 1: 1279 | 1: 1285 |
| Kahramanmaraş Merkezli Yürütülen Çalışmalar Hakkında - 37 | Earthquake               | 1 | 1 | 1 | 1: 1312 | 1: 1317 |
| Kahramanmaraş Merkezli Yürütülen Çalışmalar Hakkında - 37 | Earthquake               | 1 | 1 | 1 | 1: 1312 | 1: 1317 |
| Kahramanmaraş Merkezli Yürütülen Çalışmalar Hakkında - 37 | Response\Number of staff | 1 | 0 | 0 | 1: 1353 | 1: 1375 |
| Kahramanmaraş Merkezli Yürütülen Çalışmalar Hakkında - 37 | Response\Search&Rescue   | 1 | 1 | 1 | 1: 1353 | 1: 1366 |
| Kahramanmaraş Merkezli Yürütülen Çalışmalar Hakkında - 37 | Response\Search&Rescue   | 1 | 1 | 1 | 1: 1353 | 1: 1366 |
| Kahramanmaraş Merkezli Yürütülen Çalışmalar Hakkında - 37 | Response\Number          | 0 | 1 | 0 | 1: 1353 | 1: 1375 |
| Kahramanmaraş Merkezli Yürütülen Çalışmalar Hakkında - 37 | Response\Number of staff | 1 | 0 | 0 | 1: 1422 | 1: 1444 |
| Kahramanmaraş Merkezli Yürütülen Çalışmalar Hakkında - 37 | Response\Search&Rescue   | 1 | 1 | 1 | 1: 1422 | 1: 1435 |
| Kahramanmaraş Merkezli Yürütülen Çalışmalar Hakkında - 37 | Response\Search&Rescue   | 1 | 1 | 1 | 1: 1422 | 1: 1435 |
| Kahramanmaraş Merkezli Yürütülen Çalışmalar Hakkında - 37 | Response\Number          | 0 | 1 | 0 | 1: 1422 | 1: 1444 |
| Kahramanmaraş Merkezli Yürütülen Çalışmalar Hakkında - 37 | Disaster                 | 1 | 1 | 1 | 1: 1463 | 1: 1466 |
| Kahramanmaraş Merkezli Yürütülen Çalışmalar Hakkında - 37 | Disaster                 | 1 | 1 | 1 | 1: 1463 | 1: 1466 |
| Kahramanmaraş Merkezli Yürütülen Çalışmalar Hakkında - 37 | Disaster                 | 1 | 1 | 1 | 1: 1771 | 1: 1774 |

|                                                                    |                               |   |   |   |         |         |
|--------------------------------------------------------------------|-------------------------------|---|---|---|---------|---------|
| Kahramanmaraş<br>Merkezli Yürütülen<br>Çalışmalar Hakkında -<br>37 | Disaster                      | 1 | 1 | 1 | 1: 1771 | 1: 1774 |
| Kahramanmaraş<br>Merkezli Yürütülen<br>Çalışmalar Hakkında -<br>37 | AFAD                          | 1 | 1 | 1 | 1: 1850 | 1: 1853 |
| Kahramanmaraş<br>Merkezli Yürütülen<br>Çalışmalar Hakkında -<br>37 | AFAD                          | 1 | 1 | 1 | 1: 1850 | 1: 1853 |
| Kahramanmaraş<br>Merkezli Yürütülen<br>Çalışmalar Hakkında -<br>37 | Response\Military             | 1 | 1 | 1 | 1: 1861 | 1: 1868 |
| Kahramanmaraş<br>Merkezli Yürütülen<br>Çalışmalar Hakkında -<br>37 | Response\Military             | 1 | 1 | 1 | 1: 1861 | 1: 1868 |
| Kahramanmaraş<br>Merkezli Yürütülen<br>Çalışmalar Hakkında -<br>37 | Shelter&meal\Hot meal         | 1 | 1 | 1 | 1: 1976 | 1: 1986 |
| Kahramanmaraş<br>Merkezli Yürütülen<br>Çalışmalar Hakkında -<br>37 | Shelter&meal\Hot meal         | 1 | 1 | 1 | 1: 1976 | 1: 1986 |
| Kahramanmaraş<br>Merkezli Yürütülen<br>Çalışmalar Hakkında -<br>37 | Earthquake                    | 1 | 1 | 1 | 1: 2078 | 1: 2083 |
| Kahramanmaraş<br>Merkezli Yürütülen<br>Çalışmalar Hakkında -<br>37 | Earthquake                    | 1 | 1 | 1 | 1: 2078 | 1: 2083 |
| Kahramanmaraş<br>Merkezli Yürütülen<br>Çalışmalar Hakkında -<br>37 | Earthquake                    | 1 | 1 | 1 | 1: 2212 | 1: 2217 |
| Kahramanmaraş<br>Merkezli Yürütülen<br>Çalışmalar Hakkında -<br>37 | Earthquake                    | 1 | 1 | 1 | 1: 2212 | 1: 2217 |
| Kahramanmaraş<br>Merkezli Yürütülen<br>Çalışmalar Hakkında -<br>37 | Earthquake                    | 1 | 1 | 1 | 1: 2315 | 1: 2320 |
| Kahramanmaraş<br>Merkezli Yürütülen<br>Çalışmalar Hakkında -<br>37 | Earthquake                    | 1 | 1 | 1 | 1: 2315 | 1: 2320 |
| Kahramanmaraş<br>Merkezli Yürütülen<br>Çalışmalar Hakkında -<br>37 | Disaster                      | 1 | 1 | 1 | 1: 2421 | 1: 2424 |
| Kahramanmaraş<br>Merkezli Yürütülen<br>Çalışmalar Hakkında -<br>37 | Disaster                      | 1 | 1 | 1 | 1: 2421 | 1: 2424 |
| Kahramanmaraş<br>Merkezli Yürütülen<br>Çalışmalar Hakkında -<br>37 | Coordination\Public relations | 1 | 1 | 1 | 1: 2470 | 1: 2475 |
| Kahramanmaraş<br>Merkezli Yürütülen<br>Çalışmalar Hakkında -<br>37 | Coordination\Public relations | 1 | 1 | 1 | 1: 2470 | 1: 2475 |
| Kahramanmaraş<br>Merkezli Yürütülen<br>Çalışmalar Hakkında -<br>37 | AFAD                          | 1 | 1 | 1 | 1: 2510 | 1: 2513 |
| Kahramanmaraş<br>Merkezli Yürütülen<br>Çalışmalar Hakkında -<br>37 | AFAD                          | 1 | 1 | 1 | 1: 2510 | 1: 2513 |
| Kahramanmaraş<br>Merkezli Yürütülen<br>Çalışmalar Hakkında -<br>37 | AFAD                          | 1 | 1 | 1 | 1: 2568 | 1: 2571 |

|                                                                    |                           |   |   |   |         |         |
|--------------------------------------------------------------------|---------------------------|---|---|---|---------|---------|
| Kahramanmaraş<br>Merkezli Yürütülen<br>Çalışmalar Hakkında -<br>37 | AFAD                      | 1 | 1 | 1 | 1: 2568 | 1: 2571 |
| Kahramanmaraş<br>Merkezli Yürütülen<br>Çalışmalar Hakkında -<br>37 | Response\Search&Rescue    | 1 | 1 | 1 | 1: 2703 | 1: 2716 |
| Kahramanmaraş<br>Merkezli Yürütülen<br>Çalışmalar Hakkında -<br>37 | Response\Search&Rescue    | 1 | 1 | 1 | 1: 2703 | 1: 2716 |
| Kahramanmaraş<br>Merkezli Yürütülen<br>Çalışmalar Hakkında -<br>37 | Disaster                  | 1 | 1 | 1 | 1: 2767 | 1: 2770 |
| Kahramanmaraş<br>Merkezli Yürütülen<br>Çalışmalar Hakkında -<br>37 | Disaster                  | 1 | 1 | 1 | 1: 2767 | 1: 2770 |
| Kahramanmaraş<br>Merkezli Yürütülen<br>Çalışmalar Hakkında -<br>37 | AFAD                      | 1 | 1 | 1 | 1: 2785 | 1: 2788 |
| Kahramanmaraş<br>Merkezli Yürütülen<br>Çalışmalar Hakkında -<br>37 | AFAD                      | 1 | 1 | 1 | 1: 2785 | 1: 2788 |
| Kahramanmaraş<br>Merkezli Yürütülen<br>Çalışmalar Hakkında -<br>37 | Recovery\Fund drive       | 1 | 1 | 1 | 1: 2924 | 1: 2942 |
| Kahramanmaraş<br>Merkezli Yürütülen<br>Çalışmalar Hakkında -<br>37 | Recovery\Fund drive       | 1 | 1 | 1 | 1: 2924 | 1: 2942 |
| Kahramanmaraş<br>Merkezli Yürütülen<br>Çalışmalar Hakkında -<br>37 | Kahramanmaraş             | 1 | 0 | 0 | 2: 17   | 2: 29   |
| Kahramanmaraş<br>Merkezli Yürütülen<br>Çalışmalar Hakkında -<br>37 | Pazarcık                  | 0 | 1 | 0 | 2: 17   | 2: 29   |
| Kahramanmaraş<br>Merkezli Yürütülen<br>Çalışmalar Hakkında -<br>37 | AFAD                      | 1 | 1 | 1 | 2: 102  | 2: 105  |
| Kahramanmaraş<br>Merkezli Yürütülen<br>Çalışmalar Hakkında -<br>37 | AFAD                      | 1 | 1 | 1 | 2: 102  | 2: 105  |
| Kahramanmaraş<br>Merkezli Yürütülen<br>Çalışmalar Hakkında -<br>37 | AFAD                      | 1 | 1 | 1 | 2: 257  | 2: 260  |
| Kahramanmaraş<br>Merkezli Yürütülen<br>Çalışmalar Hakkında -<br>37 | AFAD                      | 1 | 1 | 1 | 2: 257  | 2: 260  |
| Kahramanmaraş<br>Merkezli Yürütülen<br>Çalışmalar Hakkında -<br>37 | Preparedness\Preparedness | 1 | 1 | 1 | 2: 267  | 2: 277  |
| Kahramanmaraş<br>Merkezli Yürütülen<br>Çalışmalar Hakkında -<br>37 | Preparedness\Preparedness | 1 | 1 | 1 | 2: 267  | 2: 277  |
| Kahramanmaraş<br>Merkezli Yürütülen<br>Çalışmalar Hakkında -<br>37 | Disaster                  | 1 | 1 | 1 | 2: 267  | 2: 270  |
| Kahramanmaraş<br>Merkezli Yürütülen<br>Çalışmalar Hakkında -<br>37 | Disaster                  | 1 | 1 | 1 | 2: 267  | 2: 270  |
| Kahramanmaraş<br>Merkezli Yürütülen<br>Çalışmalar Hakkında -<br>37 | Disaster                  | 1 | 1 | 1 | 2: 315  | 2: 318  |

|                                                                       |                                 |   |   |   |        |        |
|-----------------------------------------------------------------------|---------------------------------|---|---|---|--------|--------|
| Kahramanmaraş<br>Merkezli Yürütülen<br>Çalışmalar Hakkında -<br>37    | Disaster                        | 1 | 1 | 1 | 2: 315 | 2: 318 |
| Kahramanmaraş<br>Merkezli Yürütülen<br>Çalışmalar Hakkında -<br>37    | Coordination\Social media       | 1 | 0 | 0 | 2: 396 | 2: 407 |
| Kahramanmaraş<br>Merkezli Yürütülen<br>Çalışmalar Hakkında -<br>37    | Coordination\Social media usage | 0 | 1 | 0 | 2: 396 | 2: 407 |
| Kahramanmaraş<br>Merkezli Yürütülen<br>Çalışmalar Hakkında -<br>37    | AFAD                            | 1 | 1 | 1 | 2: 452 | 2: 455 |
| Kahramanmaraş<br>Merkezli Yürütülen<br>Çalışmalar Hakkında -<br>37    | AFAD                            | 1 | 1 | 1 | 2: 452 | 2: 455 |
| Kahramanmaraş<br>Merkezli Yürütülen<br>Çalışmalar Hakkında -<br>37    | AFAD                            | 1 | 1 | 1 | 2: 474 | 2: 477 |
| Kahramanmaraş<br>Merkezli Yürütülen<br>Çalışmalar Hakkında -<br>37    | AFAD                            | 1 | 1 | 1 | 2: 474 | 2: 477 |
| Kahramanmaraş<br>Merkezli Yürütülen<br>Çalışmalar Hakkında -<br>37    | Coordination\Information        | 1 | 1 | 1 | 2: 519 | 2: 530 |
| Kahramanmaraş<br>Merkezli Yürütülen<br>Çalışmalar Hakkında -<br>37    | Coordination\Information        | 1 | 1 | 1 | 2: 519 | 2: 530 |
| Kahramanmaraş<br>Merkezli Yürütülen<br>Çalışmalar Hakkında -<br>37    | Recovery\Peacemaking            | 1 | 1 | 1 | 2: 535 | 2: 544 |
| Kahramanmaraş<br>Merkezli Yürütülen<br>Çalışmalar Hakkında -<br>37    | Recovery\Peacemaking            | 1 | 1 | 1 | 2: 535 | 2: 544 |
| Kahramanmaraş<br>Merkezli Yürütülen<br>Çalışmalar Hakkında -<br>37    | Coordination\Social media       | 1 | 0 | 0 | 2: 591 | 2: 602 |
| Kahramanmaraş<br>Merkezli Yürütülen<br>Çalışmalar Hakkında -<br>37    | Coordination\Social media usage | 0 | 1 | 0 | 2: 591 | 2: 602 |
| Kahramanmaraş<br>Merkezli Yürütülen<br>Çalışmalar Hakkında -<br>37    | Disaster                        | 1 | 1 | 1 | 2: 728 | 2: 731 |
| Kahramanmaraş<br>Merkezli Yürütülen<br>Çalışmalar Hakkında -<br>37    | Disaster                        | 1 | 1 | 1 | 2: 728 | 2: 731 |
| Kahramanmaraş<br>Merkezli Yürütülen<br>Çalışmalar Hakkında -<br>37    | Emergency                       | 1 | 1 | 1 | 2: 736 | 2: 745 |
| Kahramanmaraş<br>Merkezli Yürütülen<br>Çalışmalar Hakkında -<br>37    | Emergency                       | 1 | 1 | 1 | 2: 736 | 2: 745 |
| Kahramanmaraş'ta<br>Meydana Gelen<br>Depremier Hk Basın<br>Bülteni-35 | Kahramanmaraş                   | 1 | 0 | 0 | 1: 17  | 1: 29  |
| Kahramanmaraş'ta<br>Meydana Gelen<br>Depremier Hk Basın<br>Bülteni-35 | Pazarcık                        | 0 | 1 | 0 | 1: 17  | 1: 29  |
| Kahramanmaraş'ta<br>Meydana Gelen<br>Depremier Hk Basın<br>Bülteni-35 | Earthquake                      | 1 | 1 | 1 | 1: 48  | 1: 53  |

|                                                                    |               |   |   |   |        |        |
|--------------------------------------------------------------------|---------------|---|---|---|--------|--------|
| Kahramanmaraş'ta<br>Meydana Gelen<br>Deprem Hk Basın<br>Bülteni-35 | Earthquake    | 1 | 1 | 1 | 1: 48  | 1: 53  |
| Kahramanmaraş'ta<br>Meydana Gelen<br>Deprem Hk Basın<br>Bülteni-35 | AFAD          | 1 | 1 | 1 | 1: 91  | 1: 94  |
| Kahramanmaraş'ta<br>Meydana Gelen<br>Deprem Hk Basın<br>Bülteni-35 | AFAD          | 1 | 1 | 1 | 1: 91  | 1: 94  |
| Kahramanmaraş'ta<br>Meydana Gelen<br>Deprem Hk Basın<br>Bülteni-35 | Earthquake    | 1 | 1 | 1 | 1: 133 | 1: 138 |
| Kahramanmaraş'ta<br>Meydana Gelen<br>Deprem Hk Basın<br>Bülteni-35 | Earthquake    | 1 | 1 | 1 | 1: 133 | 1: 138 |
| Kahramanmaraş'ta<br>Meydana Gelen<br>Deprem Hk Basın<br>Bülteni-35 | Kahramanmaraş | 1 | 0 | 0 | 1: 168 | 1: 180 |
| Kahramanmaraş'ta<br>Meydana Gelen<br>Deprem Hk Basın<br>Bülteni-35 | Pazarcık      | 0 | 1 | 0 | 1: 168 | 1: 180 |
| Kahramanmaraş'ta<br>Meydana Gelen<br>Deprem Hk Basın<br>Bülteni-35 | Earthquake    | 1 | 1 | 1 | 1: 199 | 1: 204 |
| Kahramanmaraş'ta<br>Meydana Gelen<br>Deprem Hk Basın<br>Bülteni-35 | Earthquake    | 1 | 1 | 1 | 1: 199 | 1: 204 |
| Kahramanmaraş'ta<br>Meydana Gelen<br>Deprem Hk Basın<br>Bülteni-35 | Kahramanmaraş | 1 | 0 | 0 | 1: 280 | 1: 292 |
| Kahramanmaraş'ta<br>Meydana Gelen<br>Deprem Hk Basın<br>Bülteni-35 | Pazarcık      | 0 | 1 | 0 | 1: 280 | 1: 292 |
| Kahramanmaraş'ta<br>Meydana Gelen<br>Deprem Hk Basın<br>Bülteni-35 | Earthquake    | 1 | 1 | 1 | 1: 311 | 1: 316 |
| Kahramanmaraş'ta<br>Meydana Gelen<br>Deprem Hk Basın<br>Bülteni-35 | Earthquake    | 1 | 1 | 1 | 1: 311 | 1: 316 |
| Kahramanmaraş'ta<br>Meydana Gelen<br>Deprem Hk Basın<br>Bülteni-35 | Kahramanmaraş | 1 | 0 | 0 | 1: 352 | 1: 364 |
| Kahramanmaraş'ta<br>Meydana Gelen<br>Deprem Hk Basın<br>Bülteni-35 | Pazarcık      | 0 | 1 | 0 | 1: 352 | 1: 364 |
| Kahramanmaraş'ta<br>Meydana Gelen<br>Deprem Hk Basın<br>Bülteni-35 | Earthquake    | 1 | 1 | 1 | 1: 447 | 1: 452 |
| Kahramanmaraş'ta<br>Meydana Gelen<br>Deprem Hk Basın<br>Bülteni-35 | Earthquake    | 1 | 1 | 1 | 1: 447 | 1: 452 |
| Kahramanmaraş'ta<br>Meydana Gelen<br>Deprem Hk Basın<br>Bülteni-35 | Earthquake    | 1 | 1 | 1 | 1: 474 | 1: 479 |
| Kahramanmaraş'ta<br>Meydana Gelen<br>Deprem Hk Basın<br>Bülteni-35 | Earthquake    | 1 | 1 | 1 | 1: 474 | 1: 479 |
| Kahramanmaraş'ta<br>Meydana Gelen<br>Deprem Hk Basın<br>Bülteni-35 | Earthquake    | 1 | 1 | 1 | 1: 507 | 1: 512 |



|                                                                    |                           |   |   |   |         |         |
|--------------------------------------------------------------------|---------------------------|---|---|---|---------|---------|
| Kahramanmaraş'ta<br>Meydana Gelen<br>Deprem Hk Basın<br>Bülteni-35 | Earthquake                | 1 | 1 | 1 | 1: 507  | 1: 512  |
| Kahramanmaraş'ta<br>Meydana Gelen<br>Deprem Hk Basın<br>Bülteni-35 | Kahramanmaraş             | 1 | 0 | 0 | 1: 560  | 1: 572  |
| Kahramanmaraş'ta<br>Meydana Gelen<br>Deprem Hk Basın<br>Bülteni-35 | Pazarcık                  | 0 | 1 | 0 | 1: 560  | 1: 572  |
| Kahramanmaraş'ta<br>Meydana Gelen<br>Deprem Hk Basın<br>Bülteni-35 | Kahramanmaraş             | 1 | 0 | 0 | 1: 731  | 1: 743  |
| Kahramanmaraş'ta<br>Meydana Gelen<br>Deprem Hk Basın<br>Bülteni-35 | Pazarcık                  | 0 | 1 | 0 | 1: 731  | 1: 743  |
| Kahramanmaraş'ta<br>Meydana Gelen<br>Deprem Hk Basın<br>Bülteni-35 | Shelter&meal\Evacuation   | 1 | 1 | 1 | 1: 872  | 1: 878  |
| Kahramanmaraş'ta<br>Meydana Gelen<br>Deprem Hk Basın<br>Bülteni-35 | Shelter&meal\Evacuation   | 1 | 1 | 1 | 1: 872  | 1: 878  |
| Kahramanmaraş'ta<br>Meydana Gelen<br>Deprem Hk Basın<br>Bülteni-35 | AFAD                      | 1 | 1 | 1 | 1: 902  | 1: 905  |
| Kahramanmaraş'ta<br>Meydana Gelen<br>Deprem Hk Basın<br>Bülteni-35 | AFAD                      | 1 | 1 | 1 | 1: 902  | 1: 905  |
| Kahramanmaraş'ta<br>Meydana Gelen<br>Deprem Hk Basın<br>Bülteni-35 | Response\Coast guard&Navy | 1 | 1 | 1 | 1: 931  | 1: 944  |
| Kahramanmaraş'ta<br>Meydana Gelen<br>Deprem Hk Basın<br>Bülteni-35 | Response\Coast guard&Navy | 1 | 1 | 1 | 1: 931  | 1: 944  |
| Kahramanmaraş'ta<br>Meydana Gelen<br>Deprem Hk Basın<br>Bülteni-35 | Response\Number of staff  | 1 | 0 | 0 | 1: 1008 | 1: 1030 |
| Kahramanmaraş'ta<br>Meydana Gelen<br>Deprem Hk Basın<br>Bülteni-35 | Response\Search&Rescue    | 1 | 1 | 1 | 1: 1008 | 1: 1021 |
| Kahramanmaraş'ta<br>Meydana Gelen<br>Deprem Hk Basın<br>Bülteni-35 | Response\Search&Rescue    | 1 | 1 | 1 | 1: 1008 | 1: 1021 |
| Kahramanmaraş'ta<br>Meydana Gelen<br>Deprem Hk Basın<br>Bülteni-35 | Response\Number           | 0 | 1 | 0 | 1: 1008 | 1: 1030 |
| Kahramanmaraş'ta<br>Meydana Gelen<br>Deprem Hk Basın<br>Bülteni-35 | Response\Number of staff  | 1 | 0 | 0 | 1: 1059 | 1: 1081 |
| Kahramanmaraş'ta<br>Meydana Gelen<br>Deprem Hk Basın<br>Bülteni-35 | Response\Search&Rescue    | 1 | 1 | 1 | 1: 1059 | 1: 1072 |
| Kahramanmaraş'ta<br>Meydana Gelen<br>Deprem Hk Basın<br>Bülteni-35 | Response\Search&Rescue    | 1 | 1 | 1 | 1: 1059 | 1: 1072 |
| Kahramanmaraş'ta<br>Meydana Gelen<br>Deprem Hk Basın<br>Bülteni-35 | Response\Number           | 0 | 1 | 0 | 1: 1059 | 1: 1081 |
| Kahramanmaraş'ta<br>Meydana Gelen<br>Deprem Hk Basın<br>Bülteni-35 | AFAD                      | 1 | 1 | 1 | 1: 1111 | 1: 1114 |

|                                                                    |                           |   |   |   |         |         |
|--------------------------------------------------------------------|---------------------------|---|---|---|---------|---------|
| Kahramanmaraş'ta<br>Meydana Gelen<br>Deprem Hk Basın<br>Bülteni-35 | AFAD                      | 1 | 1 | 1 | 1: 1111 | 1: 1114 |
| Kahramanmaraş'ta<br>Meydana Gelen<br>Deprem Hk Basın<br>Bülteni-35 | Response\Military         | 1 | 1 | 1 | 1: 1126 | 1: 1133 |
| Kahramanmaraş'ta<br>Meydana Gelen<br>Deprem Hk Basın<br>Bülteni-35 | Response\Military         | 1 | 1 | 1 | 1: 1126 | 1: 1133 |
| Kahramanmaraş'ta<br>Meydana Gelen<br>Deprem Hk Basın<br>Bülteni-35 | Response\Number of staff  | 1 | 0 | 0 | 1: 1269 | 1: 1283 |
| Kahramanmaraş'ta<br>Meydana Gelen<br>Deprem Hk Basın<br>Bülteni-35 | Response\Number           | 0 | 1 | 0 | 1: 1269 | 1: 1283 |
| Kahramanmaraş'ta<br>Meydana Gelen<br>Deprem Hk Basın<br>Bülteni-35 | Response\Number of staff  | 1 | 0 | 0 | 1: 1325 | 1: 1339 |
| Kahramanmaraş'ta<br>Meydana Gelen<br>Deprem Hk Basın<br>Bülteni-35 | Response\Number           | 0 | 1 | 0 | 1: 1325 | 1: 1339 |
| Kahramanmaraş'ta<br>Meydana Gelen<br>Deprem Hk Basın<br>Bülteni-35 | Disaster                  | 1 | 1 | 1 | 1: 1357 | 1: 1360 |
| Kahramanmaraş'ta<br>Meydana Gelen<br>Deprem Hk Basın<br>Bülteni-35 | Disaster                  | 1 | 1 | 1 | 1: 1357 | 1: 1360 |
| Kahramanmaraş'ta<br>Meydana Gelen<br>Deprem Hk Basın<br>Bülteni-35 | Disaster                  | 1 | 1 | 1 | 1: 1533 | 1: 1536 |
| Kahramanmaraş'ta<br>Meydana Gelen<br>Deprem Hk Basın<br>Bülteni-35 | Disaster                  | 1 | 1 | 1 | 1: 1533 | 1: 1536 |
| Kahramanmaraş'ta<br>Meydana Gelen<br>Deprem Hk Basın<br>Bülteni-35 | AFAD                      | 1 | 1 | 1 | 1: 1585 | 1: 1588 |
| Kahramanmaraş'ta<br>Meydana Gelen<br>Deprem Hk Basın<br>Bülteni-35 | AFAD                      | 1 | 1 | 1 | 1: 1585 | 1: 1588 |
| Kahramanmaraş'ta<br>Meydana Gelen<br>Deprem Hk Basın<br>Bülteni-35 | Coordination\Coordination | 1 | 1 | 1 | 1: 1677 | 1: 1688 |
| Kahramanmaraş'ta<br>Meydana Gelen<br>Deprem Hk Basın<br>Bülteni-35 | Coordination\Coordination | 1 | 1 | 1 | 1: 1677 | 1: 1688 |
| Kahramanmaraş'ta<br>Meydana Gelen<br>Deprem Hk Basın<br>Bülteni-35 | Response\Coast guard&Navy | 1 | 1 | 1 | 1: 1864 | 1: 1879 |
| Kahramanmaraş'ta<br>Meydana Gelen<br>Deprem Hk Basın<br>Bülteni-35 | Response\Coast guard&Navy | 1 | 1 | 1 | 1: 1864 | 1: 1879 |
| Kahramanmaraş'ta<br>Meydana Gelen<br>Deprem Hk Basın<br>Bülteni-35 | Response\Coast guard&Navy | 1 | 1 | 1 | 1: 1882 | 1: 1895 |
| Kahramanmaraş'ta<br>Meydana Gelen<br>Deprem Hk Basın<br>Bülteni-35 | Response\Coast guard&Navy | 1 | 1 | 1 | 1: 1882 | 1: 1895 |
| Kahramanmaraş'ta<br>Meydana Gelen<br>Deprem Hk Basın<br>Bülteni-35 | Response\Military         | 1 | 1 | 1 | 1: 1911 | 1: 1918 |

|                                                                    |                           |   |   |   |         |         |
|--------------------------------------------------------------------|---------------------------|---|---|---|---------|---------|
| Kahramanmaraş'ta<br>Meydana Gelen<br>Deprem Hk Basın<br>Bülteni-35 | Response\Military         | 1 | 1 | 1 | 1: 1911 | 1: 1918 |
| Kahramanmaraş'ta<br>Meydana Gelen<br>Deprem Hk Basın<br>Bülteni-35 | Shelter&meal\Evacuation   | 1 | 1 | 1 | 1: 2139 | 1: 2145 |
| Kahramanmaraş'ta<br>Meydana Gelen<br>Deprem Hk Basın<br>Bülteni-35 | Shelter&meal\Evacuation   | 1 | 1 | 1 | 1: 2139 | 1: 2145 |
| Kahramanmaraş'ta<br>Meydana Gelen<br>Deprem Hk Basın<br>Bülteni-35 | Response\Coast guard&Navy | 1 | 1 | 1 | 1: 2183 | 1: 2196 |
| Kahramanmaraş'ta<br>Meydana Gelen<br>Deprem Hk Basın<br>Bülteni-35 | Response\Coast guard&Navy | 1 | 1 | 1 | 1: 2183 | 1: 2196 |
| Kahramanmaraş'ta<br>Meydana Gelen<br>Deprem Hk Basın<br>Bülteni-35 | Disaster                  | 1 | 1 | 1 | 1: 2258 | 1: 2261 |
| Kahramanmaraş'ta<br>Meydana Gelen<br>Deprem Hk Basın<br>Bülteni-35 | Disaster                  | 1 | 1 | 1 | 1: 2258 | 1: 2261 |
| Kahramanmaraş'ta<br>Meydana Gelen<br>Deprem Hk Basın<br>Bülteni-35 | Shelter&meal\Sheltering   | 1 | 1 | 1 | 1: 2263 | 1: 2269 |
| Kahramanmaraş'ta<br>Meydana Gelen<br>Deprem Hk Basın<br>Bülteni-35 | Shelter&meal\Sheltering   | 1 | 1 | 1 | 1: 2263 | 1: 2269 |
| Kahramanmaraş'ta<br>Meydana Gelen<br>Deprem Hk Basın<br>Bülteni-35 | Shelter&meal\Tent         | 1 | 1 | 1 | 1: 2384 | 1: 2388 |
| Kahramanmaraş'ta<br>Meydana Gelen<br>Deprem Hk Basın<br>Bülteni-35 | Shelter&meal\Tent         | 1 | 1 | 1 | 1: 2384 | 1: 2388 |
| Kahramanmaraş'ta<br>Meydana Gelen<br>Deprem Hk Basın<br>Bülteni-35 | Shelter&meal\Container    | 1 | 1 | 1 | 1: 2445 | 1: 2453 |
| Kahramanmaraş'ta<br>Meydana Gelen<br>Deprem Hk Basın<br>Bülteni-35 | Shelter&meal\Container    | 1 | 1 | 1 | 1: 2445 | 1: 2453 |
| Kahramanmaraş'ta<br>Meydana Gelen<br>Deprem Hk Basın<br>Bülteni-35 | Disaster                  | 1 | 1 | 1 | 1: 2492 | 1: 2495 |
| Kahramanmaraş'ta<br>Meydana Gelen<br>Deprem Hk Basın<br>Bülteni-35 | Disaster                  | 1 | 1 | 1 | 1: 2492 | 1: 2495 |
| Kahramanmaraş'ta<br>Meydana Gelen<br>Deprem Hk Basın<br>Bülteni-35 | Disaster                  | 1 | 1 | 1 | 1: 2511 | 1: 2514 |
| Kahramanmaraş'ta<br>Meydana Gelen<br>Deprem Hk Basın<br>Bülteni-35 | Disaster                  | 1 | 1 | 1 | 1: 2511 | 1: 2514 |
| Kahramanmaraş'ta<br>Meydana Gelen<br>Deprem Hk Basın<br>Bülteni-35 | Shelter&meal\Tent         | 1 | 1 | 1 | 1: 2533 | 1: 2537 |
| Kahramanmaraş'ta<br>Meydana Gelen<br>Deprem Hk Basın<br>Bülteni-35 | Shelter&meal\Tent         | 1 | 1 | 1 | 1: 2533 | 1: 2537 |
| Kahramanmaraş'ta<br>Meydana Gelen<br>Deprem Hk Basın<br>Bülteni-35 | Shelter&meal\Container    | 1 | 1 | 1 | 1: 2540 | 1: 2548 |

|                                                                       |                               |   |   |   |         |         |
|-----------------------------------------------------------------------|-------------------------------|---|---|---|---------|---------|
| Kahramanmaraş'ta<br>Meydana Gelen<br>Depremier Hk Basın<br>Bülteni-35 | Shelter&meal\Container        | 1 | 1 | 1 | 1: 2540 | 1: 2548 |
| Kahramanmaraş'ta<br>Meydana Gelen<br>Depremier Hk Basın<br>Bülteni-35 | Shelter&meal\Sheltering       | 1 | 1 | 1 | 1: 2630 | 1: 2636 |
| Kahramanmaraş'ta<br>Meydana Gelen<br>Depremier Hk Basın<br>Bülteni-35 | Shelter&meal\Sheltering       | 1 | 1 | 1 | 1: 2630 | 1: 2636 |
| Kahramanmaraş'ta<br>Meydana Gelen<br>Depremier Hk Basın<br>Bülteni-35 | Disaster                      | 1 | 1 | 1 | 1: 2682 | 1: 2685 |
| Kahramanmaraş'ta<br>Meydana Gelen<br>Depremier Hk Basın<br>Bülteni-35 | Disaster                      | 1 | 1 | 1 | 1: 2682 | 1: 2685 |
| Kahramanmaraş'ta<br>Meydana Gelen<br>Depremier Hk Basın<br>Bülteni-35 | AFAD                          | 1 | 1 | 1 | 1: 2717 | 1: 2720 |
| Kahramanmaraş'ta<br>Meydana Gelen<br>Depremier Hk Basın<br>Bülteni-35 | AFAD                          | 1 | 1 | 1 | 1: 2717 | 1: 2720 |
| Kahramanmaraş'ta<br>Meydana Gelen<br>Depremier Hk Basın<br>Bülteni-35 | Response\Military             | 1 | 1 | 1 | 1: 2728 | 1: 2735 |
| Kahramanmaraş'ta<br>Meydana Gelen<br>Depremier Hk Basın<br>Bülteni-35 | Response\Military             | 1 | 1 | 1 | 1: 2728 | 1: 2735 |
| Kahramanmaraş'ta<br>Meydana Gelen<br>Depremier Hk Basın<br>Bülteni-35 | Coordination\NGO              | 1 | 1 | 1 | 1: 2740 | 1: 2751 |
| Kahramanmaraş'ta<br>Meydana Gelen<br>Depremier Hk Basın<br>Bülteni-35 | Coordination\NGO              | 1 | 1 | 1 | 1: 2740 | 1: 2751 |
| Kahramanmaraş'ta<br>Meydana Gelen<br>Depremier Hk Basın<br>Bülteni-35 | Shelter&meal\Mobile kitchen   | 1 | 1 | 1 | 1: 2788 | 1: 2799 |
| Kahramanmaraş'ta<br>Meydana Gelen<br>Depremier Hk Basın<br>Bülteni-35 | Shelter&meal\Mobile kitchen   | 1 | 1 | 1 | 1: 2788 | 1: 2799 |
| Kahramanmaraş'ta<br>Meydana Gelen<br>Depremier Hk Basın<br>Bülteni-35 | Disaster                      | 1 | 1 | 1 | 1: 2828 | 1: 2831 |
| Kahramanmaraş'ta<br>Meydana Gelen<br>Depremier Hk Basın<br>Bülteni-35 | Disaster                      | 1 | 1 | 1 | 1: 2828 | 1: 2831 |
| Kahramanmaraş'ta<br>Meydana Gelen<br>Depremier Hk Basın<br>Bülteni-35 | Shelter&meal\Hot meal         | 1 | 1 | 1 | 1: 2855 | 1: 2865 |
| Kahramanmaraş'ta<br>Meydana Gelen<br>Depremier Hk Basın<br>Bülteni-35 | Shelter&meal\Hot meal         | 1 | 1 | 1 | 1: 2855 | 1: 2865 |
| Kahramanmaraş'ta<br>Meydana Gelen<br>Depremier Hk Basın<br>Bülteni-35 | Disaster                      | 1 | 1 | 1 | 1: 2995 | 1: 2998 |
| Kahramanmaraş'ta<br>Meydana Gelen<br>Depremier Hk Basın<br>Bülteni-35 | Disaster                      | 1 | 1 | 1 | 1: 2995 | 1: 2998 |
| Kahramanmaraş'ta<br>Meydana Gelen<br>Depremier Hk Basın<br>Bülteni-35 | Response\Psychosocial support | 1 | 1 | 1 | 1: 3000 | 1: 3010 |

|                                                                    |                               |   |   |   |         |         |
|--------------------------------------------------------------------|-------------------------------|---|---|---|---------|---------|
| Kahramanmaraş'ta<br>Meydana Gelen<br>Deprem Hk Basın<br>Bülteni-35 | Response\Psychosocial support | 1 | 1 | 1 | 1: 3000 | 1: 3010 |
| Kahramanmaraş'ta<br>Meydana Gelen<br>Deprem Hk Basın<br>Bülteni-35 | Kahramanmaraş                 | 1 | 0 | 0 | 2: 17   | 2: 29   |
| Kahramanmaraş'ta<br>Meydana Gelen<br>Deprem Hk Basın<br>Bülteni-35 | Pazarcık                      | 0 | 1 | 0 | 2: 17   | 2: 29   |
| Kahramanmaraş'ta<br>Meydana Gelen<br>Deprem Hk Basın<br>Bülteni-35 | Earthquake                    | 1 | 1 | 1 | 2: 48   | 2: 53   |
| Kahramanmaraş'ta<br>Meydana Gelen<br>Deprem Hk Basın<br>Bülteni-35 | Earthquake                    | 1 | 1 | 1 | 2: 48   | 2: 53   |
| Kahramanmaraş'ta<br>Meydana Gelen<br>Deprem Hk Basın<br>Bülteni-35 | AFAD                          | 1 | 1 | 1 | 2: 91   | 2: 94   |
| Kahramanmaraş'ta<br>Meydana Gelen<br>Deprem Hk Basın<br>Bülteni-35 | AFAD                          | 1 | 1 | 1 | 2: 91   | 2: 94   |
| Kahramanmaraş'ta<br>Meydana Gelen<br>Deprem Hk Basın<br>Bülteni-35 | Earthquake                    | 1 | 1 | 1 | 2: 133  | 2: 138  |
| Kahramanmaraş'ta<br>Meydana Gelen<br>Deprem Hk Basın<br>Bülteni-35 | Earthquake                    | 1 | 1 | 1 | 2: 133  | 2: 138  |
| Kahramanmaraş'ta<br>Meydana Gelen<br>Deprem Hk Basın<br>Bülteni-35 | Response\Welfare service      | 1 | 1 | 1 | 2: 176  | 2: 188  |
| Kahramanmaraş'ta<br>Meydana Gelen<br>Deprem Hk Basın<br>Bülteni-35 | Response\Welfare service      | 1 | 1 | 1 | 2: 176  | 2: 188  |
| Kahramanmaraş'ta<br>Meydana Gelen<br>Deprem Hk Basın<br>Bülteni-35 | Kahramanmaraş                 | 1 | 0 | 0 | 2: 199  | 2: 211  |
| Kahramanmaraş'ta<br>Meydana Gelen<br>Deprem Hk Basın<br>Bülteni-35 | Pazarcık                      | 0 | 1 | 0 | 2: 199  | 2: 211  |
| Kahramanmaraş'ta<br>Meydana Gelen<br>Deprem Hk Basın<br>Bülteni-35 | Earthquake                    | 1 | 1 | 1 | 2: 274  | 2: 279  |
| Kahramanmaraş'ta<br>Meydana Gelen<br>Deprem Hk Basın<br>Bülteni-35 | Earthquake                    | 1 | 1 | 1 | 2: 274  | 2: 279  |
| Kahramanmaraş'ta<br>Meydana Gelen<br>Deprem Hk Basın<br>Bülteni-35 | Response\Number of staff      | 1 | 0 | 0 | 2: 304  | 2: 318  |
| Kahramanmaraş'ta<br>Meydana Gelen<br>Deprem Hk Basın<br>Bülteni-35 | Response\Number               | 0 | 1 | 0 | 2: 304  | 2: 318  |
| Kahramanmaraş'ta<br>Meydana Gelen<br>Deprem Hk Basın<br>Bülteni-35 | Earthquake                    | 1 | 1 | 1 | 2: 327  | 2: 332  |
| Kahramanmaraş'ta<br>Meydana Gelen<br>Deprem Hk Basın<br>Bülteni-35 | Earthquake                    | 1 | 1 | 1 | 2: 327  | 2: 332  |
| Kahramanmaraş'ta<br>Meydana Gelen<br>Deprem Hk Basın<br>Bülteni-35 | Earthquake                    | 1 | 1 | 1 | 2: 396  | 2: 401  |

|                                                                    |                               |   |   |   |         |         |
|--------------------------------------------------------------------|-------------------------------|---|---|---|---------|---------|
| Kahramanmaraş'ta<br>Meydana Gelen<br>Deprem Hk Basın<br>Bülteni-35 | Earthquake                    | 1 | 1 | 1 | 2: 396  | 2: 401  |
| Kahramanmaraş'ta<br>Meydana Gelen<br>Deprem Hk Basın<br>Bülteni-35 | Earthquake                    | 1 | 1 | 1 | 2: 423  | 2: 428  |
| Kahramanmaraş'ta<br>Meydana Gelen<br>Deprem Hk Basın<br>Bülteni-35 | Earthquake                    | 1 | 1 | 1 | 2: 423  | 2: 428  |
| Kahramanmaraş'ta<br>Meydana Gelen<br>Deprem Hk Basın<br>Bülteni-35 | Response\Psychosocial support | 1 | 1 | 1 | 2: 489  | 2: 499  |
| Kahramanmaraş'ta<br>Meydana Gelen<br>Deprem Hk Basın<br>Bülteni-35 | Response\Psychosocial support | 1 | 1 | 1 | 2: 489  | 2: 499  |
| Kahramanmaraş'ta<br>Meydana Gelen<br>Deprem Hk Basın<br>Bülteni-35 | Disaster                      | 1 | 1 | 1 | 2: 607  | 2: 610  |
| Kahramanmaraş'ta<br>Meydana Gelen<br>Deprem Hk Basın<br>Bülteni-35 | Disaster                      | 1 | 1 | 1 | 2: 607  | 2: 610  |
| Kahramanmaraş'ta<br>Meydana Gelen<br>Deprem Hk Basın<br>Bülteni-35 | Coordination\Public relations | 1 | 1 | 1 | 2: 656  | 2: 661  |
| Kahramanmaraş'ta<br>Meydana Gelen<br>Deprem Hk Basın<br>Bülteni-35 | Coordination\Public relations | 1 | 1 | 1 | 2: 656  | 2: 661  |
| Kahramanmaraş'ta<br>Meydana Gelen<br>Deprem Hk Basın<br>Bülteni-35 | AFAD                          | 1 | 1 | 1 | 2: 696  | 2: 699  |
| Kahramanmaraş'ta<br>Meydana Gelen<br>Deprem Hk Basın<br>Bülteni-35 | AFAD                          | 1 | 1 | 1 | 2: 696  | 2: 699  |
| Kahramanmaraş'ta<br>Meydana Gelen<br>Deprem Hk Basın<br>Bülteni-35 | AFAD                          | 1 | 1 | 1 | 2: 754  | 2: 757  |
| Kahramanmaraş'ta<br>Meydana Gelen<br>Deprem Hk Basın<br>Bülteni-35 | AFAD                          | 1 | 1 | 1 | 2: 754  | 2: 757  |
| Kahramanmaraş'ta<br>Meydana Gelen<br>Deprem Hk Basın<br>Bülteni-35 | AFAD                          | 1 | 1 | 1 | 2: 871  | 2: 874  |
| Kahramanmaraş'ta<br>Meydana Gelen<br>Deprem Hk Basın<br>Bülteni-35 | AFAD                          | 1 | 1 | 1 | 2: 871  | 2: 874  |
| Kahramanmaraş'ta<br>Meydana Gelen<br>Deprem Hk Basın<br>Bülteni-35 | Response\Search&Rescue        | 1 | 1 | 1 | 2: 965  | 2: 978  |
| Kahramanmaraş'ta<br>Meydana Gelen<br>Deprem Hk Basın<br>Bülteni-35 | Response\Search&Rescue        | 1 | 1 | 1 | 2: 965  | 2: 978  |
| Kahramanmaraş'ta<br>Meydana Gelen<br>Deprem Hk Basın<br>Bülteni-35 | Disaster                      | 1 | 1 | 1 | 2: 1029 | 2: 1032 |
| Kahramanmaraş'ta<br>Meydana Gelen<br>Deprem Hk Basın<br>Bülteni-35 | Disaster                      | 1 | 1 | 1 | 2: 1029 | 2: 1032 |
| Kahramanmaraş'ta<br>Meydana Gelen<br>Deprem Hk Basın<br>Bülteni-35 | AFAD                          | 1 | 1 | 1 | 2: 1047 | 2: 1050 |

|                                                                    |                                 |   |   |   |         |         |
|--------------------------------------------------------------------|---------------------------------|---|---|---|---------|---------|
| Kahramanmaraş'ta<br>Meydana Gelen<br>Deprem Hk Basın<br>Bülteni-35 | AFAD                            | 1 | 1 | 1 | 2: 1047 | 2: 1050 |
| Kahramanmaraş'ta<br>Meydana Gelen<br>Deprem Hk Basın<br>Bülteni-35 | Preparedness\Preparedness       | 1 | 1 | 1 | 2: 1111 | 2: 1121 |
| Kahramanmaraş'ta<br>Meydana Gelen<br>Deprem Hk Basın<br>Bülteni-35 | Preparedness\Preparedness       | 1 | 1 | 1 | 2: 1111 | 2: 1121 |
| Kahramanmaraş'ta<br>Meydana Gelen<br>Deprem Hk Basın<br>Bülteni-35 | Disaster                        | 1 | 1 | 1 | 2: 1111 | 2: 1114 |
| Kahramanmaraş'ta<br>Meydana Gelen<br>Deprem Hk Basın<br>Bülteni-35 | Disaster                        | 1 | 1 | 1 | 2: 1111 | 2: 1114 |
| Kahramanmaraş'ta<br>Meydana Gelen<br>Deprem Hk Basın<br>Bülteni-35 | Disaster                        | 1 | 1 | 1 | 2: 1159 | 2: 1162 |
| Kahramanmaraş'ta<br>Meydana Gelen<br>Deprem Hk Basın<br>Bülteni-35 | Disaster                        | 1 | 1 | 1 | 2: 1159 | 2: 1162 |
| Kahramanmaraş'ta<br>Meydana Gelen<br>Deprem Hk Basın<br>Bülteni-35 | Recovery\Fund drive             | 1 | 1 | 1 | 2: 1220 | 2: 1238 |
| Kahramanmaraş'ta<br>Meydana Gelen<br>Deprem Hk Basın<br>Bülteni-35 | Recovery\Fund drive             | 1 | 1 | 1 | 2: 1220 | 2: 1238 |
| Kahramanmaraş'ta<br>Meydana Gelen<br>Deprem Hk Basın<br>Bülteni-35 | Coordination\Social media       | 1 | 0 | 0 | 2: 1336 | 2: 1347 |
| Kahramanmaraş'ta<br>Meydana Gelen<br>Deprem Hk Basın<br>Bülteni-35 | Coordination\Social media usage | 0 | 1 | 0 | 2: 1336 | 2: 1347 |
| Kahramanmaraş'ta<br>Meydana Gelen<br>Deprem Hk Basın<br>Bülteni-35 | AFAD                            | 1 | 1 | 1 | 2: 1392 | 2: 1395 |
| Kahramanmaraş'ta<br>Meydana Gelen<br>Deprem Hk Basın<br>Bülteni-35 | AFAD                            | 1 | 1 | 1 | 2: 1392 | 2: 1395 |
| Kahramanmaraş'ta<br>Meydana Gelen<br>Deprem Hk Basın<br>Bülteni-35 | AFAD                            | 1 | 1 | 1 | 2: 1414 | 2: 1417 |
| Kahramanmaraş'ta<br>Meydana Gelen<br>Deprem Hk Basın<br>Bülteni-35 | AFAD                            | 1 | 1 | 1 | 2: 1414 | 2: 1417 |
| Kahramanmaraş'ta<br>Meydana Gelen<br>Deprem Hk Basın<br>Bülteni-35 | Coordination\Information        | 1 | 1 | 1 | 2: 1459 | 2: 1470 |
| Kahramanmaraş'ta<br>Meydana Gelen<br>Deprem Hk Basın<br>Bülteni-35 | Coordination\Information        | 1 | 1 | 1 | 2: 1459 | 2: 1470 |
| Kahramanmaraş'ta<br>Meydana Gelen<br>Deprem Hk Basın<br>Bülteni-35 | Recovery\Peacemaking            | 1 | 1 | 1 | 2: 1475 | 2: 1484 |
| Kahramanmaraş'ta<br>Meydana Gelen<br>Deprem Hk Basın<br>Bülteni-35 | Recovery\Peacemaking            | 1 | 1 | 1 | 2: 1475 | 2: 1484 |
| Kahramanmaraş'ta<br>Meydana Gelen<br>Deprem Hk Basın<br>Bülteni-35 | Kahramanmaraş                   | 1 | 0 | 0 | 3: 17   | 3: 29   |

|                                                                    |                                 |   |   |   |        |        |
|--------------------------------------------------------------------|---------------------------------|---|---|---|--------|--------|
| Kahramanmaraş'ta<br>Meydana Gelen<br>Deprem Hk Basın<br>Bülteni-35 | Pazarcık                        | 0 | 1 | 0 | 3: 17  | 3: 29  |
| Kahramanmaraş'ta<br>Meydana Gelen<br>Deprem Hk Basın<br>Bülteni-35 | Earthquake                      | 1 | 1 | 1 | 3: 48  | 3: 53  |
| Kahramanmaraş'ta<br>Meydana Gelen<br>Deprem Hk Basın<br>Bülteni-35 | Earthquake                      | 1 | 1 | 1 | 3: 48  | 3: 53  |
| Kahramanmaraş'ta<br>Meydana Gelen<br>Deprem Hk Basın<br>Bülteni-35 | AFAD                            | 1 | 1 | 1 | 3: 91  | 3: 94  |
| Kahramanmaraş'ta<br>Meydana Gelen<br>Deprem Hk Basın<br>Bülteni-35 | AFAD                            | 1 | 1 | 1 | 3: 91  | 3: 94  |
| Kahramanmaraş'ta<br>Meydana Gelen<br>Deprem Hk Basın<br>Bülteni-35 | Earthquake                      | 1 | 1 | 1 | 3: 133 | 3: 138 |
| Kahramanmaraş'ta<br>Meydana Gelen<br>Deprem Hk Basın<br>Bülteni-35 | Earthquake                      | 1 | 1 | 1 | 3: 133 | 3: 138 |
| Kahramanmaraş'ta<br>Meydana Gelen<br>Deprem Hk Basın<br>Bülteni-35 | Coordination\Social media       | 1 | 0 | 0 | 3: 168 | 3: 179 |
| Kahramanmaraş'ta<br>Meydana Gelen<br>Deprem Hk Basın<br>Bülteni-35 | Coordination\Social media usage | 0 | 1 | 0 | 3: 168 | 3: 179 |
| Kahramanmaraş'ta<br>Meydana Gelen<br>Deprem Hk Basın<br>Bülteni-35 | Disaster                        | 1 | 1 | 1 | 3: 305 | 3: 308 |
| Kahramanmaraş'ta<br>Meydana Gelen<br>Deprem Hk Basın<br>Bülteni-35 | Disaster                        | 1 | 1 | 1 | 3: 305 | 3: 308 |
| Kahramanmaraş'ta<br>Meydana Gelen<br>Deprem Hk Basın<br>Bülteni-35 | Emergency                       | 1 | 1 | 1 | 3: 313 | 3: 322 |
| Kahramanmaraş'ta<br>Meydana Gelen<br>Deprem Hk Basın<br>Bülteni-35 | Emergency                       | 1 | 1 | 1 | 3: 313 | 3: 322 |
| Kahramanmaraş'ta<br>Meydana Gelen<br>Deprem Hk. – 34               | Kahramanmaraş                   | 1 | 0 | 0 | 1: 17  | 1: 29  |
| Kahramanmaraş'ta<br>Meydana Gelen<br>Deprem Hk. – 34               | Pazarcık                        | 0 | 1 | 0 | 1: 17  | 1: 29  |
| Kahramanmaraş'ta<br>Meydana Gelen<br>Deprem Hk. – 34               | Earthquake                      | 1 | 1 | 1 | 1: 48  | 1: 53  |
| Kahramanmaraş'ta<br>Meydana Gelen<br>Deprem Hk. – 34               | Earthquake                      | 1 | 1 | 1 | 1: 48  | 1: 53  |
| Kahramanmaraş'ta<br>Meydana Gelen<br>Deprem Hk. – 34               | AFAD                            | 1 | 1 | 1 | 1: 80  | 1: 83  |
| Kahramanmaraş'ta<br>Meydana Gelen<br>Deprem Hk. – 34               | AFAD                            | 1 | 1 | 1 | 1: 80  | 1: 83  |
| Kahramanmaraş'ta<br>Meydana Gelen<br>Deprem Hk. – 34               | Earthquake                      | 1 | 1 | 1 | 1: 122 | 1: 127 |
| Kahramanmaraş'ta<br>Meydana Gelen<br>Deprem Hk. – 34               | Earthquake                      | 1 | 1 | 1 | 1: 122 | 1: 127 |
| Kahramanmaraş'ta<br>Meydana Gelen<br>Deprem Hk. – 34               | Kahramanmaraş                   | 1 | 0 | 0 | 1: 143 | 1: 155 |



|                                                         |                           |   |   |   |        |        |
|---------------------------------------------------------|---------------------------|---|---|---|--------|--------|
| Kahramanmaraş'ta<br>Meydana Gelen<br>Depremler Hk. – 34 | Pazarcık                  | 0 | 1 | 0 | 1: 143 | 1: 155 |
| Kahramanmaraş'ta<br>Meydana Gelen<br>Depremler Hk. – 34 | Earthquake                | 1 | 1 | 1 | 1: 174 | 1: 179 |
| Kahramanmaraş'ta<br>Meydana Gelen<br>Depremler Hk. – 34 | Earthquake                | 1 | 1 | 1 | 1: 174 | 1: 179 |
| Kahramanmaraş'ta<br>Meydana Gelen<br>Depremler Hk. – 34 | Kahramanmaraş             | 1 | 0 | 0 | 1: 244 | 1: 256 |
| Kahramanmaraş'ta<br>Meydana Gelen<br>Depremler Hk. – 34 | Pazarcık                  | 0 | 1 | 0 | 1: 244 | 1: 256 |
| Kahramanmaraş'ta<br>Meydana Gelen<br>Depremler Hk. – 34 | Earthquake                | 1 | 1 | 1 | 1: 275 | 1: 280 |
| Kahramanmaraş'ta<br>Meydana Gelen<br>Depremler Hk. – 34 | Earthquake                | 1 | 1 | 1 | 1: 275 | 1: 280 |
| Kahramanmaraş'ta<br>Meydana Gelen<br>Depremler Hk. – 34 | Kahramanmaraş             | 1 | 0 | 0 | 1: 316 | 1: 328 |
| Kahramanmaraş'ta<br>Meydana Gelen<br>Depremler Hk. – 34 | Pazarcık                  | 0 | 1 | 0 | 1: 316 | 1: 328 |
| Kahramanmaraş'ta<br>Meydana Gelen<br>Depremler Hk. – 34 | Earthquake                | 1 | 1 | 1 | 1: 411 | 1: 416 |
| Kahramanmaraş'ta<br>Meydana Gelen<br>Depremler Hk. – 34 | Earthquake                | 1 | 1 | 1 | 1: 411 | 1: 416 |
| Kahramanmaraş'ta<br>Meydana Gelen<br>Depremler Hk. – 34 | Earthquake                | 1 | 1 | 1 | 1: 438 | 1: 443 |
| Kahramanmaraş'ta<br>Meydana Gelen<br>Depremler Hk. – 34 | Earthquake                | 1 | 1 | 1 | 1: 438 | 1: 443 |
| Kahramanmaraş'ta<br>Meydana Gelen<br>Depremler Hk. – 34 | Earthquake                | 1 | 1 | 1 | 1: 471 | 1: 476 |
| Kahramanmaraş'ta<br>Meydana Gelen<br>Depremler Hk. – 34 | Earthquake                | 1 | 1 | 1 | 1: 471 | 1: 476 |
| Kahramanmaraş'ta<br>Meydana Gelen<br>Depremler Hk. – 34 | Kahramanmaraş             | 1 | 0 | 0 | 1: 524 | 1: 536 |
| Kahramanmaraş'ta<br>Meydana Gelen<br>Depremler Hk. – 34 | Pazarcık                  | 0 | 1 | 0 | 1: 524 | 1: 536 |
| Kahramanmaraş'ta<br>Meydana Gelen<br>Depremler Hk. – 34 | Shelter&meal\Evacuation   | 1 | 1 | 1 | 1: 723 | 1: 729 |
| Kahramanmaraş'ta<br>Meydana Gelen<br>Depremler Hk. – 34 | Shelter&meal\Evacuation   | 1 | 1 | 1 | 1: 723 | 1: 729 |
| Kahramanmaraş'ta<br>Meydana Gelen<br>Depremler Hk. – 34 | AFAD                      | 1 | 1 | 1 | 1: 752 | 1: 755 |
| Kahramanmaraş'ta<br>Meydana Gelen<br>Depremler Hk. – 34 | AFAD                      | 1 | 1 | 1 | 1: 752 | 1: 755 |
| Kahramanmaraş'ta<br>Meydana Gelen<br>Depremler Hk. – 34 | Response\Coast guard&Navy | 1 | 1 | 1 | 1: 781 | 1: 794 |
| Kahramanmaraş'ta<br>Meydana Gelen<br>Depremler Hk. – 34 | Response\Coast guard&Navy | 1 | 1 | 1 | 1: 781 | 1: 794 |
| Kahramanmaraş'ta<br>Meydana Gelen<br>Depremler Hk. – 34 | Response\Number of staff  | 1 | 0 | 0 | 1: 858 | 1: 880 |
| Kahramanmaraş'ta<br>Meydana Gelen<br>Depremler Hk. – 34 | Response\Search&Rescue    | 1 | 1 | 1 | 1: 858 | 1: 871 |
| Kahramanmaraş'ta<br>Meydana Gelen<br>Depremler Hk. – 34 | Response\Search&Rescue    | 1 | 1 | 1 | 1: 858 | 1: 871 |
| Kahramanmaraş'ta<br>Meydana Gelen<br>Depremler Hk. – 34 | Response\Number           | 0 | 1 | 0 | 1: 858 | 1: 880 |

|                                                |                           |   |   |   |         |         |
|------------------------------------------------|---------------------------|---|---|---|---------|---------|
| Kahramanmaraş'ta Meydana Gelen Deprem Hk. – 34 | Response\Number of staff  | 1 | 0 | 0 | 1: 909  | 1: 931  |
| Kahramanmaraş'ta Meydana Gelen Deprem Hk. – 34 | Response\Search&Rescue    | 1 | 1 | 1 | 1: 909  | 1: 922  |
| Kahramanmaraş'ta Meydana Gelen Deprem Hk. – 34 | Response\Search&Rescue    | 1 | 1 | 1 | 1: 909  | 1: 922  |
| Kahramanmaraş'ta Meydana Gelen Deprem Hk. – 34 | Response\Number           | 0 | 1 | 0 | 1: 909  | 1: 931  |
| Kahramanmaraş'ta Meydana Gelen Deprem Hk. – 34 | AFAD                      | 1 | 1 | 1 | 1: 961  | 1: 964  |
| Kahramanmaraş'ta Meydana Gelen Deprem Hk. – 34 | AFAD                      | 1 | 1 | 1 | 1: 961  | 1: 964  |
| Kahramanmaraş'ta Meydana Gelen Deprem Hk. – 34 | Response\Military         | 1 | 1 | 1 | 1: 976  | 1: 983  |
| Kahramanmaraş'ta Meydana Gelen Deprem Hk. – 34 | Response\Military         | 1 | 1 | 1 | 1: 976  | 1: 983  |
| Kahramanmaraş'ta Meydana Gelen Deprem Hk. – 34 | Response\Number of staff  | 1 | 0 | 0 | 1: 1119 | 1: 1133 |
| Kahramanmaraş'ta Meydana Gelen Deprem Hk. – 34 | Response\Number           | 0 | 1 | 0 | 1: 1119 | 1: 1133 |
| Kahramanmaraş'ta Meydana Gelen Deprem Hk. – 34 | Response\Number of staff  | 1 | 0 | 0 | 1: 1175 | 1: 1189 |
| Kahramanmaraş'ta Meydana Gelen Deprem Hk. – 34 | Response\Number           | 0 | 1 | 0 | 1: 1175 | 1: 1189 |
| Kahramanmaraş'ta Meydana Gelen Deprem Hk. – 34 | Disaster                  | 1 | 1 | 1 | 1: 1207 | 1: 1210 |
| Kahramanmaraş'ta Meydana Gelen Deprem Hk. – 34 | Disaster                  | 1 | 1 | 1 | 1: 1207 | 1: 1210 |
| Kahramanmaraş'ta Meydana Gelen Deprem Hk. – 34 | Disaster                  | 1 | 1 | 1 | 1: 1382 | 1: 1385 |
| Kahramanmaraş'ta Meydana Gelen Deprem Hk. – 34 | Disaster                  | 1 | 1 | 1 | 1: 1382 | 1: 1385 |
| Kahramanmaraş'ta Meydana Gelen Deprem Hk. – 34 | AFAD                      | 1 | 1 | 1 | 1: 1434 | 1: 1437 |
| Kahramanmaraş'ta Meydana Gelen Deprem Hk. – 34 | AFAD                      | 1 | 1 | 1 | 1: 1434 | 1: 1437 |
| Kahramanmaraş'ta Meydana Gelen Deprem Hk. – 34 | Coordination\Coordination | 1 | 1 | 1 | 1: 1526 | 1: 1537 |
| Kahramanmaraş'ta Meydana Gelen Deprem Hk. – 34 | Coordination\Coordination | 1 | 1 | 1 | 1: 1526 | 1: 1537 |
| Kahramanmaraş'ta Meydana Gelen Deprem Hk. – 34 | Response\Coast guard&Navy | 1 | 1 | 1 | 1: 1728 | 1: 1743 |
| Kahramanmaraş'ta Meydana Gelen Deprem Hk. – 34 | Response\Coast guard&Navy | 1 | 1 | 1 | 1: 1728 | 1: 1743 |
| Kahramanmaraş'ta Meydana Gelen Deprem Hk. – 34 | Response\Coast guard&Navy | 1 | 1 | 1 | 1: 1746 | 1: 1759 |
| Kahramanmaraş'ta Meydana Gelen Deprem Hk. – 34 | Response\Coast guard&Navy | 1 | 1 | 1 | 1: 1746 | 1: 1759 |
| Kahramanmaraş'ta Meydana Gelen Deprem Hk. – 34 | Response\Military         | 1 | 1 | 1 | 1: 1775 | 1: 1782 |
| Kahramanmaraş'ta Meydana Gelen Deprem Hk. – 34 | Response\Military         | 1 | 1 | 1 | 1: 1775 | 1: 1782 |
| Kahramanmaraş'ta Meydana Gelen Deprem Hk. – 34 | Shelter&meal\Evacuation   | 1 | 1 | 1 | 1: 2006 | 1: 2012 |

|                                                |                             |   |   |   |         |         |
|------------------------------------------------|-----------------------------|---|---|---|---------|---------|
| Kahramanmaraş'ta Meydana Gelen Deprem Hk. – 34 | Shelter&meal\Evacuation     | 1 | 1 | 1 | 1: 2006 | 1: 2012 |
| Kahramanmaraş'ta Meydana Gelen Deprem Hk. – 34 | Response\Coast guard&Navy   | 1 | 1 | 1 | 1: 2050 | 1: 2063 |
| Kahramanmaraş'ta Meydana Gelen Deprem Hk. – 34 | Response\Coast guard&Navy   | 1 | 1 | 1 | 1: 2050 | 1: 2063 |
| Kahramanmaraş'ta Meydana Gelen Deprem Hk. – 34 | Disaster                    | 1 | 1 | 1 | 1: 2124 | 1: 2127 |
| Kahramanmaraş'ta Meydana Gelen Deprem Hk. – 34 | Disaster                    | 1 | 1 | 1 | 1: 2124 | 1: 2127 |
| Kahramanmaraş'ta Meydana Gelen Deprem Hk. – 34 | Shelter&meal\Sheltering     | 1 | 1 | 1 | 1: 2129 | 1: 2135 |
| Kahramanmaraş'ta Meydana Gelen Deprem Hk. – 34 | Shelter&meal\Sheltering     | 1 | 1 | 1 | 1: 2129 | 1: 2135 |
| Kahramanmaraş'ta Meydana Gelen Deprem Hk. – 34 | Shelter&meal\Tent           | 1 | 1 | 1 | 1: 2250 | 1: 2254 |
| Kahramanmaraş'ta Meydana Gelen Deprem Hk. – 34 | Shelter&meal\Tent           | 1 | 1 | 1 | 1: 2250 | 1: 2254 |
| Kahramanmaraş'ta Meydana Gelen Deprem Hk. – 34 | Shelter&meal\Container      | 1 | 1 | 1 | 1: 2306 | 1: 2314 |
| Kahramanmaraş'ta Meydana Gelen Deprem Hk. – 34 | Shelter&meal\Container      | 1 | 1 | 1 | 1: 2306 | 1: 2314 |
| Kahramanmaraş'ta Meydana Gelen Deprem Hk. – 34 | Shelter&meal\Sheltering     | 1 | 1 | 1 | 1: 2447 | 1: 2453 |
| Kahramanmaraş'ta Meydana Gelen Deprem Hk. – 34 | Shelter&meal\Sheltering     | 1 | 1 | 1 | 1: 2447 | 1: 2453 |
| Kahramanmaraş'ta Meydana Gelen Deprem Hk. – 34 | Shelter&meal\Sheltering     | 1 | 1 | 1 | 1: 2471 | 1: 2477 |
| Kahramanmaraş'ta Meydana Gelen Deprem Hk. – 34 | Shelter&meal\Sheltering     | 1 | 1 | 1 | 1: 2471 | 1: 2477 |
| Kahramanmaraş'ta Meydana Gelen Deprem Hk. – 34 | Disaster                    | 1 | 1 | 1 | 1: 2503 | 1: 2506 |
| Kahramanmaraş'ta Meydana Gelen Deprem Hk. – 34 | Disaster                    | 1 | 1 | 1 | 1: 2503 | 1: 2506 |
| Kahramanmaraş'ta Meydana Gelen Deprem Hk. – 34 | AFAD                        | 1 | 1 | 1 | 1: 2533 | 1: 2536 |
| Kahramanmaraş'ta Meydana Gelen Deprem Hk. – 34 | AFAD                        | 1 | 1 | 1 | 1: 2533 | 1: 2536 |
| Kahramanmaraş'ta Meydana Gelen Deprem Hk. – 34 | Response\Military           | 1 | 1 | 1 | 1: 2544 | 1: 2551 |
| Kahramanmaraş'ta Meydana Gelen Deprem Hk. – 34 | Response\Military           | 1 | 1 | 1 | 1: 2544 | 1: 2551 |
| Kahramanmaraş'ta Meydana Gelen Deprem Hk. – 34 | Coordination\NGO            | 1 | 1 | 1 | 1: 2556 | 1: 2567 |
| Kahramanmaraş'ta Meydana Gelen Deprem Hk. – 34 | Coordination\NGO            | 1 | 1 | 1 | 1: 2556 | 1: 2567 |
| Kahramanmaraş'ta Meydana Gelen Deprem Hk. – 34 | Shelter&meal\Mobile kitchen | 1 | 1 | 1 | 1: 2653 | 1: 2664 |
| Kahramanmaraş'ta Meydana Gelen Deprem Hk. – 34 | Shelter&meal\Mobile kitchen | 1 | 1 | 1 | 1: 2653 | 1: 2664 |
| Kahramanmaraş'ta Meydana Gelen Deprem Hk. – 34 | Shelter&meal\Mobile bakery  | 1 | 1 | 1 | 1: 2687 | 1: 2697 |
| Kahramanmaraş'ta Meydana Gelen Deprem Hk. – 34 | Shelter&meal\Mobile bakery  | 1 | 1 | 1 | 1: 2687 | 1: 2697 |

|                                                      |                               |   |   |   |         |         |
|------------------------------------------------------|-------------------------------|---|---|---|---------|---------|
| Kahramanmaraş'ta<br>Meydana Gelen<br>Deprem Hk. – 34 | Disaster                      | 1 | 1 | 1 | 1: 2823 | 1: 2826 |
| Kahramanmaraş'ta<br>Meydana Gelen<br>Deprem Hk. – 34 | Disaster                      | 1 | 1 | 1 | 1: 2823 | 1: 2826 |
| Kahramanmaraş'ta<br>Meydana Gelen<br>Deprem Hk. – 34 | Shelter&meal\Hot meal         | 1 | 1 | 1 | 1: 2850 | 1: 2860 |
| Kahramanmaraş'ta<br>Meydana Gelen<br>Deprem Hk. – 34 | Shelter&meal\Hot meal         | 1 | 1 | 1 | 1: 2850 | 1: 2860 |
| Kahramanmaraş'ta<br>Meydana Gelen<br>Deprem Hk. – 34 | Disaster                      | 1 | 1 | 1 | 1: 2990 | 1: 2993 |
| Kahramanmaraş'ta<br>Meydana Gelen<br>Deprem Hk. – 34 | Disaster                      | 1 | 1 | 1 | 1: 2990 | 1: 2993 |
| Kahramanmaraş'ta<br>Meydana Gelen<br>Deprem Hk. – 34 | Response\Psychosocial support | 1 | 1 | 1 | 1: 2995 | 1: 3005 |
| Kahramanmaraş'ta<br>Meydana Gelen<br>Deprem Hk. – 34 | Response\Psychosocial support | 1 | 1 | 1 | 1: 2995 | 1: 3005 |
| Kahramanmaraş'ta<br>Meydana Gelen<br>Deprem Hk. – 34 | Kahramanmaraş                 | 1 | 0 | 0 | 2: 17   | 2: 29   |
| Kahramanmaraş'ta<br>Meydana Gelen<br>Deprem Hk. – 34 | Pazarcık                      | 0 | 1 | 0 | 2: 17   | 2: 29   |
| Kahramanmaraş'ta<br>Meydana Gelen<br>Deprem Hk. – 34 | Earthquake                    | 1 | 1 | 1 | 2: 48   | 2: 53   |
| Kahramanmaraş'ta<br>Meydana Gelen<br>Deprem Hk. – 34 | Earthquake                    | 1 | 1 | 1 | 2: 48   | 2: 53   |
| Kahramanmaraş'ta<br>Meydana Gelen<br>Deprem Hk. – 34 | AFAD                          | 1 | 1 | 1 | 2: 80   | 2: 83   |
| Kahramanmaraş'ta<br>Meydana Gelen<br>Deprem Hk. – 34 | AFAD                          | 1 | 1 | 1 | 2: 80   | 2: 83   |
| Kahramanmaraş'ta<br>Meydana Gelen<br>Deprem Hk. – 34 | Earthquake                    | 1 | 1 | 1 | 2: 122  | 2: 127  |
| Kahramanmaraş'ta<br>Meydana Gelen<br>Deprem Hk. – 34 | Earthquake                    | 1 | 1 | 1 | 2: 122  | 2: 127  |
| Kahramanmaraş'ta<br>Meydana Gelen<br>Deprem Hk. – 34 | Response\Welfare service      | 1 | 1 | 1 | 2: 151  | 2: 163  |
| Kahramanmaraş'ta<br>Meydana Gelen<br>Deprem Hk. – 34 | Response\Welfare service      | 1 | 1 | 1 | 2: 151  | 2: 163  |
| Kahramanmaraş'ta<br>Meydana Gelen<br>Deprem Hk. – 34 | Kahramanmaraş                 | 1 | 0 | 0 | 2: 174  | 2: 186  |
| Kahramanmaraş'ta<br>Meydana Gelen<br>Deprem Hk. – 34 | Pazarcık                      | 0 | 1 | 0 | 2: 174  | 2: 186  |
| Kahramanmaraş'ta<br>Meydana Gelen<br>Deprem Hk. – 34 | Earthquake                    | 1 | 1 | 1 | 2: 249  | 2: 254  |
| Kahramanmaraş'ta<br>Meydana Gelen<br>Deprem Hk. – 34 | Earthquake                    | 1 | 1 | 1 | 2: 249  | 2: 254  |
| Kahramanmaraş'ta<br>Meydana Gelen<br>Deprem Hk. – 34 | Response\Number of staff      | 1 | 0 | 0 | 2: 279  | 2: 293  |
| Kahramanmaraş'ta<br>Meydana Gelen<br>Deprem Hk. – 34 | Response\Number               | 0 | 1 | 0 | 2: 279  | 2: 293  |
| Kahramanmaraş'ta<br>Meydana Gelen<br>Deprem Hk. – 34 | Earthquake                    | 1 | 1 | 1 | 2: 302  | 2: 307  |
| Kahramanmaraş'ta<br>Meydana Gelen<br>Deprem Hk. – 34 | Earthquake                    | 1 | 1 | 1 | 2: 302  | 2: 307  |
| Kahramanmaraş'ta<br>Meydana Gelen<br>Deprem Hk. – 34 | Earthquake                    | 1 | 1 | 1 | 2: 371  | 2: 376  |

|                                                      |                               |   |   |   |         |         |
|------------------------------------------------------|-------------------------------|---|---|---|---------|---------|
| Kahramanmaraş'ta<br>Meydana Gelen<br>Deprem Hk. – 34 | Earthquake                    | 1 | 1 | 1 | 2: 371  | 2: 376  |
| Kahramanmaraş'ta<br>Meydana Gelen<br>Deprem Hk. – 34 | Earthquake                    | 1 | 1 | 1 | 2: 398  | 2: 403  |
| Kahramanmaraş'ta<br>Meydana Gelen<br>Deprem Hk. – 34 | Earthquake                    | 1 | 1 | 1 | 2: 398  | 2: 403  |
| Kahramanmaraş'ta<br>Meydana Gelen<br>Deprem Hk. – 34 | Response\Psychosocial support | 1 | 1 | 1 | 2: 465  | 2: 475  |
| Kahramanmaraş'ta<br>Meydana Gelen<br>Deprem Hk. – 34 | Response\Psychosocial support | 1 | 1 | 1 | 2: 465  | 2: 475  |
| Kahramanmaraş'ta<br>Meydana Gelen<br>Deprem Hk. – 34 | Disaster                      | 1 | 1 | 1 | 2: 654  | 2: 657  |
| Kahramanmaraş'ta<br>Meydana Gelen<br>Deprem Hk. – 34 | Disaster                      | 1 | 1 | 1 | 2: 654  | 2: 657  |
| Kahramanmaraş'ta<br>Meydana Gelen<br>Deprem Hk. – 34 | Coordination\Public relations | 1 | 1 | 1 | 2: 783  | 2: 788  |
| Kahramanmaraş'ta<br>Meydana Gelen<br>Deprem Hk. – 34 | Coordination\Public relations | 1 | 1 | 1 | 2: 783  | 2: 788  |
| Kahramanmaraş'ta<br>Meydana Gelen<br>Deprem Hk. – 34 | AFAD                          | 1 | 1 | 1 | 2: 823  | 2: 826  |
| Kahramanmaraş'ta<br>Meydana Gelen<br>Deprem Hk. – 34 | AFAD                          | 1 | 1 | 1 | 2: 823  | 2: 826  |
| Kahramanmaraş'ta<br>Meydana Gelen<br>Deprem Hk. – 34 | AFAD                          | 1 | 1 | 1 | 2: 881  | 2: 884  |
| Kahramanmaraş'ta<br>Meydana Gelen<br>Deprem Hk. – 34 | AFAD                          | 1 | 1 | 1 | 2: 881  | 2: 884  |
| Kahramanmaraş'ta<br>Meydana Gelen<br>Deprem Hk. – 34 | AFAD                          | 1 | 1 | 1 | 2: 998  | 2: 1001 |
| Kahramanmaraş'ta<br>Meydana Gelen<br>Deprem Hk. – 34 | AFAD                          | 1 | 1 | 1 | 2: 998  | 2: 1001 |
| Kahramanmaraş'ta<br>Meydana Gelen<br>Deprem Hk. – 34 | Response\Search&Rescue        | 1 | 1 | 1 | 2: 1092 | 2: 1105 |
| Kahramanmaraş'ta<br>Meydana Gelen<br>Deprem Hk. – 34 | Response\Search&Rescue        | 1 | 1 | 1 | 2: 1092 | 2: 1105 |
| Kahramanmaraş'ta<br>Meydana Gelen<br>Deprem Hk. – 34 | Disaster                      | 1 | 1 | 1 | 2: 1156 | 2: 1159 |
| Kahramanmaraş'ta<br>Meydana Gelen<br>Deprem Hk. – 34 | Disaster                      | 1 | 1 | 1 | 2: 1156 | 2: 1159 |
| Kahramanmaraş'ta<br>Meydana Gelen<br>Deprem Hk. – 34 | AFAD                          | 1 | 1 | 1 | 2: 1174 | 2: 1177 |
| Kahramanmaraş'ta<br>Meydana Gelen<br>Deprem Hk. – 34 | AFAD                          | 1 | 1 | 1 | 2: 1174 | 2: 1177 |
| Kahramanmaraş'ta<br>Meydana Gelen<br>Deprem Hk. – 34 | Preparedness\Preparedness     | 1 | 1 | 1 | 2: 1238 | 2: 1248 |
| Kahramanmaraş'ta<br>Meydana Gelen<br>Deprem Hk. – 34 | Preparedness\Preparedness     | 1 | 1 | 1 | 2: 1238 | 2: 1248 |
| Kahramanmaraş'ta<br>Meydana Gelen<br>Deprem Hk. – 34 | Disaster                      | 1 | 1 | 1 | 2: 1238 | 2: 1241 |
| Kahramanmaraş'ta<br>Meydana Gelen<br>Deprem Hk. – 34 | Disaster                      | 1 | 1 | 1 | 2: 1238 | 2: 1241 |
| Kahramanmaraş'ta<br>Meydana Gelen<br>Deprem Hk. – 34 | Disaster                      | 1 | 1 | 1 | 2: 1286 | 2: 1289 |
| Kahramanmaraş'ta<br>Meydana Gelen<br>Deprem Hk. – 34 | Disaster                      | 1 | 1 | 1 | 2: 1286 | 2: 1289 |

|                                                      |                                 |   |   |   |         |         |
|------------------------------------------------------|---------------------------------|---|---|---|---------|---------|
| Kahramanmaraş'ta<br>Meydana Gelen<br>Deprem Hk. – 34 | Recovery\Fund drive             | 1 | 1 | 1 | 2: 1347 | 2: 1365 |
| Kahramanmaraş'ta<br>Meydana Gelen<br>Deprem Hk. – 34 | Recovery\Fund drive             | 1 | 1 | 1 | 2: 1347 | 2: 1365 |
| Kahramanmaraş'ta<br>Meydana Gelen<br>Deprem Hk. – 34 | Coordination\Social media       | 1 | 0 | 0 | 2: 1463 | 2: 1474 |
| Kahramanmaraş'ta<br>Meydana Gelen<br>Deprem Hk. – 34 | Coordination\Social media usage | 0 | 1 | 0 | 2: 1463 | 2: 1474 |
| Kahramanmaraş'ta<br>Meydana Gelen<br>Deprem Hk. – 34 | AFAD                            | 1 | 1 | 1 | 2: 1519 | 2: 1522 |
| Kahramanmaraş'ta<br>Meydana Gelen<br>Deprem Hk. – 34 | AFAD                            | 1 | 1 | 1 | 2: 1519 | 2: 1522 |
| Kahramanmaraş'ta<br>Meydana Gelen<br>Deprem Hk. – 34 | AFAD                            | 1 | 1 | 1 | 2: 1541 | 2: 1544 |
| Kahramanmaraş'ta<br>Meydana Gelen<br>Deprem Hk. – 34 | AFAD                            | 1 | 1 | 1 | 2: 1541 | 2: 1544 |
| Kahramanmaraş'ta<br>Meydana Gelen<br>Deprem Hk. – 34 | Coordination\Information        | 1 | 1 | 1 | 2: 1586 | 2: 1597 |
| Kahramanmaraş'ta<br>Meydana Gelen<br>Deprem Hk. – 34 | Coordination\Information        | 1 | 1 | 1 | 2: 1586 | 2: 1597 |
| Kahramanmaraş'ta<br>Meydana Gelen<br>Deprem Hk. – 34 | Recovery\Peacemaking            | 1 | 1 | 1 | 2: 1602 | 2: 1611 |
| Kahramanmaraş'ta<br>Meydana Gelen<br>Deprem Hk. – 34 | Recovery\Peacemaking            | 1 | 1 | 1 | 2: 1602 | 2: 1611 |
| Kahramanmaraş'ta<br>Meydana Gelen<br>Deprem Hk. – 34 | Kahramanmaraş                   | 1 | 0 | 0 | 3: 17   | 3: 29   |
| Kahramanmaraş'ta<br>Meydana Gelen<br>Deprem Hk. – 34 | Pazarcık                        | 0 | 1 | 0 | 3: 17   | 3: 29   |
| Kahramanmaraş'ta<br>Meydana Gelen<br>Deprem Hk. – 34 | Earthquake                      | 1 | 1 | 1 | 3: 48   | 3: 53   |
| Kahramanmaraş'ta<br>Meydana Gelen<br>Deprem Hk. – 34 | Earthquake                      | 1 | 1 | 1 | 3: 48   | 3: 53   |
| Kahramanmaraş'ta<br>Meydana Gelen<br>Deprem Hk. – 34 | AFAD                            | 1 | 1 | 1 | 3: 80   | 3: 83   |
| Kahramanmaraş'ta<br>Meydana Gelen<br>Deprem Hk. – 34 | AFAD                            | 1 | 1 | 1 | 3: 80   | 3: 83   |
| Kahramanmaraş'ta<br>Meydana Gelen<br>Deprem Hk. – 34 | Earthquake                      | 1 | 1 | 1 | 3: 122  | 3: 127  |
| Kahramanmaraş'ta<br>Meydana Gelen<br>Deprem Hk. – 34 | Earthquake                      | 1 | 1 | 1 | 3: 122  | 3: 127  |
| Kahramanmaraş'ta<br>Meydana Gelen<br>Deprem Hk. – 34 | Coordination\Social media       | 1 | 0 | 0 | 3: 143  | 3: 154  |
| Kahramanmaraş'ta<br>Meydana Gelen<br>Deprem Hk. – 34 | Coordination\Social media usage | 0 | 1 | 0 | 3: 143  | 3: 154  |
| Kahramanmaraş'ta<br>Meydana Gelen<br>Deprem Hk. – 34 | Disaster                        | 1 | 1 | 1 | 3: 280  | 3: 283  |
| Kahramanmaraş'ta<br>Meydana Gelen<br>Deprem Hk. – 34 | Disaster                        | 1 | 1 | 1 | 3: 280  | 3: 283  |
| Kahramanmaraş'ta<br>Meydana Gelen<br>Deprem Hk. – 34 | Emergency                       | 1 | 1 | 1 | 3: 288  | 3: 297  |
| Kahramanmaraş'ta<br>Meydana Gelen<br>Deprem Hk. – 34 | Emergency                       | 1 | 1 | 1 | 3: 288  | 3: 297  |

|                                                                       |               |   |   |   |        |        |
|-----------------------------------------------------------------------|---------------|---|---|---|--------|--------|
| Kahramanmaraş'ta<br>Meydana Gelen<br>Deprem Hk. Basın<br>Bülteni – 30 | Kahramanmaraş | 1 | 0 | 0 | 1: 17  | 1: 29  |
| Kahramanmaraş'ta<br>Meydana Gelen<br>Deprem Hk. Basın<br>Bülteni – 30 | Pazarcık      | 0 | 1 | 0 | 1: 17  | 1: 29  |
| Kahramanmaraş'ta<br>Meydana Gelen<br>Deprem Hk. Basın<br>Bülteni – 30 | Earthquake    | 1 | 1 | 1 | 1: 48  | 1: 53  |
| Kahramanmaraş'ta<br>Meydana Gelen<br>Deprem Hk. Basın<br>Bülteni – 30 | Earthquake    | 1 | 1 | 1 | 1: 48  | 1: 53  |
| Kahramanmaraş'ta<br>Meydana Gelen<br>Deprem Hk. Basın<br>Bülteni – 30 | AFAD          | 1 | 1 | 1 | 1: 94  | 1: 97  |
| Kahramanmaraş'ta<br>Meydana Gelen<br>Deprem Hk. Basın<br>Bülteni – 30 | AFAD          | 1 | 1 | 1 | 1: 94  | 1: 97  |
| Kahramanmaraş'ta<br>Meydana Gelen<br>Deprem Hk. Basın<br>Bülteni – 30 | Earthquake    | 1 | 1 | 1 | 1: 136 | 1: 141 |
| Kahramanmaraş'ta<br>Meydana Gelen<br>Deprem Hk. Basın<br>Bülteni – 30 | Earthquake    | 1 | 1 | 1 | 1: 136 | 1: 141 |
| Kahramanmaraş'ta<br>Meydana Gelen<br>Deprem Hk. Basın<br>Bülteni – 30 | Kahramanmaraş | 1 | 0 | 0 | 1: 171 | 1: 183 |
| Kahramanmaraş'ta<br>Meydana Gelen<br>Deprem Hk. Basın<br>Bülteni – 30 | Pazarcık      | 0 | 1 | 0 | 1: 171 | 1: 183 |
| Kahramanmaraş'ta<br>Meydana Gelen<br>Deprem Hk. Basın<br>Bülteni – 30 | Earthquake    | 1 | 1 | 1 | 1: 202 | 1: 207 |
| Kahramanmaraş'ta<br>Meydana Gelen<br>Deprem Hk. Basın<br>Bülteni – 30 | Earthquake    | 1 | 1 | 1 | 1: 202 | 1: 207 |
| Kahramanmaraş'ta<br>Meydana Gelen<br>Deprem Hk. Basın<br>Bülteni – 30 | Kahramanmaraş | 1 | 0 | 0 | 1: 286 | 1: 298 |
| Kahramanmaraş'ta<br>Meydana Gelen<br>Deprem Hk. Basın<br>Bülteni – 30 | Pazarcık      | 0 | 1 | 0 | 1: 286 | 1: 298 |
| Kahramanmaraş'ta<br>Meydana Gelen<br>Deprem Hk. Basın<br>Bülteni – 30 | Earthquake    | 1 | 1 | 1 | 1: 317 | 1: 322 |
| Kahramanmaraş'ta<br>Meydana Gelen<br>Deprem Hk. Basın<br>Bülteni – 30 | Earthquake    | 1 | 1 | 1 | 1: 317 | 1: 322 |
| Kahramanmaraş'ta<br>Meydana Gelen<br>Deprem Hk. Basın<br>Bülteni – 30 | Kahramanmaraş | 1 | 0 | 0 | 1: 383 | 1: 395 |
| Kahramanmaraş'ta<br>Meydana Gelen<br>Deprem Hk. Basın<br>Bülteni – 30 | Pazarcık      | 0 | 1 | 0 | 1: 383 | 1: 395 |
| Kahramanmaraş'ta<br>Meydana Gelen<br>Deprem Hk. Basın<br>Bülteni – 30 | Earthquake    | 1 | 1 | 1 | 1: 478 | 1: 483 |
| Kahramanmaraş'ta<br>Meydana Gelen<br>Deprem Hk. Basın<br>Bülteni – 30 | Earthquake    | 1 | 1 | 1 | 1: 478 | 1: 483 |

|                                                                       |                           |   |   |   |        |         |
|-----------------------------------------------------------------------|---------------------------|---|---|---|--------|---------|
| Kahramanmaraş'ta<br>Meydana Gelen<br>Deprem Hk. Basın<br>Bülteni – 30 | Earthquake                | 1 | 1 | 1 | 1: 505 | 1: 510  |
| Kahramanmaraş'ta<br>Meydana Gelen<br>Deprem Hk. Basın<br>Bülteni – 30 | Earthquake                | 1 | 1 | 1 | 1: 505 | 1: 510  |
| Kahramanmaraş'ta<br>Meydana Gelen<br>Deprem Hk. Basın<br>Bülteni – 30 | Earthquake                | 1 | 1 | 1 | 1: 538 | 1: 543  |
| Kahramanmaraş'ta<br>Meydana Gelen<br>Deprem Hk. Basın<br>Bülteni – 30 | Earthquake                | 1 | 1 | 1 | 1: 538 | 1: 543  |
| Kahramanmaraş'ta<br>Meydana Gelen<br>Deprem Hk. Basın<br>Bülteni – 30 | Kahramanmaraş             | 1 | 0 | 0 | 1: 591 | 1: 603  |
| Kahramanmaraş'ta<br>Meydana Gelen<br>Deprem Hk. Basın<br>Bülteni – 30 | Pazarcık                  | 0 | 1 | 0 | 1: 591 | 1: 603  |
| Kahramanmaraş'ta<br>Meydana Gelen<br>Deprem Hk. Basın<br>Bülteni – 30 | Disaster                  | 1 | 1 | 1 | 1: 768 | 1: 771  |
| Kahramanmaraş'ta<br>Meydana Gelen<br>Deprem Hk. Basın<br>Bülteni – 30 | Disaster                  | 1 | 1 | 1 | 1: 768 | 1: 771  |
| Kahramanmaraş'ta<br>Meydana Gelen<br>Deprem Hk. Basın<br>Bülteni – 30 | Shelter&meal\Evacuation   | 1 | 1 | 1 | 1: 800 | 1: 806  |
| Kahramanmaraş'ta<br>Meydana Gelen<br>Deprem Hk. Basın<br>Bülteni – 30 | Shelter&meal\Evacuation   | 1 | 1 | 1 | 1: 800 | 1: 806  |
| Kahramanmaraş'ta<br>Meydana Gelen<br>Deprem Hk. Basın<br>Bülteni – 30 | AFAD                      | 1 | 1 | 1 | 1: 829 | 1: 832  |
| Kahramanmaraş'ta<br>Meydana Gelen<br>Deprem Hk. Basın<br>Bülteni – 30 | AFAD                      | 1 | 1 | 1 | 1: 829 | 1: 832  |
| Kahramanmaraş'ta<br>Meydana Gelen<br>Deprem Hk. Basın<br>Bülteni – 30 | Response\Coast guard&Navy | 1 | 1 | 1 | 1: 858 | 1: 871  |
| Kahramanmaraş'ta<br>Meydana Gelen<br>Deprem Hk. Basın<br>Bülteni – 30 | Response\Coast guard&Navy | 1 | 1 | 1 | 1: 858 | 1: 871  |
| Kahramanmaraş'ta<br>Meydana Gelen<br>Deprem Hk. Basın<br>Bülteni – 30 | Response\Number of staff  | 1 | 0 | 0 | 1: 935 | 1: 957  |
| Kahramanmaraş'ta<br>Meydana Gelen<br>Deprem Hk. Basın<br>Bülteni – 30 | Response\Search&Rescue    | 1 | 1 | 1 | 1: 935 | 1: 948  |
| Kahramanmaraş'ta<br>Meydana Gelen<br>Deprem Hk. Basın<br>Bülteni – 30 | Response\Search&Rescue    | 1 | 1 | 1 | 1: 935 | 1: 948  |
| Kahramanmaraş'ta<br>Meydana Gelen<br>Deprem Hk. Basın<br>Bülteni – 30 | Response\Number           | 0 | 1 | 0 | 1: 935 | 1: 957  |
| Kahramanmaraş'ta<br>Meydana Gelen<br>Deprem Hk. Basın<br>Bülteni – 30 | Response\Number of staff  | 1 | 0 | 0 | 1: 986 | 1: 1008 |
| Kahramanmaraş'ta<br>Meydana Gelen<br>Deprem Hk. Basın<br>Bülteni – 30 | Response\Search&Rescue    | 1 | 1 | 1 | 1: 986 | 1: 999  |



|                                                                       |                          |   |   |   |         |         |
|-----------------------------------------------------------------------|--------------------------|---|---|---|---------|---------|
| Kahramanmaraş'ta<br>Meydana Gelen<br>Deprem Hk. Basın<br>Bülteni – 30 | Response\Search&Rescue   | 1 | 1 | 1 | 1: 986  | 1: 999  |
| Kahramanmaraş'ta<br>Meydana Gelen<br>Deprem Hk. Basın<br>Bülteni – 30 | Response\Number          | 0 | 1 | 0 | 1: 986  | 1: 1008 |
| Kahramanmaraş'ta<br>Meydana Gelen<br>Deprem Hk. Basın<br>Bülteni – 30 | Response\Number of staff | 1 | 0 | 0 | 1: 1109 | 1: 1131 |
| Kahramanmaraş'ta<br>Meydana Gelen<br>Deprem Hk. Basın<br>Bülteni – 30 | Response\Search&Rescue   | 1 | 1 | 1 | 1: 1109 | 1: 1122 |
| Kahramanmaraş'ta<br>Meydana Gelen<br>Deprem Hk. Basın<br>Bülteni – 30 | Response\Search&Rescue   | 1 | 1 | 1 | 1: 1109 | 1: 1122 |
| Kahramanmaraş'ta<br>Meydana Gelen<br>Deprem Hk. Basın<br>Bülteni – 30 | Response\Number          | 0 | 1 | 0 | 1: 1109 | 1: 1131 |
| Kahramanmaraş'ta<br>Meydana Gelen<br>Deprem Hk. Basın<br>Bülteni – 30 | AFAD                     | 1 | 1 | 1 | 1: 1160 | 1: 1163 |
| Kahramanmaraş'ta<br>Meydana Gelen<br>Deprem Hk. Basın<br>Bülteni – 30 | AFAD                     | 1 | 1 | 1 | 1: 1160 | 1: 1163 |
| Kahramanmaraş'ta<br>Meydana Gelen<br>Deprem Hk. Basın<br>Bülteni – 30 | Response\Military        | 1 | 1 | 1 | 1: 1175 | 1: 1182 |
| Kahramanmaraş'ta<br>Meydana Gelen<br>Deprem Hk. Basın<br>Bülteni – 30 | Response\Military        | 1 | 1 | 1 | 1: 1175 | 1: 1182 |
| Kahramanmaraş'ta<br>Meydana Gelen<br>Deprem Hk. Basın<br>Bülteni – 30 | Response\Number of staff | 1 | 0 | 0 | 1: 1294 | 1: 1308 |
| Kahramanmaraş'ta<br>Meydana Gelen<br>Deprem Hk. Basın<br>Bülteni – 30 | Response\Number          | 0 | 1 | 0 | 1: 1294 | 1: 1308 |
| Kahramanmaraş'ta<br>Meydana Gelen<br>Deprem Hk. Basın<br>Bülteni – 30 | Response\Number of staff | 1 | 0 | 0 | 1: 1350 | 1: 1364 |
| Kahramanmaraş'ta<br>Meydana Gelen<br>Deprem Hk. Basın<br>Bülteni – 30 | Response\Number          | 0 | 1 | 0 | 1: 1350 | 1: 1364 |
| Kahramanmaraş'ta<br>Meydana Gelen<br>Deprem Hk. Basın<br>Bülteni – 30 | Disaster                 | 1 | 1 | 1 | 1: 1380 | 1: 1383 |
| Kahramanmaraş'ta<br>Meydana Gelen<br>Deprem Hk. Basın<br>Bülteni – 30 | Disaster                 | 1 | 1 | 1 | 1: 1380 | 1: 1383 |
| Kahramanmaraş'ta<br>Meydana Gelen<br>Deprem Hk. Basın<br>Bülteni – 30 | Disaster                 | 1 | 1 | 1 | 1: 1545 | 1: 1548 |
| Kahramanmaraş'ta<br>Meydana Gelen<br>Deprem Hk. Basın<br>Bülteni – 30 | Disaster                 | 1 | 1 | 1 | 1: 1545 | 1: 1548 |
| Kahramanmaraş'ta<br>Meydana Gelen<br>Deprem Hk. Basın<br>Bülteni – 30 | AFAD                     | 1 | 1 | 1 | 1: 1609 | 1: 1612 |
| Kahramanmaraş'ta<br>Meydana Gelen<br>Deprem Hk. Basın<br>Bülteni – 30 | AFAD                     | 1 | 1 | 1 | 1: 1609 | 1: 1612 |

|                                                                       |                           |   |   |   |         |         |
|-----------------------------------------------------------------------|---------------------------|---|---|---|---------|---------|
| Kahramanmaraş'ta<br>Meydana Gelen<br>Deprem Hk. Basın<br>Bülteni – 30 | Coordination\Coordination | 1 | 1 | 1 | 1: 1701 | 1: 1712 |
| Kahramanmaraş'ta<br>Meydana Gelen<br>Deprem Hk. Basın<br>Bülteni – 30 | Coordination\Coordination | 1 | 1 | 1 | 1: 1701 | 1: 1712 |
| Kahramanmaraş'ta<br>Meydana Gelen<br>Deprem Hk. Basın<br>Bülteni – 30 | Response\Coast guard&Navy | 1 | 1 | 1 | 1: 1905 | 1: 1920 |
| Kahramanmaraş'ta<br>Meydana Gelen<br>Deprem Hk. Basın<br>Bülteni – 30 | Response\Coast guard&Navy | 1 | 1 | 1 | 1: 1905 | 1: 1920 |
| Kahramanmaraş'ta<br>Meydana Gelen<br>Deprem Hk. Basın<br>Bülteni – 30 | Response\Coast guard&Navy | 1 | 1 | 1 | 1: 1923 | 1: 1936 |
| Kahramanmaraş'ta<br>Meydana Gelen<br>Deprem Hk. Basın<br>Bülteni – 30 | Response\Coast guard&Navy | 1 | 1 | 1 | 1: 1923 | 1: 1936 |
| Kahramanmaraş'ta<br>Meydana Gelen<br>Deprem Hk. Basın<br>Bülteni – 30 | Response\Military         | 1 | 1 | 1 | 1: 1952 | 1: 1959 |
| Kahramanmaraş'ta<br>Meydana Gelen<br>Deprem Hk. Basın<br>Bülteni – 30 | Response\Military         | 1 | 1 | 1 | 1: 1952 | 1: 1959 |
| Kahramanmaraş'ta<br>Meydana Gelen<br>Deprem Hk. Basın<br>Bülteni – 30 | Shelter&meal\Evacuation   | 1 | 1 | 1 | 1: 2164 | 1: 2170 |
| Kahramanmaraş'ta<br>Meydana Gelen<br>Deprem Hk. Basın<br>Bülteni – 30 | Shelter&meal\Evacuation   | 1 | 1 | 1 | 1: 2164 | 1: 2170 |
| Kahramanmaraş'ta<br>Meydana Gelen<br>Deprem Hk. Basın<br>Bülteni – 30 | Response\Coast guard&Navy | 1 | 1 | 1 | 1: 2181 | 1: 2196 |
| Kahramanmaraş'ta<br>Meydana Gelen<br>Deprem Hk. Basın<br>Bülteni – 30 | Response\Coast guard&Navy | 1 | 1 | 1 | 1: 2181 | 1: 2196 |
| Kahramanmaraş'ta<br>Meydana Gelen<br>Deprem Hk. Basın<br>Bülteni – 30 | Response\Coast guard&Navy | 1 | 1 | 1 | 1: 2225 | 1: 2238 |
| Kahramanmaraş'ta<br>Meydana Gelen<br>Deprem Hk. Basın<br>Bülteni – 30 | Response\Coast guard&Navy | 1 | 1 | 1 | 1: 2225 | 1: 2238 |
| Kahramanmaraş'ta<br>Meydana Gelen<br>Deprem Hk. Basın<br>Bülteni – 30 | Disaster                  | 1 | 1 | 1 | 1: 2315 | 1: 2318 |
| Kahramanmaraş'ta<br>Meydana Gelen<br>Deprem Hk. Basın<br>Bülteni – 30 | Disaster                  | 1 | 1 | 1 | 1: 2315 | 1: 2318 |
| Kahramanmaraş'ta<br>Meydana Gelen<br>Deprem Hk. Basın<br>Bülteni – 30 | Shelter&meal\Sheltering   | 1 | 1 | 1 | 1: 2320 | 1: 2326 |
| Kahramanmaraş'ta<br>Meydana Gelen<br>Deprem Hk. Basın<br>Bülteni – 30 | Shelter&meal\Sheltering   | 1 | 1 | 1 | 1: 2320 | 1: 2326 |
| Kahramanmaraş'ta<br>Meydana Gelen<br>Deprem Hk. Basın<br>Bülteni – 30 | Earthquake                | 1 | 1 | 1 | 1: 2335 | 1: 2340 |
| Kahramanmaraş'ta<br>Meydana Gelen<br>Deprem Hk. Basın<br>Bülteni – 30 | Earthquake                | 1 | 1 | 1 | 1: 2335 | 1: 2340 |

|                                                                       |                             |   |   |   |         |         |
|-----------------------------------------------------------------------|-----------------------------|---|---|---|---------|---------|
| Kahramanmaraş'ta<br>Meydana Gelen<br>Deprem Hk. Basın<br>Bülteni – 30 | AFAD                        | 1 | 1 | 1 | 1: 2381 | 1: 2384 |
| Kahramanmaraş'ta<br>Meydana Gelen<br>Deprem Hk. Basın<br>Bülteni – 30 | AFAD                        | 1 | 1 | 1 | 1: 2381 | 1: 2384 |
| Kahramanmaraş'ta<br>Meydana Gelen<br>Deprem Hk. Basın<br>Bülteni – 30 | Response\Welfare service    | 1 | 1 | 1 | 1: 2395 | 1: 2407 |
| Kahramanmaraş'ta<br>Meydana Gelen<br>Deprem Hk. Basın<br>Bülteni – 30 | Response\Welfare service    | 1 | 1 | 1 | 1: 2395 | 1: 2407 |
| Kahramanmaraş'ta<br>Meydana Gelen<br>Deprem Hk. Basın<br>Bülteni – 30 | Shelter&meal\Tent           | 1 | 1 | 1 | 1: 2538 | 1: 2542 |
| Kahramanmaraş'ta<br>Meydana Gelen<br>Deprem Hk. Basın<br>Bülteni – 30 | Shelter&meal\Tent           | 1 | 1 | 1 | 1: 2538 | 1: 2542 |
| Kahramanmaraş'ta<br>Meydana Gelen<br>Deprem Hk. Basın<br>Bülteni – 30 | Shelter&meal\Container      | 1 | 1 | 1 | 1: 2552 | 1: 2560 |
| Kahramanmaraş'ta<br>Meydana Gelen<br>Deprem Hk. Basın<br>Bülteni – 30 | Shelter&meal\Container      | 1 | 1 | 1 | 1: 2552 | 1: 2560 |
| Kahramanmaraş'ta<br>Meydana Gelen<br>Deprem Hk. Basın<br>Bülteni – 30 | Disaster                    | 1 | 1 | 1 | 1: 2603 | 1: 2606 |
| Kahramanmaraş'ta<br>Meydana Gelen<br>Deprem Hk. Basın<br>Bülteni – 30 | Disaster                    | 1 | 1 | 1 | 1: 2603 | 1: 2606 |
| Kahramanmaraş'ta<br>Meydana Gelen<br>Deprem Hk. Basın<br>Bülteni – 30 | AFAD                        | 1 | 1 | 1 | 1: 2633 | 1: 2636 |
| Kahramanmaraş'ta<br>Meydana Gelen<br>Deprem Hk. Basın<br>Bülteni – 30 | AFAD                        | 1 | 1 | 1 | 1: 2633 | 1: 2636 |
| Kahramanmaraş'ta<br>Meydana Gelen<br>Deprem Hk. Basın<br>Bülteni – 30 | Response\Military           | 1 | 1 | 1 | 1: 2644 | 1: 2651 |
| Kahramanmaraş'ta<br>Meydana Gelen<br>Deprem Hk. Basın<br>Bülteni – 30 | Response\Military           | 1 | 1 | 1 | 1: 2644 | 1: 2651 |
| Kahramanmaraş'ta<br>Meydana Gelen<br>Deprem Hk. Basın<br>Bülteni – 30 | Coordination\NGO            | 1 | 1 | 1 | 1: 2656 | 1: 2667 |
| Kahramanmaraş'ta<br>Meydana Gelen<br>Deprem Hk. Basın<br>Bülteni – 30 | Coordination\NGO            | 1 | 1 | 1 | 1: 2656 | 1: 2667 |
| Kahramanmaraş'ta<br>Meydana Gelen<br>Deprem Hk. Basın<br>Bülteni – 30 | Shelter&meal\Mobile kitchen | 1 | 1 | 1 | 1: 2748 | 1: 2759 |
| Kahramanmaraş'ta<br>Meydana Gelen<br>Deprem Hk. Basın<br>Bülteni – 30 | Shelter&meal\Mobile kitchen | 1 | 1 | 1 | 1: 2748 | 1: 2759 |
| Kahramanmaraş'ta<br>Meydana Gelen<br>Deprem Hk. Basın<br>Bülteni – 30 | Shelter&meal\Mobile bakery  | 1 | 1 | 1 | 1: 2782 | 1: 2792 |
| Kahramanmaraş'ta<br>Meydana Gelen<br>Deprem Hk. Basın<br>Bülteni – 30 | Shelter&meal\Mobile bakery  | 1 | 1 | 1 | 1: 2782 | 1: 2792 |

|                                                                       |                               |   |   |   |         |         |
|-----------------------------------------------------------------------|-------------------------------|---|---|---|---------|---------|
| Kahramanmaraş'ta<br>Meydana Gelen<br>Deprem Hk. Basın<br>Bülteni – 30 | Disaster                      | 1 | 1 | 1 | 1: 2840 | 1: 2843 |
| Kahramanmaraş'ta<br>Meydana Gelen<br>Deprem Hk. Basın<br>Bülteni – 30 | Disaster                      | 1 | 1 | 1 | 1: 2840 | 1: 2843 |
| Kahramanmaraş'ta<br>Meydana Gelen<br>Deprem Hk. Basın<br>Bülteni – 30 | Shelter&meal\Hot meal         | 1 | 1 | 1 | 1: 2867 | 1: 2877 |
| Kahramanmaraş'ta<br>Meydana Gelen<br>Deprem Hk. Basın<br>Bülteni – 30 | Shelter&meal\Hot meal         | 1 | 1 | 1 | 1: 2867 | 1: 2877 |
| Kahramanmaraş'ta<br>Meydana Gelen<br>Deprem Hk. Basın<br>Bülteni – 30 | Disaster                      | 1 | 1 | 1 | 1: 3000 | 1: 3003 |
| Kahramanmaraş'ta<br>Meydana Gelen<br>Deprem Hk. Basın<br>Bülteni – 30 | Disaster                      | 1 | 1 | 1 | 1: 3000 | 1: 3003 |
| Kahramanmaraş'ta<br>Meydana Gelen<br>Deprem Hk. Basın<br>Bülteni – 30 | Response\Psychosocial support | 1 | 1 | 1 | 1: 3005 | 1: 3015 |
| Kahramanmaraş'ta<br>Meydana Gelen<br>Deprem Hk. Basın<br>Bülteni – 30 | Response\Psychosocial support | 1 | 1 | 1 | 1: 3005 | 1: 3015 |
| Kahramanmaraş'ta<br>Meydana Gelen<br>Deprem Hk. Basın<br>Bülteni – 30 | Response\Welfare service      | 1 | 1 | 1 | 1: 3039 | 1: 3051 |
| Kahramanmaraş'ta<br>Meydana Gelen<br>Deprem Hk. Basın<br>Bülteni – 30 | Response\Welfare service      | 1 | 1 | 1 | 1: 3039 | 1: 3051 |
| Kahramanmaraş'ta<br>Meydana Gelen<br>Deprem Hk. Basın<br>Bülteni – 30 | Kahramanmaraş                 | 1 | 0 | 0 | 1: 3062 | 1: 3074 |
| Kahramanmaraş'ta<br>Meydana Gelen<br>Deprem Hk. Basın<br>Bülteni – 30 | Pazarcık                      | 0 | 1 | 0 | 1: 3062 | 1: 3074 |
| Kahramanmaraş'ta<br>Meydana Gelen<br>Deprem Hk. Basın<br>Bülteni – 30 | Earthquake                    | 1 | 1 | 1 | 1: 3187 | 1: 3192 |
| Kahramanmaraş'ta<br>Meydana Gelen<br>Deprem Hk. Basın<br>Bülteni – 30 | Earthquake                    | 1 | 1 | 1 | 1: 3187 | 1: 3192 |
| Kahramanmaraş'ta<br>Meydana Gelen<br>Deprem Hk. Basın<br>Bülteni – 30 | Earthquake                    | 1 | 1 | 1 | 1: 3214 | 1: 3219 |
| Kahramanmaraş'ta<br>Meydana Gelen<br>Deprem Hk. Basın<br>Bülteni – 30 | Earthquake                    | 1 | 1 | 1 | 1: 3214 | 1: 3219 |
| Kahramanmaraş'ta<br>Meydana Gelen<br>Deprem Hk. Basın<br>Bülteni – 30 | Response\Psychosocial support | 1 | 1 | 1 | 1: 3278 | 1: 3288 |
| Kahramanmaraş'ta<br>Meydana Gelen<br>Deprem Hk. Basın<br>Bülteni – 30 | Response\Psychosocial support | 1 | 1 | 1 | 1: 3278 | 1: 3288 |
| Kahramanmaraş'ta<br>Meydana Gelen<br>Deprem Hk. Basın<br>Bülteni – 30 | Kahramanmaraş                 | 1 | 0 | 0 | 2: 17   | 2: 29   |
| Kahramanmaraş'ta<br>Meydana Gelen<br>Deprem Hk. Basın<br>Bülteni – 30 | Pazarcık                      | 0 | 1 | 0 | 2: 17   | 2: 29   |

|                                                                       |                               |   |   |   |        |        |
|-----------------------------------------------------------------------|-------------------------------|---|---|---|--------|--------|
| Kahramanmaraş'ta<br>Meydana Gelen<br>Deprem Hk. Basın<br>Bülteni – 30 | Earthquake                    | 1 | 1 | 1 | 2: 48  | 2: 53  |
| Kahramanmaraş'ta<br>Meydana Gelen<br>Deprem Hk. Basın<br>Bülteni – 30 | Earthquake                    | 1 | 1 | 1 | 2: 48  | 2: 53  |
| Kahramanmaraş'ta<br>Meydana Gelen<br>Deprem Hk. Basın<br>Bülteni – 30 | AFAD                          | 1 | 1 | 1 | 2: 94  | 2: 97  |
| Kahramanmaraş'ta<br>Meydana Gelen<br>Deprem Hk. Basın<br>Bülteni – 30 | AFAD                          | 1 | 1 | 1 | 2: 94  | 2: 97  |
| Kahramanmaraş'ta<br>Meydana Gelen<br>Deprem Hk. Basın<br>Bülteni – 30 | Earthquake                    | 1 | 1 | 1 | 2: 136 | 2: 141 |
| Kahramanmaraş'ta<br>Meydana Gelen<br>Deprem Hk. Basın<br>Bülteni – 30 | Earthquake                    | 1 | 1 | 1 | 2: 136 | 2: 141 |
| Kahramanmaraş'ta<br>Meydana Gelen<br>Deprem Hk. Basın<br>Bülteni – 30 | Disaster                      | 1 | 1 | 1 | 2: 295 | 2: 298 |
| Kahramanmaraş'ta<br>Meydana Gelen<br>Deprem Hk. Basın<br>Bülteni – 30 | Disaster                      | 1 | 1 | 1 | 2: 295 | 2: 298 |
| Kahramanmaraş'ta<br>Meydana Gelen<br>Deprem Hk. Basın<br>Bülteni – 30 | Coordination\Public relations | 1 | 1 | 1 | 2: 454 | 2: 459 |
| Kahramanmaraş'ta<br>Meydana Gelen<br>Deprem Hk. Basın<br>Bülteni – 30 | Coordination\Public relations | 1 | 1 | 1 | 2: 454 | 2: 459 |
| Kahramanmaraş'ta<br>Meydana Gelen<br>Deprem Hk. Basın<br>Bülteni – 30 | AFAD                          | 1 | 1 | 1 | 2: 494 | 2: 497 |
| Kahramanmaraş'ta<br>Meydana Gelen<br>Deprem Hk. Basın<br>Bülteni – 30 | AFAD                          | 1 | 1 | 1 | 2: 494 | 2: 497 |
| Kahramanmaraş'ta<br>Meydana Gelen<br>Deprem Hk. Basın<br>Bülteni – 30 | AFAD                          | 1 | 1 | 1 | 2: 552 | 2: 555 |
| Kahramanmaraş'ta<br>Meydana Gelen<br>Deprem Hk. Basın<br>Bülteni – 30 | AFAD                          | 1 | 1 | 1 | 2: 552 | 2: 555 |
| Kahramanmaraş'ta<br>Meydana Gelen<br>Deprem Hk. Basın<br>Bülteni – 30 | AFAD                          | 1 | 1 | 1 | 2: 669 | 2: 672 |
| Kahramanmaraş'ta<br>Meydana Gelen<br>Deprem Hk. Basın<br>Bülteni – 30 | AFAD                          | 1 | 1 | 1 | 2: 669 | 2: 672 |
| Kahramanmaraş'ta<br>Meydana Gelen<br>Deprem Hk. Basın<br>Bülteni – 30 | Response\Search&Rescue        | 1 | 1 | 1 | 2: 763 | 2: 776 |
| Kahramanmaraş'ta<br>Meydana Gelen<br>Deprem Hk. Basın<br>Bülteni – 30 | Response\Search&Rescue        | 1 | 1 | 1 | 2: 763 | 2: 776 |
| Kahramanmaraş'ta<br>Meydana Gelen<br>Deprem Hk. Basın<br>Bülteni – 30 | Disaster                      | 1 | 1 | 1 | 2: 827 | 2: 830 |
| Kahramanmaraş'ta<br>Meydana Gelen<br>Deprem Hk. Basın<br>Bülteni – 30 | Disaster                      | 1 | 1 | 1 | 2: 827 | 2: 830 |

|                                                                       |                                 |   |   |   |         |         |
|-----------------------------------------------------------------------|---------------------------------|---|---|---|---------|---------|
| Kahramanmaraş'ta<br>Meydana Gelen<br>Deprem Hk. Basın<br>Bülteni – 30 | AFAD                            | 1 | 1 | 1 | 2: 845  | 2: 848  |
| Kahramanmaraş'ta<br>Meydana Gelen<br>Deprem Hk. Basın<br>Bülteni – 30 | AFAD                            | 1 | 1 | 1 | 2: 845  | 2: 848  |
| Kahramanmaraş'ta<br>Meydana Gelen<br>Deprem Hk. Basın<br>Bülteni – 30 | Preparedness\Preparedness       | 1 | 1 | 1 | 2: 909  | 2: 919  |
| Kahramanmaraş'ta<br>Meydana Gelen<br>Deprem Hk. Basın<br>Bülteni – 30 | Preparedness\Preparedness       | 1 | 1 | 1 | 2: 909  | 2: 919  |
| Kahramanmaraş'ta<br>Meydana Gelen<br>Deprem Hk. Basın<br>Bülteni – 30 | Disaster                        | 1 | 1 | 1 | 2: 909  | 2: 912  |
| Kahramanmaraş'ta<br>Meydana Gelen<br>Deprem Hk. Basın<br>Bülteni – 30 | Disaster                        | 1 | 1 | 1 | 2: 909  | 2: 912  |
| Kahramanmaraş'ta<br>Meydana Gelen<br>Deprem Hk. Basın<br>Bülteni – 30 | Disaster                        | 1 | 1 | 1 | 2: 957  | 2: 960  |
| Kahramanmaraş'ta<br>Meydana Gelen<br>Deprem Hk. Basın<br>Bülteni – 30 | Disaster                        | 1 | 1 | 1 | 2: 957  | 2: 960  |
| Kahramanmaraş'ta<br>Meydana Gelen<br>Deprem Hk. Basın<br>Bülteni – 30 | Recovery\Fund drive             | 1 | 1 | 1 | 2: 1018 | 2: 1036 |
| Kahramanmaraş'ta<br>Meydana Gelen<br>Deprem Hk. Basın<br>Bülteni – 30 | Recovery\Fund drive             | 1 | 1 | 1 | 2: 1018 | 2: 1036 |
| Kahramanmaraş'ta<br>Meydana Gelen<br>Deprem Hk. Basın<br>Bülteni – 30 | Coordination\Social media       | 1 | 0 | 0 | 2: 1134 | 2: 1145 |
| Kahramanmaraş'ta<br>Meydana Gelen<br>Deprem Hk. Basın<br>Bülteni – 30 | Coordination\Social media usage | 0 | 1 | 0 | 2: 1134 | 2: 1145 |
| Kahramanmaraş'ta<br>Meydana Gelen<br>Deprem Hk. Basın<br>Bülteni – 30 | AFAD                            | 1 | 1 | 1 | 2: 1190 | 2: 1193 |
| Kahramanmaraş'ta<br>Meydana Gelen<br>Deprem Hk. Basın<br>Bülteni – 30 | AFAD                            | 1 | 1 | 1 | 2: 1190 | 2: 1193 |
| Kahramanmaraş'ta<br>Meydana Gelen<br>Deprem Hk. Basın<br>Bülteni – 30 | AFAD                            | 1 | 1 | 1 | 2: 1212 | 2: 1215 |
| Kahramanmaraş'ta<br>Meydana Gelen<br>Deprem Hk. Basın<br>Bülteni – 30 | AFAD                            | 1 | 1 | 1 | 2: 1212 | 2: 1215 |
| Kahramanmaraş'ta<br>Meydana Gelen<br>Deprem Hk. Basın<br>Bülteni – 30 | Coordination\Information        | 1 | 1 | 1 | 2: 1257 | 2: 1268 |
| Kahramanmaraş'ta<br>Meydana Gelen<br>Deprem Hk. Basın<br>Bülteni – 30 | Coordination\Information        | 1 | 1 | 1 | 2: 1257 | 2: 1268 |
| Kahramanmaraş'ta<br>Meydana Gelen<br>Deprem Hk. Basın<br>Bülteni – 30 | Recovery\Peacemaking            | 1 | 1 | 1 | 2: 1273 | 2: 1282 |
| Kahramanmaraş'ta<br>Meydana Gelen<br>Deprem Hk. Basın<br>Bülteni – 30 | Recovery\Peacemaking            | 1 | 1 | 1 | 2: 1273 | 2: 1282 |

|                                                                       |                                 |   |   |   |         |         |
|-----------------------------------------------------------------------|---------------------------------|---|---|---|---------|---------|
| Kahramanmaraş'ta<br>Meydana Gelen<br>Deprem Hk. Basın<br>Bülteni – 30 | Coordination\Social media       | 1 | 0 | 0 | 2: 1329 | 2: 1340 |
| Kahramanmaraş'ta<br>Meydana Gelen<br>Deprem Hk. Basın<br>Bülteni – 30 | Coordination\Social media usage | 0 | 1 | 0 | 2: 1329 | 2: 1340 |
| Kahramanmaraş'ta<br>Meydana Gelen<br>Deprem Hk. Basın<br>Bülteni – 30 | Disaster                        | 1 | 1 | 1 | 2: 1466 | 2: 1469 |
| Kahramanmaraş'ta<br>Meydana Gelen<br>Deprem Hk. Basın<br>Bülteni – 30 | Disaster                        | 1 | 1 | 1 | 2: 1466 | 2: 1469 |
| Kahramanmaraş'ta<br>Meydana Gelen<br>Deprem Hk. Basın<br>Bülteni – 30 | Emergency                       | 1 | 1 | 1 | 2: 1474 | 2: 1483 |
| Kahramanmaraş'ta<br>Meydana Gelen<br>Deprem Hk. Basın<br>Bülteni – 30 | Emergency                       | 1 | 1 | 1 | 2: 1474 | 2: 1483 |
| Kahramanmaraş'ta<br>Meydana Gelen<br>Deprem Hk. Basın<br>Bülteni – 32 | Kahramanmaraş                   | 1 | 0 | 0 | 1: 17   | 1: 29   |
| Kahramanmaraş'ta<br>Meydana Gelen<br>Deprem Hk. Basın<br>Bülteni – 32 | Pazarcık                        | 0 | 1 | 0 | 1: 17   | 1: 29   |
| Kahramanmaraş'ta<br>Meydana Gelen<br>Deprem Hk. Basın<br>Bülteni – 32 | Earthquake                      | 1 | 1 | 1 | 1: 48   | 1: 53   |
| Kahramanmaraş'ta<br>Meydana Gelen<br>Deprem Hk. Basın<br>Bülteni – 32 | Earthquake                      | 1 | 1 | 1 | 1: 48   | 1: 53   |
| Kahramanmaraş'ta<br>Meydana Gelen<br>Deprem Hk. Basın<br>Bülteni – 32 | AFAD                            | 1 | 1 | 1 | 1: 94   | 1: 97   |
| Kahramanmaraş'ta<br>Meydana Gelen<br>Deprem Hk. Basın<br>Bülteni – 32 | AFAD                            | 1 | 1 | 1 | 1: 94   | 1: 97   |
| Kahramanmaraş'ta<br>Meydana Gelen<br>Deprem Hk. Basın<br>Bülteni – 32 | Earthquake                      | 1 | 1 | 1 | 1: 136  | 1: 141  |
| Kahramanmaraş'ta<br>Meydana Gelen<br>Deprem Hk. Basın<br>Bülteni – 32 | Earthquake                      | 1 | 1 | 1 | 1: 136  | 1: 141  |
| Kahramanmaraş'ta<br>Meydana Gelen<br>Deprem Hk. Basın<br>Bülteni – 32 | Kahramanmaraş                   | 1 | 0 | 0 | 1: 171  | 1: 183  |
| Kahramanmaraş'ta<br>Meydana Gelen<br>Deprem Hk. Basın<br>Bülteni – 32 | Pazarcık                        | 0 | 1 | 0 | 1: 171  | 1: 183  |
| Kahramanmaraş'ta<br>Meydana Gelen<br>Deprem Hk. Basın<br>Bülteni – 32 | Earthquake                      | 1 | 1 | 1 | 1: 202  | 1: 207  |
| Kahramanmaraş'ta<br>Meydana Gelen<br>Deprem Hk. Basın<br>Bülteni – 32 | Earthquake                      | 1 | 1 | 1 | 1: 202  | 1: 207  |
| Kahramanmaraş'ta<br>Meydana Gelen<br>Deprem Hk. Basın<br>Bülteni – 32 | Kahramanmaraş                   | 1 | 0 | 0 | 1: 286  | 1: 298  |
| Kahramanmaraş'ta<br>Meydana Gelen<br>Deprem Hk. Basın<br>Bülteni – 32 | Pazarcık                        | 0 | 1 | 0 | 1: 286  | 1: 298  |

|                                                                       |                           |   |   |   |        |        |
|-----------------------------------------------------------------------|---------------------------|---|---|---|--------|--------|
| Kahramanmaraş'ta<br>Meydana Gelen<br>Deprem Hk. Basın<br>Bülteni – 32 | Earthquake                | 1 | 1 | 1 | 1: 317 | 1: 322 |
| Kahramanmaraş'ta<br>Meydana Gelen<br>Deprem Hk. Basın<br>Bülteni – 32 | Earthquake                | 1 | 1 | 1 | 1: 317 | 1: 322 |
| Kahramanmaraş'ta<br>Meydana Gelen<br>Deprem Hk. Basın<br>Bülteni – 32 | Kahramanmaraş             | 1 | 0 | 0 | 1: 383 | 1: 395 |
| Kahramanmaraş'ta<br>Meydana Gelen<br>Deprem Hk. Basın<br>Bülteni – 32 | Pazarcık                  | 0 | 1 | 0 | 1: 383 | 1: 395 |
| Kahramanmaraş'ta<br>Meydana Gelen<br>Deprem Hk. Basın<br>Bülteni – 32 | Earthquake                | 1 | 1 | 1 | 1: 478 | 1: 483 |
| Kahramanmaraş'ta<br>Meydana Gelen<br>Deprem Hk. Basın<br>Bülteni – 32 | Earthquake                | 1 | 1 | 1 | 1: 478 | 1: 483 |
| Kahramanmaraş'ta<br>Meydana Gelen<br>Deprem Hk. Basın<br>Bülteni – 32 | Earthquake                | 1 | 1 | 1 | 1: 505 | 1: 510 |
| Kahramanmaraş'ta<br>Meydana Gelen<br>Deprem Hk. Basın<br>Bülteni – 32 | Earthquake                | 1 | 1 | 1 | 1: 505 | 1: 510 |
| Kahramanmaraş'ta<br>Meydana Gelen<br>Deprem Hk. Basın<br>Bülteni – 32 | Earthquake                | 1 | 1 | 1 | 1: 538 | 1: 543 |
| Kahramanmaraş'ta<br>Meydana Gelen<br>Deprem Hk. Basın<br>Bülteni – 32 | Earthquake                | 1 | 1 | 1 | 1: 538 | 1: 543 |
| Kahramanmaraş'ta<br>Meydana Gelen<br>Deprem Hk. Basın<br>Bülteni – 32 | Kahramanmaraş             | 1 | 0 | 0 | 1: 591 | 1: 603 |
| Kahramanmaraş'ta<br>Meydana Gelen<br>Deprem Hk. Basın<br>Bülteni – 32 | Pazarcık                  | 0 | 1 | 0 | 1: 591 | 1: 603 |
| Kahramanmaraş'ta<br>Meydana Gelen<br>Deprem Hk. Basın<br>Bülteni – 32 | AFAD                      | 1 | 1 | 1 | 1: 769 | 1: 772 |
| Kahramanmaraş'ta<br>Meydana Gelen<br>Deprem Hk. Basın<br>Bülteni – 32 | AFAD                      | 1 | 1 | 1 | 1: 769 | 1: 772 |
| Kahramanmaraş'ta<br>Meydana Gelen<br>Deprem Hk. Basın<br>Bülteni – 32 | Response\Coast guard&Navy | 1 | 1 | 1 | 1: 798 | 1: 811 |
| Kahramanmaraş'ta<br>Meydana Gelen<br>Deprem Hk. Basın<br>Bülteni – 32 | Response\Coast guard&Navy | 1 | 1 | 1 | 1: 798 | 1: 811 |
| Kahramanmaraş'ta<br>Meydana Gelen<br>Deprem Hk. Basın<br>Bülteni – 32 | Response\Number of staff  | 1 | 0 | 0 | 1: 875 | 1: 897 |
| Kahramanmaraş'ta<br>Meydana Gelen<br>Deprem Hk. Basın<br>Bülteni – 32 | Response\Search&Rescue    | 1 | 1 | 1 | 1: 875 | 1: 888 |
| Kahramanmaraş'ta<br>Meydana Gelen<br>Deprem Hk. Basın<br>Bülteni – 32 | Response\Search&Rescue    | 1 | 1 | 1 | 1: 875 | 1: 888 |
| Kahramanmaraş'ta<br>Meydana Gelen<br>Deprem Hk. Basın<br>Bülteni – 32 | Response\Number           | 0 | 1 | 0 | 1: 875 | 1: 897 |



|                                                                       |                          |   |   |   |         |         |
|-----------------------------------------------------------------------|--------------------------|---|---|---|---------|---------|
| Kahramanmaraş'ta<br>Meydana Gelen<br>Deprem Hk. Basın<br>Bülteni – 32 | Response\Number of staff | 1 | 0 | 0 | 1: 926  | 1: 948  |
| Kahramanmaraş'ta<br>Meydana Gelen<br>Deprem Hk. Basın<br>Bülteni – 32 | Response\Search&Rescue   | 1 | 1 | 1 | 1: 926  | 1: 939  |
| Kahramanmaraş'ta<br>Meydana Gelen<br>Deprem Hk. Basın<br>Bülteni – 32 | Response\Search&Rescue   | 1 | 1 | 1 | 1: 926  | 1: 939  |
| Kahramanmaraş'ta<br>Meydana Gelen<br>Deprem Hk. Basın<br>Bülteni – 32 | Response\Number          | 0 | 1 | 0 | 1: 926  | 1: 948  |
| Kahramanmaraş'ta<br>Meydana Gelen<br>Deprem Hk. Basın<br>Bülteni – 32 | Response\Number of staff | 1 | 0 | 0 | 1: 1070 | 1: 1092 |
| Kahramanmaraş'ta<br>Meydana Gelen<br>Deprem Hk. Basın<br>Bülteni – 32 | Response\Search&Rescue   | 1 | 1 | 1 | 1: 1070 | 1: 1083 |
| Kahramanmaraş'ta<br>Meydana Gelen<br>Deprem Hk. Basın<br>Bülteni – 32 | Response\Search&Rescue   | 1 | 1 | 1 | 1: 1070 | 1: 1083 |
| Kahramanmaraş'ta<br>Meydana Gelen<br>Deprem Hk. Basın<br>Bülteni – 32 | Response\Number          | 0 | 1 | 0 | 1: 1070 | 1: 1092 |
| Kahramanmaraş'ta<br>Meydana Gelen<br>Deprem Hk. Basın<br>Bülteni – 32 | AFAD                     | 1 | 1 | 1 | 1: 1122 | 1: 1125 |
| Kahramanmaraş'ta<br>Meydana Gelen<br>Deprem Hk. Basın<br>Bülteni – 32 | AFAD                     | 1 | 1 | 1 | 1: 1122 | 1: 1125 |
| Kahramanmaraş'ta<br>Meydana Gelen<br>Deprem Hk. Basın<br>Bülteni – 32 | Response\Military        | 1 | 1 | 1 | 1: 1137 | 1: 1144 |
| Kahramanmaraş'ta<br>Meydana Gelen<br>Deprem Hk. Basın<br>Bülteni – 32 | Response\Military        | 1 | 1 | 1 | 1: 1137 | 1: 1144 |
| Kahramanmaraş'ta<br>Meydana Gelen<br>Deprem Hk. Basın<br>Bülteni – 32 | Response\Number of staff | 1 | 0 | 0 | 1: 1280 | 1: 1294 |
| Kahramanmaraş'ta<br>Meydana Gelen<br>Deprem Hk. Basın<br>Bülteni – 32 | Response\Number          | 0 | 1 | 0 | 1: 1280 | 1: 1294 |
| Kahramanmaraş'ta<br>Meydana Gelen<br>Deprem Hk. Basın<br>Bülteni – 32 | Response\Number of staff | 1 | 0 | 0 | 1: 1336 | 1: 1350 |
| Kahramanmaraş'ta<br>Meydana Gelen<br>Deprem Hk. Basın<br>Bülteni – 32 | Response\Number          | 0 | 1 | 0 | 1: 1336 | 1: 1350 |
| Kahramanmaraş'ta<br>Meydana Gelen<br>Deprem Hk. Basın<br>Bülteni – 32 | Disaster                 | 1 | 1 | 1 | 1: 1368 | 1: 1371 |
| Kahramanmaraş'ta<br>Meydana Gelen<br>Deprem Hk. Basın<br>Bülteni – 32 | Disaster                 | 1 | 1 | 1 | 1: 1368 | 1: 1371 |
| Kahramanmaraş'ta<br>Meydana Gelen<br>Deprem Hk. Basın<br>Bülteni – 32 | Disaster                 | 1 | 1 | 1 | 1: 1533 | 1: 1536 |
| Kahramanmaraş'ta<br>Meydana Gelen<br>Deprem Hk. Basın<br>Bülteni – 32 | Disaster                 | 1 | 1 | 1 | 1: 1533 | 1: 1536 |

|                                                                       |                           |   |   |   |         |         |
|-----------------------------------------------------------------------|---------------------------|---|---|---|---------|---------|
| Kahramanmaraş'ta<br>Meydana Gelen<br>Deprem Hk. Basın<br>Bülteni – 32 | AFAD                      | 1 | 1 | 1 | 1: 1585 | 1: 1588 |
| Kahramanmaraş'ta<br>Meydana Gelen<br>Deprem Hk. Basın<br>Bülteni – 32 | AFAD                      | 1 | 1 | 1 | 1: 1585 | 1: 1588 |
| Kahramanmaraş'ta<br>Meydana Gelen<br>Deprem Hk. Basın<br>Bülteni – 32 | Coordination\Coordination | 1 | 1 | 1 | 1: 1677 | 1: 1688 |
| Kahramanmaraş'ta<br>Meydana Gelen<br>Deprem Hk. Basın<br>Bülteni – 32 | Coordination\Coordination | 1 | 1 | 1 | 1: 1677 | 1: 1688 |
| Kahramanmaraş'ta<br>Meydana Gelen<br>Deprem Hk. Basın<br>Bülteni – 32 | Response\Coast guard&Navy | 1 | 1 | 1 | 1: 1879 | 1: 1894 |
| Kahramanmaraş'ta<br>Meydana Gelen<br>Deprem Hk. Basın<br>Bülteni – 32 | Response\Coast guard&Navy | 1 | 1 | 1 | 1: 1879 | 1: 1894 |
| Kahramanmaraş'ta<br>Meydana Gelen<br>Deprem Hk. Basın<br>Bülteni – 32 | Response\Coast guard&Navy | 1 | 1 | 1 | 1: 1897 | 1: 1910 |
| Kahramanmaraş'ta<br>Meydana Gelen<br>Deprem Hk. Basın<br>Bülteni – 32 | Response\Coast guard&Navy | 1 | 1 | 1 | 1: 1897 | 1: 1910 |
| Kahramanmaraş'ta<br>Meydana Gelen<br>Deprem Hk. Basın<br>Bülteni – 32 | Response\Military         | 1 | 1 | 1 | 1: 1926 | 1: 1933 |
| Kahramanmaraş'ta<br>Meydana Gelen<br>Deprem Hk. Basın<br>Bülteni – 32 | Response\Military         | 1 | 1 | 1 | 1: 1926 | 1: 1933 |
| Kahramanmaraş'ta<br>Meydana Gelen<br>Deprem Hk. Basın<br>Bülteni – 32 | Shelter&meal\Evacuation   | 1 | 1 | 1 | 1: 2156 | 1: 2162 |
| Kahramanmaraş'ta<br>Meydana Gelen<br>Deprem Hk. Basın<br>Bülteni – 32 | Shelter&meal\Evacuation   | 1 | 1 | 1 | 1: 2156 | 1: 2162 |
| Kahramanmaraş'ta<br>Meydana Gelen<br>Deprem Hk. Basın<br>Bülteni – 32 | Response\Coast guard&Navy | 1 | 1 | 1 | 1: 2173 | 1: 2188 |
| Kahramanmaraş'ta<br>Meydana Gelen<br>Deprem Hk. Basın<br>Bülteni – 32 | Response\Coast guard&Navy | 1 | 1 | 1 | 1: 2173 | 1: 2188 |
| Kahramanmaraş'ta<br>Meydana Gelen<br>Deprem Hk. Basın<br>Bülteni – 32 | Response\Coast guard&Navy | 1 | 1 | 1 | 1: 2217 | 1: 2230 |
| Kahramanmaraş'ta<br>Meydana Gelen<br>Deprem Hk. Basın<br>Bülteni – 32 | Response\Coast guard&Navy | 1 | 1 | 1 | 1: 2217 | 1: 2230 |
| Kahramanmaraş'ta<br>Meydana Gelen<br>Deprem Hk. Basın<br>Bülteni – 32 | Disaster                  | 1 | 1 | 1 | 1: 2307 | 1: 2310 |
| Kahramanmaraş'ta<br>Meydana Gelen<br>Deprem Hk. Basın<br>Bülteni – 32 | Disaster                  | 1 | 1 | 1 | 1: 2307 | 1: 2310 |
| Kahramanmaraş'ta<br>Meydana Gelen<br>Deprem Hk. Basın<br>Bülteni – 32 | Shelter&meal\Sheltering   | 1 | 1 | 1 | 1: 2312 | 1: 2318 |
| Kahramanmaraş'ta<br>Meydana Gelen<br>Deprem Hk. Basın<br>Bülteni – 32 | Shelter&meal\Sheltering   | 1 | 1 | 1 | 1: 2312 | 1: 2318 |

|                                                                       |                             |   |   |   |         |         |
|-----------------------------------------------------------------------|-----------------------------|---|---|---|---------|---------|
| Kahramanmaraş'ta<br>Meydana Gelen<br>Deprem Hk. Basın<br>Bülteni – 32 | Shelter&meal\Tent           | 1 | 1 | 1 | 1: 2422 | 1: 2426 |
| Kahramanmaraş'ta<br>Meydana Gelen<br>Deprem Hk. Basın<br>Bülteni – 32 | Shelter&meal\Tent           | 1 | 1 | 1 | 1: 2422 | 1: 2426 |
| Kahramanmaraş'ta<br>Meydana Gelen<br>Deprem Hk. Basın<br>Bülteni – 32 | Shelter&meal\Sheltering     | 1 | 1 | 1 | 1: 2582 | 1: 2588 |
| Kahramanmaraş'ta<br>Meydana Gelen<br>Deprem Hk. Basın<br>Bülteni – 32 | Shelter&meal\Sheltering     | 1 | 1 | 1 | 1: 2582 | 1: 2588 |
| Kahramanmaraş'ta<br>Meydana Gelen<br>Deprem Hk. Basın<br>Bülteni – 32 | Shelter&meal\Sheltering     | 1 | 1 | 1 | 1: 2606 | 1: 2612 |
| Kahramanmaraş'ta<br>Meydana Gelen<br>Deprem Hk. Basın<br>Bülteni – 32 | Shelter&meal\Sheltering     | 1 | 1 | 1 | 1: 2606 | 1: 2612 |
| Kahramanmaraş'ta<br>Meydana Gelen<br>Deprem Hk. Basın<br>Bülteni – 32 | Disaster                    | 1 | 1 | 1 | 1: 2639 | 1: 2642 |
| Kahramanmaraş'ta<br>Meydana Gelen<br>Deprem Hk. Basın<br>Bülteni – 32 | Disaster                    | 1 | 1 | 1 | 1: 2639 | 1: 2642 |
| Kahramanmaraş'ta<br>Meydana Gelen<br>Deprem Hk. Basın<br>Bülteni – 32 | AFAD                        | 1 | 1 | 1 | 1: 2669 | 1: 2672 |
| Kahramanmaraş'ta<br>Meydana Gelen<br>Deprem Hk. Basın<br>Bülteni – 32 | AFAD                        | 1 | 1 | 1 | 1: 2669 | 1: 2672 |
| Kahramanmaraş'ta<br>Meydana Gelen<br>Deprem Hk. Basın<br>Bülteni – 32 | Response\Military           | 1 | 1 | 1 | 1: 2680 | 1: 2687 |
| Kahramanmaraş'ta<br>Meydana Gelen<br>Deprem Hk. Basın<br>Bülteni – 32 | Response\Military           | 1 | 1 | 1 | 1: 2680 | 1: 2687 |
| Kahramanmaraş'ta<br>Meydana Gelen<br>Deprem Hk. Basın<br>Bülteni – 32 | Coordination\NGO            | 1 | 1 | 1 | 1: 2692 | 1: 2703 |
| Kahramanmaraş'ta<br>Meydana Gelen<br>Deprem Hk. Basın<br>Bülteni – 32 | Coordination\NGO            | 1 | 1 | 1 | 1: 2692 | 1: 2703 |
| Kahramanmaraş'ta<br>Meydana Gelen<br>Deprem Hk. Basın<br>Bülteni – 32 | Shelter&meal\Mobile kitchen | 1 | 1 | 1 | 1: 2789 | 1: 2800 |
| Kahramanmaraş'ta<br>Meydana Gelen<br>Deprem Hk. Basın<br>Bülteni – 32 | Shelter&meal\Mobile kitchen | 1 | 1 | 1 | 1: 2789 | 1: 2800 |
| Kahramanmaraş'ta<br>Meydana Gelen<br>Deprem Hk. Basın<br>Bülteni – 32 | Shelter&meal\Mobile bakery  | 1 | 1 | 1 | 1: 2823 | 1: 2833 |
| Kahramanmaraş'ta<br>Meydana Gelen<br>Deprem Hk. Basın<br>Bülteni – 32 | Shelter&meal\Mobile bakery  | 1 | 1 | 1 | 1: 2823 | 1: 2833 |
| Kahramanmaraş'ta<br>Meydana Gelen<br>Deprem Hk. Basın<br>Bülteni – 32 | Disaster                    | 1 | 1 | 1 | 1: 2959 | 1: 2962 |
| Kahramanmaraş'ta<br>Meydana Gelen<br>Deprem Hk. Basın<br>Bülteni – 32 | Disaster                    | 1 | 1 | 1 | 1: 2959 | 1: 2962 |

|                                                                       |                               |   |   |   |         |         |
|-----------------------------------------------------------------------|-------------------------------|---|---|---|---------|---------|
| Kahramanmaraş'ta<br>Meydana Gelen<br>Deprem Hk. Basın<br>Bülteni – 32 | Shelter&meal\Hot meal         | 1 | 1 | 1 | 1: 2986 | 1: 2996 |
| Kahramanmaraş'ta<br>Meydana Gelen<br>Deprem Hk. Basın<br>Bülteni – 32 | Shelter&meal\Hot meal         | 1 | 1 | 1 | 1: 2986 | 1: 2996 |
| Kahramanmaraş'ta<br>Meydana Gelen<br>Deprem Hk. Basın<br>Bülteni – 32 | Kahramanmaraş                 | 1 | 0 | 0 | 2: 17   | 2: 29   |
| Kahramanmaraş'ta<br>Meydana Gelen<br>Deprem Hk. Basın<br>Bülteni – 32 | Pazarcık                      | 0 | 1 | 0 | 2: 17   | 2: 29   |
| Kahramanmaraş'ta<br>Meydana Gelen<br>Deprem Hk. Basın<br>Bülteni – 32 | Earthquake                    | 1 | 1 | 1 | 2: 48   | 2: 53   |
| Kahramanmaraş'ta<br>Meydana Gelen<br>Deprem Hk. Basın<br>Bülteni – 32 | Earthquake                    | 1 | 1 | 1 | 2: 48   | 2: 53   |
| Kahramanmaraş'ta<br>Meydana Gelen<br>Deprem Hk. Basın<br>Bülteni – 32 | AFAD                          | 1 | 1 | 1 | 2: 94   | 2: 97   |
| Kahramanmaraş'ta<br>Meydana Gelen<br>Deprem Hk. Basın<br>Bülteni – 32 | AFAD                          | 1 | 1 | 1 | 2: 94   | 2: 97   |
| Kahramanmaraş'ta<br>Meydana Gelen<br>Deprem Hk. Basın<br>Bülteni – 32 | Earthquake                    | 1 | 1 | 1 | 2: 136  | 2: 141  |
| Kahramanmaraş'ta<br>Meydana Gelen<br>Deprem Hk. Basın<br>Bülteni – 32 | Earthquake                    | 1 | 1 | 1 | 2: 136  | 2: 141  |
| Kahramanmaraş'ta<br>Meydana Gelen<br>Deprem Hk. Basın<br>Bülteni – 32 | Disaster                      | 1 | 1 | 1 | 2: 171  | 2: 174  |
| Kahramanmaraş'ta<br>Meydana Gelen<br>Deprem Hk. Basın<br>Bülteni – 32 | Disaster                      | 1 | 1 | 1 | 2: 171  | 2: 174  |
| Kahramanmaraş'ta<br>Meydana Gelen<br>Deprem Hk. Basın<br>Bülteni – 32 | Response\Psychosocial support | 1 | 1 | 1 | 2: 176  | 2: 186  |
| Kahramanmaraş'ta<br>Meydana Gelen<br>Deprem Hk. Basın<br>Bülteni – 32 | Response\Psychosocial support | 1 | 1 | 1 | 2: 176  | 2: 186  |
| Kahramanmaraş'ta<br>Meydana Gelen<br>Deprem Hk. Basın<br>Bülteni – 32 | Response\Welfare service      | 1 | 1 | 1 | 2: 210  | 2: 222  |
| Kahramanmaraş'ta<br>Meydana Gelen<br>Deprem Hk. Basın<br>Bülteni – 32 | Response\Welfare service      | 1 | 1 | 1 | 2: 210  | 2: 222  |
| Kahramanmaraş'ta<br>Meydana Gelen<br>Deprem Hk. Basın<br>Bülteni – 32 | Kahramanmaraş                 | 1 | 0 | 0 | 2: 233  | 2: 245  |
| Kahramanmaraş'ta<br>Meydana Gelen<br>Deprem Hk. Basın<br>Bülteni – 32 | Pazarcık                      | 0 | 1 | 0 | 2: 233  | 2: 245  |
| Kahramanmaraş'ta<br>Meydana Gelen<br>Deprem Hk. Basın<br>Bülteni – 32 | Earthquake                    | 1 | 1 | 1 | 2: 308  | 2: 313  |
| Kahramanmaraş'ta<br>Meydana Gelen<br>Deprem Hk. Basın<br>Bülteni – 32 | Earthquake                    | 1 | 1 | 1 | 2: 308  | 2: 313  |

|                                                                       |                               |   |   |   |         |         |
|-----------------------------------------------------------------------|-------------------------------|---|---|---|---------|---------|
| Kahramanmaraş'ta<br>Meydana Gelen<br>Deprem Hk. Basın<br>Bülteni – 32 | Response\Number of staff      | 1 | 0 | 0 | 2: 338  | 2: 352  |
| Kahramanmaraş'ta<br>Meydana Gelen<br>Deprem Hk. Basın<br>Bülteni – 32 | Response\Number               | 0 | 1 | 0 | 2: 338  | 2: 352  |
| Kahramanmaraş'ta<br>Meydana Gelen<br>Deprem Hk. Basın<br>Bülteni – 32 | Earthquake                    | 1 | 1 | 1 | 2: 361  | 2: 366  |
| Kahramanmaraş'ta<br>Meydana Gelen<br>Deprem Hk. Basın<br>Bülteni – 32 | Earthquake                    | 1 | 1 | 1 | 2: 361  | 2: 366  |
| Kahramanmaraş'ta<br>Meydana Gelen<br>Deprem Hk. Basın<br>Bülteni – 32 | Earthquake                    | 1 | 1 | 1 | 2: 430  | 2: 435  |
| Kahramanmaraş'ta<br>Meydana Gelen<br>Deprem Hk. Basın<br>Bülteni – 32 | Earthquake                    | 1 | 1 | 1 | 2: 430  | 2: 435  |
| Kahramanmaraş'ta<br>Meydana Gelen<br>Deprem Hk. Basın<br>Bülteni – 32 | Earthquake                    | 1 | 1 | 1 | 2: 457  | 2: 462  |
| Kahramanmaraş'ta<br>Meydana Gelen<br>Deprem Hk. Basın<br>Bülteni – 32 | Earthquake                    | 1 | 1 | 1 | 2: 457  | 2: 462  |
| Kahramanmaraş'ta<br>Meydana Gelen<br>Deprem Hk. Basın<br>Bülteni – 32 | Response\Psychosocial support | 1 | 1 | 1 | 2: 524  | 2: 534  |
| Kahramanmaraş'ta<br>Meydana Gelen<br>Deprem Hk. Basın<br>Bülteni – 32 | Response\Psychosocial support | 1 | 1 | 1 | 2: 524  | 2: 534  |
| Kahramanmaraş'ta<br>Meydana Gelen<br>Deprem Hk. Basın<br>Bülteni – 32 | Disaster                      | 1 | 1 | 1 | 2: 713  | 2: 716  |
| Kahramanmaraş'ta<br>Meydana Gelen<br>Deprem Hk. Basın<br>Bülteni – 32 | Disaster                      | 1 | 1 | 1 | 2: 713  | 2: 716  |
| Kahramanmaraş'ta<br>Meydana Gelen<br>Deprem Hk. Basın<br>Bülteni – 32 | Coordination\Public relations | 1 | 1 | 1 | 2: 842  | 2: 847  |
| Kahramanmaraş'ta<br>Meydana Gelen<br>Deprem Hk. Basın<br>Bülteni – 32 | Coordination\Public relations | 1 | 1 | 1 | 2: 842  | 2: 847  |
| Kahramanmaraş'ta<br>Meydana Gelen<br>Deprem Hk. Basın<br>Bülteni – 32 | AFAD                          | 1 | 1 | 1 | 2: 882  | 2: 885  |
| Kahramanmaraş'ta<br>Meydana Gelen<br>Deprem Hk. Basın<br>Bülteni – 32 | AFAD                          | 1 | 1 | 1 | 2: 882  | 2: 885  |
| Kahramanmaraş'ta<br>Meydana Gelen<br>Deprem Hk. Basın<br>Bülteni – 32 | AFAD                          | 1 | 1 | 1 | 2: 940  | 2: 943  |
| Kahramanmaraş'ta<br>Meydana Gelen<br>Deprem Hk. Basın<br>Bülteni – 32 | AFAD                          | 1 | 1 | 1 | 2: 940  | 2: 943  |
| Kahramanmaraş'ta<br>Meydana Gelen<br>Deprem Hk. Basın<br>Bülteni – 32 | AFAD                          | 1 | 1 | 1 | 2: 1057 | 2: 1060 |
| Kahramanmaraş'ta<br>Meydana Gelen<br>Deprem Hk. Basın<br>Bülteni – 32 | AFAD                          | 1 | 1 | 1 | 2: 1057 | 2: 1060 |

|                                                                       |                                 |   |   |   |         |         |
|-----------------------------------------------------------------------|---------------------------------|---|---|---|---------|---------|
| Kahramanmaraş'ta<br>Meydana Gelen<br>Deprem Hk. Basın<br>Bülteni – 32 | Response\Search&Rescue          | 1 | 1 | 1 | 2: 1151 | 2: 1164 |
| Kahramanmaraş'ta<br>Meydana Gelen<br>Deprem Hk. Basın<br>Bülteni – 32 | Response\Search&Rescue          | 1 | 1 | 1 | 2: 1151 | 2: 1164 |
| Kahramanmaraş'ta<br>Meydana Gelen<br>Deprem Hk. Basın<br>Bülteni – 32 | Disaster                        | 1 | 1 | 1 | 2: 1215 | 2: 1218 |
| Kahramanmaraş'ta<br>Meydana Gelen<br>Deprem Hk. Basın<br>Bülteni – 32 | Disaster                        | 1 | 1 | 1 | 2: 1215 | 2: 1218 |
| Kahramanmaraş'ta<br>Meydana Gelen<br>Deprem Hk. Basın<br>Bülteni – 32 | AFAD                            | 1 | 1 | 1 | 2: 1233 | 2: 1236 |
| Kahramanmaraş'ta<br>Meydana Gelen<br>Deprem Hk. Basın<br>Bülteni – 32 | AFAD                            | 1 | 1 | 1 | 2: 1233 | 2: 1236 |
| Kahramanmaraş'ta<br>Meydana Gelen<br>Deprem Hk. Basın<br>Bülteni – 32 | Preparedness\Preparedness       | 1 | 1 | 1 | 2: 1297 | 2: 1307 |
| Kahramanmaraş'ta<br>Meydana Gelen<br>Deprem Hk. Basın<br>Bülteni – 32 | Preparedness\Preparedness       | 1 | 1 | 1 | 2: 1297 | 2: 1307 |
| Kahramanmaraş'ta<br>Meydana Gelen<br>Deprem Hk. Basın<br>Bülteni – 32 | Disaster                        | 1 | 1 | 1 | 2: 1297 | 2: 1300 |
| Kahramanmaraş'ta<br>Meydana Gelen<br>Deprem Hk. Basın<br>Bülteni – 32 | Disaster                        | 1 | 1 | 1 | 2: 1297 | 2: 1300 |
| Kahramanmaraş'ta<br>Meydana Gelen<br>Deprem Hk. Basın<br>Bülteni – 32 | Disaster                        | 1 | 1 | 1 | 2: 1345 | 2: 1348 |
| Kahramanmaraş'ta<br>Meydana Gelen<br>Deprem Hk. Basın<br>Bülteni – 32 | Disaster                        | 1 | 1 | 1 | 2: 1345 | 2: 1348 |
| Kahramanmaraş'ta<br>Meydana Gelen<br>Deprem Hk. Basın<br>Bülteni – 32 | Recovery\Fund drive             | 1 | 1 | 1 | 2: 1406 | 2: 1424 |
| Kahramanmaraş'ta<br>Meydana Gelen<br>Deprem Hk. Basın<br>Bülteni – 32 | Recovery\Fund drive             | 1 | 1 | 1 | 2: 1406 | 2: 1424 |
| Kahramanmaraş'ta<br>Meydana Gelen<br>Deprem Hk. Basın<br>Bülteni – 32 | Coordination\Social media       | 1 | 0 | 0 | 2: 1522 | 2: 1533 |
| Kahramanmaraş'ta<br>Meydana Gelen<br>Deprem Hk. Basın<br>Bülteni – 32 | Coordination\Social media usage | 0 | 1 | 0 | 2: 1522 | 2: 1533 |
| Kahramanmaraş'ta<br>Meydana Gelen<br>Deprem Hk. Basın<br>Bülteni – 32 | AFAD                            | 1 | 1 | 1 | 2: 1578 | 2: 1581 |
| Kahramanmaraş'ta<br>Meydana Gelen<br>Deprem Hk. Basın<br>Bülteni – 32 | AFAD                            | 1 | 1 | 1 | 2: 1578 | 2: 1581 |
| Kahramanmaraş'ta<br>Meydana Gelen<br>Deprem Hk. Basın<br>Bülteni – 32 | AFAD                            | 1 | 1 | 1 | 2: 1600 | 2: 1603 |
| Kahramanmaraş'ta<br>Meydana Gelen<br>Deprem Hk. Basın<br>Bülteni – 32 | AFAD                            | 1 | 1 | 1 | 2: 1600 | 2: 1603 |

|                                                                       |                                 |   |   |   |         |         |
|-----------------------------------------------------------------------|---------------------------------|---|---|---|---------|---------|
| Kahramanmaraş'ta<br>Meydana Gelen<br>Deprem Hk. Basın<br>Bülteni – 32 | Coordination\Information        | 1 | 1 | 1 | 2: 1645 | 2: 1656 |
| Kahramanmaraş'ta<br>Meydana Gelen<br>Deprem Hk. Basın<br>Bülteni – 32 | Coordination\Information        | 1 | 1 | 1 | 2: 1645 | 2: 1656 |
| Kahramanmaraş'ta<br>Meydana Gelen<br>Deprem Hk. Basın<br>Bülteni – 32 | Recovery\Peacemaking            | 1 | 1 | 1 | 2: 1661 | 2: 1670 |
| Kahramanmaraş'ta<br>Meydana Gelen<br>Deprem Hk. Basın<br>Bülteni – 32 | Recovery\Peacemaking            | 1 | 1 | 1 | 2: 1661 | 2: 1670 |
| Kahramanmaraş'ta<br>Meydana Gelen<br>Deprem Hk. Basın<br>Bülteni – 32 | Coordination\Social media       | 1 | 0 | 0 | 2: 1717 | 2: 1728 |
| Kahramanmaraş'ta<br>Meydana Gelen<br>Deprem Hk. Basın<br>Bülteni – 32 | Coordination\Social media usage | 0 | 1 | 0 | 2: 1717 | 2: 1728 |
| Kahramanmaraş'ta<br>Meydana Gelen<br>Deprem Hk. Basın<br>Bülteni – 32 | Kahramanmaraş                   | 1 | 0 | 0 | 3: 17   | 3: 29   |
| Kahramanmaraş'ta<br>Meydana Gelen<br>Deprem Hk. Basın<br>Bülteni – 32 | Pazarcık                        | 0 | 1 | 0 | 3: 17   | 3: 29   |
| Kahramanmaraş'ta<br>Meydana Gelen<br>Deprem Hk. Basın<br>Bülteni – 32 | Earthquake                      | 1 | 1 | 1 | 3: 48   | 3: 53   |
| Kahramanmaraş'ta<br>Meydana Gelen<br>Deprem Hk. Basın<br>Bülteni – 32 | Earthquake                      | 1 | 1 | 1 | 3: 48   | 3: 53   |
| Kahramanmaraş'ta<br>Meydana Gelen<br>Deprem Hk. Basın<br>Bülteni – 32 | AFAD                            | 1 | 1 | 1 | 3: 94   | 3: 97   |
| Kahramanmaraş'ta<br>Meydana Gelen<br>Deprem Hk. Basın<br>Bülteni – 32 | AFAD                            | 1 | 1 | 1 | 3: 94   | 3: 97   |
| Kahramanmaraş'ta<br>Meydana Gelen<br>Deprem Hk. Basın<br>Bülteni – 32 | Earthquake                      | 1 | 1 | 1 | 3: 136  | 3: 141  |
| Kahramanmaraş'ta<br>Meydana Gelen<br>Deprem Hk. Basın<br>Bülteni – 32 | Earthquake                      | 1 | 1 | 1 | 3: 136  | 3: 141  |
| Kahramanmaraş'ta<br>Meydana Gelen<br>Deprem Hk. Basın<br>Bülteni – 32 | Disaster                        | 1 | 1 | 1 | 3: 211  | 3: 214  |
| Kahramanmaraş'ta<br>Meydana Gelen<br>Deprem Hk. Basın<br>Bülteni – 32 | Disaster                        | 1 | 1 | 1 | 3: 211  | 3: 214  |
| Kahramanmaraş'ta<br>Meydana Gelen<br>Deprem Hk. Basın<br>Bülteni – 32 | Emergency                       | 1 | 1 | 1 | 3: 219  | 3: 228  |
| Kahramanmaraş'ta<br>Meydana Gelen<br>Deprem Hk. Basın<br>Bülteni – 32 | Emergency                       | 1 | 1 | 1 | 3: 219  | 3: 228  |
| Kahramanmaraş'ta<br>Meydana Gelen<br>Deprem Hk. Basın<br>Bülteni – 18 | Kahramanmaraş                   | 1 | 0 | 0 | 1: 17   | 1: 29   |
| Kahramanmaraş'ta<br>Meydana Gelen<br>Deprem Hk. Basın<br>Bülteni – 18 | Pazarcık                        | 0 | 1 | 0 | 1: 17   | 1: 29   |

|                                                                      |               |   |   |   |        |        |
|----------------------------------------------------------------------|---------------|---|---|---|--------|--------|
| Kahramanmaraş'ta<br>Meydana Gelen<br>Deprem Hk. Basın<br>Bülteni- 18 | Earthquake    | 1 | 1 | 1 | 1: 48  | 1: 53  |
| Kahramanmaraş'ta<br>Meydana Gelen<br>Deprem Hk. Basın<br>Bülteni- 18 | Earthquake    | 1 | 1 | 1 | 1: 48  | 1: 53  |
| Kahramanmaraş'ta<br>Meydana Gelen<br>Deprem Hk. Basın<br>Bülteni- 18 | AFAD          | 1 | 1 | 1 | 1: 93  | 1: 96  |
| Kahramanmaraş'ta<br>Meydana Gelen<br>Deprem Hk. Basın<br>Bülteni- 18 | AFAD          | 1 | 1 | 1 | 1: 93  | 1: 96  |
| Kahramanmaraş'ta<br>Meydana Gelen<br>Deprem Hk. Basın<br>Bülteni- 18 | Earthquake    | 1 | 1 | 1 | 1: 135 | 1: 140 |
| Kahramanmaraş'ta<br>Meydana Gelen<br>Deprem Hk. Basın<br>Bülteni- 18 | Earthquake    | 1 | 1 | 1 | 1: 135 | 1: 140 |
| Kahramanmaraş'ta<br>Meydana Gelen<br>Deprem Hk. Basın<br>Bülteni- 18 | Kahramanmaraş | 1 | 0 | 0 | 1: 170 | 1: 182 |
| Kahramanmaraş'ta<br>Meydana Gelen<br>Deprem Hk. Basın<br>Bülteni- 18 | Pazarcık      | 0 | 1 | 0 | 1: 170 | 1: 182 |
| Kahramanmaraş'ta<br>Meydana Gelen<br>Deprem Hk. Basın<br>Bülteni- 18 | Earthquake    | 1 | 1 | 1 | 1: 201 | 1: 206 |
| Kahramanmaraş'ta<br>Meydana Gelen<br>Deprem Hk. Basın<br>Bülteni- 18 | Earthquake    | 1 | 1 | 1 | 1: 201 | 1: 206 |
| Kahramanmaraş'ta<br>Meydana Gelen<br>Deprem Hk. Basın<br>Bülteni- 18 | Kahramanmaraş | 1 | 0 | 0 | 1: 284 | 1: 296 |
| Kahramanmaraş'ta<br>Meydana Gelen<br>Deprem Hk. Basın<br>Bülteni- 18 | Pazarcık      | 0 | 1 | 0 | 1: 284 | 1: 296 |
| Kahramanmaraş'ta<br>Meydana Gelen<br>Deprem Hk. Basın<br>Bülteni- 18 | Earthquake    | 1 | 1 | 1 | 1: 315 | 1: 320 |
| Kahramanmaraş'ta<br>Meydana Gelen<br>Deprem Hk. Basın<br>Bülteni- 18 | Earthquake    | 1 | 1 | 1 | 1: 315 | 1: 320 |
| Kahramanmaraş'ta<br>Meydana Gelen<br>Deprem Hk. Basın<br>Bülteni- 18 | Kahramanmaraş | 1 | 0 | 0 | 1: 381 | 1: 393 |
| Kahramanmaraş'ta<br>Meydana Gelen<br>Deprem Hk. Basın<br>Bülteni- 18 | Pazarcık      | 0 | 1 | 0 | 1: 381 | 1: 393 |
| Kahramanmaraş'ta<br>Meydana Gelen<br>Deprem Hk. Basın<br>Bülteni- 18 | Earthquake    | 1 | 1 | 1 | 1: 476 | 1: 481 |
| Kahramanmaraş'ta<br>Meydana Gelen<br>Deprem Hk. Basın<br>Bülteni- 18 | Earthquake    | 1 | 1 | 1 | 1: 476 | 1: 481 |
| Kahramanmaraş'ta<br>Meydana Gelen<br>Deprem Hk. Basın<br>Bülteni- 18 | Earthquake    | 1 | 1 | 1 | 1: 503 | 1: 508 |
| Kahramanmaraş'ta<br>Meydana Gelen<br>Deprem Hk. Basın<br>Bülteni- 18 | Earthquake    | 1 | 1 | 1 | 1: 503 | 1: 508 |



|                                                                      |                           |   |   |   |         |         |
|----------------------------------------------------------------------|---------------------------|---|---|---|---------|---------|
| Kahramanmaraş'ta<br>Meydana Gelen<br>Deprem Hk. Basın<br>Bülteni- 18 | Earthquake                | 1 | 1 | 1 | 1: 536  | 1: 541  |
| Kahramanmaraş'ta<br>Meydana Gelen<br>Deprem Hk. Basın<br>Bülteni- 18 | Earthquake                | 1 | 1 | 1 | 1: 536  | 1: 541  |
| Kahramanmaraş'ta<br>Meydana Gelen<br>Deprem Hk. Basın<br>Bülteni- 18 | Kahramanmaraş             | 1 | 0 | 0 | 1: 599  | 1: 611  |
| Kahramanmaraş'ta<br>Meydana Gelen<br>Deprem Hk. Basın<br>Bülteni- 18 | Pazarcık                  | 0 | 1 | 0 | 1: 599  | 1: 611  |
| Kahramanmaraş'ta<br>Meydana Gelen<br>Deprem Hk. Basın<br>Bülteni- 18 | AFAD                      | 1 | 1 | 1 | 1: 809  | 1: 812  |
| Kahramanmaraş'ta<br>Meydana Gelen<br>Deprem Hk. Basın<br>Bülteni- 18 | AFAD                      | 1 | 1 | 1 | 1: 809  | 1: 812  |
| Kahramanmaraş'ta<br>Meydana Gelen<br>Deprem Hk. Basın<br>Bülteni- 18 | Response\Coast guard&Navy | 1 | 1 | 1 | 1: 838  | 1: 851  |
| Kahramanmaraş'ta<br>Meydana Gelen<br>Deprem Hk. Basın<br>Bülteni- 18 | Response\Coast guard&Navy | 1 | 1 | 1 | 1: 838  | 1: 851  |
| Kahramanmaraş'ta<br>Meydana Gelen<br>Deprem Hk. Basın<br>Bülteni- 18 | Response\Number of staff  | 1 | 0 | 0 | 1: 915  | 1: 937  |
| Kahramanmaraş'ta<br>Meydana Gelen<br>Deprem Hk. Basın<br>Bülteni- 18 | Response\Search&Rescue    | 1 | 1 | 1 | 1: 915  | 1: 928  |
| Kahramanmaraş'ta<br>Meydana Gelen<br>Deprem Hk. Basın<br>Bülteni- 18 | Response\Search&Rescue    | 1 | 1 | 1 | 1: 915  | 1: 928  |
| Kahramanmaraş'ta<br>Meydana Gelen<br>Deprem Hk. Basın<br>Bülteni- 18 | Response\Number           | 0 | 1 | 0 | 1: 915  | 1: 937  |
| Kahramanmaraş'ta<br>Meydana Gelen<br>Deprem Hk. Basın<br>Bülteni- 18 | Response\Number of staff  | 1 | 0 | 0 | 1: 966  | 1: 988  |
| Kahramanmaraş'ta<br>Meydana Gelen<br>Deprem Hk. Basın<br>Bülteni- 18 | Response\Search&Rescue    | 1 | 1 | 1 | 1: 966  | 1: 979  |
| Kahramanmaraş'ta<br>Meydana Gelen<br>Deprem Hk. Basın<br>Bülteni- 18 | Response\Search&Rescue    | 1 | 1 | 1 | 1: 966  | 1: 979  |
| Kahramanmaraş'ta<br>Meydana Gelen<br>Deprem Hk. Basın<br>Bülteni- 18 | Response\Number           | 0 | 1 | 0 | 1: 966  | 1: 988  |
| Kahramanmaraş'ta<br>Meydana Gelen<br>Deprem Hk. Basın<br>Bülteni- 18 | Response\Number of staff  | 1 | 0 | 0 | 1: 1089 | 1: 1111 |
| Kahramanmaraş'ta<br>Meydana Gelen<br>Deprem Hk. Basın<br>Bülteni- 18 | Response\Search&Rescue    | 1 | 1 | 1 | 1: 1089 | 1: 1102 |
| Kahramanmaraş'ta<br>Meydana Gelen<br>Deprem Hk. Basın<br>Bülteni- 18 | Response\Search&Rescue    | 1 | 1 | 1 | 1: 1089 | 1: 1102 |
| Kahramanmaraş'ta<br>Meydana Gelen<br>Deprem Hk. Basın<br>Bülteni- 18 | Response\Number           | 0 | 1 | 0 | 1: 1089 | 1: 1111 |

|                                                                      |                           |   |   |   |         |         |
|----------------------------------------------------------------------|---------------------------|---|---|---|---------|---------|
| Kahramanmaraş'ta<br>Meydana Gelen<br>Deprem Hk. Basın<br>Bülteni- 18 | AFAD                      | 1 | 1 | 1 | 1: 1140 | 1: 1143 |
| Kahramanmaraş'ta<br>Meydana Gelen<br>Deprem Hk. Basın<br>Bülteni- 18 | AFAD                      | 1 | 1 | 1 | 1: 1140 | 1: 1143 |
| Kahramanmaraş'ta<br>Meydana Gelen<br>Deprem Hk. Basın<br>Bülteni- 18 | Response\Military         | 1 | 1 | 1 | 1: 1155 | 1: 1162 |
| Kahramanmaraş'ta<br>Meydana Gelen<br>Deprem Hk. Basın<br>Bülteni- 18 | Response\Military         | 1 | 1 | 1 | 1: 1155 | 1: 1162 |
| Kahramanmaraş'ta<br>Meydana Gelen<br>Deprem Hk. Basın<br>Bülteni- 18 | Response\Number of staff  | 1 | 0 | 0 | 1: 1275 | 1: 1289 |
| Kahramanmaraş'ta<br>Meydana Gelen<br>Deprem Hk. Basın<br>Bülteni- 18 | Response\Number           | 0 | 1 | 0 | 1: 1275 | 1: 1289 |
| Kahramanmaraş'ta<br>Meydana Gelen<br>Deprem Hk. Basın<br>Bülteni- 18 | Response\Number of staff  | 1 | 0 | 0 | 1: 1331 | 1: 1345 |
| Kahramanmaraş'ta<br>Meydana Gelen<br>Deprem Hk. Basın<br>Bülteni- 18 | Response\Number           | 0 | 1 | 0 | 1: 1331 | 1: 1345 |
| Kahramanmaraş'ta<br>Meydana Gelen<br>Deprem Hk. Basın<br>Bülteni- 18 | Disaster                  | 1 | 1 | 1 | 1: 1361 | 1: 1364 |
| Kahramanmaraş'ta<br>Meydana Gelen<br>Deprem Hk. Basın<br>Bülteni- 18 | Disaster                  | 1 | 1 | 1 | 1: 1361 | 1: 1364 |
| Kahramanmaraş'ta<br>Meydana Gelen<br>Deprem Hk. Basın<br>Bülteni- 18 | Disaster                  | 1 | 1 | 1 | 1: 1525 | 1: 1528 |
| Kahramanmaraş'ta<br>Meydana Gelen<br>Deprem Hk. Basın<br>Bülteni- 18 | Disaster                  | 1 | 1 | 1 | 1: 1525 | 1: 1528 |
| Kahramanmaraş'ta<br>Meydana Gelen<br>Deprem Hk. Basın<br>Bülteni- 18 | AFAD                      | 1 | 1 | 1 | 1: 1579 | 1: 1582 |
| Kahramanmaraş'ta<br>Meydana Gelen<br>Deprem Hk. Basın<br>Bülteni- 18 | AFAD                      | 1 | 1 | 1 | 1: 1579 | 1: 1582 |
| Kahramanmaraş'ta<br>Meydana Gelen<br>Deprem Hk. Basın<br>Bülteni- 18 | Response\Coast guard&Navy | 1 | 1 | 1 | 1: 1672 | 1: 1685 |
| Kahramanmaraş'ta<br>Meydana Gelen<br>Deprem Hk. Basın<br>Bülteni- 18 | Response\Coast guard&Navy | 1 | 1 | 1 | 1: 1672 | 1: 1685 |
| Kahramanmaraş'ta<br>Meydana Gelen<br>Deprem Hk. Basın<br>Bülteni- 18 | Response\Military         | 1 | 1 | 1 | 1: 1690 | 1: 1697 |
| Kahramanmaraş'ta<br>Meydana Gelen<br>Deprem Hk. Basın<br>Bülteni- 18 | Response\Military         | 1 | 1 | 1 | 1: 1690 | 1: 1697 |
| Kahramanmaraş'ta<br>Meydana Gelen<br>Deprem Hk. Basın<br>Bülteni- 18 | Shelter&meal\Evacuation   | 1 | 1 | 1 | 1: 1864 | 1: 1870 |
| Kahramanmaraş'ta<br>Meydana Gelen<br>Deprem Hk. Basın<br>Bülteni- 18 | Shelter&meal\Evacuation   | 1 | 1 | 1 | 1: 1864 | 1: 1870 |

|                                                                      |                           |   |   |   |         |         |
|----------------------------------------------------------------------|---------------------------|---|---|---|---------|---------|
| Kahramanmaraş'ta<br>Meydana Gelen<br>Deprem Hk. Basın<br>Bülteni- 18 | Response\Coast guard&Navy | 1 | 1 | 1 | 1: 1881 | 1: 1896 |
| Kahramanmaraş'ta<br>Meydana Gelen<br>Deprem Hk. Basın<br>Bülteni- 18 | Response\Coast guard&Navy | 1 | 1 | 1 | 1: 1881 | 1: 1896 |
| Kahramanmaraş'ta<br>Meydana Gelen<br>Deprem Hk. Basın<br>Bülteni- 18 | Response\Coast guard&Navy | 1 | 1 | 1 | 1: 1925 | 1: 1938 |
| Kahramanmaraş'ta<br>Meydana Gelen<br>Deprem Hk. Basın<br>Bülteni- 18 | Response\Coast guard&Navy | 1 | 1 | 1 | 1: 1925 | 1: 1938 |
| Kahramanmaraş'ta<br>Meydana Gelen<br>Deprem Hk. Basın<br>Bülteni- 18 | Disaster                  | 1 | 1 | 1 | 1: 2015 | 1: 2018 |
| Kahramanmaraş'ta<br>Meydana Gelen<br>Deprem Hk. Basın<br>Bülteni- 18 | Disaster                  | 1 | 1 | 1 | 1: 2015 | 1: 2018 |
| Kahramanmaraş'ta<br>Meydana Gelen<br>Deprem Hk. Basın<br>Bülteni- 18 | Shelter&meal\Sheltering   | 1 | 1 | 1 | 1: 2020 | 1: 2026 |
| Kahramanmaraş'ta<br>Meydana Gelen<br>Deprem Hk. Basın<br>Bülteni- 18 | Shelter&meal\Sheltering   | 1 | 1 | 1 | 1: 2020 | 1: 2026 |
| Kahramanmaraş'ta<br>Meydana Gelen<br>Deprem Hk. Basın<br>Bülteni- 18 | Earthquake                | 1 | 1 | 1 | 1: 2035 | 1: 2040 |
| Kahramanmaraş'ta<br>Meydana Gelen<br>Deprem Hk. Basın<br>Bülteni- 18 | Earthquake                | 1 | 1 | 1 | 1: 2035 | 1: 2040 |
| Kahramanmaraş'ta<br>Meydana Gelen<br>Deprem Hk. Basın<br>Bülteni- 18 | AFAD                      | 1 | 1 | 1 | 1: 2081 | 1: 2084 |
| Kahramanmaraş'ta<br>Meydana Gelen<br>Deprem Hk. Basın<br>Bülteni- 18 | AFAD                      | 1 | 1 | 1 | 1: 2081 | 1: 2084 |
| Kahramanmaraş'ta<br>Meydana Gelen<br>Deprem Hk. Basın<br>Bülteni- 18 | Response\Welfare service  | 1 | 1 | 1 | 1: 2095 | 1: 2107 |
| Kahramanmaraş'ta<br>Meydana Gelen<br>Deprem Hk. Basın<br>Bülteni- 18 | Response\Welfare service  | 1 | 1 | 1 | 1: 2095 | 1: 2107 |
| Kahramanmaraş'ta<br>Meydana Gelen<br>Deprem Hk. Basın<br>Bülteni- 18 | Shelter&meal\Tent         | 1 | 1 | 1 | 1: 2152 | 1: 2156 |
| Kahramanmaraş'ta<br>Meydana Gelen<br>Deprem Hk. Basın<br>Bülteni- 18 | Shelter&meal\Tent         | 1 | 1 | 1 | 1: 2152 | 1: 2156 |
| Kahramanmaraş'ta<br>Meydana Gelen<br>Deprem Hk. Basın<br>Bülteni- 18 | Shelter&meal\Tent         | 1 | 1 | 1 | 1: 2217 | 1: 2221 |
| Kahramanmaraş'ta<br>Meydana Gelen<br>Deprem Hk. Basın<br>Bülteni- 18 | Shelter&meal\Tent         | 1 | 1 | 1 | 1: 2217 | 1: 2221 |
| Kahramanmaraş'ta<br>Meydana Gelen<br>Deprem Hk. Basın<br>Bülteni- 18 | Disaster                  | 1 | 1 | 1 | 1: 2253 | 1: 2256 |
| Kahramanmaraş'ta<br>Meydana Gelen<br>Deprem Hk. Basın<br>Bülteni- 18 | Disaster                  | 1 | 1 | 1 | 1: 2253 | 1: 2256 |

|                                                                      |                               |   |   |   |         |         |
|----------------------------------------------------------------------|-------------------------------|---|---|---|---------|---------|
| Kahramanmaraş'ta<br>Meydana Gelen<br>Deprem Hk. Basın<br>Bülteni- 18 | AFAD                          | 1 | 1 | 1 | 1: 2283 | 1: 2286 |
| Kahramanmaraş'ta<br>Meydana Gelen<br>Deprem Hk. Basın<br>Bülteni- 18 | AFAD                          | 1 | 1 | 1 | 1: 2283 | 1: 2286 |
| Kahramanmaraş'ta<br>Meydana Gelen<br>Deprem Hk. Basın<br>Bülteni- 18 | Response\Military             | 1 | 1 | 1 | 1: 2294 | 1: 2301 |
| Kahramanmaraş'ta<br>Meydana Gelen<br>Deprem Hk. Basın<br>Bülteni- 18 | Response\Military             | 1 | 1 | 1 | 1: 2294 | 1: 2301 |
| Kahramanmaraş'ta<br>Meydana Gelen<br>Deprem Hk. Basın<br>Bülteni- 18 | Coordination\NGO              | 1 | 1 | 1 | 1: 2306 | 1: 2317 |
| Kahramanmaraş'ta<br>Meydana Gelen<br>Deprem Hk. Basın<br>Bülteni- 18 | Coordination\NGO              | 1 | 1 | 1 | 1: 2306 | 1: 2317 |
| Kahramanmaraş'ta<br>Meydana Gelen<br>Deprem Hk. Basın<br>Bülteni- 18 | Shelter&meal\Mobile kitchen   | 1 | 1 | 1 | 1: 2397 | 1: 2408 |
| Kahramanmaraş'ta<br>Meydana Gelen<br>Deprem Hk. Basın<br>Bülteni- 18 | Shelter&meal\Mobile kitchen   | 1 | 1 | 1 | 1: 2397 | 1: 2408 |
| Kahramanmaraş'ta<br>Meydana Gelen<br>Deprem Hk. Basın<br>Bülteni- 18 | Shelter&meal\Mobile bakery    | 1 | 1 | 1 | 1: 2439 | 1: 2449 |
| Kahramanmaraş'ta<br>Meydana Gelen<br>Deprem Hk. Basın<br>Bülteni- 18 | Shelter&meal\Mobile bakery    | 1 | 1 | 1 | 1: 2439 | 1: 2449 |
| Kahramanmaraş'ta<br>Meydana Gelen<br>Deprem Hk. Basın<br>Bülteni- 18 | Shelter&meal\Container        | 1 | 1 | 1 | 1: 2471 | 1: 2479 |
| Kahramanmaraş'ta<br>Meydana Gelen<br>Deprem Hk. Basın<br>Bülteni- 18 | Shelter&meal\Container        | 1 | 1 | 1 | 1: 2471 | 1: 2479 |
| Kahramanmaraş'ta<br>Meydana Gelen<br>Deprem Hk. Basın<br>Bülteni- 18 | Disaster                      | 1 | 1 | 1 | 1: 2533 | 1: 2536 |
| Kahramanmaraş'ta<br>Meydana Gelen<br>Deprem Hk. Basın<br>Bülteni- 18 | Disaster                      | 1 | 1 | 1 | 1: 2533 | 1: 2536 |
| Kahramanmaraş'ta<br>Meydana Gelen<br>Deprem Hk. Basın<br>Bülteni- 18 | Shelter&meal\Hot meal         | 1 | 1 | 1 | 1: 2559 | 1: 2569 |
| Kahramanmaraş'ta<br>Meydana Gelen<br>Deprem Hk. Basın<br>Bülteni- 18 | Shelter&meal\Hot meal         | 1 | 1 | 1 | 1: 2559 | 1: 2569 |
| Kahramanmaraş'ta<br>Meydana Gelen<br>Deprem Hk. Basın<br>Bülteni- 18 | Disaster                      | 1 | 1 | 1 | 1: 2688 | 1: 2691 |
| Kahramanmaraş'ta<br>Meydana Gelen<br>Deprem Hk. Basın<br>Bülteni- 18 | Disaster                      | 1 | 1 | 1 | 1: 2688 | 1: 2691 |
| Kahramanmaraş'ta<br>Meydana Gelen<br>Deprem Hk. Basın<br>Bülteni- 18 | Response\Psychosocial support | 1 | 1 | 1 | 1: 2693 | 1: 2702 |
| Kahramanmaraş'ta<br>Meydana Gelen<br>Deprem Hk. Basın<br>Bülteni- 18 | Response\Psychosocial support | 1 | 1 | 1 | 1: 2693 | 1: 2702 |

|                                                                      |                               |   |   |   |         |         |
|----------------------------------------------------------------------|-------------------------------|---|---|---|---------|---------|
| Kahramanmaraş'ta<br>Meydana Gelen<br>Deprem Hk. Basın<br>Bülteni- 18 | Response\Welfare service      | 1 | 1 | 1 | 1: 2726 | 1: 2738 |
| Kahramanmaraş'ta<br>Meydana Gelen<br>Deprem Hk. Basın<br>Bülteni- 18 | Response\Welfare service      | 1 | 1 | 1 | 1: 2726 | 1: 2738 |
| Kahramanmaraş'ta<br>Meydana Gelen<br>Deprem Hk. Basın<br>Bülteni- 18 | Kahramanmaraş                 | 1 | 0 | 0 | 1: 2749 | 1: 2761 |
| Kahramanmaraş'ta<br>Meydana Gelen<br>Deprem Hk. Basın<br>Bülteni- 18 | Pazarcık                      | 0 | 1 | 0 | 1: 2749 | 1: 2761 |
| Kahramanmaraş'ta<br>Meydana Gelen<br>Deprem Hk. Basın<br>Bülteni- 18 | Kahramanmaraş                 | 1 | 0 | 0 | 2: 17   | 2: 29   |
| Kahramanmaraş'ta<br>Meydana Gelen<br>Deprem Hk. Basın<br>Bülteni- 18 | Pazarcık                      | 0 | 1 | 0 | 2: 17   | 2: 29   |
| Kahramanmaraş'ta<br>Meydana Gelen<br>Deprem Hk. Basın<br>Bülteni- 18 | Earthquake                    | 1 | 1 | 1 | 2: 48   | 2: 53   |
| Kahramanmaraş'ta<br>Meydana Gelen<br>Deprem Hk. Basın<br>Bülteni- 18 | Earthquake                    | 1 | 1 | 1 | 2: 48   | 2: 53   |
| Kahramanmaraş'ta<br>Meydana Gelen<br>Deprem Hk. Basın<br>Bülteni- 18 | AFAD                          | 1 | 1 | 1 | 2: 93   | 2: 96   |
| Kahramanmaraş'ta<br>Meydana Gelen<br>Deprem Hk. Basın<br>Bülteni- 18 | AFAD                          | 1 | 1 | 1 | 2: 93   | 2: 96   |
| Kahramanmaraş'ta<br>Meydana Gelen<br>Deprem Hk. Basın<br>Bülteni- 18 | Earthquake                    | 1 | 1 | 1 | 2: 135  | 2: 140  |
| Kahramanmaraş'ta<br>Meydana Gelen<br>Deprem Hk. Basın<br>Bülteni- 18 | Earthquake                    | 1 | 1 | 1 | 2: 135  | 2: 140  |
| Kahramanmaraş'ta<br>Meydana Gelen<br>Deprem Hk. Basın<br>Bülteni- 18 | Disaster                      | 1 | 1 | 1 | 2: 294  | 2: 297  |
| Kahramanmaraş'ta<br>Meydana Gelen<br>Deprem Hk. Basın<br>Bülteni- 18 | Disaster                      | 1 | 1 | 1 | 2: 294  | 2: 297  |
| Kahramanmaraş'ta<br>Meydana Gelen<br>Deprem Hk. Basın<br>Bülteni- 18 | Coordination\Public relations | 1 | 1 | 1 | 2: 453  | 2: 458  |
| Kahramanmaraş'ta<br>Meydana Gelen<br>Deprem Hk. Basın<br>Bülteni- 18 | Coordination\Public relations | 1 | 1 | 1 | 2: 453  | 2: 458  |
| Kahramanmaraş'ta<br>Meydana Gelen<br>Deprem Hk. Basın<br>Bülteni- 18 | AFAD                          | 1 | 1 | 1 | 2: 493  | 2: 496  |
| Kahramanmaraş'ta<br>Meydana Gelen<br>Deprem Hk. Basın<br>Bülteni- 18 | AFAD                          | 1 | 1 | 1 | 2: 493  | 2: 496  |
| Kahramanmaraş'ta<br>Meydana Gelen<br>Deprem Hk. Basın<br>Bülteni- 18 | AFAD                          | 1 | 1 | 1 | 2: 551  | 2: 554  |
| Kahramanmaraş'ta<br>Meydana Gelen<br>Deprem Hk. Basın<br>Bülteni- 18 | AFAD                          | 1 | 1 | 1 | 2: 551  | 2: 554  |

|                                                                      |                                 |   |   |   |         |         |
|----------------------------------------------------------------------|---------------------------------|---|---|---|---------|---------|
| Kahramanmaraş'ta<br>Meydana Gelen<br>Deprem Hk. Basın<br>Bülteni- 18 | AFAD                            | 1 | 1 | 1 | 2: 668  | 2: 671  |
| Kahramanmaraş'ta<br>Meydana Gelen<br>Deprem Hk. Basın<br>Bülteni- 18 | AFAD                            | 1 | 1 | 1 | 2: 668  | 2: 671  |
| Kahramanmaraş'ta<br>Meydana Gelen<br>Deprem Hk. Basın<br>Bülteni- 18 | Response\Search&Rescue          | 1 | 1 | 1 | 2: 762  | 2: 775  |
| Kahramanmaraş'ta<br>Meydana Gelen<br>Deprem Hk. Basın<br>Bülteni- 18 | Response\Search&Rescue          | 1 | 1 | 1 | 2: 762  | 2: 775  |
| Kahramanmaraş'ta<br>Meydana Gelen<br>Deprem Hk. Basın<br>Bülteni- 18 | Disaster                        | 1 | 1 | 1 | 2: 826  | 2: 829  |
| Kahramanmaraş'ta<br>Meydana Gelen<br>Deprem Hk. Basın<br>Bülteni- 18 | Disaster                        | 1 | 1 | 1 | 2: 826  | 2: 829  |
| Kahramanmaraş'ta<br>Meydana Gelen<br>Deprem Hk. Basın<br>Bülteni- 18 | AFAD                            | 1 | 1 | 1 | 2: 844  | 2: 847  |
| Kahramanmaraş'ta<br>Meydana Gelen<br>Deprem Hk. Basın<br>Bülteni- 18 | AFAD                            | 1 | 1 | 1 | 2: 844  | 2: 847  |
| Kahramanmaraş'ta<br>Meydana Gelen<br>Deprem Hk. Basın<br>Bülteni- 18 | Preparedness\Preparedness       | 1 | 1 | 1 | 2: 908  | 2: 918  |
| Kahramanmaraş'ta<br>Meydana Gelen<br>Deprem Hk. Basın<br>Bülteni- 18 | Preparedness\Preparedness       | 1 | 1 | 1 | 2: 908  | 2: 918  |
| Kahramanmaraş'ta<br>Meydana Gelen<br>Deprem Hk. Basın<br>Bülteni- 18 | Disaster                        | 1 | 1 | 1 | 2: 908  | 2: 911  |
| Kahramanmaraş'ta<br>Meydana Gelen<br>Deprem Hk. Basın<br>Bülteni- 18 | Disaster                        | 1 | 1 | 1 | 2: 908  | 2: 911  |
| Kahramanmaraş'ta<br>Meydana Gelen<br>Deprem Hk. Basın<br>Bülteni- 18 | Disaster                        | 1 | 1 | 1 | 2: 956  | 2: 959  |
| Kahramanmaraş'ta<br>Meydana Gelen<br>Deprem Hk. Basın<br>Bülteni- 18 | Disaster                        | 1 | 1 | 1 | 2: 956  | 2: 959  |
| Kahramanmaraş'ta<br>Meydana Gelen<br>Deprem Hk. Basın<br>Bülteni- 18 | Recovery\Fund drive             | 1 | 1 | 1 | 2: 1017 | 2: 1035 |
| Kahramanmaraş'ta<br>Meydana Gelen<br>Deprem Hk. Basın<br>Bülteni- 18 | Recovery\Fund drive             | 1 | 1 | 1 | 2: 1017 | 2: 1035 |
| Kahramanmaraş'ta<br>Meydana Gelen<br>Deprem Hk. Basın<br>Bülteni- 18 | Coordination\Social media       | 1 | 0 | 0 | 2: 1133 | 2: 1144 |
| Kahramanmaraş'ta<br>Meydana Gelen<br>Deprem Hk. Basın<br>Bülteni- 18 | Coordination\Social media usage | 0 | 1 | 0 | 2: 1133 | 2: 1144 |
| Kahramanmaraş'ta<br>Meydana Gelen<br>Deprem Hk. Basın<br>Bülteni- 18 | AFAD                            | 1 | 1 | 1 | 2: 1189 | 2: 1192 |
| Kahramanmaraş'ta<br>Meydana Gelen<br>Deprem Hk. Basın<br>Bülteni- 18 | AFAD                            | 1 | 1 | 1 | 2: 1189 | 2: 1192 |

|                                                                      |                                 |   |   |   |         |         |
|----------------------------------------------------------------------|---------------------------------|---|---|---|---------|---------|
| Kahramanmaraş'ta<br>Meydana Gelen<br>Deprem Hk. Basın<br>Bülteni- 18 | AFAD                            | 1 | 1 | 1 | 2: 1211 | 2: 1214 |
| Kahramanmaraş'ta<br>Meydana Gelen<br>Deprem Hk. Basın<br>Bülteni- 18 | AFAD                            | 1 | 1 | 1 | 2: 1211 | 2: 1214 |
| Kahramanmaraş'ta<br>Meydana Gelen<br>Deprem Hk. Basın<br>Bülteni- 18 | Coordination\Information        | 1 | 1 | 1 | 2: 1256 | 2: 1267 |
| Kahramanmaraş'ta<br>Meydana Gelen<br>Deprem Hk. Basın<br>Bülteni- 18 | Coordination\Information        | 1 | 1 | 1 | 2: 1256 | 2: 1267 |
| Kahramanmaraş'ta<br>Meydana Gelen<br>Deprem Hk. Basın<br>Bülteni- 18 | Recovery\Peacemaking            | 1 | 1 | 1 | 2: 1272 | 2: 1281 |
| Kahramanmaraş'ta<br>Meydana Gelen<br>Deprem Hk. Basın<br>Bülteni- 18 | Recovery\Peacemaking            | 1 | 1 | 1 | 2: 1272 | 2: 1281 |
| Kahramanmaraş'ta<br>Meydana Gelen<br>Deprem Hk. Basın<br>Bülteni- 18 | Coordination\Social media       | 1 | 0 | 0 | 2: 1328 | 2: 1339 |
| Kahramanmaraş'ta<br>Meydana Gelen<br>Deprem Hk. Basın<br>Bülteni- 18 | Coordination\Social media usage | 0 | 1 | 0 | 2: 1328 | 2: 1339 |
| Kahramanmaraş'ta<br>Meydana Gelen<br>Deprem Hk. Basın<br>Bülteni- 18 | Disaster                        | 1 | 1 | 1 | 2: 1430 | 2: 1433 |
| Kahramanmaraş'ta<br>Meydana Gelen<br>Deprem Hk. Basın<br>Bülteni- 18 | Disaster                        | 1 | 1 | 1 | 2: 1430 | 2: 1433 |
| Kahramanmaraş'ta<br>Meydana Gelen<br>Deprem Hk. Basın<br>Bülteni- 18 | Emergency                       | 1 | 1 | 1 | 2: 1438 | 2: 1447 |
| Kahramanmaraş'ta<br>Meydana Gelen<br>Deprem Hk. Basın<br>Bülteni- 18 | Emergency                       | 1 | 1 | 1 | 2: 1438 | 2: 1447 |
| Kahramanmaraş'ta<br>Meydana Gelen<br>Deprem Hk. Basın<br>Bülteni- 20 | Kahramanmaraş                   | 1 | 0 | 0 | 1: 17   | 1: 29   |
| Kahramanmaraş'ta<br>Meydana Gelen<br>Deprem Hk. Basın<br>Bülteni- 20 | Pazarcık                        | 0 | 1 | 0 | 1: 17   | 1: 29   |
| Kahramanmaraş'ta<br>Meydana Gelen<br>Deprem Hk. Basın<br>Bülteni- 20 | Earthquake                      | 1 | 1 | 1 | 1: 48   | 1: 53   |
| Kahramanmaraş'ta<br>Meydana Gelen<br>Deprem Hk. Basın<br>Bülteni- 20 | Earthquake                      | 1 | 1 | 1 | 1: 48   | 1: 53   |
| Kahramanmaraş'ta<br>Meydana Gelen<br>Deprem Hk. Basın<br>Bülteni- 20 | AFAD                            | 1 | 1 | 1 | 1: 93   | 1: 96   |
| Kahramanmaraş'ta<br>Meydana Gelen<br>Deprem Hk. Basın<br>Bülteni- 20 | AFAD                            | 1 | 1 | 1 | 1: 93   | 1: 96   |
| Kahramanmaraş'ta<br>Meydana Gelen<br>Deprem Hk. Basın<br>Bülteni- 20 | Earthquake                      | 1 | 1 | 1 | 1: 135  | 1: 140  |
| Kahramanmaraş'ta<br>Meydana Gelen<br>Deprem Hk. Basın<br>Bülteni- 20 | Earthquake                      | 1 | 1 | 1 | 1: 135  | 1: 140  |

|                                                                      |               |   |   |   |        |        |
|----------------------------------------------------------------------|---------------|---|---|---|--------|--------|
| Kahramanmaraş'ta<br>Meydana Gelen<br>Deprem Hk. Basın<br>Bülteni- 20 | Kahramanmaraş | 1 | 0 | 0 | 1: 170 | 1: 182 |
| Kahramanmaraş'ta<br>Meydana Gelen<br>Deprem Hk. Basın<br>Bülteni- 20 | Pazarcık      | 0 | 1 | 0 | 1: 170 | 1: 182 |
| Kahramanmaraş'ta<br>Meydana Gelen<br>Deprem Hk. Basın<br>Bülteni- 20 | Earthquake    | 1 | 1 | 1 | 1: 201 | 1: 206 |
| Kahramanmaraş'ta<br>Meydana Gelen<br>Deprem Hk. Basın<br>Bülteni- 20 | Earthquake    | 1 | 1 | 1 | 1: 201 | 1: 206 |
| Kahramanmaraş'ta<br>Meydana Gelen<br>Deprem Hk. Basın<br>Bülteni- 20 | Kahramanmaraş | 1 | 0 | 0 | 1: 284 | 1: 296 |
| Kahramanmaraş'ta<br>Meydana Gelen<br>Deprem Hk. Basın<br>Bülteni- 20 | Pazarcık      | 0 | 1 | 0 | 1: 284 | 1: 296 |
| Kahramanmaraş'ta<br>Meydana Gelen<br>Deprem Hk. Basın<br>Bülteni- 20 | Earthquake    | 1 | 1 | 1 | 1: 315 | 1: 320 |
| Kahramanmaraş'ta<br>Meydana Gelen<br>Deprem Hk. Basın<br>Bülteni- 20 | Earthquake    | 1 | 1 | 1 | 1: 315 | 1: 320 |
| Kahramanmaraş'ta<br>Meydana Gelen<br>Deprem Hk. Basın<br>Bülteni- 20 | Kahramanmaraş | 1 | 0 | 0 | 1: 381 | 1: 393 |
| Kahramanmaraş'ta<br>Meydana Gelen<br>Deprem Hk. Basın<br>Bülteni- 20 | Pazarcık      | 0 | 1 | 0 | 1: 381 | 1: 393 |
| Kahramanmaraş'ta<br>Meydana Gelen<br>Deprem Hk. Basın<br>Bülteni- 20 | Earthquake    | 1 | 1 | 1 | 1: 476 | 1: 481 |
| Kahramanmaraş'ta<br>Meydana Gelen<br>Deprem Hk. Basın<br>Bülteni- 20 | Earthquake    | 1 | 1 | 1 | 1: 476 | 1: 481 |
| Kahramanmaraş'ta<br>Meydana Gelen<br>Deprem Hk. Basın<br>Bülteni- 20 | Earthquake    | 1 | 1 | 1 | 1: 503 | 1: 508 |
| Kahramanmaraş'ta<br>Meydana Gelen<br>Deprem Hk. Basın<br>Bülteni- 20 | Earthquake    | 1 | 1 | 1 | 1: 503 | 1: 508 |
| Kahramanmaraş'ta<br>Meydana Gelen<br>Deprem Hk. Basın<br>Bülteni- 20 | Earthquake    | 1 | 1 | 1 | 1: 536 | 1: 541 |
| Kahramanmaraş'ta<br>Meydana Gelen<br>Deprem Hk. Basın<br>Bülteni- 20 | Earthquake    | 1 | 1 | 1 | 1: 536 | 1: 541 |
| Kahramanmaraş'ta<br>Meydana Gelen<br>Deprem Hk. Basın<br>Bülteni- 20 | Kahramanmaraş | 1 | 0 | 0 | 1: 599 | 1: 611 |
| Kahramanmaraş'ta<br>Meydana Gelen<br>Deprem Hk. Basın<br>Bülteni- 20 | Pazarcık      | 0 | 1 | 0 | 1: 599 | 1: 611 |
| Kahramanmaraş'ta<br>Meydana Gelen<br>Deprem Hk. Basın<br>Bülteni- 20 | AFAD          | 1 | 1 | 1 | 1: 809 | 1: 812 |
| Kahramanmaraş'ta<br>Meydana Gelen<br>Deprem Hk. Basın<br>Bülteni- 20 | AFAD          | 1 | 1 | 1 | 1: 809 | 1: 812 |



|                                                                      |                           |   |   |   |         |         |
|----------------------------------------------------------------------|---------------------------|---|---|---|---------|---------|
| Kahramanmaraş'ta<br>Meydana Gelen<br>Deprem Hk. Basın<br>Bülteni- 20 | Response\Coast guard&Navy | 1 | 1 | 1 | 1: 838  | 1: 851  |
| Kahramanmaraş'ta<br>Meydana Gelen<br>Deprem Hk. Basın<br>Bülteni- 20 | Response\Coast guard&Navy | 1 | 1 | 1 | 1: 838  | 1: 851  |
| Kahramanmaraş'ta<br>Meydana Gelen<br>Deprem Hk. Basın<br>Bülteni- 20 | Response\Number of staff  | 1 | 0 | 0 | 1: 915  | 1: 937  |
| Kahramanmaraş'ta<br>Meydana Gelen<br>Deprem Hk. Basın<br>Bülteni- 20 | Response\Search&Rescue    | 1 | 1 | 1 | 1: 915  | 1: 928  |
| Kahramanmaraş'ta<br>Meydana Gelen<br>Deprem Hk. Basın<br>Bülteni- 20 | Response\Search&Rescue    | 1 | 1 | 1 | 1: 915  | 1: 928  |
| Kahramanmaraş'ta<br>Meydana Gelen<br>Deprem Hk. Basın<br>Bülteni- 20 | Response\Number           | 0 | 1 | 0 | 1: 915  | 1: 937  |
| Kahramanmaraş'ta<br>Meydana Gelen<br>Deprem Hk. Basın<br>Bülteni- 20 | Response\Number of staff  | 1 | 0 | 0 | 1: 966  | 1: 988  |
| Kahramanmaraş'ta<br>Meydana Gelen<br>Deprem Hk. Basın<br>Bülteni- 20 | Response\Search&Rescue    | 1 | 1 | 1 | 1: 966  | 1: 979  |
| Kahramanmaraş'ta<br>Meydana Gelen<br>Deprem Hk. Basın<br>Bülteni- 20 | Response\Search&Rescue    | 1 | 1 | 1 | 1: 966  | 1: 979  |
| Kahramanmaraş'ta<br>Meydana Gelen<br>Deprem Hk. Basın<br>Bülteni- 20 | Response\Number           | 0 | 1 | 0 | 1: 966  | 1: 988  |
| Kahramanmaraş'ta<br>Meydana Gelen<br>Deprem Hk. Basın<br>Bülteni- 20 | Response\Number of staff  | 1 | 0 | 0 | 1: 1089 | 1: 1111 |
| Kahramanmaraş'ta<br>Meydana Gelen<br>Deprem Hk. Basın<br>Bülteni- 20 | Response\Search&Rescue    | 1 | 1 | 1 | 1: 1089 | 1: 1102 |
| Kahramanmaraş'ta<br>Meydana Gelen<br>Deprem Hk. Basın<br>Bülteni- 20 | Response\Search&Rescue    | 1 | 1 | 1 | 1: 1089 | 1: 1102 |
| Kahramanmaraş'ta<br>Meydana Gelen<br>Deprem Hk. Basın<br>Bülteni- 20 | Response\Number           | 0 | 1 | 0 | 1: 1089 | 1: 1111 |
| Kahramanmaraş'ta<br>Meydana Gelen<br>Deprem Hk. Basın<br>Bülteni- 20 | AFAD                      | 1 | 1 | 1 | 1: 1140 | 1: 1143 |
| Kahramanmaraş'ta<br>Meydana Gelen<br>Deprem Hk. Basın<br>Bülteni- 20 | AFAD                      | 1 | 1 | 1 | 1: 1140 | 1: 1143 |
| Kahramanmaraş'ta<br>Meydana Gelen<br>Deprem Hk. Basın<br>Bülteni- 20 | Response\Military         | 1 | 1 | 1 | 1: 1155 | 1: 1162 |
| Kahramanmaraş'ta<br>Meydana Gelen<br>Deprem Hk. Basın<br>Bülteni- 20 | Response\Military         | 1 | 1 | 1 | 1: 1155 | 1: 1162 |
| Kahramanmaraş'ta<br>Meydana Gelen<br>Deprem Hk. Basın<br>Bülteni- 20 | Response\Number of staff  | 1 | 0 | 0 | 1: 1275 | 1: 1289 |
| Kahramanmaraş'ta<br>Meydana Gelen<br>Deprem Hk. Basın<br>Bülteni- 20 | Response\Number           | 0 | 1 | 0 | 1: 1275 | 1: 1289 |

|                                                                      |                           |   |   |   |         |         |
|----------------------------------------------------------------------|---------------------------|---|---|---|---------|---------|
| Kahramanmaraş'ta<br>Meydana Gelen<br>Deprem Hk. Basın<br>Bülteni- 20 | Response\Number of staff  | 1 | 0 | 0 | 1: 1331 | 1: 1345 |
| Kahramanmaraş'ta<br>Meydana Gelen<br>Deprem Hk. Basın<br>Bülteni- 20 | Response\Number           | 0 | 1 | 0 | 1: 1331 | 1: 1345 |
| Kahramanmaraş'ta<br>Meydana Gelen<br>Deprem Hk. Basın<br>Bülteni- 20 | Disaster                  | 1 | 1 | 1 | 1: 1361 | 1: 1364 |
| Kahramanmaraş'ta<br>Meydana Gelen<br>Deprem Hk. Basın<br>Bülteni- 20 | Disaster                  | 1 | 1 | 1 | 1: 1361 | 1: 1364 |
| Kahramanmaraş'ta<br>Meydana Gelen<br>Deprem Hk. Basın<br>Bülteni- 20 | Disaster                  | 1 | 1 | 1 | 1: 1526 | 1: 1529 |
| Kahramanmaraş'ta<br>Meydana Gelen<br>Deprem Hk. Basın<br>Bülteni- 20 | Disaster                  | 1 | 1 | 1 | 1: 1526 | 1: 1529 |
| Kahramanmaraş'ta<br>Meydana Gelen<br>Deprem Hk. Basın<br>Bülteni- 20 | AFAD                      | 1 | 1 | 1 | 1: 1580 | 1: 1583 |
| Kahramanmaraş'ta<br>Meydana Gelen<br>Deprem Hk. Basın<br>Bülteni- 20 | AFAD                      | 1 | 1 | 1 | 1: 1580 | 1: 1583 |
| Kahramanmaraş'ta<br>Meydana Gelen<br>Deprem Hk. Basın<br>Bülteni- 20 | Response\Coast guard&Navy | 1 | 1 | 1 | 1: 1673 | 1: 1686 |
| Kahramanmaraş'ta<br>Meydana Gelen<br>Deprem Hk. Basın<br>Bülteni- 20 | Response\Coast guard&Navy | 1 | 1 | 1 | 1: 1673 | 1: 1686 |
| Kahramanmaraş'ta<br>Meydana Gelen<br>Deprem Hk. Basın<br>Bülteni- 20 | Response\Military         | 1 | 1 | 1 | 1: 1691 | 1: 1698 |
| Kahramanmaraş'ta<br>Meydana Gelen<br>Deprem Hk. Basın<br>Bülteni- 20 | Response\Military         | 1 | 1 | 1 | 1: 1691 | 1: 1698 |
| Kahramanmaraş'ta<br>Meydana Gelen<br>Deprem Hk. Basın<br>Bülteni- 20 | Shelter&meal\Evacuation   | 1 | 1 | 1 | 1: 1865 | 1: 1871 |
| Kahramanmaraş'ta<br>Meydana Gelen<br>Deprem Hk. Basın<br>Bülteni- 20 | Shelter&meal\Evacuation   | 1 | 1 | 1 | 1: 1865 | 1: 1871 |
| Kahramanmaraş'ta<br>Meydana Gelen<br>Deprem Hk. Basın<br>Bülteni- 20 | Response\Coast guard&Navy | 1 | 1 | 1 | 1: 1882 | 1: 1897 |
| Kahramanmaraş'ta<br>Meydana Gelen<br>Deprem Hk. Basın<br>Bülteni- 20 | Response\Coast guard&Navy | 1 | 1 | 1 | 1: 1882 | 1: 1897 |
| Kahramanmaraş'ta<br>Meydana Gelen<br>Deprem Hk. Basın<br>Bülteni- 20 | Response\Coast guard&Navy | 1 | 1 | 1 | 1: 1926 | 1: 1939 |
| Kahramanmaraş'ta<br>Meydana Gelen<br>Deprem Hk. Basın<br>Bülteni- 20 | Response\Coast guard&Navy | 1 | 1 | 1 | 1: 1926 | 1: 1939 |
| Kahramanmaraş'ta<br>Meydana Gelen<br>Deprem Hk. Basın<br>Bülteni- 20 | Disaster                  | 1 | 1 | 1 | 1: 2016 | 1: 2019 |
| Kahramanmaraş'ta<br>Meydana Gelen<br>Deprem Hk. Basın<br>Bülteni- 20 | Disaster                  | 1 | 1 | 1 | 1: 2016 | 1: 2019 |

|                                                                      |                          |   |   |   |         |         |
|----------------------------------------------------------------------|--------------------------|---|---|---|---------|---------|
| Kahramanmaraş'ta<br>Meydana Gelen<br>Deprem Hk. Basın<br>Bülteni- 20 | Shelter&meal\Sheltering  | 1 | 1 | 1 | 1: 2021 | 1: 2027 |
| Kahramanmaraş'ta<br>Meydana Gelen<br>Deprem Hk. Basın<br>Bülteni- 20 | Shelter&meal\Sheltering  | 1 | 1 | 1 | 1: 2021 | 1: 2027 |
| Kahramanmaraş'ta<br>Meydana Gelen<br>Deprem Hk. Basın<br>Bülteni- 20 | Earthquake               | 1 | 1 | 1 | 1: 2036 | 1: 2041 |
| Kahramanmaraş'ta<br>Meydana Gelen<br>Deprem Hk. Basın<br>Bülteni- 20 | Earthquake               | 1 | 1 | 1 | 1: 2036 | 1: 2041 |
| Kahramanmaraş'ta<br>Meydana Gelen<br>Deprem Hk. Basın<br>Bülteni- 20 | AFAD                     | 1 | 1 | 1 | 1: 2082 | 1: 2085 |
| Kahramanmaraş'ta<br>Meydana Gelen<br>Deprem Hk. Basın<br>Bülteni- 20 | AFAD                     | 1 | 1 | 1 | 1: 2082 | 1: 2085 |
| Kahramanmaraş'ta<br>Meydana Gelen<br>Deprem Hk. Basın<br>Bülteni- 20 | Response\Welfare service | 1 | 1 | 1 | 1: 2096 | 1: 2108 |
| Kahramanmaraş'ta<br>Meydana Gelen<br>Deprem Hk. Basın<br>Bülteni- 20 | Response\Welfare service | 1 | 1 | 1 | 1: 2096 | 1: 2108 |
| Kahramanmaraş'ta<br>Meydana Gelen<br>Deprem Hk. Basın<br>Bülteni- 20 | Shelter&meal\Tent        | 1 | 1 | 1 | 1: 2154 | 1: 2158 |
| Kahramanmaraş'ta<br>Meydana Gelen<br>Deprem Hk. Basın<br>Bülteni- 20 | Shelter&meal\Tent        | 1 | 1 | 1 | 1: 2154 | 1: 2158 |
| Kahramanmaraş'ta<br>Meydana Gelen<br>Deprem Hk. Basın<br>Bülteni- 20 | Shelter&meal\Tent        | 1 | 1 | 1 | 1: 2219 | 1: 2223 |
| Kahramanmaraş'ta<br>Meydana Gelen<br>Deprem Hk. Basın<br>Bülteni- 20 | Shelter&meal\Tent        | 1 | 1 | 1 | 1: 2219 | 1: 2223 |
| Kahramanmaraş'ta<br>Meydana Gelen<br>Deprem Hk. Basın<br>Bülteni- 20 | Disaster                 | 1 | 1 | 1 | 1: 2255 | 1: 2258 |
| Kahramanmaraş'ta<br>Meydana Gelen<br>Deprem Hk. Basın<br>Bülteni- 20 | Disaster                 | 1 | 1 | 1 | 1: 2255 | 1: 2258 |
| Kahramanmaraş'ta<br>Meydana Gelen<br>Deprem Hk. Basın<br>Bülteni- 20 | AFAD                     | 1 | 1 | 1 | 1: 2285 | 1: 2288 |
| Kahramanmaraş'ta<br>Meydana Gelen<br>Deprem Hk. Basın<br>Bülteni- 20 | AFAD                     | 1 | 1 | 1 | 1: 2285 | 1: 2288 |
| Kahramanmaraş'ta<br>Meydana Gelen<br>Deprem Hk. Basın<br>Bülteni- 20 | Response\Military        | 1 | 1 | 1 | 1: 2296 | 1: 2303 |
| Kahramanmaraş'ta<br>Meydana Gelen<br>Deprem Hk. Basın<br>Bülteni- 20 | Response\Military        | 1 | 1 | 1 | 1: 2296 | 1: 2303 |
| Kahramanmaraş'ta<br>Meydana Gelen<br>Deprem Hk. Basın<br>Bülteni- 20 | Coordination\NGO         | 1 | 1 | 1 | 1: 2308 | 1: 2319 |
| Kahramanmaraş'ta<br>Meydana Gelen<br>Deprem Hk. Basın<br>Bülteni- 20 | Coordination\NGO         | 1 | 1 | 1 | 1: 2308 | 1: 2319 |

|                                                                      |                               |   |   |   |         |         |
|----------------------------------------------------------------------|-------------------------------|---|---|---|---------|---------|
| Kahramanmaraş'ta<br>Meydana Gelen<br>Deprem Hk. Basın<br>Bülteni- 20 | Shelter&meal\Mobile kitchen   | 1 | 1 | 1 | 1: 2399 | 1: 2410 |
| Kahramanmaraş'ta<br>Meydana Gelen<br>Deprem Hk. Basın<br>Bülteni- 20 | Shelter&meal\Mobile kitchen   | 1 | 1 | 1 | 1: 2399 | 1: 2410 |
| Kahramanmaraş'ta<br>Meydana Gelen<br>Deprem Hk. Basın<br>Bülteni- 20 | Shelter&meal\Mobile bakery    | 1 | 1 | 1 | 1: 2447 | 1: 2457 |
| Kahramanmaraş'ta<br>Meydana Gelen<br>Deprem Hk. Basın<br>Bülteni- 20 | Shelter&meal\Mobile bakery    | 1 | 1 | 1 | 1: 2447 | 1: 2457 |
| Kahramanmaraş'ta<br>Meydana Gelen<br>Deprem Hk. Basın<br>Bülteni- 20 | Shelter&meal\Container        | 1 | 1 | 1 | 1: 2479 | 1: 2487 |
| Kahramanmaraş'ta<br>Meydana Gelen<br>Deprem Hk. Basın<br>Bülteni- 20 | Shelter&meal\Container        | 1 | 1 | 1 | 1: 2479 | 1: 2487 |
| Kahramanmaraş'ta<br>Meydana Gelen<br>Deprem Hk. Basın<br>Bülteni- 20 | Disaster                      | 1 | 1 | 1 | 1: 2541 | 1: 2544 |
| Kahramanmaraş'ta<br>Meydana Gelen<br>Deprem Hk. Basın<br>Bülteni- 20 | Disaster                      | 1 | 1 | 1 | 1: 2541 | 1: 2544 |
| Kahramanmaraş'ta<br>Meydana Gelen<br>Deprem Hk. Basın<br>Bülteni- 20 | Shelter&meal\Hot meal         | 1 | 1 | 1 | 1: 2567 | 1: 2577 |
| Kahramanmaraş'ta<br>Meydana Gelen<br>Deprem Hk. Basın<br>Bülteni- 20 | Shelter&meal\Hot meal         | 1 | 1 | 1 | 1: 2567 | 1: 2577 |
| Kahramanmaraş'ta<br>Meydana Gelen<br>Deprem Hk. Basın<br>Bülteni- 20 | Disaster                      | 1 | 1 | 1 | 1: 2717 | 1: 2720 |
| Kahramanmaraş'ta<br>Meydana Gelen<br>Deprem Hk. Basın<br>Bülteni- 20 | Disaster                      | 1 | 1 | 1 | 1: 2717 | 1: 2720 |
| Kahramanmaraş'ta<br>Meydana Gelen<br>Deprem Hk. Basın<br>Bülteni- 20 | Response\Psychosocial support | 1 | 1 | 1 | 1: 2722 | 1: 2731 |
| Kahramanmaraş'ta<br>Meydana Gelen<br>Deprem Hk. Basın<br>Bülteni- 20 | Response\Psychosocial support | 1 | 1 | 1 | 1: 2722 | 1: 2731 |
| Kahramanmaraş'ta<br>Meydana Gelen<br>Deprem Hk. Basın<br>Bülteni- 20 | Response\Welfare service      | 1 | 1 | 1 | 1: 2755 | 1: 2767 |
| Kahramanmaraş'ta<br>Meydana Gelen<br>Deprem Hk. Basın<br>Bülteni- 20 | Response\Welfare service      | 1 | 1 | 1 | 1: 2755 | 1: 2767 |
| Kahramanmaraş'ta<br>Meydana Gelen<br>Deprem Hk. Basın<br>Bülteni- 20 | Kahramanmaraş                 | 1 | 0 | 0 | 1: 2778 | 1: 2790 |
| Kahramanmaraş'ta<br>Meydana Gelen<br>Deprem Hk. Basın<br>Bülteni- 20 | Pazarcık                      | 0 | 1 | 0 | 1: 2778 | 1: 2790 |
| Kahramanmaraş'ta<br>Meydana Gelen<br>Deprem Hk. Basın<br>Bülteni- 20 | Kahramanmaraş                 | 1 | 0 | 0 | 2: 17   | 2: 29   |
| Kahramanmaraş'ta<br>Meydana Gelen<br>Deprem Hk. Basın<br>Bülteni- 20 | Pazarcık                      | 0 | 1 | 0 | 2: 17   | 2: 29   |

|                                                                      |                               |   |   |   |        |        |
|----------------------------------------------------------------------|-------------------------------|---|---|---|--------|--------|
| Kahramanmaraş'ta<br>Meydana Gelen<br>Deprem Hk. Basın<br>Bülteni- 20 | Earthquake                    | 1 | 1 | 1 | 2: 48  | 2: 53  |
| Kahramanmaraş'ta<br>Meydana Gelen<br>Deprem Hk. Basın<br>Bülteni- 20 | Earthquake                    | 1 | 1 | 1 | 2: 48  | 2: 53  |
| Kahramanmaraş'ta<br>Meydana Gelen<br>Deprem Hk. Basın<br>Bülteni- 20 | AFAD                          | 1 | 1 | 1 | 2: 93  | 2: 96  |
| Kahramanmaraş'ta<br>Meydana Gelen<br>Deprem Hk. Basın<br>Bülteni- 20 | AFAD                          | 1 | 1 | 1 | 2: 93  | 2: 96  |
| Kahramanmaraş'ta<br>Meydana Gelen<br>Deprem Hk. Basın<br>Bülteni- 20 | Earthquake                    | 1 | 1 | 1 | 2: 135 | 2: 140 |
| Kahramanmaraş'ta<br>Meydana Gelen<br>Deprem Hk. Basın<br>Bülteni- 20 | Earthquake                    | 1 | 1 | 1 | 2: 135 | 2: 140 |
| Kahramanmaraş'ta<br>Meydana Gelen<br>Deprem Hk. Basın<br>Bülteni- 20 | Disaster                      | 1 | 1 | 1 | 2: 294 | 2: 297 |
| Kahramanmaraş'ta<br>Meydana Gelen<br>Deprem Hk. Basın<br>Bülteni- 20 | Disaster                      | 1 | 1 | 1 | 2: 294 | 2: 297 |
| Kahramanmaraş'ta<br>Meydana Gelen<br>Deprem Hk. Basın<br>Bülteni- 20 | Coordination\Public relations | 1 | 1 | 1 | 2: 453 | 2: 458 |
| Kahramanmaraş'ta<br>Meydana Gelen<br>Deprem Hk. Basın<br>Bülteni- 20 | Coordination\Public relations | 1 | 1 | 1 | 2: 453 | 2: 458 |
| Kahramanmaraş'ta<br>Meydana Gelen<br>Deprem Hk. Basın<br>Bülteni- 20 | AFAD                          | 1 | 1 | 1 | 2: 493 | 2: 496 |
| Kahramanmaraş'ta<br>Meydana Gelen<br>Deprem Hk. Basın<br>Bülteni- 20 | AFAD                          | 1 | 1 | 1 | 2: 493 | 2: 496 |
| Kahramanmaraş'ta<br>Meydana Gelen<br>Deprem Hk. Basın<br>Bülteni- 20 | AFAD                          | 1 | 1 | 1 | 2: 551 | 2: 554 |
| Kahramanmaraş'ta<br>Meydana Gelen<br>Deprem Hk. Basın<br>Bülteni- 20 | AFAD                          | 1 | 1 | 1 | 2: 551 | 2: 554 |
| Kahramanmaraş'ta<br>Meydana Gelen<br>Deprem Hk. Basın<br>Bülteni- 20 | AFAD                          | 1 | 1 | 1 | 2: 668 | 2: 671 |
| Kahramanmaraş'ta<br>Meydana Gelen<br>Deprem Hk. Basın<br>Bülteni- 20 | AFAD                          | 1 | 1 | 1 | 2: 668 | 2: 671 |
| Kahramanmaraş'ta<br>Meydana Gelen<br>Deprem Hk. Basın<br>Bülteni- 20 | Response\Search&Rescue        | 1 | 1 | 1 | 2: 762 | 2: 775 |
| Kahramanmaraş'ta<br>Meydana Gelen<br>Deprem Hk. Basın<br>Bülteni- 20 | Response\Search&Rescue        | 1 | 1 | 1 | 2: 762 | 2: 775 |
| Kahramanmaraş'ta<br>Meydana Gelen<br>Deprem Hk. Basın<br>Bülteni- 20 | Disaster                      | 1 | 1 | 1 | 2: 826 | 2: 829 |
| Kahramanmaraş'ta<br>Meydana Gelen<br>Deprem Hk. Basın<br>Bülteni- 20 | Disaster                      | 1 | 1 | 1 | 2: 826 | 2: 829 |

|                                                                      |                                 |   |   |   |         |         |
|----------------------------------------------------------------------|---------------------------------|---|---|---|---------|---------|
| Kahramanmaraş'ta<br>Meydana Gelen<br>Deprem Hk. Basın<br>Bülteni- 20 | AFAD                            | 1 | 1 | 1 | 2: 844  | 2: 847  |
| Kahramanmaraş'ta<br>Meydana Gelen<br>Deprem Hk. Basın<br>Bülteni- 20 | AFAD                            | 1 | 1 | 1 | 2: 844  | 2: 847  |
| Kahramanmaraş'ta<br>Meydana Gelen<br>Deprem Hk. Basın<br>Bülteni- 20 | Preparedness\Preparedness       | 1 | 1 | 1 | 2: 908  | 2: 918  |
| Kahramanmaraş'ta<br>Meydana Gelen<br>Deprem Hk. Basın<br>Bülteni- 20 | Preparedness\Preparedness       | 1 | 1 | 1 | 2: 908  | 2: 918  |
| Kahramanmaraş'ta<br>Meydana Gelen<br>Deprem Hk. Basın<br>Bülteni- 20 | Disaster                        | 1 | 1 | 1 | 2: 908  | 2: 911  |
| Kahramanmaraş'ta<br>Meydana Gelen<br>Deprem Hk. Basın<br>Bülteni- 20 | Disaster                        | 1 | 1 | 1 | 2: 908  | 2: 911  |
| Kahramanmaraş'ta<br>Meydana Gelen<br>Deprem Hk. Basın<br>Bülteni- 20 | Disaster                        | 1 | 1 | 1 | 2: 956  | 2: 959  |
| Kahramanmaraş'ta<br>Meydana Gelen<br>Deprem Hk. Basın<br>Bülteni- 20 | Disaster                        | 1 | 1 | 1 | 2: 956  | 2: 959  |
| Kahramanmaraş'ta<br>Meydana Gelen<br>Deprem Hk. Basın<br>Bülteni- 20 | Recovery\Fund drive             | 1 | 1 | 1 | 2: 1017 | 2: 1035 |
| Kahramanmaraş'ta<br>Meydana Gelen<br>Deprem Hk. Basın<br>Bülteni- 20 | Recovery\Fund drive             | 1 | 1 | 1 | 2: 1017 | 2: 1035 |
| Kahramanmaraş'ta<br>Meydana Gelen<br>Deprem Hk. Basın<br>Bülteni- 20 | Coordination\Social media       | 1 | 0 | 0 | 2: 1133 | 2: 1144 |
| Kahramanmaraş'ta<br>Meydana Gelen<br>Deprem Hk. Basın<br>Bülteni- 20 | Coordination\Social media usage | 0 | 1 | 0 | 2: 1133 | 2: 1144 |
| Kahramanmaraş'ta<br>Meydana Gelen<br>Deprem Hk. Basın<br>Bülteni- 20 | AFAD                            | 1 | 1 | 1 | 2: 1189 | 2: 1192 |
| Kahramanmaraş'ta<br>Meydana Gelen<br>Deprem Hk. Basın<br>Bülteni- 20 | AFAD                            | 1 | 1 | 1 | 2: 1189 | 2: 1192 |
| Kahramanmaraş'ta<br>Meydana Gelen<br>Deprem Hk. Basın<br>Bülteni- 20 | AFAD                            | 1 | 1 | 1 | 2: 1211 | 2: 1214 |
| Kahramanmaraş'ta<br>Meydana Gelen<br>Deprem Hk. Basın<br>Bülteni- 20 | AFAD                            | 1 | 1 | 1 | 2: 1211 | 2: 1214 |
| Kahramanmaraş'ta<br>Meydana Gelen<br>Deprem Hk. Basın<br>Bülteni- 20 | Coordination\Information        | 1 | 1 | 1 | 2: 1256 | 2: 1267 |
| Kahramanmaraş'ta<br>Meydana Gelen<br>Deprem Hk. Basın<br>Bülteni- 20 | Coordination\Information        | 1 | 1 | 1 | 2: 1256 | 2: 1267 |
| Kahramanmaraş'ta<br>Meydana Gelen<br>Deprem Hk. Basın<br>Bülteni- 20 | Recovery\Peacemaking            | 1 | 1 | 1 | 2: 1272 | 2: 1281 |
| Kahramanmaraş'ta<br>Meydana Gelen<br>Deprem Hk. Basın<br>Bülteni- 20 | Recovery\Peacemaking            | 1 | 1 | 1 | 2: 1272 | 2: 1281 |

|                                                                      |                                 |   |   |   |         |         |
|----------------------------------------------------------------------|---------------------------------|---|---|---|---------|---------|
| Kahramanmaraş'ta<br>Meydana Gelen<br>Deprem Hk. Basın<br>Bülteni- 20 | Coordination\Social media       | 1 | 0 | 0 | 2: 1328 | 2: 1339 |
| Kahramanmaraş'ta<br>Meydana Gelen<br>Deprem Hk. Basın<br>Bülteni- 20 | Coordination\Social media usage | 0 | 1 | 0 | 2: 1328 | 2: 1339 |
| Kahramanmaraş'ta<br>Meydana Gelen<br>Deprem Hk. Basın<br>Bülteni- 20 | Disaster                        | 1 | 1 | 1 | 2: 1430 | 2: 1433 |
| Kahramanmaraş'ta<br>Meydana Gelen<br>Deprem Hk. Basın<br>Bülteni- 20 | Disaster                        | 1 | 1 | 1 | 2: 1430 | 2: 1433 |
| Kahramanmaraş'ta<br>Meydana Gelen<br>Deprem Hk. Basın<br>Bülteni- 20 | Emergency                       | 1 | 1 | 1 | 2: 1438 | 2: 1447 |
| Kahramanmaraş'ta<br>Meydana Gelen<br>Deprem Hk. Basın<br>Bülteni- 20 | Emergency                       | 1 | 1 | 1 | 2: 1438 | 2: 1447 |
| Kahramanmaraş'ta<br>Meydana Gelen<br>Deprem Hk. Basın<br>Bülteni-19  | Kahramanmaraş                   | 1 | 0 | 0 | 1: 17   | 1: 29   |
| Kahramanmaraş'ta<br>Meydana Gelen<br>Deprem Hk. Basın<br>Bülteni-19  | Pazarcık                        | 0 | 1 | 0 | 1: 17   | 1: 29   |
| Kahramanmaraş'ta<br>Meydana Gelen<br>Deprem Hk. Basın<br>Bülteni-19  | Earthquake                      | 1 | 1 | 1 | 1: 48   | 1: 53   |
| Kahramanmaraş'ta<br>Meydana Gelen<br>Deprem Hk. Basın<br>Bülteni-19  | Earthquake                      | 1 | 1 | 1 | 1: 48   | 1: 53   |
| Kahramanmaraş'ta<br>Meydana Gelen<br>Deprem Hk. Basın<br>Bülteni-19  | AFAD                            | 1 | 1 | 1 | 1: 92   | 1: 95   |
| Kahramanmaraş'ta<br>Meydana Gelen<br>Deprem Hk. Basın<br>Bülteni-19  | AFAD                            | 1 | 1 | 1 | 1: 92   | 1: 95   |
| Kahramanmaraş'ta<br>Meydana Gelen<br>Deprem Hk. Basın<br>Bülteni-19  | Earthquake                      | 1 | 1 | 1 | 1: 134  | 1: 139  |
| Kahramanmaraş'ta<br>Meydana Gelen<br>Deprem Hk. Basın<br>Bülteni-19  | Earthquake                      | 1 | 1 | 1 | 1: 134  | 1: 139  |
| Kahramanmaraş'ta<br>Meydana Gelen<br>Deprem Hk. Basın<br>Bülteni-19  | Kahramanmaraş                   | 1 | 0 | 0 | 1: 168  | 1: 180  |
| Kahramanmaraş'ta<br>Meydana Gelen<br>Deprem Hk. Basın<br>Bülteni-19  | Pazarcık                        | 0 | 1 | 0 | 1: 168  | 1: 180  |
| Kahramanmaraş'ta<br>Meydana Gelen<br>Deprem Hk. Basın<br>Bülteni-19  | Earthquake                      | 1 | 1 | 1 | 1: 199  | 1: 204  |
| Kahramanmaraş'ta<br>Meydana Gelen<br>Deprem Hk. Basın<br>Bülteni-19  | Earthquake                      | 1 | 1 | 1 | 1: 199  | 1: 204  |
| Kahramanmaraş'ta<br>Meydana Gelen<br>Deprem Hk. Basın<br>Bülteni-19  | Kahramanmaraş                   | 1 | 0 | 0 | 1: 281  | 1: 293  |
| Kahramanmaraş'ta<br>Meydana Gelen<br>Deprem Hk. Basın<br>Bülteni-19  | Pazarcık                        | 0 | 1 | 0 | 1: 281  | 1: 293  |

|                                                                     |                           |   |   |   |        |        |
|---------------------------------------------------------------------|---------------------------|---|---|---|--------|--------|
| Kahramanmaraş'ta<br>Meydana Gelen<br>Deprem Hk. Basın<br>Bülteni-19 | Earthquake                | 1 | 1 | 1 | 1: 312 | 1: 317 |
| Kahramanmaraş'ta<br>Meydana Gelen<br>Deprem Hk. Basın<br>Bülteni-19 | Earthquake                | 1 | 1 | 1 | 1: 312 | 1: 317 |
| Kahramanmaraş'ta<br>Meydana Gelen<br>Deprem Hk. Basın<br>Bülteni-19 | Kahramanmaraş             | 1 | 0 | 0 | 1: 378 | 1: 390 |
| Kahramanmaraş'ta<br>Meydana Gelen<br>Deprem Hk. Basın<br>Bülteni-19 | Pazarcık                  | 0 | 1 | 0 | 1: 378 | 1: 390 |
| Kahramanmaraş'ta<br>Meydana Gelen<br>Deprem Hk. Basın<br>Bülteni-19 | Earthquake                | 1 | 1 | 1 | 1: 473 | 1: 478 |
| Kahramanmaraş'ta<br>Meydana Gelen<br>Deprem Hk. Basın<br>Bülteni-19 | Earthquake                | 1 | 1 | 1 | 1: 473 | 1: 478 |
| Kahramanmaraş'ta<br>Meydana Gelen<br>Deprem Hk. Basın<br>Bülteni-19 | Earthquake                | 1 | 1 | 1 | 1: 500 | 1: 505 |
| Kahramanmaraş'ta<br>Meydana Gelen<br>Deprem Hk. Basın<br>Bülteni-19 | Earthquake                | 1 | 1 | 1 | 1: 500 | 1: 505 |
| Kahramanmaraş'ta<br>Meydana Gelen<br>Deprem Hk. Basın<br>Bülteni-19 | Earthquake                | 1 | 1 | 1 | 1: 533 | 1: 538 |
| Kahramanmaraş'ta<br>Meydana Gelen<br>Deprem Hk. Basın<br>Bülteni-19 | Earthquake                | 1 | 1 | 1 | 1: 533 | 1: 538 |
| Kahramanmaraş'ta<br>Meydana Gelen<br>Deprem Hk. Basın<br>Bülteni-19 | Kahramanmaraş             | 1 | 0 | 0 | 1: 596 | 1: 608 |
| Kahramanmaraş'ta<br>Meydana Gelen<br>Deprem Hk. Basın<br>Bülteni-19 | Pazarcık                  | 0 | 1 | 0 | 1: 596 | 1: 608 |
| Kahramanmaraş'ta<br>Meydana Gelen<br>Deprem Hk. Basın<br>Bülteni-19 | AFAD                      | 1 | 1 | 1 | 1: 806 | 1: 809 |
| Kahramanmaraş'ta<br>Meydana Gelen<br>Deprem Hk. Basın<br>Bülteni-19 | AFAD                      | 1 | 1 | 1 | 1: 806 | 1: 809 |
| Kahramanmaraş'ta<br>Meydana Gelen<br>Deprem Hk. Basın<br>Bülteni-19 | Response\Coast guard&Navy | 1 | 1 | 1 | 1: 835 | 1: 848 |
| Kahramanmaraş'ta<br>Meydana Gelen<br>Deprem Hk. Basın<br>Bülteni-19 | Response\Coast guard&Navy | 1 | 1 | 1 | 1: 835 | 1: 848 |
| Kahramanmaraş'ta<br>Meydana Gelen<br>Deprem Hk. Basın<br>Bülteni-19 | Response\Number of staff  | 1 | 0 | 0 | 1: 912 | 1: 934 |
| Kahramanmaraş'ta<br>Meydana Gelen<br>Deprem Hk. Basın<br>Bülteni-19 | Response\Search&Rescue    | 1 | 1 | 1 | 1: 912 | 1: 925 |
| Kahramanmaraş'ta<br>Meydana Gelen<br>Deprem Hk. Basın<br>Bülteni-19 | Response\Search&Rescue    | 1 | 1 | 1 | 1: 912 | 1: 925 |
| Kahramanmaraş'ta<br>Meydana Gelen<br>Deprem Hk. Basın<br>Bülteni-19 | Response\Number           | 0 | 1 | 0 | 1: 912 | 1: 934 |



|                                                                     |                          |   |   |   |         |         |
|---------------------------------------------------------------------|--------------------------|---|---|---|---------|---------|
| Kahramanmaraş'ta<br>Meydana Gelen<br>Deprem Hk. Basın<br>Bülteni-19 | Response\Number of staff | 1 | 0 | 0 | 1: 963  | 1: 985  |
| Kahramanmaraş'ta<br>Meydana Gelen<br>Deprem Hk. Basın<br>Bülteni-19 | Response\Search&Rescue   | 1 | 1 | 1 | 1: 963  | 1: 976  |
| Kahramanmaraş'ta<br>Meydana Gelen<br>Deprem Hk. Basın<br>Bülteni-19 | Response\Search&Rescue   | 1 | 1 | 1 | 1: 963  | 1: 976  |
| Kahramanmaraş'ta<br>Meydana Gelen<br>Deprem Hk. Basın<br>Bülteni-19 | Response\Number          | 0 | 1 | 0 | 1: 963  | 1: 985  |
| Kahramanmaraş'ta<br>Meydana Gelen<br>Deprem Hk. Basın<br>Bülteni-19 | Response\Number of staff | 1 | 0 | 0 | 1: 1086 | 1: 1108 |
| Kahramanmaraş'ta<br>Meydana Gelen<br>Deprem Hk. Basın<br>Bülteni-19 | Response\Search&Rescue   | 1 | 1 | 1 | 1: 1086 | 1: 1099 |
| Kahramanmaraş'ta<br>Meydana Gelen<br>Deprem Hk. Basın<br>Bülteni-19 | Response\Search&Rescue   | 1 | 1 | 1 | 1: 1086 | 1: 1099 |
| Kahramanmaraş'ta<br>Meydana Gelen<br>Deprem Hk. Basın<br>Bülteni-19 | Response\Number          | 0 | 1 | 0 | 1: 1086 | 1: 1108 |
| Kahramanmaraş'ta<br>Meydana Gelen<br>Deprem Hk. Basın<br>Bülteni-19 | AFAD                     | 1 | 1 | 1 | 1: 1137 | 1: 1140 |
| Kahramanmaraş'ta<br>Meydana Gelen<br>Deprem Hk. Basın<br>Bülteni-19 | AFAD                     | 1 | 1 | 1 | 1: 1137 | 1: 1140 |
| Kahramanmaraş'ta<br>Meydana Gelen<br>Deprem Hk. Basın<br>Bülteni-19 | Response\Military        | 1 | 1 | 1 | 1: 1152 | 1: 1159 |
| Kahramanmaraş'ta<br>Meydana Gelen<br>Deprem Hk. Basın<br>Bülteni-19 | Response\Military        | 1 | 1 | 1 | 1: 1152 | 1: 1159 |
| Kahramanmaraş'ta<br>Meydana Gelen<br>Deprem Hk. Basın<br>Bülteni-19 | Response\Number of staff | 1 | 0 | 0 | 1: 1272 | 1: 1286 |
| Kahramanmaraş'ta<br>Meydana Gelen<br>Deprem Hk. Basın<br>Bülteni-19 | Response\Number          | 0 | 1 | 0 | 1: 1272 | 1: 1286 |
| Kahramanmaraş'ta<br>Meydana Gelen<br>Deprem Hk. Basın<br>Bülteni-19 | Response\Number of staff | 1 | 0 | 0 | 1: 1328 | 1: 1342 |
| Kahramanmaraş'ta<br>Meydana Gelen<br>Deprem Hk. Basın<br>Bülteni-19 | Response\Number          | 0 | 1 | 0 | 1: 1328 | 1: 1342 |
| Kahramanmaraş'ta<br>Meydana Gelen<br>Deprem Hk. Basın<br>Bülteni-19 | Disaster                 | 1 | 1 | 1 | 1: 1358 | 1: 1361 |
| Kahramanmaraş'ta<br>Meydana Gelen<br>Deprem Hk. Basın<br>Bülteni-19 | Disaster                 | 1 | 1 | 1 | 1: 1358 | 1: 1361 |
| Kahramanmaraş'ta<br>Meydana Gelen<br>Deprem Hk. Basın<br>Bülteni-19 | Disaster                 | 1 | 1 | 1 | 1: 1522 | 1: 1525 |
| Kahramanmaraş'ta<br>Meydana Gelen<br>Deprem Hk. Basın<br>Bülteni-19 | Disaster                 | 1 | 1 | 1 | 1: 1522 | 1: 1525 |

|                                                                     |                           |   |   |   |         |         |
|---------------------------------------------------------------------|---------------------------|---|---|---|---------|---------|
| Kahramanmaraş'ta<br>Meydana Gelen<br>Deprem Hk. Basın<br>Bülteni-19 | AFAD                      | 1 | 1 | 1 | 1: 1576 | 1: 1579 |
| Kahramanmaraş'ta<br>Meydana Gelen<br>Deprem Hk. Basın<br>Bülteni-19 | AFAD                      | 1 | 1 | 1 | 1: 1576 | 1: 1579 |
| Kahramanmaraş'ta<br>Meydana Gelen<br>Deprem Hk. Basın<br>Bülteni-19 | Response\Coast guard&Navy | 1 | 1 | 1 | 1: 1669 | 1: 1682 |
| Kahramanmaraş'ta<br>Meydana Gelen<br>Deprem Hk. Basın<br>Bülteni-19 | Response\Coast guard&Navy | 1 | 1 | 1 | 1: 1669 | 1: 1682 |
| Kahramanmaraş'ta<br>Meydana Gelen<br>Deprem Hk. Basın<br>Bülteni-19 | Response\Military         | 1 | 1 | 1 | 1: 1687 | 1: 1694 |
| Kahramanmaraş'ta<br>Meydana Gelen<br>Deprem Hk. Basın<br>Bülteni-19 | Response\Military         | 1 | 1 | 1 | 1: 1687 | 1: 1694 |
| Kahramanmaraş'ta<br>Meydana Gelen<br>Deprem Hk. Basın<br>Bülteni-19 | Shelter&meal\Evacuation   | 1 | 1 | 1 | 1: 1861 | 1: 1867 |
| Kahramanmaraş'ta<br>Meydana Gelen<br>Deprem Hk. Basın<br>Bülteni-19 | Shelter&meal\Evacuation   | 1 | 1 | 1 | 1: 1861 | 1: 1867 |
| Kahramanmaraş'ta<br>Meydana Gelen<br>Deprem Hk. Basın<br>Bülteni-19 | Response\Coast guard&Navy | 1 | 1 | 1 | 1: 1878 | 1: 1893 |
| Kahramanmaraş'ta<br>Meydana Gelen<br>Deprem Hk. Basın<br>Bülteni-19 | Response\Coast guard&Navy | 1 | 1 | 1 | 1: 1878 | 1: 1893 |
| Kahramanmaraş'ta<br>Meydana Gelen<br>Deprem Hk. Basın<br>Bülteni-19 | Response\Coast guard&Navy | 1 | 1 | 1 | 1: 1922 | 1: 1935 |
| Kahramanmaraş'ta<br>Meydana Gelen<br>Deprem Hk. Basın<br>Bülteni-19 | Response\Coast guard&Navy | 1 | 1 | 1 | 1: 1922 | 1: 1935 |
| Kahramanmaraş'ta<br>Meydana Gelen<br>Deprem Hk. Basın<br>Bülteni-19 | Disaster                  | 1 | 1 | 1 | 1: 2012 | 1: 2015 |
| Kahramanmaraş'ta<br>Meydana Gelen<br>Deprem Hk. Basın<br>Bülteni-19 | Disaster                  | 1 | 1 | 1 | 1: 2012 | 1: 2015 |
| Kahramanmaraş'ta<br>Meydana Gelen<br>Deprem Hk. Basın<br>Bülteni-19 | Shelter&meal\Sheltering   | 1 | 1 | 1 | 1: 2017 | 1: 2023 |
| Kahramanmaraş'ta<br>Meydana Gelen<br>Deprem Hk. Basın<br>Bülteni-19 | Shelter&meal\Sheltering   | 1 | 1 | 1 | 1: 2017 | 1: 2023 |
| Kahramanmaraş'ta<br>Meydana Gelen<br>Deprem Hk. Basın<br>Bülteni-19 | Earthquake                | 1 | 1 | 1 | 1: 2032 | 1: 2037 |
| Kahramanmaraş'ta<br>Meydana Gelen<br>Deprem Hk. Basın<br>Bülteni-19 | Earthquake                | 1 | 1 | 1 | 1: 2032 | 1: 2037 |
| Kahramanmaraş'ta<br>Meydana Gelen<br>Deprem Hk. Basın<br>Bülteni-19 | AFAD                      | 1 | 1 | 1 | 1: 2078 | 1: 2081 |
| Kahramanmaraş'ta<br>Meydana Gelen<br>Deprem Hk. Basın<br>Bülteni-19 | AFAD                      | 1 | 1 | 1 | 1: 2078 | 1: 2081 |

|                                                                        |                             |   |   |   |         |         |
|------------------------------------------------------------------------|-----------------------------|---|---|---|---------|---------|
| Kahramanmaraş'ta<br>Meydana Gelen<br>Depremier Hk. Basın<br>Bülteni-19 | Response\Welfare service    | 1 | 1 | 1 | 1: 2092 | 1: 2104 |
| Kahramanmaraş'ta<br>Meydana Gelen<br>Depremier Hk. Basın<br>Bülteni-19 | Response\Welfare service    | 1 | 1 | 1 | 1: 2092 | 1: 2104 |
| Kahramanmaraş'ta<br>Meydana Gelen<br>Depremier Hk. Basın<br>Bülteni-19 | Shelter&meal\Tent           | 1 | 1 | 1 | 1: 2150 | 1: 2154 |
| Kahramanmaraş'ta<br>Meydana Gelen<br>Depremier Hk. Basın<br>Bülteni-19 | Shelter&meal\Tent           | 1 | 1 | 1 | 1: 2150 | 1: 2154 |
| Kahramanmaraş'ta<br>Meydana Gelen<br>Depremier Hk. Basın<br>Bülteni-19 | Shelter&meal\Tent           | 1 | 1 | 1 | 1: 2215 | 1: 2219 |
| Kahramanmaraş'ta<br>Meydana Gelen<br>Depremier Hk. Basın<br>Bülteni-19 | Shelter&meal\Tent           | 1 | 1 | 1 | 1: 2215 | 1: 2219 |
| Kahramanmaraş'ta<br>Meydana Gelen<br>Depremier Hk. Basın<br>Bülteni-19 | Disaster                    | 1 | 1 | 1 | 1: 2251 | 1: 2254 |
| Kahramanmaraş'ta<br>Meydana Gelen<br>Depremier Hk. Basın<br>Bülteni-19 | Disaster                    | 1 | 1 | 1 | 1: 2251 | 1: 2254 |
| Kahramanmaraş'ta<br>Meydana Gelen<br>Depremier Hk. Basın<br>Bülteni-19 | AFAD                        | 1 | 1 | 1 | 1: 2281 | 1: 2284 |
| Kahramanmaraş'ta<br>Meydana Gelen<br>Depremier Hk. Basın<br>Bülteni-19 | AFAD                        | 1 | 1 | 1 | 1: 2281 | 1: 2284 |
| Kahramanmaraş'ta<br>Meydana Gelen<br>Depremier Hk. Basın<br>Bülteni-19 | Response\Military           | 1 | 1 | 1 | 1: 2292 | 1: 2299 |
| Kahramanmaraş'ta<br>Meydana Gelen<br>Depremier Hk. Basın<br>Bülteni-19 | Response\Military           | 1 | 1 | 1 | 1: 2292 | 1: 2299 |
| Kahramanmaraş'ta<br>Meydana Gelen<br>Depremier Hk. Basın<br>Bülteni-19 | Coordination\NGO            | 1 | 1 | 1 | 1: 2304 | 1: 2315 |
| Kahramanmaraş'ta<br>Meydana Gelen<br>Depremier Hk. Basın<br>Bülteni-19 | Coordination\NGO            | 1 | 1 | 1 | 1: 2304 | 1: 2315 |
| Kahramanmaraş'ta<br>Meydana Gelen<br>Depremier Hk. Basın<br>Bülteni-19 | Shelter&meal\Mobile kitchen | 1 | 1 | 1 | 1: 2395 | 1: 2406 |
| Kahramanmaraş'ta<br>Meydana Gelen<br>Depremier Hk. Basın<br>Bülteni-19 | Shelter&meal\Mobile kitchen | 1 | 1 | 1 | 1: 2395 | 1: 2406 |
| Kahramanmaraş'ta<br>Meydana Gelen<br>Depremier Hk. Basın<br>Bülteni-19 | Shelter&meal\Mobile bakery  | 1 | 1 | 1 | 1: 2443 | 1: 2453 |
| Kahramanmaraş'ta<br>Meydana Gelen<br>Depremier Hk. Basın<br>Bülteni-19 | Shelter&meal\Mobile bakery  | 1 | 1 | 1 | 1: 2443 | 1: 2453 |
| Kahramanmaraş'ta<br>Meydana Gelen<br>Depremier Hk. Basın<br>Bülteni-19 | Shelter&meal\Container      | 1 | 1 | 1 | 1: 2475 | 1: 2483 |
| Kahramanmaraş'ta<br>Meydana Gelen<br>Depremier Hk. Basın<br>Bülteni-19 | Shelter&meal\Container      | 1 | 1 | 1 | 1: 2475 | 1: 2483 |

|                                                                     |                               |   |   |   |         |         |
|---------------------------------------------------------------------|-------------------------------|---|---|---|---------|---------|
| Kahramanmaraş'ta<br>Meydana Gelen<br>Deprem Hk. Basın<br>Bülteni-19 | Disaster                      | 1 | 1 | 1 | 1: 2537 | 1: 2540 |
| Kahramanmaraş'ta<br>Meydana Gelen<br>Deprem Hk. Basın<br>Bülteni-19 | Disaster                      | 1 | 1 | 1 | 1: 2537 | 1: 2540 |
| Kahramanmaraş'ta<br>Meydana Gelen<br>Deprem Hk. Basın<br>Bülteni-19 | Shelter&meal\Hot meal         | 1 | 1 | 1 | 1: 2563 | 1: 2573 |
| Kahramanmaraş'ta<br>Meydana Gelen<br>Deprem Hk. Basın<br>Bülteni-19 | Shelter&meal\Hot meal         | 1 | 1 | 1 | 1: 2563 | 1: 2573 |
| Kahramanmaraş'ta<br>Meydana Gelen<br>Deprem Hk. Basın<br>Bülteni-19 | Disaster                      | 1 | 1 | 1 | 1: 2693 | 1: 2696 |
| Kahramanmaraş'ta<br>Meydana Gelen<br>Deprem Hk. Basın<br>Bülteni-19 | Disaster                      | 1 | 1 | 1 | 1: 2693 | 1: 2696 |
| Kahramanmaraş'ta<br>Meydana Gelen<br>Deprem Hk. Basın<br>Bülteni-19 | Response\Psychosocial support | 1 | 1 | 1 | 1: 2698 | 1: 2707 |
| Kahramanmaraş'ta<br>Meydana Gelen<br>Deprem Hk. Basın<br>Bülteni-19 | Response\Psychosocial support | 1 | 1 | 1 | 1: 2698 | 1: 2707 |
| Kahramanmaraş'ta<br>Meydana Gelen<br>Deprem Hk. Basın<br>Bülteni-19 | Response\Welfare service      | 1 | 1 | 1 | 1: 2731 | 1: 2743 |
| Kahramanmaraş'ta<br>Meydana Gelen<br>Deprem Hk. Basın<br>Bülteni-19 | Response\Welfare service      | 1 | 1 | 1 | 1: 2731 | 1: 2743 |
| Kahramanmaraş'ta<br>Meydana Gelen<br>Deprem Hk. Basın<br>Bülteni-19 | Kahramanmaraş                 | 1 | 0 | 0 | 1: 2754 | 1: 2766 |
| Kahramanmaraş'ta<br>Meydana Gelen<br>Deprem Hk. Basın<br>Bülteni-19 | Pazarcık                      | 0 | 1 | 0 | 1: 2754 | 1: 2766 |
| Kahramanmaraş'ta<br>Meydana Gelen<br>Deprem Hk. Basın<br>Bülteni-19 | Disaster                      | 1 | 1 | 1 | 1: 3064 | 1: 3067 |
| Kahramanmaraş'ta<br>Meydana Gelen<br>Deprem Hk. Basın<br>Bülteni-19 | Disaster                      | 1 | 1 | 1 | 1: 3064 | 1: 3067 |
| Kahramanmaraş'ta<br>Meydana Gelen<br>Deprem Hk. Basın<br>Bülteni-19 | Coordination\Public relations | 1 | 1 | 1 | 1: 3223 | 1: 3228 |
| Kahramanmaraş'ta<br>Meydana Gelen<br>Deprem Hk. Basın<br>Bülteni-19 | Coordination\Public relations | 1 | 1 | 1 | 1: 3223 | 1: 3228 |
| Kahramanmaraş'ta<br>Meydana Gelen<br>Deprem Hk. Basın<br>Bülteni-19 | Kahramanmaraş                 | 1 | 0 | 0 | 2: 17   | 2: 29   |
| Kahramanmaraş'ta<br>Meydana Gelen<br>Deprem Hk. Basın<br>Bülteni-19 | Pazarcık                      | 0 | 1 | 0 | 2: 17   | 2: 29   |
| Kahramanmaraş'ta<br>Meydana Gelen<br>Deprem Hk. Basın<br>Bülteni-19 | Earthquake                    | 1 | 1 | 1 | 2: 48   | 2: 53   |
| Kahramanmaraş'ta<br>Meydana Gelen<br>Deprem Hk. Basın<br>Bülteni-19 | Earthquake                    | 1 | 1 | 1 | 2: 48   | 2: 53   |

|                                                                     |                           |   |   |   |        |        |
|---------------------------------------------------------------------|---------------------------|---|---|---|--------|--------|
| Kahramanmaraş'ta<br>Meydana Gelen<br>Deprem Hk. Basın<br>Bülteni-19 | AFAD                      | 1 | 1 | 1 | 2: 92  | 2: 95  |
| Kahramanmaraş'ta<br>Meydana Gelen<br>Deprem Hk. Basın<br>Bülteni-19 | AFAD                      | 1 | 1 | 1 | 2: 92  | 2: 95  |
| Kahramanmaraş'ta<br>Meydana Gelen<br>Deprem Hk. Basın<br>Bülteni-19 | Earthquake                | 1 | 1 | 1 | 2: 134 | 2: 139 |
| Kahramanmaraş'ta<br>Meydana Gelen<br>Deprem Hk. Basın<br>Bülteni-19 | Earthquake                | 1 | 1 | 1 | 2: 134 | 2: 139 |
| Kahramanmaraş'ta<br>Meydana Gelen<br>Deprem Hk. Basın<br>Bülteni-19 | AFAD                      | 1 | 1 | 1 | 2: 178 | 2: 181 |
| Kahramanmaraş'ta<br>Meydana Gelen<br>Deprem Hk. Basın<br>Bülteni-19 | AFAD                      | 1 | 1 | 1 | 2: 178 | 2: 181 |
| Kahramanmaraş'ta<br>Meydana Gelen<br>Deprem Hk. Basın<br>Bülteni-19 | AFAD                      | 1 | 1 | 1 | 2: 236 | 2: 239 |
| Kahramanmaraş'ta<br>Meydana Gelen<br>Deprem Hk. Basın<br>Bülteni-19 | AFAD                      | 1 | 1 | 1 | 2: 236 | 2: 239 |
| Kahramanmaraş'ta<br>Meydana Gelen<br>Deprem Hk. Basın<br>Bülteni-19 | AFAD                      | 1 | 1 | 1 | 2: 353 | 2: 356 |
| Kahramanmaraş'ta<br>Meydana Gelen<br>Deprem Hk. Basın<br>Bülteni-19 | AFAD                      | 1 | 1 | 1 | 2: 353 | 2: 356 |
| Kahramanmaraş'ta<br>Meydana Gelen<br>Deprem Hk. Basın<br>Bülteni-19 | Response\Search&Rescue    | 1 | 1 | 1 | 2: 447 | 2: 460 |
| Kahramanmaraş'ta<br>Meydana Gelen<br>Deprem Hk. Basın<br>Bülteni-19 | Response\Search&Rescue    | 1 | 1 | 1 | 2: 447 | 2: 460 |
| Kahramanmaraş'ta<br>Meydana Gelen<br>Deprem Hk. Basın<br>Bülteni-19 | Disaster                  | 1 | 1 | 1 | 2: 511 | 2: 514 |
| Kahramanmaraş'ta<br>Meydana Gelen<br>Deprem Hk. Basın<br>Bülteni-19 | Disaster                  | 1 | 1 | 1 | 2: 511 | 2: 514 |
| Kahramanmaraş'ta<br>Meydana Gelen<br>Deprem Hk. Basın<br>Bülteni-19 | AFAD                      | 1 | 1 | 1 | 2: 529 | 2: 532 |
| Kahramanmaraş'ta<br>Meydana Gelen<br>Deprem Hk. Basın<br>Bülteni-19 | AFAD                      | 1 | 1 | 1 | 2: 529 | 2: 532 |
| Kahramanmaraş'ta<br>Meydana Gelen<br>Deprem Hk. Basın<br>Bülteni-19 | Preparedness\Preparedness | 1 | 1 | 1 | 2: 593 | 2: 603 |
| Kahramanmaraş'ta<br>Meydana Gelen<br>Deprem Hk. Basın<br>Bülteni-19 | Preparedness\Preparedness | 1 | 1 | 1 | 2: 593 | 2: 603 |
| Kahramanmaraş'ta<br>Meydana Gelen<br>Deprem Hk. Basın<br>Bülteni-19 | Disaster                  | 1 | 1 | 1 | 2: 593 | 2: 596 |
| Kahramanmaraş'ta<br>Meydana Gelen<br>Deprem Hk. Basın<br>Bülteni-19 | Disaster                  | 1 | 1 | 1 | 2: 593 | 2: 596 |

|                                                                     |                                 |   |   |   |         |         |
|---------------------------------------------------------------------|---------------------------------|---|---|---|---------|---------|
| Kahramanmaraş'ta<br>Meydana Gelen<br>Deprem Hk. Basın<br>Bülteni-19 | Disaster                        | 1 | 1 | 1 | 2: 641  | 2: 644  |
| Kahramanmaraş'ta<br>Meydana Gelen<br>Deprem Hk. Basın<br>Bülteni-19 | Disaster                        | 1 | 1 | 1 | 2: 641  | 2: 644  |
| Kahramanmaraş'ta<br>Meydana Gelen<br>Deprem Hk. Basın<br>Bülteni-19 | Recovery\Fund drive             | 1 | 1 | 1 | 2: 702  | 2: 720  |
| Kahramanmaraş'ta<br>Meydana Gelen<br>Deprem Hk. Basın<br>Bülteni-19 | Recovery\Fund drive             | 1 | 1 | 1 | 2: 702  | 2: 720  |
| Kahramanmaraş'ta<br>Meydana Gelen<br>Deprem Hk. Basın<br>Bülteni-19 | Coordination\Social media       | 1 | 0 | 0 | 2: 818  | 2: 829  |
| Kahramanmaraş'ta<br>Meydana Gelen<br>Deprem Hk. Basın<br>Bülteni-19 | Coordination\Social media usage | 0 | 1 | 0 | 2: 818  | 2: 829  |
| Kahramanmaraş'ta<br>Meydana Gelen<br>Deprem Hk. Basın<br>Bülteni-19 | AFAD                            | 1 | 1 | 1 | 2: 874  | 2: 877  |
| Kahramanmaraş'ta<br>Meydana Gelen<br>Deprem Hk. Basın<br>Bülteni-19 | AFAD                            | 1 | 1 | 1 | 2: 874  | 2: 877  |
| Kahramanmaraş'ta<br>Meydana Gelen<br>Deprem Hk. Basın<br>Bülteni-19 | AFAD                            | 1 | 1 | 1 | 2: 896  | 2: 899  |
| Kahramanmaraş'ta<br>Meydana Gelen<br>Deprem Hk. Basın<br>Bülteni-19 | AFAD                            | 1 | 1 | 1 | 2: 896  | 2: 899  |
| Kahramanmaraş'ta<br>Meydana Gelen<br>Deprem Hk. Basın<br>Bülteni-19 | Coordination\Information        | 1 | 1 | 1 | 2: 941  | 2: 952  |
| Kahramanmaraş'ta<br>Meydana Gelen<br>Deprem Hk. Basın<br>Bülteni-19 | Coordination\Information        | 1 | 1 | 1 | 2: 941  | 2: 952  |
| Kahramanmaraş'ta<br>Meydana Gelen<br>Deprem Hk. Basın<br>Bülteni-19 | Recovery\Peacemaking            | 1 | 1 | 1 | 2: 957  | 2: 966  |
| Kahramanmaraş'ta<br>Meydana Gelen<br>Deprem Hk. Basın<br>Bülteni-19 | Recovery\Peacemaking            | 1 | 1 | 1 | 2: 957  | 2: 966  |
| Kahramanmaraş'ta<br>Meydana Gelen<br>Deprem Hk. Basın<br>Bülteni-19 | Coordination\Social media       | 1 | 0 | 0 | 2: 1013 | 2: 1024 |
| Kahramanmaraş'ta<br>Meydana Gelen<br>Deprem Hk. Basın<br>Bülteni-19 | Coordination\Social media usage | 0 | 1 | 0 | 2: 1013 | 2: 1024 |
| Kahramanmaraş'ta<br>Meydana Gelen<br>Deprem Hk. Basın<br>Bülteni-19 | Disaster                        | 1 | 1 | 1 | 2: 1115 | 2: 1118 |
| Kahramanmaraş'ta<br>Meydana Gelen<br>Deprem Hk. Basın<br>Bülteni-19 | Disaster                        | 1 | 1 | 1 | 2: 1115 | 2: 1118 |
| Kahramanmaraş'ta<br>Meydana Gelen<br>Deprem Hk. Basın<br>Bülteni-19 | Emergency                       | 1 | 1 | 1 | 2: 1123 | 2: 1132 |
| Kahramanmaraş'ta<br>Meydana Gelen<br>Deprem Hk. Basın<br>Bülteni-19 | Emergency                       | 1 | 1 | 1 | 2: 1123 | 2: 1132 |

|                                                                      |               |   |   |   |        |        |
|----------------------------------------------------------------------|---------------|---|---|---|--------|--------|
| Kahramanmaraş'ta<br>Meydana Gelen<br>Deprem Hk. Basın<br>Bülteni- 26 | Kahramanmaraş | 1 | 0 | 0 | 1: 17  | 1: 29  |
| Kahramanmaraş'ta<br>Meydana Gelen<br>Deprem Hk. Basın<br>Bülteni- 26 | Pazarcık      | 0 | 1 | 0 | 1: 17  | 1: 29  |
| Kahramanmaraş'ta<br>Meydana Gelen<br>Deprem Hk. Basın<br>Bülteni- 26 | Earthquake    | 1 | 1 | 1 | 1: 48  | 1: 53  |
| Kahramanmaraş'ta<br>Meydana Gelen<br>Deprem Hk. Basın<br>Bülteni- 26 | Earthquake    | 1 | 1 | 1 | 1: 48  | 1: 53  |
| Kahramanmaraş'ta<br>Meydana Gelen<br>Deprem Hk. Basın<br>Bülteni- 26 | AFAD          | 1 | 1 | 1 | 1: 93  | 1: 96  |
| Kahramanmaraş'ta<br>Meydana Gelen<br>Deprem Hk. Basın<br>Bülteni- 26 | AFAD          | 1 | 1 | 1 | 1: 93  | 1: 96  |
| Kahramanmaraş'ta<br>Meydana Gelen<br>Deprem Hk. Basın<br>Bülteni- 26 | Earthquake    | 1 | 1 | 1 | 1: 135 | 1: 140 |
| Kahramanmaraş'ta<br>Meydana Gelen<br>Deprem Hk. Basın<br>Bülteni- 26 | Earthquake    | 1 | 1 | 1 | 1: 135 | 1: 140 |
| Kahramanmaraş'ta<br>Meydana Gelen<br>Deprem Hk. Basın<br>Bülteni- 26 | Kahramanmaraş | 1 | 0 | 0 | 1: 170 | 1: 182 |
| Kahramanmaraş'ta<br>Meydana Gelen<br>Deprem Hk. Basın<br>Bülteni- 26 | Pazarcık      | 0 | 1 | 0 | 1: 170 | 1: 182 |
| Kahramanmaraş'ta<br>Meydana Gelen<br>Deprem Hk. Basın<br>Bülteni- 26 | Earthquake    | 1 | 1 | 1 | 1: 201 | 1: 206 |
| Kahramanmaraş'ta<br>Meydana Gelen<br>Deprem Hk. Basın<br>Bülteni- 26 | Earthquake    | 1 | 1 | 1 | 1: 201 | 1: 206 |
| Kahramanmaraş'ta<br>Meydana Gelen<br>Deprem Hk. Basın<br>Bülteni- 26 | Kahramanmaraş | 1 | 0 | 0 | 1: 284 | 1: 296 |
| Kahramanmaraş'ta<br>Meydana Gelen<br>Deprem Hk. Basın<br>Bülteni- 26 | Pazarcık      | 0 | 1 | 0 | 1: 284 | 1: 296 |
| Kahramanmaraş'ta<br>Meydana Gelen<br>Deprem Hk. Basın<br>Bülteni- 26 | Earthquake    | 1 | 1 | 1 | 1: 315 | 1: 320 |
| Kahramanmaraş'ta<br>Meydana Gelen<br>Deprem Hk. Basın<br>Bülteni- 26 | Earthquake    | 1 | 1 | 1 | 1: 315 | 1: 320 |
| Kahramanmaraş'ta<br>Meydana Gelen<br>Deprem Hk. Basın<br>Bülteni- 26 | Kahramanmaraş | 1 | 0 | 0 | 1: 381 | 1: 393 |
| Kahramanmaraş'ta<br>Meydana Gelen<br>Deprem Hk. Basın<br>Bülteni- 26 | Pazarcık      | 0 | 1 | 0 | 1: 381 | 1: 393 |
| Kahramanmaraş'ta<br>Meydana Gelen<br>Deprem Hk. Basın<br>Bülteni- 26 | Earthquake    | 1 | 1 | 1 | 1: 476 | 1: 481 |
| Kahramanmaraş'ta<br>Meydana Gelen<br>Deprem Hk. Basın<br>Bülteni- 26 | Earthquake    | 1 | 1 | 1 | 1: 476 | 1: 481 |

|                                                                      |                           |   |   |   |         |         |
|----------------------------------------------------------------------|---------------------------|---|---|---|---------|---------|
| Kahramanmaraş'ta<br>Meydana Gelen<br>Deprem Hk. Basın<br>Bülteni- 26 | Earthquake                | 1 | 1 | 1 | 1: 503  | 1: 508  |
| Kahramanmaraş'ta<br>Meydana Gelen<br>Deprem Hk. Basın<br>Bülteni- 26 | Earthquake                | 1 | 1 | 1 | 1: 503  | 1: 508  |
| Kahramanmaraş'ta<br>Meydana Gelen<br>Deprem Hk. Basın<br>Bülteni- 26 | Earthquake                | 1 | 1 | 1 | 1: 536  | 1: 541  |
| Kahramanmaraş'ta<br>Meydana Gelen<br>Deprem Hk. Basın<br>Bülteni- 26 | Earthquake                | 1 | 1 | 1 | 1: 536  | 1: 541  |
| Kahramanmaraş'ta<br>Meydana Gelen<br>Deprem Hk. Basın<br>Bülteni- 26 | Kahramanmaraş             | 1 | 0 | 0 | 1: 599  | 1: 611  |
| Kahramanmaraş'ta<br>Meydana Gelen<br>Deprem Hk. Basın<br>Bülteni- 26 | Pazarcık                  | 0 | 1 | 0 | 1: 599  | 1: 611  |
| Kahramanmaraş'ta<br>Meydana Gelen<br>Deprem Hk. Basın<br>Bülteni- 26 | Disaster                  | 1 | 1 | 1 | 1: 808  | 1: 811  |
| Kahramanmaraş'ta<br>Meydana Gelen<br>Deprem Hk. Basın<br>Bülteni- 26 | Disaster                  | 1 | 1 | 1 | 1: 808  | 1: 811  |
| Kahramanmaraş'ta<br>Meydana Gelen<br>Deprem Hk. Basın<br>Bülteni- 26 | Shelter&meal\Evacuation   | 1 | 1 | 1 | 1: 840  | 1: 846  |
| Kahramanmaraş'ta<br>Meydana Gelen<br>Deprem Hk. Basın<br>Bülteni- 26 | Shelter&meal\Evacuation   | 1 | 1 | 1 | 1: 840  | 1: 846  |
| Kahramanmaraş'ta<br>Meydana Gelen<br>Deprem Hk. Basın<br>Bülteni- 26 | AFAD                      | 1 | 1 | 1 | 1: 870  | 1: 873  |
| Kahramanmaraş'ta<br>Meydana Gelen<br>Deprem Hk. Basın<br>Bülteni- 26 | AFAD                      | 1 | 1 | 1 | 1: 870  | 1: 873  |
| Kahramanmaraş'ta<br>Meydana Gelen<br>Deprem Hk. Basın<br>Bülteni- 26 | Response\Coast guard&Navy | 1 | 1 | 1 | 1: 899  | 1: 912  |
| Kahramanmaraş'ta<br>Meydana Gelen<br>Deprem Hk. Basın<br>Bülteni- 26 | Response\Coast guard&Navy | 1 | 1 | 1 | 1: 899  | 1: 912  |
| Kahramanmaraş'ta<br>Meydana Gelen<br>Deprem Hk. Basın<br>Bülteni- 26 | Response\Number of staff  | 1 | 0 | 0 | 1: 976  | 1: 998  |
| Kahramanmaraş'ta<br>Meydana Gelen<br>Deprem Hk. Basın<br>Bülteni- 26 | Response\Search&Rescue    | 1 | 1 | 1 | 1: 976  | 1: 989  |
| Kahramanmaraş'ta<br>Meydana Gelen<br>Deprem Hk. Basın<br>Bülteni- 26 | Response\Search&Rescue    | 1 | 1 | 1 | 1: 976  | 1: 989  |
| Kahramanmaraş'ta<br>Meydana Gelen<br>Deprem Hk. Basın<br>Bülteni- 26 | Response\Number           | 0 | 1 | 0 | 1: 976  | 1: 998  |
| Kahramanmaraş'ta<br>Meydana Gelen<br>Deprem Hk. Basın<br>Bülteni- 26 | Response\Number of staff  | 1 | 0 | 0 | 1: 1027 | 1: 1049 |
| Kahramanmaraş'ta<br>Meydana Gelen<br>Deprem Hk. Basın<br>Bülteni- 26 | Response\Search&Rescue    | 1 | 1 | 1 | 1: 1027 | 1: 1040 |



|                                                                      |                          |   |   |   |         |         |
|----------------------------------------------------------------------|--------------------------|---|---|---|---------|---------|
| Kahramanmaraş'ta<br>Meydana Gelen<br>Deprem Hk. Basın<br>Bülteni- 26 | Response\Search&Rescue   | 1 | 1 | 1 | 1: 1027 | 1: 1040 |
| Kahramanmaraş'ta<br>Meydana Gelen<br>Deprem Hk. Basın<br>Bülteni- 26 | Response\Number          | 0 | 1 | 0 | 1: 1027 | 1: 1049 |
| Kahramanmaraş'ta<br>Meydana Gelen<br>Deprem Hk. Basın<br>Bülteni- 26 | Response\Number of staff | 1 | 0 | 0 | 1: 1150 | 1: 1172 |
| Kahramanmaraş'ta<br>Meydana Gelen<br>Deprem Hk. Basın<br>Bülteni- 26 | Response\Search&Rescue   | 1 | 1 | 1 | 1: 1150 | 1: 1163 |
| Kahramanmaraş'ta<br>Meydana Gelen<br>Deprem Hk. Basın<br>Bülteni- 26 | Response\Search&Rescue   | 1 | 1 | 1 | 1: 1150 | 1: 1163 |
| Kahramanmaraş'ta<br>Meydana Gelen<br>Deprem Hk. Basın<br>Bülteni- 26 | Response\Number          | 0 | 1 | 0 | 1: 1150 | 1: 1172 |
| Kahramanmaraş'ta<br>Meydana Gelen<br>Deprem Hk. Basın<br>Bülteni- 26 | Disaster                 | 1 | 1 | 1 | 1: 1207 | 1: 1210 |
| Kahramanmaraş'ta<br>Meydana Gelen<br>Deprem Hk. Basın<br>Bülteni- 26 | Disaster                 | 1 | 1 | 1 | 1: 1207 | 1: 1210 |
| Kahramanmaraş'ta<br>Meydana Gelen<br>Deprem Hk. Basın<br>Bülteni- 26 | AFAD                     | 1 | 1 | 1 | 1: 1303 | 1: 1306 |
| Kahramanmaraş'ta<br>Meydana Gelen<br>Deprem Hk. Basın<br>Bülteni- 26 | AFAD                     | 1 | 1 | 1 | 1: 1303 | 1: 1306 |
| Kahramanmaraş'ta<br>Meydana Gelen<br>Deprem Hk. Basın<br>Bülteni- 26 | Response\Military        | 1 | 1 | 1 | 1: 1318 | 1: 1325 |
| Kahramanmaraş'ta<br>Meydana Gelen<br>Deprem Hk. Basın<br>Bülteni- 26 | Response\Military        | 1 | 1 | 1 | 1: 1318 | 1: 1325 |
| Kahramanmaraş'ta<br>Meydana Gelen<br>Deprem Hk. Basın<br>Bülteni- 26 | Response\Number of staff | 1 | 0 | 0 | 1: 1437 | 1: 1451 |
| Kahramanmaraş'ta<br>Meydana Gelen<br>Deprem Hk. Basın<br>Bülteni- 26 | Response\Number          | 0 | 1 | 0 | 1: 1437 | 1: 1451 |
| Kahramanmaraş'ta<br>Meydana Gelen<br>Deprem Hk. Basın<br>Bülteni- 26 | Response\Number of staff | 1 | 0 | 0 | 1: 1493 | 1: 1507 |
| Kahramanmaraş'ta<br>Meydana Gelen<br>Deprem Hk. Basın<br>Bülteni- 26 | Response\Number          | 0 | 1 | 0 | 1: 1493 | 1: 1507 |
| Kahramanmaraş'ta<br>Meydana Gelen<br>Deprem Hk. Basın<br>Bülteni- 26 | Disaster                 | 1 | 1 | 1 | 1: 1523 | 1: 1526 |
| Kahramanmaraş'ta<br>Meydana Gelen<br>Deprem Hk. Basın<br>Bülteni- 26 | Disaster                 | 1 | 1 | 1 | 1: 1523 | 1: 1526 |
| Kahramanmaraş'ta<br>Meydana Gelen<br>Deprem Hk. Basın<br>Bülteni- 26 | Disaster                 | 1 | 1 | 1 | 1: 1688 | 1: 1691 |
| Kahramanmaraş'ta<br>Meydana Gelen<br>Deprem Hk. Basın<br>Bülteni- 26 | Disaster                 | 1 | 1 | 1 | 1: 1688 | 1: 1691 |

|                                                                      |                           |   |   |   |         |         |
|----------------------------------------------------------------------|---------------------------|---|---|---|---------|---------|
| Kahramanmaraş'ta<br>Meydana Gelen<br>Deprem Hk. Basın<br>Bülteni- 26 | AFAD                      | 1 | 1 | 1 | 1: 1742 | 1: 1745 |
| Kahramanmaraş'ta<br>Meydana Gelen<br>Deprem Hk. Basın<br>Bülteni- 26 | AFAD                      | 1 | 1 | 1 | 1: 1742 | 1: 1745 |
| Kahramanmaraş'ta<br>Meydana Gelen<br>Deprem Hk. Basın<br>Bülteni- 26 | Response\Coast guard&Navy | 1 | 1 | 1 | 1: 1907 | 1: 1920 |
| Kahramanmaraş'ta<br>Meydana Gelen<br>Deprem Hk. Basın<br>Bülteni- 26 | Response\Coast guard&Navy | 1 | 1 | 1 | 1: 1907 | 1: 1920 |
| Kahramanmaraş'ta<br>Meydana Gelen<br>Deprem Hk. Basın<br>Bülteni- 26 | Response\Military         | 1 | 1 | 1 | 1: 1925 | 1: 1932 |
| Kahramanmaraş'ta<br>Meydana Gelen<br>Deprem Hk. Basın<br>Bülteni- 26 | Response\Military         | 1 | 1 | 1 | 1: 1925 | 1: 1932 |
| Kahramanmaraş'ta<br>Meydana Gelen<br>Deprem Hk. Basın<br>Bülteni- 26 | Shelter&meal\Evacuation   | 1 | 1 | 1 | 1: 2063 | 1: 2069 |
| Kahramanmaraş'ta<br>Meydana Gelen<br>Deprem Hk. Basın<br>Bülteni- 26 | Shelter&meal\Evacuation   | 1 | 1 | 1 | 1: 2063 | 1: 2069 |
| Kahramanmaraş'ta<br>Meydana Gelen<br>Deprem Hk. Basın<br>Bülteni- 26 | Response\Coast guard&Navy | 1 | 1 | 1 | 1: 2080 | 1: 2095 |
| Kahramanmaraş'ta<br>Meydana Gelen<br>Deprem Hk. Basın<br>Bülteni- 26 | Response\Coast guard&Navy | 1 | 1 | 1 | 1: 2080 | 1: 2095 |
| Kahramanmaraş'ta<br>Meydana Gelen<br>Deprem Hk. Basın<br>Bülteni- 26 | Response\Coast guard&Navy | 1 | 1 | 1 | 1: 2124 | 1: 2137 |
| Kahramanmaraş'ta<br>Meydana Gelen<br>Deprem Hk. Basın<br>Bülteni- 26 | Response\Coast guard&Navy | 1 | 1 | 1 | 1: 2124 | 1: 2137 |
| Kahramanmaraş'ta<br>Meydana Gelen<br>Deprem Hk. Basın<br>Bülteni- 26 | Disaster                  | 1 | 1 | 1 | 1: 2214 | 1: 2217 |
| Kahramanmaraş'ta<br>Meydana Gelen<br>Deprem Hk. Basın<br>Bülteni- 26 | Disaster                  | 1 | 1 | 1 | 1: 2214 | 1: 2217 |
| Kahramanmaraş'ta<br>Meydana Gelen<br>Deprem Hk. Basın<br>Bülteni- 26 | Shelter&meal\Sheltering   | 1 | 1 | 1 | 1: 2219 | 1: 2225 |
| Kahramanmaraş'ta<br>Meydana Gelen<br>Deprem Hk. Basın<br>Bülteni- 26 | Shelter&meal\Sheltering   | 1 | 1 | 1 | 1: 2219 | 1: 2225 |
| Kahramanmaraş'ta<br>Meydana Gelen<br>Deprem Hk. Basın<br>Bülteni- 26 | Earthquake                | 1 | 1 | 1 | 1: 2234 | 1: 2239 |
| Kahramanmaraş'ta<br>Meydana Gelen<br>Deprem Hk. Basın<br>Bülteni- 26 | Earthquake                | 1 | 1 | 1 | 1: 2234 | 1: 2239 |
| Kahramanmaraş'ta<br>Meydana Gelen<br>Deprem Hk. Basın<br>Bülteni- 26 | AFAD                      | 1 | 1 | 1 | 1: 2280 | 1: 2283 |
| Kahramanmaraş'ta<br>Meydana Gelen<br>Deprem Hk. Basın<br>Bülteni- 26 | AFAD                      | 1 | 1 | 1 | 1: 2280 | 1: 2283 |

|                                                                      |                             |   |   |   |         |         |
|----------------------------------------------------------------------|-----------------------------|---|---|---|---------|---------|
| Kahramanmaraş'ta<br>Meydana Gelen<br>Deprem Hk. Basın<br>Bülteni- 26 | Response\Welfare service    | 1 | 1 | 1 | 1: 2294 | 1: 2306 |
| Kahramanmaraş'ta<br>Meydana Gelen<br>Deprem Hk. Basın<br>Bülteni- 26 | Response\Welfare service    | 1 | 1 | 1 | 1: 2294 | 1: 2306 |
| Kahramanmaraş'ta<br>Meydana Gelen<br>Deprem Hk. Basın<br>Bülteni- 26 | Shelter&meal\Tent           | 1 | 1 | 1 | 1: 2380 | 1: 2384 |
| Kahramanmaraş'ta<br>Meydana Gelen<br>Deprem Hk. Basın<br>Bülteni- 26 | Shelter&meal\Tent           | 1 | 1 | 1 | 1: 2380 | 1: 2384 |
| Kahramanmaraş'ta<br>Meydana Gelen<br>Deprem Hk. Basın<br>Bülteni- 26 | Shelter&meal\Tent           | 1 | 1 | 1 | 1: 2445 | 1: 2449 |
| Kahramanmaraş'ta<br>Meydana Gelen<br>Deprem Hk. Basın<br>Bülteni- 26 | Shelter&meal\Tent           | 1 | 1 | 1 | 1: 2445 | 1: 2449 |
| Kahramanmaraş'ta<br>Meydana Gelen<br>Deprem Hk. Basın<br>Bülteni- 26 | Disaster                    | 1 | 1 | 1 | 1: 2481 | 1: 2484 |
| Kahramanmaraş'ta<br>Meydana Gelen<br>Deprem Hk. Basın<br>Bülteni- 26 | Disaster                    | 1 | 1 | 1 | 1: 2481 | 1: 2484 |
| Kahramanmaraş'ta<br>Meydana Gelen<br>Deprem Hk. Basın<br>Bülteni- 26 | AFAD                        | 1 | 1 | 1 | 1: 2511 | 1: 2514 |
| Kahramanmaraş'ta<br>Meydana Gelen<br>Deprem Hk. Basın<br>Bülteni- 26 | AFAD                        | 1 | 1 | 1 | 1: 2511 | 1: 2514 |
| Kahramanmaraş'ta<br>Meydana Gelen<br>Deprem Hk. Basın<br>Bülteni- 26 | Response\Military           | 1 | 1 | 1 | 1: 2522 | 1: 2529 |
| Kahramanmaraş'ta<br>Meydana Gelen<br>Deprem Hk. Basın<br>Bülteni- 26 | Response\Military           | 1 | 1 | 1 | 1: 2522 | 1: 2529 |
| Kahramanmaraş'ta<br>Meydana Gelen<br>Deprem Hk. Basın<br>Bülteni- 26 | Coordination\NGO            | 1 | 1 | 1 | 1: 2534 | 1: 2545 |
| Kahramanmaraş'ta<br>Meydana Gelen<br>Deprem Hk. Basın<br>Bülteni- 26 | Coordination\NGO            | 1 | 1 | 1 | 1: 2534 | 1: 2545 |
| Kahramanmaraş'ta<br>Meydana Gelen<br>Deprem Hk. Basın<br>Bülteni- 26 | Shelter&meal\Mobile kitchen | 1 | 1 | 1 | 1: 2626 | 1: 2637 |
| Kahramanmaraş'ta<br>Meydana Gelen<br>Deprem Hk. Basın<br>Bülteni- 26 | Shelter&meal\Mobile kitchen | 1 | 1 | 1 | 1: 2626 | 1: 2637 |
| Kahramanmaraş'ta<br>Meydana Gelen<br>Deprem Hk. Basın<br>Bülteni- 26 | Shelter&meal\Mobile bakery  | 1 | 1 | 1 | 1: 2660 | 1: 2670 |
| Kahramanmaraş'ta<br>Meydana Gelen<br>Deprem Hk. Basın<br>Bülteni- 26 | Shelter&meal\Mobile bakery  | 1 | 1 | 1 | 1: 2660 | 1: 2670 |
| Kahramanmaraş'ta<br>Meydana Gelen<br>Deprem Hk. Basın<br>Bülteni- 26 | Disaster                    | 1 | 1 | 1 | 1: 2718 | 1: 2721 |
| Kahramanmaraş'ta<br>Meydana Gelen<br>Deprem Hk. Basın<br>Bülteni- 26 | Disaster                    | 1 | 1 | 1 | 1: 2718 | 1: 2721 |

|                                                                      |                               |   |   |   |         |         |
|----------------------------------------------------------------------|-------------------------------|---|---|---|---------|---------|
| Kahramanmaraş'ta<br>Meydana Gelen<br>Deprem Hk. Basın<br>Bülteni- 26 | Shelter&meal\Hot meal         | 1 | 1 | 1 | 1: 2744 | 1: 2754 |
| Kahramanmaraş'ta<br>Meydana Gelen<br>Deprem Hk. Basın<br>Bülteni- 26 | Shelter&meal\Hot meal         | 1 | 1 | 1 | 1: 2744 | 1: 2754 |
| Kahramanmaraş'ta<br>Meydana Gelen<br>Deprem Hk. Basın<br>Bülteni- 26 | Disaster                      | 1 | 1 | 1 | 1: 2898 | 1: 2901 |
| Kahramanmaraş'ta<br>Meydana Gelen<br>Deprem Hk. Basın<br>Bülteni- 26 | Disaster                      | 1 | 1 | 1 | 1: 2898 | 1: 2901 |
| Kahramanmaraş'ta<br>Meydana Gelen<br>Deprem Hk. Basın<br>Bülteni- 26 | Response\Psychosocial support | 1 | 1 | 1 | 1: 2903 | 1: 2912 |
| Kahramanmaraş'ta<br>Meydana Gelen<br>Deprem Hk. Basın<br>Bülteni- 26 | Response\Psychosocial support | 1 | 1 | 1 | 1: 2903 | 1: 2912 |
| Kahramanmaraş'ta<br>Meydana Gelen<br>Deprem Hk. Basın<br>Bülteni- 26 | Response\Welfare service      | 1 | 1 | 1 | 1: 2936 | 1: 2948 |
| Kahramanmaraş'ta<br>Meydana Gelen<br>Deprem Hk. Basın<br>Bülteni- 26 | Response\Welfare service      | 1 | 1 | 1 | 1: 2936 | 1: 2948 |
| Kahramanmaraş'ta<br>Meydana Gelen<br>Deprem Hk. Basın<br>Bülteni- 26 | Kahramanmaraş                 | 1 | 0 | 0 | 1: 2959 | 1: 2971 |
| Kahramanmaraş'ta<br>Meydana Gelen<br>Deprem Hk. Basın<br>Bülteni- 26 | Pazarcık                      | 0 | 1 | 0 | 1: 2959 | 1: 2971 |
| Kahramanmaraş'ta<br>Meydana Gelen<br>Deprem Hk. Basın<br>Bülteni- 26 | Earthquake                    | 1 | 1 | 1 | 1: 3084 | 1: 3089 |
| Kahramanmaraş'ta<br>Meydana Gelen<br>Deprem Hk. Basın<br>Bülteni- 26 | Earthquake                    | 1 | 1 | 1 | 1: 3084 | 1: 3089 |
| Kahramanmaraş'ta<br>Meydana Gelen<br>Deprem Hk. Basın<br>Bülteni- 26 | Earthquake                    | 1 | 1 | 1 | 1: 3110 | 1: 3115 |
| Kahramanmaraş'ta<br>Meydana Gelen<br>Deprem Hk. Basın<br>Bülteni- 26 | Earthquake                    | 1 | 1 | 1 | 1: 3110 | 1: 3115 |
| Kahramanmaraş'ta<br>Meydana Gelen<br>Deprem Hk. Basın<br>Bülteni- 26 | Response\Psychosocial support | 1 | 1 | 1 | 1: 3175 | 1: 3185 |
| Kahramanmaraş'ta<br>Meydana Gelen<br>Deprem Hk. Basın<br>Bülteni- 26 | Response\Psychosocial support | 1 | 1 | 1 | 1: 3175 | 1: 3185 |
| Kahramanmaraş'ta<br>Meydana Gelen<br>Deprem Hk. Basın<br>Bülteni- 26 | Kahramanmaraş                 | 1 | 0 | 0 | 2: 17   | 2: 29   |
| Kahramanmaraş'ta<br>Meydana Gelen<br>Deprem Hk. Basın<br>Bülteni- 26 | Pazarcık                      | 0 | 1 | 0 | 2: 17   | 2: 29   |
| Kahramanmaraş'ta<br>Meydana Gelen<br>Deprem Hk. Basın<br>Bülteni- 26 | Earthquake                    | 1 | 1 | 1 | 2: 48   | 2: 53   |
| Kahramanmaraş'ta<br>Meydana Gelen<br>Deprem Hk. Basın<br>Bülteni- 26 | Earthquake                    | 1 | 1 | 1 | 2: 48   | 2: 53   |

|                                                                      |                               |   |   |   |        |        |
|----------------------------------------------------------------------|-------------------------------|---|---|---|--------|--------|
| Kahramanmaraş'ta<br>Meydana Gelen<br>Deprem Hk. Basın<br>Bülteni- 26 | AFAD                          | 1 | 1 | 1 | 2: 93  | 2: 96  |
| Kahramanmaraş'ta<br>Meydana Gelen<br>Deprem Hk. Basın<br>Bülteni- 26 | AFAD                          | 1 | 1 | 1 | 2: 93  | 2: 96  |
| Kahramanmaraş'ta<br>Meydana Gelen<br>Deprem Hk. Basın<br>Bülteni- 26 | Earthquake                    | 1 | 1 | 1 | 2: 135 | 2: 140 |
| Kahramanmaraş'ta<br>Meydana Gelen<br>Deprem Hk. Basın<br>Bülteni- 26 | Earthquake                    | 1 | 1 | 1 | 2: 135 | 2: 140 |
| Kahramanmaraş'ta<br>Meydana Gelen<br>Deprem Hk. Basın<br>Bülteni- 26 | Disaster                      | 1 | 1 | 1 | 2: 325 | 2: 328 |
| Kahramanmaraş'ta<br>Meydana Gelen<br>Deprem Hk. Basın<br>Bülteni- 26 | Disaster                      | 1 | 1 | 1 | 2: 325 | 2: 328 |
| Kahramanmaraş'ta<br>Meydana Gelen<br>Deprem Hk. Basın<br>Bülteni- 26 | Coordination\Public relations | 1 | 1 | 1 | 2: 484 | 2: 489 |
| Kahramanmaraş'ta<br>Meydana Gelen<br>Deprem Hk. Basın<br>Bülteni- 26 | Coordination\Public relations | 1 | 1 | 1 | 2: 484 | 2: 489 |
| Kahramanmaraş'ta<br>Meydana Gelen<br>Deprem Hk. Basın<br>Bülteni- 26 | AFAD                          | 1 | 1 | 1 | 2: 524 | 2: 527 |
| Kahramanmaraş'ta<br>Meydana Gelen<br>Deprem Hk. Basın<br>Bülteni- 26 | AFAD                          | 1 | 1 | 1 | 2: 524 | 2: 527 |
| Kahramanmaraş'ta<br>Meydana Gelen<br>Deprem Hk. Basın<br>Bülteni- 26 | AFAD                          | 1 | 1 | 1 | 2: 582 | 2: 585 |
| Kahramanmaraş'ta<br>Meydana Gelen<br>Deprem Hk. Basın<br>Bülteni- 26 | AFAD                          | 1 | 1 | 1 | 2: 582 | 2: 585 |
| Kahramanmaraş'ta<br>Meydana Gelen<br>Deprem Hk. Basın<br>Bülteni- 26 | AFAD                          | 1 | 1 | 1 | 2: 699 | 2: 702 |
| Kahramanmaraş'ta<br>Meydana Gelen<br>Deprem Hk. Basın<br>Bülteni- 26 | AFAD                          | 1 | 1 | 1 | 2: 699 | 2: 702 |
| Kahramanmaraş'ta<br>Meydana Gelen<br>Deprem Hk. Basın<br>Bülteni- 26 | Response\Search&Rescue        | 1 | 1 | 1 | 2: 793 | 2: 806 |
| Kahramanmaraş'ta<br>Meydana Gelen<br>Deprem Hk. Basın<br>Bülteni- 26 | Response\Search&Rescue        | 1 | 1 | 1 | 2: 793 | 2: 806 |
| Kahramanmaraş'ta<br>Meydana Gelen<br>Deprem Hk. Basın<br>Bülteni- 26 | Disaster                      | 1 | 1 | 1 | 2: 857 | 2: 860 |
| Kahramanmaraş'ta<br>Meydana Gelen<br>Deprem Hk. Basın<br>Bülteni- 26 | Disaster                      | 1 | 1 | 1 | 2: 857 | 2: 860 |
| Kahramanmaraş'ta<br>Meydana Gelen<br>Deprem Hk. Basın<br>Bülteni- 26 | AFAD                          | 1 | 1 | 1 | 2: 875 | 2: 878 |
| Kahramanmaraş'ta<br>Meydana Gelen<br>Deprem Hk. Basın<br>Bülteni- 26 | AFAD                          | 1 | 1 | 1 | 2: 875 | 2: 878 |

|                                                                      |                                 |   |   |   |         |         |
|----------------------------------------------------------------------|---------------------------------|---|---|---|---------|---------|
| Kahramanmaraş'ta<br>Meydana Gelen<br>Deprem Hk. Basın<br>Bülteni- 26 | Preparedness\Preparedness       | 1 | 1 | 1 | 2: 939  | 2: 949  |
| Kahramanmaraş'ta<br>Meydana Gelen<br>Deprem Hk. Basın<br>Bülteni- 26 | Preparedness\Preparedness       | 1 | 1 | 1 | 2: 939  | 2: 949  |
| Kahramanmaraş'ta<br>Meydana Gelen<br>Deprem Hk. Basın<br>Bülteni- 26 | Disaster                        | 1 | 1 | 1 | 2: 939  | 2: 942  |
| Kahramanmaraş'ta<br>Meydana Gelen<br>Deprem Hk. Basın<br>Bülteni- 26 | Disaster                        | 1 | 1 | 1 | 2: 939  | 2: 942  |
| Kahramanmaraş'ta<br>Meydana Gelen<br>Deprem Hk. Basın<br>Bülteni- 26 | Disaster                        | 1 | 1 | 1 | 2: 987  | 2: 990  |
| Kahramanmaraş'ta<br>Meydana Gelen<br>Deprem Hk. Basın<br>Bülteni- 26 | Disaster                        | 1 | 1 | 1 | 2: 987  | 2: 990  |
| Kahramanmaraş'ta<br>Meydana Gelen<br>Deprem Hk. Basın<br>Bülteni- 26 | Recovery\Fund drive             | 1 | 1 | 1 | 2: 1048 | 2: 1066 |
| Kahramanmaraş'ta<br>Meydana Gelen<br>Deprem Hk. Basın<br>Bülteni- 26 | Recovery\Fund drive             | 1 | 1 | 1 | 2: 1048 | 2: 1066 |
| Kahramanmaraş'ta<br>Meydana Gelen<br>Deprem Hk. Basın<br>Bülteni- 26 | Coordination\Social media       | 1 | 0 | 0 | 2: 1164 | 2: 1175 |
| Kahramanmaraş'ta<br>Meydana Gelen<br>Deprem Hk. Basın<br>Bülteni- 26 | Coordination\Social media usage | 0 | 1 | 0 | 2: 1164 | 2: 1175 |
| Kahramanmaraş'ta<br>Meydana Gelen<br>Deprem Hk. Basın<br>Bülteni- 26 | AFAD                            | 1 | 1 | 1 | 2: 1220 | 2: 1223 |
| Kahramanmaraş'ta<br>Meydana Gelen<br>Deprem Hk. Basın<br>Bülteni- 26 | AFAD                            | 1 | 1 | 1 | 2: 1220 | 2: 1223 |
| Kahramanmaraş'ta<br>Meydana Gelen<br>Deprem Hk. Basın<br>Bülteni- 26 | AFAD                            | 1 | 1 | 1 | 2: 1242 | 2: 1245 |
| Kahramanmaraş'ta<br>Meydana Gelen<br>Deprem Hk. Basın<br>Bülteni- 26 | AFAD                            | 1 | 1 | 1 | 2: 1242 | 2: 1245 |
| Kahramanmaraş'ta<br>Meydana Gelen<br>Deprem Hk. Basın<br>Bülteni- 26 | Coordination\Information        | 1 | 1 | 1 | 2: 1287 | 2: 1298 |
| Kahramanmaraş'ta<br>Meydana Gelen<br>Deprem Hk. Basın<br>Bülteni- 26 | Coordination\Information        | 1 | 1 | 1 | 2: 1287 | 2: 1298 |
| Kahramanmaraş'ta<br>Meydana Gelen<br>Deprem Hk. Basın<br>Bülteni- 26 | Recovery\Peacemaking            | 1 | 1 | 1 | 2: 1303 | 2: 1312 |
| Kahramanmaraş'ta<br>Meydana Gelen<br>Deprem Hk. Basın<br>Bülteni- 26 | Recovery\Peacemaking            | 1 | 1 | 1 | 2: 1303 | 2: 1312 |
| Kahramanmaraş'ta<br>Meydana Gelen<br>Deprem Hk. Basın<br>Bülteni- 26 | Coordination\Social media       | 1 | 0 | 0 | 2: 1359 | 2: 1370 |
| Kahramanmaraş'ta<br>Meydana Gelen<br>Deprem Hk. Basın<br>Bülteni- 26 | Coordination\Social media usage | 0 | 1 | 0 | 2: 1359 | 2: 1370 |

|                                                                      |               |   |   |   |        |        |
|----------------------------------------------------------------------|---------------|---|---|---|--------|--------|
| Kahramanmaraş'ta<br>Meydana Gelen<br>Deprem Hk. Basın<br>Bülteni- 26 | Kahramanmaraş | 1 | 0 | 0 | 3: 17  | 3: 29  |
| Kahramanmaraş'ta<br>Meydana Gelen<br>Deprem Hk. Basın<br>Bülteni- 26 | Pazarcık      | 0 | 1 | 0 | 3: 17  | 3: 29  |
| Kahramanmaraş'ta<br>Meydana Gelen<br>Deprem Hk. Basın<br>Bülteni- 26 | Earthquake    | 1 | 1 | 1 | 3: 48  | 3: 53  |
| Kahramanmaraş'ta<br>Meydana Gelen<br>Deprem Hk. Basın<br>Bülteni- 26 | Earthquake    | 1 | 1 | 1 | 3: 48  | 3: 53  |
| Kahramanmaraş'ta<br>Meydana Gelen<br>Deprem Hk. Basın<br>Bülteni- 26 | AFAD          | 1 | 1 | 1 | 3: 93  | 3: 96  |
| Kahramanmaraş'ta<br>Meydana Gelen<br>Deprem Hk. Basın<br>Bülteni- 26 | AFAD          | 1 | 1 | 1 | 3: 93  | 3: 96  |
| Kahramanmaraş'ta<br>Meydana Gelen<br>Deprem Hk. Basın<br>Bülteni- 26 | Earthquake    | 1 | 1 | 1 | 3: 135 | 3: 140 |
| Kahramanmaraş'ta<br>Meydana Gelen<br>Deprem Hk. Basın<br>Bülteni- 26 | Earthquake    | 1 | 1 | 1 | 3: 135 | 3: 140 |
| Kahramanmaraş'ta<br>Meydana Gelen<br>Deprem Hk. Basın<br>Bülteni- 26 | Disaster      | 1 | 1 | 1 | 3: 201 | 3: 204 |
| Kahramanmaraş'ta<br>Meydana Gelen<br>Deprem Hk. Basın<br>Bülteni- 26 | Disaster      | 1 | 1 | 1 | 3: 201 | 3: 204 |
| Kahramanmaraş'ta<br>Meydana Gelen<br>Deprem Hk. Basın<br>Bülteni- 26 | Emergency     | 1 | 1 | 1 | 3: 209 | 3: 218 |
| Kahramanmaraş'ta<br>Meydana Gelen<br>Deprem Hk. Basın<br>Bülteni- 26 | Emergency     | 1 | 1 | 1 | 3: 209 | 3: 218 |
| Kahramanmaraş'ta<br>Meydana Gelen<br>Deprem Hk. Basın<br>Bülteni- 28 | Kahramanmaraş | 1 | 0 | 0 | 1: 17  | 1: 29  |
| Kahramanmaraş'ta<br>Meydana Gelen<br>Deprem Hk. Basın<br>Bülteni- 28 | Pazarcık      | 0 | 1 | 0 | 1: 17  | 1: 29  |
| Kahramanmaraş'ta<br>Meydana Gelen<br>Deprem Hk. Basın<br>Bülteni- 28 | Earthquake    | 1 | 1 | 1 | 1: 48  | 1: 53  |
| Kahramanmaraş'ta<br>Meydana Gelen<br>Deprem Hk. Basın<br>Bülteni- 28 | Earthquake    | 1 | 1 | 1 | 1: 48  | 1: 53  |
| Kahramanmaraş'ta<br>Meydana Gelen<br>Deprem Hk. Basın<br>Bülteni- 28 | AFAD          | 1 | 1 | 1 | 1: 93  | 1: 96  |
| Kahramanmaraş'ta<br>Meydana Gelen<br>Deprem Hk. Basın<br>Bülteni- 28 | AFAD          | 1 | 1 | 1 | 1: 93  | 1: 96  |
| Kahramanmaraş'ta<br>Meydana Gelen<br>Deprem Hk. Basın<br>Bülteni- 28 | Earthquake    | 1 | 1 | 1 | 1: 135 | 1: 140 |
| Kahramanmaraş'ta<br>Meydana Gelen<br>Deprem Hk. Basın<br>Bülteni- 28 | Earthquake    | 1 | 1 | 1 | 1: 135 | 1: 140 |

|                                                                      |               |   |   |   |        |        |
|----------------------------------------------------------------------|---------------|---|---|---|--------|--------|
| Kahramanmaraş'ta<br>Meydana Gelen<br>Deprem Hk. Basın<br>Bülteni- 28 | Kahramanmaraş | 1 | 0 | 0 | 1: 156 | 1: 168 |
| Kahramanmaraş'ta<br>Meydana Gelen<br>Deprem Hk. Basın<br>Bülteni- 28 | Pazarcık      | 0 | 1 | 0 | 1: 156 | 1: 168 |
| Kahramanmaraş'ta<br>Meydana Gelen<br>Deprem Hk. Basın<br>Bülteni- 28 | Earthquake    | 1 | 1 | 1 | 1: 187 | 1: 192 |
| Kahramanmaraş'ta<br>Meydana Gelen<br>Deprem Hk. Basın<br>Bülteni- 28 | Earthquake    | 1 | 1 | 1 | 1: 187 | 1: 192 |
| Kahramanmaraş'ta<br>Meydana Gelen<br>Deprem Hk. Basın<br>Bülteni- 28 | Kahramanmaraş | 1 | 0 | 0 | 1: 270 | 1: 282 |
| Kahramanmaraş'ta<br>Meydana Gelen<br>Deprem Hk. Basın<br>Bülteni- 28 | Pazarcık      | 0 | 1 | 0 | 1: 270 | 1: 282 |
| Kahramanmaraş'ta<br>Meydana Gelen<br>Deprem Hk. Basın<br>Bülteni- 28 | Earthquake    | 1 | 1 | 1 | 1: 301 | 1: 306 |
| Kahramanmaraş'ta<br>Meydana Gelen<br>Deprem Hk. Basın<br>Bülteni- 28 | Earthquake    | 1 | 1 | 1 | 1: 301 | 1: 306 |
| Kahramanmaraş'ta<br>Meydana Gelen<br>Deprem Hk. Basın<br>Bülteni- 28 | Kahramanmaraş | 1 | 0 | 0 | 1: 367 | 1: 379 |
| Kahramanmaraş'ta<br>Meydana Gelen<br>Deprem Hk. Basın<br>Bülteni- 28 | Pazarcık      | 0 | 1 | 0 | 1: 367 | 1: 379 |
| Kahramanmaraş'ta<br>Meydana Gelen<br>Deprem Hk. Basın<br>Bülteni- 28 | Earthquake    | 1 | 1 | 1 | 1: 462 | 1: 467 |
| Kahramanmaraş'ta<br>Meydana Gelen<br>Deprem Hk. Basın<br>Bülteni- 28 | Earthquake    | 1 | 1 | 1 | 1: 462 | 1: 467 |
| Kahramanmaraş'ta<br>Meydana Gelen<br>Deprem Hk. Basın<br>Bülteni- 28 | Earthquake    | 1 | 1 | 1 | 1: 489 | 1: 494 |
| Kahramanmaraş'ta<br>Meydana Gelen<br>Deprem Hk. Basın<br>Bülteni- 28 | Earthquake    | 1 | 1 | 1 | 1: 489 | 1: 494 |
| Kahramanmaraş'ta<br>Meydana Gelen<br>Deprem Hk. Basın<br>Bülteni- 28 | Earthquake    | 1 | 1 | 1 | 1: 522 | 1: 527 |
| Kahramanmaraş'ta<br>Meydana Gelen<br>Deprem Hk. Basın<br>Bülteni- 28 | Earthquake    | 1 | 1 | 1 | 1: 522 | 1: 527 |
| Kahramanmaraş'ta<br>Meydana Gelen<br>Deprem Hk. Basın<br>Bülteni- 28 | Kahramanmaraş | 1 | 0 | 0 | 1: 585 | 1: 597 |
| Kahramanmaraş'ta<br>Meydana Gelen<br>Deprem Hk. Basın<br>Bülteni- 28 | Pazarcık      | 0 | 1 | 0 | 1: 585 | 1: 597 |
| Kahramanmaraş'ta<br>Meydana Gelen<br>Deprem Hk. Basın<br>Bülteni- 28 | Disaster      | 1 | 1 | 1 | 1: 807 | 1: 810 |
| Kahramanmaraş'ta<br>Meydana Gelen<br>Deprem Hk. Basın<br>Bülteni- 28 | Disaster      | 1 | 1 | 1 | 1: 807 | 1: 810 |



|                                                                      |                           |   |   |   |         |         |
|----------------------------------------------------------------------|---------------------------|---|---|---|---------|---------|
| Kahramanmaraş'ta<br>Meydana Gelen<br>Deprem Hk. Basın<br>Bülteni- 28 | Shelter&meal\Evacuation   | 1 | 1 | 1 | 1: 840  | 1: 846  |
| Kahramanmaraş'ta<br>Meydana Gelen<br>Deprem Hk. Basın<br>Bülteni- 28 | Shelter&meal\Evacuation   | 1 | 1 | 1 | 1: 840  | 1: 846  |
| Kahramanmaraş'ta<br>Meydana Gelen<br>Deprem Hk. Basın<br>Bülteni- 28 | AFAD                      | 1 | 1 | 1 | 1: 869  | 1: 872  |
| Kahramanmaraş'ta<br>Meydana Gelen<br>Deprem Hk. Basın<br>Bülteni- 28 | AFAD                      | 1 | 1 | 1 | 1: 869  | 1: 872  |
| Kahramanmaraş'ta<br>Meydana Gelen<br>Deprem Hk. Basın<br>Bülteni- 28 | Response\Coast guard&Navy | 1 | 1 | 1 | 1: 898  | 1: 911  |
| Kahramanmaraş'ta<br>Meydana Gelen<br>Deprem Hk. Basın<br>Bülteni- 28 | Response\Coast guard&Navy | 1 | 1 | 1 | 1: 898  | 1: 911  |
| Kahramanmaraş'ta<br>Meydana Gelen<br>Deprem Hk. Basın<br>Bülteni- 28 | Response\Number of staff  | 1 | 0 | 0 | 1: 975  | 1: 997  |
| Kahramanmaraş'ta<br>Meydana Gelen<br>Deprem Hk. Basın<br>Bülteni- 28 | Response\Search&Rescue    | 1 | 1 | 1 | 1: 975  | 1: 988  |
| Kahramanmaraş'ta<br>Meydana Gelen<br>Deprem Hk. Basın<br>Bülteni- 28 | Response\Search&Rescue    | 1 | 1 | 1 | 1: 975  | 1: 988  |
| Kahramanmaraş'ta<br>Meydana Gelen<br>Deprem Hk. Basın<br>Bülteni- 28 | Response\Number           | 0 | 1 | 0 | 1: 975  | 1: 997  |
| Kahramanmaraş'ta<br>Meydana Gelen<br>Deprem Hk. Basın<br>Bülteni- 28 | Response\Number of staff  | 1 | 0 | 0 | 1: 1026 | 1: 1048 |
| Kahramanmaraş'ta<br>Meydana Gelen<br>Deprem Hk. Basın<br>Bülteni- 28 | Response\Search&Rescue    | 1 | 1 | 1 | 1: 1026 | 1: 1039 |
| Kahramanmaraş'ta<br>Meydana Gelen<br>Deprem Hk. Basın<br>Bülteni- 28 | Response\Search&Rescue    | 1 | 1 | 1 | 1: 1026 | 1: 1039 |
| Kahramanmaraş'ta<br>Meydana Gelen<br>Deprem Hk. Basın<br>Bülteni- 28 | Response\Number           | 0 | 1 | 0 | 1: 1026 | 1: 1048 |
| Kahramanmaraş'ta<br>Meydana Gelen<br>Deprem Hk. Basın<br>Bülteni- 28 | Response\Number of staff  | 1 | 0 | 0 | 1: 1149 | 1: 1171 |
| Kahramanmaraş'ta<br>Meydana Gelen<br>Deprem Hk. Basın<br>Bülteni- 28 | Response\Search&Rescue    | 1 | 1 | 1 | 1: 1149 | 1: 1162 |
| Kahramanmaraş'ta<br>Meydana Gelen<br>Deprem Hk. Basın<br>Bülteni- 28 | Response\Search&Rescue    | 1 | 1 | 1 | 1: 1149 | 1: 1162 |
| Kahramanmaraş'ta<br>Meydana Gelen<br>Deprem Hk. Basın<br>Bülteni- 28 | Response\Number           | 0 | 1 | 0 | 1: 1149 | 1: 1171 |
| Kahramanmaraş'ta<br>Meydana Gelen<br>Deprem Hk. Basın<br>Bülteni- 28 | AFAD                      | 1 | 1 | 1 | 1: 1200 | 1: 1203 |
| Kahramanmaraş'ta<br>Meydana Gelen<br>Deprem Hk. Basın<br>Bülteni- 28 | AFAD                      | 1 | 1 | 1 | 1: 1200 | 1: 1203 |

|                                                                      |                           |   |   |   |         |         |
|----------------------------------------------------------------------|---------------------------|---|---|---|---------|---------|
| Kahramanmaraş'ta<br>Meydana Gelen<br>Deprem Hk. Basın<br>Bülteni- 28 | Response\Military         | 1 | 1 | 1 | 1: 1215 | 1: 1222 |
| Kahramanmaraş'ta<br>Meydana Gelen<br>Deprem Hk. Basın<br>Bülteni- 28 | Response\Military         | 1 | 1 | 1 | 1: 1215 | 1: 1222 |
| Kahramanmaraş'ta<br>Meydana Gelen<br>Deprem Hk. Basın<br>Bülteni- 28 | Response\Number of staff  | 1 | 0 | 0 | 1: 1334 | 1: 1348 |
| Kahramanmaraş'ta<br>Meydana Gelen<br>Deprem Hk. Basın<br>Bülteni- 28 | Response\Number           | 0 | 1 | 0 | 1: 1334 | 1: 1348 |
| Kahramanmaraş'ta<br>Meydana Gelen<br>Deprem Hk. Basın<br>Bülteni- 28 | Response\Number of staff  | 1 | 0 | 0 | 1: 1390 | 1: 1404 |
| Kahramanmaraş'ta<br>Meydana Gelen<br>Deprem Hk. Basın<br>Bülteni- 28 | Response\Number           | 0 | 1 | 0 | 1: 1390 | 1: 1404 |
| Kahramanmaraş'ta<br>Meydana Gelen<br>Deprem Hk. Basın<br>Bülteni- 28 | Disaster                  | 1 | 1 | 1 | 1: 1420 | 1: 1423 |
| Kahramanmaraş'ta<br>Meydana Gelen<br>Deprem Hk. Basın<br>Bülteni- 28 | Disaster                  | 1 | 1 | 1 | 1: 1420 | 1: 1423 |
| Kahramanmaraş'ta<br>Meydana Gelen<br>Deprem Hk. Basın<br>Bülteni- 28 | Disaster                  | 1 | 1 | 1 | 1: 1585 | 1: 1588 |
| Kahramanmaraş'ta<br>Meydana Gelen<br>Deprem Hk. Basın<br>Bülteni- 28 | Disaster                  | 1 | 1 | 1 | 1: 1585 | 1: 1588 |
| Kahramanmaraş'ta<br>Meydana Gelen<br>Deprem Hk. Basın<br>Bülteni- 28 | AFAD                      | 1 | 1 | 1 | 1: 1639 | 1: 1642 |
| Kahramanmaraş'ta<br>Meydana Gelen<br>Deprem Hk. Basın<br>Bülteni- 28 | AFAD                      | 1 | 1 | 1 | 1: 1639 | 1: 1642 |
| Kahramanmaraş'ta<br>Meydana Gelen<br>Deprem Hk. Basın<br>Bülteni- 28 | Response\Coast guard&Navy | 1 | 1 | 1 | 1: 1804 | 1: 1819 |
| Kahramanmaraş'ta<br>Meydana Gelen<br>Deprem Hk. Basın<br>Bülteni- 28 | Response\Coast guard&Navy | 1 | 1 | 1 | 1: 1804 | 1: 1819 |
| Kahramanmaraş'ta<br>Meydana Gelen<br>Deprem Hk. Basın<br>Bülteni- 28 | Response\Coast guard&Navy | 1 | 1 | 1 | 1: 1822 | 1: 1835 |
| Kahramanmaraş'ta<br>Meydana Gelen<br>Deprem Hk. Basın<br>Bülteni- 28 | Response\Coast guard&Navy | 1 | 1 | 1 | 1: 1822 | 1: 1835 |
| Kahramanmaraş'ta<br>Meydana Gelen<br>Deprem Hk. Basın<br>Bülteni- 28 | Response\Military         | 1 | 1 | 1 | 1: 1851 | 1: 1858 |
| Kahramanmaraş'ta<br>Meydana Gelen<br>Deprem Hk. Basın<br>Bülteni- 28 | Response\Military         | 1 | 1 | 1 | 1: 1851 | 1: 1858 |
| Kahramanmaraş'ta<br>Meydana Gelen<br>Deprem Hk. Basın<br>Bülteni- 28 | Shelter&meal\Evacuation   | 1 | 1 | 1 | 1: 2064 | 1: 2070 |
| Kahramanmaraş'ta<br>Meydana Gelen<br>Deprem Hk. Basın<br>Bülteni- 28 | Shelter&meal\Evacuation   | 1 | 1 | 1 | 1: 2064 | 1: 2070 |

|                                                                      |                           |   |   |   |         |         |
|----------------------------------------------------------------------|---------------------------|---|---|---|---------|---------|
| Kahramanmaraş'ta<br>Meydana Gelen<br>Deprem Hk. Basın<br>Bülteni- 28 | Response\Coast guard&Navy | 1 | 1 | 1 | 1: 2081 | 1: 2096 |
| Kahramanmaraş'ta<br>Meydana Gelen<br>Deprem Hk. Basın<br>Bülteni- 28 | Response\Coast guard&Navy | 1 | 1 | 1 | 1: 2081 | 1: 2096 |
| Kahramanmaraş'ta<br>Meydana Gelen<br>Deprem Hk. Basın<br>Bülteni- 28 | Response\Coast guard&Navy | 1 | 1 | 1 | 1: 2125 | 1: 2138 |
| Kahramanmaraş'ta<br>Meydana Gelen<br>Deprem Hk. Basın<br>Bülteni- 28 | Response\Coast guard&Navy | 1 | 1 | 1 | 1: 2125 | 1: 2138 |
| Kahramanmaraş'ta<br>Meydana Gelen<br>Deprem Hk. Basın<br>Bülteni- 28 | Disaster                  | 1 | 1 | 1 | 1: 2215 | 1: 2218 |
| Kahramanmaraş'ta<br>Meydana Gelen<br>Deprem Hk. Basın<br>Bülteni- 28 | Disaster                  | 1 | 1 | 1 | 1: 2215 | 1: 2218 |
| Kahramanmaraş'ta<br>Meydana Gelen<br>Deprem Hk. Basın<br>Bülteni- 28 | Shelter&meal\Sheltering   | 1 | 1 | 1 | 1: 2220 | 1: 2226 |
| Kahramanmaraş'ta<br>Meydana Gelen<br>Deprem Hk. Basın<br>Bülteni- 28 | Shelter&meal\Sheltering   | 1 | 1 | 1 | 1: 2220 | 1: 2226 |
| Kahramanmaraş'ta<br>Meydana Gelen<br>Deprem Hk. Basın<br>Bülteni- 28 | Earthquake                | 1 | 1 | 1 | 1: 2235 | 1: 2240 |
| Kahramanmaraş'ta<br>Meydana Gelen<br>Deprem Hk. Basın<br>Bülteni- 28 | Earthquake                | 1 | 1 | 1 | 1: 2235 | 1: 2240 |
| Kahramanmaraş'ta<br>Meydana Gelen<br>Deprem Hk. Basın<br>Bülteni- 28 | AFAD                      | 1 | 1 | 1 | 1: 2281 | 1: 2284 |
| Kahramanmaraş'ta<br>Meydana Gelen<br>Deprem Hk. Basın<br>Bülteni- 28 | AFAD                      | 1 | 1 | 1 | 1: 2281 | 1: 2284 |
| Kahramanmaraş'ta<br>Meydana Gelen<br>Deprem Hk. Basın<br>Bülteni- 28 | Response\Welfare service  | 1 | 1 | 1 | 1: 2295 | 1: 2307 |
| Kahramanmaraş'ta<br>Meydana Gelen<br>Deprem Hk. Basın<br>Bülteni- 28 | Response\Welfare service  | 1 | 1 | 1 | 1: 2295 | 1: 2307 |
| Kahramanmaraş'ta<br>Meydana Gelen<br>Deprem Hk. Basın<br>Bülteni- 28 | Shelter&meal\Tent         | 1 | 1 | 1 | 1: 2381 | 1: 2385 |
| Kahramanmaraş'ta<br>Meydana Gelen<br>Deprem Hk. Basın<br>Bülteni- 28 | Shelter&meal\Tent         | 1 | 1 | 1 | 1: 2381 | 1: 2385 |
| Kahramanmaraş'ta<br>Meydana Gelen<br>Deprem Hk. Basın<br>Bülteni- 28 | Shelter&meal\Tent         | 1 | 1 | 1 | 1: 2446 | 1: 2450 |
| Kahramanmaraş'ta<br>Meydana Gelen<br>Deprem Hk. Basın<br>Bülteni- 28 | Shelter&meal\Tent         | 1 | 1 | 1 | 1: 2446 | 1: 2450 |
| Kahramanmaraş'ta<br>Meydana Gelen<br>Deprem Hk. Basın<br>Bülteni- 28 | Disaster                  | 1 | 1 | 1 | 1: 2482 | 1: 2485 |
| Kahramanmaraş'ta<br>Meydana Gelen<br>Deprem Hk. Basın<br>Bülteni- 28 | Disaster                  | 1 | 1 | 1 | 1: 2482 | 1: 2485 |

|                                                                      |                               |   |   |   |         |         |
|----------------------------------------------------------------------|-------------------------------|---|---|---|---------|---------|
| Kahramanmaraş'ta<br>Meydana Gelen<br>Deprem Hk. Basın<br>Bülteni- 28 | AFAD                          | 1 | 1 | 1 | 1: 2512 | 1: 2515 |
| Kahramanmaraş'ta<br>Meydana Gelen<br>Deprem Hk. Basın<br>Bülteni- 28 | AFAD                          | 1 | 1 | 1 | 1: 2512 | 1: 2515 |
| Kahramanmaraş'ta<br>Meydana Gelen<br>Deprem Hk. Basın<br>Bülteni- 28 | Response\Military             | 1 | 1 | 1 | 1: 2523 | 1: 2530 |
| Kahramanmaraş'ta<br>Meydana Gelen<br>Deprem Hk. Basın<br>Bülteni- 28 | Response\Military             | 1 | 1 | 1 | 1: 2523 | 1: 2530 |
| Kahramanmaraş'ta<br>Meydana Gelen<br>Deprem Hk. Basın<br>Bülteni- 28 | Coordination\NGO              | 1 | 1 | 1 | 1: 2535 | 1: 2546 |
| Kahramanmaraş'ta<br>Meydana Gelen<br>Deprem Hk. Basın<br>Bülteni- 28 | Coordination\NGO              | 1 | 1 | 1 | 1: 2535 | 1: 2546 |
| Kahramanmaraş'ta<br>Meydana Gelen<br>Deprem Hk. Basın<br>Bülteni- 28 | Shelter&meal\Mobile kitchen   | 1 | 1 | 1 | 1: 2627 | 1: 2638 |
| Kahramanmaraş'ta<br>Meydana Gelen<br>Deprem Hk. Basın<br>Bülteni- 28 | Shelter&meal\Mobile kitchen   | 1 | 1 | 1 | 1: 2627 | 1: 2638 |
| Kahramanmaraş'ta<br>Meydana Gelen<br>Deprem Hk. Basın<br>Bülteni- 28 | Shelter&meal\Mobile bakery    | 1 | 1 | 1 | 1: 2661 | 1: 2671 |
| Kahramanmaraş'ta<br>Meydana Gelen<br>Deprem Hk. Basın<br>Bülteni- 28 | Shelter&meal\Mobile bakery    | 1 | 1 | 1 | 1: 2661 | 1: 2671 |
| Kahramanmaraş'ta<br>Meydana Gelen<br>Deprem Hk. Basın<br>Bülteni- 28 | Disaster                      | 1 | 1 | 1 | 1: 2719 | 1: 2722 |
| Kahramanmaraş'ta<br>Meydana Gelen<br>Deprem Hk. Basın<br>Bülteni- 28 | Disaster                      | 1 | 1 | 1 | 1: 2719 | 1: 2722 |
| Kahramanmaraş'ta<br>Meydana Gelen<br>Deprem Hk. Basın<br>Bülteni- 28 | Shelter&meal\Hot meal         | 1 | 1 | 1 | 1: 2745 | 1: 2755 |
| Kahramanmaraş'ta<br>Meydana Gelen<br>Deprem Hk. Basın<br>Bülteni- 28 | Shelter&meal\Hot meal         | 1 | 1 | 1 | 1: 2745 | 1: 2755 |
| Kahramanmaraş'ta<br>Meydana Gelen<br>Deprem Hk. Basın<br>Bülteni- 28 | Disaster                      | 1 | 1 | 1 | 1: 2873 | 1: 2876 |
| Kahramanmaraş'ta<br>Meydana Gelen<br>Deprem Hk. Basın<br>Bülteni- 28 | Disaster                      | 1 | 1 | 1 | 1: 2873 | 1: 2876 |
| Kahramanmaraş'ta<br>Meydana Gelen<br>Deprem Hk. Basın<br>Bülteni- 28 | Response\Psychosocial support | 1 | 1 | 1 | 1: 2878 | 1: 2888 |
| Kahramanmaraş'ta<br>Meydana Gelen<br>Deprem Hk. Basın<br>Bülteni- 28 | Response\Psychosocial support | 1 | 1 | 1 | 1: 2878 | 1: 2888 |
| Kahramanmaraş'ta<br>Meydana Gelen<br>Deprem Hk. Basın<br>Bülteni- 28 | Response\Welfare service      | 1 | 1 | 1 | 1: 2912 | 1: 2924 |
| Kahramanmaraş'ta<br>Meydana Gelen<br>Deprem Hk. Basın<br>Bülteni- 28 | Response\Welfare service      | 1 | 1 | 1 | 1: 2912 | 1: 2924 |

|                                                                      |                               |   |   |   |         |         |
|----------------------------------------------------------------------|-------------------------------|---|---|---|---------|---------|
| Kahramanmaraş'ta<br>Meydana Gelen<br>Deprem Hk. Basın<br>Bülteni- 28 | Kahramanmaraş                 | 1 | 0 | 0 | 1: 2935 | 1: 2947 |
| Kahramanmaraş'ta<br>Meydana Gelen<br>Deprem Hk. Basın<br>Bülteni- 28 | Pazarcık                      | 0 | 1 | 0 | 1: 2935 | 1: 2947 |
| Kahramanmaraş'ta<br>Meydana Gelen<br>Deprem Hk. Basın<br>Bülteni- 28 | Earthquake                    | 1 | 1 | 1 | 1: 3060 | 1: 3065 |
| Kahramanmaraş'ta<br>Meydana Gelen<br>Deprem Hk. Basın<br>Bülteni- 28 | Earthquake                    | 1 | 1 | 1 | 1: 3060 | 1: 3065 |
| Kahramanmaraş'ta<br>Meydana Gelen<br>Deprem Hk. Basın<br>Bülteni- 28 | Earthquake                    | 1 | 1 | 1 | 1: 3086 | 1: 3091 |
| Kahramanmaraş'ta<br>Meydana Gelen<br>Deprem Hk. Basın<br>Bülteni- 28 | Earthquake                    | 1 | 1 | 1 | 1: 3086 | 1: 3091 |
| Kahramanmaraş'ta<br>Meydana Gelen<br>Deprem Hk. Basın<br>Bülteni- 28 | Response\Psychosocial support | 1 | 1 | 1 | 1: 3150 | 1: 3160 |
| Kahramanmaraş'ta<br>Meydana Gelen<br>Deprem Hk. Basın<br>Bülteni- 28 | Response\Psychosocial support | 1 | 1 | 1 | 1: 3150 | 1: 3160 |
| Kahramanmaraş'ta<br>Meydana Gelen<br>Deprem Hk. Basın<br>Bülteni- 28 | Kahramanmaraş                 | 1 | 0 | 0 | 2: 17   | 2: 29   |
| Kahramanmaraş'ta<br>Meydana Gelen<br>Deprem Hk. Basın<br>Bülteni- 28 | Pazarcık                      | 0 | 1 | 0 | 2: 17   | 2: 29   |
| Kahramanmaraş'ta<br>Meydana Gelen<br>Deprem Hk. Basın<br>Bülteni- 28 | Earthquake                    | 1 | 1 | 1 | 2: 48   | 2: 53   |
| Kahramanmaraş'ta<br>Meydana Gelen<br>Deprem Hk. Basın<br>Bülteni- 28 | Earthquake                    | 1 | 1 | 1 | 2: 48   | 2: 53   |
| Kahramanmaraş'ta<br>Meydana Gelen<br>Deprem Hk. Basın<br>Bülteni- 28 | AFAD                          | 1 | 1 | 1 | 2: 93   | 2: 96   |
| Kahramanmaraş'ta<br>Meydana Gelen<br>Deprem Hk. Basın<br>Bülteni- 28 | AFAD                          | 1 | 1 | 1 | 2: 93   | 2: 96   |
| Kahramanmaraş'ta<br>Meydana Gelen<br>Deprem Hk. Basın<br>Bülteni- 28 | Earthquake                    | 1 | 1 | 1 | 2: 135  | 2: 140  |
| Kahramanmaraş'ta<br>Meydana Gelen<br>Deprem Hk. Basın<br>Bülteni- 28 | Earthquake                    | 1 | 1 | 1 | 2: 135  | 2: 140  |
| Kahramanmaraş'ta<br>Meydana Gelen<br>Deprem Hk. Basın<br>Bülteni- 28 | Disaster                      | 1 | 1 | 1 | 2: 280  | 2: 283  |
| Kahramanmaraş'ta<br>Meydana Gelen<br>Deprem Hk. Basın<br>Bülteni- 28 | Disaster                      | 1 | 1 | 1 | 2: 280  | 2: 283  |
| Kahramanmaraş'ta<br>Meydana Gelen<br>Deprem Hk. Basın<br>Bülteni- 28 | Coordination\Public relations | 1 | 1 | 1 | 2: 439  | 2: 444  |
| Kahramanmaraş'ta<br>Meydana Gelen<br>Deprem Hk. Basın<br>Bülteni- 28 | Coordination\Public relations | 1 | 1 | 1 | 2: 439  | 2: 444  |

|                                                                      |                           |   |   |   |         |         |
|----------------------------------------------------------------------|---------------------------|---|---|---|---------|---------|
| Kahramanmaraş'ta<br>Meydana Gelen<br>Deprem Hk. Basın<br>Bülteni- 28 | AFAD                      | 1 | 1 | 1 | 2: 479  | 2: 482  |
| Kahramanmaraş'ta<br>Meydana Gelen<br>Deprem Hk. Basın<br>Bülteni- 28 | AFAD                      | 1 | 1 | 1 | 2: 479  | 2: 482  |
| Kahramanmaraş'ta<br>Meydana Gelen<br>Deprem Hk. Basın<br>Bülteni- 28 | AFAD                      | 1 | 1 | 1 | 2: 537  | 2: 540  |
| Kahramanmaraş'ta<br>Meydana Gelen<br>Deprem Hk. Basın<br>Bülteni- 28 | AFAD                      | 1 | 1 | 1 | 2: 537  | 2: 540  |
| Kahramanmaraş'ta<br>Meydana Gelen<br>Deprem Hk. Basın<br>Bülteni- 28 | AFAD                      | 1 | 1 | 1 | 2: 654  | 2: 657  |
| Kahramanmaraş'ta<br>Meydana Gelen<br>Deprem Hk. Basın<br>Bülteni- 28 | AFAD                      | 1 | 1 | 1 | 2: 654  | 2: 657  |
| Kahramanmaraş'ta<br>Meydana Gelen<br>Deprem Hk. Basın<br>Bülteni- 28 | Response\Search&Rescue    | 1 | 1 | 1 | 2: 748  | 2: 761  |
| Kahramanmaraş'ta<br>Meydana Gelen<br>Deprem Hk. Basın<br>Bülteni- 28 | Response\Search&Rescue    | 1 | 1 | 1 | 2: 748  | 2: 761  |
| Kahramanmaraş'ta<br>Meydana Gelen<br>Deprem Hk. Basın<br>Bülteni- 28 | Disaster                  | 1 | 1 | 1 | 2: 812  | 2: 815  |
| Kahramanmaraş'ta<br>Meydana Gelen<br>Deprem Hk. Basın<br>Bülteni- 28 | Disaster                  | 1 | 1 | 1 | 2: 812  | 2: 815  |
| Kahramanmaraş'ta<br>Meydana Gelen<br>Deprem Hk. Basın<br>Bülteni- 28 | AFAD                      | 1 | 1 | 1 | 2: 830  | 2: 833  |
| Kahramanmaraş'ta<br>Meydana Gelen<br>Deprem Hk. Basın<br>Bülteni- 28 | AFAD                      | 1 | 1 | 1 | 2: 830  | 2: 833  |
| Kahramanmaraş'ta<br>Meydana Gelen<br>Deprem Hk. Basın<br>Bülteni- 28 | Preparedness\Preparedness | 1 | 1 | 1 | 2: 894  | 2: 904  |
| Kahramanmaraş'ta<br>Meydana Gelen<br>Deprem Hk. Basın<br>Bülteni- 28 | Preparedness\Preparedness | 1 | 1 | 1 | 2: 894  | 2: 904  |
| Kahramanmaraş'ta<br>Meydana Gelen<br>Deprem Hk. Basın<br>Bülteni- 28 | Disaster                  | 1 | 1 | 1 | 2: 894  | 2: 897  |
| Kahramanmaraş'ta<br>Meydana Gelen<br>Deprem Hk. Basın<br>Bülteni- 28 | Disaster                  | 1 | 1 | 1 | 2: 894  | 2: 897  |
| Kahramanmaraş'ta<br>Meydana Gelen<br>Deprem Hk. Basın<br>Bülteni- 28 | Disaster                  | 1 | 1 | 1 | 2: 942  | 2: 945  |
| Kahramanmaraş'ta<br>Meydana Gelen<br>Deprem Hk. Basın<br>Bülteni- 28 | Disaster                  | 1 | 1 | 1 | 2: 942  | 2: 945  |
| Kahramanmaraş'ta<br>Meydana Gelen<br>Deprem Hk. Basın<br>Bülteni- 28 | Recovery\Fund drive       | 1 | 1 | 1 | 2: 1003 | 2: 1021 |
| Kahramanmaraş'ta<br>Meydana Gelen<br>Deprem Hk. Basın<br>Bülteni- 28 | Recovery\Fund drive       | 1 | 1 | 1 | 2: 1003 | 2: 1021 |

|                                                                      |                                 |   |   |   |         |         |
|----------------------------------------------------------------------|---------------------------------|---|---|---|---------|---------|
| Kahramanmaraş'ta<br>Meydana Gelen<br>Deprem Hk. Basın<br>Bülteni- 28 | Coordination\Social media       | 1 | 0 | 0 | 2: 1119 | 2: 1130 |
| Kahramanmaraş'ta<br>Meydana Gelen<br>Deprem Hk. Basın<br>Bülteni- 28 | Coordination\Social media usage | 0 | 1 | 0 | 2: 1119 | 2: 1130 |
| Kahramanmaraş'ta<br>Meydana Gelen<br>Deprem Hk. Basın<br>Bülteni- 28 | AFAD                            | 1 | 1 | 1 | 2: 1175 | 2: 1178 |
| Kahramanmaraş'ta<br>Meydana Gelen<br>Deprem Hk. Basın<br>Bülteni- 28 | AFAD                            | 1 | 1 | 1 | 2: 1175 | 2: 1178 |
| Kahramanmaraş'ta<br>Meydana Gelen<br>Deprem Hk. Basın<br>Bülteni- 28 | AFAD                            | 1 | 1 | 1 | 2: 1197 | 2: 1200 |
| Kahramanmaraş'ta<br>Meydana Gelen<br>Deprem Hk. Basın<br>Bülteni- 28 | AFAD                            | 1 | 1 | 1 | 2: 1197 | 2: 1200 |
| Kahramanmaraş'ta<br>Meydana Gelen<br>Deprem Hk. Basın<br>Bülteni- 28 | Coordination\Information        | 1 | 1 | 1 | 2: 1242 | 2: 1253 |
| Kahramanmaraş'ta<br>Meydana Gelen<br>Deprem Hk. Basın<br>Bülteni- 28 | Coordination\Information        | 1 | 1 | 1 | 2: 1242 | 2: 1253 |
| Kahramanmaraş'ta<br>Meydana Gelen<br>Deprem Hk. Basın<br>Bülteni- 28 | Recovery\Peacemaking            | 1 | 1 | 1 | 2: 1258 | 2: 1267 |
| Kahramanmaraş'ta<br>Meydana Gelen<br>Deprem Hk. Basın<br>Bülteni- 28 | Recovery\Peacemaking            | 1 | 1 | 1 | 2: 1258 | 2: 1267 |
| Kahramanmaraş'ta<br>Meydana Gelen<br>Deprem Hk. Basın<br>Bülteni- 28 | Coordination\Social media       | 1 | 0 | 0 | 2: 1314 | 2: 1325 |
| Kahramanmaraş'ta<br>Meydana Gelen<br>Deprem Hk. Basın<br>Bülteni- 28 | Coordination\Social media usage | 0 | 1 | 0 | 2: 1314 | 2: 1325 |
| Kahramanmaraş'ta<br>Meydana Gelen<br>Deprem Hk. Basın<br>Bülteni- 28 | Disaster                        | 1 | 1 | 1 | 2: 1451 | 2: 1454 |
| Kahramanmaraş'ta<br>Meydana Gelen<br>Deprem Hk. Basın<br>Bülteni- 28 | Disaster                        | 1 | 1 | 1 | 2: 1451 | 2: 1454 |
| Kahramanmaraş'ta<br>Meydana Gelen<br>Deprem Hk. Basın<br>Bülteni- 28 | Emergency                       | 1 | 1 | 1 | 2: 1459 | 2: 1468 |
| Kahramanmaraş'ta<br>Meydana Gelen<br>Deprem Hk. Basın<br>Bülteni- 28 | Emergency                       | 1 | 1 | 1 | 2: 1459 | 2: 1468 |
| Kahramanmaraş'ta<br>Meydana Gelen<br>Deprem Hk. Basın<br>Bülteni -31 | Kahramanmaraş                   | 1 | 0 | 0 | 1: 17   | 1: 29   |
| Kahramanmaraş'ta<br>Meydana Gelen<br>Deprem Hk. Basın<br>Bülteni -31 | Pazarcık                        | 0 | 1 | 0 | 1: 17   | 1: 29   |
| Kahramanmaraş'ta<br>Meydana Gelen<br>Deprem Hk. Basın<br>Bülteni -31 | Earthquake                      | 1 | 1 | 1 | 1: 48   | 1: 53   |
| Kahramanmaraş'ta<br>Meydana Gelen<br>Deprem Hk. Basın<br>Bülteni -31 | Earthquake                      | 1 | 1 | 1 | 1: 48   | 1: 53   |

|                                                                      |               |   |   |   |        |        |
|----------------------------------------------------------------------|---------------|---|---|---|--------|--------|
| Kahramanmaraş'ta<br>Meydana Gelen<br>Deprem Hk. Basın<br>Bülteni -31 | AFAD          | 1 | 1 | 1 | 1: 93  | 1: 96  |
| Kahramanmaraş'ta<br>Meydana Gelen<br>Deprem Hk. Basın<br>Bülteni -31 | AFAD          | 1 | 1 | 1 | 1: 93  | 1: 96  |
| Kahramanmaraş'ta<br>Meydana Gelen<br>Deprem Hk. Basın<br>Bülteni -31 | Earthquake    | 1 | 1 | 1 | 1: 135 | 1: 140 |
| Kahramanmaraş'ta<br>Meydana Gelen<br>Deprem Hk. Basın<br>Bülteni -31 | Earthquake    | 1 | 1 | 1 | 1: 135 | 1: 140 |
| Kahramanmaraş'ta<br>Meydana Gelen<br>Deprem Hk. Basın<br>Bülteni -31 | Kahramanmaraş | 1 | 0 | 0 | 1: 171 | 1: 183 |
| Kahramanmaraş'ta<br>Meydana Gelen<br>Deprem Hk. Basın<br>Bülteni -31 | Pazarcık      | 0 | 1 | 0 | 1: 171 | 1: 183 |
| Kahramanmaraş'ta<br>Meydana Gelen<br>Deprem Hk. Basın<br>Bülteni -31 | Earthquake    | 1 | 1 | 1 | 1: 202 | 1: 207 |
| Kahramanmaraş'ta<br>Meydana Gelen<br>Deprem Hk. Basın<br>Bülteni -31 | Earthquake    | 1 | 1 | 1 | 1: 202 | 1: 207 |
| Kahramanmaraş'ta<br>Meydana Gelen<br>Deprem Hk. Basın<br>Bülteni -31 | Kahramanmaraş | 1 | 0 | 0 | 1: 285 | 1: 297 |
| Kahramanmaraş'ta<br>Meydana Gelen<br>Deprem Hk. Basın<br>Bülteni -31 | Pazarcık      | 0 | 1 | 0 | 1: 285 | 1: 297 |
| Kahramanmaraş'ta<br>Meydana Gelen<br>Deprem Hk. Basın<br>Bülteni -31 | Earthquake    | 1 | 1 | 1 | 1: 316 | 1: 321 |
| Kahramanmaraş'ta<br>Meydana Gelen<br>Deprem Hk. Basın<br>Bülteni -31 | Earthquake    | 1 | 1 | 1 | 1: 316 | 1: 321 |
| Kahramanmaraş'ta<br>Meydana Gelen<br>Deprem Hk. Basın<br>Bülteni -31 | Kahramanmaraş | 1 | 0 | 0 | 1: 382 | 1: 394 |
| Kahramanmaraş'ta<br>Meydana Gelen<br>Deprem Hk. Basın<br>Bülteni -31 | Pazarcık      | 0 | 1 | 0 | 1: 382 | 1: 394 |
| Kahramanmaraş'ta<br>Meydana Gelen<br>Deprem Hk. Basın<br>Bülteni -31 | Earthquake    | 1 | 1 | 1 | 1: 476 | 1: 481 |
| Kahramanmaraş'ta<br>Meydana Gelen<br>Deprem Hk. Basın<br>Bülteni -31 | Earthquake    | 1 | 1 | 1 | 1: 476 | 1: 481 |
| Kahramanmaraş'ta<br>Meydana Gelen<br>Deprem Hk. Basın<br>Bülteni -31 | Earthquake    | 1 | 1 | 1 | 1: 503 | 1: 508 |
| Kahramanmaraş'ta<br>Meydana Gelen<br>Deprem Hk. Basın<br>Bülteni -31 | Earthquake    | 1 | 1 | 1 | 1: 503 | 1: 508 |
| Kahramanmaraş'ta<br>Meydana Gelen<br>Deprem Hk. Basın<br>Bülteni -31 | Earthquake    | 1 | 1 | 1 | 1: 536 | 1: 541 |
| Kahramanmaraş'ta<br>Meydana Gelen<br>Deprem Hk. Basın<br>Bülteni -31 | Earthquake    | 1 | 1 | 1 | 1: 536 | 1: 541 |



|                                                                      |                           |   |   |   |         |         |
|----------------------------------------------------------------------|---------------------------|---|---|---|---------|---------|
| Kahramanmaraş'ta<br>Meydana Gelen<br>Deprem Hk. Basın<br>Bülteni -31 | Kahramanmaraş             | 1 | 0 | 0 | 1: 589  | 1: 601  |
| Kahramanmaraş'ta<br>Meydana Gelen<br>Deprem Hk. Basın<br>Bülteni -31 | Pazarcık                  | 0 | 1 | 0 | 1: 589  | 1: 601  |
| Kahramanmaraş'ta<br>Meydana Gelen<br>Deprem Hk. Basın<br>Bülteni -31 | Earthquake                | 1 | 1 | 1 | 1: 824  | 1: 829  |
| Kahramanmaraş'ta<br>Meydana Gelen<br>Deprem Hk. Basın<br>Bülteni -31 | Earthquake                | 1 | 1 | 1 | 1: 824  | 1: 829  |
| Kahramanmaraş'ta<br>Meydana Gelen<br>Deprem Hk. Basın<br>Bülteni -31 | Earthquake                | 1 | 1 | 1 | 1: 851  | 1: 856  |
| Kahramanmaraş'ta<br>Meydana Gelen<br>Deprem Hk. Basın<br>Bülteni -31 | Earthquake                | 1 | 1 | 1 | 1: 851  | 1: 856  |
| Kahramanmaraş'ta<br>Meydana Gelen<br>Deprem Hk. Basın<br>Bülteni -31 | Coordination\Resource     | 1 | 1 | 1 | 1: 858  | 1: 863  |
| Kahramanmaraş'ta<br>Meydana Gelen<br>Deprem Hk. Basın<br>Bülteni -31 | Coordination\Resource     | 1 | 1 | 1 | 1: 858  | 1: 863  |
| Kahramanmaraş'ta<br>Meydana Gelen<br>Deprem Hk. Basın<br>Bülteni -31 | Disaster                  | 1 | 1 | 1 | 1: 914  | 1: 917  |
| Kahramanmaraş'ta<br>Meydana Gelen<br>Deprem Hk. Basın<br>Bülteni -31 | Disaster                  | 1 | 1 | 1 | 1: 914  | 1: 917  |
| Kahramanmaraş'ta<br>Meydana Gelen<br>Deprem Hk. Basın<br>Bülteni -31 | Shelter&meal\Evacuation   | 1 | 1 | 1 | 1: 946  | 1: 952  |
| Kahramanmaraş'ta<br>Meydana Gelen<br>Deprem Hk. Basın<br>Bülteni -31 | Shelter&meal\Evacuation   | 1 | 1 | 1 | 1: 946  | 1: 952  |
| Kahramanmaraş'ta<br>Meydana Gelen<br>Deprem Hk. Basın<br>Bülteni -31 | AFAD                      | 1 | 1 | 1 | 1: 976  | 1: 979  |
| Kahramanmaraş'ta<br>Meydana Gelen<br>Deprem Hk. Basın<br>Bülteni -31 | AFAD                      | 1 | 1 | 1 | 1: 976  | 1: 979  |
| Kahramanmaraş'ta<br>Meydana Gelen<br>Deprem Hk. Basın<br>Bülteni -31 | Response\Coast guard&Navy | 1 | 1 | 1 | 1: 1005 | 1: 1018 |
| Kahramanmaraş'ta<br>Meydana Gelen<br>Deprem Hk. Basın<br>Bülteni -31 | Response\Coast guard&Navy | 1 | 1 | 1 | 1: 1005 | 1: 1018 |
| Kahramanmaraş'ta<br>Meydana Gelen<br>Deprem Hk. Basın<br>Bülteni -31 | Response\Number of staff  | 1 | 0 | 0 | 1: 1082 | 1: 1104 |
| Kahramanmaraş'ta<br>Meydana Gelen<br>Deprem Hk. Basın<br>Bülteni -31 | Response\Search&Rescue    | 1 | 1 | 1 | 1: 1082 | 1: 1095 |
| Kahramanmaraş'ta<br>Meydana Gelen<br>Deprem Hk. Basın<br>Bülteni -31 | Response\Search&Rescue    | 1 | 1 | 1 | 1: 1082 | 1: 1095 |
| Kahramanmaraş'ta<br>Meydana Gelen<br>Deprem Hk. Basın<br>Bülteni -31 | Response\Number           | 0 | 1 | 0 | 1: 1082 | 1: 1104 |

|                                                                      |                          |   |   |   |         |         |
|----------------------------------------------------------------------|--------------------------|---|---|---|---------|---------|
| Kahramanmaraş'ta<br>Meydana Gelen<br>Deprem Hk. Basın<br>Bülteni -31 | Response\Number of staff | 1 | 0 | 0 | 1: 1135 | 1: 1157 |
| Kahramanmaraş'ta<br>Meydana Gelen<br>Deprem Hk. Basın<br>Bülteni -31 | Response\Search&Rescue   | 1 | 1 | 1 | 1: 1135 | 1: 1148 |
| Kahramanmaraş'ta<br>Meydana Gelen<br>Deprem Hk. Basın<br>Bülteni -31 | Response\Search&Rescue   | 1 | 1 | 1 | 1: 1135 | 1: 1148 |
| Kahramanmaraş'ta<br>Meydana Gelen<br>Deprem Hk. Basın<br>Bülteni -31 | Response\Number          | 0 | 1 | 0 | 1: 1135 | 1: 1157 |
| Kahramanmaraş'ta<br>Meydana Gelen<br>Deprem Hk. Basın<br>Bülteni -31 | Response\Number of staff | 1 | 0 | 0 | 1: 1280 | 1: 1302 |
| Kahramanmaraş'ta<br>Meydana Gelen<br>Deprem Hk. Basın<br>Bülteni -31 | Response\Search&Rescue   | 1 | 1 | 1 | 1: 1280 | 1: 1293 |
| Kahramanmaraş'ta<br>Meydana Gelen<br>Deprem Hk. Basın<br>Bülteni -31 | Response\Search&Rescue   | 1 | 1 | 1 | 1: 1280 | 1: 1293 |
| Kahramanmaraş'ta<br>Meydana Gelen<br>Deprem Hk. Basın<br>Bülteni -31 | Response\Number          | 0 | 1 | 0 | 1: 1280 | 1: 1302 |
| Kahramanmaraş'ta<br>Meydana Gelen<br>Deprem Hk. Basın<br>Bülteni -31 | AFAD                     | 1 | 1 | 1 | 1: 1333 | 1: 1336 |
| Kahramanmaraş'ta<br>Meydana Gelen<br>Deprem Hk. Basın<br>Bülteni -31 | AFAD                     | 1 | 1 | 1 | 1: 1333 | 1: 1336 |
| Kahramanmaraş'ta<br>Meydana Gelen<br>Deprem Hk. Basın<br>Bülteni -31 | Response\Military        | 1 | 1 | 1 | 1: 1348 | 1: 1355 |
| Kahramanmaraş'ta<br>Meydana Gelen<br>Deprem Hk. Basın<br>Bülteni -31 | Response\Military        | 1 | 1 | 1 | 1: 1348 | 1: 1355 |
| Kahramanmaraş'ta<br>Meydana Gelen<br>Deprem Hk. Basın<br>Bülteni -31 | Response\Number of staff | 1 | 0 | 0 | 1: 1489 | 1: 1503 |
| Kahramanmaraş'ta<br>Meydana Gelen<br>Deprem Hk. Basın<br>Bülteni -31 | Response\Number          | 0 | 1 | 0 | 1: 1489 | 1: 1503 |
| Kahramanmaraş'ta<br>Meydana Gelen<br>Deprem Hk. Basın<br>Bülteni -31 | Disaster                 | 1 | 1 | 1 | 1: 1575 | 1: 1578 |
| Kahramanmaraş'ta<br>Meydana Gelen<br>Deprem Hk. Basın<br>Bülteni -31 | Disaster                 | 1 | 1 | 1 | 1: 1575 | 1: 1578 |
| Kahramanmaraş'ta<br>Meydana Gelen<br>Deprem Hk. Basın<br>Bülteni -31 | Disaster                 | 1 | 1 | 1 | 1: 1740 | 1: 1743 |
| Kahramanmaraş'ta<br>Meydana Gelen<br>Deprem Hk. Basın<br>Bülteni -31 | Disaster                 | 1 | 1 | 1 | 1: 1740 | 1: 1743 |
| Kahramanmaraş'ta<br>Meydana Gelen<br>Deprem Hk. Basın<br>Bülteni -31 | AFAD                     | 1 | 1 | 1 | 1: 1798 | 1: 1801 |
| Kahramanmaraş'ta<br>Meydana Gelen<br>Deprem Hk. Basın<br>Bülteni -31 | AFAD                     | 1 | 1 | 1 | 1: 1798 | 1: 1801 |

|                                                                      |                           |   |   |   |         |         |
|----------------------------------------------------------------------|---------------------------|---|---|---|---------|---------|
| Kahramanmaraş'ta<br>Meydana Gelen<br>Deprem Hk. Basın<br>Bülteni -31 | Coordination\Coordination | 1 | 1 | 1 | 1: 1894 | 1: 1905 |
| Kahramanmaraş'ta<br>Meydana Gelen<br>Deprem Hk. Basın<br>Bülteni -31 | Coordination\Coordination | 1 | 1 | 1 | 1: 1894 | 1: 1905 |
| Kahramanmaraş'ta<br>Meydana Gelen<br>Deprem Hk. Basın<br>Bülteni -31 | Response\Coast guard&Navy | 1 | 1 | 1 | 1: 2102 | 1: 2117 |
| Kahramanmaraş'ta<br>Meydana Gelen<br>Deprem Hk. Basın<br>Bülteni -31 | Response\Coast guard&Navy | 1 | 1 | 1 | 1: 2102 | 1: 2117 |
| Kahramanmaraş'ta<br>Meydana Gelen<br>Deprem Hk. Basın<br>Bülteni -31 | Response\Military         | 1 | 1 | 1 | 1: 2152 | 1: 2159 |
| Kahramanmaraş'ta<br>Meydana Gelen<br>Deprem Hk. Basın<br>Bülteni -31 | Response\Military         | 1 | 1 | 1 | 1: 2152 | 1: 2159 |
| Kahramanmaraş'ta<br>Meydana Gelen<br>Deprem Hk. Basın<br>Bülteni -31 | Shelter&meal\Evacuation   | 1 | 1 | 1 | 1: 2385 | 1: 2391 |
| Kahramanmaraş'ta<br>Meydana Gelen<br>Deprem Hk. Basın<br>Bülteni -31 | Shelter&meal\Evacuation   | 1 | 1 | 1 | 1: 2385 | 1: 2391 |
| Kahramanmaraş'ta<br>Meydana Gelen<br>Deprem Hk. Basın<br>Bülteni -31 | Response\Coast guard&Navy | 1 | 1 | 1 | 1: 2402 | 1: 2417 |
| Kahramanmaraş'ta<br>Meydana Gelen<br>Deprem Hk. Basın<br>Bülteni -31 | Response\Coast guard&Navy | 1 | 1 | 1 | 1: 2402 | 1: 2417 |
| Kahramanmaraş'ta<br>Meydana Gelen<br>Deprem Hk. Basın<br>Bülteni -31 | Response\Coast guard&Navy | 1 | 1 | 1 | 1: 2446 | 1: 2459 |
| Kahramanmaraş'ta<br>Meydana Gelen<br>Deprem Hk. Basın<br>Bülteni -31 | Response\Coast guard&Navy | 1 | 1 | 1 | 1: 2446 | 1: 2459 |
| Kahramanmaraş'ta<br>Meydana Gelen<br>Deprem Hk. Basın<br>Bülteni -31 | Disaster                  | 1 | 1 | 1 | 1: 2536 | 1: 2539 |
| Kahramanmaraş'ta<br>Meydana Gelen<br>Deprem Hk. Basın<br>Bülteni -31 | Disaster                  | 1 | 1 | 1 | 1: 2536 | 1: 2539 |
| Kahramanmaraş'ta<br>Meydana Gelen<br>Deprem Hk. Basın<br>Bülteni -31 | Shelter&meal\Sheltering   | 1 | 1 | 1 | 1: 2541 | 1: 2547 |
| Kahramanmaraş'ta<br>Meydana Gelen<br>Deprem Hk. Basın<br>Bülteni -31 | Shelter&meal\Sheltering   | 1 | 1 | 1 | 1: 2541 | 1: 2547 |
| Kahramanmaraş'ta<br>Meydana Gelen<br>Deprem Hk. Basın<br>Bülteni -31 | Shelter&meal\Tent         | 1 | 1 | 1 | 1: 2656 | 1: 2660 |
| Kahramanmaraş'ta<br>Meydana Gelen<br>Deprem Hk. Basın<br>Bülteni -31 | Shelter&meal\Tent         | 1 | 1 | 1 | 1: 2656 | 1: 2660 |
| Kahramanmaraş'ta<br>Meydana Gelen<br>Deprem Hk. Basın<br>Bülteni -31 | Shelter&meal\Container    | 1 | 1 | 1 | 1: 2729 | 1: 2737 |
| Kahramanmaraş'ta<br>Meydana Gelen<br>Deprem Hk. Basın<br>Bülteni -31 | Shelter&meal\Container    | 1 | 1 | 1 | 1: 2729 | 1: 2737 |

|                                                                         |                             |   |   |   |         |         |
|-------------------------------------------------------------------------|-----------------------------|---|---|---|---------|---------|
| Kahramanmaraş'ta<br>Meydana Gelen<br>Depremier Hk. Basın<br>Bülteni -31 | Shelter&meal\Sheltering     | 1 | 1 | 1 | 1: 2837 | 1: 2843 |
| Kahramanmaraş'ta<br>Meydana Gelen<br>Depremier Hk. Basın<br>Bülteni -31 | Shelter&meal\Sheltering     | 1 | 1 | 1 | 1: 2837 | 1: 2843 |
| Kahramanmaraş'ta<br>Meydana Gelen<br>Depremier Hk. Basın<br>Bülteni -31 | Shelter&meal\Sheltering     | 1 | 1 | 1 | 1: 2861 | 1: 2867 |
| Kahramanmaraş'ta<br>Meydana Gelen<br>Depremier Hk. Basın<br>Bülteni -31 | Shelter&meal\Sheltering     | 1 | 1 | 1 | 1: 2861 | 1: 2867 |
| Kahramanmaraş'ta<br>Meydana Gelen<br>Depremier Hk. Basın<br>Bülteni -31 | Disaster                    | 1 | 1 | 1 | 1: 2894 | 1: 2897 |
| Kahramanmaraş'ta<br>Meydana Gelen<br>Depremier Hk. Basın<br>Bülteni -31 | Disaster                    | 1 | 1 | 1 | 1: 2894 | 1: 2897 |
| Kahramanmaraş'ta<br>Meydana Gelen<br>Depremier Hk. Basın<br>Bülteni -31 | AFAD                        | 1 | 1 | 1 | 1: 2924 | 1: 2927 |
| Kahramanmaraş'ta<br>Meydana Gelen<br>Depremier Hk. Basın<br>Bülteni -31 | AFAD                        | 1 | 1 | 1 | 1: 2924 | 1: 2927 |
| Kahramanmaraş'ta<br>Meydana Gelen<br>Depremier Hk. Basın<br>Bülteni -31 | Response\Military           | 1 | 1 | 1 | 1: 2935 | 1: 2942 |
| Kahramanmaraş'ta<br>Meydana Gelen<br>Depremier Hk. Basın<br>Bülteni -31 | Response\Military           | 1 | 1 | 1 | 1: 2935 | 1: 2942 |
| Kahramanmaraş'ta<br>Meydana Gelen<br>Depremier Hk. Basın<br>Bülteni -31 | Coordination\NGO            | 1 | 1 | 1 | 1: 2947 | 1: 2958 |
| Kahramanmaraş'ta<br>Meydana Gelen<br>Depremier Hk. Basın<br>Bülteni -31 | Coordination\NGO            | 1 | 1 | 1 | 1: 2947 | 1: 2958 |
| Kahramanmaraş'ta<br>Meydana Gelen<br>Depremier Hk. Basın<br>Bülteni -31 | Shelter&meal\Mobile kitchen | 1 | 1 | 1 | 1: 3038 | 1: 3049 |
| Kahramanmaraş'ta<br>Meydana Gelen<br>Depremier Hk. Basın<br>Bülteni -31 | Shelter&meal\Mobile kitchen | 1 | 1 | 1 | 1: 3038 | 1: 3049 |
| Kahramanmaraş'ta<br>Meydana Gelen<br>Depremier Hk. Basın<br>Bülteni -31 | Disaster                    | 1 | 1 | 1 | 1: 3208 | 1: 3211 |
| Kahramanmaraş'ta<br>Meydana Gelen<br>Depremier Hk. Basın<br>Bülteni -31 | Disaster                    | 1 | 1 | 1 | 1: 3208 | 1: 3211 |
| Kahramanmaraş'ta<br>Meydana Gelen<br>Depremier Hk. Basın<br>Bülteni -31 | Shelter&meal\Hot meal       | 1 | 1 | 1 | 1: 3235 | 1: 3245 |
| Kahramanmaraş'ta<br>Meydana Gelen<br>Depremier Hk. Basın<br>Bülteni -31 | Shelter&meal\Hot meal       | 1 | 1 | 1 | 1: 3235 | 1: 3245 |
| Kahramanmaraş'ta<br>Meydana Gelen<br>Depremier Hk. Basın<br>Bülteni -31 | Disaster                    | 1 | 1 | 1 | 1: 3368 | 1: 3371 |
| Kahramanmaraş'ta<br>Meydana Gelen<br>Depremier Hk. Basın<br>Bülteni -31 | Disaster                    | 1 | 1 | 1 | 1: 3368 | 1: 3371 |

|                                                                      |                               |   |   |   |         |         |
|----------------------------------------------------------------------|-------------------------------|---|---|---|---------|---------|
| Kahramanmaraş'ta<br>Meydana Gelen<br>Deprem Hk. Basın<br>Bülteni -31 | Response\Psychosocial support | 1 | 1 | 1 | 1: 3373 | 1: 3383 |
| Kahramanmaraş'ta<br>Meydana Gelen<br>Deprem Hk. Basın<br>Bülteni -31 | Response\Psychosocial support | 1 | 1 | 1 | 1: 3373 | 1: 3383 |
| Kahramanmaraş'ta<br>Meydana Gelen<br>Deprem Hk. Basın<br>Bülteni -31 | Response\Welfare service      | 1 | 1 | 1 | 1: 3407 | 1: 3419 |
| Kahramanmaraş'ta<br>Meydana Gelen<br>Deprem Hk. Basın<br>Bülteni -31 | Response\Welfare service      | 1 | 1 | 1 | 1: 3407 | 1: 3419 |
| Kahramanmaraş'ta<br>Meydana Gelen<br>Deprem Hk. Basın<br>Bülteni -31 | Kahramanmaraş                 | 1 | 0 | 0 | 1: 3430 | 1: 3442 |
| Kahramanmaraş'ta<br>Meydana Gelen<br>Deprem Hk. Basın<br>Bülteni -31 | Pazarcık                      | 0 | 1 | 0 | 1: 3430 | 1: 3442 |
| Kahramanmaraş'ta<br>Meydana Gelen<br>Deprem Hk. Basın<br>Bülteni -31 | Earthquake                    | 1 | 1 | 1 | 1: 3505 | 1: 3510 |
| Kahramanmaraş'ta<br>Meydana Gelen<br>Deprem Hk. Basın<br>Bülteni -31 | Earthquake                    | 1 | 1 | 1 | 1: 3505 | 1: 3510 |
| Kahramanmaraş'ta<br>Meydana Gelen<br>Deprem Hk. Basın<br>Bülteni -31 | Response\Number of staff      | 1 | 0 | 0 | 1: 3535 | 1: 3549 |
| Kahramanmaraş'ta<br>Meydana Gelen<br>Deprem Hk. Basın<br>Bülteni -31 | Response\Number               | 0 | 1 | 0 | 1: 3535 | 1: 3549 |
| Kahramanmaraş'ta<br>Meydana Gelen<br>Deprem Hk. Basın<br>Bülteni -31 | Earthquake                    | 1 | 1 | 1 | 1: 3558 | 1: 3563 |
| Kahramanmaraş'ta<br>Meydana Gelen<br>Deprem Hk. Basın<br>Bülteni -31 | Earthquake                    | 1 | 1 | 1 | 1: 3558 | 1: 3563 |
| Kahramanmaraş'ta<br>Meydana Gelen<br>Deprem Hk. Basın<br>Bülteni -31 | Earthquake                    | 1 | 1 | 1 | 1: 3627 | 1: 3632 |
| Kahramanmaraş'ta<br>Meydana Gelen<br>Deprem Hk. Basın<br>Bülteni -31 | Earthquake                    | 1 | 1 | 1 | 1: 3627 | 1: 3632 |
| Kahramanmaraş'ta<br>Meydana Gelen<br>Deprem Hk. Basın<br>Bülteni -31 | Earthquake                    | 1 | 1 | 1 | 1: 3654 | 1: 3659 |
| Kahramanmaraş'ta<br>Meydana Gelen<br>Deprem Hk. Basın<br>Bülteni -31 | Earthquake                    | 1 | 1 | 1 | 1: 3654 | 1: 3659 |
| Kahramanmaraş'ta<br>Meydana Gelen<br>Deprem Hk. Basın<br>Bülteni -31 | Response\Psychosocial support | 1 | 1 | 1 | 1: 3720 | 1: 3730 |
| Kahramanmaraş'ta<br>Meydana Gelen<br>Deprem Hk. Basın<br>Bülteni -31 | Response\Psychosocial support | 1 | 1 | 1 | 1: 3720 | 1: 3730 |
| Kahramanmaraş'ta<br>Meydana Gelen<br>Deprem Hk. Basın<br>Bülteni -31 | Kahramanmaraş                 | 1 | 0 | 0 | 2: 17   | 2: 29   |
| Kahramanmaraş'ta<br>Meydana Gelen<br>Deprem Hk. Basın<br>Bülteni -31 | Pazarcık                      | 0 | 1 | 0 | 2: 17   | 2: 29   |

|                                                                      |                               |   |   |   |        |        |
|----------------------------------------------------------------------|-------------------------------|---|---|---|--------|--------|
| Kahramanmaraş'ta<br>Meydana Gelen<br>Deprem Hk. Basın<br>Bülteni -31 | Earthquake                    | 1 | 1 | 1 | 2: 48  | 2: 53  |
| Kahramanmaraş'ta<br>Meydana Gelen<br>Deprem Hk. Basın<br>Bülteni -31 | Earthquake                    | 1 | 1 | 1 | 2: 48  | 2: 53  |
| Kahramanmaraş'ta<br>Meydana Gelen<br>Deprem Hk. Basın<br>Bülteni -31 | AFAD                          | 1 | 1 | 1 | 2: 93  | 2: 96  |
| Kahramanmaraş'ta<br>Meydana Gelen<br>Deprem Hk. Basın<br>Bülteni -31 | AFAD                          | 1 | 1 | 1 | 2: 93  | 2: 96  |
| Kahramanmaraş'ta<br>Meydana Gelen<br>Deprem Hk. Basın<br>Bülteni -31 | Earthquake                    | 1 | 1 | 1 | 2: 135 | 2: 140 |
| Kahramanmaraş'ta<br>Meydana Gelen<br>Deprem Hk. Basın<br>Bülteni -31 | Earthquake                    | 1 | 1 | 1 | 2: 135 | 2: 140 |
| Kahramanmaraş'ta<br>Meydana Gelen<br>Deprem Hk. Basın<br>Bülteni -31 | Disaster                      | 1 | 1 | 1 | 2: 227 | 2: 230 |
| Kahramanmaraş'ta<br>Meydana Gelen<br>Deprem Hk. Basın<br>Bülteni -31 | Disaster                      | 1 | 1 | 1 | 2: 227 | 2: 230 |
| Kahramanmaraş'ta<br>Meydana Gelen<br>Deprem Hk. Basın<br>Bülteni -31 | Coordination\Public relations | 1 | 1 | 1 | 2: 276 | 2: 281 |
| Kahramanmaraş'ta<br>Meydana Gelen<br>Deprem Hk. Basın<br>Bülteni -31 | Coordination\Public relations | 1 | 1 | 1 | 2: 276 | 2: 281 |
| Kahramanmaraş'ta<br>Meydana Gelen<br>Deprem Hk. Basın<br>Bülteni -31 | AFAD                          | 1 | 1 | 1 | 2: 316 | 2: 319 |
| Kahramanmaraş'ta<br>Meydana Gelen<br>Deprem Hk. Basın<br>Bülteni -31 | AFAD                          | 1 | 1 | 1 | 2: 316 | 2: 319 |
| Kahramanmaraş'ta<br>Meydana Gelen<br>Deprem Hk. Basın<br>Bülteni -31 | AFAD                          | 1 | 1 | 1 | 2: 374 | 2: 377 |
| Kahramanmaraş'ta<br>Meydana Gelen<br>Deprem Hk. Basın<br>Bülteni -31 | AFAD                          | 1 | 1 | 1 | 2: 374 | 2: 377 |
| Kahramanmaraş'ta<br>Meydana Gelen<br>Deprem Hk. Basın<br>Bülteni -31 | AFAD                          | 1 | 1 | 1 | 2: 491 | 2: 494 |
| Kahramanmaraş'ta<br>Meydana Gelen<br>Deprem Hk. Basın<br>Bülteni -31 | AFAD                          | 1 | 1 | 1 | 2: 491 | 2: 494 |
| Kahramanmaraş'ta<br>Meydana Gelen<br>Deprem Hk. Basın<br>Bülteni -31 | Response\Search&Rescue        | 1 | 1 | 1 | 2: 585 | 2: 598 |
| Kahramanmaraş'ta<br>Meydana Gelen<br>Deprem Hk. Basın<br>Bülteni -31 | Response\Search&Rescue        | 1 | 1 | 1 | 2: 585 | 2: 598 |
| Kahramanmaraş'ta<br>Meydana Gelen<br>Deprem Hk. Basın<br>Bülteni -31 | Disaster                      | 1 | 1 | 1 | 2: 649 | 2: 652 |
| Kahramanmaraş'ta<br>Meydana Gelen<br>Deprem Hk. Basın<br>Bülteni -31 | Disaster                      | 1 | 1 | 1 | 2: 649 | 2: 652 |

|                                                                      |                                 |   |   |   |         |         |
|----------------------------------------------------------------------|---------------------------------|---|---|---|---------|---------|
| Kahramanmaraş'ta<br>Meydana Gelen<br>Deprem Hk. Basın<br>Bülteni -31 | AFAD                            | 1 | 1 | 1 | 2: 667  | 2: 670  |
| Kahramanmaraş'ta<br>Meydana Gelen<br>Deprem Hk. Basın<br>Bülteni -31 | AFAD                            | 1 | 1 | 1 | 2: 667  | 2: 670  |
| Kahramanmaraş'ta<br>Meydana Gelen<br>Deprem Hk. Basın<br>Bülteni -31 | Preparedness\Preparedness       | 1 | 1 | 1 | 2: 731  | 2: 741  |
| Kahramanmaraş'ta<br>Meydana Gelen<br>Deprem Hk. Basın<br>Bülteni -31 | Preparedness\Preparedness       | 1 | 1 | 1 | 2: 731  | 2: 741  |
| Kahramanmaraş'ta<br>Meydana Gelen<br>Deprem Hk. Basın<br>Bülteni -31 | Disaster                        | 1 | 1 | 1 | 2: 731  | 2: 734  |
| Kahramanmaraş'ta<br>Meydana Gelen<br>Deprem Hk. Basın<br>Bülteni -31 | Disaster                        | 1 | 1 | 1 | 2: 731  | 2: 734  |
| Kahramanmaraş'ta<br>Meydana Gelen<br>Deprem Hk. Basın<br>Bülteni -31 | Disaster                        | 1 | 1 | 1 | 2: 779  | 2: 782  |
| Kahramanmaraş'ta<br>Meydana Gelen<br>Deprem Hk. Basın<br>Bülteni -31 | Disaster                        | 1 | 1 | 1 | 2: 779  | 2: 782  |
| Kahramanmaraş'ta<br>Meydana Gelen<br>Deprem Hk. Basın<br>Bülteni -31 | Recovery\Fund drive             | 1 | 1 | 1 | 2: 840  | 2: 858  |
| Kahramanmaraş'ta<br>Meydana Gelen<br>Deprem Hk. Basın<br>Bülteni -31 | Recovery\Fund drive             | 1 | 1 | 1 | 2: 840  | 2: 858  |
| Kahramanmaraş'ta<br>Meydana Gelen<br>Deprem Hk. Basın<br>Bülteni -31 | Coordination\Social media       | 1 | 0 | 0 | 2: 956  | 2: 967  |
| Kahramanmaraş'ta<br>Meydana Gelen<br>Deprem Hk. Basın<br>Bülteni -31 | Coordination\Social media usage | 0 | 1 | 0 | 2: 956  | 2: 967  |
| Kahramanmaraş'ta<br>Meydana Gelen<br>Deprem Hk. Basın<br>Bülteni -31 | AFAD                            | 1 | 1 | 1 | 2: 1012 | 2: 1015 |
| Kahramanmaraş'ta<br>Meydana Gelen<br>Deprem Hk. Basın<br>Bülteni -31 | AFAD                            | 1 | 1 | 1 | 2: 1012 | 2: 1015 |
| Kahramanmaraş'ta<br>Meydana Gelen<br>Deprem Hk. Basın<br>Bülteni -31 | AFAD                            | 1 | 1 | 1 | 2: 1034 | 2: 1037 |
| Kahramanmaraş'ta<br>Meydana Gelen<br>Deprem Hk. Basın<br>Bülteni -31 | AFAD                            | 1 | 1 | 1 | 2: 1034 | 2: 1037 |
| Kahramanmaraş'ta<br>Meydana Gelen<br>Deprem Hk. Basın<br>Bülteni -31 | Coordination\Information        | 1 | 1 | 1 | 2: 1079 | 2: 1090 |
| Kahramanmaraş'ta<br>Meydana Gelen<br>Deprem Hk. Basın<br>Bülteni -31 | Coordination\Information        | 1 | 1 | 1 | 2: 1079 | 2: 1090 |
| Kahramanmaraş'ta<br>Meydana Gelen<br>Deprem Hk. Basın<br>Bülteni -31 | Recovery\Peacemaking            | 1 | 1 | 1 | 2: 1095 | 2: 1104 |
| Kahramanmaraş'ta<br>Meydana Gelen<br>Deprem Hk. Basın<br>Bülteni -31 | Recovery\Peacemaking            | 1 | 1 | 1 | 2: 1095 | 2: 1104 |

|                                                                      |                                 |   |   |   |         |         |
|----------------------------------------------------------------------|---------------------------------|---|---|---|---------|---------|
| Kahramanmaraş'ta<br>Meydana Gelen<br>Deprem Hk. Basın<br>Bülteni -31 | Coordination\Social media       | 1 | 0 | 0 | 2: 1151 | 2: 1162 |
| Kahramanmaraş'ta<br>Meydana Gelen<br>Deprem Hk. Basın<br>Bülteni -31 | Coordination\Social media usage | 0 | 1 | 0 | 2: 1151 | 2: 1162 |
| Kahramanmaraş'ta<br>Meydana Gelen<br>Deprem Hk. Basın<br>Bülteni -31 | Kahramanmaraş                   | 1 | 0 | 0 | 3: 17   | 3: 29   |
| Kahramanmaraş'ta<br>Meydana Gelen<br>Deprem Hk. Basın<br>Bülteni -31 | Pazarcık                        | 0 | 1 | 0 | 3: 17   | 3: 29   |
| Kahramanmaraş'ta<br>Meydana Gelen<br>Deprem Hk. Basın<br>Bülteni -31 | Earthquake                      | 1 | 1 | 1 | 3: 48   | 3: 53   |
| Kahramanmaraş'ta<br>Meydana Gelen<br>Deprem Hk. Basın<br>Bülteni -31 | Earthquake                      | 1 | 1 | 1 | 3: 48   | 3: 53   |
| Kahramanmaraş'ta<br>Meydana Gelen<br>Deprem Hk. Basın<br>Bülteni -31 | AFAD                            | 1 | 1 | 1 | 3: 93   | 3: 96   |
| Kahramanmaraş'ta<br>Meydana Gelen<br>Deprem Hk. Basın<br>Bülteni -31 | AFAD                            | 1 | 1 | 1 | 3: 93   | 3: 96   |
| Kahramanmaraş'ta<br>Meydana Gelen<br>Deprem Hk. Basın<br>Bülteni -31 | Earthquake                      | 1 | 1 | 1 | 3: 135  | 3: 140  |
| Kahramanmaraş'ta<br>Meydana Gelen<br>Deprem Hk. Basın<br>Bülteni -31 | Earthquake                      | 1 | 1 | 1 | 3: 135  | 3: 140  |
| Kahramanmaraş'ta<br>Meydana Gelen<br>Deprem Hk. Basın<br>Bülteni -31 | Disaster                        | 1 | 1 | 1 | 3: 202  | 3: 205  |
| Kahramanmaraş'ta<br>Meydana Gelen<br>Deprem Hk. Basın<br>Bülteni -31 | Disaster                        | 1 | 1 | 1 | 3: 202  | 3: 205  |
| Kahramanmaraş'ta<br>Meydana Gelen<br>Deprem Hk. Basın<br>Bülteni -31 | Emergency                       | 1 | 1 | 1 | 3: 210  | 3: 219  |
| Kahramanmaraş'ta<br>Meydana Gelen<br>Deprem Hk. Basın<br>Bülteni -31 | Emergency                       | 1 | 1 | 1 | 3: 210  | 3: 219  |
| Kahramanmaraş'ta<br>Meydana Gelen<br>Deprem Hk. Basın<br>Bülteni-23  | Kahramanmaraş                   | 1 | 0 | 0 | 1: 17   | 1: 29   |
| Kahramanmaraş'ta<br>Meydana Gelen<br>Deprem Hk. Basın<br>Bülteni-23  | Pazarcık                        | 0 | 1 | 0 | 1: 17   | 1: 29   |
| Kahramanmaraş'ta<br>Meydana Gelen<br>Deprem Hk. Basın<br>Bülteni-23  | Earthquake                      | 1 | 1 | 1 | 1: 48   | 1: 53   |
| Kahramanmaraş'ta<br>Meydana Gelen<br>Deprem Hk. Basın<br>Bülteni-23  | Earthquake                      | 1 | 1 | 1 | 1: 48   | 1: 53   |
| Kahramanmaraş'ta<br>Meydana Gelen<br>Deprem Hk. Basın<br>Bülteni-23  | AFAD                            | 1 | 1 | 1 | 1: 92   | 1: 95   |
| Kahramanmaraş'ta<br>Meydana Gelen<br>Deprem Hk. Basın<br>Bülteni-23  | AFAD                            | 1 | 1 | 1 | 1: 92   | 1: 95   |



|                                                                     |               |   |   |   |        |        |
|---------------------------------------------------------------------|---------------|---|---|---|--------|--------|
| Kahramanmaraş'ta<br>Meydana Gelen<br>Deprem Hk. Basın<br>Bülteni-23 | Earthquake    | 1 | 1 | 1 | 1: 134 | 1: 139 |
| Kahramanmaraş'ta<br>Meydana Gelen<br>Deprem Hk. Basın<br>Bülteni-23 | Earthquake    | 1 | 1 | 1 | 1: 134 | 1: 139 |
| Kahramanmaraş'ta<br>Meydana Gelen<br>Deprem Hk. Basın<br>Bülteni-23 | Kahramanmaraş | 1 | 0 | 0 | 1: 168 | 1: 180 |
| Kahramanmaraş'ta<br>Meydana Gelen<br>Deprem Hk. Basın<br>Bülteni-23 | Pazarcık      | 0 | 1 | 0 | 1: 168 | 1: 180 |
| Kahramanmaraş'ta<br>Meydana Gelen<br>Deprem Hk. Basın<br>Bülteni-23 | Earthquake    | 1 | 1 | 1 | 1: 199 | 1: 204 |
| Kahramanmaraş'ta<br>Meydana Gelen<br>Deprem Hk. Basın<br>Bülteni-23 | Earthquake    | 1 | 1 | 1 | 1: 199 | 1: 204 |
| Kahramanmaraş'ta<br>Meydana Gelen<br>Deprem Hk. Basın<br>Bülteni-23 | Kahramanmaraş | 1 | 0 | 0 | 1: 281 | 1: 293 |
| Kahramanmaraş'ta<br>Meydana Gelen<br>Deprem Hk. Basın<br>Bülteni-23 | Pazarcık      | 0 | 1 | 0 | 1: 281 | 1: 293 |
| Kahramanmaraş'ta<br>Meydana Gelen<br>Deprem Hk. Basın<br>Bülteni-23 | Earthquake    | 1 | 1 | 1 | 1: 312 | 1: 317 |
| Kahramanmaraş'ta<br>Meydana Gelen<br>Deprem Hk. Basın<br>Bülteni-23 | Earthquake    | 1 | 1 | 1 | 1: 312 | 1: 317 |
| Kahramanmaraş'ta<br>Meydana Gelen<br>Deprem Hk. Basın<br>Bülteni-23 | Kahramanmaraş | 1 | 0 | 0 | 1: 378 | 1: 390 |
| Kahramanmaraş'ta<br>Meydana Gelen<br>Deprem Hk. Basın<br>Bülteni-23 | Pazarcık      | 0 | 1 | 0 | 1: 378 | 1: 390 |
| Kahramanmaraş'ta<br>Meydana Gelen<br>Deprem Hk. Basın<br>Bülteni-23 | Earthquake    | 1 | 1 | 1 | 1: 473 | 1: 478 |
| Kahramanmaraş'ta<br>Meydana Gelen<br>Deprem Hk. Basın<br>Bülteni-23 | Earthquake    | 1 | 1 | 1 | 1: 473 | 1: 478 |
| Kahramanmaraş'ta<br>Meydana Gelen<br>Deprem Hk. Basın<br>Bülteni-23 | Earthquake    | 1 | 1 | 1 | 1: 500 | 1: 505 |
| Kahramanmaraş'ta<br>Meydana Gelen<br>Deprem Hk. Basın<br>Bülteni-23 | Earthquake    | 1 | 1 | 1 | 1: 500 | 1: 505 |
| Kahramanmaraş'ta<br>Meydana Gelen<br>Deprem Hk. Basın<br>Bülteni-23 | Earthquake    | 1 | 1 | 1 | 1: 533 | 1: 538 |
| Kahramanmaraş'ta<br>Meydana Gelen<br>Deprem Hk. Basın<br>Bülteni-23 | Earthquake    | 1 | 1 | 1 | 1: 533 | 1: 538 |
| Kahramanmaraş'ta<br>Meydana Gelen<br>Deprem Hk. Basın<br>Bülteni-23 | Kahramanmaraş | 1 | 0 | 0 | 1: 596 | 1: 608 |
| Kahramanmaraş'ta<br>Meydana Gelen<br>Deprem Hk. Basın<br>Bülteni-23 | Pazarcık      | 0 | 1 | 0 | 1: 596 | 1: 608 |

|                                                                     |                           |   |   |   |         |         |
|---------------------------------------------------------------------|---------------------------|---|---|---|---------|---------|
| Kahramanmaraş'ta<br>Meydana Gelen<br>Deprem Hk. Basın<br>Bülteni-23 | Disaster                  | 1 | 1 | 1 | 1: 804  | 1: 807  |
| Kahramanmaraş'ta<br>Meydana Gelen<br>Deprem Hk. Basın<br>Bülteni-23 | Disaster                  | 1 | 1 | 1 | 1: 804  | 1: 807  |
| Kahramanmaraş'ta<br>Meydana Gelen<br>Deprem Hk. Basın<br>Bülteni-23 | Shelter&meal\Evacuation   | 1 | 1 | 1 | 1: 836  | 1: 842  |
| Kahramanmaraş'ta<br>Meydana Gelen<br>Deprem Hk. Basın<br>Bülteni-23 | Shelter&meal\Evacuation   | 1 | 1 | 1 | 1: 836  | 1: 842  |
| Kahramanmaraş'ta<br>Meydana Gelen<br>Deprem Hk. Basın<br>Bülteni-23 | AFAD                      | 1 | 1 | 1 | 1: 866  | 1: 869  |
| Kahramanmaraş'ta<br>Meydana Gelen<br>Deprem Hk. Basın<br>Bülteni-23 | AFAD                      | 1 | 1 | 1 | 1: 866  | 1: 869  |
| Kahramanmaraş'ta<br>Meydana Gelen<br>Deprem Hk. Basın<br>Bülteni-23 | Response\Coast guard&Navy | 1 | 1 | 1 | 1: 895  | 1: 908  |
| Kahramanmaraş'ta<br>Meydana Gelen<br>Deprem Hk. Basın<br>Bülteni-23 | Response\Coast guard&Navy | 1 | 1 | 1 | 1: 895  | 1: 908  |
| Kahramanmaraş'ta<br>Meydana Gelen<br>Deprem Hk. Basın<br>Bülteni-23 | Response\Number of staff  | 1 | 0 | 0 | 1: 972  | 1: 994  |
| Kahramanmaraş'ta<br>Meydana Gelen<br>Deprem Hk. Basın<br>Bülteni-23 | Response\Search&Rescue    | 1 | 1 | 1 | 1: 972  | 1: 985  |
| Kahramanmaraş'ta<br>Meydana Gelen<br>Deprem Hk. Basın<br>Bülteni-23 | Response\Search&Rescue    | 1 | 1 | 1 | 1: 972  | 1: 985  |
| Kahramanmaraş'ta<br>Meydana Gelen<br>Deprem Hk. Basın<br>Bülteni-23 | Response\Number           | 0 | 1 | 0 | 1: 972  | 1: 994  |
| Kahramanmaraş'ta<br>Meydana Gelen<br>Deprem Hk. Basın<br>Bülteni-23 | Response\Number of staff  | 1 | 0 | 0 | 1: 1023 | 1: 1045 |
| Kahramanmaraş'ta<br>Meydana Gelen<br>Deprem Hk. Basın<br>Bülteni-23 | Response\Search&Rescue    | 1 | 1 | 1 | 1: 1023 | 1: 1036 |
| Kahramanmaraş'ta<br>Meydana Gelen<br>Deprem Hk. Basın<br>Bülteni-23 | Response\Search&Rescue    | 1 | 1 | 1 | 1: 1023 | 1: 1036 |
| Kahramanmaraş'ta<br>Meydana Gelen<br>Deprem Hk. Basın<br>Bülteni-23 | Response\Number           | 0 | 1 | 0 | 1: 1023 | 1: 1045 |
| Kahramanmaraş'ta<br>Meydana Gelen<br>Deprem Hk. Basın<br>Bülteni-23 | Response\Number of staff  | 1 | 0 | 0 | 1: 1146 | 1: 1168 |
| Kahramanmaraş'ta<br>Meydana Gelen<br>Deprem Hk. Basın<br>Bülteni-23 | Response\Search&Rescue    | 1 | 1 | 1 | 1: 1146 | 1: 1159 |
| Kahramanmaraş'ta<br>Meydana Gelen<br>Deprem Hk. Basın<br>Bülteni-23 | Response\Search&Rescue    | 1 | 1 | 1 | 1: 1146 | 1: 1159 |
| Kahramanmaraş'ta<br>Meydana Gelen<br>Deprem Hk. Basın<br>Bülteni-23 | Response\Number           | 0 | 1 | 0 | 1: 1146 | 1: 1168 |

|                                                                     |                           |   |   |   |         |         |
|---------------------------------------------------------------------|---------------------------|---|---|---|---------|---------|
| Kahramanmaraş'ta<br>Meydana Gelen<br>Deprem Hk. Basın<br>Bülteni-23 | AFAD                      | 1 | 1 | 1 | 1: 1197 | 1: 1200 |
| Kahramanmaraş'ta<br>Meydana Gelen<br>Deprem Hk. Basın<br>Bülteni-23 | AFAD                      | 1 | 1 | 1 | 1: 1197 | 1: 1200 |
| Kahramanmaraş'ta<br>Meydana Gelen<br>Deprem Hk. Basın<br>Bülteni-23 | Response\Military         | 1 | 1 | 1 | 1: 1212 | 1: 1219 |
| Kahramanmaraş'ta<br>Meydana Gelen<br>Deprem Hk. Basın<br>Bülteni-23 | Response\Military         | 1 | 1 | 1 | 1: 1212 | 1: 1219 |
| Kahramanmaraş'ta<br>Meydana Gelen<br>Deprem Hk. Basın<br>Bülteni-23 | Response\Number of staff  | 1 | 0 | 0 | 1: 1331 | 1: 1345 |
| Kahramanmaraş'ta<br>Meydana Gelen<br>Deprem Hk. Basın<br>Bülteni-23 | Response\Number           | 0 | 1 | 0 | 1: 1331 | 1: 1345 |
| Kahramanmaraş'ta<br>Meydana Gelen<br>Deprem Hk. Basın<br>Bülteni-23 | Response\Number of staff  | 1 | 0 | 0 | 1: 1387 | 1: 1401 |
| Kahramanmaraş'ta<br>Meydana Gelen<br>Deprem Hk. Basın<br>Bülteni-23 | Response\Number           | 0 | 1 | 0 | 1: 1387 | 1: 1401 |
| Kahramanmaraş'ta<br>Meydana Gelen<br>Deprem Hk. Basın<br>Bülteni-23 | Disaster                  | 1 | 1 | 1 | 1: 1417 | 1: 1420 |
| Kahramanmaraş'ta<br>Meydana Gelen<br>Deprem Hk. Basın<br>Bülteni-23 | Disaster                  | 1 | 1 | 1 | 1: 1417 | 1: 1420 |
| Kahramanmaraş'ta<br>Meydana Gelen<br>Deprem Hk. Basın<br>Bülteni-23 | Disaster                  | 1 | 1 | 1 | 1: 1582 | 1: 1585 |
| Kahramanmaraş'ta<br>Meydana Gelen<br>Deprem Hk. Basın<br>Bülteni-23 | Disaster                  | 1 | 1 | 1 | 1: 1582 | 1: 1585 |
| Kahramanmaraş'ta<br>Meydana Gelen<br>Deprem Hk. Basın<br>Bülteni-23 | AFAD                      | 1 | 1 | 1 | 1: 1636 | 1: 1639 |
| Kahramanmaraş'ta<br>Meydana Gelen<br>Deprem Hk. Basın<br>Bülteni-23 | AFAD                      | 1 | 1 | 1 | 1: 1636 | 1: 1639 |
| Kahramanmaraş'ta<br>Meydana Gelen<br>Deprem Hk. Basın<br>Bülteni-23 | Response\Coast guard&Navy | 1 | 1 | 1 | 1: 1729 | 1: 1742 |
| Kahramanmaraş'ta<br>Meydana Gelen<br>Deprem Hk. Basın<br>Bülteni-23 | Response\Coast guard&Navy | 1 | 1 | 1 | 1: 1729 | 1: 1742 |
| Kahramanmaraş'ta<br>Meydana Gelen<br>Deprem Hk. Basın<br>Bülteni-23 | Response\Military         | 1 | 1 | 1 | 1: 1747 | 1: 1754 |
| Kahramanmaraş'ta<br>Meydana Gelen<br>Deprem Hk. Basın<br>Bülteni-23 | Response\Military         | 1 | 1 | 1 | 1: 1747 | 1: 1754 |
| Kahramanmaraş'ta<br>Meydana Gelen<br>Deprem Hk. Basın<br>Bülteni-23 | Shelter&meal\Evacuation   | 1 | 1 | 1 | 1: 1953 | 1: 1959 |
| Kahramanmaraş'ta<br>Meydana Gelen<br>Deprem Hk. Basın<br>Bülteni-23 | Shelter&meal\Evacuation   | 1 | 1 | 1 | 1: 1953 | 1: 1959 |

|                                                                     |                           |   |   |   |         |         |
|---------------------------------------------------------------------|---------------------------|---|---|---|---------|---------|
| Kahramanmaraş'ta<br>Meydana Gelen<br>Deprem Hk. Basın<br>Bülteni-23 | Response\Coast guard&Navy | 1 | 1 | 1 | 1: 1970 | 1: 1985 |
| Kahramanmaraş'ta<br>Meydana Gelen<br>Deprem Hk. Basın<br>Bülteni-23 | Response\Coast guard&Navy | 1 | 1 | 1 | 1: 1970 | 1: 1985 |
| Kahramanmaraş'ta<br>Meydana Gelen<br>Deprem Hk. Basın<br>Bülteni-23 | Response\Coast guard&Navy | 1 | 1 | 1 | 1: 2014 | 1: 2027 |
| Kahramanmaraş'ta<br>Meydana Gelen<br>Deprem Hk. Basın<br>Bülteni-23 | Response\Coast guard&Navy | 1 | 1 | 1 | 1: 2014 | 1: 2027 |
| Kahramanmaraş'ta<br>Meydana Gelen<br>Deprem Hk. Basın<br>Bülteni-23 | Disaster                  | 1 | 1 | 1 | 1: 2104 | 1: 2107 |
| Kahramanmaraş'ta<br>Meydana Gelen<br>Deprem Hk. Basın<br>Bülteni-23 | Disaster                  | 1 | 1 | 1 | 1: 2104 | 1: 2107 |
| Kahramanmaraş'ta<br>Meydana Gelen<br>Deprem Hk. Basın<br>Bülteni-23 | Shelter&meal\Sheltering   | 1 | 1 | 1 | 1: 2109 | 1: 2115 |
| Kahramanmaraş'ta<br>Meydana Gelen<br>Deprem Hk. Basın<br>Bülteni-23 | Shelter&meal\Sheltering   | 1 | 1 | 1 | 1: 2109 | 1: 2115 |
| Kahramanmaraş'ta<br>Meydana Gelen<br>Deprem Hk. Basın<br>Bülteni-23 | Earthquake                | 1 | 1 | 1 | 1: 2124 | 1: 2129 |
| Kahramanmaraş'ta<br>Meydana Gelen<br>Deprem Hk. Basın<br>Bülteni-23 | Earthquake                | 1 | 1 | 1 | 1: 2124 | 1: 2129 |
| Kahramanmaraş'ta<br>Meydana Gelen<br>Deprem Hk. Basın<br>Bülteni-23 | AFAD                      | 1 | 1 | 1 | 1: 2170 | 1: 2173 |
| Kahramanmaraş'ta<br>Meydana Gelen<br>Deprem Hk. Basın<br>Bülteni-23 | AFAD                      | 1 | 1 | 1 | 1: 2170 | 1: 2173 |
| Kahramanmaraş'ta<br>Meydana Gelen<br>Deprem Hk. Basın<br>Bülteni-23 | Response\Welfare service  | 1 | 1 | 1 | 1: 2184 | 1: 2196 |
| Kahramanmaraş'ta<br>Meydana Gelen<br>Deprem Hk. Basın<br>Bülteni-23 | Response\Welfare service  | 1 | 1 | 1 | 1: 2184 | 1: 2196 |
| Kahramanmaraş'ta<br>Meydana Gelen<br>Deprem Hk. Basın<br>Bülteni-23 | Shelter&meal\Tent         | 1 | 1 | 1 | 1: 2270 | 1: 2274 |
| Kahramanmaraş'ta<br>Meydana Gelen<br>Deprem Hk. Basın<br>Bülteni-23 | Shelter&meal\Tent         | 1 | 1 | 1 | 1: 2270 | 1: 2274 |
| Kahramanmaraş'ta<br>Meydana Gelen<br>Deprem Hk. Basın<br>Bülteni-23 | Shelter&meal\Tent         | 1 | 1 | 1 | 1: 2334 | 1: 2338 |
| Kahramanmaraş'ta<br>Meydana Gelen<br>Deprem Hk. Basın<br>Bülteni-23 | Shelter&meal\Tent         | 1 | 1 | 1 | 1: 2334 | 1: 2338 |
| Kahramanmaraş'ta<br>Meydana Gelen<br>Deprem Hk. Basın<br>Bülteni-23 | Disaster                  | 1 | 1 | 1 | 1: 2370 | 1: 2373 |
| Kahramanmaraş'ta<br>Meydana Gelen<br>Deprem Hk. Basın<br>Bülteni-23 | Disaster                  | 1 | 1 | 1 | 1: 2370 | 1: 2373 |

|                                                                     |                               |   |   |   |         |         |
|---------------------------------------------------------------------|-------------------------------|---|---|---|---------|---------|
| Kahramanmaraş'ta<br>Meydana Gelen<br>Deprem Hk. Basın<br>Bülteni-23 | AFAD                          | 1 | 1 | 1 | 1: 2400 | 1: 2403 |
| Kahramanmaraş'ta<br>Meydana Gelen<br>Deprem Hk. Basın<br>Bülteni-23 | AFAD                          | 1 | 1 | 1 | 1: 2400 | 1: 2403 |
| Kahramanmaraş'ta<br>Meydana Gelen<br>Deprem Hk. Basın<br>Bülteni-23 | Response\Military             | 1 | 1 | 1 | 1: 2411 | 1: 2418 |
| Kahramanmaraş'ta<br>Meydana Gelen<br>Deprem Hk. Basın<br>Bülteni-23 | Response\Military             | 1 | 1 | 1 | 1: 2411 | 1: 2418 |
| Kahramanmaraş'ta<br>Meydana Gelen<br>Deprem Hk. Basın<br>Bülteni-23 | Coordination\NGO              | 1 | 1 | 1 | 1: 2423 | 1: 2434 |
| Kahramanmaraş'ta<br>Meydana Gelen<br>Deprem Hk. Basın<br>Bülteni-23 | Coordination\NGO              | 1 | 1 | 1 | 1: 2423 | 1: 2434 |
| Kahramanmaraş'ta<br>Meydana Gelen<br>Deprem Hk. Basın<br>Bülteni-23 | Shelter&meal\Mobile kitchen   | 1 | 1 | 1 | 1: 2515 | 1: 2526 |
| Kahramanmaraş'ta<br>Meydana Gelen<br>Deprem Hk. Basın<br>Bülteni-23 | Shelter&meal\Mobile kitchen   | 1 | 1 | 1 | 1: 2515 | 1: 2526 |
| Kahramanmaraş'ta<br>Meydana Gelen<br>Deprem Hk. Basın<br>Bülteni-23 | Shelter&meal\Mobile bakery    | 1 | 1 | 1 | 1: 2548 | 1: 2558 |
| Kahramanmaraş'ta<br>Meydana Gelen<br>Deprem Hk. Basın<br>Bülteni-23 | Shelter&meal\Mobile bakery    | 1 | 1 | 1 | 1: 2548 | 1: 2558 |
| Kahramanmaraş'ta<br>Meydana Gelen<br>Deprem Hk. Basın<br>Bülteni-23 | Disaster                      | 1 | 1 | 1 | 1: 2606 | 1: 2609 |
| Kahramanmaraş'ta<br>Meydana Gelen<br>Deprem Hk. Basın<br>Bülteni-23 | Disaster                      | 1 | 1 | 1 | 1: 2606 | 1: 2609 |
| Kahramanmaraş'ta<br>Meydana Gelen<br>Deprem Hk. Basın<br>Bülteni-23 | Shelter&meal\Hot meal         | 1 | 1 | 1 | 1: 2632 | 1: 2642 |
| Kahramanmaraş'ta<br>Meydana Gelen<br>Deprem Hk. Basın<br>Bülteni-23 | Shelter&meal\Hot meal         | 1 | 1 | 1 | 1: 2632 | 1: 2642 |
| Kahramanmaraş'ta<br>Meydana Gelen<br>Deprem Hk. Basın<br>Bülteni-23 | Disaster                      | 1 | 1 | 1 | 1: 2784 | 1: 2787 |
| Kahramanmaraş'ta<br>Meydana Gelen<br>Deprem Hk. Basın<br>Bülteni-23 | Disaster                      | 1 | 1 | 1 | 1: 2784 | 1: 2787 |
| Kahramanmaraş'ta<br>Meydana Gelen<br>Deprem Hk. Basın<br>Bülteni-23 | Response\Psychosocial support | 1 | 1 | 1 | 1: 2789 | 1: 2798 |
| Kahramanmaraş'ta<br>Meydana Gelen<br>Deprem Hk. Basın<br>Bülteni-23 | Response\Psychosocial support | 1 | 1 | 1 | 1: 2789 | 1: 2798 |
| Kahramanmaraş'ta<br>Meydana Gelen<br>Deprem Hk. Basın<br>Bülteni-23 | Response\Welfare service      | 1 | 1 | 1 | 1: 2822 | 1: 2834 |
| Kahramanmaraş'ta<br>Meydana Gelen<br>Deprem Hk. Basın<br>Bülteni-23 | Response\Welfare service      | 1 | 1 | 1 | 1: 2822 | 1: 2834 |

|                                                                     |                               |   |   |   |         |         |
|---------------------------------------------------------------------|-------------------------------|---|---|---|---------|---------|
| Kahramanmaraş'ta<br>Meydana Gelen<br>Deprem Hk. Basın<br>Bülteni-23 | Kahramanmaraş                 | 1 | 0 | 0 | 1: 2845 | 1: 2857 |
| Kahramanmaraş'ta<br>Meydana Gelen<br>Deprem Hk. Basın<br>Bülteni-23 | Pazarcık                      | 0 | 1 | 0 | 1: 2845 | 1: 2857 |
| Kahramanmaraş'ta<br>Meydana Gelen<br>Deprem Hk. Basın<br>Bülteni-23 | Earthquake                    | 1 | 1 | 1 | 1: 2970 | 1: 2975 |
| Kahramanmaraş'ta<br>Meydana Gelen<br>Deprem Hk. Basın<br>Bülteni-23 | Earthquake                    | 1 | 1 | 1 | 1: 2970 | 1: 2975 |
| Kahramanmaraş'ta<br>Meydana Gelen<br>Deprem Hk. Basın<br>Bülteni-23 | Earthquake                    | 1 | 1 | 1 | 1: 2996 | 1: 3001 |
| Kahramanmaraş'ta<br>Meydana Gelen<br>Deprem Hk. Basın<br>Bülteni-23 | Earthquake                    | 1 | 1 | 1 | 1: 2996 | 1: 3001 |
| Kahramanmaraş'ta<br>Meydana Gelen<br>Deprem Hk. Basın<br>Bülteni-23 | Response\Psychosocial support | 1 | 1 | 1 | 1: 3059 | 1: 3069 |
| Kahramanmaraş'ta<br>Meydana Gelen<br>Deprem Hk. Basın<br>Bülteni-23 | Response\Psychosocial support | 1 | 1 | 1 | 1: 3059 | 1: 3069 |
| Kahramanmaraş'ta<br>Meydana Gelen<br>Deprem Hk. Basın<br>Bülteni-23 | Kahramanmaraş                 | 1 | 0 | 0 | 2: 17   | 2: 29   |
| Kahramanmaraş'ta<br>Meydana Gelen<br>Deprem Hk. Basın<br>Bülteni-23 | Pazarcık                      | 0 | 1 | 0 | 2: 17   | 2: 29   |
| Kahramanmaraş'ta<br>Meydana Gelen<br>Deprem Hk. Basın<br>Bülteni-23 | Earthquake                    | 1 | 1 | 1 | 2: 48   | 2: 53   |
| Kahramanmaraş'ta<br>Meydana Gelen<br>Deprem Hk. Basın<br>Bülteni-23 | Earthquake                    | 1 | 1 | 1 | 2: 48   | 2: 53   |
| Kahramanmaraş'ta<br>Meydana Gelen<br>Deprem Hk. Basın<br>Bülteni-23 | AFAD                          | 1 | 1 | 1 | 2: 92   | 2: 95   |
| Kahramanmaraş'ta<br>Meydana Gelen<br>Deprem Hk. Basın<br>Bülteni-23 | AFAD                          | 1 | 1 | 1 | 2: 92   | 2: 95   |
| Kahramanmaraş'ta<br>Meydana Gelen<br>Deprem Hk. Basın<br>Bülteni-23 | Earthquake                    | 1 | 1 | 1 | 2: 134  | 2: 139  |
| Kahramanmaraş'ta<br>Meydana Gelen<br>Deprem Hk. Basın<br>Bülteni-23 | Earthquake                    | 1 | 1 | 1 | 2: 134  | 2: 139  |
| Kahramanmaraş'ta<br>Meydana Gelen<br>Deprem Hk. Basın<br>Bülteni-23 | Disaster                      | 1 | 1 | 1 | 2: 323  | 2: 326  |
| Kahramanmaraş'ta<br>Meydana Gelen<br>Deprem Hk. Basın<br>Bülteni-23 | Disaster                      | 1 | 1 | 1 | 2: 323  | 2: 326  |
| Kahramanmaraş'ta<br>Meydana Gelen<br>Deprem Hk. Basın<br>Bülteni-23 | Coordination\Public relations | 1 | 1 | 1 | 2: 482  | 2: 487  |
| Kahramanmaraş'ta<br>Meydana Gelen<br>Deprem Hk. Basın<br>Bülteni-23 | Coordination\Public relations | 1 | 1 | 1 | 2: 482  | 2: 487  |

|                                                                     |                           |   |   |   |         |         |
|---------------------------------------------------------------------|---------------------------|---|---|---|---------|---------|
| Kahramanmaraş'ta<br>Meydana Gelen<br>Deprem Hk. Basın<br>Bülteni-23 | AFAD                      | 1 | 1 | 1 | 2: 522  | 2: 525  |
| Kahramanmaraş'ta<br>Meydana Gelen<br>Deprem Hk. Basın<br>Bülteni-23 | AFAD                      | 1 | 1 | 1 | 2: 522  | 2: 525  |
| Kahramanmaraş'ta<br>Meydana Gelen<br>Deprem Hk. Basın<br>Bülteni-23 | AFAD                      | 1 | 1 | 1 | 2: 580  | 2: 583  |
| Kahramanmaraş'ta<br>Meydana Gelen<br>Deprem Hk. Basın<br>Bülteni-23 | AFAD                      | 1 | 1 | 1 | 2: 580  | 2: 583  |
| Kahramanmaraş'ta<br>Meydana Gelen<br>Deprem Hk. Basın<br>Bülteni-23 | AFAD                      | 1 | 1 | 1 | 2: 697  | 2: 700  |
| Kahramanmaraş'ta<br>Meydana Gelen<br>Deprem Hk. Basın<br>Bülteni-23 | AFAD                      | 1 | 1 | 1 | 2: 697  | 2: 700  |
| Kahramanmaraş'ta<br>Meydana Gelen<br>Deprem Hk. Basın<br>Bülteni-23 | Response\Search&Rescue    | 1 | 1 | 1 | 2: 791  | 2: 804  |
| Kahramanmaraş'ta<br>Meydana Gelen<br>Deprem Hk. Basın<br>Bülteni-23 | Response\Search&Rescue    | 1 | 1 | 1 | 2: 791  | 2: 804  |
| Kahramanmaraş'ta<br>Meydana Gelen<br>Deprem Hk. Basın<br>Bülteni-23 | Disaster                  | 1 | 1 | 1 | 2: 855  | 2: 858  |
| Kahramanmaraş'ta<br>Meydana Gelen<br>Deprem Hk. Basın<br>Bülteni-23 | Disaster                  | 1 | 1 | 1 | 2: 855  | 2: 858  |
| Kahramanmaraş'ta<br>Meydana Gelen<br>Deprem Hk. Basın<br>Bülteni-23 | AFAD                      | 1 | 1 | 1 | 2: 873  | 2: 876  |
| Kahramanmaraş'ta<br>Meydana Gelen<br>Deprem Hk. Basın<br>Bülteni-23 | AFAD                      | 1 | 1 | 1 | 2: 873  | 2: 876  |
| Kahramanmaraş'ta<br>Meydana Gelen<br>Deprem Hk. Basın<br>Bülteni-23 | Preparedness\Preparedness | 1 | 1 | 1 | 2: 937  | 2: 947  |
| Kahramanmaraş'ta<br>Meydana Gelen<br>Deprem Hk. Basın<br>Bülteni-23 | Preparedness\Preparedness | 1 | 1 | 1 | 2: 937  | 2: 947  |
| Kahramanmaraş'ta<br>Meydana Gelen<br>Deprem Hk. Basın<br>Bülteni-23 | Disaster                  | 1 | 1 | 1 | 2: 937  | 2: 940  |
| Kahramanmaraş'ta<br>Meydana Gelen<br>Deprem Hk. Basın<br>Bülteni-23 | Disaster                  | 1 | 1 | 1 | 2: 937  | 2: 940  |
| Kahramanmaraş'ta<br>Meydana Gelen<br>Deprem Hk. Basın<br>Bülteni-23 | Disaster                  | 1 | 1 | 1 | 2: 985  | 2: 988  |
| Kahramanmaraş'ta<br>Meydana Gelen<br>Deprem Hk. Basın<br>Bülteni-23 | Disaster                  | 1 | 1 | 1 | 2: 985  | 2: 988  |
| Kahramanmaraş'ta<br>Meydana Gelen<br>Deprem Hk. Basın<br>Bülteni-23 | Recovery\Fund drive       | 1 | 1 | 1 | 2: 1046 | 2: 1064 |
| Kahramanmaraş'ta<br>Meydana Gelen<br>Deprem Hk. Basın<br>Bülteni-23 | Recovery\Fund drive       | 1 | 1 | 1 | 2: 1046 | 2: 1064 |

|                                                                     |                                 |   |   |   |         |         |
|---------------------------------------------------------------------|---------------------------------|---|---|---|---------|---------|
| Kahramanmaraş'ta<br>Meydana Gelen<br>Deprem Hk. Basın<br>Bülteni-23 | Coordination\Social media       | 1 | 0 | 0 | 2: 1162 | 2: 1173 |
| Kahramanmaraş'ta<br>Meydana Gelen<br>Deprem Hk. Basın<br>Bülteni-23 | Coordination\Social media usage | 0 | 1 | 0 | 2: 1162 | 2: 1173 |
| Kahramanmaraş'ta<br>Meydana Gelen<br>Deprem Hk. Basın<br>Bülteni-23 | AFAD                            | 1 | 1 | 1 | 2: 1218 | 2: 1221 |
| Kahramanmaraş'ta<br>Meydana Gelen<br>Deprem Hk. Basın<br>Bülteni-23 | AFAD                            | 1 | 1 | 1 | 2: 1218 | 2: 1221 |
| Kahramanmaraş'ta<br>Meydana Gelen<br>Deprem Hk. Basın<br>Bülteni-23 | AFAD                            | 1 | 1 | 1 | 2: 1240 | 2: 1243 |
| Kahramanmaraş'ta<br>Meydana Gelen<br>Deprem Hk. Basın<br>Bülteni-23 | AFAD                            | 1 | 1 | 1 | 2: 1240 | 2: 1243 |
| Kahramanmaraş'ta<br>Meydana Gelen<br>Deprem Hk. Basın<br>Bülteni-23 | Coordination\Information        | 1 | 1 | 1 | 2: 1285 | 2: 1296 |
| Kahramanmaraş'ta<br>Meydana Gelen<br>Deprem Hk. Basın<br>Bülteni-23 | Coordination\Information        | 1 | 1 | 1 | 2: 1285 | 2: 1296 |
| Kahramanmaraş'ta<br>Meydana Gelen<br>Deprem Hk. Basın<br>Bülteni-23 | Recovery\Peacemaking            | 1 | 1 | 1 | 2: 1301 | 2: 1310 |
| Kahramanmaraş'ta<br>Meydana Gelen<br>Deprem Hk. Basın<br>Bülteni-23 | Recovery\Peacemaking            | 1 | 1 | 1 | 2: 1301 | 2: 1310 |
| Kahramanmaraş'ta<br>Meydana Gelen<br>Deprem Hk. Basın<br>Bülteni-23 | Coordination\Social media       | 1 | 0 | 0 | 2: 1357 | 2: 1368 |
| Kahramanmaraş'ta<br>Meydana Gelen<br>Deprem Hk. Basın<br>Bülteni-23 | Coordination\Social media usage | 0 | 1 | 0 | 2: 1357 | 2: 1368 |
| Kahramanmaraş'ta<br>Meydana Gelen<br>Deprem Hk. Basın<br>Bülteni-23 | Kahramanmaraş                   | 1 | 0 | 0 | 3: 17   | 3: 29   |
| Kahramanmaraş'ta<br>Meydana Gelen<br>Deprem Hk. Basın<br>Bülteni-23 | Pazarcık                        | 0 | 1 | 0 | 3: 17   | 3: 29   |
| Kahramanmaraş'ta<br>Meydana Gelen<br>Deprem Hk. Basın<br>Bülteni-23 | Earthquake                      | 1 | 1 | 1 | 3: 48   | 3: 53   |
| Kahramanmaraş'ta<br>Meydana Gelen<br>Deprem Hk. Basın<br>Bülteni-23 | Earthquake                      | 1 | 1 | 1 | 3: 48   | 3: 53   |
| Kahramanmaraş'ta<br>Meydana Gelen<br>Deprem Hk. Basın<br>Bülteni-23 | AFAD                            | 1 | 1 | 1 | 3: 92   | 3: 95   |
| Kahramanmaraş'ta<br>Meydana Gelen<br>Deprem Hk. Basın<br>Bülteni-23 | AFAD                            | 1 | 1 | 1 | 3: 92   | 3: 95   |
| Kahramanmaraş'ta<br>Meydana Gelen<br>Deprem Hk. Basın<br>Bülteni-23 | Earthquake                      | 1 | 1 | 1 | 3: 134  | 3: 139  |
| Kahramanmaraş'ta<br>Meydana Gelen<br>Deprem Hk. Basın<br>Bülteni-23 | Earthquake                      | 1 | 1 | 1 | 3: 134  | 3: 139  |



|                                                                     |               |   |   |   |        |        |
|---------------------------------------------------------------------|---------------|---|---|---|--------|--------|
| Kahramanmaraş'ta<br>Meydana Gelen<br>Deprem Hk. Basın<br>Bülteni-23 | Disaster      | 1 | 1 | 1 | 3: 199 | 3: 202 |
| Kahramanmaraş'ta<br>Meydana Gelen<br>Deprem Hk. Basın<br>Bülteni-23 | Disaster      | 1 | 1 | 1 | 3: 199 | 3: 202 |
| Kahramanmaraş'ta<br>Meydana Gelen<br>Deprem Hk. Basın<br>Bülteni-23 | Emergency     | 1 | 1 | 1 | 3: 207 | 3: 216 |
| Kahramanmaraş'ta<br>Meydana Gelen<br>Deprem Hk. Basın<br>Bülteni-23 | Emergency     | 1 | 1 | 1 | 3: 207 | 3: 216 |
| Kahramanmaraş'ta<br>Meydana Gelen<br>Deprem Hk. Basın<br>Bülteni-24 | Kahramanmaraş | 1 | 0 | 0 | 1: 17  | 1: 29  |
| Kahramanmaraş'ta<br>Meydana Gelen<br>Deprem Hk. Basın<br>Bülteni-24 | Pazarcık      | 0 | 1 | 0 | 1: 17  | 1: 29  |
| Kahramanmaraş'ta<br>Meydana Gelen<br>Deprem Hk. Basın<br>Bülteni-24 | Earthquake    | 1 | 1 | 1 | 1: 48  | 1: 53  |
| Kahramanmaraş'ta<br>Meydana Gelen<br>Deprem Hk. Basın<br>Bülteni-24 | Earthquake    | 1 | 1 | 1 | 1: 48  | 1: 53  |
| Kahramanmaraş'ta<br>Meydana Gelen<br>Deprem Hk. Basın<br>Bülteni-24 | AFAD          | 1 | 1 | 1 | 1: 92  | 1: 95  |
| Kahramanmaraş'ta<br>Meydana Gelen<br>Deprem Hk. Basın<br>Bülteni-24 | AFAD          | 1 | 1 | 1 | 1: 92  | 1: 95  |
| Kahramanmaraş'ta<br>Meydana Gelen<br>Deprem Hk. Basın<br>Bülteni-24 | Earthquake    | 1 | 1 | 1 | 1: 134 | 1: 139 |
| Kahramanmaraş'ta<br>Meydana Gelen<br>Deprem Hk. Basın<br>Bülteni-24 | Earthquake    | 1 | 1 | 1 | 1: 134 | 1: 139 |
| Kahramanmaraş'ta<br>Meydana Gelen<br>Deprem Hk. Basın<br>Bülteni-24 | Kahramanmaraş | 1 | 0 | 0 | 1: 169 | 1: 181 |
| Kahramanmaraş'ta<br>Meydana Gelen<br>Deprem Hk. Basın<br>Bülteni-24 | Pazarcık      | 0 | 1 | 0 | 1: 169 | 1: 181 |
| Kahramanmaraş'ta<br>Meydana Gelen<br>Deprem Hk. Basın<br>Bülteni-24 | Earthquake    | 1 | 1 | 1 | 1: 200 | 1: 205 |
| Kahramanmaraş'ta<br>Meydana Gelen<br>Deprem Hk. Basın<br>Bülteni-24 | Earthquake    | 1 | 1 | 1 | 1: 200 | 1: 205 |
| Kahramanmaraş'ta<br>Meydana Gelen<br>Deprem Hk. Basın<br>Bülteni-24 | Kahramanmaraş | 1 | 0 | 0 | 1: 282 | 1: 294 |
| Kahramanmaraş'ta<br>Meydana Gelen<br>Deprem Hk. Basın<br>Bülteni-24 | Pazarcık      | 0 | 1 | 0 | 1: 282 | 1: 294 |
| Kahramanmaraş'ta<br>Meydana Gelen<br>Deprem Hk. Basın<br>Bülteni-24 | Earthquake    | 1 | 1 | 1 | 1: 313 | 1: 318 |
| Kahramanmaraş'ta<br>Meydana Gelen<br>Deprem Hk. Basın<br>Bülteni-24 | Earthquake    | 1 | 1 | 1 | 1: 313 | 1: 318 |

|                                                                     |                           |   |   |   |        |        |
|---------------------------------------------------------------------|---------------------------|---|---|---|--------|--------|
| Kahramanmaraş'ta<br>Meydana Gelen<br>Deprem Hk. Basın<br>Bülteni-24 | Kahramanmaraş             | 1 | 0 | 0 | 1: 379 | 1: 391 |
| Kahramanmaraş'ta<br>Meydana Gelen<br>Deprem Hk. Basın<br>Bülteni-24 | Pazarcık                  | 0 | 1 | 0 | 1: 379 | 1: 391 |
| Kahramanmaraş'ta<br>Meydana Gelen<br>Deprem Hk. Basın<br>Bülteni-24 | Earthquake                | 1 | 1 | 1 | 1: 473 | 1: 478 |
| Kahramanmaraş'ta<br>Meydana Gelen<br>Deprem Hk. Basın<br>Bülteni-24 | Earthquake                | 1 | 1 | 1 | 1: 473 | 1: 478 |
| Kahramanmaraş'ta<br>Meydana Gelen<br>Deprem Hk. Basın<br>Bülteni-24 | Earthquake                | 1 | 1 | 1 | 1: 500 | 1: 505 |
| Kahramanmaraş'ta<br>Meydana Gelen<br>Deprem Hk. Basın<br>Bülteni-24 | Earthquake                | 1 | 1 | 1 | 1: 500 | 1: 505 |
| Kahramanmaraş'ta<br>Meydana Gelen<br>Deprem Hk. Basın<br>Bülteni-24 | Earthquake                | 1 | 1 | 1 | 1: 533 | 1: 538 |
| Kahramanmaraş'ta<br>Meydana Gelen<br>Deprem Hk. Basın<br>Bülteni-24 | Earthquake                | 1 | 1 | 1 | 1: 533 | 1: 538 |
| Kahramanmaraş'ta<br>Meydana Gelen<br>Deprem Hk. Basın<br>Bülteni-24 | Kahramanmaraş             | 1 | 0 | 0 | 1: 596 | 1: 608 |
| Kahramanmaraş'ta<br>Meydana Gelen<br>Deprem Hk. Basın<br>Bülteni-24 | Pazarcık                  | 0 | 1 | 0 | 1: 596 | 1: 608 |
| Kahramanmaraş'ta<br>Meydana Gelen<br>Deprem Hk. Basın<br>Bülteni-24 | Disaster                  | 1 | 1 | 1 | 1: 804 | 1: 807 |
| Kahramanmaraş'ta<br>Meydana Gelen<br>Deprem Hk. Basın<br>Bülteni-24 | Disaster                  | 1 | 1 | 1 | 1: 804 | 1: 807 |
| Kahramanmaraş'ta<br>Meydana Gelen<br>Deprem Hk. Basın<br>Bülteni-24 | Shelter&meal\Evacuation   | 1 | 1 | 1 | 1: 836 | 1: 842 |
| Kahramanmaraş'ta<br>Meydana Gelen<br>Deprem Hk. Basın<br>Bülteni-24 | Shelter&meal\Evacuation   | 1 | 1 | 1 | 1: 836 | 1: 842 |
| Kahramanmaraş'ta<br>Meydana Gelen<br>Deprem Hk. Basın<br>Bülteni-24 | AFAD                      | 1 | 1 | 1 | 1: 867 | 1: 870 |
| Kahramanmaraş'ta<br>Meydana Gelen<br>Deprem Hk. Basın<br>Bülteni-24 | AFAD                      | 1 | 1 | 1 | 1: 867 | 1: 870 |
| Kahramanmaraş'ta<br>Meydana Gelen<br>Deprem Hk. Basın<br>Bülteni-24 | Response\Coast guard&Navy | 1 | 1 | 1 | 1: 896 | 1: 909 |
| Kahramanmaraş'ta<br>Meydana Gelen<br>Deprem Hk. Basın<br>Bülteni-24 | Response\Coast guard&Navy | 1 | 1 | 1 | 1: 896 | 1: 909 |
| Kahramanmaraş'ta<br>Meydana Gelen<br>Deprem Hk. Basın<br>Bülteni-24 | Response\Number of staff  | 1 | 0 | 0 | 1: 973 | 1: 995 |
| Kahramanmaraş'ta<br>Meydana Gelen<br>Deprem Hk. Basın<br>Bülteni-24 | Response\Search&Rescue    | 1 | 1 | 1 | 1: 973 | 1: 986 |

|                                                                     |                          |   |   |   |         |         |
|---------------------------------------------------------------------|--------------------------|---|---|---|---------|---------|
| Kahramanmaraş'ta<br>Meydana Gelen<br>Deprem Hk. Basın<br>Bülteni-24 | Response\Search&Rescue   | 1 | 1 | 1 | 1: 973  | 1: 986  |
| Kahramanmaraş'ta<br>Meydana Gelen<br>Deprem Hk. Basın<br>Bülteni-24 | Response\Number          | 0 | 1 | 0 | 1: 973  | 1: 995  |
| Kahramanmaraş'ta<br>Meydana Gelen<br>Deprem Hk. Basın<br>Bülteni-24 | Response\Number of staff | 1 | 0 | 0 | 1: 1024 | 1: 1046 |
| Kahramanmaraş'ta<br>Meydana Gelen<br>Deprem Hk. Basın<br>Bülteni-24 | Response\Search&Rescue   | 1 | 1 | 1 | 1: 1024 | 1: 1037 |
| Kahramanmaraş'ta<br>Meydana Gelen<br>Deprem Hk. Basın<br>Bülteni-24 | Response\Search&Rescue   | 1 | 1 | 1 | 1: 1024 | 1: 1037 |
| Kahramanmaraş'ta<br>Meydana Gelen<br>Deprem Hk. Basın<br>Bülteni-24 | Response\Number          | 0 | 1 | 0 | 1: 1024 | 1: 1046 |
| Kahramanmaraş'ta<br>Meydana Gelen<br>Deprem Hk. Basın<br>Bülteni-24 | Response\Number of staff | 1 | 0 | 0 | 1: 1147 | 1: 1169 |
| Kahramanmaraş'ta<br>Meydana Gelen<br>Deprem Hk. Basın<br>Bülteni-24 | Response\Search&Rescue   | 1 | 1 | 1 | 1: 1147 | 1: 1160 |
| Kahramanmaraş'ta<br>Meydana Gelen<br>Deprem Hk. Basın<br>Bülteni-24 | Response\Search&Rescue   | 1 | 1 | 1 | 1: 1147 | 1: 1160 |
| Kahramanmaraş'ta<br>Meydana Gelen<br>Deprem Hk. Basın<br>Bülteni-24 | Response\Number          | 0 | 1 | 0 | 1: 1147 | 1: 1169 |
| Kahramanmaraş'ta<br>Meydana Gelen<br>Deprem Hk. Basın<br>Bülteni-24 | AFAD                     | 1 | 1 | 1 | 1: 1198 | 1: 1201 |
| Kahramanmaraş'ta<br>Meydana Gelen<br>Deprem Hk. Basın<br>Bülteni-24 | AFAD                     | 1 | 1 | 1 | 1: 1198 | 1: 1201 |
| Kahramanmaraş'ta<br>Meydana Gelen<br>Deprem Hk. Basın<br>Bülteni-24 | Response\Military        | 1 | 1 | 1 | 1: 1213 | 1: 1220 |
| Kahramanmaraş'ta<br>Meydana Gelen<br>Deprem Hk. Basın<br>Bülteni-24 | Response\Military        | 1 | 1 | 1 | 1: 1213 | 1: 1220 |
| Kahramanmaraş'ta<br>Meydana Gelen<br>Deprem Hk. Basın<br>Bülteni-24 | Response\Number of staff | 1 | 0 | 0 | 1: 1332 | 1: 1346 |
| Kahramanmaraş'ta<br>Meydana Gelen<br>Deprem Hk. Basın<br>Bülteni-24 | Response\Number          | 0 | 1 | 0 | 1: 1332 | 1: 1346 |
| Kahramanmaraş'ta<br>Meydana Gelen<br>Deprem Hk. Basın<br>Bülteni-24 | Disaster                 | 1 | 1 | 1 | 1: 1418 | 1: 1421 |
| Kahramanmaraş'ta<br>Meydana Gelen<br>Deprem Hk. Basın<br>Bülteni-24 | Disaster                 | 1 | 1 | 1 | 1: 1418 | 1: 1421 |
| Kahramanmaraş'ta<br>Meydana Gelen<br>Deprem Hk. Basın<br>Bülteni-24 | Disaster                 | 1 | 1 | 1 | 1: 1583 | 1: 1586 |
| Kahramanmaraş'ta<br>Meydana Gelen<br>Deprem Hk. Basın<br>Bülteni-24 | Disaster                 | 1 | 1 | 1 | 1: 1583 | 1: 1586 |

|                                                                     |                           |   |   |   |         |         |
|---------------------------------------------------------------------|---------------------------|---|---|---|---------|---------|
| Kahramanmaraş'ta<br>Meydana Gelen<br>Deprem Hk. Basın<br>Bülteni-24 | AFAD                      | 1 | 1 | 1 | 1: 1637 | 1: 1640 |
| Kahramanmaraş'ta<br>Meydana Gelen<br>Deprem Hk. Basın<br>Bülteni-24 | AFAD                      | 1 | 1 | 1 | 1: 1637 | 1: 1640 |
| Kahramanmaraş'ta<br>Meydana Gelen<br>Deprem Hk. Basın<br>Bülteni-24 | Response\Coast guard&Navy | 1 | 1 | 1 | 1: 1731 | 1: 1744 |
| Kahramanmaraş'ta<br>Meydana Gelen<br>Deprem Hk. Basın<br>Bülteni-24 | Response\Coast guard&Navy | 1 | 1 | 1 | 1: 1731 | 1: 1744 |
| Kahramanmaraş'ta<br>Meydana Gelen<br>Deprem Hk. Basın<br>Bülteni-24 | Response\Military         | 1 | 1 | 1 | 1: 1749 | 1: 1756 |
| Kahramanmaraş'ta<br>Meydana Gelen<br>Deprem Hk. Basın<br>Bülteni-24 | Response\Military         | 1 | 1 | 1 | 1: 1749 | 1: 1756 |
| Kahramanmaraş'ta<br>Meydana Gelen<br>Deprem Hk. Basın<br>Bülteni-24 | Shelter&meal\Evacuation   | 1 | 1 | 1 | 1: 1955 | 1: 1961 |
| Kahramanmaraş'ta<br>Meydana Gelen<br>Deprem Hk. Basın<br>Bülteni-24 | Shelter&meal\Evacuation   | 1 | 1 | 1 | 1: 1955 | 1: 1961 |
| Kahramanmaraş'ta<br>Meydana Gelen<br>Deprem Hk. Basın<br>Bülteni-24 | Response\Coast guard&Navy | 1 | 1 | 1 | 1: 1972 | 1: 1987 |
| Kahramanmaraş'ta<br>Meydana Gelen<br>Deprem Hk. Basın<br>Bülteni-24 | Response\Coast guard&Navy | 1 | 1 | 1 | 1: 1972 | 1: 1987 |
| Kahramanmaraş'ta<br>Meydana Gelen<br>Deprem Hk. Basın<br>Bülteni-24 | Response\Coast guard&Navy | 1 | 1 | 1 | 1: 2016 | 1: 2029 |
| Kahramanmaraş'ta<br>Meydana Gelen<br>Deprem Hk. Basın<br>Bülteni-24 | Response\Coast guard&Navy | 1 | 1 | 1 | 1: 2016 | 1: 2029 |
| Kahramanmaraş'ta<br>Meydana Gelen<br>Deprem Hk. Basın<br>Bülteni-24 | Disaster                  | 1 | 1 | 1 | 1: 2106 | 1: 2109 |
| Kahramanmaraş'ta<br>Meydana Gelen<br>Deprem Hk. Basın<br>Bülteni-24 | Disaster                  | 1 | 1 | 1 | 1: 2106 | 1: 2109 |
| Kahramanmaraş'ta<br>Meydana Gelen<br>Deprem Hk. Basın<br>Bülteni-24 | Shelter&meal\Sheltering   | 1 | 1 | 1 | 1: 2111 | 1: 2117 |
| Kahramanmaraş'ta<br>Meydana Gelen<br>Deprem Hk. Basın<br>Bülteni-24 | Shelter&meal\Sheltering   | 1 | 1 | 1 | 1: 2111 | 1: 2117 |
| Kahramanmaraş'ta<br>Meydana Gelen<br>Deprem Hk. Basın<br>Bülteni-24 | Earthquake                | 1 | 1 | 1 | 1: 2126 | 1: 2131 |
| Kahramanmaraş'ta<br>Meydana Gelen<br>Deprem Hk. Basın<br>Bülteni-24 | Earthquake                | 1 | 1 | 1 | 1: 2126 | 1: 2131 |
| Kahramanmaraş'ta<br>Meydana Gelen<br>Deprem Hk. Basın<br>Bülteni-24 | AFAD                      | 1 | 1 | 1 | 1: 2172 | 1: 2175 |
| Kahramanmaraş'ta<br>Meydana Gelen<br>Deprem Hk. Basın<br>Bülteni-24 | AFAD                      | 1 | 1 | 1 | 1: 2172 | 1: 2175 |

|                                                                     |                             |   |   |   |         |         |
|---------------------------------------------------------------------|-----------------------------|---|---|---|---------|---------|
| Kahramanmaraş'ta<br>Meydana Gelen<br>Deprem Hk. Basın<br>Bülteni-24 | Response\Welfare service    | 1 | 1 | 1 | 1: 2186 | 1: 2198 |
| Kahramanmaraş'ta<br>Meydana Gelen<br>Deprem Hk. Basın<br>Bülteni-24 | Response\Welfare service    | 1 | 1 | 1 | 1: 2186 | 1: 2198 |
| Kahramanmaraş'ta<br>Meydana Gelen<br>Deprem Hk. Basın<br>Bülteni-24 | Shelter&meal\Tent           | 1 | 1 | 1 | 1: 2272 | 1: 2276 |
| Kahramanmaraş'ta<br>Meydana Gelen<br>Deprem Hk. Basın<br>Bülteni-24 | Shelter&meal\Tent           | 1 | 1 | 1 | 1: 2272 | 1: 2276 |
| Kahramanmaraş'ta<br>Meydana Gelen<br>Deprem Hk. Basın<br>Bülteni-24 | Shelter&meal\Tent           | 1 | 1 | 1 | 1: 2336 | 1: 2340 |
| Kahramanmaraş'ta<br>Meydana Gelen<br>Deprem Hk. Basın<br>Bülteni-24 | Shelter&meal\Tent           | 1 | 1 | 1 | 1: 2336 | 1: 2340 |
| Kahramanmaraş'ta<br>Meydana Gelen<br>Deprem Hk. Basın<br>Bülteni-24 | Disaster                    | 1 | 1 | 1 | 1: 2371 | 1: 2374 |
| Kahramanmaraş'ta<br>Meydana Gelen<br>Deprem Hk. Basın<br>Bülteni-24 | Disaster                    | 1 | 1 | 1 | 1: 2371 | 1: 2374 |
| Kahramanmaraş'ta<br>Meydana Gelen<br>Deprem Hk. Basın<br>Bülteni-24 | AFAD                        | 1 | 1 | 1 | 1: 2401 | 1: 2404 |
| Kahramanmaraş'ta<br>Meydana Gelen<br>Deprem Hk. Basın<br>Bülteni-24 | AFAD                        | 1 | 1 | 1 | 1: 2401 | 1: 2404 |
| Kahramanmaraş'ta<br>Meydana Gelen<br>Deprem Hk. Basın<br>Bülteni-24 | Response\Military           | 1 | 1 | 1 | 1: 2412 | 1: 2419 |
| Kahramanmaraş'ta<br>Meydana Gelen<br>Deprem Hk. Basın<br>Bülteni-24 | Response\Military           | 1 | 1 | 1 | 1: 2412 | 1: 2419 |
| Kahramanmaraş'ta<br>Meydana Gelen<br>Deprem Hk. Basın<br>Bülteni-24 | Coordination\NGO            | 1 | 1 | 1 | 1: 2424 | 1: 2435 |
| Kahramanmaraş'ta<br>Meydana Gelen<br>Deprem Hk. Basın<br>Bülteni-24 | Coordination\NGO            | 1 | 1 | 1 | 1: 2424 | 1: 2435 |
| Kahramanmaraş'ta<br>Meydana Gelen<br>Deprem Hk. Basın<br>Bülteni-24 | Shelter&meal\Mobile kitchen | 1 | 1 | 1 | 1: 2515 | 1: 2526 |
| Kahramanmaraş'ta<br>Meydana Gelen<br>Deprem Hk. Basın<br>Bülteni-24 | Shelter&meal\Mobile kitchen | 1 | 1 | 1 | 1: 2515 | 1: 2526 |
| Kahramanmaraş'ta<br>Meydana Gelen<br>Deprem Hk. Basın<br>Bülteni-24 | Disaster                    | 1 | 1 | 1 | 1: 2606 | 1: 2609 |
| Kahramanmaraş'ta<br>Meydana Gelen<br>Deprem Hk. Basın<br>Bülteni-24 | Disaster                    | 1 | 1 | 1 | 1: 2606 | 1: 2609 |
| Kahramanmaraş'ta<br>Meydana Gelen<br>Deprem Hk. Basın<br>Bülteni-24 | Shelter&meal\Hot meal       | 1 | 1 | 1 | 1: 2632 | 1: 2642 |
| Kahramanmaraş'ta<br>Meydana Gelen<br>Deprem Hk. Basın<br>Bülteni-24 | Shelter&meal\Hot meal       | 1 | 1 | 1 | 1: 2632 | 1: 2642 |

|                                                                     |                               |   |   |   |         |         |
|---------------------------------------------------------------------|-------------------------------|---|---|---|---------|---------|
| Kahramanmaraş'ta<br>Meydana Gelen<br>Deprem Hk. Basın<br>Bülteni-24 | Disaster                      | 1 | 1 | 1 | 1: 2783 | 1: 2786 |
| Kahramanmaraş'ta<br>Meydana Gelen<br>Deprem Hk. Basın<br>Bülteni-24 | Disaster                      | 1 | 1 | 1 | 1: 2783 | 1: 2786 |
| Kahramanmaraş'ta<br>Meydana Gelen<br>Deprem Hk. Basın<br>Bülteni-24 | Response\Psychosocial support | 1 | 1 | 1 | 1: 2788 | 1: 2797 |
| Kahramanmaraş'ta<br>Meydana Gelen<br>Deprem Hk. Basın<br>Bülteni-24 | Response\Psychosocial support | 1 | 1 | 1 | 1: 2788 | 1: 2797 |
| Kahramanmaraş'ta<br>Meydana Gelen<br>Deprem Hk. Basın<br>Bülteni-24 | Response\Welfare service      | 1 | 1 | 1 | 1: 2821 | 1: 2833 |
| Kahramanmaraş'ta<br>Meydana Gelen<br>Deprem Hk. Basın<br>Bülteni-24 | Response\Welfare service      | 1 | 1 | 1 | 1: 2821 | 1: 2833 |
| Kahramanmaraş'ta<br>Meydana Gelen<br>Deprem Hk. Basın<br>Bülteni-24 | Kahramanmaraş                 | 1 | 0 | 0 | 1: 2844 | 1: 2856 |
| Kahramanmaraş'ta<br>Meydana Gelen<br>Deprem Hk. Basın<br>Bülteni-24 | Pazarcık                      | 0 | 1 | 0 | 1: 2844 | 1: 2856 |
| Kahramanmaraş'ta<br>Meydana Gelen<br>Deprem Hk. Basın<br>Bülteni-24 | Earthquake                    | 1 | 1 | 1 | 1: 2969 | 1: 2974 |
| Kahramanmaraş'ta<br>Meydana Gelen<br>Deprem Hk. Basın<br>Bülteni-24 | Earthquake                    | 1 | 1 | 1 | 1: 2969 | 1: 2974 |
| Kahramanmaraş'ta<br>Meydana Gelen<br>Deprem Hk. Basın<br>Bülteni-24 | Earthquake                    | 1 | 1 | 1 | 1: 2995 | 1: 3000 |
| Kahramanmaraş'ta<br>Meydana Gelen<br>Deprem Hk. Basın<br>Bülteni-24 | Earthquake                    | 1 | 1 | 1 | 1: 2995 | 1: 3000 |
| Kahramanmaraş'ta<br>Meydana Gelen<br>Deprem Hk. Basın<br>Bülteni-24 | Response\Psychosocial support | 1 | 1 | 1 | 1: 3058 | 1: 3068 |
| Kahramanmaraş'ta<br>Meydana Gelen<br>Deprem Hk. Basın<br>Bülteni-24 | Response\Psychosocial support | 1 | 1 | 1 | 1: 3058 | 1: 3068 |
| Kahramanmaraş'ta<br>Meydana Gelen<br>Deprem Hk. Basın<br>Bülteni-24 | Kahramanmaraş                 | 1 | 0 | 0 | 2: 17   | 2: 29   |
| Kahramanmaraş'ta<br>Meydana Gelen<br>Deprem Hk. Basın<br>Bülteni-24 | Pazarcık                      | 0 | 1 | 0 | 2: 17   | 2: 29   |
| Kahramanmaraş'ta<br>Meydana Gelen<br>Deprem Hk. Basın<br>Bülteni-24 | Earthquake                    | 1 | 1 | 1 | 2: 48   | 2: 53   |
| Kahramanmaraş'ta<br>Meydana Gelen<br>Deprem Hk. Basın<br>Bülteni-24 | Earthquake                    | 1 | 1 | 1 | 2: 48   | 2: 53   |
| Kahramanmaraş'ta<br>Meydana Gelen<br>Deprem Hk. Basın<br>Bülteni-24 | AFAD                          | 1 | 1 | 1 | 2: 92   | 2: 95   |
| Kahramanmaraş'ta<br>Meydana Gelen<br>Deprem Hk. Basın<br>Bülteni-24 | AFAD                          | 1 | 1 | 1 | 2: 92   | 2: 95   |

|                                                                     |                               |   |   |   |        |        |
|---------------------------------------------------------------------|-------------------------------|---|---|---|--------|--------|
| Kahramanmaraş'ta<br>Meydana Gelen<br>Deprem Hk. Basın<br>Bülteni-24 | Earthquake                    | 1 | 1 | 1 | 2: 134 | 2: 139 |
| Kahramanmaraş'ta<br>Meydana Gelen<br>Deprem Hk. Basın<br>Bülteni-24 | Earthquake                    | 1 | 1 | 1 | 2: 134 | 2: 139 |
| Kahramanmaraş'ta<br>Meydana Gelen<br>Deprem Hk. Basın<br>Bülteni-24 | Disaster                      | 1 | 1 | 1 | 2: 194 | 2: 197 |
| Kahramanmaraş'ta<br>Meydana Gelen<br>Deprem Hk. Basın<br>Bülteni-24 | Disaster                      | 1 | 1 | 1 | 2: 194 | 2: 197 |
| Kahramanmaraş'ta<br>Meydana Gelen<br>Deprem Hk. Basın<br>Bülteni-24 | Coordination\Public relations | 1 | 1 | 1 | 2: 243 | 2: 248 |
| Kahramanmaraş'ta<br>Meydana Gelen<br>Deprem Hk. Basın<br>Bülteni-24 | Coordination\Public relations | 1 | 1 | 1 | 2: 243 | 2: 248 |
| Kahramanmaraş'ta<br>Meydana Gelen<br>Deprem Hk. Basın<br>Bülteni-24 | AFAD                          | 1 | 1 | 1 | 2: 283 | 2: 286 |
| Kahramanmaraş'ta<br>Meydana Gelen<br>Deprem Hk. Basın<br>Bülteni-24 | AFAD                          | 1 | 1 | 1 | 2: 283 | 2: 286 |
| Kahramanmaraş'ta<br>Meydana Gelen<br>Deprem Hk. Basın<br>Bülteni-24 | AFAD                          | 1 | 1 | 1 | 2: 341 | 2: 344 |
| Kahramanmaraş'ta<br>Meydana Gelen<br>Deprem Hk. Basın<br>Bülteni-24 | AFAD                          | 1 | 1 | 1 | 2: 341 | 2: 344 |
| Kahramanmaraş'ta<br>Meydana Gelen<br>Deprem Hk. Basın<br>Bülteni-24 | AFAD                          | 1 | 1 | 1 | 2: 458 | 2: 461 |
| Kahramanmaraş'ta<br>Meydana Gelen<br>Deprem Hk. Basın<br>Bülteni-24 | AFAD                          | 1 | 1 | 1 | 2: 458 | 2: 461 |
| Kahramanmaraş'ta<br>Meydana Gelen<br>Deprem Hk. Basın<br>Bülteni-24 | Response\Search&Rescue        | 1 | 1 | 1 | 2: 552 | 2: 565 |
| Kahramanmaraş'ta<br>Meydana Gelen<br>Deprem Hk. Basın<br>Bülteni-24 | Response\Search&Rescue        | 1 | 1 | 1 | 2: 552 | 2: 565 |
| Kahramanmaraş'ta<br>Meydana Gelen<br>Deprem Hk. Basın<br>Bülteni-24 | Disaster                      | 1 | 1 | 1 | 2: 616 | 2: 619 |
| Kahramanmaraş'ta<br>Meydana Gelen<br>Deprem Hk. Basın<br>Bülteni-24 | Disaster                      | 1 | 1 | 1 | 2: 616 | 2: 619 |
| Kahramanmaraş'ta<br>Meydana Gelen<br>Deprem Hk. Basın<br>Bülteni-24 | AFAD                          | 1 | 1 | 1 | 2: 634 | 2: 637 |
| Kahramanmaraş'ta<br>Meydana Gelen<br>Deprem Hk. Basın<br>Bülteni-24 | AFAD                          | 1 | 1 | 1 | 2: 634 | 2: 637 |
| Kahramanmaraş'ta<br>Meydana Gelen<br>Deprem Hk. Basın<br>Bülteni-24 | Preparedness\Preparedness     | 1 | 1 | 1 | 2: 698 | 2: 708 |
| Kahramanmaraş'ta<br>Meydana Gelen<br>Deprem Hk. Basın<br>Bülteni-24 | Preparedness\Preparedness     | 1 | 1 | 1 | 2: 698 | 2: 708 |

|                                                                     |                                 |   |   |   |         |         |
|---------------------------------------------------------------------|---------------------------------|---|---|---|---------|---------|
| Kahramanmaraş'ta<br>Meydana Gelen<br>Deprem Hk. Basın<br>Bülteni-24 | Disaster                        | 1 | 1 | 1 | 2: 698  | 2: 701  |
| Kahramanmaraş'ta<br>Meydana Gelen<br>Deprem Hk. Basın<br>Bülteni-24 | Disaster                        | 1 | 1 | 1 | 2: 698  | 2: 701  |
| Kahramanmaraş'ta<br>Meydana Gelen<br>Deprem Hk. Basın<br>Bülteni-24 | Disaster                        | 1 | 1 | 1 | 2: 746  | 2: 749  |
| Kahramanmaraş'ta<br>Meydana Gelen<br>Deprem Hk. Basın<br>Bülteni-24 | Disaster                        | 1 | 1 | 1 | 2: 746  | 2: 749  |
| Kahramanmaraş'ta<br>Meydana Gelen<br>Deprem Hk. Basın<br>Bülteni-24 | Recovery\Fund drive             | 1 | 1 | 1 | 2: 807  | 2: 825  |
| Kahramanmaraş'ta<br>Meydana Gelen<br>Deprem Hk. Basın<br>Bülteni-24 | Recovery\Fund drive             | 1 | 1 | 1 | 2: 807  | 2: 825  |
| Kahramanmaraş'ta<br>Meydana Gelen<br>Deprem Hk. Basın<br>Bülteni-24 | Coordination\Social media       | 1 | 0 | 0 | 2: 923  | 2: 934  |
| Kahramanmaraş'ta<br>Meydana Gelen<br>Deprem Hk. Basın<br>Bülteni-24 | Coordination\Social media usage | 0 | 1 | 0 | 2: 923  | 2: 934  |
| Kahramanmaraş'ta<br>Meydana Gelen<br>Deprem Hk. Basın<br>Bülteni-24 | AFAD                            | 1 | 1 | 1 | 2: 979  | 2: 982  |
| Kahramanmaraş'ta<br>Meydana Gelen<br>Deprem Hk. Basın<br>Bülteni-24 | AFAD                            | 1 | 1 | 1 | 2: 979  | 2: 982  |
| Kahramanmaraş'ta<br>Meydana Gelen<br>Deprem Hk. Basın<br>Bülteni-24 | AFAD                            | 1 | 1 | 1 | 2: 1001 | 2: 1004 |
| Kahramanmaraş'ta<br>Meydana Gelen<br>Deprem Hk. Basın<br>Bülteni-24 | AFAD                            | 1 | 1 | 1 | 2: 1001 | 2: 1004 |
| Kahramanmaraş'ta<br>Meydana Gelen<br>Deprem Hk. Basın<br>Bülteni-24 | Coordination\Information        | 1 | 1 | 1 | 2: 1046 | 2: 1057 |
| Kahramanmaraş'ta<br>Meydana Gelen<br>Deprem Hk. Basın<br>Bülteni-24 | Coordination\Information        | 1 | 1 | 1 | 2: 1046 | 2: 1057 |
| Kahramanmaraş'ta<br>Meydana Gelen<br>Deprem Hk. Basın<br>Bülteni-24 | Recovery\Peacemaking            | 1 | 1 | 1 | 2: 1062 | 2: 1071 |
| Kahramanmaraş'ta<br>Meydana Gelen<br>Deprem Hk. Basın<br>Bülteni-24 | Recovery\Peacemaking            | 1 | 1 | 1 | 2: 1062 | 2: 1071 |
| Kahramanmaraş'ta<br>Meydana Gelen<br>Deprem Hk. Basın<br>Bülteni-24 | Coordination\Social media       | 1 | 0 | 0 | 2: 1118 | 2: 1129 |
| Kahramanmaraş'ta<br>Meydana Gelen<br>Deprem Hk. Basın<br>Bülteni-24 | Coordination\Social media usage | 0 | 1 | 0 | 2: 1118 | 2: 1129 |
| Kahramanmaraş'ta<br>Meydana Gelen<br>Deprem Hk. Basın<br>Bülteni-24 | Disaster                        | 1 | 1 | 1 | 2: 1220 | 2: 1223 |
| Kahramanmaraş'ta<br>Meydana Gelen<br>Deprem Hk. Basın<br>Bülteni-24 | Disaster                        | 1 | 1 | 1 | 2: 1220 | 2: 1223 |



|                                                                     |               |   |   |   |         |         |
|---------------------------------------------------------------------|---------------|---|---|---|---------|---------|
| Kahramanmaraş'ta<br>Meydana Gelen<br>Deprem Hk. Basın<br>Bülteni-24 | Emergency     | 1 | 1 | 1 | 2: 1228 | 2: 1237 |
| Kahramanmaraş'ta<br>Meydana Gelen<br>Deprem Hk. Basın<br>Bülteni-24 | Emergency     | 1 | 1 | 1 | 2: 1228 | 2: 1237 |
| Kahramanmaraş'ta<br>Meydana Gelen<br>Deprem Hk. Basın<br>Bülteni-25 | Kahramanmaraş | 1 | 0 | 0 | 1: 17   | 1: 29   |
| Kahramanmaraş'ta<br>Meydana Gelen<br>Deprem Hk. Basın<br>Bülteni-25 | Pazarcık      | 0 | 1 | 0 | 1: 17   | 1: 29   |
| Kahramanmaraş'ta<br>Meydana Gelen<br>Deprem Hk. Basın<br>Bülteni-25 | Earthquake    | 1 | 1 | 1 | 1: 48   | 1: 53   |
| Kahramanmaraş'ta<br>Meydana Gelen<br>Deprem Hk. Basın<br>Bülteni-25 | Earthquake    | 1 | 1 | 1 | 1: 48   | 1: 53   |
| Kahramanmaraş'ta<br>Meydana Gelen<br>Deprem Hk. Basın<br>Bülteni-25 | AFAD          | 1 | 1 | 1 | 1: 92   | 1: 95   |
| Kahramanmaraş'ta<br>Meydana Gelen<br>Deprem Hk. Basın<br>Bülteni-25 | AFAD          | 1 | 1 | 1 | 1: 92   | 1: 95   |
| Kahramanmaraş'ta<br>Meydana Gelen<br>Deprem Hk. Basın<br>Bülteni-25 | Earthquake    | 1 | 1 | 1 | 1: 135  | 1: 140  |
| Kahramanmaraş'ta<br>Meydana Gelen<br>Deprem Hk. Basın<br>Bülteni-25 | Earthquake    | 1 | 1 | 1 | 1: 135  | 1: 140  |
| Kahramanmaraş'ta<br>Meydana Gelen<br>Deprem Hk. Basın<br>Bülteni-25 | Kahramanmaraş | 1 | 0 | 0 | 1: 170  | 1: 182  |
| Kahramanmaraş'ta<br>Meydana Gelen<br>Deprem Hk. Basın<br>Bülteni-25 | Pazarcık      | 0 | 1 | 0 | 1: 170  | 1: 182  |
| Kahramanmaraş'ta<br>Meydana Gelen<br>Deprem Hk. Basın<br>Bülteni-25 | Earthquake    | 1 | 1 | 1 | 1: 201  | 1: 206  |
| Kahramanmaraş'ta<br>Meydana Gelen<br>Deprem Hk. Basın<br>Bülteni-25 | Earthquake    | 1 | 1 | 1 | 1: 201  | 1: 206  |
| Kahramanmaraş'ta<br>Meydana Gelen<br>Deprem Hk. Basın<br>Bülteni-25 | Kahramanmaraş | 1 | 0 | 0 | 1: 283  | 1: 295  |
| Kahramanmaraş'ta<br>Meydana Gelen<br>Deprem Hk. Basın<br>Bülteni-25 | Pazarcık      | 0 | 1 | 0 | 1: 283  | 1: 295  |
| Kahramanmaraş'ta<br>Meydana Gelen<br>Deprem Hk. Basın<br>Bülteni-25 | Earthquake    | 1 | 1 | 1 | 1: 314  | 1: 319  |
| Kahramanmaraş'ta<br>Meydana Gelen<br>Deprem Hk. Basın<br>Bülteni-25 | Earthquake    | 1 | 1 | 1 | 1: 314  | 1: 319  |
| Kahramanmaraş'ta<br>Meydana Gelen<br>Deprem Hk. Basın<br>Bülteni-25 | Kahramanmaraş | 1 | 0 | 0 | 1: 380  | 1: 392  |
| Kahramanmaraş'ta<br>Meydana Gelen<br>Deprem Hk. Basın<br>Bülteni-25 | Pazarcık      | 0 | 1 | 0 | 1: 380  | 1: 392  |

|                                                                     |                           |   |   |   |        |        |
|---------------------------------------------------------------------|---------------------------|---|---|---|--------|--------|
| Kahramanmaraş'ta<br>Meydana Gelen<br>Deprem Hk. Basın<br>Bülteni-25 | Earthquake                | 1 | 1 | 1 | 1: 474 | 1: 479 |
| Kahramanmaraş'ta<br>Meydana Gelen<br>Deprem Hk. Basın<br>Bülteni-25 | Earthquake                | 1 | 1 | 1 | 1: 474 | 1: 479 |
| Kahramanmaraş'ta<br>Meydana Gelen<br>Deprem Hk. Basın<br>Bülteni-25 | Earthquake                | 1 | 1 | 1 | 1: 501 | 1: 506 |
| Kahramanmaraş'ta<br>Meydana Gelen<br>Deprem Hk. Basın<br>Bülteni-25 | Earthquake                | 1 | 1 | 1 | 1: 501 | 1: 506 |
| Kahramanmaraş'ta<br>Meydana Gelen<br>Deprem Hk. Basın<br>Bülteni-25 | Earthquake                | 1 | 1 | 1 | 1: 534 | 1: 539 |
| Kahramanmaraş'ta<br>Meydana Gelen<br>Deprem Hk. Basın<br>Bülteni-25 | Earthquake                | 1 | 1 | 1 | 1: 534 | 1: 539 |
| Kahramanmaraş'ta<br>Meydana Gelen<br>Deprem Hk. Basın<br>Bülteni-25 | Kahramanmaraş             | 1 | 0 | 0 | 1: 597 | 1: 609 |
| Kahramanmaraş'ta<br>Meydana Gelen<br>Deprem Hk. Basın<br>Bülteni-25 | Pazarcık                  | 0 | 1 | 0 | 1: 597 | 1: 609 |
| Kahramanmaraş'ta<br>Meydana Gelen<br>Deprem Hk. Basın<br>Bülteni-25 | Disaster                  | 1 | 1 | 1 | 1: 806 | 1: 809 |
| Kahramanmaraş'ta<br>Meydana Gelen<br>Deprem Hk. Basın<br>Bülteni-25 | Disaster                  | 1 | 1 | 1 | 1: 806 | 1: 809 |
| Kahramanmaraş'ta<br>Meydana Gelen<br>Deprem Hk. Basın<br>Bülteni-25 | Shelter&meal\Evacuation   | 1 | 1 | 1 | 1: 839 | 1: 845 |
| Kahramanmaraş'ta<br>Meydana Gelen<br>Deprem Hk. Basın<br>Bülteni-25 | Shelter&meal\Evacuation   | 1 | 1 | 1 | 1: 839 | 1: 845 |
| Kahramanmaraş'ta<br>Meydana Gelen<br>Deprem Hk. Basın<br>Bülteni-25 | AFAD                      | 1 | 1 | 1 | 1: 869 | 1: 872 |
| Kahramanmaraş'ta<br>Meydana Gelen<br>Deprem Hk. Basın<br>Bülteni-25 | AFAD                      | 1 | 1 | 1 | 1: 869 | 1: 872 |
| Kahramanmaraş'ta<br>Meydana Gelen<br>Deprem Hk. Basın<br>Bülteni-25 | Response\Coast guard&Navy | 1 | 1 | 1 | 1: 898 | 1: 911 |
| Kahramanmaraş'ta<br>Meydana Gelen<br>Deprem Hk. Basın<br>Bülteni-25 | Response\Coast guard&Navy | 1 | 1 | 1 | 1: 898 | 1: 911 |
| Kahramanmaraş'ta<br>Meydana Gelen<br>Deprem Hk. Basın<br>Bülteni-25 | Response\Number of staff  | 1 | 0 | 0 | 1: 975 | 1: 997 |
| Kahramanmaraş'ta<br>Meydana Gelen<br>Deprem Hk. Basın<br>Bülteni-25 | Response\Search&Rescue    | 1 | 1 | 1 | 1: 975 | 1: 988 |
| Kahramanmaraş'ta<br>Meydana Gelen<br>Deprem Hk. Basın<br>Bülteni-25 | Response\Search&Rescue    | 1 | 1 | 1 | 1: 975 | 1: 988 |
| Kahramanmaraş'ta<br>Meydana Gelen<br>Deprem Hk. Basın<br>Bülteni-25 | Response\Number           | 0 | 1 | 0 | 1: 975 | 1: 997 |

|                                                                     |                          |   |   |   |         |         |
|---------------------------------------------------------------------|--------------------------|---|---|---|---------|---------|
| Kahramanmaraş'ta<br>Meydana Gelen<br>Deprem Hk. Basın<br>Bülteni-25 | Response\Number of staff | 1 | 0 | 0 | 1: 1026 | 1: 1048 |
| Kahramanmaraş'ta<br>Meydana Gelen<br>Deprem Hk. Basın<br>Bülteni-25 | Response\Search&Rescue   | 1 | 1 | 1 | 1: 1026 | 1: 1039 |
| Kahramanmaraş'ta<br>Meydana Gelen<br>Deprem Hk. Basın<br>Bülteni-25 | Response\Search&Rescue   | 1 | 1 | 1 | 1: 1026 | 1: 1039 |
| Kahramanmaraş'ta<br>Meydana Gelen<br>Deprem Hk. Basın<br>Bülteni-25 | Response\Number          | 0 | 1 | 0 | 1: 1026 | 1: 1048 |
| Kahramanmaraş'ta<br>Meydana Gelen<br>Deprem Hk. Basın<br>Bülteni-25 | Response\Number of staff | 1 | 0 | 0 | 1: 1149 | 1: 1171 |
| Kahramanmaraş'ta<br>Meydana Gelen<br>Deprem Hk. Basın<br>Bülteni-25 | Response\Search&Rescue   | 1 | 1 | 1 | 1: 1149 | 1: 1162 |
| Kahramanmaraş'ta<br>Meydana Gelen<br>Deprem Hk. Basın<br>Bülteni-25 | Response\Search&Rescue   | 1 | 1 | 1 | 1: 1149 | 1: 1162 |
| Kahramanmaraş'ta<br>Meydana Gelen<br>Deprem Hk. Basın<br>Bülteni-25 | Response\Number          | 0 | 1 | 0 | 1: 1149 | 1: 1171 |
| Kahramanmaraş'ta<br>Meydana Gelen<br>Deprem Hk. Basın<br>Bülteni-25 | AFAD                     | 1 | 1 | 1 | 1: 1200 | 1: 1203 |
| Kahramanmaraş'ta<br>Meydana Gelen<br>Deprem Hk. Basın<br>Bülteni-25 | AFAD                     | 1 | 1 | 1 | 1: 1200 | 1: 1203 |
| Kahramanmaraş'ta<br>Meydana Gelen<br>Deprem Hk. Basın<br>Bülteni-25 | Response\Military        | 1 | 1 | 1 | 1: 1215 | 1: 1222 |
| Kahramanmaraş'ta<br>Meydana Gelen<br>Deprem Hk. Basın<br>Bülteni-25 | Response\Military        | 1 | 1 | 1 | 1: 1215 | 1: 1222 |
| Kahramanmaraş'ta<br>Meydana Gelen<br>Deprem Hk. Basın<br>Bülteni-25 | Response\Number of staff | 1 | 0 | 0 | 1: 1334 | 1: 1348 |
| Kahramanmaraş'ta<br>Meydana Gelen<br>Deprem Hk. Basın<br>Bülteni-25 | Response\Number          | 0 | 1 | 0 | 1: 1334 | 1: 1348 |
| Kahramanmaraş'ta<br>Meydana Gelen<br>Deprem Hk. Basın<br>Bülteni-25 | Disaster                 | 1 | 1 | 1 | 1: 1420 | 1: 1423 |
| Kahramanmaraş'ta<br>Meydana Gelen<br>Deprem Hk. Basın<br>Bülteni-25 | Disaster                 | 1 | 1 | 1 | 1: 1420 | 1: 1423 |
| Kahramanmaraş'ta<br>Meydana Gelen<br>Deprem Hk. Basın<br>Bülteni-25 | Disaster                 | 1 | 1 | 1 | 1: 1585 | 1: 1588 |
| Kahramanmaraş'ta<br>Meydana Gelen<br>Deprem Hk. Basın<br>Bülteni-25 | Disaster                 | 1 | 1 | 1 | 1: 1585 | 1: 1588 |
| Kahramanmaraş'ta<br>Meydana Gelen<br>Deprem Hk. Basın<br>Bülteni-25 | AFAD                     | 1 | 1 | 1 | 1: 1639 | 1: 1642 |
| Kahramanmaraş'ta<br>Meydana Gelen<br>Deprem Hk. Basın<br>Bülteni-25 | AFAD                     | 1 | 1 | 1 | 1: 1639 | 1: 1642 |

|                                                                     |                           |   |   |   |         |         |
|---------------------------------------------------------------------|---------------------------|---|---|---|---------|---------|
| Kahramanmaraş'ta<br>Meydana Gelen<br>Deprem Hk. Basın<br>Bülteni-25 | Response\Coast guard&Navy | 1 | 1 | 1 | 1: 1733 | 1: 1746 |
| Kahramanmaraş'ta<br>Meydana Gelen<br>Deprem Hk. Basın<br>Bülteni-25 | Response\Coast guard&Navy | 1 | 1 | 1 | 1: 1733 | 1: 1746 |
| Kahramanmaraş'ta<br>Meydana Gelen<br>Deprem Hk. Basın<br>Bülteni-25 | Response\Military         | 1 | 1 | 1 | 1: 1751 | 1: 1758 |
| Kahramanmaraş'ta<br>Meydana Gelen<br>Deprem Hk. Basın<br>Bülteni-25 | Response\Military         | 1 | 1 | 1 | 1: 1751 | 1: 1758 |
| Kahramanmaraş'ta<br>Meydana Gelen<br>Deprem Hk. Basın<br>Bülteni-25 | Shelter&meal\Evacuation   | 1 | 1 | 1 | 1: 1957 | 1: 1963 |
| Kahramanmaraş'ta<br>Meydana Gelen<br>Deprem Hk. Basın<br>Bülteni-25 | Shelter&meal\Evacuation   | 1 | 1 | 1 | 1: 1957 | 1: 1963 |
| Kahramanmaraş'ta<br>Meydana Gelen<br>Deprem Hk. Basın<br>Bülteni-25 | Response\Coast guard&Navy | 1 | 1 | 1 | 1: 1974 | 1: 1989 |
| Kahramanmaraş'ta<br>Meydana Gelen<br>Deprem Hk. Basın<br>Bülteni-25 | Response\Coast guard&Navy | 1 | 1 | 1 | 1: 1974 | 1: 1989 |
| Kahramanmaraş'ta<br>Meydana Gelen<br>Deprem Hk. Basın<br>Bülteni-25 | Response\Coast guard&Navy | 1 | 1 | 1 | 1: 2018 | 1: 2031 |
| Kahramanmaraş'ta<br>Meydana Gelen<br>Deprem Hk. Basın<br>Bülteni-25 | Response\Coast guard&Navy | 1 | 1 | 1 | 1: 2018 | 1: 2031 |
| Kahramanmaraş'ta<br>Meydana Gelen<br>Deprem Hk. Basın<br>Bülteni-25 | Disaster                  | 1 | 1 | 1 | 1: 2108 | 1: 2111 |
| Kahramanmaraş'ta<br>Meydana Gelen<br>Deprem Hk. Basın<br>Bülteni-25 | Disaster                  | 1 | 1 | 1 | 1: 2108 | 1: 2111 |
| Kahramanmaraş'ta<br>Meydana Gelen<br>Deprem Hk. Basın<br>Bülteni-25 | Shelter&meal\Sheltering   | 1 | 1 | 1 | 1: 2113 | 1: 2119 |
| Kahramanmaraş'ta<br>Meydana Gelen<br>Deprem Hk. Basın<br>Bülteni-25 | Shelter&meal\Sheltering   | 1 | 1 | 1 | 1: 2113 | 1: 2119 |
| Kahramanmaraş'ta<br>Meydana Gelen<br>Deprem Hk. Basın<br>Bülteni-25 | Earthquake                | 1 | 1 | 1 | 1: 2128 | 1: 2133 |
| Kahramanmaraş'ta<br>Meydana Gelen<br>Deprem Hk. Basın<br>Bülteni-25 | Earthquake                | 1 | 1 | 1 | 1: 2128 | 1: 2133 |
| Kahramanmaraş'ta<br>Meydana Gelen<br>Deprem Hk. Basın<br>Bülteni-25 | AFAD                      | 1 | 1 | 1 | 1: 2174 | 1: 2177 |
| Kahramanmaraş'ta<br>Meydana Gelen<br>Deprem Hk. Basın<br>Bülteni-25 | AFAD                      | 1 | 1 | 1 | 1: 2174 | 1: 2177 |
| Kahramanmaraş'ta<br>Meydana Gelen<br>Deprem Hk. Basın<br>Bülteni-25 | Response\Welfare service  | 1 | 1 | 1 | 1: 2188 | 1: 2200 |
| Kahramanmaraş'ta<br>Meydana Gelen<br>Deprem Hk. Basın<br>Bülteni-25 | Response\Welfare service  | 1 | 1 | 1 | 1: 2188 | 1: 2200 |

|                                                                     |                               |   |   |   |         |         |
|---------------------------------------------------------------------|-------------------------------|---|---|---|---------|---------|
| Kahramanmaraş'ta<br>Meydana Gelen<br>Deprem Hk. Basın<br>Bülteni-25 | Shelter&meal\Tent             | 1 | 1 | 1 | 1: 2274 | 1: 2278 |
| Kahramanmaraş'ta<br>Meydana Gelen<br>Deprem Hk. Basın<br>Bülteni-25 | Shelter&meal\Tent             | 1 | 1 | 1 | 1: 2274 | 1: 2278 |
| Kahramanmaraş'ta<br>Meydana Gelen<br>Deprem Hk. Basın<br>Bülteni-25 | Shelter&meal\Tent             | 1 | 1 | 1 | 1: 2338 | 1: 2342 |
| Kahramanmaraş'ta<br>Meydana Gelen<br>Deprem Hk. Basın<br>Bülteni-25 | Shelter&meal\Tent             | 1 | 1 | 1 | 1: 2338 | 1: 2342 |
| Kahramanmaraş'ta<br>Meydana Gelen<br>Deprem Hk. Basın<br>Bülteni-25 | Disaster                      | 1 | 1 | 1 | 1: 2373 | 1: 2376 |
| Kahramanmaraş'ta<br>Meydana Gelen<br>Deprem Hk. Basın<br>Bülteni-25 | Disaster                      | 1 | 1 | 1 | 1: 2373 | 1: 2376 |
| Kahramanmaraş'ta<br>Meydana Gelen<br>Deprem Hk. Basın<br>Bülteni-25 | AFAD                          | 1 | 1 | 1 | 1: 2403 | 1: 2406 |
| Kahramanmaraş'ta<br>Meydana Gelen<br>Deprem Hk. Basın<br>Bülteni-25 | AFAD                          | 1 | 1 | 1 | 1: 2403 | 1: 2406 |
| Kahramanmaraş'ta<br>Meydana Gelen<br>Deprem Hk. Basın<br>Bülteni-25 | Response\Military             | 1 | 1 | 1 | 1: 2414 | 1: 2421 |
| Kahramanmaraş'ta<br>Meydana Gelen<br>Deprem Hk. Basın<br>Bülteni-25 | Response\Military             | 1 | 1 | 1 | 1: 2414 | 1: 2421 |
| Kahramanmaraş'ta<br>Meydana Gelen<br>Deprem Hk. Basın<br>Bülteni-25 | Coordination\NGO              | 1 | 1 | 1 | 1: 2426 | 1: 2437 |
| Kahramanmaraş'ta<br>Meydana Gelen<br>Deprem Hk. Basın<br>Bülteni-25 | Coordination\NGO              | 1 | 1 | 1 | 1: 2426 | 1: 2437 |
| Kahramanmaraş'ta<br>Meydana Gelen<br>Deprem Hk. Basın<br>Bülteni-25 | Shelter&meal\Mobile kitchen   | 1 | 1 | 1 | 1: 2517 | 1: 2528 |
| Kahramanmaraş'ta<br>Meydana Gelen<br>Deprem Hk. Basın<br>Bülteni-25 | Shelter&meal\Mobile kitchen   | 1 | 1 | 1 | 1: 2517 | 1: 2528 |
| Kahramanmaraş'ta<br>Meydana Gelen<br>Deprem Hk. Basın<br>Bülteni-25 | Disaster                      | 1 | 1 | 1 | 1: 2609 | 1: 2612 |
| Kahramanmaraş'ta<br>Meydana Gelen<br>Deprem Hk. Basın<br>Bülteni-25 | Disaster                      | 1 | 1 | 1 | 1: 2609 | 1: 2612 |
| Kahramanmaraş'ta<br>Meydana Gelen<br>Deprem Hk. Basın<br>Bülteni-25 | Disaster                      | 1 | 1 | 1 | 1: 2786 | 1: 2789 |
| Kahramanmaraş'ta<br>Meydana Gelen<br>Deprem Hk. Basın<br>Bülteni-25 | Disaster                      | 1 | 1 | 1 | 1: 2786 | 1: 2789 |
| Kahramanmaraş'ta<br>Meydana Gelen<br>Deprem Hk. Basın<br>Bülteni-25 | Response\Psychosocial support | 1 | 1 | 1 | 1: 2791 | 1: 2800 |
| Kahramanmaraş'ta<br>Meydana Gelen<br>Deprem Hk. Basın<br>Bülteni-25 | Response\Psychosocial support | 1 | 1 | 1 | 1: 2791 | 1: 2800 |

|                                                                     |                               |   |   |   |         |         |
|---------------------------------------------------------------------|-------------------------------|---|---|---|---------|---------|
| Kahramanmaraş'ta<br>Meydana Gelen<br>Deprem Hk. Basın<br>Bülteni-25 | Response\Welfare service      | 1 | 1 | 1 | 1: 2824 | 1: 2836 |
| Kahramanmaraş'ta<br>Meydana Gelen<br>Deprem Hk. Basın<br>Bülteni-25 | Response\Welfare service      | 1 | 1 | 1 | 1: 2824 | 1: 2836 |
| Kahramanmaraş'ta<br>Meydana Gelen<br>Deprem Hk. Basın<br>Bülteni-25 | Kahramanmaraş                 | 1 | 0 | 0 | 1: 2847 | 1: 2859 |
| Kahramanmaraş'ta<br>Meydana Gelen<br>Deprem Hk. Basın<br>Bülteni-25 | Pazarcık                      | 0 | 1 | 0 | 1: 2847 | 1: 2859 |
| Kahramanmaraş'ta<br>Meydana Gelen<br>Deprem Hk. Basın<br>Bülteni-25 | Earthquake                    | 1 | 1 | 1 | 1: 2972 | 1: 2977 |
| Kahramanmaraş'ta<br>Meydana Gelen<br>Deprem Hk. Basın<br>Bülteni-25 | Earthquake                    | 1 | 1 | 1 | 1: 2972 | 1: 2977 |
| Kahramanmaraş'ta<br>Meydana Gelen<br>Deprem Hk. Basın<br>Bülteni-25 | Earthquake                    | 1 | 1 | 1 | 1: 2998 | 1: 3003 |
| Kahramanmaraş'ta<br>Meydana Gelen<br>Deprem Hk. Basın<br>Bülteni-25 | Earthquake                    | 1 | 1 | 1 | 1: 2998 | 1: 3003 |
| Kahramanmaraş'ta<br>Meydana Gelen<br>Deprem Hk. Basın<br>Bülteni-25 | Response\Psychosocial support | 1 | 1 | 1 | 1: 3063 | 1: 3073 |
| Kahramanmaraş'ta<br>Meydana Gelen<br>Deprem Hk. Basın<br>Bülteni-25 | Response\Psychosocial support | 1 | 1 | 1 | 1: 3063 | 1: 3073 |
| Kahramanmaraş'ta<br>Meydana Gelen<br>Deprem Hk. Basın<br>Bülteni-25 | Kahramanmaraş                 | 1 | 0 | 0 | 2: 17   | 2: 29   |
| Kahramanmaraş'ta<br>Meydana Gelen<br>Deprem Hk. Basın<br>Bülteni-25 | Pazarcık                      | 0 | 1 | 0 | 2: 17   | 2: 29   |
| Kahramanmaraş'ta<br>Meydana Gelen<br>Deprem Hk. Basın<br>Bülteni-25 | Earthquake                    | 1 | 1 | 1 | 2: 48   | 2: 53   |
| Kahramanmaraş'ta<br>Meydana Gelen<br>Deprem Hk. Basın<br>Bülteni-25 | Earthquake                    | 1 | 1 | 1 | 2: 48   | 2: 53   |
| Kahramanmaraş'ta<br>Meydana Gelen<br>Deprem Hk. Basın<br>Bülteni-25 | AFAD                          | 1 | 1 | 1 | 2: 92   | 2: 95   |
| Kahramanmaraş'ta<br>Meydana Gelen<br>Deprem Hk. Basın<br>Bülteni-25 | AFAD                          | 1 | 1 | 1 | 2: 92   | 2: 95   |
| Kahramanmaraş'ta<br>Meydana Gelen<br>Deprem Hk. Basın<br>Bülteni-25 | Earthquake                    | 1 | 1 | 1 | 2: 135  | 2: 140  |
| Kahramanmaraş'ta<br>Meydana Gelen<br>Deprem Hk. Basın<br>Bülteni-25 | Earthquake                    | 1 | 1 | 1 | 2: 135  | 2: 140  |
| Kahramanmaraş'ta<br>Meydana Gelen<br>Deprem Hk. Basın<br>Bülteni-25 | Disaster                      | 1 | 1 | 1 | 2: 195  | 2: 198  |
| Kahramanmaraş'ta<br>Meydana Gelen<br>Deprem Hk. Basın<br>Bülteni-25 | Disaster                      | 1 | 1 | 1 | 2: 195  | 2: 198  |

|                                                                     |                               |   |   |   |        |        |
|---------------------------------------------------------------------|-------------------------------|---|---|---|--------|--------|
| Kahramanmaraş'ta<br>Meydana Gelen<br>Deprem Hk. Basın<br>Bülteni-25 | Coordination\Public relations | 1 | 1 | 1 | 2: 244 | 2: 249 |
| Kahramanmaraş'ta<br>Meydana Gelen<br>Deprem Hk. Basın<br>Bülteni-25 | Coordination\Public relations | 1 | 1 | 1 | 2: 244 | 2: 249 |
| Kahramanmaraş'ta<br>Meydana Gelen<br>Deprem Hk. Basın<br>Bülteni-25 | AFAD                          | 1 | 1 | 1 | 2: 284 | 2: 287 |
| Kahramanmaraş'ta<br>Meydana Gelen<br>Deprem Hk. Basın<br>Bülteni-25 | AFAD                          | 1 | 1 | 1 | 2: 284 | 2: 287 |
| Kahramanmaraş'ta<br>Meydana Gelen<br>Deprem Hk. Basın<br>Bülteni-25 | AFAD                          | 1 | 1 | 1 | 2: 342 | 2: 345 |
| Kahramanmaraş'ta<br>Meydana Gelen<br>Deprem Hk. Basın<br>Bülteni-25 | AFAD                          | 1 | 1 | 1 | 2: 342 | 2: 345 |
| Kahramanmaraş'ta<br>Meydana Gelen<br>Deprem Hk. Basın<br>Bülteni-25 | AFAD                          | 1 | 1 | 1 | 2: 459 | 2: 462 |
| Kahramanmaraş'ta<br>Meydana Gelen<br>Deprem Hk. Basın<br>Bülteni-25 | AFAD                          | 1 | 1 | 1 | 2: 459 | 2: 462 |
| Kahramanmaraş'ta<br>Meydana Gelen<br>Deprem Hk. Basın<br>Bülteni-25 | Response\Search&Rescue        | 1 | 1 | 1 | 2: 553 | 2: 566 |
| Kahramanmaraş'ta<br>Meydana Gelen<br>Deprem Hk. Basın<br>Bülteni-25 | Response\Search&Rescue        | 1 | 1 | 1 | 2: 553 | 2: 566 |
| Kahramanmaraş'ta<br>Meydana Gelen<br>Deprem Hk. Basın<br>Bülteni-25 | Disaster                      | 1 | 1 | 1 | 2: 617 | 2: 620 |
| Kahramanmaraş'ta<br>Meydana Gelen<br>Deprem Hk. Basın<br>Bülteni-25 | Disaster                      | 1 | 1 | 1 | 2: 617 | 2: 620 |
| Kahramanmaraş'ta<br>Meydana Gelen<br>Deprem Hk. Basın<br>Bülteni-25 | AFAD                          | 1 | 1 | 1 | 2: 635 | 2: 638 |
| Kahramanmaraş'ta<br>Meydana Gelen<br>Deprem Hk. Basın<br>Bülteni-25 | AFAD                          | 1 | 1 | 1 | 2: 635 | 2: 638 |
| Kahramanmaraş'ta<br>Meydana Gelen<br>Deprem Hk. Basın<br>Bülteni-25 | Preparedness\Preparedness     | 1 | 1 | 1 | 2: 699 | 2: 709 |
| Kahramanmaraş'ta<br>Meydana Gelen<br>Deprem Hk. Basın<br>Bülteni-25 | Preparedness\Preparedness     | 1 | 1 | 1 | 2: 699 | 2: 709 |
| Kahramanmaraş'ta<br>Meydana Gelen<br>Deprem Hk. Basın<br>Bülteni-25 | Disaster                      | 1 | 1 | 1 | 2: 699 | 2: 702 |
| Kahramanmaraş'ta<br>Meydana Gelen<br>Deprem Hk. Basın<br>Bülteni-25 | Disaster                      | 1 | 1 | 1 | 2: 699 | 2: 702 |
| Kahramanmaraş'ta<br>Meydana Gelen<br>Deprem Hk. Basın<br>Bülteni-25 | Disaster                      | 1 | 1 | 1 | 2: 747 | 2: 750 |
| Kahramanmaraş'ta<br>Meydana Gelen<br>Deprem Hk. Basın<br>Bülteni-25 | Disaster                      | 1 | 1 | 1 | 2: 747 | 2: 750 |

|                                                                     |                                 |   |   |   |         |         |
|---------------------------------------------------------------------|---------------------------------|---|---|---|---------|---------|
| Kahramanmaraş'ta<br>Meydana Gelen<br>Deprem Hk. Basın<br>Bülteni-25 | Recovery\Fund drive             | 1 | 1 | 1 | 2: 808  | 2: 826  |
| Kahramanmaraş'ta<br>Meydana Gelen<br>Deprem Hk. Basın<br>Bülteni-25 | Recovery\Fund drive             | 1 | 1 | 1 | 2: 808  | 2: 826  |
| Kahramanmaraş'ta<br>Meydana Gelen<br>Deprem Hk. Basın<br>Bülteni-25 | Coordination\Social media       | 1 | 0 | 0 | 2: 924  | 2: 935  |
| Kahramanmaraş'ta<br>Meydana Gelen<br>Deprem Hk. Basın<br>Bülteni-25 | Coordination\Social media usage | 0 | 1 | 0 | 2: 924  | 2: 935  |
| Kahramanmaraş'ta<br>Meydana Gelen<br>Deprem Hk. Basın<br>Bülteni-25 | AFAD                            | 1 | 1 | 1 | 2: 980  | 2: 983  |
| Kahramanmaraş'ta<br>Meydana Gelen<br>Deprem Hk. Basın<br>Bülteni-25 | AFAD                            | 1 | 1 | 1 | 2: 980  | 2: 983  |
| Kahramanmaraş'ta<br>Meydana Gelen<br>Deprem Hk. Basın<br>Bülteni-25 | AFAD                            | 1 | 1 | 1 | 2: 1002 | 2: 1005 |
| Kahramanmaraş'ta<br>Meydana Gelen<br>Deprem Hk. Basın<br>Bülteni-25 | AFAD                            | 1 | 1 | 1 | 2: 1002 | 2: 1005 |
| Kahramanmaraş'ta<br>Meydana Gelen<br>Deprem Hk. Basın<br>Bülteni-25 | Coordination\Information        | 1 | 1 | 1 | 2: 1047 | 2: 1058 |
| Kahramanmaraş'ta<br>Meydana Gelen<br>Deprem Hk. Basın<br>Bülteni-25 | Coordination\Information        | 1 | 1 | 1 | 2: 1047 | 2: 1058 |
| Kahramanmaraş'ta<br>Meydana Gelen<br>Deprem Hk. Basın<br>Bülteni-25 | Recovery\Peacemaking            | 1 | 1 | 1 | 2: 1063 | 2: 1072 |
| Kahramanmaraş'ta<br>Meydana Gelen<br>Deprem Hk. Basın<br>Bülteni-25 | Recovery\Peacemaking            | 1 | 1 | 1 | 2: 1063 | 2: 1072 |
| Kahramanmaraş'ta<br>Meydana Gelen<br>Deprem Hk. Basın<br>Bülteni-25 | Coordination\Social media       | 1 | 0 | 0 | 2: 1119 | 2: 1130 |
| Kahramanmaraş'ta<br>Meydana Gelen<br>Deprem Hk. Basın<br>Bülteni-25 | Coordination\Social media usage | 0 | 1 | 0 | 2: 1119 | 2: 1130 |
| Kahramanmaraş'ta<br>Meydana Gelen<br>Deprem Hk. Basın<br>Bülteni-25 | Disaster                        | 1 | 1 | 1 | 2: 1221 | 2: 1224 |
| Kahramanmaraş'ta<br>Meydana Gelen<br>Deprem Hk. Basın<br>Bülteni-25 | Disaster                        | 1 | 1 | 1 | 2: 1221 | 2: 1224 |
| Kahramanmaraş'ta<br>Meydana Gelen<br>Deprem Hk. Basın<br>Bülteni-25 | Emergency                       | 1 | 1 | 1 | 2: 1229 | 2: 1238 |
| Kahramanmaraş'ta<br>Meydana Gelen<br>Deprem Hk. Basın<br>Bülteni-25 | Emergency                       | 1 | 1 | 1 | 2: 1229 | 2: 1238 |
| Kahramanmaraş'ta<br>Meydana Gelen<br>Deprem Hk. Basın<br>Bülteni-29 | Kahramanmaraş                   | 1 | 0 | 0 | 1: 17   | 1: 29   |
| Kahramanmaraş'ta<br>Meydana Gelen<br>Deprem Hk. Basın<br>Bülteni-29 | Pazarcık                        | 0 | 1 | 0 | 1: 17   | 1: 29   |



|                                                                     |               |   |   |   |        |        |
|---------------------------------------------------------------------|---------------|---|---|---|--------|--------|
| Kahramanmaraş'ta<br>Meydana Gelen<br>Deprem Hk. Basın<br>Bülteni-29 | Earthquake    | 1 | 1 | 1 | 1: 48  | 1: 53  |
| Kahramanmaraş'ta<br>Meydana Gelen<br>Deprem Hk. Basın<br>Bülteni-29 | Earthquake    | 1 | 1 | 1 | 1: 48  | 1: 53  |
| Kahramanmaraş'ta<br>Meydana Gelen<br>Deprem Hk. Basın<br>Bülteni-29 | AFAD          | 1 | 1 | 1 | 1: 92  | 1: 95  |
| Kahramanmaraş'ta<br>Meydana Gelen<br>Deprem Hk. Basın<br>Bülteni-29 | AFAD          | 1 | 1 | 1 | 1: 92  | 1: 95  |
| Kahramanmaraş'ta<br>Meydana Gelen<br>Deprem Hk. Basın<br>Bülteni-29 | Earthquake    | 1 | 1 | 1 | 1: 134 | 1: 139 |
| Kahramanmaraş'ta<br>Meydana Gelen<br>Deprem Hk. Basın<br>Bülteni-29 | Earthquake    | 1 | 1 | 1 | 1: 134 | 1: 139 |
| Kahramanmaraş'ta<br>Meydana Gelen<br>Deprem Hk. Basın<br>Bülteni-29 | Kahramanmaraş | 1 | 0 | 0 | 1: 168 | 1: 180 |
| Kahramanmaraş'ta<br>Meydana Gelen<br>Deprem Hk. Basın<br>Bülteni-29 | Pazarcık      | 0 | 1 | 0 | 1: 168 | 1: 180 |
| Kahramanmaraş'ta<br>Meydana Gelen<br>Deprem Hk. Basın<br>Bülteni-29 | Earthquake    | 1 | 1 | 1 | 1: 199 | 1: 204 |
| Kahramanmaraş'ta<br>Meydana Gelen<br>Deprem Hk. Basın<br>Bülteni-29 | Earthquake    | 1 | 1 | 1 | 1: 199 | 1: 204 |
| Kahramanmaraş'ta<br>Meydana Gelen<br>Deprem Hk. Basın<br>Bülteni-29 | Kahramanmaraş | 1 | 0 | 0 | 1: 281 | 1: 293 |
| Kahramanmaraş'ta<br>Meydana Gelen<br>Deprem Hk. Basın<br>Bülteni-29 | Pazarcık      | 0 | 1 | 0 | 1: 281 | 1: 293 |
| Kahramanmaraş'ta<br>Meydana Gelen<br>Deprem Hk. Basın<br>Bülteni-29 | Earthquake    | 1 | 1 | 1 | 1: 312 | 1: 317 |
| Kahramanmaraş'ta<br>Meydana Gelen<br>Deprem Hk. Basın<br>Bülteni-29 | Earthquake    | 1 | 1 | 1 | 1: 312 | 1: 317 |
| Kahramanmaraş'ta<br>Meydana Gelen<br>Deprem Hk. Basın<br>Bülteni-29 | Kahramanmaraş | 1 | 0 | 0 | 1: 378 | 1: 390 |
| Kahramanmaraş'ta<br>Meydana Gelen<br>Deprem Hk. Basın<br>Bülteni-29 | Pazarcık      | 0 | 1 | 0 | 1: 378 | 1: 390 |
| Kahramanmaraş'ta<br>Meydana Gelen<br>Deprem Hk. Basın<br>Bülteni-29 | Earthquake    | 1 | 1 | 1 | 1: 473 | 1: 478 |
| Kahramanmaraş'ta<br>Meydana Gelen<br>Deprem Hk. Basın<br>Bülteni-29 | Earthquake    | 1 | 1 | 1 | 1: 473 | 1: 478 |
| Kahramanmaraş'ta<br>Meydana Gelen<br>Deprem Hk. Basın<br>Bülteni-29 | Earthquake    | 1 | 1 | 1 | 1: 500 | 1: 505 |
| Kahramanmaraş'ta<br>Meydana Gelen<br>Deprem Hk. Basın<br>Bülteni-29 | Earthquake    | 1 | 1 | 1 | 1: 500 | 1: 505 |

|                                                                     |                           |   |   |   |        |         |
|---------------------------------------------------------------------|---------------------------|---|---|---|--------|---------|
| Kahramanmaraş'ta<br>Meydana Gelen<br>Deprem Hk. Basın<br>Bülteni-29 | Earthquake                | 1 | 1 | 1 | 1: 533 | 1: 538  |
| Kahramanmaraş'ta<br>Meydana Gelen<br>Deprem Hk. Basın<br>Bülteni-29 | Earthquake                | 1 | 1 | 1 | 1: 533 | 1: 538  |
| Kahramanmaraş'ta<br>Meydana Gelen<br>Deprem Hk. Basın<br>Bülteni-29 | Kahramanmaraş             | 1 | 0 | 0 | 1: 596 | 1: 608  |
| Kahramanmaraş'ta<br>Meydana Gelen<br>Deprem Hk. Basın<br>Bülteni-29 | Pazarcık                  | 0 | 1 | 0 | 1: 596 | 1: 608  |
| Kahramanmaraş'ta<br>Meydana Gelen<br>Deprem Hk. Basın<br>Bülteni-29 | Disaster                  | 1 | 1 | 1 | 1: 773 | 1: 776  |
| Kahramanmaraş'ta<br>Meydana Gelen<br>Deprem Hk. Basın<br>Bülteni-29 | Disaster                  | 1 | 1 | 1 | 1: 773 | 1: 776  |
| Kahramanmaraş'ta<br>Meydana Gelen<br>Deprem Hk. Basın<br>Bülteni-29 | Shelter&meal\Evacuation   | 1 | 1 | 1 | 1: 805 | 1: 811  |
| Kahramanmaraş'ta<br>Meydana Gelen<br>Deprem Hk. Basın<br>Bülteni-29 | Shelter&meal\Evacuation   | 1 | 1 | 1 | 1: 805 | 1: 811  |
| Kahramanmaraş'ta<br>Meydana Gelen<br>Deprem Hk. Basın<br>Bülteni-29 | AFAD                      | 1 | 1 | 1 | 1: 834 | 1: 837  |
| Kahramanmaraş'ta<br>Meydana Gelen<br>Deprem Hk. Basın<br>Bülteni-29 | AFAD                      | 1 | 1 | 1 | 1: 834 | 1: 837  |
| Kahramanmaraş'ta<br>Meydana Gelen<br>Deprem Hk. Basın<br>Bülteni-29 | Response\Coast guard&Navy | 1 | 1 | 1 | 1: 863 | 1: 876  |
| Kahramanmaraş'ta<br>Meydana Gelen<br>Deprem Hk. Basın<br>Bülteni-29 | Response\Coast guard&Navy | 1 | 1 | 1 | 1: 863 | 1: 876  |
| Kahramanmaraş'ta<br>Meydana Gelen<br>Deprem Hk. Basın<br>Bülteni-29 | Response\Number of staff  | 1 | 0 | 0 | 1: 940 | 1: 962  |
| Kahramanmaraş'ta<br>Meydana Gelen<br>Deprem Hk. Basın<br>Bülteni-29 | Response\Search&Rescue    | 1 | 1 | 1 | 1: 940 | 1: 953  |
| Kahramanmaraş'ta<br>Meydana Gelen<br>Deprem Hk. Basın<br>Bülteni-29 | Response\Search&Rescue    | 1 | 1 | 1 | 1: 940 | 1: 953  |
| Kahramanmaraş'ta<br>Meydana Gelen<br>Deprem Hk. Basın<br>Bülteni-29 | Response\Number           | 0 | 1 | 0 | 1: 940 | 1: 962  |
| Kahramanmaraş'ta<br>Meydana Gelen<br>Deprem Hk. Basın<br>Bülteni-29 | Response\Number of staff  | 1 | 0 | 0 | 1: 991 | 1: 1013 |
| Kahramanmaraş'ta<br>Meydana Gelen<br>Deprem Hk. Basın<br>Bülteni-29 | Response\Search&Rescue    | 1 | 1 | 1 | 1: 991 | 1: 1004 |
| Kahramanmaraş'ta<br>Meydana Gelen<br>Deprem Hk. Basın<br>Bülteni-29 | Response\Search&Rescue    | 1 | 1 | 1 | 1: 991 | 1: 1004 |
| Kahramanmaraş'ta<br>Meydana Gelen<br>Deprem Hk. Basın<br>Bülteni-29 | Response\Number           | 0 | 1 | 0 | 1: 991 | 1: 1013 |

|                                                                     |                           |   |   |   |         |         |
|---------------------------------------------------------------------|---------------------------|---|---|---|---------|---------|
| Kahramanmaraş'ta<br>Meydana Gelen<br>Deprem Hk. Basın<br>Bülteni-29 | Response\Number of staff  | 1 | 0 | 0 | 1: 1114 | 1: 1136 |
| Kahramanmaraş'ta<br>Meydana Gelen<br>Deprem Hk. Basın<br>Bülteni-29 | Response\Search&Rescue    | 1 | 1 | 1 | 1: 1114 | 1: 1127 |
| Kahramanmaraş'ta<br>Meydana Gelen<br>Deprem Hk. Basın<br>Bülteni-29 | Response\Search&Rescue    | 1 | 1 | 1 | 1: 1114 | 1: 1127 |
| Kahramanmaraş'ta<br>Meydana Gelen<br>Deprem Hk. Basın<br>Bülteni-29 | Response\Number           | 0 | 1 | 0 | 1: 1114 | 1: 1136 |
| Kahramanmaraş'ta<br>Meydana Gelen<br>Deprem Hk. Basın<br>Bülteni-29 | AFAD                      | 1 | 1 | 1 | 1: 1165 | 1: 1168 |
| Kahramanmaraş'ta<br>Meydana Gelen<br>Deprem Hk. Basın<br>Bülteni-29 | AFAD                      | 1 | 1 | 1 | 1: 1165 | 1: 1168 |
| Kahramanmaraş'ta<br>Meydana Gelen<br>Deprem Hk. Basın<br>Bülteni-29 | Response\Military         | 1 | 1 | 1 | 1: 1180 | 1: 1187 |
| Kahramanmaraş'ta<br>Meydana Gelen<br>Deprem Hk. Basın<br>Bülteni-29 | Response\Military         | 1 | 1 | 1 | 1: 1180 | 1: 1187 |
| Kahramanmaraş'ta<br>Meydana Gelen<br>Deprem Hk. Basın<br>Bülteni-29 | Response\Number of staff  | 1 | 0 | 0 | 1: 1299 | 1: 1313 |
| Kahramanmaraş'ta<br>Meydana Gelen<br>Deprem Hk. Basın<br>Bülteni-29 | Response\Number           | 0 | 1 | 0 | 1: 1299 | 1: 1313 |
| Kahramanmaraş'ta<br>Meydana Gelen<br>Deprem Hk. Basın<br>Bülteni-29 | Response\Number of staff  | 1 | 0 | 0 | 1: 1355 | 1: 1369 |
| Kahramanmaraş'ta<br>Meydana Gelen<br>Deprem Hk. Basın<br>Bülteni-29 | Response\Number           | 0 | 1 | 0 | 1: 1355 | 1: 1369 |
| Kahramanmaraş'ta<br>Meydana Gelen<br>Deprem Hk. Basın<br>Bülteni-29 | Disaster                  | 1 | 1 | 1 | 1: 1385 | 1: 1388 |
| Kahramanmaraş'ta<br>Meydana Gelen<br>Deprem Hk. Basın<br>Bülteni-29 | Disaster                  | 1 | 1 | 1 | 1: 1385 | 1: 1388 |
| Kahramanmaraş'ta<br>Meydana Gelen<br>Deprem Hk. Basın<br>Bülteni-29 | Disaster                  | 1 | 1 | 1 | 1: 1550 | 1: 1553 |
| Kahramanmaraş'ta<br>Meydana Gelen<br>Deprem Hk. Basın<br>Bülteni-29 | Disaster                  | 1 | 1 | 1 | 1: 1550 | 1: 1553 |
| Kahramanmaraş'ta<br>Meydana Gelen<br>Deprem Hk. Basın<br>Bülteni-29 | AFAD                      | 1 | 1 | 1 | 1: 1615 | 1: 1618 |
| Kahramanmaraş'ta<br>Meydana Gelen<br>Deprem Hk. Basın<br>Bülteni-29 | AFAD                      | 1 | 1 | 1 | 1: 1615 | 1: 1618 |
| Kahramanmaraş'ta<br>Meydana Gelen<br>Deprem Hk. Basın<br>Bülteni-29 | Coordination\Coordination | 1 | 1 | 1 | 1: 1707 | 1: 1718 |
| Kahramanmaraş'ta<br>Meydana Gelen<br>Deprem Hk. Basın<br>Bülteni-29 | Coordination\Coordination | 1 | 1 | 1 | 1: 1707 | 1: 1718 |

|                                                                     |                           |   |   |   |         |         |
|---------------------------------------------------------------------|---------------------------|---|---|---|---------|---------|
| Kahramanmaraş'ta<br>Meydana Gelen<br>Deprem Hk. Basın<br>Bülteni-29 | Response\Coast guard&Navy | 1 | 1 | 1 | 1: 1911 | 1: 1926 |
| Kahramanmaraş'ta<br>Meydana Gelen<br>Deprem Hk. Basın<br>Bülteni-29 | Response\Coast guard&Navy | 1 | 1 | 1 | 1: 1911 | 1: 1926 |
| Kahramanmaraş'ta<br>Meydana Gelen<br>Deprem Hk. Basın<br>Bülteni-29 | Response\Coast guard&Navy | 1 | 1 | 1 | 1: 1929 | 1: 1942 |
| Kahramanmaraş'ta<br>Meydana Gelen<br>Deprem Hk. Basın<br>Bülteni-29 | Response\Coast guard&Navy | 1 | 1 | 1 | 1: 1929 | 1: 1942 |
| Kahramanmaraş'ta<br>Meydana Gelen<br>Deprem Hk. Basın<br>Bülteni-29 | Response\Military         | 1 | 1 | 1 | 1: 1958 | 1: 1965 |
| Kahramanmaraş'ta<br>Meydana Gelen<br>Deprem Hk. Basın<br>Bülteni-29 | Response\Military         | 1 | 1 | 1 | 1: 1958 | 1: 1965 |
| Kahramanmaraş'ta<br>Meydana Gelen<br>Deprem Hk. Basın<br>Bülteni-29 | Shelter&meal\Evacuation   | 1 | 1 | 1 | 1: 2171 | 1: 2177 |
| Kahramanmaraş'ta<br>Meydana Gelen<br>Deprem Hk. Basın<br>Bülteni-29 | Shelter&meal\Evacuation   | 1 | 1 | 1 | 1: 2171 | 1: 2177 |
| Kahramanmaraş'ta<br>Meydana Gelen<br>Deprem Hk. Basın<br>Bülteni-29 | Response\Coast guard&Navy | 1 | 1 | 1 | 1: 2188 | 1: 2203 |
| Kahramanmaraş'ta<br>Meydana Gelen<br>Deprem Hk. Basın<br>Bülteni-29 | Response\Coast guard&Navy | 1 | 1 | 1 | 1: 2188 | 1: 2203 |
| Kahramanmaraş'ta<br>Meydana Gelen<br>Deprem Hk. Basın<br>Bülteni-29 | Response\Coast guard&Navy | 1 | 1 | 1 | 1: 2232 | 1: 2245 |
| Kahramanmaraş'ta<br>Meydana Gelen<br>Deprem Hk. Basın<br>Bülteni-29 | Response\Coast guard&Navy | 1 | 1 | 1 | 1: 2232 | 1: 2245 |
| Kahramanmaraş'ta<br>Meydana Gelen<br>Deprem Hk. Basın<br>Bülteni-29 | Disaster                  | 1 | 1 | 1 | 1: 2322 | 1: 2325 |
| Kahramanmaraş'ta<br>Meydana Gelen<br>Deprem Hk. Basın<br>Bülteni-29 | Disaster                  | 1 | 1 | 1 | 1: 2322 | 1: 2325 |
| Kahramanmaraş'ta<br>Meydana Gelen<br>Deprem Hk. Basın<br>Bülteni-29 | Shelter&meal\Sheltering   | 1 | 1 | 1 | 1: 2327 | 1: 2333 |
| Kahramanmaraş'ta<br>Meydana Gelen<br>Deprem Hk. Basın<br>Bülteni-29 | Shelter&meal\Sheltering   | 1 | 1 | 1 | 1: 2327 | 1: 2333 |
| Kahramanmaraş'ta<br>Meydana Gelen<br>Deprem Hk. Basın<br>Bülteni-29 | Earthquake                | 1 | 1 | 1 | 1: 2342 | 1: 2347 |
| Kahramanmaraş'ta<br>Meydana Gelen<br>Deprem Hk. Basın<br>Bülteni-29 | Earthquake                | 1 | 1 | 1 | 1: 2342 | 1: 2347 |
| Kahramanmaraş'ta<br>Meydana Gelen<br>Deprem Hk. Basın<br>Bülteni-29 | AFAD                      | 1 | 1 | 1 | 1: 2388 | 1: 2391 |
| Kahramanmaraş'ta<br>Meydana Gelen<br>Deprem Hk. Basın<br>Bülteni-29 | AFAD                      | 1 | 1 | 1 | 1: 2388 | 1: 2391 |

|                                                                     |                             |   |   |   |         |         |
|---------------------------------------------------------------------|-----------------------------|---|---|---|---------|---------|
| Kahramanmaraş'ta<br>Meydana Gelen<br>Deprem Hk. Basın<br>Bülteni-29 | Response\Welfare service    | 1 | 1 | 1 | 1: 2402 | 1: 2414 |
| Kahramanmaraş'ta<br>Meydana Gelen<br>Deprem Hk. Basın<br>Bülteni-29 | Response\Welfare service    | 1 | 1 | 1 | 1: 2402 | 1: 2414 |
| Kahramanmaraş'ta<br>Meydana Gelen<br>Deprem Hk. Basın<br>Bülteni-29 | Shelter&meal\Tent           | 1 | 1 | 1 | 1: 2545 | 1: 2549 |
| Kahramanmaraş'ta<br>Meydana Gelen<br>Deprem Hk. Basın<br>Bülteni-29 | Shelter&meal\Tent           | 1 | 1 | 1 | 1: 2545 | 1: 2549 |
| Kahramanmaraş'ta<br>Meydana Gelen<br>Deprem Hk. Basın<br>Bülteni-29 | Shelter&meal\Tent           | 1 | 1 | 1 | 1: 2610 | 1: 2614 |
| Kahramanmaraş'ta<br>Meydana Gelen<br>Deprem Hk. Basın<br>Bülteni-29 | Shelter&meal\Tent           | 1 | 1 | 1 | 1: 2610 | 1: 2614 |
| Kahramanmaraş'ta<br>Meydana Gelen<br>Deprem Hk. Basın<br>Bülteni-29 | Disaster                    | 1 | 1 | 1 | 1: 2647 | 1: 2650 |
| Kahramanmaraş'ta<br>Meydana Gelen<br>Deprem Hk. Basın<br>Bülteni-29 | Disaster                    | 1 | 1 | 1 | 1: 2647 | 1: 2650 |
| Kahramanmaraş'ta<br>Meydana Gelen<br>Deprem Hk. Basın<br>Bülteni-29 | AFAD                        | 1 | 1 | 1 | 1: 2677 | 1: 2680 |
| Kahramanmaraş'ta<br>Meydana Gelen<br>Deprem Hk. Basın<br>Bülteni-29 | AFAD                        | 1 | 1 | 1 | 1: 2677 | 1: 2680 |
| Kahramanmaraş'ta<br>Meydana Gelen<br>Deprem Hk. Basın<br>Bülteni-29 | Response\Military           | 1 | 1 | 1 | 1: 2688 | 1: 2695 |
| Kahramanmaraş'ta<br>Meydana Gelen<br>Deprem Hk. Basın<br>Bülteni-29 | Response\Military           | 1 | 1 | 1 | 1: 2688 | 1: 2695 |
| Kahramanmaraş'ta<br>Meydana Gelen<br>Deprem Hk. Basın<br>Bülteni-29 | Coordination\NGO            | 1 | 1 | 1 | 1: 2700 | 1: 2711 |
| Kahramanmaraş'ta<br>Meydana Gelen<br>Deprem Hk. Basın<br>Bülteni-29 | Coordination\NGO            | 1 | 1 | 1 | 1: 2700 | 1: 2711 |
| Kahramanmaraş'ta<br>Meydana Gelen<br>Deprem Hk. Basın<br>Bülteni-29 | Shelter&meal\Mobile kitchen | 1 | 1 | 1 | 1: 2792 | 1: 2803 |
| Kahramanmaraş'ta<br>Meydana Gelen<br>Deprem Hk. Basın<br>Bülteni-29 | Shelter&meal\Mobile kitchen | 1 | 1 | 1 | 1: 2792 | 1: 2803 |
| Kahramanmaraş'ta<br>Meydana Gelen<br>Deprem Hk. Basın<br>Bülteni-29 | Shelter&meal\Mobile bakery  | 1 | 1 | 1 | 1: 2826 | 1: 2836 |
| Kahramanmaraş'ta<br>Meydana Gelen<br>Deprem Hk. Basın<br>Bülteni-29 | Shelter&meal\Mobile bakery  | 1 | 1 | 1 | 1: 2826 | 1: 2836 |
| Kahramanmaraş'ta<br>Meydana Gelen<br>Deprem Hk. Basın<br>Bülteni-29 | Disaster                    | 1 | 1 | 1 | 1: 2884 | 1: 2887 |
| Kahramanmaraş'ta<br>Meydana Gelen<br>Deprem Hk. Basın<br>Bülteni-29 | Disaster                    | 1 | 1 | 1 | 1: 2884 | 1: 2887 |

|                                                                     |                               |   |   |   |         |         |
|---------------------------------------------------------------------|-------------------------------|---|---|---|---------|---------|
| Kahramanmaraş'ta<br>Meydana Gelen<br>Deprem Hk. Basın<br>Bülteni-29 | Shelter&meal\Hot meal         | 1 | 1 | 1 | 1: 2911 | 1: 2921 |
| Kahramanmaraş'ta<br>Meydana Gelen<br>Deprem Hk. Basın<br>Bülteni-29 | Shelter&meal\Hot meal         | 1 | 1 | 1 | 1: 2911 | 1: 2921 |
| Kahramanmaraş'ta<br>Meydana Gelen<br>Deprem Hk. Basın<br>Bülteni-29 | Disaster                      | 1 | 1 | 1 | 1: 3043 | 1: 3046 |
| Kahramanmaraş'ta<br>Meydana Gelen<br>Deprem Hk. Basın<br>Bülteni-29 | Disaster                      | 1 | 1 | 1 | 1: 3043 | 1: 3046 |
| Kahramanmaraş'ta<br>Meydana Gelen<br>Deprem Hk. Basın<br>Bülteni-29 | Response\Psychosocial support | 1 | 1 | 1 | 1: 3048 | 1: 3058 |
| Kahramanmaraş'ta<br>Meydana Gelen<br>Deprem Hk. Basın<br>Bülteni-29 | Response\Psychosocial support | 1 | 1 | 1 | 1: 3048 | 1: 3058 |
| Kahramanmaraş'ta<br>Meydana Gelen<br>Deprem Hk. Basın<br>Bülteni-29 | Response\Welfare service      | 1 | 1 | 1 | 1: 3082 | 1: 3094 |
| Kahramanmaraş'ta<br>Meydana Gelen<br>Deprem Hk. Basın<br>Bülteni-29 | Response\Welfare service      | 1 | 1 | 1 | 1: 3082 | 1: 3094 |
| Kahramanmaraş'ta<br>Meydana Gelen<br>Deprem Hk. Basın<br>Bülteni-29 | Kahramanmaraş                 | 1 | 0 | 0 | 1: 3105 | 1: 3117 |
| Kahramanmaraş'ta<br>Meydana Gelen<br>Deprem Hk. Basın<br>Bülteni-29 | Pazarcık                      | 0 | 1 | 0 | 1: 3105 | 1: 3117 |
| Kahramanmaraş'ta<br>Meydana Gelen<br>Deprem Hk. Basın<br>Bülteni-29 | Earthquake                    | 1 | 1 | 1 | 1: 3230 | 1: 3235 |
| Kahramanmaraş'ta<br>Meydana Gelen<br>Deprem Hk. Basın<br>Bülteni-29 | Earthquake                    | 1 | 1 | 1 | 1: 3230 | 1: 3235 |
| Kahramanmaraş'ta<br>Meydana Gelen<br>Deprem Hk. Basın<br>Bülteni-29 | Earthquake                    | 1 | 1 | 1 | 1: 3257 | 1: 3262 |
| Kahramanmaraş'ta<br>Meydana Gelen<br>Deprem Hk. Basın<br>Bülteni-29 | Earthquake                    | 1 | 1 | 1 | 1: 3257 | 1: 3262 |
| Kahramanmaraş'ta<br>Meydana Gelen<br>Deprem Hk. Basın<br>Bülteni-29 | Response\Psychosocial support | 1 | 1 | 1 | 1: 3321 | 1: 3331 |
| Kahramanmaraş'ta<br>Meydana Gelen<br>Deprem Hk. Basın<br>Bülteni-29 | Response\Psychosocial support | 1 | 1 | 1 | 1: 3321 | 1: 3331 |
| Kahramanmaraş'ta<br>Meydana Gelen<br>Deprem Hk. Basın<br>Bülteni-29 | Kahramanmaraş                 | 1 | 0 | 0 | 2: 17   | 2: 29   |
| Kahramanmaraş'ta<br>Meydana Gelen<br>Deprem Hk. Basın<br>Bülteni-29 | Pazarcık                      | 0 | 1 | 0 | 2: 17   | 2: 29   |
| Kahramanmaraş'ta<br>Meydana Gelen<br>Deprem Hk. Basın<br>Bülteni-29 | Earthquake                    | 1 | 1 | 1 | 2: 48   | 2: 53   |
| Kahramanmaraş'ta<br>Meydana Gelen<br>Deprem Hk. Basın<br>Bülteni-29 | Earthquake                    | 1 | 1 | 1 | 2: 48   | 2: 53   |

|                                                                     |                               |   |   |   |        |        |
|---------------------------------------------------------------------|-------------------------------|---|---|---|--------|--------|
| Kahramanmaraş'ta<br>Meydana Gelen<br>Deprem Hk. Basın<br>Bülteni-29 | AFAD                          | 1 | 1 | 1 | 2: 92  | 2: 95  |
| Kahramanmaraş'ta<br>Meydana Gelen<br>Deprem Hk. Basın<br>Bülteni-29 | AFAD                          | 1 | 1 | 1 | 2: 92  | 2: 95  |
| Kahramanmaraş'ta<br>Meydana Gelen<br>Deprem Hk. Basın<br>Bülteni-29 | Earthquake                    | 1 | 1 | 1 | 2: 134 | 2: 139 |
| Kahramanmaraş'ta<br>Meydana Gelen<br>Deprem Hk. Basın<br>Bülteni-29 | Earthquake                    | 1 | 1 | 1 | 2: 134 | 2: 139 |
| Kahramanmaraş'ta<br>Meydana Gelen<br>Deprem Hk. Basın<br>Bülteni-29 | Disaster                      | 1 | 1 | 1 | 2: 323 | 2: 326 |
| Kahramanmaraş'ta<br>Meydana Gelen<br>Deprem Hk. Basın<br>Bülteni-29 | Disaster                      | 1 | 1 | 1 | 2: 323 | 2: 326 |
| Kahramanmaraş'ta<br>Meydana Gelen<br>Deprem Hk. Basın<br>Bülteni-29 | Coordination\Public relations | 1 | 1 | 1 | 2: 482 | 2: 487 |
| Kahramanmaraş'ta<br>Meydana Gelen<br>Deprem Hk. Basın<br>Bülteni-29 | Coordination\Public relations | 1 | 1 | 1 | 2: 482 | 2: 487 |
| Kahramanmaraş'ta<br>Meydana Gelen<br>Deprem Hk. Basın<br>Bülteni-29 | AFAD                          | 1 | 1 | 1 | 2: 522 | 2: 525 |
| Kahramanmaraş'ta<br>Meydana Gelen<br>Deprem Hk. Basın<br>Bülteni-29 | AFAD                          | 1 | 1 | 1 | 2: 522 | 2: 525 |
| Kahramanmaraş'ta<br>Meydana Gelen<br>Deprem Hk. Basın<br>Bülteni-29 | AFAD                          | 1 | 1 | 1 | 2: 580 | 2: 583 |
| Kahramanmaraş'ta<br>Meydana Gelen<br>Deprem Hk. Basın<br>Bülteni-29 | AFAD                          | 1 | 1 | 1 | 2: 580 | 2: 583 |
| Kahramanmaraş'ta<br>Meydana Gelen<br>Deprem Hk. Basın<br>Bülteni-29 | AFAD                          | 1 | 1 | 1 | 2: 697 | 2: 700 |
| Kahramanmaraş'ta<br>Meydana Gelen<br>Deprem Hk. Basın<br>Bülteni-29 | AFAD                          | 1 | 1 | 1 | 2: 697 | 2: 700 |
| Kahramanmaraş'ta<br>Meydana Gelen<br>Deprem Hk. Basın<br>Bülteni-29 | Response\Search&Rescue        | 1 | 1 | 1 | 2: 791 | 2: 804 |
| Kahramanmaraş'ta<br>Meydana Gelen<br>Deprem Hk. Basın<br>Bülteni-29 | Response\Search&Rescue        | 1 | 1 | 1 | 2: 791 | 2: 804 |
| Kahramanmaraş'ta<br>Meydana Gelen<br>Deprem Hk. Basın<br>Bülteni-29 | Disaster                      | 1 | 1 | 1 | 2: 855 | 2: 858 |
| Kahramanmaraş'ta<br>Meydana Gelen<br>Deprem Hk. Basın<br>Bülteni-29 | Disaster                      | 1 | 1 | 1 | 2: 855 | 2: 858 |
| Kahramanmaraş'ta<br>Meydana Gelen<br>Deprem Hk. Basın<br>Bülteni-29 | AFAD                          | 1 | 1 | 1 | 2: 873 | 2: 876 |
| Kahramanmaraş'ta<br>Meydana Gelen<br>Deprem Hk. Basın<br>Bülteni-29 | AFAD                          | 1 | 1 | 1 | 2: 873 | 2: 876 |

|                                                                     |                                 |   |   |   |         |         |
|---------------------------------------------------------------------|---------------------------------|---|---|---|---------|---------|
| Kahramanmaraş'ta<br>Meydana Gelen<br>Deprem Hk. Basın<br>Bülteni-29 | Preparedness\Preparedness       | 1 | 1 | 1 | 2: 937  | 2: 947  |
| Kahramanmaraş'ta<br>Meydana Gelen<br>Deprem Hk. Basın<br>Bülteni-29 | Preparedness\Preparedness       | 1 | 1 | 1 | 2: 937  | 2: 947  |
| Kahramanmaraş'ta<br>Meydana Gelen<br>Deprem Hk. Basın<br>Bülteni-29 | Disaster                        | 1 | 1 | 1 | 2: 937  | 2: 940  |
| Kahramanmaraş'ta<br>Meydana Gelen<br>Deprem Hk. Basın<br>Bülteni-29 | Disaster                        | 1 | 1 | 1 | 2: 937  | 2: 940  |
| Kahramanmaraş'ta<br>Meydana Gelen<br>Deprem Hk. Basın<br>Bülteni-29 | Disaster                        | 1 | 1 | 1 | 2: 985  | 2: 988  |
| Kahramanmaraş'ta<br>Meydana Gelen<br>Deprem Hk. Basın<br>Bülteni-29 | Disaster                        | 1 | 1 | 1 | 2: 985  | 2: 988  |
| Kahramanmaraş'ta<br>Meydana Gelen<br>Deprem Hk. Basın<br>Bülteni-29 | Recovery\Fund drive             | 1 | 1 | 1 | 2: 1046 | 2: 1064 |
| Kahramanmaraş'ta<br>Meydana Gelen<br>Deprem Hk. Basın<br>Bülteni-29 | Recovery\Fund drive             | 1 | 1 | 1 | 2: 1046 | 2: 1064 |
| Kahramanmaraş'ta<br>Meydana Gelen<br>Deprem Hk. Basın<br>Bülteni-29 | Coordination\Social media       | 1 | 0 | 0 | 2: 1162 | 2: 1173 |
| Kahramanmaraş'ta<br>Meydana Gelen<br>Deprem Hk. Basın<br>Bülteni-29 | Coordination\Social media usage | 0 | 1 | 0 | 2: 1162 | 2: 1173 |
| Kahramanmaraş'ta<br>Meydana Gelen<br>Deprem Hk. Basın<br>Bülteni-29 | AFAD                            | 1 | 1 | 1 | 2: 1218 | 2: 1221 |
| Kahramanmaraş'ta<br>Meydana Gelen<br>Deprem Hk. Basın<br>Bülteni-29 | AFAD                            | 1 | 1 | 1 | 2: 1218 | 2: 1221 |
| Kahramanmaraş'ta<br>Meydana Gelen<br>Deprem Hk. Basın<br>Bülteni-29 | AFAD                            | 1 | 1 | 1 | 2: 1240 | 2: 1243 |
| Kahramanmaraş'ta<br>Meydana Gelen<br>Deprem Hk. Basın<br>Bülteni-29 | AFAD                            | 1 | 1 | 1 | 2: 1240 | 2: 1243 |
| Kahramanmaraş'ta<br>Meydana Gelen<br>Deprem Hk. Basın<br>Bülteni-29 | Coordination\Information        | 1 | 1 | 1 | 2: 1285 | 2: 1296 |
| Kahramanmaraş'ta<br>Meydana Gelen<br>Deprem Hk. Basın<br>Bülteni-29 | Coordination\Information        | 1 | 1 | 1 | 2: 1285 | 2: 1296 |
| Kahramanmaraş'ta<br>Meydana Gelen<br>Deprem Hk. Basın<br>Bülteni-29 | Recovery\Peacemaking            | 1 | 1 | 1 | 2: 1301 | 2: 1310 |
| Kahramanmaraş'ta<br>Meydana Gelen<br>Deprem Hk. Basın<br>Bülteni-29 | Recovery\Peacemaking            | 1 | 1 | 1 | 2: 1301 | 2: 1310 |
| Kahramanmaraş'ta<br>Meydana Gelen<br>Deprem Hk. Basın<br>Bülteni-29 | Coordination\Social media       | 1 | 0 | 0 | 2: 1357 | 2: 1368 |
| Kahramanmaraş'ta<br>Meydana Gelen<br>Deprem Hk. Basın<br>Bülteni-29 | Coordination\Social media usage | 0 | 1 | 0 | 2: 1357 | 2: 1368 |



|                                                                     |               |   |   |   |        |        |
|---------------------------------------------------------------------|---------------|---|---|---|--------|--------|
| Kahramanmaraş'ta<br>Meydana Gelen<br>Deprem Hk. Basın<br>Bülteni-29 | Kahramanmaraş | 1 | 0 | 0 | 3: 17  | 3: 29  |
| Kahramanmaraş'ta<br>Meydana Gelen<br>Deprem Hk. Basın<br>Bülteni-29 | Pazarcık      | 0 | 1 | 0 | 3: 17  | 3: 29  |
| Kahramanmaraş'ta<br>Meydana Gelen<br>Deprem Hk. Basın<br>Bülteni-29 | Earthquake    | 1 | 1 | 1 | 3: 48  | 3: 53  |
| Kahramanmaraş'ta<br>Meydana Gelen<br>Deprem Hk. Basın<br>Bülteni-29 | Earthquake    | 1 | 1 | 1 | 3: 48  | 3: 53  |
| Kahramanmaraş'ta<br>Meydana Gelen<br>Deprem Hk. Basın<br>Bülteni-29 | AFAD          | 1 | 1 | 1 | 3: 92  | 3: 95  |
| Kahramanmaraş'ta<br>Meydana Gelen<br>Deprem Hk. Basın<br>Bülteni-29 | AFAD          | 1 | 1 | 1 | 3: 92  | 3: 95  |
| Kahramanmaraş'ta<br>Meydana Gelen<br>Deprem Hk. Basın<br>Bülteni-29 | Earthquake    | 1 | 1 | 1 | 3: 134 | 3: 139 |
| Kahramanmaraş'ta<br>Meydana Gelen<br>Deprem Hk. Basın<br>Bülteni-29 | Earthquake    | 1 | 1 | 1 | 3: 134 | 3: 139 |
| Kahramanmaraş'ta<br>Meydana Gelen<br>Deprem Hk. Basın<br>Bülteni-29 | Disaster      | 1 | 1 | 1 | 3: 199 | 3: 202 |
| Kahramanmaraş'ta<br>Meydana Gelen<br>Deprem Hk. Basın<br>Bülteni-29 | Disaster      | 1 | 1 | 1 | 3: 199 | 3: 202 |
| Kahramanmaraş'ta<br>Meydana Gelen<br>Deprem Hk. Basın<br>Bülteni-29 | Emergency     | 1 | 1 | 1 | 3: 207 | 3: 216 |
| Kahramanmaraş'ta<br>Meydana Gelen<br>Deprem Hk. Basın<br>Bülteni-29 | Emergency     | 1 | 1 | 1 | 3: 207 | 3: 216 |
| Kahramanmaraş'ta<br>Meydana Gelen<br>Deprem Hk. Basın<br>Bülteni-33 | Kahramanmaraş | 1 | 0 | 0 | 1: 17  | 1: 29  |
| Kahramanmaraş'ta<br>Meydana Gelen<br>Deprem Hk. Basın<br>Bülteni-33 | Pazarcık      | 0 | 1 | 0 | 1: 17  | 1: 29  |
| Kahramanmaraş'ta<br>Meydana Gelen<br>Deprem Hk. Basın<br>Bülteni-33 | Earthquake    | 1 | 1 | 1 | 1: 48  | 1: 53  |
| Kahramanmaraş'ta<br>Meydana Gelen<br>Deprem Hk. Basın<br>Bülteni-33 | Earthquake    | 1 | 1 | 1 | 1: 48  | 1: 53  |
| Kahramanmaraş'ta<br>Meydana Gelen<br>Deprem Hk. Basın<br>Bülteni-33 | AFAD          | 1 | 1 | 1 | 1: 92  | 1: 95  |
| Kahramanmaraş'ta<br>Meydana Gelen<br>Deprem Hk. Basın<br>Bülteni-33 | AFAD          | 1 | 1 | 1 | 1: 92  | 1: 95  |
| Kahramanmaraş'ta<br>Meydana Gelen<br>Deprem Hk. Basın<br>Bülteni-33 | Earthquake    | 1 | 1 | 1 | 1: 134 | 1: 139 |
| Kahramanmaraş'ta<br>Meydana Gelen<br>Deprem Hk. Basın<br>Bülteni-33 | Earthquake    | 1 | 1 | 1 | 1: 134 | 1: 139 |

|                                                                     |               |   |   |   |        |        |
|---------------------------------------------------------------------|---------------|---|---|---|--------|--------|
| Kahramanmaraş'ta<br>Meydana Gelen<br>Deprem Hk. Basın<br>Bülteni-33 | Kahramanmaraş | 1 | 0 | 0 | 1: 169 | 1: 181 |
| Kahramanmaraş'ta<br>Meydana Gelen<br>Deprem Hk. Basın<br>Bülteni-33 | Pazarcık      | 0 | 1 | 0 | 1: 169 | 1: 181 |
| Kahramanmaraş'ta<br>Meydana Gelen<br>Deprem Hk. Basın<br>Bülteni-33 | Earthquake    | 1 | 1 | 1 | 1: 200 | 1: 205 |
| Kahramanmaraş'ta<br>Meydana Gelen<br>Deprem Hk. Basın<br>Bülteni-33 | Earthquake    | 1 | 1 | 1 | 1: 200 | 1: 205 |
| Kahramanmaraş'ta<br>Meydana Gelen<br>Deprem Hk. Basın<br>Bülteni-33 | Kahramanmaraş | 1 | 0 | 0 | 1: 282 | 1: 294 |
| Kahramanmaraş'ta<br>Meydana Gelen<br>Deprem Hk. Basın<br>Bülteni-33 | Pazarcık      | 0 | 1 | 0 | 1: 282 | 1: 294 |
| Kahramanmaraş'ta<br>Meydana Gelen<br>Deprem Hk. Basın<br>Bülteni-33 | Earthquake    | 1 | 1 | 1 | 1: 313 | 1: 318 |
| Kahramanmaraş'ta<br>Meydana Gelen<br>Deprem Hk. Basın<br>Bülteni-33 | Earthquake    | 1 | 1 | 1 | 1: 313 | 1: 318 |
| Kahramanmaraş'ta<br>Meydana Gelen<br>Deprem Hk. Basın<br>Bülteni-33 | Kahramanmaraş | 1 | 0 | 0 | 1: 354 | 1: 366 |
| Kahramanmaraş'ta<br>Meydana Gelen<br>Deprem Hk. Basın<br>Bülteni-33 | Pazarcık      | 0 | 1 | 0 | 1: 354 | 1: 366 |
| Kahramanmaraş'ta<br>Meydana Gelen<br>Deprem Hk. Basın<br>Bülteni-33 | Earthquake    | 1 | 1 | 1 | 1: 448 | 1: 453 |
| Kahramanmaraş'ta<br>Meydana Gelen<br>Deprem Hk. Basın<br>Bülteni-33 | Earthquake    | 1 | 1 | 1 | 1: 448 | 1: 453 |
| Kahramanmaraş'ta<br>Meydana Gelen<br>Deprem Hk. Basın<br>Bülteni-33 | Earthquake    | 1 | 1 | 1 | 1: 475 | 1: 480 |
| Kahramanmaraş'ta<br>Meydana Gelen<br>Deprem Hk. Basın<br>Bülteni-33 | Earthquake    | 1 | 1 | 1 | 1: 475 | 1: 480 |
| Kahramanmaraş'ta<br>Meydana Gelen<br>Deprem Hk. Basın<br>Bülteni-33 | Earthquake    | 1 | 1 | 1 | 1: 508 | 1: 513 |
| Kahramanmaraş'ta<br>Meydana Gelen<br>Deprem Hk. Basın<br>Bülteni-33 | Earthquake    | 1 | 1 | 1 | 1: 508 | 1: 513 |
| Kahramanmaraş'ta<br>Meydana Gelen<br>Deprem Hk. Basın<br>Bülteni-33 | Kahramanmaraş | 1 | 0 | 0 | 1: 561 | 1: 573 |
| Kahramanmaraş'ta<br>Meydana Gelen<br>Deprem Hk. Basın<br>Bülteni-33 | Pazarcık      | 0 | 1 | 0 | 1: 561 | 1: 573 |
| Kahramanmaraş'ta<br>Meydana Gelen<br>Deprem Hk. Basın<br>Bülteni-33 | AFAD          | 1 | 1 | 1 | 1: 739 | 1: 742 |
| Kahramanmaraş'ta<br>Meydana Gelen<br>Deprem Hk. Basın<br>Bülteni-33 | AFAD          | 1 | 1 | 1 | 1: 739 | 1: 742 |

|                                                                     |                           |   |   |   |         |         |
|---------------------------------------------------------------------|---------------------------|---|---|---|---------|---------|
| Kahramanmaraş'ta<br>Meydana Gelen<br>Deprem Hk. Basın<br>Bülteni-33 | Response\Coast guard&Navy | 1 | 1 | 1 | 1: 768  | 1: 781  |
| Kahramanmaraş'ta<br>Meydana Gelen<br>Deprem Hk. Basın<br>Bülteni-33 | Response\Coast guard&Navy | 1 | 1 | 1 | 1: 768  | 1: 781  |
| Kahramanmaraş'ta<br>Meydana Gelen<br>Deprem Hk. Basın<br>Bülteni-33 | Response\Number of staff  | 1 | 0 | 0 | 1: 845  | 1: 867  |
| Kahramanmaraş'ta<br>Meydana Gelen<br>Deprem Hk. Basın<br>Bülteni-33 | Response\Search&Rescue    | 1 | 1 | 1 | 1: 845  | 1: 858  |
| Kahramanmaraş'ta<br>Meydana Gelen<br>Deprem Hk. Basın<br>Bülteni-33 | Response\Search&Rescue    | 1 | 1 | 1 | 1: 845  | 1: 858  |
| Kahramanmaraş'ta<br>Meydana Gelen<br>Deprem Hk. Basın<br>Bülteni-33 | Response\Number           | 0 | 1 | 0 | 1: 845  | 1: 867  |
| Kahramanmaraş'ta<br>Meydana Gelen<br>Deprem Hk. Basın<br>Bülteni-33 | Response\Number of staff  | 1 | 0 | 0 | 1: 896  | 1: 918  |
| Kahramanmaraş'ta<br>Meydana Gelen<br>Deprem Hk. Basın<br>Bülteni-33 | Response\Search&Rescue    | 1 | 1 | 1 | 1: 896  | 1: 909  |
| Kahramanmaraş'ta<br>Meydana Gelen<br>Deprem Hk. Basın<br>Bülteni-33 | Response\Search&Rescue    | 1 | 1 | 1 | 1: 896  | 1: 909  |
| Kahramanmaraş'ta<br>Meydana Gelen<br>Deprem Hk. Basın<br>Bülteni-33 | Response\Number           | 0 | 1 | 0 | 1: 896  | 1: 918  |
| Kahramanmaraş'ta<br>Meydana Gelen<br>Deprem Hk. Basın<br>Bülteni-33 | AFAD                      | 1 | 1 | 1 | 1: 948  | 1: 951  |
| Kahramanmaraş'ta<br>Meydana Gelen<br>Deprem Hk. Basın<br>Bülteni-33 | AFAD                      | 1 | 1 | 1 | 1: 948  | 1: 951  |
| Kahramanmaraş'ta<br>Meydana Gelen<br>Deprem Hk. Basın<br>Bülteni-33 | Response\Military         | 1 | 1 | 1 | 1: 963  | 1: 970  |
| Kahramanmaraş'ta<br>Meydana Gelen<br>Deprem Hk. Basın<br>Bülteni-33 | Response\Military         | 1 | 1 | 1 | 1: 963  | 1: 970  |
| Kahramanmaraş'ta<br>Meydana Gelen<br>Deprem Hk. Basın<br>Bülteni-33 | Response\Number of staff  | 1 | 0 | 0 | 1: 1104 | 1: 1118 |
| Kahramanmaraş'ta<br>Meydana Gelen<br>Deprem Hk. Basın<br>Bülteni-33 | Response\Number           | 0 | 1 | 0 | 1: 1104 | 1: 1118 |
| Kahramanmaraş'ta<br>Meydana Gelen<br>Deprem Hk. Basın<br>Bülteni-33 | Disaster                  | 1 | 1 | 1 | 1: 1190 | 1: 1193 |
| Kahramanmaraş'ta<br>Meydana Gelen<br>Deprem Hk. Basın<br>Bülteni-33 | Disaster                  | 1 | 1 | 1 | 1: 1190 | 1: 1193 |
| Kahramanmaraş'ta<br>Meydana Gelen<br>Deprem Hk. Basın<br>Bülteni-33 | Disaster                  | 1 | 1 | 1 | 1: 1355 | 1: 1358 |
| Kahramanmaraş'ta<br>Meydana Gelen<br>Deprem Hk. Basın<br>Bülteni-33 | Disaster                  | 1 | 1 | 1 | 1: 1355 | 1: 1358 |

|                                                                     |                           |   |   |   |         |         |
|---------------------------------------------------------------------|---------------------------|---|---|---|---------|---------|
| Kahramanmaraş'ta<br>Meydana Gelen<br>Deprem Hk. Basın<br>Bülteni-33 | AFAD                      | 1 | 1 | 1 | 1: 1407 | 1: 1410 |
| Kahramanmaraş'ta<br>Meydana Gelen<br>Deprem Hk. Basın<br>Bülteni-33 | AFAD                      | 1 | 1 | 1 | 1: 1407 | 1: 1410 |
| Kahramanmaraş'ta<br>Meydana Gelen<br>Deprem Hk. Basın<br>Bülteni-33 | Coordination\Coordination | 1 | 1 | 1 | 1: 1499 | 1: 1510 |
| Kahramanmaraş'ta<br>Meydana Gelen<br>Deprem Hk. Basın<br>Bülteni-33 | Coordination\Coordination | 1 | 1 | 1 | 1: 1499 | 1: 1510 |
| Kahramanmaraş'ta<br>Meydana Gelen<br>Deprem Hk. Basın<br>Bülteni-33 | Response\Coast guard&Navy | 1 | 1 | 1 | 1: 1701 | 1: 1716 |
| Kahramanmaraş'ta<br>Meydana Gelen<br>Deprem Hk. Basın<br>Bülteni-33 | Response\Coast guard&Navy | 1 | 1 | 1 | 1: 1701 | 1: 1716 |
| Kahramanmaraş'ta<br>Meydana Gelen<br>Deprem Hk. Basın<br>Bülteni-33 | Response\Military         | 1 | 1 | 1 | 1: 1748 | 1: 1755 |
| Kahramanmaraş'ta<br>Meydana Gelen<br>Deprem Hk. Basın<br>Bülteni-33 | Response\Military         | 1 | 1 | 1 | 1: 1748 | 1: 1755 |
| Kahramanmaraş'ta<br>Meydana Gelen<br>Deprem Hk. Basın<br>Bülteni-33 | Shelter&meal\Evacuation   | 1 | 1 | 1 | 1: 1977 | 1: 1983 |
| Kahramanmaraş'ta<br>Meydana Gelen<br>Deprem Hk. Basın<br>Bülteni-33 | Shelter&meal\Evacuation   | 1 | 1 | 1 | 1: 1977 | 1: 1983 |
| Kahramanmaraş'ta<br>Meydana Gelen<br>Deprem Hk. Basın<br>Bülteni-33 | Response\Coast guard&Navy | 1 | 1 | 1 | 1: 2021 | 1: 2034 |
| Kahramanmaraş'ta<br>Meydana Gelen<br>Deprem Hk. Basın<br>Bülteni-33 | Response\Coast guard&Navy | 1 | 1 | 1 | 1: 2021 | 1: 2034 |
| Kahramanmaraş'ta<br>Meydana Gelen<br>Deprem Hk. Basın<br>Bülteni-33 | Disaster                  | 1 | 1 | 1 | 1: 2096 | 1: 2099 |
| Kahramanmaraş'ta<br>Meydana Gelen<br>Deprem Hk. Basın<br>Bülteni-33 | Disaster                  | 1 | 1 | 1 | 1: 2096 | 1: 2099 |
| Kahramanmaraş'ta<br>Meydana Gelen<br>Deprem Hk. Basın<br>Bülteni-33 | Shelter&meal\Sheltering   | 1 | 1 | 1 | 1: 2101 | 1: 2107 |
| Kahramanmaraş'ta<br>Meydana Gelen<br>Deprem Hk. Basın<br>Bülteni-33 | Shelter&meal\Sheltering   | 1 | 1 | 1 | 1: 2101 | 1: 2107 |
| Kahramanmaraş'ta<br>Meydana Gelen<br>Deprem Hk. Basın<br>Bülteni-33 | Shelter&meal\Tent         | 1 | 1 | 1 | 1: 2222 | 1: 2226 |
| Kahramanmaraş'ta<br>Meydana Gelen<br>Deprem Hk. Basın<br>Bülteni-33 | Shelter&meal\Tent         | 1 | 1 | 1 | 1: 2222 | 1: 2226 |
| Kahramanmaraş'ta<br>Meydana Gelen<br>Deprem Hk. Basın<br>Bülteni-33 | Shelter&meal\Sheltering   | 1 | 1 | 1 | 1: 2373 | 1: 2379 |
| Kahramanmaraş'ta<br>Meydana Gelen<br>Deprem Hk. Basın<br>Bülteni-33 | Shelter&meal\Sheltering   | 1 | 1 | 1 | 1: 2373 | 1: 2379 |

|                                                                     |                               |   |   |   |         |         |
|---------------------------------------------------------------------|-------------------------------|---|---|---|---------|---------|
| Kahramanmaraş'ta<br>Meydana Gelen<br>Deprem Hk. Basın<br>Bülteni-33 | Shelter&meal\Sheltering       | 1 | 1 | 1 | 1: 2398 | 1: 2404 |
| Kahramanmaraş'ta<br>Meydana Gelen<br>Deprem Hk. Basın<br>Bülteni-33 | Shelter&meal\Sheltering       | 1 | 1 | 1 | 1: 2398 | 1: 2404 |
| Kahramanmaraş'ta<br>Meydana Gelen<br>Deprem Hk. Basın<br>Bülteni-33 | Disaster                      | 1 | 1 | 1 | 1: 2431 | 1: 2434 |
| Kahramanmaraş'ta<br>Meydana Gelen<br>Deprem Hk. Basın<br>Bülteni-33 | Disaster                      | 1 | 1 | 1 | 1: 2431 | 1: 2434 |
| Kahramanmaraş'ta<br>Meydana Gelen<br>Deprem Hk. Basın<br>Bülteni-33 | AFAD                          | 1 | 1 | 1 | 1: 2461 | 1: 2464 |
| Kahramanmaraş'ta<br>Meydana Gelen<br>Deprem Hk. Basın<br>Bülteni-33 | AFAD                          | 1 | 1 | 1 | 1: 2461 | 1: 2464 |
| Kahramanmaraş'ta<br>Meydana Gelen<br>Deprem Hk. Basın<br>Bülteni-33 | Response\Military             | 1 | 1 | 1 | 1: 2472 | 1: 2479 |
| Kahramanmaraş'ta<br>Meydana Gelen<br>Deprem Hk. Basın<br>Bülteni-33 | Response\Military             | 1 | 1 | 1 | 1: 2472 | 1: 2479 |
| Kahramanmaraş'ta<br>Meydana Gelen<br>Deprem Hk. Basın<br>Bülteni-33 | Coordination\NGO              | 1 | 1 | 1 | 1: 2484 | 1: 2495 |
| Kahramanmaraş'ta<br>Meydana Gelen<br>Deprem Hk. Basın<br>Bülteni-33 | Coordination\NGO              | 1 | 1 | 1 | 1: 2484 | 1: 2495 |
| Kahramanmaraş'ta<br>Meydana Gelen<br>Deprem Hk. Basın<br>Bülteni-33 | Disaster                      | 1 | 1 | 1 | 1: 2751 | 1: 2754 |
| Kahramanmaraş'ta<br>Meydana Gelen<br>Deprem Hk. Basın<br>Bülteni-33 | Disaster                      | 1 | 1 | 1 | 1: 2751 | 1: 2754 |
| Kahramanmaraş'ta<br>Meydana Gelen<br>Deprem Hk. Basın<br>Bülteni-33 | Shelter&meal\Hot meal         | 1 | 1 | 1 | 1: 2778 | 1: 2788 |
| Kahramanmaraş'ta<br>Meydana Gelen<br>Deprem Hk. Basın<br>Bülteni-33 | Shelter&meal\Hot meal         | 1 | 1 | 1 | 1: 2778 | 1: 2788 |
| Kahramanmaraş'ta<br>Meydana Gelen<br>Deprem Hk. Basın<br>Bülteni-33 | Disaster                      | 1 | 1 | 1 | 1: 2883 | 1: 2886 |
| Kahramanmaraş'ta<br>Meydana Gelen<br>Deprem Hk. Basın<br>Bülteni-33 | Disaster                      | 1 | 1 | 1 | 1: 2883 | 1: 2886 |
| Kahramanmaraş'ta<br>Meydana Gelen<br>Deprem Hk. Basın<br>Bülteni-33 | Response\Psychosocial support | 1 | 1 | 1 | 1: 2888 | 1: 2898 |
| Kahramanmaraş'ta<br>Meydana Gelen<br>Deprem Hk. Basın<br>Bülteni-33 | Response\Psychosocial support | 1 | 1 | 1 | 1: 2888 | 1: 2898 |
| Kahramanmaraş'ta<br>Meydana Gelen<br>Deprem Hk. Basın<br>Bülteni-33 | Response\Welfare service      | 1 | 1 | 1 | 1: 2922 | 1: 2934 |
| Kahramanmaraş'ta<br>Meydana Gelen<br>Deprem Hk. Basın<br>Bülteni-33 | Response\Welfare service      | 1 | 1 | 1 | 1: 2922 | 1: 2934 |

|                                                                     |                               |   |   |   |         |         |
|---------------------------------------------------------------------|-------------------------------|---|---|---|---------|---------|
| Kahramanmaraş'ta<br>Meydana Gelen<br>Deprem Hk. Basın<br>Bülteni-33 | Kahramanmaraş                 | 1 | 0 | 0 | 1: 2945 | 1: 2957 |
| Kahramanmaraş'ta<br>Meydana Gelen<br>Deprem Hk. Basın<br>Bülteni-33 | Pazarcık                      | 0 | 1 | 0 | 1: 2945 | 1: 2957 |
| Kahramanmaraş'ta<br>Meydana Gelen<br>Deprem Hk. Basın<br>Bülteni-33 | Earthquake                    | 1 | 1 | 1 | 1: 3020 | 1: 3025 |
| Kahramanmaraş'ta<br>Meydana Gelen<br>Deprem Hk. Basın<br>Bülteni-33 | Earthquake                    | 1 | 1 | 1 | 1: 3020 | 1: 3025 |
| Kahramanmaraş'ta<br>Meydana Gelen<br>Deprem Hk. Basın<br>Bülteni-33 | Response\Number of staff      | 1 | 0 | 0 | 1: 3050 | 1: 3064 |
| Kahramanmaraş'ta<br>Meydana Gelen<br>Deprem Hk. Basın<br>Bülteni-33 | Response\Number               | 0 | 1 | 0 | 1: 3050 | 1: 3064 |
| Kahramanmaraş'ta<br>Meydana Gelen<br>Deprem Hk. Basın<br>Bülteni-33 | Earthquake                    | 1 | 1 | 1 | 1: 3073 | 1: 3078 |
| Kahramanmaraş'ta<br>Meydana Gelen<br>Deprem Hk. Basın<br>Bülteni-33 | Earthquake                    | 1 | 1 | 1 | 1: 3073 | 1: 3078 |
| Kahramanmaraş'ta<br>Meydana Gelen<br>Deprem Hk. Basın<br>Bülteni-33 | Earthquake                    | 1 | 1 | 1 | 1: 3142 | 1: 3147 |
| Kahramanmaraş'ta<br>Meydana Gelen<br>Deprem Hk. Basın<br>Bülteni-33 | Earthquake                    | 1 | 1 | 1 | 1: 3142 | 1: 3147 |
| Kahramanmaraş'ta<br>Meydana Gelen<br>Deprem Hk. Basın<br>Bülteni-33 | Earthquake                    | 1 | 1 | 1 | 1: 3169 | 1: 3174 |
| Kahramanmaraş'ta<br>Meydana Gelen<br>Deprem Hk. Basın<br>Bülteni-33 | Earthquake                    | 1 | 1 | 1 | 1: 3169 | 1: 3174 |
| Kahramanmaraş'ta<br>Meydana Gelen<br>Deprem Hk. Basın<br>Bülteni-33 | Response\Psychosocial support | 1 | 1 | 1 | 1: 3236 | 1: 3246 |
| Kahramanmaraş'ta<br>Meydana Gelen<br>Deprem Hk. Basın<br>Bülteni-33 | Response\Psychosocial support | 1 | 1 | 1 | 1: 3236 | 1: 3246 |
| Kahramanmaraş'ta<br>Meydana Gelen<br>Deprem Hk. Basın<br>Bülteni-33 | Kahramanmaraş                 | 1 | 0 | 0 | 2: 17   | 2: 29   |
| Kahramanmaraş'ta<br>Meydana Gelen<br>Deprem Hk. Basın<br>Bülteni-33 | Pazarcık                      | 0 | 1 | 0 | 2: 17   | 2: 29   |
| Kahramanmaraş'ta<br>Meydana Gelen<br>Deprem Hk. Basın<br>Bülteni-33 | Earthquake                    | 1 | 1 | 1 | 2: 48   | 2: 53   |
| Kahramanmaraş'ta<br>Meydana Gelen<br>Deprem Hk. Basın<br>Bülteni-33 | Earthquake                    | 1 | 1 | 1 | 2: 48   | 2: 53   |
| Kahramanmaraş'ta<br>Meydana Gelen<br>Deprem Hk. Basın<br>Bülteni-33 | AFAD                          | 1 | 1 | 1 | 2: 92   | 2: 95   |
| Kahramanmaraş'ta<br>Meydana Gelen<br>Deprem Hk. Basın<br>Bülteni-33 | AFAD                          | 1 | 1 | 1 | 2: 92   | 2: 95   |

|                                                                     |                               |   |   |   |        |        |
|---------------------------------------------------------------------|-------------------------------|---|---|---|--------|--------|
| Kahramanmaraş'ta<br>Meydana Gelen<br>Deprem Hk. Basın<br>Bülteni-33 | Earthquake                    | 1 | 1 | 1 | 2: 134 | 2: 139 |
| Kahramanmaraş'ta<br>Meydana Gelen<br>Deprem Hk. Basın<br>Bülteni-33 | Earthquake                    | 1 | 1 | 1 | 2: 134 | 2: 139 |
| Kahramanmaraş'ta<br>Meydana Gelen<br>Deprem Hk. Basın<br>Bülteni-33 | Disaster                      | 1 | 1 | 1 | 2: 225 | 2: 228 |
| Kahramanmaraş'ta<br>Meydana Gelen<br>Deprem Hk. Basın<br>Bülteni-33 | Disaster                      | 1 | 1 | 1 | 2: 225 | 2: 228 |
| Kahramanmaraş'ta<br>Meydana Gelen<br>Deprem Hk. Basın<br>Bülteni-33 | Coordination\Public relations | 1 | 1 | 1 | 2: 274 | 2: 279 |
| Kahramanmaraş'ta<br>Meydana Gelen<br>Deprem Hk. Basın<br>Bülteni-33 | Coordination\Public relations | 1 | 1 | 1 | 2: 274 | 2: 279 |
| Kahramanmaraş'ta<br>Meydana Gelen<br>Deprem Hk. Basın<br>Bülteni-33 | AFAD                          | 1 | 1 | 1 | 2: 314 | 2: 317 |
| Kahramanmaraş'ta<br>Meydana Gelen<br>Deprem Hk. Basın<br>Bülteni-33 | AFAD                          | 1 | 1 | 1 | 2: 314 | 2: 317 |
| Kahramanmaraş'ta<br>Meydana Gelen<br>Deprem Hk. Basın<br>Bülteni-33 | AFAD                          | 1 | 1 | 1 | 2: 372 | 2: 375 |
| Kahramanmaraş'ta<br>Meydana Gelen<br>Deprem Hk. Basın<br>Bülteni-33 | AFAD                          | 1 | 1 | 1 | 2: 372 | 2: 375 |
| Kahramanmaraş'ta<br>Meydana Gelen<br>Deprem Hk. Basın<br>Bülteni-33 | AFAD                          | 1 | 1 | 1 | 2: 489 | 2: 492 |
| Kahramanmaraş'ta<br>Meydana Gelen<br>Deprem Hk. Basın<br>Bülteni-33 | AFAD                          | 1 | 1 | 1 | 2: 489 | 2: 492 |
| Kahramanmaraş'ta<br>Meydana Gelen<br>Deprem Hk. Basın<br>Bülteni-33 | Response\Search&Rescue        | 1 | 1 | 1 | 2: 583 | 2: 596 |
| Kahramanmaraş'ta<br>Meydana Gelen<br>Deprem Hk. Basın<br>Bülteni-33 | Response\Search&Rescue        | 1 | 1 | 1 | 2: 583 | 2: 596 |
| Kahramanmaraş'ta<br>Meydana Gelen<br>Deprem Hk. Basın<br>Bülteni-33 | Disaster                      | 1 | 1 | 1 | 2: 647 | 2: 650 |
| Kahramanmaraş'ta<br>Meydana Gelen<br>Deprem Hk. Basın<br>Bülteni-33 | Disaster                      | 1 | 1 | 1 | 2: 647 | 2: 650 |
| Kahramanmaraş'ta<br>Meydana Gelen<br>Deprem Hk. Basın<br>Bülteni-33 | AFAD                          | 1 | 1 | 1 | 2: 665 | 2: 668 |
| Kahramanmaraş'ta<br>Meydana Gelen<br>Deprem Hk. Basın<br>Bülteni-33 | AFAD                          | 1 | 1 | 1 | 2: 665 | 2: 668 |
| Kahramanmaraş'ta<br>Meydana Gelen<br>Deprem Hk. Basın<br>Bülteni-33 | Preparedness\Preparedness     | 1 | 1 | 1 | 2: 729 | 2: 739 |
| Kahramanmaraş'ta<br>Meydana Gelen<br>Deprem Hk. Basın<br>Bülteni-33 | Preparedness\Preparedness     | 1 | 1 | 1 | 2: 729 | 2: 739 |

|                                                                     |                                 |   |   |   |         |         |
|---------------------------------------------------------------------|---------------------------------|---|---|---|---------|---------|
| Kahramanmaraş'ta<br>Meydana Gelen<br>Deprem Hk. Basın<br>Bülteni-33 | Disaster                        | 1 | 1 | 1 | 2: 729  | 2: 732  |
| Kahramanmaraş'ta<br>Meydana Gelen<br>Deprem Hk. Basın<br>Bülteni-33 | Disaster                        | 1 | 1 | 1 | 2: 729  | 2: 732  |
| Kahramanmaraş'ta<br>Meydana Gelen<br>Deprem Hk. Basın<br>Bülteni-33 | Disaster                        | 1 | 1 | 1 | 2: 777  | 2: 780  |
| Kahramanmaraş'ta<br>Meydana Gelen<br>Deprem Hk. Basın<br>Bülteni-33 | Disaster                        | 1 | 1 | 1 | 2: 777  | 2: 780  |
| Kahramanmaraş'ta<br>Meydana Gelen<br>Deprem Hk. Basın<br>Bülteni-33 | Recovery\Fund drive             | 1 | 1 | 1 | 2: 838  | 2: 856  |
| Kahramanmaraş'ta<br>Meydana Gelen<br>Deprem Hk. Basın<br>Bülteni-33 | Recovery\Fund drive             | 1 | 1 | 1 | 2: 838  | 2: 856  |
| Kahramanmaraş'ta<br>Meydana Gelen<br>Deprem Hk. Basın<br>Bülteni-33 | Coordination\Social media       | 1 | 0 | 0 | 2: 954  | 2: 965  |
| Kahramanmaraş'ta<br>Meydana Gelen<br>Deprem Hk. Basın<br>Bülteni-33 | Coordination\Social media usage | 0 | 1 | 0 | 2: 954  | 2: 965  |
| Kahramanmaraş'ta<br>Meydana Gelen<br>Deprem Hk. Basın<br>Bülteni-33 | AFAD                            | 1 | 1 | 1 | 2: 1010 | 2: 1013 |
| Kahramanmaraş'ta<br>Meydana Gelen<br>Deprem Hk. Basın<br>Bülteni-33 | AFAD                            | 1 | 1 | 1 | 2: 1010 | 2: 1013 |
| Kahramanmaraş'ta<br>Meydana Gelen<br>Deprem Hk. Basın<br>Bülteni-33 | AFAD                            | 1 | 1 | 1 | 2: 1032 | 2: 1035 |
| Kahramanmaraş'ta<br>Meydana Gelen<br>Deprem Hk. Basın<br>Bülteni-33 | AFAD                            | 1 | 1 | 1 | 2: 1032 | 2: 1035 |
| Kahramanmaraş'ta<br>Meydana Gelen<br>Deprem Hk. Basın<br>Bülteni-33 | Coordination\Information        | 1 | 1 | 1 | 2: 1077 | 2: 1088 |
| Kahramanmaraş'ta<br>Meydana Gelen<br>Deprem Hk. Basın<br>Bülteni-33 | Coordination\Information        | 1 | 1 | 1 | 2: 1077 | 2: 1088 |
| Kahramanmaraş'ta<br>Meydana Gelen<br>Deprem Hk. Basın<br>Bülteni-33 | Recovery\Peacemaking            | 1 | 1 | 1 | 2: 1093 | 2: 1102 |
| Kahramanmaraş'ta<br>Meydana Gelen<br>Deprem Hk. Basın<br>Bülteni-33 | Recovery\Peacemaking            | 1 | 1 | 1 | 2: 1093 | 2: 1102 |
| Kahramanmaraş'ta<br>Meydana Gelen<br>Deprem Hk. Basın<br>Bülteni-33 | Coordination\Social media       | 1 | 0 | 0 | 2: 1149 | 2: 1160 |
| Kahramanmaraş'ta<br>Meydana Gelen<br>Deprem Hk. Basın<br>Bülteni-33 | Coordination\Social media usage | 0 | 1 | 0 | 2: 1149 | 2: 1160 |
| Kahramanmaraş'ta<br>Meydana Gelen<br>Deprem Hk. Basın<br>Bülteni-33 | Kahramanmaraş                   | 1 | 0 | 0 | 3: 17   | 3: 29   |
| Kahramanmaraş'ta<br>Meydana Gelen<br>Deprem Hk. Basın<br>Bülteni-33 | Pazarcık                        | 0 | 1 | 0 | 3: 17   | 3: 29   |



|                                                                     |               |   |   |   |        |        |
|---------------------------------------------------------------------|---------------|---|---|---|--------|--------|
| Kahramanmaraş'ta<br>Meydana Gelen<br>Deprem Hk. Basın<br>Bülteni-33 | Earthquake    | 1 | 1 | 1 | 3: 48  | 3: 53  |
| Kahramanmaraş'ta<br>Meydana Gelen<br>Deprem Hk. Basın<br>Bülteni-33 | Earthquake    | 1 | 1 | 1 | 3: 48  | 3: 53  |
| Kahramanmaraş'ta<br>Meydana Gelen<br>Deprem Hk. Basın<br>Bülteni-33 | AFAD          | 1 | 1 | 1 | 3: 92  | 3: 95  |
| Kahramanmaraş'ta<br>Meydana Gelen<br>Deprem Hk. Basın<br>Bülteni-33 | AFAD          | 1 | 1 | 1 | 3: 92  | 3: 95  |
| Kahramanmaraş'ta<br>Meydana Gelen<br>Deprem Hk. Basın<br>Bülteni-33 | Earthquake    | 1 | 1 | 1 | 3: 134 | 3: 139 |
| Kahramanmaraş'ta<br>Meydana Gelen<br>Deprem Hk. Basın<br>Bülteni-33 | Earthquake    | 1 | 1 | 1 | 3: 134 | 3: 139 |
| Kahramanmaraş'ta<br>Meydana Gelen<br>Deprem Hk. Basın<br>Bülteni-33 | Disaster      | 1 | 1 | 1 | 3: 200 | 3: 203 |
| Kahramanmaraş'ta<br>Meydana Gelen<br>Deprem Hk. Basın<br>Bülteni-33 | Disaster      | 1 | 1 | 1 | 3: 200 | 3: 203 |
| Kahramanmaraş'ta<br>Meydana Gelen<br>Deprem Hk. Basın<br>Bülteni-33 | Emergency     | 1 | 1 | 1 | 3: 208 | 3: 217 |
| Kahramanmaraş'ta<br>Meydana Gelen<br>Deprem Hk. Basın<br>Bülteni-33 | Emergency     | 1 | 1 | 1 | 3: 208 | 3: 217 |
| Kahramanmaraş'ta<br>Meydana Gelen<br>Deprem Hk. Basın<br>Bülteni-36 | Kahramanmaraş | 1 | 0 | 0 | 1: 17  | 1: 29  |
| Kahramanmaraş'ta<br>Meydana Gelen<br>Deprem Hk. Basın<br>Bülteni-36 | Pazarcık      | 0 | 1 | 0 | 1: 17  | 1: 29  |
| Kahramanmaraş'ta<br>Meydana Gelen<br>Deprem Hk. Basın<br>Bülteni-36 | Earthquake    | 1 | 1 | 1 | 1: 48  | 1: 53  |
| Kahramanmaraş'ta<br>Meydana Gelen<br>Deprem Hk. Basın<br>Bülteni-36 | Earthquake    | 1 | 1 | 1 | 1: 48  | 1: 53  |
| Kahramanmaraş'ta<br>Meydana Gelen<br>Deprem Hk. Basın<br>Bülteni-36 | AFAD          | 1 | 1 | 1 | 1: 92  | 1: 95  |
| Kahramanmaraş'ta<br>Meydana Gelen<br>Deprem Hk. Basın<br>Bülteni-36 | AFAD          | 1 | 1 | 1 | 1: 92  | 1: 95  |
| Kahramanmaraş'ta<br>Meydana Gelen<br>Deprem Hk. Basın<br>Bülteni-36 | Earthquake    | 1 | 1 | 1 | 1: 134 | 1: 139 |
| Kahramanmaraş'ta<br>Meydana Gelen<br>Deprem Hk. Basın<br>Bülteni-36 | Earthquake    | 1 | 1 | 1 | 1: 134 | 1: 139 |
| Kahramanmaraş'ta<br>Meydana Gelen<br>Deprem Hk. Basın<br>Bülteni-36 | Kahramanmaraş | 1 | 0 | 0 | 1: 155 | 1: 167 |
| Kahramanmaraş'ta<br>Meydana Gelen<br>Deprem Hk. Basın<br>Bülteni-36 | Pazarcık      | 0 | 1 | 0 | 1: 155 | 1: 167 |

|                                                                     |                         |   |   |   |        |        |
|---------------------------------------------------------------------|-------------------------|---|---|---|--------|--------|
| Kahramanmaraş'ta<br>Meydana Gelen<br>Deprem Hk. Basın<br>Bülteni-36 | Earthquake              | 1 | 1 | 1 | 1: 186 | 1: 191 |
| Kahramanmaraş'ta<br>Meydana Gelen<br>Deprem Hk. Basın<br>Bülteni-36 | Earthquake              | 1 | 1 | 1 | 1: 186 | 1: 191 |
| Kahramanmaraş'ta<br>Meydana Gelen<br>Deprem Hk. Basın<br>Bülteni-36 | Kahramanmaraş           | 1 | 0 | 0 | 1: 268 | 1: 280 |
| Kahramanmaraş'ta<br>Meydana Gelen<br>Deprem Hk. Basın<br>Bülteni-36 | Pazarcık                | 0 | 1 | 0 | 1: 268 | 1: 280 |
| Kahramanmaraş'ta<br>Meydana Gelen<br>Deprem Hk. Basın<br>Bülteni-36 | Earthquake              | 1 | 1 | 1 | 1: 299 | 1: 304 |
| Kahramanmaraş'ta<br>Meydana Gelen<br>Deprem Hk. Basın<br>Bülteni-36 | Earthquake              | 1 | 1 | 1 | 1: 299 | 1: 304 |
| Kahramanmaraş'ta<br>Meydana Gelen<br>Deprem Hk. Basın<br>Bülteni-36 | Kahramanmaraş           | 1 | 0 | 0 | 1: 340 | 1: 352 |
| Kahramanmaraş'ta<br>Meydana Gelen<br>Deprem Hk. Basın<br>Bülteni-36 | Pazarcık                | 0 | 1 | 0 | 1: 340 | 1: 352 |
| Kahramanmaraş'ta<br>Meydana Gelen<br>Deprem Hk. Basın<br>Bülteni-36 | Earthquake              | 1 | 1 | 1 | 1: 435 | 1: 440 |
| Kahramanmaraş'ta<br>Meydana Gelen<br>Deprem Hk. Basın<br>Bülteni-36 | Earthquake              | 1 | 1 | 1 | 1: 435 | 1: 440 |
| Kahramanmaraş'ta<br>Meydana Gelen<br>Deprem Hk. Basın<br>Bülteni-36 | Earthquake              | 1 | 1 | 1 | 1: 462 | 1: 467 |
| Kahramanmaraş'ta<br>Meydana Gelen<br>Deprem Hk. Basın<br>Bülteni-36 | Earthquake              | 1 | 1 | 1 | 1: 462 | 1: 467 |
| Kahramanmaraş'ta<br>Meydana Gelen<br>Deprem Hk. Basın<br>Bülteni-36 | Earthquake              | 1 | 1 | 1 | 1: 496 | 1: 501 |
| Kahramanmaraş'ta<br>Meydana Gelen<br>Deprem Hk. Basın<br>Bülteni-36 | Earthquake              | 1 | 1 | 1 | 1: 496 | 1: 501 |
| Kahramanmaraş'ta<br>Meydana Gelen<br>Deprem Hk. Basın<br>Bülteni-36 | Kahramanmaraş           | 1 | 0 | 0 | 1: 593 | 1: 605 |
| Kahramanmaraş'ta<br>Meydana Gelen<br>Deprem Hk. Basın<br>Bülteni-36 | Pazarcık                | 0 | 1 | 0 | 1: 593 | 1: 605 |
| Kahramanmaraş'ta<br>Meydana Gelen<br>Deprem Hk. Basın<br>Bülteni-36 | Response\Military       | 1 | 1 | 1 | 1: 705 | 1: 712 |
| Kahramanmaraş'ta<br>Meydana Gelen<br>Deprem Hk. Basın<br>Bülteni-36 | Response\Military       | 1 | 1 | 1 | 1: 705 | 1: 712 |
| Kahramanmaraş'ta<br>Meydana Gelen<br>Deprem Hk. Basın<br>Bülteni-36 | Shelter&meal\Evacuation | 1 | 1 | 1 | 1: 756 | 1: 762 |
| Kahramanmaraş'ta<br>Meydana Gelen<br>Deprem Hk. Basın<br>Bülteni-36 | Shelter&meal\Evacuation | 1 | 1 | 1 | 1: 756 | 1: 762 |

|                                                                     |                           |   |   |   |         |         |
|---------------------------------------------------------------------|---------------------------|---|---|---|---------|---------|
| Kahramanmaraş'ta<br>Meydana Gelen<br>Deprem Hk. Basın<br>Bülteni-36 | AFAD                      | 1 | 1 | 1 | 1: 889  | 1: 892  |
| Kahramanmaraş'ta<br>Meydana Gelen<br>Deprem Hk. Basın<br>Bülteni-36 | AFAD                      | 1 | 1 | 1 | 1: 889  | 1: 892  |
| Kahramanmaraş'ta<br>Meydana Gelen<br>Deprem Hk. Basın<br>Bülteni-36 | Response\Coast guard&Navy | 1 | 1 | 1 | 1: 918  | 1: 931  |
| Kahramanmaraş'ta<br>Meydana Gelen<br>Deprem Hk. Basın<br>Bülteni-36 | Response\Coast guard&Navy | 1 | 1 | 1 | 1: 918  | 1: 931  |
| Kahramanmaraş'ta<br>Meydana Gelen<br>Deprem Hk. Basın<br>Bülteni-36 | Response\Number of staff  | 1 | 0 | 0 | 1: 995  | 1: 1017 |
| Kahramanmaraş'ta<br>Meydana Gelen<br>Deprem Hk. Basın<br>Bülteni-36 | Response\Search&Rescue    | 1 | 1 | 1 | 1: 995  | 1: 1008 |
| Kahramanmaraş'ta<br>Meydana Gelen<br>Deprem Hk. Basın<br>Bülteni-36 | Response\Search&Rescue    | 1 | 1 | 1 | 1: 995  | 1: 1008 |
| Kahramanmaraş'ta<br>Meydana Gelen<br>Deprem Hk. Basın<br>Bülteni-36 | Response\Number           | 0 | 1 | 0 | 1: 995  | 1: 1017 |
| Kahramanmaraş'ta<br>Meydana Gelen<br>Deprem Hk. Basın<br>Bülteni-36 | Response\Number of staff  | 1 | 0 | 0 | 1: 1045 | 1: 1067 |
| Kahramanmaraş'ta<br>Meydana Gelen<br>Deprem Hk. Basın<br>Bülteni-36 | Response\Search&Rescue    | 1 | 1 | 1 | 1: 1045 | 1: 1058 |
| Kahramanmaraş'ta<br>Meydana Gelen<br>Deprem Hk. Basın<br>Bülteni-36 | Response\Search&Rescue    | 1 | 1 | 1 | 1: 1045 | 1: 1058 |
| Kahramanmaraş'ta<br>Meydana Gelen<br>Deprem Hk. Basın<br>Bülteni-36 | Response\Number           | 0 | 1 | 0 | 1: 1045 | 1: 1067 |
| Kahramanmaraş'ta<br>Meydana Gelen<br>Deprem Hk. Basın<br>Bülteni-36 | AFAD                      | 1 | 1 | 1 | 1: 1097 | 1: 1100 |
| Kahramanmaraş'ta<br>Meydana Gelen<br>Deprem Hk. Basın<br>Bülteni-36 | AFAD                      | 1 | 1 | 1 | 1: 1097 | 1: 1100 |
| Kahramanmaraş'ta<br>Meydana Gelen<br>Deprem Hk. Basın<br>Bülteni-36 | Response\Military         | 1 | 1 | 1 | 1: 1112 | 1: 1119 |
| Kahramanmaraş'ta<br>Meydana Gelen<br>Deprem Hk. Basın<br>Bülteni-36 | Response\Military         | 1 | 1 | 1 | 1: 1112 | 1: 1119 |
| Kahramanmaraş'ta<br>Meydana Gelen<br>Deprem Hk. Basın<br>Bülteni-36 | Response\Number of staff  | 1 | 0 | 0 | 1: 1255 | 1: 1269 |
| Kahramanmaraş'ta<br>Meydana Gelen<br>Deprem Hk. Basın<br>Bülteni-36 | Response\Number           | 0 | 1 | 0 | 1: 1255 | 1: 1269 |
| Kahramanmaraş'ta<br>Meydana Gelen<br>Deprem Hk. Basın<br>Bülteni-36 | Response\Number of staff  | 1 | 0 | 0 | 1: 1311 | 1: 1325 |
| Kahramanmaraş'ta<br>Meydana Gelen<br>Deprem Hk. Basın<br>Bülteni-36 | Response\Number           | 0 | 1 | 0 | 1: 1311 | 1: 1325 |

|                                                                     |                           |   |   |   |         |         |
|---------------------------------------------------------------------|---------------------------|---|---|---|---------|---------|
| Kahramanmaraş'ta<br>Meydana Gelen<br>Deprem Hk. Basın<br>Bülteni-36 | Disaster                  | 1 | 1 | 1 | 1: 1341 | 1: 1344 |
| Kahramanmaraş'ta<br>Meydana Gelen<br>Deprem Hk. Basın<br>Bülteni-36 | Disaster                  | 1 | 1 | 1 | 1: 1341 | 1: 1344 |
| Kahramanmaraş'ta<br>Meydana Gelen<br>Deprem Hk. Basın<br>Bülteni-36 | Disaster                  | 1 | 1 | 1 | 1: 1517 | 1: 1520 |
| Kahramanmaraş'ta<br>Meydana Gelen<br>Deprem Hk. Basın<br>Bülteni-36 | Disaster                  | 1 | 1 | 1 | 1: 1517 | 1: 1520 |
| Kahramanmaraş'ta<br>Meydana Gelen<br>Deprem Hk. Basın<br>Bülteni-36 | AFAD                      | 1 | 1 | 1 | 1: 1569 | 1: 1572 |
| Kahramanmaraş'ta<br>Meydana Gelen<br>Deprem Hk. Basın<br>Bülteni-36 | AFAD                      | 1 | 1 | 1 | 1: 1569 | 1: 1572 |
| Kahramanmaraş'ta<br>Meydana Gelen<br>Deprem Hk. Basın<br>Bülteni-36 | Coordination\Coordination | 1 | 1 | 1 | 1: 1661 | 1: 1672 |
| Kahramanmaraş'ta<br>Meydana Gelen<br>Deprem Hk. Basın<br>Bülteni-36 | Coordination\Coordination | 1 | 1 | 1 | 1: 1661 | 1: 1672 |
| Kahramanmaraş'ta<br>Meydana Gelen<br>Deprem Hk. Basın<br>Bülteni-36 | Response\Coast guard&Navy | 1 | 1 | 1 | 1: 1847 | 1: 1862 |
| Kahramanmaraş'ta<br>Meydana Gelen<br>Deprem Hk. Basın<br>Bülteni-36 | Response\Coast guard&Navy | 1 | 1 | 1 | 1: 1847 | 1: 1862 |
| Kahramanmaraş'ta<br>Meydana Gelen<br>Deprem Hk. Basın<br>Bülteni-36 | Response\Coast guard&Navy | 1 | 1 | 1 | 1: 1865 | 1: 1878 |
| Kahramanmaraş'ta<br>Meydana Gelen<br>Deprem Hk. Basın<br>Bülteni-36 | Response\Coast guard&Navy | 1 | 1 | 1 | 1: 1865 | 1: 1878 |
| Kahramanmaraş'ta<br>Meydana Gelen<br>Deprem Hk. Basın<br>Bülteni-36 | Response\Military         | 1 | 1 | 1 | 1: 1894 | 1: 1901 |
| Kahramanmaraş'ta<br>Meydana Gelen<br>Deprem Hk. Basın<br>Bülteni-36 | Response\Military         | 1 | 1 | 1 | 1: 1894 | 1: 1901 |
| Kahramanmaraş'ta<br>Meydana Gelen<br>Deprem Hk. Basın<br>Bülteni-36 | Shelter&meal\Evacuation   | 1 | 1 | 1 | 1: 2123 | 1: 2129 |
| Kahramanmaraş'ta<br>Meydana Gelen<br>Deprem Hk. Basın<br>Bülteni-36 | Shelter&meal\Evacuation   | 1 | 1 | 1 | 1: 2123 | 1: 2129 |
| Kahramanmaraş'ta<br>Meydana Gelen<br>Deprem Hk. Basın<br>Bülteni-36 | Response\Coast guard&Navy | 1 | 1 | 1 | 1: 2167 | 1: 2180 |
| Kahramanmaraş'ta<br>Meydana Gelen<br>Deprem Hk. Basın<br>Bülteni-36 | Response\Coast guard&Navy | 1 | 1 | 1 | 1: 2167 | 1: 2180 |
| Kahramanmaraş'ta<br>Meydana Gelen<br>Deprem Hk. Basın<br>Bülteni-36 | Disaster                  | 1 | 1 | 1 | 1: 2241 | 1: 2244 |
| Kahramanmaraş'ta<br>Meydana Gelen<br>Deprem Hk. Basın<br>Bülteni-36 | Disaster                  | 1 | 1 | 1 | 1: 2241 | 1: 2244 |

|                                                                     |                         |   |   |   |         |         |
|---------------------------------------------------------------------|-------------------------|---|---|---|---------|---------|
| Kahramanmaraş'ta<br>Meydana Gelen<br>Deprem Hk. Basın<br>Bülteni-36 | Shelter&meal\Sheltering | 1 | 1 | 1 | 1: 2246 | 1: 2252 |
| Kahramanmaraş'ta<br>Meydana Gelen<br>Deprem Hk. Basın<br>Bülteni-36 | Shelter&meal\Sheltering | 1 | 1 | 1 | 1: 2246 | 1: 2252 |
| Kahramanmaraş'ta<br>Meydana Gelen<br>Deprem Hk. Basın<br>Bülteni-36 | Shelter&meal\Tent       | 1 | 1 | 1 | 1: 2269 | 1: 2273 |
| Kahramanmaraş'ta<br>Meydana Gelen<br>Deprem Hk. Basın<br>Bülteni-36 | Shelter&meal\Tent       | 1 | 1 | 1 | 1: 2269 | 1: 2273 |
| Kahramanmaraş'ta<br>Meydana Gelen<br>Deprem Hk. Basın<br>Bülteni-36 | Shelter&meal\Tent       | 1 | 1 | 1 | 1: 2334 | 1: 2338 |
| Kahramanmaraş'ta<br>Meydana Gelen<br>Deprem Hk. Basın<br>Bülteni-36 | Shelter&meal\Tent       | 1 | 1 | 1 | 1: 2334 | 1: 2338 |
| Kahramanmaraş'ta<br>Meydana Gelen<br>Deprem Hk. Basın<br>Bülteni-36 | Shelter&meal\Container  | 1 | 1 | 1 | 1: 2386 | 1: 2394 |
| Kahramanmaraş'ta<br>Meydana Gelen<br>Deprem Hk. Basın<br>Bülteni-36 | Shelter&meal\Container  | 1 | 1 | 1 | 1: 2386 | 1: 2394 |
| Kahramanmaraş'ta<br>Meydana Gelen<br>Deprem Hk. Basın<br>Bülteni-36 | Disaster                | 1 | 1 | 1 | 1: 2433 | 1: 2436 |
| Kahramanmaraş'ta<br>Meydana Gelen<br>Deprem Hk. Basın<br>Bülteni-36 | Disaster                | 1 | 1 | 1 | 1: 2433 | 1: 2436 |
| Kahramanmaraş'ta<br>Meydana Gelen<br>Deprem Hk. Basın<br>Bülteni-36 | Disaster                | 1 | 1 | 1 | 1: 2452 | 1: 2455 |
| Kahramanmaraş'ta<br>Meydana Gelen<br>Deprem Hk. Basın<br>Bülteni-36 | Disaster                | 1 | 1 | 1 | 1: 2452 | 1: 2455 |
| Kahramanmaraş'ta<br>Meydana Gelen<br>Deprem Hk. Basın<br>Bülteni-36 | Shelter&meal\Tent       | 1 | 1 | 1 | 1: 2474 | 1: 2478 |
| Kahramanmaraş'ta<br>Meydana Gelen<br>Deprem Hk. Basın<br>Bülteni-36 | Shelter&meal\Tent       | 1 | 1 | 1 | 1: 2474 | 1: 2478 |
| Kahramanmaraş'ta<br>Meydana Gelen<br>Deprem Hk. Basın<br>Bülteni-36 | Shelter&meal\Container  | 1 | 1 | 1 | 1: 2481 | 1: 2489 |
| Kahramanmaraş'ta<br>Meydana Gelen<br>Deprem Hk. Basın<br>Bülteni-36 | Shelter&meal\Container  | 1 | 1 | 1 | 1: 2481 | 1: 2489 |
| Kahramanmaraş'ta<br>Meydana Gelen<br>Deprem Hk. Basın<br>Bülteni-36 | Shelter&meal\Sheltering | 1 | 1 | 1 | 1: 2571 | 1: 2577 |
| Kahramanmaraş'ta<br>Meydana Gelen<br>Deprem Hk. Basın<br>Bülteni-36 | Shelter&meal\Sheltering | 1 | 1 | 1 | 1: 2571 | 1: 2577 |
| Kahramanmaraş'ta<br>Meydana Gelen<br>Deprem Hk. Basın<br>Bülteni-36 | Disaster                | 1 | 1 | 1 | 1: 2624 | 1: 2627 |
| Kahramanmaraş'ta<br>Meydana Gelen<br>Deprem Hk. Basın<br>Bülteni-36 | Disaster                | 1 | 1 | 1 | 1: 2624 | 1: 2627 |

|                                                                     |                               |   |   |   |         |         |
|---------------------------------------------------------------------|-------------------------------|---|---|---|---------|---------|
| Kahramanmaraş'ta<br>Meydana Gelen<br>Deprem Hk. Basın<br>Bülteni-36 | AFAD                          | 1 | 1 | 1 | 1: 2659 | 1: 2662 |
| Kahramanmaraş'ta<br>Meydana Gelen<br>Deprem Hk. Basın<br>Bülteni-36 | AFAD                          | 1 | 1 | 1 | 1: 2659 | 1: 2662 |
| Kahramanmaraş'ta<br>Meydana Gelen<br>Deprem Hk. Basın<br>Bülteni-36 | Response\Military             | 1 | 1 | 1 | 1: 2670 | 1: 2677 |
| Kahramanmaraş'ta<br>Meydana Gelen<br>Deprem Hk. Basın<br>Bülteni-36 | Response\Military             | 1 | 1 | 1 | 1: 2670 | 1: 2677 |
| Kahramanmaraş'ta<br>Meydana Gelen<br>Deprem Hk. Basın<br>Bülteni-36 | Coordination\NGO              | 1 | 1 | 1 | 1: 2682 | 1: 2693 |
| Kahramanmaraş'ta<br>Meydana Gelen<br>Deprem Hk. Basın<br>Bülteni-36 | Coordination\NGO              | 1 | 1 | 1 | 1: 2682 | 1: 2693 |
| Kahramanmaraş'ta<br>Meydana Gelen<br>Deprem Hk. Basın<br>Bülteni-36 | Shelter&meal\Mobile kitchen   | 1 | 1 | 1 | 1: 2730 | 1: 2741 |
| Kahramanmaraş'ta<br>Meydana Gelen<br>Deprem Hk. Basın<br>Bülteni-36 | Shelter&meal\Mobile kitchen   | 1 | 1 | 1 | 1: 2730 | 1: 2741 |
| Kahramanmaraş'ta<br>Meydana Gelen<br>Deprem Hk. Basın<br>Bülteni-36 | Disaster                      | 1 | 1 | 1 | 1: 2769 | 1: 2772 |
| Kahramanmaraş'ta<br>Meydana Gelen<br>Deprem Hk. Basın<br>Bülteni-36 | Disaster                      | 1 | 1 | 1 | 1: 2769 | 1: 2772 |
| Kahramanmaraş'ta<br>Meydana Gelen<br>Deprem Hk. Basın<br>Bülteni-36 | Shelter&meal\Hot meal         | 1 | 1 | 1 | 1: 2796 | 1: 2806 |
| Kahramanmaraş'ta<br>Meydana Gelen<br>Deprem Hk. Basın<br>Bülteni-36 | Shelter&meal\Hot meal         | 1 | 1 | 1 | 1: 2796 | 1: 2806 |
| Kahramanmaraş'ta<br>Meydana Gelen<br>Deprem Hk. Basın<br>Bülteni-36 | Disaster                      | 1 | 1 | 1 | 1: 2938 | 1: 2941 |
| Kahramanmaraş'ta<br>Meydana Gelen<br>Deprem Hk. Basın<br>Bülteni-36 | Disaster                      | 1 | 1 | 1 | 1: 2938 | 1: 2941 |
| Kahramanmaraş'ta<br>Meydana Gelen<br>Deprem Hk. Basın<br>Bülteni-36 | Response\Psychosocial support | 1 | 1 | 1 | 1: 2943 | 1: 2953 |
| Kahramanmaraş'ta<br>Meydana Gelen<br>Deprem Hk. Basın<br>Bülteni-36 | Response\Psychosocial support | 1 | 1 | 1 | 1: 2943 | 1: 2953 |
| Kahramanmaraş'ta<br>Meydana Gelen<br>Deprem Hk. Basın<br>Bülteni-36 | Kahramanmaraş                 | 1 | 0 | 0 | 2: 17   | 2: 29   |
| Kahramanmaraş'ta<br>Meydana Gelen<br>Deprem Hk. Basın<br>Bülteni-36 | Pazarcık                      | 0 | 1 | 0 | 2: 17   | 2: 29   |
| Kahramanmaraş'ta<br>Meydana Gelen<br>Deprem Hk. Basın<br>Bülteni-36 | Earthquake                    | 1 | 1 | 1 | 2: 48   | 2: 53   |
| Kahramanmaraş'ta<br>Meydana Gelen<br>Deprem Hk. Basın<br>Bülteni-36 | Earthquake                    | 1 | 1 | 1 | 2: 48   | 2: 53   |

|                                                                     |                               |   |   |   |        |        |
|---------------------------------------------------------------------|-------------------------------|---|---|---|--------|--------|
| Kahramanmaraş'ta<br>Meydana Gelen<br>Deprem Hk. Basın<br>Bülteni-36 | AFAD                          | 1 | 1 | 1 | 2: 92  | 2: 95  |
| Kahramanmaraş'ta<br>Meydana Gelen<br>Deprem Hk. Basın<br>Bülteni-36 | AFAD                          | 1 | 1 | 1 | 2: 92  | 2: 95  |
| Kahramanmaraş'ta<br>Meydana Gelen<br>Deprem Hk. Basın<br>Bülteni-36 | Earthquake                    | 1 | 1 | 1 | 2: 134 | 2: 139 |
| Kahramanmaraş'ta<br>Meydana Gelen<br>Deprem Hk. Basın<br>Bülteni-36 | Earthquake                    | 1 | 1 | 1 | 2: 134 | 2: 139 |
| Kahramanmaraş'ta<br>Meydana Gelen<br>Deprem Hk. Basın<br>Bülteni-36 | Response\Welfare service      | 1 | 1 | 1 | 2: 163 | 2: 175 |
| Kahramanmaraş'ta<br>Meydana Gelen<br>Deprem Hk. Basın<br>Bülteni-36 | Response\Welfare service      | 1 | 1 | 1 | 2: 163 | 2: 175 |
| Kahramanmaraş'ta<br>Meydana Gelen<br>Deprem Hk. Basın<br>Bülteni-36 | Kahramanmaraş                 | 1 | 0 | 0 | 2: 186 | 2: 198 |
| Kahramanmaraş'ta<br>Meydana Gelen<br>Deprem Hk. Basın<br>Bülteni-36 | Pazarcık                      | 0 | 1 | 0 | 2: 186 | 2: 198 |
| Kahramanmaraş'ta<br>Meydana Gelen<br>Deprem Hk. Basın<br>Bülteni-36 | Earthquake                    | 1 | 1 | 1 | 2: 261 | 2: 266 |
| Kahramanmaraş'ta<br>Meydana Gelen<br>Deprem Hk. Basın<br>Bülteni-36 | Earthquake                    | 1 | 1 | 1 | 2: 261 | 2: 266 |
| Kahramanmaraş'ta<br>Meydana Gelen<br>Deprem Hk. Basın<br>Bülteni-36 | Response\Number of staff      | 1 | 0 | 0 | 2: 291 | 2: 305 |
| Kahramanmaraş'ta<br>Meydana Gelen<br>Deprem Hk. Basın<br>Bülteni-36 | Response\Number               | 0 | 1 | 0 | 2: 291 | 2: 305 |
| Kahramanmaraş'ta<br>Meydana Gelen<br>Deprem Hk. Basın<br>Bülteni-36 | Earthquake                    | 1 | 1 | 1 | 2: 314 | 2: 319 |
| Kahramanmaraş'ta<br>Meydana Gelen<br>Deprem Hk. Basın<br>Bülteni-36 | Earthquake                    | 1 | 1 | 1 | 2: 314 | 2: 319 |
| Kahramanmaraş'ta<br>Meydana Gelen<br>Deprem Hk. Basın<br>Bülteni-36 | Earthquake                    | 1 | 1 | 1 | 2: 383 | 2: 388 |
| Kahramanmaraş'ta<br>Meydana Gelen<br>Deprem Hk. Basın<br>Bülteni-36 | Earthquake                    | 1 | 1 | 1 | 2: 383 | 2: 388 |
| Kahramanmaraş'ta<br>Meydana Gelen<br>Deprem Hk. Basın<br>Bülteni-36 | Earthquake                    | 1 | 1 | 1 | 2: 410 | 2: 415 |
| Kahramanmaraş'ta<br>Meydana Gelen<br>Deprem Hk. Basın<br>Bülteni-36 | Earthquake                    | 1 | 1 | 1 | 2: 410 | 2: 415 |
| Kahramanmaraş'ta<br>Meydana Gelen<br>Deprem Hk. Basın<br>Bülteni-36 | Response\Psychosocial support | 1 | 1 | 1 | 2: 478 | 2: 488 |
| Kahramanmaraş'ta<br>Meydana Gelen<br>Deprem Hk. Basın<br>Bülteni-36 | Response\Psychosocial support | 1 | 1 | 1 | 2: 478 | 2: 488 |

|                                                                     |                               |   |   |   |         |         |
|---------------------------------------------------------------------|-------------------------------|---|---|---|---------|---------|
| Kahramanmaraş'ta<br>Meydana Gelen<br>Deprem Hk. Basın<br>Bülteni-36 | Disaster                      | 1 | 1 | 1 | 2: 667  | 2: 670  |
| Kahramanmaraş'ta<br>Meydana Gelen<br>Deprem Hk. Basın<br>Bülteni-36 | Disaster                      | 1 | 1 | 1 | 2: 667  | 2: 670  |
| Kahramanmaraş'ta<br>Meydana Gelen<br>Deprem Hk. Basın<br>Bülteni-36 | Coordination\Public relations | 1 | 1 | 1 | 2: 796  | 2: 801  |
| Kahramanmaraş'ta<br>Meydana Gelen<br>Deprem Hk. Basın<br>Bülteni-36 | Coordination\Public relations | 1 | 1 | 1 | 2: 796  | 2: 801  |
| Kahramanmaraş'ta<br>Meydana Gelen<br>Deprem Hk. Basın<br>Bülteni-36 | AFAD                          | 1 | 1 | 1 | 2: 836  | 2: 839  |
| Kahramanmaraş'ta<br>Meydana Gelen<br>Deprem Hk. Basın<br>Bülteni-36 | AFAD                          | 1 | 1 | 1 | 2: 836  | 2: 839  |
| Kahramanmaraş'ta<br>Meydana Gelen<br>Deprem Hk. Basın<br>Bülteni-36 | AFAD                          | 1 | 1 | 1 | 2: 894  | 2: 897  |
| Kahramanmaraş'ta<br>Meydana Gelen<br>Deprem Hk. Basın<br>Bülteni-36 | AFAD                          | 1 | 1 | 1 | 2: 894  | 2: 897  |
| Kahramanmaraş'ta<br>Meydana Gelen<br>Deprem Hk. Basın<br>Bülteni-36 | AFAD                          | 1 | 1 | 1 | 2: 1011 | 2: 1014 |
| Kahramanmaraş'ta<br>Meydana Gelen<br>Deprem Hk. Basın<br>Bülteni-36 | AFAD                          | 1 | 1 | 1 | 2: 1011 | 2: 1014 |
| Kahramanmaraş'ta<br>Meydana Gelen<br>Deprem Hk. Basın<br>Bülteni-36 | Response\Search&Rescue        | 1 | 1 | 1 | 2: 1105 | 2: 1118 |
| Kahramanmaraş'ta<br>Meydana Gelen<br>Deprem Hk. Basın<br>Bülteni-36 | Response\Search&Rescue        | 1 | 1 | 1 | 2: 1105 | 2: 1118 |
| Kahramanmaraş'ta<br>Meydana Gelen<br>Deprem Hk. Basın<br>Bülteni-36 | Disaster                      | 1 | 1 | 1 | 2: 1169 | 2: 1172 |
| Kahramanmaraş'ta<br>Meydana Gelen<br>Deprem Hk. Basın<br>Bülteni-36 | Disaster                      | 1 | 1 | 1 | 2: 1169 | 2: 1172 |
| Kahramanmaraş'ta<br>Meydana Gelen<br>Deprem Hk. Basın<br>Bülteni-36 | AFAD                          | 1 | 1 | 1 | 2: 1187 | 2: 1190 |
| Kahramanmaraş'ta<br>Meydana Gelen<br>Deprem Hk. Basın<br>Bülteni-36 | AFAD                          | 1 | 1 | 1 | 2: 1187 | 2: 1190 |
| Kahramanmaraş'ta<br>Meydana Gelen<br>Deprem Hk. Basın<br>Bülteni-36 | Preparedness\Preparedness     | 1 | 1 | 1 | 2: 1270 | 2: 1280 |
| Kahramanmaraş'ta<br>Meydana Gelen<br>Deprem Hk. Basın<br>Bülteni-36 | Preparedness\Preparedness     | 1 | 1 | 1 | 2: 1270 | 2: 1280 |
| Kahramanmaraş'ta<br>Meydana Gelen<br>Deprem Hk. Basın<br>Bülteni-36 | Disaster                      | 1 | 1 | 1 | 2: 1270 | 2: 1273 |
| Kahramanmaraş'ta<br>Meydana Gelen<br>Deprem Hk. Basın<br>Bülteni-36 | Disaster                      | 1 | 1 | 1 | 2: 1270 | 2: 1273 |



|                                                                     |                                 |   |   |   |         |         |
|---------------------------------------------------------------------|---------------------------------|---|---|---|---------|---------|
| Kahramanmaraş'ta<br>Meydana Gelen<br>Deprem Hk. Basın<br>Bülteni-36 | Disaster                        | 1 | 1 | 1 | 2: 1318 | 2: 1321 |
| Kahramanmaraş'ta<br>Meydana Gelen<br>Deprem Hk. Basın<br>Bülteni-36 | Disaster                        | 1 | 1 | 1 | 2: 1318 | 2: 1321 |
| Kahramanmaraş'ta<br>Meydana Gelen<br>Deprem Hk. Basın<br>Bülteni-36 | Recovery\Fund drive             | 1 | 1 | 1 | 2: 1406 | 2: 1424 |
| Kahramanmaraş'ta<br>Meydana Gelen<br>Deprem Hk. Basın<br>Bülteni-36 | Recovery\Fund drive             | 1 | 1 | 1 | 2: 1406 | 2: 1424 |
| Kahramanmaraş'ta<br>Meydana Gelen<br>Deprem Hk. Basın<br>Bülteni-36 | Coordination\Social media       | 1 | 0 | 0 | 2: 1522 | 2: 1533 |
| Kahramanmaraş'ta<br>Meydana Gelen<br>Deprem Hk. Basın<br>Bülteni-36 | Coordination\Social media usage | 0 | 1 | 0 | 2: 1522 | 2: 1533 |
| Kahramanmaraş'ta<br>Meydana Gelen<br>Deprem Hk. Basın<br>Bülteni-36 | AFAD                            | 1 | 1 | 1 | 2: 1578 | 2: 1581 |
| Kahramanmaraş'ta<br>Meydana Gelen<br>Deprem Hk. Basın<br>Bülteni-36 | AFAD                            | 1 | 1 | 1 | 2: 1578 | 2: 1581 |
| Kahramanmaraş'ta<br>Meydana Gelen<br>Deprem Hk. Basın<br>Bülteni-36 | AFAD                            | 1 | 1 | 1 | 2: 1600 | 2: 1603 |
| Kahramanmaraş'ta<br>Meydana Gelen<br>Deprem Hk. Basın<br>Bülteni-36 | AFAD                            | 1 | 1 | 1 | 2: 1600 | 2: 1603 |
| Kahramanmaraş'ta<br>Meydana Gelen<br>Deprem Hk. Basın<br>Bülteni-36 | Coordination\Information        | 1 | 1 | 1 | 2: 1645 | 2: 1656 |
| Kahramanmaraş'ta<br>Meydana Gelen<br>Deprem Hk. Basın<br>Bülteni-36 | Coordination\Information        | 1 | 1 | 1 | 2: 1645 | 2: 1656 |
| Kahramanmaraş'ta<br>Meydana Gelen<br>Deprem Hk. Basın<br>Bülteni-36 | Recovery\Peacemaking            | 1 | 1 | 1 | 2: 1661 | 2: 1670 |
| Kahramanmaraş'ta<br>Meydana Gelen<br>Deprem Hk. Basın<br>Bülteni-36 | Recovery\Peacemaking            | 1 | 1 | 1 | 2: 1661 | 2: 1670 |
| Kahramanmaraş'ta<br>Meydana Gelen<br>Deprem Hk. Basın<br>Bülteni-36 | Kahramanmaraş                   | 1 | 0 | 0 | 3: 17   | 3: 29   |
| Kahramanmaraş'ta<br>Meydana Gelen<br>Deprem Hk. Basın<br>Bülteni-36 | Pazarcık                        | 0 | 1 | 0 | 3: 17   | 3: 29   |
| Kahramanmaraş'ta<br>Meydana Gelen<br>Deprem Hk. Basın<br>Bülteni-36 | Earthquake                      | 1 | 1 | 1 | 3: 48   | 3: 53   |
| Kahramanmaraş'ta<br>Meydana Gelen<br>Deprem Hk. Basın<br>Bülteni-36 | Earthquake                      | 1 | 1 | 1 | 3: 48   | 3: 53   |
| Kahramanmaraş'ta<br>Meydana Gelen<br>Deprem Hk. Basın<br>Bülteni-36 | AFAD                            | 1 | 1 | 1 | 3: 92   | 3: 95   |
| Kahramanmaraş'ta<br>Meydana Gelen<br>Deprem Hk. Basın<br>Bülteni-36 | AFAD                            | 1 | 1 | 1 | 3: 92   | 3: 95   |

|                                                                     |                                 |   |   |   |        |        |
|---------------------------------------------------------------------|---------------------------------|---|---|---|--------|--------|
| Kahramanmaraş'ta<br>Meydana Gelen<br>Deprem Hk. Basın<br>Bülteni-36 | Earthquake                      | 1 | 1 | 1 | 3: 134 | 3: 139 |
| Kahramanmaraş'ta<br>Meydana Gelen<br>Deprem Hk. Basın<br>Bülteni-36 | Earthquake                      | 1 | 1 | 1 | 3: 134 | 3: 139 |
| Kahramanmaraş'ta<br>Meydana Gelen<br>Deprem Hk. Basın<br>Bülteni-36 | Coordination\Social media       | 1 | 0 | 0 | 3: 155 | 3: 166 |
| Kahramanmaraş'ta<br>Meydana Gelen<br>Deprem Hk. Basın<br>Bülteni-36 | Coordination\Social media usage | 0 | 1 | 0 | 3: 155 | 3: 166 |
| Kahramanmaraş'ta<br>Meydana Gelen<br>Deprem Hk. Basın<br>Bülteni-36 | Disaster                        | 1 | 1 | 1 | 3: 292 | 3: 295 |
| Kahramanmaraş'ta<br>Meydana Gelen<br>Deprem Hk. Basın<br>Bülteni-36 | Disaster                        | 1 | 1 | 1 | 3: 292 | 3: 295 |
| Kahramanmaraş'ta<br>Meydana Gelen<br>Deprem Hk. Basın<br>Bülteni-36 | Emergency                       | 1 | 1 | 1 | 3: 300 | 3: 309 |
| Kahramanmaraş'ta<br>Meydana Gelen<br>Deprem Hk. Basın<br>Bülteni-36 | Emergency                       | 1 | 1 | 1 | 3: 300 | 3: 309 |
| Kahramanmaraş'ta<br>Meydana Gelen<br>Deprem Hk. Basın<br>Bülteni-21 | Kahramanmaraş                   | 1 | 0 | 0 | 1: 17  | 1: 29  |
| Kahramanmaraş'ta<br>Meydana Gelen<br>Deprem Hk. Basın<br>Bülteni-21 | Pazarcık                        | 0 | 1 | 0 | 1: 17  | 1: 29  |
| Kahramanmaraş'ta<br>Meydana Gelen<br>Deprem Hk. Basın<br>Bülteni-21 | Earthquake                      | 1 | 1 | 1 | 1: 48  | 1: 53  |
| Kahramanmaraş'ta<br>Meydana Gelen<br>Deprem Hk. Basın<br>Bülteni-21 | Earthquake                      | 1 | 1 | 1 | 1: 48  | 1: 53  |
| Kahramanmaraş'ta<br>Meydana Gelen<br>Deprem Hk. Basın<br>Bülteni-21 | AFAD                            | 1 | 1 | 1 | 1: 91  | 1: 94  |
| Kahramanmaraş'ta<br>Meydana Gelen<br>Deprem Hk. Basın<br>Bülteni-21 | AFAD                            | 1 | 1 | 1 | 1: 91  | 1: 94  |
| Kahramanmaraş'ta<br>Meydana Gelen<br>Deprem Hk. Basın<br>Bülteni-21 | Earthquake                      | 1 | 1 | 1 | 1: 133 | 1: 138 |
| Kahramanmaraş'ta<br>Meydana Gelen<br>Deprem Hk. Basın<br>Bülteni-21 | Earthquake                      | 1 | 1 | 1 | 1: 133 | 1: 138 |
| Kahramanmaraş'ta<br>Meydana Gelen<br>Deprem Hk. Basın<br>Bülteni-21 | Kahramanmaraş                   | 1 | 0 | 0 | 1: 166 | 1: 178 |

|                                                                    |               |   |   |   |        |        |
|--------------------------------------------------------------------|---------------|---|---|---|--------|--------|
| Kahramanmaraş'ta<br>Meydana Gelen<br>Deprem Hk.Basın<br>Bülteni-21 | Pazarcık      | 0 | 1 | 0 | 1: 166 | 1: 178 |
| Kahramanmaraş'ta<br>Meydana Gelen<br>Deprem Hk.Basın<br>Bülteni-21 | Earthquake    | 1 | 1 | 1 | 1: 197 | 1: 202 |
| Kahramanmaraş'ta<br>Meydana Gelen<br>Deprem Hk.Basın<br>Bülteni-21 | Earthquake    | 1 | 1 | 1 | 1: 197 | 1: 202 |
| Kahramanmaraş'ta<br>Meydana Gelen<br>Deprem Hk.Basın<br>Bülteni-21 | Kahramanmaraş | 1 | 0 | 0 | 1: 278 | 1: 290 |
| Kahramanmaraş'ta<br>Meydana Gelen<br>Deprem Hk.Basın<br>Bülteni-21 | Pazarcık      | 0 | 1 | 0 | 1: 278 | 1: 290 |
| Kahramanmaraş'ta<br>Meydana Gelen<br>Deprem Hk.Basın<br>Bülteni-21 | Earthquake    | 1 | 1 | 1 | 1: 309 | 1: 314 |
| Kahramanmaraş'ta<br>Meydana Gelen<br>Deprem Hk.Basın<br>Bülteni-21 | Earthquake    | 1 | 1 | 1 | 1: 309 | 1: 314 |
| Kahramanmaraş'ta<br>Meydana Gelen<br>Deprem Hk.Basın<br>Bülteni-21 | Kahramanmaraş | 1 | 0 | 0 | 1: 375 | 1: 387 |
| Kahramanmaraş'ta<br>Meydana Gelen<br>Deprem Hk.Basın<br>Bülteni-21 | Pazarcık      | 0 | 1 | 0 | 1: 375 | 1: 387 |
| Kahramanmaraş'ta<br>Meydana Gelen<br>Deprem Hk.Basın<br>Bülteni-21 | Earthquake    | 1 | 1 | 1 | 1: 470 | 1: 475 |
| Kahramanmaraş'ta<br>Meydana Gelen<br>Deprem Hk.Basın<br>Bülteni-21 | Earthquake    | 1 | 1 | 1 | 1: 470 | 1: 475 |
| Kahramanmaraş'ta<br>Meydana Gelen<br>Deprem Hk.Basın<br>Bülteni-21 | Earthquake    | 1 | 1 | 1 | 1: 497 | 1: 502 |
| Kahramanmaraş'ta<br>Meydana Gelen<br>Deprem Hk.Basın<br>Bülteni-21 | Earthquake    | 1 | 1 | 1 | 1: 497 | 1: 502 |
| Kahramanmaraş'ta<br>Meydana Gelen<br>Deprem Hk.Basın<br>Bülteni-21 | Earthquake    | 1 | 1 | 1 | 1: 530 | 1: 535 |
| Kahramanmaraş'ta<br>Meydana Gelen<br>Deprem Hk.Basın<br>Bülteni-21 | Earthquake    | 1 | 1 | 1 | 1: 530 | 1: 535 |
| Kahramanmaraş'ta<br>Meydana Gelen<br>Deprem Hk.Basın<br>Bülteni-21 | Kahramanmaraş | 1 | 0 | 0 | 1: 593 | 1: 605 |

|                                                              |                           |   |   |   |         |         |
|--------------------------------------------------------------|---------------------------|---|---|---|---------|---------|
| Kahramanmaraş'ta Meydana Gelen Depremler Hk.Basin Bülteni-21 | Pazarcık                  | 0 | 1 | 0 | 1: 593  | 1: 605  |
| Kahramanmaraş'ta Meydana Gelen Depremler Hk.Basin Bülteni-21 | Disaster                  | 1 | 1 | 1 | 1: 801  | 1: 804  |
| Kahramanmaraş'ta Meydana Gelen Depremler Hk.Basin Bülteni-21 | Disaster                  | 1 | 1 | 1 | 1: 801  | 1: 804  |
| Kahramanmaraş'ta Meydana Gelen Depremler Hk.Basin Bülteni-21 | Shelter&meal\Evacuation   | 1 | 1 | 1 | 1: 833  | 1: 839  |
| Kahramanmaraş'ta Meydana Gelen Depremler Hk.Basin Bülteni-21 | Shelter&meal\Evacuation   | 1 | 1 | 1 | 1: 833  | 1: 839  |
| Kahramanmaraş'ta Meydana Gelen Depremler Hk.Basin Bülteni-21 | AFAD                      | 1 | 1 | 1 | 1: 863  | 1: 866  |
| Kahramanmaraş'ta Meydana Gelen Depremler Hk.Basin Bülteni-21 | AFAD                      | 1 | 1 | 1 | 1: 863  | 1: 866  |
| Kahramanmaraş'ta Meydana Gelen Depremler Hk.Basin Bülteni-21 | Response\Coast guard&Navy | 1 | 1 | 1 | 1: 892  | 1: 905  |
| Kahramanmaraş'ta Meydana Gelen Depremler Hk.Basin Bülteni-21 | Response\Coast guard&Navy | 1 | 1 | 1 | 1: 892  | 1: 905  |
| Kahramanmaraş'ta Meydana Gelen Depremler Hk.Basin Bülteni-21 | Response\Number of staff  | 1 | 0 | 0 | 1: 969  | 1: 991  |
| Kahramanmaraş'ta Meydana Gelen Depremler Hk.Basin Bülteni-21 | Response\Search&Rescue    | 1 | 1 | 1 | 1: 969  | 1: 982  |
| Kahramanmaraş'ta Meydana Gelen Depremler Hk.Basin Bülteni-21 | Response\Search&Rescue    | 1 | 1 | 1 | 1: 969  | 1: 982  |
| Kahramanmaraş'ta Meydana Gelen Depremler Hk.Basin Bülteni-21 | Response\Number           | 0 | 1 | 0 | 1: 969  | 1: 991  |
| Kahramanmaraş'ta Meydana Gelen Depremler Hk.Basin Bülteni-21 | Response\Number of staff  | 1 | 0 | 0 | 1: 1020 | 1: 1042 |
| Kahramanmaraş'ta Meydana Gelen Depremler Hk.Basin Bülteni-21 | Response\Search&Rescue    | 1 | 1 | 1 | 1: 1020 | 1: 1033 |
| Kahramanmaraş'ta Meydana Gelen Depremler Hk.Basin Bülteni-21 | Response\Search&Rescue    | 1 | 1 | 1 | 1: 1020 | 1: 1033 |

|                                                           |                          |   |   |   |         |         |
|-----------------------------------------------------------|--------------------------|---|---|---|---------|---------|
| Kahramanmaraş'ta Meydana Gelen Deprem Hk.Basin Bülteni-21 | Response\Number          | 0 | 1 | 0 | 1: 1020 | 1: 1042 |
| Kahramanmaraş'ta Meydana Gelen Deprem Hk.Basin Bülteni-21 | Response\Number of staff | 1 | 0 | 0 | 1: 1143 | 1: 1165 |
| Kahramanmaraş'ta Meydana Gelen Deprem Hk.Basin Bülteni-21 | Response\Search&Rescue   | 1 | 1 | 1 | 1: 1143 | 1: 1156 |
| Kahramanmaraş'ta Meydana Gelen Deprem Hk.Basin Bülteni-21 | Response\Search&Rescue   | 1 | 1 | 1 | 1: 1143 | 1: 1156 |
| Kahramanmaraş'ta Meydana Gelen Deprem Hk.Basin Bülteni-21 | Response\Number          | 0 | 1 | 0 | 1: 1143 | 1: 1165 |
| Kahramanmaraş'ta Meydana Gelen Deprem Hk.Basin Bülteni-21 | AFAD                     | 1 | 1 | 1 | 1: 1194 | 1: 1197 |
| Kahramanmaraş'ta Meydana Gelen Deprem Hk.Basin Bülteni-21 | AFAD                     | 1 | 1 | 1 | 1: 1194 | 1: 1197 |
| Kahramanmaraş'ta Meydana Gelen Deprem Hk.Basin Bülteni-21 | Response\Military        | 1 | 1 | 1 | 1: 1209 | 1: 1216 |
| Kahramanmaraş'ta Meydana Gelen Deprem Hk.Basin Bülteni-21 | Response\Military        | 1 | 1 | 1 | 1: 1209 | 1: 1216 |
| Kahramanmaraş'ta Meydana Gelen Deprem Hk.Basin Bülteni-21 | Response\Number of staff | 1 | 0 | 0 | 1: 1328 | 1: 1342 |
| Kahramanmaraş'ta Meydana Gelen Deprem Hk.Basin Bülteni-21 | Response\Number          | 0 | 1 | 0 | 1: 1328 | 1: 1342 |
| Kahramanmaraş'ta Meydana Gelen Deprem Hk.Basin Bülteni-21 | Response\Number of staff | 1 | 0 | 0 | 1: 1384 | 1: 1398 |
| Kahramanmaraş'ta Meydana Gelen Deprem Hk.Basin Bülteni-21 | Response\Number          | 0 | 1 | 0 | 1: 1384 | 1: 1398 |
| Kahramanmaraş'ta Meydana Gelen Deprem Hk.Basin Bülteni-21 | Disaster                 | 1 | 1 | 1 | 1: 1414 | 1: 1417 |
| Kahramanmaraş'ta Meydana Gelen Deprem Hk.Basin Bülteni-21 | Disaster                 | 1 | 1 | 1 | 1: 1414 | 1: 1417 |
| Kahramanmaraş'ta Meydana Gelen Deprem Hk.Basin Bülteni-21 | Disaster                 | 1 | 1 | 1 | 1: 1579 | 1: 1582 |

|                                                           |                           |   |   |   |         |         |
|-----------------------------------------------------------|---------------------------|---|---|---|---------|---------|
| Kahramanmaraş'ta Meydana Gelen Deprem Hk.Basın Bülteni-21 | Disaster                  | 1 | 1 | 1 | 1: 1579 | 1: 1582 |
| Kahramanmaraş'ta Meydana Gelen Deprem Hk.Basın Bülteni-21 | AFAD                      | 1 | 1 | 1 | 1: 1633 | 1: 1636 |
| Kahramanmaraş'ta Meydana Gelen Deprem Hk.Basın Bülteni-21 | AFAD                      | 1 | 1 | 1 | 1: 1633 | 1: 1636 |
| Kahramanmaraş'ta Meydana Gelen Deprem Hk.Basın Bülteni-21 | Response\Coast guard&Navy | 1 | 1 | 1 | 1: 1726 | 1: 1739 |
| Kahramanmaraş'ta Meydana Gelen Deprem Hk.Basın Bülteni-21 | Response\Coast guard&Navy | 1 | 1 | 1 | 1: 1726 | 1: 1739 |
| Kahramanmaraş'ta Meydana Gelen Deprem Hk.Basın Bülteni-21 | Response\Military         | 1 | 1 | 1 | 1: 1744 | 1: 1751 |
| Kahramanmaraş'ta Meydana Gelen Deprem Hk.Basın Bülteni-21 | Response\Military         | 1 | 1 | 1 | 1: 1744 | 1: 1751 |
| Kahramanmaraş'ta Meydana Gelen Deprem Hk.Basın Bülteni-21 | Shelter&meal\Evacuation   | 1 | 1 | 1 | 1: 1950 | 1: 1956 |
| Kahramanmaraş'ta Meydana Gelen Deprem Hk.Basın Bülteni-21 | Shelter&meal\Evacuation   | 1 | 1 | 1 | 1: 1950 | 1: 1956 |
| Kahramanmaraş'ta Meydana Gelen Deprem Hk.Basın Bülteni-21 | Response\Coast guard&Navy | 1 | 1 | 1 | 1: 1967 | 1: 1982 |
| Kahramanmaraş'ta Meydana Gelen Deprem Hk.Basın Bülteni-21 | Response\Coast guard&Navy | 1 | 1 | 1 | 1: 1967 | 1: 1982 |
| Kahramanmaraş'ta Meydana Gelen Deprem Hk.Basın Bülteni-21 | Response\Coast guard&Navy | 1 | 1 | 1 | 1: 2011 | 1: 2024 |
| Kahramanmaraş'ta Meydana Gelen Deprem Hk.Basın Bülteni-21 | Response\Coast guard&Navy | 1 | 1 | 1 | 1: 2011 | 1: 2024 |
| Kahramanmaraş'ta Meydana Gelen Deprem Hk.Basın Bülteni-21 | Disaster                  | 1 | 1 | 1 | 1: 2101 | 1: 2104 |
| Kahramanmaraş'ta Meydana Gelen Deprem Hk.Basın Bülteni-21 | Disaster                  | 1 | 1 | 1 | 1: 2101 | 1: 2104 |
| Kahramanmaraş'ta Meydana Gelen Deprem Hk.Basın Bülteni-21 | Shelter&meal\Sheltering   | 1 | 1 | 1 | 1: 2106 | 1: 2112 |

|                                                           |                          |   |   |   |         |         |
|-----------------------------------------------------------|--------------------------|---|---|---|---------|---------|
| Kahramanmaraş'ta Meydana Gelen Deprem Hk.Basın Bülteni-21 | Shelter&meal\Sheltering  | 1 | 1 | 1 | 1: 2106 | 1: 2112 |
| Kahramanmaraş'ta Meydana Gelen Deprem Hk.Basın Bülteni-21 | Earthquake               | 1 | 1 | 1 | 1: 2121 | 1: 2126 |
| Kahramanmaraş'ta Meydana Gelen Deprem Hk.Basın Bülteni-21 | Earthquake               | 1 | 1 | 1 | 1: 2121 | 1: 2126 |
| Kahramanmaraş'ta Meydana Gelen Deprem Hk.Basın Bülteni-21 | AFAD                     | 1 | 1 | 1 | 1: 2167 | 1: 2170 |
| Kahramanmaraş'ta Meydana Gelen Deprem Hk.Basın Bülteni-21 | AFAD                     | 1 | 1 | 1 | 1: 2167 | 1: 2170 |
| Kahramanmaraş'ta Meydana Gelen Deprem Hk.Basın Bülteni-21 | Response\Welfare service | 1 | 1 | 1 | 1: 2181 | 1: 2193 |
| Kahramanmaraş'ta Meydana Gelen Deprem Hk.Basın Bülteni-21 | Response\Welfare service | 1 | 1 | 1 | 1: 2181 | 1: 2193 |
| Kahramanmaraş'ta Meydana Gelen Deprem Hk.Basın Bülteni-21 | Shelter&meal\Tent        | 1 | 1 | 1 | 1: 2239 | 1: 2243 |
| Kahramanmaraş'ta Meydana Gelen Deprem Hk.Basın Bülteni-21 | Shelter&meal\Tent        | 1 | 1 | 1 | 1: 2239 | 1: 2243 |
| Kahramanmaraş'ta Meydana Gelen Deprem Hk.Basın Bülteni-21 | Shelter&meal\Tent        | 1 | 1 | 1 | 1: 2304 | 1: 2308 |
| Kahramanmaraş'ta Meydana Gelen Deprem Hk.Basın Bülteni-21 | Shelter&meal\Tent        | 1 | 1 | 1 | 1: 2304 | 1: 2308 |
| Kahramanmaraş'ta Meydana Gelen Deprem Hk.Basın Bülteni-21 | Disaster                 | 1 | 1 | 1 | 1: 2340 | 1: 2343 |
| Kahramanmaraş'ta Meydana Gelen Deprem Hk.Basın Bülteni-21 | Disaster                 | 1 | 1 | 1 | 1: 2340 | 1: 2343 |
| Kahramanmaraş'ta Meydana Gelen Deprem Hk.Basın Bülteni-21 | AFAD                     | 1 | 1 | 1 | 1: 2370 | 1: 2373 |
| Kahramanmaraş'ta Meydana Gelen Deprem Hk.Basın Bülteni-21 | AFAD                     | 1 | 1 | 1 | 1: 2370 | 1: 2373 |
| Kahramanmaraş'ta Meydana Gelen Deprem Hk.Basın Bülteni-21 | Response\Military        | 1 | 1 | 1 | 1: 2381 | 1: 2388 |

|                                                              |                               |   |   |   |         |         |
|--------------------------------------------------------------|-------------------------------|---|---|---|---------|---------|
| Kahramanmaraş'ta Meydana Gelen Depremler Hk.Basin Bülteni-21 | Response\Military             | 1 | 1 | 1 | 1: 2381 | 1: 2388 |
| Kahramanmaraş'ta Meydana Gelen Depremler Hk.Basin Bülteni-21 | Coordination\NGO              | 1 | 1 | 1 | 1: 2393 | 1: 2404 |
| Kahramanmaraş'ta Meydana Gelen Depremler Hk.Basin Bülteni-21 | Coordination\NGO              | 1 | 1 | 1 | 1: 2393 | 1: 2404 |
| Kahramanmaraş'ta Meydana Gelen Depremler Hk.Basin Bülteni-21 | Shelter&meal\Mobile kitchen   | 1 | 1 | 1 | 1: 2484 | 1: 2495 |
| Kahramanmaraş'ta Meydana Gelen Depremler Hk.Basin Bülteni-21 | Shelter&meal\Mobile kitchen   | 1 | 1 | 1 | 1: 2484 | 1: 2495 |
| Kahramanmaraş'ta Meydana Gelen Depremler Hk.Basin Bülteni-21 | Shelter&meal\Mobile bakery    | 1 | 1 | 1 | 1: 2532 | 1: 2542 |
| Kahramanmaraş'ta Meydana Gelen Depremler Hk.Basin Bülteni-21 | Shelter&meal\Mobile bakery    | 1 | 1 | 1 | 1: 2532 | 1: 2542 |
| Kahramanmaraş'ta Meydana Gelen Depremler Hk.Basin Bülteni-21 | Shelter&meal\Container        | 1 | 1 | 1 | 1: 2564 | 1: 2572 |
| Kahramanmaraş'ta Meydana Gelen Depremler Hk.Basin Bülteni-21 | Shelter&meal\Container        | 1 | 1 | 1 | 1: 2564 | 1: 2572 |
| Kahramanmaraş'ta Meydana Gelen Depremler Hk.Basin Bülteni-21 | Disaster                      | 1 | 1 | 1 | 1: 2626 | 1: 2629 |
| Kahramanmaraş'ta Meydana Gelen Depremler Hk.Basin Bülteni-21 | Disaster                      | 1 | 1 | 1 | 1: 2626 | 1: 2629 |
| Kahramanmaraş'ta Meydana Gelen Depremler Hk.Basin Bülteni-21 | Shelter&meal\Hot meal         | 1 | 1 | 1 | 1: 2652 | 1: 2662 |
| Kahramanmaraş'ta Meydana Gelen Depremler Hk.Basin Bülteni-21 | Shelter&meal\Hot meal         | 1 | 1 | 1 | 1: 2652 | 1: 2662 |
| Kahramanmaraş'ta Meydana Gelen Depremler Hk.Basin Bülteni-21 | Disaster                      | 1 | 1 | 1 | 1: 2804 | 1: 2807 |
| Kahramanmaraş'ta Meydana Gelen Depremler Hk.Basin Bülteni-21 | Disaster                      | 1 | 1 | 1 | 1: 2804 | 1: 2807 |
| Kahramanmaraş'ta Meydana Gelen Depremler Hk.Basin Bülteni-21 | Response\Psychosocial support | 1 | 1 | 1 | 1: 2809 | 1: 2818 |



|                                                           |                               |   |   |   |         |         |
|-----------------------------------------------------------|-------------------------------|---|---|---|---------|---------|
| Kahramanmaraş'ta Meydana Gelen Deprem Hk.Basin Bülteni-21 | Response\Psychosocial support | 1 | 1 | 1 | 1: 2809 | 1: 2818 |
| Kahramanmaraş'ta Meydana Gelen Deprem Hk.Basin Bülteni-21 | Response\Welfare service      | 1 | 1 | 1 | 1: 2842 | 1: 2854 |
| Kahramanmaraş'ta Meydana Gelen Deprem Hk.Basin Bülteni-21 | Response\Welfare service      | 1 | 1 | 1 | 1: 2842 | 1: 2854 |
| Kahramanmaraş'ta Meydana Gelen Deprem Hk.Basin Bülteni-21 | Kahramanmaraş                 | 1 | 0 | 0 | 1: 2865 | 1: 2877 |
| Kahramanmaraş'ta Meydana Gelen Deprem Hk.Basin Bülteni-21 | Pazarcık                      | 0 | 1 | 0 | 1: 2865 | 1: 2877 |
| Kahramanmaraş'ta Meydana Gelen Deprem Hk.Basin Bülteni-21 | Kahramanmaraş                 | 1 | 0 | 0 | 2: 17   | 2: 29   |
| Kahramanmaraş'ta Meydana Gelen Deprem Hk.Basin Bülteni-21 | Pazarcık                      | 0 | 1 | 0 | 2: 17   | 2: 29   |
| Kahramanmaraş'ta Meydana Gelen Deprem Hk.Basin Bülteni-21 | Earthquake                    | 1 | 1 | 1 | 2: 48   | 2: 53   |
| Kahramanmaraş'ta Meydana Gelen Deprem Hk.Basin Bülteni-21 | Earthquake                    | 1 | 1 | 1 | 2: 48   | 2: 53   |
| Kahramanmaraş'ta Meydana Gelen Deprem Hk.Basin Bülteni-21 | AFAD                          | 1 | 1 | 1 | 2: 91   | 2: 94   |
| Kahramanmaraş'ta Meydana Gelen Deprem Hk.Basin Bülteni-21 | AFAD                          | 1 | 1 | 1 | 2: 91   | 2: 94   |
| Kahramanmaraş'ta Meydana Gelen Deprem Hk.Basin Bülteni-21 | Earthquake                    | 1 | 1 | 1 | 2: 133  | 2: 138  |
| Kahramanmaraş'ta Meydana Gelen Deprem Hk.Basin Bülteni-21 | Earthquake                    | 1 | 1 | 1 | 2: 133  | 2: 138  |
| Kahramanmaraş'ta Meydana Gelen Deprem Hk.Basin Bülteni-21 | Disaster                      | 1 | 1 | 1 | 2: 290  | 2: 293  |
| Kahramanmaraş'ta Meydana Gelen Deprem Hk.Basin Bülteni-21 | Disaster                      | 1 | 1 | 1 | 2: 290  | 2: 293  |
| Kahramanmaraş'ta Meydana Gelen Deprem Hk.Basin Bülteni-21 | Coordination\Public relations | 1 | 1 | 1 | 2: 449  | 2: 454  |

|                                                                    |                               |   |   |   |        |        |
|--------------------------------------------------------------------|-------------------------------|---|---|---|--------|--------|
| Kahramanmaraş'ta<br>Meydana Gelen<br>Deprem Hk.Basın<br>Bülteni-21 | Coordination\Public relations | 1 | 1 | 1 | 2: 449 | 2: 454 |
| Kahramanmaraş'ta<br>Meydana Gelen<br>Deprem Hk.Basın<br>Bülteni-21 | AFAD                          | 1 | 1 | 1 | 2: 489 | 2: 492 |
| Kahramanmaraş'ta<br>Meydana Gelen<br>Deprem Hk.Basın<br>Bülteni-21 | AFAD                          | 1 | 1 | 1 | 2: 489 | 2: 492 |
| Kahramanmaraş'ta<br>Meydana Gelen<br>Deprem Hk.Basın<br>Bülteni-21 | AFAD                          | 1 | 1 | 1 | 2: 547 | 2: 550 |
| Kahramanmaraş'ta<br>Meydana Gelen<br>Deprem Hk.Basın<br>Bülteni-21 | AFAD                          | 1 | 1 | 1 | 2: 547 | 2: 550 |
| Kahramanmaraş'ta<br>Meydana Gelen<br>Deprem Hk.Basın<br>Bülteni-21 | AFAD                          | 1 | 1 | 1 | 2: 664 | 2: 667 |
| Kahramanmaraş'ta<br>Meydana Gelen<br>Deprem Hk.Basın<br>Bülteni-21 | AFAD                          | 1 | 1 | 1 | 2: 664 | 2: 667 |
| Kahramanmaraş'ta<br>Meydana Gelen<br>Deprem Hk.Basın<br>Bülteni-21 | Response\Search&Rescue        | 1 | 1 | 1 | 2: 758 | 2: 771 |
| Kahramanmaraş'ta<br>Meydana Gelen<br>Deprem Hk.Basın<br>Bülteni-21 | Response\Search&Rescue        | 1 | 1 | 1 | 2: 758 | 2: 771 |
| Kahramanmaraş'ta<br>Meydana Gelen<br>Deprem Hk.Basın<br>Bülteni-21 | Disaster                      | 1 | 1 | 1 | 2: 822 | 2: 825 |
| Kahramanmaraş'ta<br>Meydana Gelen<br>Deprem Hk.Basın<br>Bülteni-21 | Disaster                      | 1 | 1 | 1 | 2: 822 | 2: 825 |
| Kahramanmaraş'ta<br>Meydana Gelen<br>Deprem Hk.Basın<br>Bülteni-21 | AFAD                          | 1 | 1 | 1 | 2: 840 | 2: 843 |
| Kahramanmaraş'ta<br>Meydana Gelen<br>Deprem Hk.Basın<br>Bülteni-21 | AFAD                          | 1 | 1 | 1 | 2: 840 | 2: 843 |
| Kahramanmaraş'ta<br>Meydana Gelen<br>Deprem Hk.Basın<br>Bülteni-21 | Preparedness\Preparedness     | 1 | 1 | 1 | 2: 904 | 2: 914 |
| Kahramanmaraş'ta<br>Meydana Gelen<br>Deprem Hk.Basın<br>Bülteni-21 | Preparedness\Preparedness     | 1 | 1 | 1 | 2: 904 | 2: 914 |
| Kahramanmaraş'ta<br>Meydana Gelen<br>Deprem Hk.Basın<br>Bülteni-21 | Disaster                      | 1 | 1 | 1 | 2: 904 | 2: 907 |

|                                                                    |                                 |   |   |   |         |         |
|--------------------------------------------------------------------|---------------------------------|---|---|---|---------|---------|
| Kahramanmaraş'ta<br>Meydana Gelen<br>Deprem Hk.Basın<br>Bülteni-21 | Disaster                        | 1 | 1 | 1 | 2: 904  | 2: 907  |
| Kahramanmaraş'ta<br>Meydana Gelen<br>Deprem Hk.Basın<br>Bülteni-21 | Disaster                        | 1 | 1 | 1 | 2: 952  | 2: 955  |
| Kahramanmaraş'ta<br>Meydana Gelen<br>Deprem Hk.Basın<br>Bülteni-21 | Disaster                        | 1 | 1 | 1 | 2: 952  | 2: 955  |
| Kahramanmaraş'ta<br>Meydana Gelen<br>Deprem Hk.Basın<br>Bülteni-21 | Recovery\Fund drive             | 1 | 1 | 1 | 2: 1013 | 2: 1031 |
| Kahramanmaraş'ta<br>Meydana Gelen<br>Deprem Hk.Basın<br>Bülteni-21 | Recovery\Fund drive             | 1 | 1 | 1 | 2: 1013 | 2: 1031 |
| Kahramanmaraş'ta<br>Meydana Gelen<br>Deprem Hk.Basın<br>Bülteni-21 | Coordination\Social media       | 1 | 0 | 0 | 2: 1129 | 2: 1140 |
| Kahramanmaraş'ta<br>Meydana Gelen<br>Deprem Hk.Basın<br>Bülteni-21 | Coordination\Social media usage | 0 | 1 | 0 | 2: 1129 | 2: 1140 |
| Kahramanmaraş'ta<br>Meydana Gelen<br>Deprem Hk.Basın<br>Bülteni-21 | AFAD                            | 1 | 1 | 1 | 2: 1185 | 2: 1188 |
| Kahramanmaraş'ta<br>Meydana Gelen<br>Deprem Hk.Basın<br>Bülteni-21 | AFAD                            | 1 | 1 | 1 | 2: 1185 | 2: 1188 |
| Kahramanmaraş'ta<br>Meydana Gelen<br>Deprem Hk.Basın<br>Bülteni-21 | AFAD                            | 1 | 1 | 1 | 2: 1207 | 2: 1210 |
| Kahramanmaraş'ta<br>Meydana Gelen<br>Deprem Hk.Basın<br>Bülteni-21 | AFAD                            | 1 | 1 | 1 | 2: 1207 | 2: 1210 |
| Kahramanmaraş'ta<br>Meydana Gelen<br>Deprem Hk.Basın<br>Bülteni-21 | Coordination\Information        | 1 | 1 | 1 | 2: 1252 | 2: 1263 |
| Kahramanmaraş'ta<br>Meydana Gelen<br>Deprem Hk.Basın<br>Bülteni-21 | Coordination\Information        | 1 | 1 | 1 | 2: 1252 | 2: 1263 |
| Kahramanmaraş'ta<br>Meydana Gelen<br>Deprem Hk.Basın<br>Bülteni-21 | Recovery\Peacemaking            | 1 | 1 | 1 | 2: 1268 | 2: 1277 |
| Kahramanmaraş'ta<br>Meydana Gelen<br>Deprem Hk.Basın<br>Bülteni-21 | Recovery\Peacemaking            | 1 | 1 | 1 | 2: 1268 | 2: 1277 |
| Kahramanmaraş'ta<br>Meydana Gelen<br>Deprem Hk.Basın<br>Bülteni-21 | Coordination\Social media       | 1 | 0 | 0 | 2: 1324 | 2: 1335 |

|                                                           |                                 |   |   |   |         |         |
|-----------------------------------------------------------|---------------------------------|---|---|---|---------|---------|
| Kahramanmaraş'ta Meydana Gelen Deprem Hk.Basın Bülteni-21 | Coordination\Social media usage | 0 | 1 | 0 | 2: 1324 | 2: 1335 |
| Kahramanmaraş'ta Meydana Gelen Deprem Hk.Basın Bülteni-21 | Disaster                        | 1 | 1 | 1 | 2: 1426 | 2: 1429 |
| Kahramanmaraş'ta Meydana Gelen Deprem Hk.Basın Bülteni-21 | Disaster                        | 1 | 1 | 1 | 2: 1426 | 2: 1429 |
| Kahramanmaraş'ta Meydana Gelen Deprem Hk.Basın Bülteni-21 | Emergency                       | 1 | 1 | 1 | 2: 1434 | 2: 1443 |
| Kahramanmaraş'ta Meydana Gelen Deprem Hk.Basın Bülteni-21 | Emergency                       | 1 | 1 | 1 | 2: 1434 | 2: 1443 |
| Kahramanmaraş'ta Meydana Gelen Deprem Hk.Basın Bülteni-22 | Kahramanmaraş                   | 1 | 0 | 0 | 1: 17   | 1: 29   |
| Kahramanmaraş'ta Meydana Gelen Deprem Hk.Basın Bülteni-22 | Pazarcık                        | 0 | 1 | 0 | 1: 17   | 1: 29   |
| Kahramanmaraş'ta Meydana Gelen Deprem Hk.Basın Bülteni-22 | Earthquake                      | 1 | 1 | 1 | 1: 48   | 1: 53   |
| Kahramanmaraş'ta Meydana Gelen Deprem Hk.Basın Bülteni-22 | Earthquake                      | 1 | 1 | 1 | 1: 48   | 1: 53   |
| Kahramanmaraş'ta Meydana Gelen Deprem Hk.Basın Bülteni-22 | AFAD                            | 1 | 1 | 1 | 1: 91   | 1: 94   |
| Kahramanmaraş'ta Meydana Gelen Deprem Hk.Basın Bülteni-22 | AFAD                            | 1 | 1 | 1 | 1: 91   | 1: 94   |
| Kahramanmaraş'ta Meydana Gelen Deprem Hk.Basın Bülteni-22 | Earthquake                      | 1 | 1 | 1 | 1: 133  | 1: 138  |
| Kahramanmaraş'ta Meydana Gelen Deprem Hk.Basın Bülteni-22 | Earthquake                      | 1 | 1 | 1 | 1: 133  | 1: 138  |
| Kahramanmaraş'ta Meydana Gelen Deprem Hk.Basın Bülteni-22 | Kahramanmaraş                   | 1 | 0 | 0 | 1: 166  | 1: 178  |
| Kahramanmaraş'ta Meydana Gelen Deprem Hk.Basın Bülteni-22 | Pazarcık                        | 0 | 1 | 0 | 1: 166  | 1: 178  |
| Kahramanmaraş'ta Meydana Gelen Deprem Hk.Basın Bülteni-22 | Earthquake                      | 1 | 1 | 1 | 1: 197  | 1: 202  |

|                                                                       |               |   |   |   |        |        |
|-----------------------------------------------------------------------|---------------|---|---|---|--------|--------|
| Kahramanmaraş'ta<br>Meydana Gelen<br>Depremler Hk.Basin<br>Bülteni-22 | Earthquake    | 1 | 1 | 1 | 1: 197 | 1: 202 |
| Kahramanmaraş'ta<br>Meydana Gelen<br>Depremler Hk.Basin<br>Bülteni-22 | Kahramanmaraş | 1 | 0 | 0 | 1: 278 | 1: 290 |
| Kahramanmaraş'ta<br>Meydana Gelen<br>Depremler Hk.Basin<br>Bülteni-22 | Pazarcık      | 0 | 1 | 0 | 1: 278 | 1: 290 |
| Kahramanmaraş'ta<br>Meydana Gelen<br>Depremler Hk.Basin<br>Bülteni-22 | Earthquake    | 1 | 1 | 1 | 1: 309 | 1: 314 |
| Kahramanmaraş'ta<br>Meydana Gelen<br>Depremler Hk.Basin<br>Bülteni-22 | Earthquake    | 1 | 1 | 1 | 1: 309 | 1: 314 |
| Kahramanmaraş'ta<br>Meydana Gelen<br>Depremler Hk.Basin<br>Bülteni-22 | Kahramanmaraş | 1 | 0 | 0 | 1: 375 | 1: 387 |
| Kahramanmaraş'ta<br>Meydana Gelen<br>Depremler Hk.Basin<br>Bülteni-22 | Pazarcık      | 0 | 1 | 0 | 1: 375 | 1: 387 |
| Kahramanmaraş'ta<br>Meydana Gelen<br>Depremler Hk.Basin<br>Bülteni-22 | Earthquake    | 1 | 1 | 1 | 1: 470 | 1: 475 |
| Kahramanmaraş'ta<br>Meydana Gelen<br>Depremler Hk.Basin<br>Bülteni-22 | Earthquake    | 1 | 1 | 1 | 1: 470 | 1: 475 |
| Kahramanmaraş'ta<br>Meydana Gelen<br>Depremler Hk.Basin<br>Bülteni-22 | Earthquake    | 1 | 1 | 1 | 1: 497 | 1: 502 |
| Kahramanmaraş'ta<br>Meydana Gelen<br>Depremler Hk.Basin<br>Bülteni-22 | Earthquake    | 1 | 1 | 1 | 1: 497 | 1: 502 |
| Kahramanmaraş'ta<br>Meydana Gelen<br>Depremler Hk.Basin<br>Bülteni-22 | Earthquake    | 1 | 1 | 1 | 1: 530 | 1: 535 |
| Kahramanmaraş'ta<br>Meydana Gelen<br>Depremler Hk.Basin<br>Bülteni-22 | Earthquake    | 1 | 1 | 1 | 1: 530 | 1: 535 |
| Kahramanmaraş'ta<br>Meydana Gelen<br>Depremler Hk.Basin<br>Bülteni-22 | Kahramanmaraş | 1 | 0 | 0 | 1: 593 | 1: 605 |
| Kahramanmaraş'ta<br>Meydana Gelen<br>Depremler Hk.Basin<br>Bülteni-22 | Pazarcık      | 0 | 1 | 0 | 1: 593 | 1: 605 |
| Kahramanmaraş'ta<br>Meydana Gelen<br>Depremler Hk.Basin<br>Bülteni-22 | Disaster      | 1 | 1 | 1 | 1: 801 | 1: 804 |

|                                                              |                           |   |   |   |         |         |
|--------------------------------------------------------------|---------------------------|---|---|---|---------|---------|
| Kahramanmaraş'ta Meydana Gelen Depremler Hk.Basin Bülteni-22 | Disaster                  | 1 | 1 | 1 | 1: 801  | 1: 804  |
| Kahramanmaraş'ta Meydana Gelen Depremler Hk.Basin Bülteni-22 | Shelter&meal\Evacuation   | 1 | 1 | 1 | 1: 833  | 1: 839  |
| Kahramanmaraş'ta Meydana Gelen Depremler Hk.Basin Bülteni-22 | Shelter&meal\Evacuation   | 1 | 1 | 1 | 1: 833  | 1: 839  |
| Kahramanmaraş'ta Meydana Gelen Depremler Hk.Basin Bülteni-22 | AFAD                      | 1 | 1 | 1 | 1: 863  | 1: 866  |
| Kahramanmaraş'ta Meydana Gelen Depremler Hk.Basin Bülteni-22 | AFAD                      | 1 | 1 | 1 | 1: 863  | 1: 866  |
| Kahramanmaraş'ta Meydana Gelen Depremler Hk.Basin Bülteni-22 | Response\Coast guard&Navy | 1 | 1 | 1 | 1: 892  | 1: 905  |
| Kahramanmaraş'ta Meydana Gelen Depremler Hk.Basin Bülteni-22 | Response\Coast guard&Navy | 1 | 1 | 1 | 1: 892  | 1: 905  |
| Kahramanmaraş'ta Meydana Gelen Depremler Hk.Basin Bülteni-22 | Response\Number of staff  | 1 | 0 | 0 | 1: 969  | 1: 991  |
| Kahramanmaraş'ta Meydana Gelen Depremler Hk.Basin Bülteni-22 | Response\Search&Rescue    | 1 | 1 | 1 | 1: 969  | 1: 982  |
| Kahramanmaraş'ta Meydana Gelen Depremler Hk.Basin Bülteni-22 | Response\Search&Rescue    | 1 | 1 | 1 | 1: 969  | 1: 982  |
| Kahramanmaraş'ta Meydana Gelen Depremler Hk.Basin Bülteni-22 | Response\Number           | 0 | 1 | 0 | 1: 969  | 1: 991  |
| Kahramanmaraş'ta Meydana Gelen Depremler Hk.Basin Bülteni-22 | Response\Number of staff  | 1 | 0 | 0 | 1: 1020 | 1: 1042 |
| Kahramanmaraş'ta Meydana Gelen Depremler Hk.Basin Bülteni-22 | Response\Search&Rescue    | 1 | 1 | 1 | 1: 1020 | 1: 1033 |
| Kahramanmaraş'ta Meydana Gelen Depremler Hk.Basin Bülteni-22 | Response\Search&Rescue    | 1 | 1 | 1 | 1: 1020 | 1: 1033 |
| Kahramanmaraş'ta Meydana Gelen Depremler Hk.Basin Bülteni-22 | Response\Number           | 0 | 1 | 0 | 1: 1020 | 1: 1042 |
| Kahramanmaraş'ta Meydana Gelen Depremler Hk.Basin Bülteni-22 | Response\Number of staff  | 1 | 0 | 0 | 1: 1143 | 1: 1165 |

|                                                              |                          |   |   |   |         |         |
|--------------------------------------------------------------|--------------------------|---|---|---|---------|---------|
| Kahramanmaraş'ta Meydana Gelen Depremler Hk.Basin Bülteni-22 | Response\Search&Rescue   | 1 | 1 | 1 | 1: 1143 | 1: 1156 |
| Kahramanmaraş'ta Meydana Gelen Depremler Hk.Basin Bülteni-22 | Response\Search&Rescue   | 1 | 1 | 1 | 1: 1143 | 1: 1156 |
| Kahramanmaraş'ta Meydana Gelen Depremler Hk.Basin Bülteni-22 | Response\Number          | 0 | 1 | 0 | 1: 1143 | 1: 1165 |
| Kahramanmaraş'ta Meydana Gelen Depremler Hk.Basin Bülteni-22 | AFAD                     | 1 | 1 | 1 | 1: 1194 | 1: 1197 |
| Kahramanmaraş'ta Meydana Gelen Depremler Hk.Basin Bülteni-22 | AFAD                     | 1 | 1 | 1 | 1: 1194 | 1: 1197 |
| Kahramanmaraş'ta Meydana Gelen Depremler Hk.Basin Bülteni-22 | Response\Military        | 1 | 1 | 1 | 1: 1209 | 1: 1216 |
| Kahramanmaraş'ta Meydana Gelen Depremler Hk.Basin Bülteni-22 | Response\Military        | 1 | 1 | 1 | 1: 1209 | 1: 1216 |
| Kahramanmaraş'ta Meydana Gelen Depremler Hk.Basin Bülteni-22 | Response\Number of staff | 1 | 0 | 0 | 1: 1328 | 1: 1342 |
| Kahramanmaraş'ta Meydana Gelen Depremler Hk.Basin Bülteni-22 | Response\Number          | 0 | 1 | 0 | 1: 1328 | 1: 1342 |
| Kahramanmaraş'ta Meydana Gelen Depremler Hk.Basin Bülteni-22 | Response\Number of staff | 1 | 0 | 0 | 1: 1384 | 1: 1398 |
| Kahramanmaraş'ta Meydana Gelen Depremler Hk.Basin Bülteni-22 | Response\Number          | 0 | 1 | 0 | 1: 1384 | 1: 1398 |
| Kahramanmaraş'ta Meydana Gelen Depremler Hk.Basin Bülteni-22 | Disaster                 | 1 | 1 | 1 | 1: 1414 | 1: 1417 |
| Kahramanmaraş'ta Meydana Gelen Depremler Hk.Basin Bülteni-22 | Disaster                 | 1 | 1 | 1 | 1: 1414 | 1: 1417 |
| Kahramanmaraş'ta Meydana Gelen Depremler Hk.Basin Bülteni-22 | Disaster                 | 1 | 1 | 1 | 1: 1579 | 1: 1582 |
| Kahramanmaraş'ta Meydana Gelen Depremler Hk.Basin Bülteni-22 | Disaster                 | 1 | 1 | 1 | 1: 1579 | 1: 1582 |
| Kahramanmaraş'ta Meydana Gelen Depremler Hk.Basin Bülteni-22 | AFAD                     | 1 | 1 | 1 | 1: 1633 | 1: 1636 |

|                                                           |                           |   |   |   |         |         |
|-----------------------------------------------------------|---------------------------|---|---|---|---------|---------|
| Kahramanmaraş'ta Meydana Gelen Deprem Hk.Basin Bülteni-22 | AFAD                      | 1 | 1 | 1 | 1: 1633 | 1: 1636 |
| Kahramanmaraş'ta Meydana Gelen Deprem Hk.Basin Bülteni-22 | Response\Coast guard&Navy | 1 | 1 | 1 | 1: 1726 | 1: 1739 |
| Kahramanmaraş'ta Meydana Gelen Deprem Hk.Basin Bülteni-22 | Response\Coast guard&Navy | 1 | 1 | 1 | 1: 1726 | 1: 1739 |
| Kahramanmaraş'ta Meydana Gelen Deprem Hk.Basin Bülteni-22 | Response\Military         | 1 | 1 | 1 | 1: 1744 | 1: 1751 |
| Kahramanmaraş'ta Meydana Gelen Deprem Hk.Basin Bülteni-22 | Response\Military         | 1 | 1 | 1 | 1: 1744 | 1: 1751 |
| Kahramanmaraş'ta Meydana Gelen Deprem Hk.Basin Bülteni-22 | Shelter&meal\Evacuation   | 1 | 1 | 1 | 1: 1950 | 1: 1956 |
| Kahramanmaraş'ta Meydana Gelen Deprem Hk.Basin Bülteni-22 | Shelter&meal\Evacuation   | 1 | 1 | 1 | 1: 1950 | 1: 1956 |
| Kahramanmaraş'ta Meydana Gelen Deprem Hk.Basin Bülteni-22 | Response\Coast guard&Navy | 1 | 1 | 1 | 1: 1967 | 1: 1982 |
| Kahramanmaraş'ta Meydana Gelen Deprem Hk.Basin Bülteni-22 | Response\Coast guard&Navy | 1 | 1 | 1 | 1: 1967 | 1: 1982 |
| Kahramanmaraş'ta Meydana Gelen Deprem Hk.Basin Bülteni-22 | Response\Coast guard&Navy | 1 | 1 | 1 | 1: 2011 | 1: 2024 |
| Kahramanmaraş'ta Meydana Gelen Deprem Hk.Basin Bülteni-22 | Response\Coast guard&Navy | 1 | 1 | 1 | 1: 2011 | 1: 2024 |
| Kahramanmaraş'ta Meydana Gelen Deprem Hk.Basin Bülteni-22 | Disaster                  | 1 | 1 | 1 | 1: 2101 | 1: 2104 |
| Kahramanmaraş'ta Meydana Gelen Deprem Hk.Basin Bülteni-22 | Disaster                  | 1 | 1 | 1 | 1: 2101 | 1: 2104 |
| Kahramanmaraş'ta Meydana Gelen Deprem Hk.Basin Bülteni-22 | Shelter&meal\Sheltering   | 1 | 1 | 1 | 1: 2106 | 1: 2112 |
| Kahramanmaraş'ta Meydana Gelen Deprem Hk.Basin Bülteni-22 | Shelter&meal\Sheltering   | 1 | 1 | 1 | 1: 2106 | 1: 2112 |
| Kahramanmaraş'ta Meydana Gelen Deprem Hk.Basin Bülteni-22 | Earthquake                | 1 | 1 | 1 | 1: 2121 | 1: 2126 |



|                                                                    |                          |   |   |   |         |         |
|--------------------------------------------------------------------|--------------------------|---|---|---|---------|---------|
| Kahramanmaraş'ta<br>Meydana Gelen<br>Deprem Hk.Basın<br>Bülteni-22 | Earthquake               | 1 | 1 | 1 | 1: 2121 | 1: 2126 |
| Kahramanmaraş'ta<br>Meydana Gelen<br>Deprem Hk.Basın<br>Bülteni-22 | AFAD                     | 1 | 1 | 1 | 1: 2167 | 1: 2170 |
| Kahramanmaraş'ta<br>Meydana Gelen<br>Deprem Hk.Basın<br>Bülteni-22 | AFAD                     | 1 | 1 | 1 | 1: 2167 | 1: 2170 |
| Kahramanmaraş'ta<br>Meydana Gelen<br>Deprem Hk.Basın<br>Bülteni-22 | Response\Welfare service | 1 | 1 | 1 | 1: 2181 | 1: 2193 |
| Kahramanmaraş'ta<br>Meydana Gelen<br>Deprem Hk.Basın<br>Bülteni-22 | Response\Welfare service | 1 | 1 | 1 | 1: 2181 | 1: 2193 |
| Kahramanmaraş'ta<br>Meydana Gelen<br>Deprem Hk.Basın<br>Bülteni-22 | Shelter&meal\Tent        | 1 | 1 | 1 | 1: 2267 | 1: 2271 |
| Kahramanmaraş'ta<br>Meydana Gelen<br>Deprem Hk.Basın<br>Bülteni-22 | Shelter&meal\Tent        | 1 | 1 | 1 | 1: 2267 | 1: 2271 |
| Kahramanmaraş'ta<br>Meydana Gelen<br>Deprem Hk.Basın<br>Bülteni-22 | Shelter&meal\Tent        | 1 | 1 | 1 | 1: 2331 | 1: 2335 |
| Kahramanmaraş'ta<br>Meydana Gelen<br>Deprem Hk.Basın<br>Bülteni-22 | Shelter&meal\Tent        | 1 | 1 | 1 | 1: 2331 | 1: 2335 |
| Kahramanmaraş'ta<br>Meydana Gelen<br>Deprem Hk.Basın<br>Bülteni-22 | Disaster                 | 1 | 1 | 1 | 1: 2367 | 1: 2370 |
| Kahramanmaraş'ta<br>Meydana Gelen<br>Deprem Hk.Basın<br>Bülteni-22 | Disaster                 | 1 | 1 | 1 | 1: 2367 | 1: 2370 |
| Kahramanmaraş'ta<br>Meydana Gelen<br>Deprem Hk.Basın<br>Bülteni-22 | AFAD                     | 1 | 1 | 1 | 1: 2397 | 1: 2400 |
| Kahramanmaraş'ta<br>Meydana Gelen<br>Deprem Hk.Basın<br>Bülteni-22 | AFAD                     | 1 | 1 | 1 | 1: 2397 | 1: 2400 |
| Kahramanmaraş'ta<br>Meydana Gelen<br>Deprem Hk.Basın<br>Bülteni-22 | Response\Military        | 1 | 1 | 1 | 1: 2408 | 1: 2415 |
| Kahramanmaraş'ta<br>Meydana Gelen<br>Deprem Hk.Basın<br>Bülteni-22 | Response\Military        | 1 | 1 | 1 | 1: 2408 | 1: 2415 |
| Kahramanmaraş'ta<br>Meydana Gelen<br>Deprem Hk.Basın<br>Bülteni-22 | Coordination\NGO         | 1 | 1 | 1 | 1: 2420 | 1: 2431 |

|                                                           |                               |   |   |   |         |         |
|-----------------------------------------------------------|-------------------------------|---|---|---|---------|---------|
| Kahramanmaraş'ta Meydana Gelen Deprem Hk.Basın Bülteni-22 | Coordination\NGO              | 1 | 1 | 1 | 1: 2420 | 1: 2431 |
| Kahramanmaraş'ta Meydana Gelen Deprem Hk.Basın Bülteni-22 | Shelter&meal\Mobile kitchen   | 1 | 1 | 1 | 1: 2512 | 1: 2523 |
| Kahramanmaraş'ta Meydana Gelen Deprem Hk.Basın Bülteni-22 | Shelter&meal\Mobile kitchen   | 1 | 1 | 1 | 1: 2512 | 1: 2523 |
| Kahramanmaraş'ta Meydana Gelen Deprem Hk.Basın Bülteni-22 | Shelter&meal\Mobile bakery    | 1 | 1 | 1 | 1: 2545 | 1: 2555 |
| Kahramanmaraş'ta Meydana Gelen Deprem Hk.Basın Bülteni-22 | Shelter&meal\Mobile bakery    | 1 | 1 | 1 | 1: 2545 | 1: 2555 |
| Kahramanmaraş'ta Meydana Gelen Deprem Hk.Basın Bülteni-22 | Disaster                      | 1 | 1 | 1 | 1: 2603 | 1: 2606 |
| Kahramanmaraş'ta Meydana Gelen Deprem Hk.Basın Bülteni-22 | Disaster                      | 1 | 1 | 1 | 1: 2603 | 1: 2606 |
| Kahramanmaraş'ta Meydana Gelen Deprem Hk.Basın Bülteni-22 | Shelter&meal\Hot meal         | 1 | 1 | 1 | 1: 2629 | 1: 2639 |
| Kahramanmaraş'ta Meydana Gelen Deprem Hk.Basın Bülteni-22 | Shelter&meal\Hot meal         | 1 | 1 | 1 | 1: 2629 | 1: 2639 |
| Kahramanmaraş'ta Meydana Gelen Deprem Hk.Basın Bülteni-22 | Disaster                      | 1 | 1 | 1 | 1: 2780 | 1: 2783 |
| Kahramanmaraş'ta Meydana Gelen Deprem Hk.Basın Bülteni-22 | Disaster                      | 1 | 1 | 1 | 1: 2780 | 1: 2783 |
| Kahramanmaraş'ta Meydana Gelen Deprem Hk.Basın Bülteni-22 | Response\Psychosocial support | 1 | 1 | 1 | 1: 2785 | 1: 2794 |
| Kahramanmaraş'ta Meydana Gelen Deprem Hk.Basın Bülteni-22 | Response\Psychosocial support | 1 | 1 | 1 | 1: 2785 | 1: 2794 |
| Kahramanmaraş'ta Meydana Gelen Deprem Hk.Basın Bülteni-22 | Response\Welfare service      | 1 | 1 | 1 | 1: 2818 | 1: 2830 |
| Kahramanmaraş'ta Meydana Gelen Deprem Hk.Basın Bülteni-22 | Response\Welfare service      | 1 | 1 | 1 | 1: 2818 | 1: 2830 |
| Kahramanmaraş'ta Meydana Gelen Deprem Hk.Basın Bülteni-22 | Kahramanmaraş                 | 1 | 0 | 0 | 1: 2841 | 1: 2853 |

|                                                              |                               |   |   |   |         |         |
|--------------------------------------------------------------|-------------------------------|---|---|---|---------|---------|
| Kahramanmaraş'ta Meydana Gelen Depremler Hk.Basın Bülteni-22 | Pazarcık                      | 0 | 1 | 0 | 1: 2841 | 1: 2853 |
| Kahramanmaraş'ta Meydana Gelen Depremler Hk.Basın Bülteni-22 | Earthquake                    | 1 | 1 | 1 | 1: 2966 | 1: 2971 |
| Kahramanmaraş'ta Meydana Gelen Depremler Hk.Basın Bülteni-22 | Earthquake                    | 1 | 1 | 1 | 1: 2966 | 1: 2971 |
| Kahramanmaraş'ta Meydana Gelen Depremler Hk.Basın Bülteni-22 | Earthquake                    | 1 | 1 | 1 | 1: 2992 | 1: 2997 |
| Kahramanmaraş'ta Meydana Gelen Depremler Hk.Basın Bülteni-22 | Earthquake                    | 1 | 1 | 1 | 1: 2992 | 1: 2997 |
| Kahramanmaraş'ta Meydana Gelen Depremler Hk.Basın Bülteni-22 | Response\Psychosocial support | 1 | 1 | 1 | 1: 3055 | 1: 3065 |
| Kahramanmaraş'ta Meydana Gelen Depremler Hk.Basın Bülteni-22 | Response\Psychosocial support | 1 | 1 | 1 | 1: 3055 | 1: 3065 |
| Kahramanmaraş'ta Meydana Gelen Depremler Hk.Basın Bülteni-22 | Kahramanmaraş                 | 1 | 0 | 0 | 2: 17   | 2: 29   |
| Kahramanmaraş'ta Meydana Gelen Depremler Hk.Basın Bülteni-22 | Pazarcık                      | 0 | 1 | 0 | 2: 17   | 2: 29   |
| Kahramanmaraş'ta Meydana Gelen Depremler Hk.Basın Bülteni-22 | Earthquake                    | 1 | 1 | 1 | 2: 48   | 2: 53   |
| Kahramanmaraş'ta Meydana Gelen Depremler Hk.Basın Bülteni-22 | Earthquake                    | 1 | 1 | 1 | 2: 48   | 2: 53   |
| Kahramanmaraş'ta Meydana Gelen Depremler Hk.Basın Bülteni-22 | AFAD                          | 1 | 1 | 1 | 2: 91   | 2: 94   |
| Kahramanmaraş'ta Meydana Gelen Depremler Hk.Basın Bülteni-22 | AFAD                          | 1 | 1 | 1 | 2: 91   | 2: 94   |
| Kahramanmaraş'ta Meydana Gelen Depremler Hk.Basın Bülteni-22 | Earthquake                    | 1 | 1 | 1 | 2: 133  | 2: 138  |
| Kahramanmaraş'ta Meydana Gelen Depremler Hk.Basın Bülteni-22 | Earthquake                    | 1 | 1 | 1 | 2: 133  | 2: 138  |
| Kahramanmaraş'ta Meydana Gelen Depremler Hk.Basın Bülteni-22 | Disaster                      | 1 | 1 | 1 | 2: 290  | 2: 293  |

|                                                                    |                               |   |   |   |        |        |
|--------------------------------------------------------------------|-------------------------------|---|---|---|--------|--------|
| Kahramanmaraş'ta<br>Meydana Gelen<br>Deprem Hk.Basın<br>Bülteni-22 | Disaster                      | 1 | 1 | 1 | 2: 290 | 2: 293 |
| Kahramanmaraş'ta<br>Meydana Gelen<br>Deprem Hk.Basın<br>Bülteni-22 | Coordination\Public relations | 1 | 1 | 1 | 2: 449 | 2: 454 |
| Kahramanmaraş'ta<br>Meydana Gelen<br>Deprem Hk.Basın<br>Bülteni-22 | Coordination\Public relations | 1 | 1 | 1 | 2: 449 | 2: 454 |
| Kahramanmaraş'ta<br>Meydana Gelen<br>Deprem Hk.Basın<br>Bülteni-22 | AFAD                          | 1 | 1 | 1 | 2: 489 | 2: 492 |
| Kahramanmaraş'ta<br>Meydana Gelen<br>Deprem Hk.Basın<br>Bülteni-22 | AFAD                          | 1 | 1 | 1 | 2: 489 | 2: 492 |
| Kahramanmaraş'ta<br>Meydana Gelen<br>Deprem Hk.Basın<br>Bülteni-22 | AFAD                          | 1 | 1 | 1 | 2: 547 | 2: 550 |
| Kahramanmaraş'ta<br>Meydana Gelen<br>Deprem Hk.Basın<br>Bülteni-22 | AFAD                          | 1 | 1 | 1 | 2: 547 | 2: 550 |
| Kahramanmaraş'ta<br>Meydana Gelen<br>Deprem Hk.Basın<br>Bülteni-22 | AFAD                          | 1 | 1 | 1 | 2: 664 | 2: 667 |
| Kahramanmaraş'ta<br>Meydana Gelen<br>Deprem Hk.Basın<br>Bülteni-22 | AFAD                          | 1 | 1 | 1 | 2: 664 | 2: 667 |
| Kahramanmaraş'ta<br>Meydana Gelen<br>Deprem Hk.Basın<br>Bülteni-22 | Response\Search&Rescue        | 1 | 1 | 1 | 2: 758 | 2: 771 |
| Kahramanmaraş'ta<br>Meydana Gelen<br>Deprem Hk.Basın<br>Bülteni-22 | Response\Search&Rescue        | 1 | 1 | 1 | 2: 758 | 2: 771 |
| Kahramanmaraş'ta<br>Meydana Gelen<br>Deprem Hk.Basın<br>Bülteni-22 | Disaster                      | 1 | 1 | 1 | 2: 822 | 2: 825 |
| Kahramanmaraş'ta<br>Meydana Gelen<br>Deprem Hk.Basın<br>Bülteni-22 | Disaster                      | 1 | 1 | 1 | 2: 822 | 2: 825 |
| Kahramanmaraş'ta<br>Meydana Gelen<br>Deprem Hk.Basın<br>Bülteni-22 | AFAD                          | 1 | 1 | 1 | 2: 840 | 2: 843 |
| Kahramanmaraş'ta<br>Meydana Gelen<br>Deprem Hk.Basın<br>Bülteni-22 | AFAD                          | 1 | 1 | 1 | 2: 840 | 2: 843 |
| Kahramanmaraş'ta<br>Meydana Gelen<br>Deprem Hk.Basın<br>Bülteni-22 | Preparedness\Preparedness     | 1 | 1 | 1 | 2: 904 | 2: 914 |

|                                                              |                                 |   |   |   |         |         |
|--------------------------------------------------------------|---------------------------------|---|---|---|---------|---------|
| Kahramanmaraş'ta Meydana Gelen Depremler Hk.Basın Bülteni-22 | Preparedness\Preparedness       | 1 | 1 | 1 | 2: 904  | 2: 914  |
| Kahramanmaraş'ta Meydana Gelen Depremler Hk.Basın Bülteni-22 | Disaster                        | 1 | 1 | 1 | 2: 904  | 2: 907  |
| Kahramanmaraş'ta Meydana Gelen Depremler Hk.Basın Bülteni-22 | Disaster                        | 1 | 1 | 1 | 2: 904  | 2: 907  |
| Kahramanmaraş'ta Meydana Gelen Depremler Hk.Basın Bülteni-22 | Disaster                        | 1 | 1 | 1 | 2: 952  | 2: 955  |
| Kahramanmaraş'ta Meydana Gelen Depremler Hk.Basın Bülteni-22 | Disaster                        | 1 | 1 | 1 | 2: 952  | 2: 955  |
| Kahramanmaraş'ta Meydana Gelen Depremler Hk.Basın Bülteni-22 | Recovery\Fund drive             | 1 | 1 | 1 | 2: 1013 | 2: 1031 |
| Kahramanmaraş'ta Meydana Gelen Depremler Hk.Basın Bülteni-22 | Recovery\Fund drive             | 1 | 1 | 1 | 2: 1013 | 2: 1031 |
| Kahramanmaraş'ta Meydana Gelen Depremler Hk.Basın Bülteni-22 | Coordination\Social media       | 1 | 0 | 0 | 2: 1129 | 2: 1140 |
| Kahramanmaraş'ta Meydana Gelen Depremler Hk.Basın Bülteni-22 | Coordination\Social media usage | 0 | 1 | 0 | 2: 1129 | 2: 1140 |
| Kahramanmaraş'ta Meydana Gelen Depremler Hk.Basın Bülteni-22 | AFAD                            | 1 | 1 | 1 | 2: 1185 | 2: 1188 |
| Kahramanmaraş'ta Meydana Gelen Depremler Hk.Basın Bülteni-22 | AFAD                            | 1 | 1 | 1 | 2: 1185 | 2: 1188 |
| Kahramanmaraş'ta Meydana Gelen Depremler Hk.Basın Bülteni-22 | AFAD                            | 1 | 1 | 1 | 2: 1207 | 2: 1210 |
| Kahramanmaraş'ta Meydana Gelen Depremler Hk.Basın Bülteni-22 | AFAD                            | 1 | 1 | 1 | 2: 1207 | 2: 1210 |
| Kahramanmaraş'ta Meydana Gelen Depremler Hk.Basın Bülteni-22 | Coordination\Information        | 1 | 1 | 1 | 2: 1252 | 2: 1263 |
| Kahramanmaraş'ta Meydana Gelen Depremler Hk.Basın Bülteni-22 | Coordination\Information        | 1 | 1 | 1 | 2: 1252 | 2: 1263 |
| Kahramanmaraş'ta Meydana Gelen Depremler Hk.Basın Bülteni-22 | Recovery\Peacemaking            | 1 | 1 | 1 | 2: 1268 | 2: 1277 |

|                                                           |                                 |   |   |   |         |         |
|-----------------------------------------------------------|---------------------------------|---|---|---|---------|---------|
| Kahramanmaraş'ta Meydana Gelen Deprem Hk.Basın Bülteni-22 | Recovery\Peacemaking            | 1 | 1 | 1 | 2: 1268 | 2: 1277 |
| Kahramanmaraş'ta Meydana Gelen Deprem Hk.Basın Bülteni-22 | Coordination\Social media       | 1 | 0 | 0 | 2: 1324 | 2: 1335 |
| Kahramanmaraş'ta Meydana Gelen Deprem Hk.Basın Bülteni-22 | Coordination\Social media usage | 0 | 1 | 0 | 2: 1324 | 2: 1335 |
| Kahramanmaraş'ta Meydana Gelen Deprem Hk.Basın Bülteni-22 | Kahramanmaraş                   | 1 | 0 | 0 | 3: 17   | 3: 29   |
| Kahramanmaraş'ta Meydana Gelen Deprem Hk.Basın Bülteni-22 | Pazarcık                        | 0 | 1 | 0 | 3: 17   | 3: 29   |
| Kahramanmaraş'ta Meydana Gelen Deprem Hk.Basın Bülteni-22 | Earthquake                      | 1 | 1 | 1 | 3: 48   | 3: 53   |
| Kahramanmaraş'ta Meydana Gelen Deprem Hk.Basın Bülteni-22 | Earthquake                      | 1 | 1 | 1 | 3: 48   | 3: 53   |
| Kahramanmaraş'ta Meydana Gelen Deprem Hk.Basın Bülteni-22 | AFAD                            | 1 | 1 | 1 | 3: 91   | 3: 94   |
| Kahramanmaraş'ta Meydana Gelen Deprem Hk.Basın Bülteni-22 | AFAD                            | 1 | 1 | 1 | 3: 91   | 3: 94   |
| Kahramanmaraş'ta Meydana Gelen Deprem Hk.Basın Bülteni-22 | Earthquake                      | 1 | 1 | 1 | 3: 133  | 3: 138  |
| Kahramanmaraş'ta Meydana Gelen Deprem Hk.Basın Bülteni-22 | Earthquake                      | 1 | 1 | 1 | 3: 133  | 3: 138  |
| Kahramanmaraş'ta Meydana Gelen Deprem Hk.Basın Bülteni-22 | Disaster                        | 1 | 1 | 1 | 3: 197  | 3: 200  |
| Kahramanmaraş'ta Meydana Gelen Deprem Hk.Basın Bülteni-22 | Disaster                        | 1 | 1 | 1 | 3: 197  | 3: 200  |
| Kahramanmaraş'ta Meydana Gelen Deprem Hk.Basın Bülteni-22 | Emergency                       | 1 | 1 | 1 | 3: 205  | 3: 214  |
| Kahramanmaraş'ta Meydana Gelen Deprem Hk.Basın Bülteni-22 | Emergency                       | 1 | 1 | 1 | 3: 205  | 3: 214  |
| Kahramanmaraş'ta Meydana Gelen Deprem Hk.Basın Bülteni-27 | Kahramanmaraş                   | 1 | 0 | 0 | 1: 17   | 1: 29   |

|                                                                    |               |   |   |   |        |        |
|--------------------------------------------------------------------|---------------|---|---|---|--------|--------|
| Kahramanmaraş'ta<br>Meydana Gelen<br>Deprem Hk.Basin<br>Bülteni-27 | Pazarcık      | 0 | 1 | 0 | 1: 17  | 1: 29  |
| Kahramanmaraş'ta<br>Meydana Gelen<br>Deprem Hk.Basin<br>Bülteni-27 | Earthquake    | 1 | 1 | 1 | 1: 48  | 1: 53  |
| Kahramanmaraş'ta<br>Meydana Gelen<br>Deprem Hk.Basin<br>Bülteni-27 | Earthquake    | 1 | 1 | 1 | 1: 48  | 1: 53  |
| Kahramanmaraş'ta<br>Meydana Gelen<br>Deprem Hk.Basin<br>Bülteni-27 | AFAD          | 1 | 1 | 1 | 1: 91  | 1: 94  |
| Kahramanmaraş'ta<br>Meydana Gelen<br>Deprem Hk.Basin<br>Bülteni-27 | AFAD          | 1 | 1 | 1 | 1: 91  | 1: 94  |
| Kahramanmaraş'ta<br>Meydana Gelen<br>Deprem Hk.Basin<br>Bülteni-27 | Earthquake    | 1 | 1 | 1 | 1: 133 | 1: 138 |
| Kahramanmaraş'ta<br>Meydana Gelen<br>Deprem Hk.Basin<br>Bülteni-27 | Earthquake    | 1 | 1 | 1 | 1: 133 | 1: 138 |
| Kahramanmaraş'ta<br>Meydana Gelen<br>Deprem Hk.Basin<br>Bülteni-27 | Kahramanmaraş | 1 | 0 | 0 | 1: 166 | 1: 178 |
| Kahramanmaraş'ta<br>Meydana Gelen<br>Deprem Hk.Basin<br>Bülteni-27 | Pazarcık      | 0 | 1 | 0 | 1: 166 | 1: 178 |
| Kahramanmaraş'ta<br>Meydana Gelen<br>Deprem Hk.Basin<br>Bülteni-27 | Earthquake    | 1 | 1 | 1 | 1: 197 | 1: 202 |
| Kahramanmaraş'ta<br>Meydana Gelen<br>Deprem Hk.Basin<br>Bülteni-27 | Earthquake    | 1 | 1 | 1 | 1: 197 | 1: 202 |
| Kahramanmaraş'ta<br>Meydana Gelen<br>Deprem Hk.Basin<br>Bülteni-27 | Kahramanmaraş | 1 | 0 | 0 | 1: 278 | 1: 290 |
| Kahramanmaraş'ta<br>Meydana Gelen<br>Deprem Hk.Basin<br>Bülteni-27 | Pazarcık      | 0 | 1 | 0 | 1: 278 | 1: 290 |
| Kahramanmaraş'ta<br>Meydana Gelen<br>Deprem Hk.Basin<br>Bülteni-27 | Earthquake    | 1 | 1 | 1 | 1: 309 | 1: 314 |
| Kahramanmaraş'ta<br>Meydana Gelen<br>Deprem Hk.Basin<br>Bülteni-27 | Earthquake    | 1 | 1 | 1 | 1: 309 | 1: 314 |
| Kahramanmaraş'ta<br>Meydana Gelen<br>Deprem Hk.Basin<br>Bülteni-27 | Kahramanmaraş | 1 | 0 | 0 | 1: 375 | 1: 387 |

|                                                              |                           |   |   |   |        |        |
|--------------------------------------------------------------|---------------------------|---|---|---|--------|--------|
| Kahramanmaraş'ta Meydana Gelen Depremler Hk.Basin Bülteni-27 | Pazarcık                  | 0 | 1 | 0 | 1: 375 | 1: 387 |
| Kahramanmaraş'ta Meydana Gelen Depremler Hk.Basin Bülteni-27 | Earthquake                | 1 | 1 | 1 | 1: 470 | 1: 475 |
| Kahramanmaraş'ta Meydana Gelen Depremler Hk.Basin Bülteni-27 | Earthquake                | 1 | 1 | 1 | 1: 470 | 1: 475 |
| Kahramanmaraş'ta Meydana Gelen Depremler Hk.Basin Bülteni-27 | Earthquake                | 1 | 1 | 1 | 1: 497 | 1: 502 |
| Kahramanmaraş'ta Meydana Gelen Depremler Hk.Basin Bülteni-27 | Earthquake                | 1 | 1 | 1 | 1: 497 | 1: 502 |
| Kahramanmaraş'ta Meydana Gelen Depremler Hk.Basin Bülteni-27 | Earthquake                | 1 | 1 | 1 | 1: 530 | 1: 535 |
| Kahramanmaraş'ta Meydana Gelen Depremler Hk.Basin Bülteni-27 | Earthquake                | 1 | 1 | 1 | 1: 530 | 1: 535 |
| Kahramanmaraş'ta Meydana Gelen Depremler Hk.Basin Bülteni-27 | Kahramanmaraş             | 1 | 0 | 0 | 1: 593 | 1: 605 |
| Kahramanmaraş'ta Meydana Gelen Depremler Hk.Basin Bülteni-27 | Pazarcık                  | 0 | 1 | 0 | 1: 593 | 1: 605 |
| Kahramanmaraş'ta Meydana Gelen Depremler Hk.Basin Bülteni-27 | Disaster                  | 1 | 1 | 1 | 1: 803 | 1: 806 |
| Kahramanmaraş'ta Meydana Gelen Depremler Hk.Basin Bülteni-27 | Disaster                  | 1 | 1 | 1 | 1: 803 | 1: 806 |
| Kahramanmaraş'ta Meydana Gelen Depremler Hk.Basin Bülteni-27 | Shelter&meal\Evacuation   | 1 | 1 | 1 | 1: 836 | 1: 842 |
| Kahramanmaraş'ta Meydana Gelen Depremler Hk.Basin Bülteni-27 | Shelter&meal\Evacuation   | 1 | 1 | 1 | 1: 836 | 1: 842 |
| Kahramanmaraş'ta Meydana Gelen Depremler Hk.Basin Bülteni-27 | AFAD                      | 1 | 1 | 1 | 1: 865 | 1: 868 |
| Kahramanmaraş'ta Meydana Gelen Depremler Hk.Basin Bülteni-27 | AFAD                      | 1 | 1 | 1 | 1: 865 | 1: 868 |
| Kahramanmaraş'ta Meydana Gelen Depremler Hk.Basin Bülteni-27 | Response\Coast guard&Navy | 1 | 1 | 1 | 1: 894 | 1: 907 |



|                                                           |                           |   |   |   |         |         |
|-----------------------------------------------------------|---------------------------|---|---|---|---------|---------|
| Kahramanmaraş'ta Meydana Gelen Deprem Hk.Basın Bülteni-27 | Response\Coast guard&Navy | 1 | 1 | 1 | 1: 894  | 1: 907  |
| Kahramanmaraş'ta Meydana Gelen Deprem Hk.Basın Bülteni-27 | Response\Number of staff  | 1 | 0 | 0 | 1: 971  | 1: 993  |
| Kahramanmaraş'ta Meydana Gelen Deprem Hk.Basın Bülteni-27 | Response\Search&Rescue    | 1 | 1 | 1 | 1: 971  | 1: 984  |
| Kahramanmaraş'ta Meydana Gelen Deprem Hk.Basın Bülteni-27 | Response\Search&Rescue    | 1 | 1 | 1 | 1: 971  | 1: 984  |
| Kahramanmaraş'ta Meydana Gelen Deprem Hk.Basın Bülteni-27 | Response\Number           | 0 | 1 | 0 | 1: 971  | 1: 993  |
| Kahramanmaraş'ta Meydana Gelen Deprem Hk.Basın Bülteni-27 | Response\Number of staff  | 1 | 0 | 0 | 1: 1022 | 1: 1044 |
| Kahramanmaraş'ta Meydana Gelen Deprem Hk.Basın Bülteni-27 | Response\Search&Rescue    | 1 | 1 | 1 | 1: 1022 | 1: 1035 |
| Kahramanmaraş'ta Meydana Gelen Deprem Hk.Basın Bülteni-27 | Response\Search&Rescue    | 1 | 1 | 1 | 1: 1022 | 1: 1035 |
| Kahramanmaraş'ta Meydana Gelen Deprem Hk.Basın Bülteni-27 | Response\Number           | 0 | 1 | 0 | 1: 1022 | 1: 1044 |
| Kahramanmaraş'ta Meydana Gelen Deprem Hk.Basın Bülteni-27 | Response\Number of staff  | 1 | 0 | 0 | 1: 1145 | 1: 1167 |
| Kahramanmaraş'ta Meydana Gelen Deprem Hk.Basın Bülteni-27 | Response\Search&Rescue    | 1 | 1 | 1 | 1: 1145 | 1: 1158 |
| Kahramanmaraş'ta Meydana Gelen Deprem Hk.Basın Bülteni-27 | Response\Search&Rescue    | 1 | 1 | 1 | 1: 1145 | 1: 1158 |
| Kahramanmaraş'ta Meydana Gelen Deprem Hk.Basın Bülteni-27 | Response\Number           | 0 | 1 | 0 | 1: 1145 | 1: 1167 |
| Kahramanmaraş'ta Meydana Gelen Deprem Hk.Basın Bülteni-27 | Disaster                  | 1 | 1 | 1 | 1: 1202 | 1: 1205 |
| Kahramanmaraş'ta Meydana Gelen Deprem Hk.Basın Bülteni-27 | Disaster                  | 1 | 1 | 1 | 1: 1202 | 1: 1205 |
| Kahramanmaraş'ta Meydana Gelen Deprem Hk.Basın Bülteni-27 | AFAD                      | 1 | 1 | 1 | 1: 1298 | 1: 1301 |

|                                                              |                           |   |   |   |         |         |
|--------------------------------------------------------------|---------------------------|---|---|---|---------|---------|
| Kahramanmaraş'ta Meydana Gelen Depremler Hk.Basin Bülteni-27 | AFAD                      | 1 | 1 | 1 | 1: 1298 | 1: 1301 |
| Kahramanmaraş'ta Meydana Gelen Depremler Hk.Basin Bülteni-27 | Response\Military         | 1 | 1 | 1 | 1: 1313 | 1: 1320 |
| Kahramanmaraş'ta Meydana Gelen Depremler Hk.Basin Bülteni-27 | Response\Military         | 1 | 1 | 1 | 1: 1313 | 1: 1320 |
| Kahramanmaraş'ta Meydana Gelen Depremler Hk.Basin Bülteni-27 | Response\Number of staff  | 1 | 0 | 0 | 1: 1432 | 1: 1446 |
| Kahramanmaraş'ta Meydana Gelen Depremler Hk.Basin Bülteni-27 | Response\Number           | 0 | 1 | 0 | 1: 1432 | 1: 1446 |
| Kahramanmaraş'ta Meydana Gelen Depremler Hk.Basin Bülteni-27 | Response\Number of staff  | 1 | 0 | 0 | 1: 1488 | 1: 1502 |
| Kahramanmaraş'ta Meydana Gelen Depremler Hk.Basin Bülteni-27 | Response\Number           | 0 | 1 | 0 | 1: 1488 | 1: 1502 |
| Kahramanmaraş'ta Meydana Gelen Depremler Hk.Basin Bülteni-27 | Disaster                  | 1 | 1 | 1 | 1: 1518 | 1: 1521 |
| Kahramanmaraş'ta Meydana Gelen Depremler Hk.Basin Bülteni-27 | Disaster                  | 1 | 1 | 1 | 1: 1518 | 1: 1521 |
| Kahramanmaraş'ta Meydana Gelen Depremler Hk.Basin Bülteni-27 | Disaster                  | 1 | 1 | 1 | 1: 1683 | 1: 1686 |
| Kahramanmaraş'ta Meydana Gelen Depremler Hk.Basin Bülteni-27 | Disaster                  | 1 | 1 | 1 | 1: 1683 | 1: 1686 |
| Kahramanmaraş'ta Meydana Gelen Depremler Hk.Basin Bülteni-27 | AFAD                      | 1 | 1 | 1 | 1: 1737 | 1: 1740 |
| Kahramanmaraş'ta Meydana Gelen Depremler Hk.Basin Bülteni-27 | AFAD                      | 1 | 1 | 1 | 1: 1737 | 1: 1740 |
| Kahramanmaraş'ta Meydana Gelen Depremler Hk.Basin Bülteni-27 | Response\Coast guard&Navy | 1 | 1 | 1 | 1: 1902 | 1: 1915 |
| Kahramanmaraş'ta Meydana Gelen Depremler Hk.Basin Bülteni-27 | Response\Coast guard&Navy | 1 | 1 | 1 | 1: 1902 | 1: 1915 |
| Kahramanmaraş'ta Meydana Gelen Depremler Hk.Basin Bülteni-27 | Response\Military         | 1 | 1 | 1 | 1: 1920 | 1: 1927 |

|                                                           |                           |   |   |   |         |         |
|-----------------------------------------------------------|---------------------------|---|---|---|---------|---------|
| Kahramanmaraş'ta Meydana Gelen Deprem Hk.Basin Bülteni-27 | Response\Military         | 1 | 1 | 1 | 1: 1920 | 1: 1927 |
| Kahramanmaraş'ta Meydana Gelen Deprem Hk.Basin Bülteni-27 | Shelter&meal\Evacuation   | 1 | 1 | 1 | 1: 2058 | 1: 2064 |
| Kahramanmaraş'ta Meydana Gelen Deprem Hk.Basin Bülteni-27 | Shelter&meal\Evacuation   | 1 | 1 | 1 | 1: 2058 | 1: 2064 |
| Kahramanmaraş'ta Meydana Gelen Deprem Hk.Basin Bülteni-27 | Response\Coast guard&Navy | 1 | 1 | 1 | 1: 2075 | 1: 2090 |
| Kahramanmaraş'ta Meydana Gelen Deprem Hk.Basin Bülteni-27 | Response\Coast guard&Navy | 1 | 1 | 1 | 1: 2075 | 1: 2090 |
| Kahramanmaraş'ta Meydana Gelen Deprem Hk.Basin Bülteni-27 | Response\Coast guard&Navy | 1 | 1 | 1 | 1: 2119 | 1: 2132 |
| Kahramanmaraş'ta Meydana Gelen Deprem Hk.Basin Bülteni-27 | Response\Coast guard&Navy | 1 | 1 | 1 | 1: 2119 | 1: 2132 |
| Kahramanmaraş'ta Meydana Gelen Deprem Hk.Basin Bülteni-27 | Disaster                  | 1 | 1 | 1 | 1: 2209 | 1: 2212 |
| Kahramanmaraş'ta Meydana Gelen Deprem Hk.Basin Bülteni-27 | Disaster                  | 1 | 1 | 1 | 1: 2209 | 1: 2212 |
| Kahramanmaraş'ta Meydana Gelen Deprem Hk.Basin Bülteni-27 | Shelter&meal\Sheltering   | 1 | 1 | 1 | 1: 2214 | 1: 2220 |
| Kahramanmaraş'ta Meydana Gelen Deprem Hk.Basin Bülteni-27 | Shelter&meal\Sheltering   | 1 | 1 | 1 | 1: 2214 | 1: 2220 |
| Kahramanmaraş'ta Meydana Gelen Deprem Hk.Basin Bülteni-27 | Earthquake                | 1 | 1 | 1 | 1: 2229 | 1: 2234 |
| Kahramanmaraş'ta Meydana Gelen Deprem Hk.Basin Bülteni-27 | Earthquake                | 1 | 1 | 1 | 1: 2229 | 1: 2234 |
| Kahramanmaraş'ta Meydana Gelen Deprem Hk.Basin Bülteni-27 | AFAD                      | 1 | 1 | 1 | 1: 2275 | 1: 2278 |
| Kahramanmaraş'ta Meydana Gelen Deprem Hk.Basin Bülteni-27 | AFAD                      | 1 | 1 | 1 | 1: 2275 | 1: 2278 |
| Kahramanmaraş'ta Meydana Gelen Deprem Hk.Basin Bülteni-27 | Response\Welfare service  | 1 | 1 | 1 | 1: 2289 | 1: 2301 |

|                                                           |                             |   |   |   |         |         |
|-----------------------------------------------------------|-----------------------------|---|---|---|---------|---------|
| Kahramanmaraş'ta Meydana Gelen Deprem Hk.Basın Bülteni-27 | Response\Welfare service    | 1 | 1 | 1 | 1: 2289 | 1: 2301 |
| Kahramanmaraş'ta Meydana Gelen Deprem Hk.Basın Bülteni-27 | Shelter&meal\Tent           | 1 | 1 | 1 | 1: 2375 | 1: 2379 |
| Kahramanmaraş'ta Meydana Gelen Deprem Hk.Basın Bülteni-27 | Shelter&meal\Tent           | 1 | 1 | 1 | 1: 2375 | 1: 2379 |
| Kahramanmaraş'ta Meydana Gelen Deprem Hk.Basın Bülteni-27 | Shelter&meal\Tent           | 1 | 1 | 1 | 1: 2440 | 1: 2444 |
| Kahramanmaraş'ta Meydana Gelen Deprem Hk.Basın Bülteni-27 | Shelter&meal\Tent           | 1 | 1 | 1 | 1: 2440 | 1: 2444 |
| Kahramanmaraş'ta Meydana Gelen Deprem Hk.Basın Bülteni-27 | Disaster                    | 1 | 1 | 1 | 1: 2476 | 1: 2479 |
| Kahramanmaraş'ta Meydana Gelen Deprem Hk.Basın Bülteni-27 | Disaster                    | 1 | 1 | 1 | 1: 2476 | 1: 2479 |
| Kahramanmaraş'ta Meydana Gelen Deprem Hk.Basın Bülteni-27 | AFAD                        | 1 | 1 | 1 | 1: 2506 | 1: 2509 |
| Kahramanmaraş'ta Meydana Gelen Deprem Hk.Basın Bülteni-27 | AFAD                        | 1 | 1 | 1 | 1: 2506 | 1: 2509 |
| Kahramanmaraş'ta Meydana Gelen Deprem Hk.Basın Bülteni-27 | Response\Military           | 1 | 1 | 1 | 1: 2517 | 1: 2524 |
| Kahramanmaraş'ta Meydana Gelen Deprem Hk.Basın Bülteni-27 | Response\Military           | 1 | 1 | 1 | 1: 2517 | 1: 2524 |
| Kahramanmaraş'ta Meydana Gelen Deprem Hk.Basın Bülteni-27 | Coordination\NGO            | 1 | 1 | 1 | 1: 2529 | 1: 2540 |
| Kahramanmaraş'ta Meydana Gelen Deprem Hk.Basın Bülteni-27 | Coordination\NGO            | 1 | 1 | 1 | 1: 2529 | 1: 2540 |
| Kahramanmaraş'ta Meydana Gelen Deprem Hk.Basın Bülteni-27 | Shelter&meal\Mobile kitchen | 1 | 1 | 1 | 1: 2621 | 1: 2632 |
| Kahramanmaraş'ta Meydana Gelen Deprem Hk.Basın Bülteni-27 | Shelter&meal\Mobile kitchen | 1 | 1 | 1 | 1: 2621 | 1: 2632 |
| Kahramanmaraş'ta Meydana Gelen Deprem Hk.Basın Bülteni-27 | Shelter&meal\Mobile bakery  | 1 | 1 | 1 | 1: 2655 | 1: 2665 |

|                                                           |                               |   |   |   |         |         |
|-----------------------------------------------------------|-------------------------------|---|---|---|---------|---------|
| Kahramanmaraş'ta Meydana Gelen Deprem Hk.Basın Bülteni-27 | Shelter&meal\Mobile bakery    | 1 | 1 | 1 | 1: 2655 | 1: 2665 |
| Kahramanmaraş'ta Meydana Gelen Deprem Hk.Basın Bülteni-27 | Disaster                      | 1 | 1 | 1 | 1: 2713 | 1: 2716 |
| Kahramanmaraş'ta Meydana Gelen Deprem Hk.Basın Bülteni-27 | Disaster                      | 1 | 1 | 1 | 1: 2713 | 1: 2716 |
| Kahramanmaraş'ta Meydana Gelen Deprem Hk.Basın Bülteni-27 | Shelter&meal\Hot meal         | 1 | 1 | 1 | 1: 2739 | 1: 2749 |
| Kahramanmaraş'ta Meydana Gelen Deprem Hk.Basın Bülteni-27 | Shelter&meal\Hot meal         | 1 | 1 | 1 | 1: 2739 | 1: 2749 |
| Kahramanmaraş'ta Meydana Gelen Deprem Hk.Basın Bülteni-27 | Disaster                      | 1 | 1 | 1 | 1: 2867 | 1: 2870 |
| Kahramanmaraş'ta Meydana Gelen Deprem Hk.Basın Bülteni-27 | Disaster                      | 1 | 1 | 1 | 1: 2867 | 1: 2870 |
| Kahramanmaraş'ta Meydana Gelen Deprem Hk.Basın Bülteni-27 | Response\Psychosocial support | 1 | 1 | 1 | 1: 2872 | 1: 2881 |
| Kahramanmaraş'ta Meydana Gelen Deprem Hk.Basın Bülteni-27 | Response\Psychosocial support | 1 | 1 | 1 | 1: 2872 | 1: 2881 |
| Kahramanmaraş'ta Meydana Gelen Deprem Hk.Basın Bülteni-27 | Response\Welfare service      | 1 | 1 | 1 | 1: 2905 | 1: 2917 |
| Kahramanmaraş'ta Meydana Gelen Deprem Hk.Basın Bülteni-27 | Response\Welfare service      | 1 | 1 | 1 | 1: 2905 | 1: 2917 |
| Kahramanmaraş'ta Meydana Gelen Deprem Hk.Basın Bülteni-27 | Kahramanmaraş                 | 1 | 0 | 0 | 1: 2928 | 1: 2940 |
| Kahramanmaraş'ta Meydana Gelen Deprem Hk.Basın Bülteni-27 | Pazarcık                      | 0 | 1 | 0 | 1: 2928 | 1: 2940 |
| Kahramanmaraş'ta Meydana Gelen Deprem Hk.Basın Bülteni-27 | Earthquake                    | 1 | 1 | 1 | 1: 3053 | 1: 3058 |
| Kahramanmaraş'ta Meydana Gelen Deprem Hk.Basın Bülteni-27 | Earthquake                    | 1 | 1 | 1 | 1: 3053 | 1: 3058 |
| Kahramanmaraş'ta Meydana Gelen Deprem Hk.Basın Bülteni-27 | Earthquake                    | 1 | 1 | 1 | 1: 3079 | 1: 3084 |

|                                                           |                               |   |   |   |         |         |
|-----------------------------------------------------------|-------------------------------|---|---|---|---------|---------|
| Kahramanmaraş'ta Meydana Gelen Deprem Hk.Basın Bülteni-27 | Earthquake                    | 1 | 1 | 1 | 1: 3079 | 1: 3084 |
| Kahramanmaraş'ta Meydana Gelen Deprem Hk.Basın Bülteni-27 | Response\Psychosocial support | 1 | 1 | 1 | 1: 3144 | 1: 3154 |
| Kahramanmaraş'ta Meydana Gelen Deprem Hk.Basın Bülteni-27 | Response\Psychosocial support | 1 | 1 | 1 | 1: 3144 | 1: 3154 |
| Kahramanmaraş'ta Meydana Gelen Deprem Hk.Basın Bülteni-27 | Kahramanmaraş                 | 1 | 0 | 0 | 2: 17   | 2: 29   |
| Kahramanmaraş'ta Meydana Gelen Deprem Hk.Basın Bülteni-27 | Pazarcık                      | 0 | 1 | 0 | 2: 17   | 2: 29   |
| Kahramanmaraş'ta Meydana Gelen Deprem Hk.Basın Bülteni-27 | Earthquake                    | 1 | 1 | 1 | 2: 48   | 2: 53   |
| Kahramanmaraş'ta Meydana Gelen Deprem Hk.Basın Bülteni-27 | Earthquake                    | 1 | 1 | 1 | 2: 48   | 2: 53   |
| Kahramanmaraş'ta Meydana Gelen Deprem Hk.Basın Bülteni-27 | AFAD                          | 1 | 1 | 1 | 2: 91   | 2: 94   |
| Kahramanmaraş'ta Meydana Gelen Deprem Hk.Basın Bülteni-27 | AFAD                          | 1 | 1 | 1 | 2: 91   | 2: 94   |
| Kahramanmaraş'ta Meydana Gelen Deprem Hk.Basın Bülteni-27 | Earthquake                    | 1 | 1 | 1 | 2: 133  | 2: 138  |
| Kahramanmaraş'ta Meydana Gelen Deprem Hk.Basın Bülteni-27 | Earthquake                    | 1 | 1 | 1 | 2: 133  | 2: 138  |
| Kahramanmaraş'ta Meydana Gelen Deprem Hk.Basın Bülteni-27 | Disaster                      | 1 | 1 | 1 | 2: 290  | 2: 293  |
| Kahramanmaraş'ta Meydana Gelen Deprem Hk.Basın Bülteni-27 | Disaster                      | 1 | 1 | 1 | 2: 290  | 2: 293  |
| Kahramanmaraş'ta Meydana Gelen Deprem Hk.Basın Bülteni-27 | Coordination\Public relations | 1 | 1 | 1 | 2: 449  | 2: 454  |
| Kahramanmaraş'ta Meydana Gelen Deprem Hk.Basın Bülteni-27 | Coordination\Public relations | 1 | 1 | 1 | 2: 449  | 2: 454  |
| Kahramanmaraş'ta Meydana Gelen Deprem Hk.Basın Bülteni-27 | AFAD                          | 1 | 1 | 1 | 2: 489  | 2: 492  |

|                                                                    |                           |   |   |   |        |        |
|--------------------------------------------------------------------|---------------------------|---|---|---|--------|--------|
| Kahramanmaraş'ta<br>Meydana Gelen<br>Deprem Hk.Basın<br>Bülteni-27 | AFAD                      | 1 | 1 | 1 | 2: 489 | 2: 492 |
| Kahramanmaraş'ta<br>Meydana Gelen<br>Deprem Hk.Basın<br>Bülteni-27 | AFAD                      | 1 | 1 | 1 | 2: 547 | 2: 550 |
| Kahramanmaraş'ta<br>Meydana Gelen<br>Deprem Hk.Basın<br>Bülteni-27 | AFAD                      | 1 | 1 | 1 | 2: 547 | 2: 550 |
| Kahramanmaraş'ta<br>Meydana Gelen<br>Deprem Hk.Basın<br>Bülteni-27 | AFAD                      | 1 | 1 | 1 | 2: 664 | 2: 667 |
| Kahramanmaraş'ta<br>Meydana Gelen<br>Deprem Hk.Basın<br>Bülteni-27 | AFAD                      | 1 | 1 | 1 | 2: 664 | 2: 667 |
| Kahramanmaraş'ta<br>Meydana Gelen<br>Deprem Hk.Basın<br>Bülteni-27 | Response\Search&Rescue    | 1 | 1 | 1 | 2: 758 | 2: 771 |
| Kahramanmaraş'ta<br>Meydana Gelen<br>Deprem Hk.Basın<br>Bülteni-27 | Response\Search&Rescue    | 1 | 1 | 1 | 2: 758 | 2: 771 |
| Kahramanmaraş'ta<br>Meydana Gelen<br>Deprem Hk.Basın<br>Bülteni-27 | Disaster                  | 1 | 1 | 1 | 2: 822 | 2: 825 |
| Kahramanmaraş'ta<br>Meydana Gelen<br>Deprem Hk.Basın<br>Bülteni-27 | Disaster                  | 1 | 1 | 1 | 2: 822 | 2: 825 |
| Kahramanmaraş'ta<br>Meydana Gelen<br>Deprem Hk.Basın<br>Bülteni-27 | AFAD                      | 1 | 1 | 1 | 2: 840 | 2: 843 |
| Kahramanmaraş'ta<br>Meydana Gelen<br>Deprem Hk.Basın<br>Bülteni-27 | AFAD                      | 1 | 1 | 1 | 2: 840 | 2: 843 |
| Kahramanmaraş'ta<br>Meydana Gelen<br>Deprem Hk.Basın<br>Bülteni-27 | Preparedness\Preparedness | 1 | 1 | 1 | 2: 904 | 2: 914 |
| Kahramanmaraş'ta<br>Meydana Gelen<br>Deprem Hk.Basın<br>Bülteni-27 | Preparedness\Preparedness | 1 | 1 | 1 | 2: 904 | 2: 914 |
| Kahramanmaraş'ta<br>Meydana Gelen<br>Deprem Hk.Basın<br>Bülteni-27 | Disaster                  | 1 | 1 | 1 | 2: 904 | 2: 907 |
| Kahramanmaraş'ta<br>Meydana Gelen<br>Deprem Hk.Basın<br>Bülteni-27 | Disaster                  | 1 | 1 | 1 | 2: 904 | 2: 907 |
| Kahramanmaraş'ta<br>Meydana Gelen<br>Deprem Hk.Basın<br>Bülteni-27 | Disaster                  | 1 | 1 | 1 | 2: 952 | 2: 955 |

|                                                           |                                 |   |   |   |         |         |
|-----------------------------------------------------------|---------------------------------|---|---|---|---------|---------|
| Kahramanmaraş'ta Meydana Gelen Deprem Hk.Basın Bülteni-27 | Disaster                        | 1 | 1 | 1 | 2: 952  | 2: 955  |
| Kahramanmaraş'ta Meydana Gelen Deprem Hk.Basın Bülteni-27 | Recovery\Fund drive             | 1 | 1 | 1 | 2: 1013 | 2: 1031 |
| Kahramanmaraş'ta Meydana Gelen Deprem Hk.Basın Bülteni-27 | Recovery\Fund drive             | 1 | 1 | 1 | 2: 1013 | 2: 1031 |
| Kahramanmaraş'ta Meydana Gelen Deprem Hk.Basın Bülteni-27 | Coordination\Social media       | 1 | 0 | 0 | 2: 1129 | 2: 1140 |
| Kahramanmaraş'ta Meydana Gelen Deprem Hk.Basın Bülteni-27 | Coordination\Social media usage | 0 | 1 | 0 | 2: 1129 | 2: 1140 |
| Kahramanmaraş'ta Meydana Gelen Deprem Hk.Basın Bülteni-27 | AFAD                            | 1 | 1 | 1 | 2: 1185 | 2: 1188 |
| Kahramanmaraş'ta Meydana Gelen Deprem Hk.Basın Bülteni-27 | AFAD                            | 1 | 1 | 1 | 2: 1185 | 2: 1188 |
| Kahramanmaraş'ta Meydana Gelen Deprem Hk.Basın Bülteni-27 | AFAD                            | 1 | 1 | 1 | 2: 1207 | 2: 1210 |
| Kahramanmaraş'ta Meydana Gelen Deprem Hk.Basın Bülteni-27 | AFAD                            | 1 | 1 | 1 | 2: 1207 | 2: 1210 |
| Kahramanmaraş'ta Meydana Gelen Deprem Hk.Basın Bülteni-27 | Coordination\Information        | 1 | 1 | 1 | 2: 1252 | 2: 1263 |
| Kahramanmaraş'ta Meydana Gelen Deprem Hk.Basın Bülteni-27 | Coordination\Information        | 1 | 1 | 1 | 2: 1252 | 2: 1263 |
| Kahramanmaraş'ta Meydana Gelen Deprem Hk.Basın Bülteni-27 | Recovery\Peacemaking            | 1 | 1 | 1 | 2: 1268 | 2: 1277 |
| Kahramanmaraş'ta Meydana Gelen Deprem Hk.Basın Bülteni-27 | Recovery\Peacemaking            | 1 | 1 | 1 | 2: 1268 | 2: 1277 |
| Kahramanmaraş'ta Meydana Gelen Deprem Hk.Basın Bülteni-27 | Coordination\Social media       | 1 | 0 | 0 | 2: 1324 | 2: 1335 |
| Kahramanmaraş'ta Meydana Gelen Deprem Hk.Basın Bülteni-27 | Coordination\Social media usage | 0 | 1 | 0 | 2: 1324 | 2: 1335 |
| Kahramanmaraş'ta Meydana Gelen Deprem Hk.Basın Bülteni-27 | Disaster                        | 1 | 1 | 1 | 2: 1426 | 2: 1429 |



|                                                              |               |   |   |   |         |         |
|--------------------------------------------------------------|---------------|---|---|---|---------|---------|
| Kahramanmaraş'ta Meydana Gelen Depremler Hk.Basın Bülteni-27 | Disaster      | 1 | 1 | 1 | 2: 1426 | 2: 1429 |
| Kahramanmaraş'ta Meydana Gelen Depremler Hk.Basın Bülteni-27 | Emergency     | 1 | 1 | 1 | 2: 1434 | 2: 1443 |
| Kahramanmaraş'ta Meydana Gelen Depremler Hk.Basın Bülteni-27 | Emergency     | 1 | 1 | 1 | 2: 1434 | 2: 1443 |
| Kahramanmaraş-Pazarcık'ta Meydana Gelen Deprem Hk. 16        | Kahramanmaraş | 1 | 0 | 0 | 1: 17   | 1: 29   |
| Kahramanmaraş-Pazarcık'ta Meydana Gelen Deprem Hk. 16        | Pazarcık      | 0 | 1 | 0 | 1: 17   | 1: 29   |
| Kahramanmaraş-Pazarcık'ta Meydana Gelen Deprem Hk. 16        | Earthquake    | 1 | 1 | 1 | 1: 57   | 1: 62   |
| Kahramanmaraş-Pazarcık'ta Meydana Gelen Deprem Hk. 16        | Earthquake    | 1 | 1 | 1 | 1: 57   | 1: 62   |
| Kahramanmaraş-Pazarcık'ta Meydana Gelen Deprem Hk. 16        | AFAD          | 1 | 1 | 1 | 1: 100  | 1: 103  |
| Kahramanmaraş-Pazarcık'ta Meydana Gelen Deprem Hk. 16        | AFAD          | 1 | 1 | 1 | 1: 100  | 1: 103  |
| Kahramanmaraş-Pazarcık'ta Meydana Gelen Deprem Hk. 16        | Earthquake    | 1 | 1 | 1 | 1: 151  | 1: 156  |
| Kahramanmaraş-Pazarcık'ta Meydana Gelen Deprem Hk. 16        | Earthquake    | 1 | 1 | 1 | 1: 151  | 1: 156  |
| Kahramanmaraş-Pazarcık'ta Meydana Gelen Deprem Hk. 16        | Kahramanmaraş | 1 | 0 | 0 | 1: 184  | 1: 196  |
| Kahramanmaraş-Pazarcık'ta Meydana Gelen Deprem Hk. 16        | Pazarcık      | 0 | 1 | 0 | 1: 184  | 1: 196  |
| Kahramanmaraş-Pazarcık'ta Meydana Gelen Deprem Hk. 16        | Earthquake    | 1 | 1 | 1 | 1: 224  | 1: 229  |
| Kahramanmaraş-Pazarcık'ta Meydana Gelen Deprem Hk. 16        | Earthquake    | 1 | 1 | 1 | 1: 224  | 1: 229  |
| Kahramanmaraş-Pazarcık'ta Meydana Gelen Deprem Hk. 16        | Kahramanmaraş | 1 | 0 | 0 | 1: 305  | 1: 317  |
| Kahramanmaraş-Pazarcık'ta Meydana Gelen Deprem Hk. 16        | Pazarcık      | 0 | 1 | 0 | 1: 305  | 1: 317  |
| Kahramanmaraş-Pazarcık'ta Meydana Gelen Deprem Hk. 16        | Earthquake    | 1 | 1 | 1 | 1: 345  | 1: 350  |
| Kahramanmaraş-Pazarcık'ta Meydana Gelen Deprem Hk. 16        | Earthquake    | 1 | 1 | 1 | 1: 345  | 1: 350  |

|                                                       |                         |   |   |   |         |         |
|-------------------------------------------------------|-------------------------|---|---|---|---------|---------|
| Kahramanmaraş-Pazarcık'ta Meydana Gelen Deprem Hk. 16 | Kahramanmaraş           | 1 | 0 | 0 | 1: 408  | 1: 420  |
| Kahramanmaraş-Pazarcık'ta Meydana Gelen Deprem Hk. 16 | Pazarcık                | 0 | 1 | 0 | 1: 408  | 1: 420  |
| Kahramanmaraş-Pazarcık'ta Meydana Gelen Deprem Hk. 16 | Earthquake              | 1 | 1 | 1 | 1: 503  | 1: 508  |
| Kahramanmaraş-Pazarcık'ta Meydana Gelen Deprem Hk. 16 | Earthquake              | 1 | 1 | 1 | 1: 503  | 1: 508  |
| Kahramanmaraş-Pazarcık'ta Meydana Gelen Deprem Hk. 16 | Kahramanmaraş           | 1 | 0 | 0 | 1: 577  | 1: 589  |
| Kahramanmaraş-Pazarcık'ta Meydana Gelen Deprem Hk. 16 | Pazarcık                | 0 | 1 | 0 | 1: 577  | 1: 589  |
| Kahramanmaraş-Pazarcık'ta Meydana Gelen Deprem Hk. 16 | Earthquake              | 1 | 1 | 1 | 1: 778  | 1: 783  |
| Kahramanmaraş-Pazarcık'ta Meydana Gelen Deprem Hk. 16 | Earthquake              | 1 | 1 | 1 | 1: 778  | 1: 783  |
| Kahramanmaraş-Pazarcık'ta Meydana Gelen Deprem Hk. 16 | Shelter&meal\Sheltering | 1 | 1 | 1 | 1: 807  | 1: 813  |
| Kahramanmaraş-Pazarcık'ta Meydana Gelen Deprem Hk. 16 | Shelter&meal\Sheltering | 1 | 1 | 1 | 1: 807  | 1: 813  |
| Kahramanmaraş-Pazarcık'ta Meydana Gelen Deprem Hk. 16 | AFAD                    | 1 | 1 | 1 | 1: 838  | 1: 841  |
| Kahramanmaraş-Pazarcık'ta Meydana Gelen Deprem Hk. 16 | AFAD                    | 1 | 1 | 1 | 1: 838  | 1: 841  |
| Kahramanmaraş-Pazarcık'ta Meydana Gelen Deprem Hk. 16 | Shelter&meal\Tent       | 1 | 1 | 1 | 1: 854  | 1: 858  |
| Kahramanmaraş-Pazarcık'ta Meydana Gelen Deprem Hk. 16 | Shelter&meal\Tent       | 1 | 1 | 1 | 1: 854  | 1: 858  |
| Kahramanmaraş-Pazarcık'ta Meydana Gelen Deprem Hk. 16 | AFAD                    | 1 | 1 | 1 | 1: 894  | 1: 897  |
| Kahramanmaraş-Pazarcık'ta Meydana Gelen Deprem Hk. 16 | AFAD                    | 1 | 1 | 1 | 1: 894  | 1: 897  |
| Kahramanmaraş-Pazarcık'ta Meydana Gelen Deprem Hk. 16 | Response\Military       | 1 | 1 | 1 | 1: 955  | 1: 962  |
| Kahramanmaraş-Pazarcık'ta Meydana Gelen Deprem Hk. 16 | Response\Military       | 1 | 1 | 1 | 1: 955  | 1: 962  |
| Kahramanmaraş-Pazarcık'ta Meydana Gelen Deprem Hk. 16 | Response\Search&Rescue  | 1 | 1 | 1 | 1: 1100 | 1: 1113 |
| Kahramanmaraş-Pazarcık'ta Meydana Gelen Deprem Hk. 16 | Response\Search&Rescue  | 1 | 1 | 1 | 1: 1100 | 1: 1113 |

|                                                       |                           |   |   |   |         |         |
|-------------------------------------------------------|---------------------------|---|---|---|---------|---------|
| Kahramanmaraş-Pazarcık'ta Meydana Gelen Deprem Hk. 16 | Response\Number of staff  | 1 | 0 | 0 | 1: 1154 | 1: 1168 |
| Kahramanmaraş-Pazarcık'ta Meydana Gelen Deprem Hk. 16 | Response\Number           | 0 | 1 | 0 | 1: 1154 | 1: 1168 |
| Kahramanmaraş-Pazarcık'ta Meydana Gelen Deprem Hk. 16 | Disaster                  | 1 | 1 | 1 | 1: 1288 | 1: 1291 |
| Kahramanmaraş-Pazarcık'ta Meydana Gelen Deprem Hk. 16 | Disaster                  | 1 | 1 | 1 | 1: 1288 | 1: 1291 |
| Kahramanmaraş-Pazarcık'ta Meydana Gelen Deprem Hk. 16 | Disaster                  | 1 | 1 | 1 | 1: 1321 | 1: 1324 |
| Kahramanmaraş-Pazarcık'ta Meydana Gelen Deprem Hk. 16 | Disaster                  | 1 | 1 | 1 | 1: 1321 | 1: 1324 |
| Kahramanmaraş-Pazarcık'ta Meydana Gelen Deprem Hk. 16 | Disaster                  | 1 | 1 | 1 | 1: 1485 | 1: 1488 |
| Kahramanmaraş-Pazarcık'ta Meydana Gelen Deprem Hk. 16 | Disaster                  | 1 | 1 | 1 | 1: 1485 | 1: 1488 |
| Kahramanmaraş-Pazarcık'ta Meydana Gelen Deprem Hk. 16 | Response\Coast guard&Navy | 1 | 1 | 1 | 1: 1608 | 1: 1621 |
| Kahramanmaraş-Pazarcık'ta Meydana Gelen Deprem Hk. 16 | Response\Coast guard&Navy | 1 | 1 | 1 | 1: 1608 | 1: 1621 |
| Kahramanmaraş-Pazarcık'ta Meydana Gelen Deprem Hk. 16 | Response\Military         | 1 | 1 | 1 | 1: 1626 | 1: 1633 |
| Kahramanmaraş-Pazarcık'ta Meydana Gelen Deprem Hk. 16 | Response\Military         | 1 | 1 | 1 | 1: 1626 | 1: 1633 |
| Kahramanmaraş-Pazarcık'ta Meydana Gelen Deprem Hk. 16 | Shelter&meal\Evacuation   | 1 | 1 | 1 | 1: 1830 | 1: 1836 |
| Kahramanmaraş-Pazarcık'ta Meydana Gelen Deprem Hk. 16 | Shelter&meal\Evacuation   | 1 | 1 | 1 | 1: 1830 | 1: 1836 |
| Kahramanmaraş-Pazarcık'ta Meydana Gelen Deprem Hk. 16 | Response\Coast guard&Navy | 1 | 1 | 1 | 1: 1847 | 1: 1862 |
| Kahramanmaraş-Pazarcık'ta Meydana Gelen Deprem Hk. 16 | Response\Coast guard&Navy | 1 | 1 | 1 | 1: 1847 | 1: 1862 |
| Kahramanmaraş-Pazarcık'ta Meydana Gelen Deprem Hk. 16 | Response\Coast guard&Navy | 1 | 1 | 1 | 1: 1890 | 1: 1903 |
| Kahramanmaraş-Pazarcık'ta Meydana Gelen Deprem Hk. 16 | Response\Coast guard&Navy | 1 | 1 | 1 | 1: 1890 | 1: 1903 |
| Kahramanmaraş-Pazarcık'ta Meydana Gelen Deprem Hk. 16 | Disaster                  | 1 | 1 | 1 | 1: 1980 | 1: 1983 |
| Kahramanmaraş-Pazarcık'ta Meydana Gelen Deprem Hk. 16 | Disaster                  | 1 | 1 | 1 | 1: 1980 | 1: 1983 |

|                                                              |                             |   |   |   |         |         |
|--------------------------------------------------------------|-----------------------------|---|---|---|---------|---------|
| Kahramanmaraş-<br>Pazarcık'ta Meydana<br>Gelen Deprem Hk. 16 | Shelter&meal\Sheltering     | 1 | 1 | 1 | 1: 1985 | 1: 1991 |
| Kahramanmaraş-<br>Pazarcık'ta Meydana<br>Gelen Deprem Hk. 16 | Shelter&meal\Sheltering     | 1 | 1 | 1 | 1: 1985 | 1: 1991 |
| Kahramanmaraş-<br>Pazarcık'ta Meydana<br>Gelen Deprem Hk. 16 | Earthquake                  | 1 | 1 | 1 | 1: 2000 | 1: 2005 |
| Kahramanmaraş-<br>Pazarcık'ta Meydana<br>Gelen Deprem Hk. 16 | Earthquake                  | 1 | 1 | 1 | 1: 2000 | 1: 2005 |
| Kahramanmaraş-<br>Pazarcık'ta Meydana<br>Gelen Deprem Hk. 16 | AFAD                        | 1 | 1 | 1 | 1: 2053 | 1: 2056 |
| Kahramanmaraş-<br>Pazarcık'ta Meydana<br>Gelen Deprem Hk. 16 | AFAD                        | 1 | 1 | 1 | 1: 2053 | 1: 2056 |
| Kahramanmaraş-<br>Pazarcık'ta Meydana<br>Gelen Deprem Hk. 16 | Shelter&meal\Tent           | 1 | 1 | 1 | 1: 2069 | 1: 2073 |
| Kahramanmaraş-<br>Pazarcık'ta Meydana<br>Gelen Deprem Hk. 16 | Shelter&meal\Tent           | 1 | 1 | 1 | 1: 2069 | 1: 2073 |
| Kahramanmaraş-<br>Pazarcık'ta Meydana<br>Gelen Deprem Hk. 16 | AFAD                        | 1 | 1 | 1 | 1: 2100 | 1: 2103 |
| Kahramanmaraş-<br>Pazarcık'ta Meydana<br>Gelen Deprem Hk. 16 | AFAD                        | 1 | 1 | 1 | 1: 2100 | 1: 2103 |
| Kahramanmaraş-<br>Pazarcık'ta Meydana<br>Gelen Deprem Hk. 16 | Shelter&meal\Tent           | 1 | 1 | 1 | 1: 2116 | 1: 2120 |
| Kahramanmaraş-<br>Pazarcık'ta Meydana<br>Gelen Deprem Hk. 16 | Shelter&meal\Tent           | 1 | 1 | 1 | 1: 2116 | 1: 2120 |
| Kahramanmaraş-<br>Pazarcık'ta Meydana<br>Gelen Deprem Hk. 16 | Disaster                    | 1 | 1 | 1 | 1: 2227 | 1: 2230 |
| Kahramanmaraş-<br>Pazarcık'ta Meydana<br>Gelen Deprem Hk. 16 | Disaster                    | 1 | 1 | 1 | 1: 2227 | 1: 2230 |
| Kahramanmaraş-<br>Pazarcık'ta Meydana<br>Gelen Deprem Hk. 16 | Shelter&meal\Mobile kitchen | 1 | 1 | 1 | 1: 2279 | 1: 2290 |
| Kahramanmaraş-<br>Pazarcık'ta Meydana<br>Gelen Deprem Hk. 16 | Shelter&meal\Mobile kitchen | 1 | 1 | 1 | 1: 2279 | 1: 2290 |
| Kahramanmaraş-<br>Pazarcık'ta Meydana<br>Gelen Deprem Hk. 16 | Shelter&meal\Mobile bakery  | 1 | 1 | 1 | 1: 2327 | 1: 2337 |
| Kahramanmaraş-<br>Pazarcık'ta Meydana<br>Gelen Deprem Hk. 16 | Shelter&meal\Mobile bakery  | 1 | 1 | 1 | 1: 2327 | 1: 2337 |
| Kahramanmaraş-<br>Pazarcık'ta Meydana<br>Gelen Deprem Hk. 16 | Response\Military           | 1 | 1 | 1 | 1: 2403 | 1: 2410 |
| Kahramanmaraş-<br>Pazarcık'ta Meydana<br>Gelen Deprem Hk. 16 | Response\Military           | 1 | 1 | 1 | 1: 2403 | 1: 2410 |

|                                                              |                               |   |   |   |         |         |
|--------------------------------------------------------------|-------------------------------|---|---|---|---------|---------|
| Kahramanmaraş-<br>Pazarcık'ta Meydana<br>Gelen Deprem Hk. 16 | Shelter&meal\Mobile kitchen   | 1 | 1 | 1 | 1: 2418 | 1: 2429 |
| Kahramanmaraş-<br>Pazarcık'ta Meydana<br>Gelen Deprem Hk. 16 | Shelter&meal\Mobile kitchen   | 1 | 1 | 1 | 1: 2418 | 1: 2429 |
| Kahramanmaraş-<br>Pazarcık'ta Meydana<br>Gelen Deprem Hk. 16 | Shelter&meal\Mobile bakery    | 1 | 1 | 1 | 1: 2434 | 1: 2444 |
| Kahramanmaraş-<br>Pazarcık'ta Meydana<br>Gelen Deprem Hk. 16 | Shelter&meal\Mobile bakery    | 1 | 1 | 1 | 1: 2434 | 1: 2444 |
| Kahramanmaraş-<br>Pazarcık'ta Meydana<br>Gelen Deprem Hk. 16 | AFAD                          | 1 | 1 | 1 | 1: 2447 | 1: 2450 |
| Kahramanmaraş-<br>Pazarcık'ta Meydana<br>Gelen Deprem Hk. 16 | AFAD                          | 1 | 1 | 1 | 1: 2447 | 1: 2450 |
| Kahramanmaraş-<br>Pazarcık'ta Meydana<br>Gelen Deprem Hk. 16 | Shelter&meal\Mobile kitchen   | 1 | 1 | 1 | 1: 2510 | 1: 2521 |
| Kahramanmaraş-<br>Pazarcık'ta Meydana<br>Gelen Deprem Hk. 16 | Shelter&meal\Mobile kitchen   | 1 | 1 | 1 | 1: 2510 | 1: 2521 |
| Kahramanmaraş-<br>Pazarcık'ta Meydana<br>Gelen Deprem Hk. 16 | Disaster                      | 1 | 1 | 1 | 1: 2546 | 1: 2549 |
| Kahramanmaraş-<br>Pazarcık'ta Meydana<br>Gelen Deprem Hk. 16 | Disaster                      | 1 | 1 | 1 | 1: 2546 | 1: 2549 |
| Kahramanmaraş-<br>Pazarcık'ta Meydana<br>Gelen Deprem Hk. 16 | Shelter&meal\Hot meal         | 1 | 1 | 1 | 1: 2573 | 1: 2583 |
| Kahramanmaraş-<br>Pazarcık'ta Meydana<br>Gelen Deprem Hk. 16 | Shelter&meal\Hot meal         | 1 | 1 | 1 | 1: 2573 | 1: 2583 |
| Kahramanmaraş-<br>Pazarcık'ta Meydana<br>Gelen Deprem Hk. 16 | Disaster                      | 1 | 1 | 1 | 1: 2727 | 1: 2730 |
| Kahramanmaraş-<br>Pazarcık'ta Meydana<br>Gelen Deprem Hk. 16 | Disaster                      | 1 | 1 | 1 | 1: 2727 | 1: 2730 |
| Kahramanmaraş-<br>Pazarcık'ta Meydana<br>Gelen Deprem Hk. 16 | Response\Psychosocial support | 1 | 1 | 1 | 1: 2732 | 1: 2741 |
| Kahramanmaraş-<br>Pazarcık'ta Meydana<br>Gelen Deprem Hk. 16 | Response\Psychosocial support | 1 | 1 | 1 | 1: 2732 | 1: 2741 |
| Kahramanmaraş-<br>Pazarcık'ta Meydana<br>Gelen Deprem Hk. 16 | Response\Welfare service      | 1 | 1 | 1 | 1: 2765 | 1: 2777 |
| Kahramanmaraş-<br>Pazarcık'ta Meydana<br>Gelen Deprem Hk. 16 | Response\Welfare service      | 1 | 1 | 1 | 1: 2765 | 1: 2777 |
| Kahramanmaraş-<br>Pazarcık'ta Meydana<br>Gelen Deprem Hk. 16 | Kahramanmaraş                 | 1 | 0 | 0 | 1: 2788 | 1: 2800 |
| Kahramanmaraş-<br>Pazarcık'ta Meydana<br>Gelen Deprem Hk. 16 | Pazarcık                      | 0 | 1 | 0 | 1: 2788 | 1: 2800 |

|                                                              |                               |   |   |   |        |        |
|--------------------------------------------------------------|-------------------------------|---|---|---|--------|--------|
| Kahramanmaraş-<br>Pazarcık'ta Meydana<br>Gelen Deprem Hk. 16 | Kahramanmaraş                 | 1 | 0 | 0 | 2: 17  | 2: 29  |
| Kahramanmaraş-<br>Pazarcık'ta Meydana<br>Gelen Deprem Hk. 16 | Pazarcık                      | 0 | 1 | 0 | 2: 17  | 2: 29  |
| Kahramanmaraş-<br>Pazarcık'ta Meydana<br>Gelen Deprem Hk. 16 | Earthquake                    | 1 | 1 | 1 | 2: 57  | 2: 62  |
| Kahramanmaraş-<br>Pazarcık'ta Meydana<br>Gelen Deprem Hk. 16 | Earthquake                    | 1 | 1 | 1 | 2: 57  | 2: 62  |
| Kahramanmaraş-<br>Pazarcık'ta Meydana<br>Gelen Deprem Hk. 16 | AFAD                          | 1 | 1 | 1 | 2: 100 | 2: 103 |
| Kahramanmaraş-<br>Pazarcık'ta Meydana<br>Gelen Deprem Hk. 16 | AFAD                          | 1 | 1 | 1 | 2: 100 | 2: 103 |
| Kahramanmaraş-<br>Pazarcık'ta Meydana<br>Gelen Deprem Hk. 16 | Earthquake                    | 1 | 1 | 1 | 2: 151 | 2: 156 |
| Kahramanmaraş-<br>Pazarcık'ta Meydana<br>Gelen Deprem Hk. 16 | Earthquake                    | 1 | 1 | 1 | 2: 151 | 2: 156 |
| Kahramanmaraş-<br>Pazarcık'ta Meydana<br>Gelen Deprem Hk. 16 | Disaster                      | 1 | 1 | 1 | 2: 308 | 2: 311 |
| Kahramanmaraş-<br>Pazarcık'ta Meydana<br>Gelen Deprem Hk. 16 | Disaster                      | 1 | 1 | 1 | 2: 308 | 2: 311 |
| Kahramanmaraş-<br>Pazarcık'ta Meydana<br>Gelen Deprem Hk. 16 | Coordination\Public relations | 1 | 1 | 1 | 2: 467 | 2: 472 |
| Kahramanmaraş-<br>Pazarcık'ta Meydana<br>Gelen Deprem Hk. 16 | Coordination\Public relations | 1 | 1 | 1 | 2: 467 | 2: 472 |
| Kahramanmaraş-<br>Pazarcık'ta Meydana<br>Gelen Deprem Hk. 16 | AFAD                          | 1 | 1 | 1 | 2: 507 | 2: 510 |
| Kahramanmaraş-<br>Pazarcık'ta Meydana<br>Gelen Deprem Hk. 16 | AFAD                          | 1 | 1 | 1 | 2: 507 | 2: 510 |
| Kahramanmaraş-<br>Pazarcık'ta Meydana<br>Gelen Deprem Hk. 16 | AFAD                          | 1 | 1 | 1 | 2: 565 | 2: 568 |
| Kahramanmaraş-<br>Pazarcık'ta Meydana<br>Gelen Deprem Hk. 16 | AFAD                          | 1 | 1 | 1 | 2: 565 | 2: 568 |
| Kahramanmaraş-<br>Pazarcık'ta Meydana<br>Gelen Deprem Hk. 16 | AFAD                          | 1 | 1 | 1 | 2: 682 | 2: 685 |
| Kahramanmaraş-<br>Pazarcık'ta Meydana<br>Gelen Deprem Hk. 16 | AFAD                          | 1 | 1 | 1 | 2: 682 | 2: 685 |
| Kahramanmaraş-<br>Pazarcık'ta Meydana<br>Gelen Deprem Hk. 16 | Response\Search&Rescue        | 1 | 1 | 1 | 2: 776 | 2: 789 |
| Kahramanmaraş-<br>Pazarcık'ta Meydana<br>Gelen Deprem Hk. 16 | Response\Search&Rescue        | 1 | 1 | 1 | 2: 776 | 2: 789 |

|                                                              |                                 |   |   |   |         |         |
|--------------------------------------------------------------|---------------------------------|---|---|---|---------|---------|
| Kahramanmaraş-<br>Pazarcık'ta Meydana<br>Gelen Deprem Hk. 16 | Disaster                        | 1 | 1 | 1 | 2: 840  | 2: 843  |
| Kahramanmaraş-<br>Pazarcık'ta Meydana<br>Gelen Deprem Hk. 16 | Disaster                        | 1 | 1 | 1 | 2: 840  | 2: 843  |
| Kahramanmaraş-<br>Pazarcık'ta Meydana<br>Gelen Deprem Hk. 16 | AFAD                            | 1 | 1 | 1 | 2: 858  | 2: 861  |
| Kahramanmaraş-<br>Pazarcık'ta Meydana<br>Gelen Deprem Hk. 16 | AFAD                            | 1 | 1 | 1 | 2: 858  | 2: 861  |
| Kahramanmaraş-<br>Pazarcık'ta Meydana<br>Gelen Deprem Hk. 16 | Preparedness\Preparedness       | 1 | 1 | 1 | 2: 922  | 2: 932  |
| Kahramanmaraş-<br>Pazarcık'ta Meydana<br>Gelen Deprem Hk. 16 | Preparedness\Preparedness       | 1 | 1 | 1 | 2: 922  | 2: 932  |
| Kahramanmaraş-<br>Pazarcık'ta Meydana<br>Gelen Deprem Hk. 16 | Disaster                        | 1 | 1 | 1 | 2: 922  | 2: 925  |
| Kahramanmaraş-<br>Pazarcık'ta Meydana<br>Gelen Deprem Hk. 16 | Disaster                        | 1 | 1 | 1 | 2: 922  | 2: 925  |
| Kahramanmaraş-<br>Pazarcık'ta Meydana<br>Gelen Deprem Hk. 16 | Disaster                        | 1 | 1 | 1 | 2: 970  | 2: 973  |
| Kahramanmaraş-<br>Pazarcık'ta Meydana<br>Gelen Deprem Hk. 16 | Disaster                        | 1 | 1 | 1 | 2: 970  | 2: 973  |
| Kahramanmaraş-<br>Pazarcık'ta Meydana<br>Gelen Deprem Hk. 16 | Recovery\Fund drive             | 1 | 1 | 1 | 2: 1031 | 2: 1049 |
| Kahramanmaraş-<br>Pazarcık'ta Meydana<br>Gelen Deprem Hk. 16 | Recovery\Fund drive             | 1 | 1 | 1 | 2: 1031 | 2: 1049 |
| Kahramanmaraş-<br>Pazarcık'ta Meydana<br>Gelen Deprem Hk. 16 | Coordination\Social media       | 1 | 0 | 0 | 2: 1147 | 2: 1158 |
| Kahramanmaraş-<br>Pazarcık'ta Meydana<br>Gelen Deprem Hk. 16 | Coordination\Social media usage | 0 | 1 | 0 | 2: 1147 | 2: 1158 |
| Kahramanmaraş-<br>Pazarcık'ta Meydana<br>Gelen Deprem Hk. 16 | AFAD                            | 1 | 1 | 1 | 2: 1203 | 2: 1206 |
| Kahramanmaraş-<br>Pazarcık'ta Meydana<br>Gelen Deprem Hk. 16 | AFAD                            | 1 | 1 | 1 | 2: 1203 | 2: 1206 |
| Kahramanmaraş-<br>Pazarcık'ta Meydana<br>Gelen Deprem Hk. 16 | AFAD                            | 1 | 1 | 1 | 2: 1225 | 2: 1228 |
| Kahramanmaraş-<br>Pazarcık'ta Meydana<br>Gelen Deprem Hk. 16 | AFAD                            | 1 | 1 | 1 | 2: 1225 | 2: 1228 |
| Kahramanmaraş-<br>Pazarcık'ta Meydana<br>Gelen Deprem Hk. 16 | Coordination\Information        | 1 | 1 | 1 | 2: 1270 | 2: 1281 |
| Kahramanmaraş-<br>Pazarcık'ta Meydana<br>Gelen Deprem Hk. 16 | Coordination\Information        | 1 | 1 | 1 | 2: 1270 | 2: 1281 |

|                                                       |                                 |   |   |   |         |         |
|-------------------------------------------------------|---------------------------------|---|---|---|---------|---------|
| Kahramanmaraş-Pazarcık'ta Meydana Gelen Deprem Hk. 16 | Recovery\Peacemaking            | 1 | 1 | 1 | 2: 1286 | 2: 1295 |
| Kahramanmaraş-Pazarcık'ta Meydana Gelen Deprem Hk. 16 | Recovery\Peacemaking            | 1 | 1 | 1 | 2: 1286 | 2: 1295 |
| Kahramanmaraş-Pazarcık'ta Meydana Gelen Deprem Hk. 16 | Coordination\Social media       | 1 | 0 | 0 | 2: 1342 | 2: 1353 |
| Kahramanmaraş-Pazarcık'ta Meydana Gelen Deprem Hk. 16 | Coordination\Social media usage | 0 | 1 | 0 | 2: 1342 | 2: 1353 |
| Kahramanmaraş-Pazarcık'ta Meydana Gelen Deprem Hk. 16 | Disaster                        | 1 | 1 | 1 | 2: 1444 | 2: 1447 |
| Kahramanmaraş-Pazarcık'ta Meydana Gelen Deprem Hk. 16 | Disaster                        | 1 | 1 | 1 | 2: 1444 | 2: 1447 |
| Kahramanmaraş-Pazarcık'ta Meydana Gelen Deprem Hk. 16 | Emergency                       | 1 | 1 | 1 | 2: 1452 | 2: 1461 |
| Kahramanmaraş-Pazarcık'ta Meydana Gelen Deprem Hk. 16 | Emergency                       | 1 | 1 | 1 | 2: 1452 | 2: 1461 |
| Kahramanmaraş-Pazarcık'ta Meydana Gelen Deprem Hk. 1  | Kahramanmaraş                   | 1 | 0 | 0 | 1: 17   | 1: 29   |
| Kahramanmaraş-Pazarcık'ta Meydana Gelen Deprem Hk. 1  | Pazarcık                        | 0 | 1 | 0 | 1: 17   | 1: 29   |
| Kahramanmaraş-Pazarcık'ta Meydana Gelen Deprem Hk. 1  | Earthquake                      | 1 | 1 | 1 | 1: 57   | 1: 62   |
| Kahramanmaraş-Pazarcık'ta Meydana Gelen Deprem Hk. 1  | Earthquake                      | 1 | 1 | 1 | 1: 57   | 1: 62   |
| Kahramanmaraş-Pazarcık'ta Meydana Gelen Deprem Hk. 1  | AFAD                            | 1 | 1 | 1 | 1: 97   | 1: 100  |
| Kahramanmaraş-Pazarcık'ta Meydana Gelen Deprem Hk. 1  | AFAD                            | 1 | 1 | 1 | 1: 97   | 1: 100  |
| Kahramanmaraş-Pazarcık'ta Meydana Gelen Deprem Hk. 1  | Earthquake                      | 1 | 1 | 1 | 1: 148  | 1: 153  |
| Kahramanmaraş-Pazarcık'ta Meydana Gelen Deprem Hk. 1  | Earthquake                      | 1 | 1 | 1 | 1: 148  | 1: 153  |
| Kahramanmaraş-Pazarcık'ta Meydana Gelen Deprem Hk. 1  | Kahramanmaraş                   | 1 | 0 | 0 | 1: 180  | 1: 192  |
| Kahramanmaraş-Pazarcık'ta Meydana Gelen Deprem Hk. 1  | Pazarcık                        | 0 | 1 | 0 | 1: 180  | 1: 192  |
| Kahramanmaraş-Pazarcık'ta Meydana Gelen Deprem Hk. 1  | Earthquake                      | 1 | 1 | 1 | 1: 220  | 1: 225  |
| Kahramanmaraş-Pazarcık'ta Meydana Gelen Deprem Hk. 1  | Earthquake                      | 1 | 1 | 1 | 1: 220  | 1: 225  |



|                                                      |               |   |   |   |        |        |
|------------------------------------------------------|---------------|---|---|---|--------|--------|
| Kahramanmaraş-Pazarcık'ta Meydana Gelen Deprem Hk. 1 | Kahramanmaraş | 1 | 0 | 0 | 1: 298 | 1: 310 |
| Kahramanmaraş-Pazarcık'ta Meydana Gelen Deprem Hk. 1 | Pazarcık      | 0 | 1 | 0 | 1: 298 | 1: 310 |
| Kahramanmaraş-Pazarcık'ta Meydana Gelen Deprem Hk. 1 | Earthquake    | 1 | 1 | 1 | 1: 338 | 1: 343 |
| Kahramanmaraş-Pazarcık'ta Meydana Gelen Deprem Hk. 1 | Earthquake    | 1 | 1 | 1 | 1: 338 | 1: 343 |
| Kahramanmaraş-Pazarcık'ta Meydana Gelen Deprem Hk. 1 | Kahramanmaraş | 1 | 0 | 0 | 1: 354 | 1: 366 |
| Kahramanmaraş-Pazarcık'ta Meydana Gelen Deprem Hk. 1 | Pazarcık      | 0 | 1 | 0 | 1: 354 | 1: 366 |
| Kahramanmaraş-Pazarcık'ta Meydana Gelen Deprem Hk. 1 | Earthquake    | 1 | 1 | 1 | 1: 448 | 1: 453 |
| Kahramanmaraş-Pazarcık'ta Meydana Gelen Deprem Hk. 1 | Earthquake    | 1 | 1 | 1 | 1: 448 | 1: 453 |
| Kahramanmaraş-Pazarcık'ta Meydana Gelen Deprem Hk. 1 | Earthquake    | 1 | 1 | 1 | 1: 475 | 1: 480 |
| Kahramanmaraş-Pazarcık'ta Meydana Gelen Deprem Hk. 1 | Earthquake    | 1 | 1 | 1 | 1: 475 | 1: 480 |
| Kahramanmaraş-Pazarcık'ta Meydana Gelen Deprem Hk. 1 | Earthquake    | 1 | 1 | 1 | 1: 540 | 1: 545 |
| Kahramanmaraş-Pazarcık'ta Meydana Gelen Deprem Hk. 1 | Earthquake    | 1 | 1 | 1 | 1: 540 | 1: 545 |
| Kahramanmaraş-Pazarcık'ta Meydana Gelen Deprem Hk. 1 | Earthquake    | 1 | 1 | 1 | 1: 567 | 1: 572 |
| Kahramanmaraş-Pazarcık'ta Meydana Gelen Deprem Hk. 1 | Earthquake    | 1 | 1 | 1 | 1: 567 | 1: 572 |
| Kahramanmaraş-Pazarcık'ta Meydana Gelen Deprem Hk. 1 | Kahramanmaraş | 1 | 0 | 0 | 1: 575 | 1: 587 |
| Kahramanmaraş-Pazarcık'ta Meydana Gelen Deprem Hk. 1 | Pazarcık      | 0 | 1 | 0 | 1: 575 | 1: 587 |
| Kahramanmaraş-Pazarcık'ta Meydana Gelen Deprem Hk. 1 | Disaster      | 1 | 1 | 1 | 1: 730 | 1: 733 |
| Kahramanmaraş-Pazarcık'ta Meydana Gelen Deprem Hk. 1 | Disaster      | 1 | 1 | 1 | 1: 730 | 1: 733 |
| Kahramanmaraş-Pazarcık'ta Meydana Gelen Deprem Hk. 1 | AFAD          | 1 | 1 | 1 | 1: 793 | 1: 796 |
| Kahramanmaraş-Pazarcık'ta Meydana Gelen Deprem Hk. 1 | AFAD          | 1 | 1 | 1 | 1: 793 | 1: 796 |

|                                                      |                               |   |   |   |         |         |
|------------------------------------------------------|-------------------------------|---|---|---|---------|---------|
| Kahramanmaraş-Pazarcık'ta Meydana Gelen Deprem Hk. 1 | Disaster                      | 1 | 1 | 1 | 1: 813  | 1: 816  |
| Kahramanmaraş-Pazarcık'ta Meydana Gelen Deprem Hk. 1 | Disaster                      | 1 | 1 | 1 | 1: 813  | 1: 816  |
| Kahramanmaraş-Pazarcık'ta Meydana Gelen Deprem Hk. 1 | AFAD                          | 1 | 1 | 1 | 1: 849  | 1: 852  |
| Kahramanmaraş-Pazarcık'ta Meydana Gelen Deprem Hk. 1 | AFAD                          | 1 | 1 | 1 | 1: 849  | 1: 852  |
| Kahramanmaraş-Pazarcık'ta Meydana Gelen Deprem Hk. 1 | Disaster                      | 1 | 1 | 1 | 1: 1052 | 1: 1055 |
| Kahramanmaraş-Pazarcık'ta Meydana Gelen Deprem Hk. 1 | Disaster                      | 1 | 1 | 1 | 1: 1052 | 1: 1055 |
| Kahramanmaraş-Pazarcık'ta Meydana Gelen Deprem Hk. 1 | Coordination\Public relations | 1 | 1 | 1 | 1: 1101 | 1: 1106 |
| Kahramanmaraş-Pazarcık'ta Meydana Gelen Deprem Hk. 1 | Coordination\Public relations | 1 | 1 | 1 | 1: 1101 | 1: 1106 |
| Kahramanmaraş-Pazarcık'ta Meydana Gelen Deprem Hk. 1 | AFAD                          | 1 | 1 | 1 | 1: 1141 | 1: 1144 |
| Kahramanmaraş-Pazarcık'ta Meydana Gelen Deprem Hk. 1 | AFAD                          | 1 | 1 | 1 | 1: 1141 | 1: 1144 |
| Kahramanmaraş-Pazarcık'ta Meydana Gelen Deprem Hk. 1 | AFAD                          | 1 | 1 | 1 | 1: 1199 | 1: 1202 |
| Kahramanmaraş-Pazarcık'ta Meydana Gelen Deprem Hk. 1 | AFAD                          | 1 | 1 | 1 | 1: 1199 | 1: 1202 |
| Kahramanmaraş-Pazarcık'ta Meydana Gelen Deprem Hk. 1 | AFAD                          | 1 | 1 | 1 | 1: 1316 | 1: 1319 |
| Kahramanmaraş-Pazarcık'ta Meydana Gelen Deprem Hk. 1 | AFAD                          | 1 | 1 | 1 | 1: 1316 | 1: 1319 |
| Kahramanmaraş-Pazarcık'ta Meydana Gelen Deprem Hk. 1 | Response\Search&Rescue        | 1 | 1 | 1 | 1: 1410 | 1: 1423 |
| Kahramanmaraş-Pazarcık'ta Meydana Gelen Deprem Hk. 1 | Response\Search&Rescue        | 1 | 1 | 1 | 1: 1410 | 1: 1423 |
| Kahramanmaraş-Pazarcık'ta Meydana Gelen Deprem Hk. 1 | Disaster                      | 1 | 1 | 1 | 1: 1474 | 1: 1477 |
| Kahramanmaraş-Pazarcık'ta Meydana Gelen Deprem Hk. 1 | Disaster                      | 1 | 1 | 1 | 1: 1474 | 1: 1477 |
| Kahramanmaraş-Pazarcık'ta Meydana Gelen Deprem Hk. 1 | AFAD                          | 1 | 1 | 1 | 1: 1492 | 1: 1495 |
| Kahramanmaraş-Pazarcık'ta Meydana Gelen Deprem Hk. 1 | AFAD                          | 1 | 1 | 1 | 1: 1492 | 1: 1495 |

|                                                      |                                 |   |   |   |         |         |
|------------------------------------------------------|---------------------------------|---|---|---|---------|---------|
| Kahramanmaraş-Pazarcık'ta Meydana Gelen Deprem Hk. 1 | Preparedness\Preparedness       | 1 | 1 | 1 | 1: 1556 | 1: 1566 |
| Kahramanmaraş-Pazarcık'ta Meydana Gelen Deprem Hk. 1 | Preparedness\Preparedness       | 1 | 1 | 1 | 1: 1556 | 1: 1566 |
| Kahramanmaraş-Pazarcık'ta Meydana Gelen Deprem Hk. 1 | Disaster                        | 1 | 1 | 1 | 1: 1556 | 1: 1559 |
| Kahramanmaraş-Pazarcık'ta Meydana Gelen Deprem Hk. 1 | Disaster                        | 1 | 1 | 1 | 1: 1556 | 1: 1559 |
| Kahramanmaraş-Pazarcık'ta Meydana Gelen Deprem Hk. 1 | Disaster                        | 1 | 1 | 1 | 1: 1604 | 1: 1607 |
| Kahramanmaraş-Pazarcık'ta Meydana Gelen Deprem Hk. 1 | Disaster                        | 1 | 1 | 1 | 1: 1604 | 1: 1607 |
| Kahramanmaraş-Pazarcık'ta Meydana Gelen Deprem Hk. 1 | Recovery\Fund drive             | 1 | 1 | 1 | 1: 1665 | 1: 1683 |
| Kahramanmaraş-Pazarcık'ta Meydana Gelen Deprem Hk. 1 | Recovery\Fund drive             | 1 | 1 | 1 | 1: 1665 | 1: 1683 |
| Kahramanmaraş-Pazarcık'ta Meydana Gelen Deprem Hk. 1 | Kahramanmaraş                   | 1 | 0 | 0 | 2: 17   | 2: 29   |
| Kahramanmaraş-Pazarcık'ta Meydana Gelen Deprem Hk. 1 | Pazarcık                        | 0 | 1 | 0 | 2: 17   | 2: 29   |
| Kahramanmaraş-Pazarcık'ta Meydana Gelen Deprem Hk. 1 | Earthquake                      | 1 | 1 | 1 | 2: 57   | 2: 62   |
| Kahramanmaraş-Pazarcık'ta Meydana Gelen Deprem Hk. 1 | Earthquake                      | 1 | 1 | 1 | 2: 57   | 2: 62   |
| Kahramanmaraş-Pazarcık'ta Meydana Gelen Deprem Hk. 1 | AFAD                            | 1 | 1 | 1 | 2: 97   | 2: 100  |
| Kahramanmaraş-Pazarcık'ta Meydana Gelen Deprem Hk. 1 | AFAD                            | 1 | 1 | 1 | 2: 97   | 2: 100  |
| Kahramanmaraş-Pazarcık'ta Meydana Gelen Deprem Hk. 1 | Earthquake                      | 1 | 1 | 1 | 2: 148  | 2: 153  |
| Kahramanmaraş-Pazarcık'ta Meydana Gelen Deprem Hk. 1 | Earthquake                      | 1 | 1 | 1 | 2: 148  | 2: 153  |
| Kahramanmaraş-Pazarcık'ta Meydana Gelen Deprem Hk. 1 | Coordination\Social media       | 1 | 0 | 0 | 2: 229  | 2: 240  |
| Kahramanmaraş-Pazarcık'ta Meydana Gelen Deprem Hk. 1 | Coordination\Social media usage | 0 | 1 | 0 | 2: 229  | 2: 240  |
| Kahramanmaraş-Pazarcık'ta Meydana Gelen Deprem Hk. 1 | AFAD                            | 1 | 1 | 1 | 2: 285  | 2: 288  |
| Kahramanmaraş-Pazarcık'ta Meydana Gelen Deprem Hk. 1 | AFAD                            | 1 | 1 | 1 | 2: 285  | 2: 288  |

|                                                             |                                 |   |   |   |        |        |
|-------------------------------------------------------------|---------------------------------|---|---|---|--------|--------|
| Kahramanmaraş-<br>Pazarcık'ta Meydana<br>Gelen Deprem Hk. 1 | AFAD                            | 1 | 1 | 1 | 2: 307 | 2: 310 |
| Kahramanmaraş-<br>Pazarcık'ta Meydana<br>Gelen Deprem Hk. 1 | AFAD                            | 1 | 1 | 1 | 2: 307 | 2: 310 |
| Kahramanmaraş-<br>Pazarcık'ta Meydana<br>Gelen Deprem Hk. 1 | Coordination\Information        | 1 | 1 | 1 | 2: 352 | 2: 363 |
| Kahramanmaraş-<br>Pazarcık'ta Meydana<br>Gelen Deprem Hk. 1 | Coordination\Information        | 1 | 1 | 1 | 2: 352 | 2: 363 |
| Kahramanmaraş-<br>Pazarcık'ta Meydana<br>Gelen Deprem Hk. 1 | Recovery\Peacemaking            | 1 | 1 | 1 | 2: 368 | 2: 377 |
| Kahramanmaraş-<br>Pazarcık'ta Meydana<br>Gelen Deprem Hk. 1 | Recovery\Peacemaking            | 1 | 1 | 1 | 2: 368 | 2: 377 |
| Kahramanmaraş-<br>Pazarcık'ta Meydana<br>Gelen Deprem Hk. 1 | Coordination\Social media       | 1 | 0 | 0 | 2: 424 | 2: 435 |
| Kahramanmaraş-<br>Pazarcık'ta Meydana<br>Gelen Deprem Hk. 1 | Coordination\Social media usage | 0 | 1 | 0 | 2: 424 | 2: 435 |
| Kahramanmaraş-<br>Pazarcık'ta Meydana<br>Gelen Deprem Hk. 1 | Disaster                        | 1 | 1 | 1 | 2: 526 | 2: 529 |
| Kahramanmaraş-<br>Pazarcık'ta Meydana<br>Gelen Deprem Hk. 1 | Disaster                        | 1 | 1 | 1 | 2: 526 | 2: 529 |
| Kahramanmaraş-<br>Pazarcık'ta Meydana<br>Gelen Deprem Hk. 1 | Emergency                       | 1 | 1 | 1 | 2: 534 | 2: 543 |
| Kahramanmaraş-<br>Pazarcık'ta Meydana<br>Gelen Deprem Hk. 1 | Emergency                       | 1 | 1 | 1 | 2: 534 | 2: 543 |
| Kahramanmaraş-<br>Pazarcık'ta Meydana<br>Gelen Deprem Hk. 3 | Kahramanmaraş                   | 1 | 0 | 0 | 1: 17  | 1: 29  |
| Kahramanmaraş-<br>Pazarcık'ta Meydana<br>Gelen Deprem Hk. 3 | Pazarcık                        | 0 | 1 | 0 | 1: 17  | 1: 29  |
| Kahramanmaraş-<br>Pazarcık'ta Meydana<br>Gelen Deprem Hk. 3 | Earthquake                      | 1 | 1 | 1 | 1: 57  | 1: 62  |
| Kahramanmaraş-<br>Pazarcık'ta Meydana<br>Gelen Deprem Hk. 3 | Earthquake                      | 1 | 1 | 1 | 1: 57  | 1: 62  |
| Kahramanmaraş-<br>Pazarcık'ta Meydana<br>Gelen Deprem Hk. 3 | AFAD                            | 1 | 1 | 1 | 1: 97  | 1: 100 |
| Kahramanmaraş-<br>Pazarcık'ta Meydana<br>Gelen Deprem Hk. 3 | AFAD                            | 1 | 1 | 1 | 1: 97  | 1: 100 |
| Kahramanmaraş-<br>Pazarcık'ta Meydana<br>Gelen Deprem Hk. 3 | Earthquake                      | 1 | 1 | 1 | 1: 148 | 1: 153 |
| Kahramanmaraş-<br>Pazarcık'ta Meydana<br>Gelen Deprem Hk. 3 | Earthquake                      | 1 | 1 | 1 | 1: 148 | 1: 153 |

|                                                      |               |   |   |   |        |        |
|------------------------------------------------------|---------------|---|---|---|--------|--------|
| Kahramanmaraş-Pazarcık'ta Meydana Gelen Deprem Hk. 3 | Kahramanmaraş | 1 | 0 | 0 | 1: 180 | 1: 192 |
| Kahramanmaraş-Pazarcık'ta Meydana Gelen Deprem Hk. 3 | Pazarcık      | 0 | 1 | 0 | 1: 180 | 1: 192 |
| Kahramanmaraş-Pazarcık'ta Meydana Gelen Deprem Hk. 3 | Earthquake    | 1 | 1 | 1 | 1: 220 | 1: 225 |
| Kahramanmaraş-Pazarcık'ta Meydana Gelen Deprem Hk. 3 | Earthquake    | 1 | 1 | 1 | 1: 220 | 1: 225 |
| Kahramanmaraş-Pazarcık'ta Meydana Gelen Deprem Hk. 3 | Kahramanmaraş | 1 | 0 | 0 | 1: 298 | 1: 310 |
| Kahramanmaraş-Pazarcık'ta Meydana Gelen Deprem Hk. 3 | Pazarcık      | 0 | 1 | 0 | 1: 298 | 1: 310 |
| Kahramanmaraş-Pazarcık'ta Meydana Gelen Deprem Hk. 3 | Earthquake    | 1 | 1 | 1 | 1: 338 | 1: 343 |
| Kahramanmaraş-Pazarcık'ta Meydana Gelen Deprem Hk. 3 | Earthquake    | 1 | 1 | 1 | 1: 338 | 1: 343 |
| Kahramanmaraş-Pazarcık'ta Meydana Gelen Deprem Hk. 3 | Kahramanmaraş | 1 | 0 | 0 | 1: 379 | 1: 391 |
| Kahramanmaraş-Pazarcık'ta Meydana Gelen Deprem Hk. 3 | Pazarcık      | 0 | 1 | 0 | 1: 379 | 1: 391 |
| Kahramanmaraş-Pazarcık'ta Meydana Gelen Deprem Hk. 3 | Earthquake    | 1 | 1 | 1 | 1: 473 | 1: 478 |
| Kahramanmaraş-Pazarcık'ta Meydana Gelen Deprem Hk. 3 | Earthquake    | 1 | 1 | 1 | 1: 473 | 1: 478 |
| Kahramanmaraş-Pazarcık'ta Meydana Gelen Deprem Hk. 3 | Earthquake    | 1 | 1 | 1 | 1: 500 | 1: 505 |
| Kahramanmaraş-Pazarcık'ta Meydana Gelen Deprem Hk. 3 | Earthquake    | 1 | 1 | 1 | 1: 500 | 1: 505 |
| Kahramanmaraş-Pazarcık'ta Meydana Gelen Deprem Hk. 3 | Earthquake    | 1 | 1 | 1 | 1: 580 | 1: 585 |
| Kahramanmaraş-Pazarcık'ta Meydana Gelen Deprem Hk. 3 | Earthquake    | 1 | 1 | 1 | 1: 580 | 1: 585 |
| Kahramanmaraş-Pazarcık'ta Meydana Gelen Deprem Hk. 3 | Earthquake    | 1 | 1 | 1 | 1: 607 | 1: 612 |
| Kahramanmaraş-Pazarcık'ta Meydana Gelen Deprem Hk. 3 | Earthquake    | 1 | 1 | 1 | 1: 607 | 1: 612 |
| Kahramanmaraş-Pazarcık'ta Meydana Gelen Deprem Hk. 3 | Kahramanmaraş | 1 | 0 | 0 | 1: 615 | 1: 627 |
| Kahramanmaraş-Pazarcık'ta Meydana Gelen Deprem Hk. 3 | Pazarcık      | 0 | 1 | 0 | 1: 615 | 1: 627 |

|                                                             |                           |   |   |   |         |         |
|-------------------------------------------------------------|---------------------------|---|---|---|---------|---------|
| Kahramanmaraş-<br>Pazarcık'ta Meydana<br>Gelen Deprem Hk. 3 | Kahramanmaraş             | 1 | 0 | 0 | 1: 822  | 1: 834  |
| Kahramanmaraş-<br>Pazarcık'ta Meydana<br>Gelen Deprem Hk. 3 | Pazarcık                  | 0 | 1 | 0 | 1: 822  | 1: 834  |
| Kahramanmaraş-<br>Pazarcık'ta Meydana<br>Gelen Deprem Hk. 3 | Kahramanmaraş             | 1 | 0 | 0 | 1: 938  | 1: 950  |
| Kahramanmaraş-<br>Pazarcık'ta Meydana<br>Gelen Deprem Hk. 3 | Pazarcık                  | 0 | 1 | 0 | 1: 938  | 1: 950  |
| Kahramanmaraş-<br>Pazarcık'ta Meydana<br>Gelen Deprem Hk. 3 | Disaster                  | 1 | 1 | 1 | 1: 1085 | 1: 1088 |
| Kahramanmaraş-<br>Pazarcık'ta Meydana<br>Gelen Deprem Hk. 3 | Disaster                  | 1 | 1 | 1 | 1: 1085 | 1: 1088 |
| Kahramanmaraş-<br>Pazarcık'ta Meydana<br>Gelen Deprem Hk. 3 | Earthquake                | 1 | 1 | 1 | 1: 1116 | 1: 1121 |
| Kahramanmaraş-<br>Pazarcık'ta Meydana<br>Gelen Deprem Hk. 3 | Earthquake                | 1 | 1 | 1 | 1: 1116 | 1: 1121 |
| Kahramanmaraş-<br>Pazarcık'ta Meydana<br>Gelen Deprem Hk. 3 | AFAD                      | 1 | 1 | 1 | 1: 1194 | 1: 1197 |
| Kahramanmaraş-<br>Pazarcık'ta Meydana<br>Gelen Deprem Hk. 3 | AFAD                      | 1 | 1 | 1 | 1: 1194 | 1: 1197 |
| Kahramanmaraş-<br>Pazarcık'ta Meydana<br>Gelen Deprem Hk. 3 | Disaster                  | 1 | 1 | 1 | 1: 1214 | 1: 1217 |
| Kahramanmaraş-<br>Pazarcık'ta Meydana<br>Gelen Deprem Hk. 3 | Disaster                  | 1 | 1 | 1 | 1: 1214 | 1: 1217 |
| Kahramanmaraş-<br>Pazarcık'ta Meydana<br>Gelen Deprem Hk. 3 | Coordination\Coordination | 1 | 1 | 1 | 1: 1394 | 1: 1405 |
| Kahramanmaraş-<br>Pazarcık'ta Meydana<br>Gelen Deprem Hk. 3 | Coordination\Coordination | 1 | 1 | 1 | 1: 1394 | 1: 1405 |
| Kahramanmaraş-<br>Pazarcık'ta Meydana<br>Gelen Deprem Hk. 3 | Kahramanmaraş             | 1 | 0 | 0 | 1: 1431 | 1: 1443 |
| Kahramanmaraş-<br>Pazarcık'ta Meydana<br>Gelen Deprem Hk. 3 | Pazarcık                  | 0 | 1 | 0 | 1: 1431 | 1: 1443 |
| Kahramanmaraş-<br>Pazarcık'ta Meydana<br>Gelen Deprem Hk. 3 | AFAD                      | 1 | 1 | 1 | 1: 1736 | 1: 1739 |
| Kahramanmaraş-<br>Pazarcık'ta Meydana<br>Gelen Deprem Hk. 3 | AFAD                      | 1 | 1 | 1 | 1: 1736 | 1: 1739 |
| Kahramanmaraş-<br>Pazarcık'ta Meydana<br>Gelen Deprem Hk. 3 | Disaster                  | 1 | 1 | 1 | 1: 2038 | 1: 2041 |
| Kahramanmaraş-<br>Pazarcık'ta Meydana<br>Gelen Deprem Hk. 3 | Disaster                  | 1 | 1 | 1 | 1: 2038 | 1: 2041 |

|                                                      |                               |   |   |   |         |         |
|------------------------------------------------------|-------------------------------|---|---|---|---------|---------|
| Kahramanmaraş-Pazarcık'ta Meydana Gelen Deprem Hk. 3 | Coordination\Public relations | 1 | 1 | 1 | 1: 2197 | 1: 2202 |
| Kahramanmaraş-Pazarcık'ta Meydana Gelen Deprem Hk. 3 | Coordination\Public relations | 1 | 1 | 1 | 1: 2197 | 1: 2202 |
| Kahramanmaraş-Pazarcık'ta Meydana Gelen Deprem Hk. 3 | AFAD                          | 1 | 1 | 1 | 1: 2237 | 1: 2240 |
| Kahramanmaraş-Pazarcık'ta Meydana Gelen Deprem Hk. 3 | AFAD                          | 1 | 1 | 1 | 1: 2237 | 1: 2240 |
| Kahramanmaraş-Pazarcık'ta Meydana Gelen Deprem Hk. 3 | Response\Search&Rescue        | 1 | 1 | 1 | 1: 2379 | 1: 2392 |
| Kahramanmaraş-Pazarcık'ta Meydana Gelen Deprem Hk. 3 | Response\Search&Rescue        | 1 | 1 | 1 | 1: 2379 | 1: 2392 |
| Kahramanmaraş-Pazarcık'ta Meydana Gelen Deprem Hk. 3 | Disaster                      | 1 | 1 | 1 | 1: 2443 | 1: 2446 |
| Kahramanmaraş-Pazarcık'ta Meydana Gelen Deprem Hk. 3 | Disaster                      | 1 | 1 | 1 | 1: 2443 | 1: 2446 |
| Kahramanmaraş-Pazarcık'ta Meydana Gelen Deprem Hk. 3 | AFAD                          | 1 | 1 | 1 | 1: 2461 | 1: 2464 |
| Kahramanmaraş-Pazarcık'ta Meydana Gelen Deprem Hk. 3 | AFAD                          | 1 | 1 | 1 | 1: 2461 | 1: 2464 |
| Kahramanmaraş-Pazarcık'ta Meydana Gelen Deprem Hk. 3 | Recovery\Fund drive           | 1 | 1 | 1 | 1: 2521 | 1: 2539 |
| Kahramanmaraş-Pazarcık'ta Meydana Gelen Deprem Hk. 3 | Recovery\Fund drive           | 1 | 1 | 1 | 1: 2521 | 1: 2539 |
| Kahramanmaraş-Pazarcık'ta Meydana Gelen Deprem Hk. 3 | Kahramanmaraş                 | 1 | 0 | 0 | 2: 17   | 2: 29   |
| Kahramanmaraş-Pazarcık'ta Meydana Gelen Deprem Hk. 3 | Pazarcık                      | 0 | 1 | 0 | 2: 17   | 2: 29   |
| Kahramanmaraş-Pazarcık'ta Meydana Gelen Deprem Hk. 3 | Earthquake                    | 1 | 1 | 1 | 2: 57   | 2: 62   |
| Kahramanmaraş-Pazarcık'ta Meydana Gelen Deprem Hk. 3 | Earthquake                    | 1 | 1 | 1 | 2: 57   | 2: 62   |
| Kahramanmaraş-Pazarcık'ta Meydana Gelen Deprem Hk. 3 | AFAD                          | 1 | 1 | 1 | 2: 97   | 2: 100  |
| Kahramanmaraş-Pazarcık'ta Meydana Gelen Deprem Hk. 3 | AFAD                          | 1 | 1 | 1 | 2: 97   | 2: 100  |
| Kahramanmaraş-Pazarcık'ta Meydana Gelen Deprem Hk. 3 | Earthquake                    | 1 | 1 | 1 | 2: 148  | 2: 153  |
| Kahramanmaraş-Pazarcık'ta Meydana Gelen Deprem Hk. 3 | Earthquake                    | 1 | 1 | 1 | 2: 148  | 2: 153  |

|                                                      |                                 |   |   |   |        |        |
|------------------------------------------------------|---------------------------------|---|---|---|--------|--------|
| Kahramanmaraş-Pazarcık'ta Meydana Gelen Deprem Hk. 3 | AFAD                            | 1 | 1 | 1 | 2: 180 | 2: 183 |
| Kahramanmaraş-Pazarcık'ta Meydana Gelen Deprem Hk. 3 | AFAD                            | 1 | 1 | 1 | 2: 180 | 2: 183 |
| Kahramanmaraş-Pazarcık'ta Meydana Gelen Deprem Hk. 3 | AFAD                            | 1 | 1 | 1 | 2: 297 | 2: 300 |
| Kahramanmaraş-Pazarcık'ta Meydana Gelen Deprem Hk. 3 | AFAD                            | 1 | 1 | 1 | 2: 297 | 2: 300 |
| Kahramanmaraş-Pazarcık'ta Meydana Gelen Deprem Hk. 3 | Preparedness\Preparedness       | 1 | 1 | 1 | 2: 340 | 2: 350 |
| Kahramanmaraş-Pazarcık'ta Meydana Gelen Deprem Hk. 3 | Preparedness\Preparedness       | 1 | 1 | 1 | 2: 340 | 2: 350 |
| Kahramanmaraş-Pazarcık'ta Meydana Gelen Deprem Hk. 3 | Disaster                        | 1 | 1 | 1 | 2: 340 | 2: 343 |
| Kahramanmaraş-Pazarcık'ta Meydana Gelen Deprem Hk. 3 | Disaster                        | 1 | 1 | 1 | 2: 340 | 2: 343 |
| Kahramanmaraş-Pazarcık'ta Meydana Gelen Deprem Hk. 3 | Disaster                        | 1 | 1 | 1 | 2: 388 | 2: 391 |
| Kahramanmaraş-Pazarcık'ta Meydana Gelen Deprem Hk. 3 | Disaster                        | 1 | 1 | 1 | 2: 388 | 2: 391 |
| Kahramanmaraş-Pazarcık'ta Meydana Gelen Deprem Hk. 3 | Coordination\Social media       | 1 | 0 | 0 | 2: 496 | 2: 507 |
| Kahramanmaraş-Pazarcık'ta Meydana Gelen Deprem Hk. 3 | Coordination\Social media usage | 0 | 1 | 0 | 2: 496 | 2: 507 |
| Kahramanmaraş-Pazarcık'ta Meydana Gelen Deprem Hk. 3 | AFAD                            | 1 | 1 | 1 | 2: 552 | 2: 555 |
| Kahramanmaraş-Pazarcık'ta Meydana Gelen Deprem Hk. 3 | AFAD                            | 1 | 1 | 1 | 2: 552 | 2: 555 |
| Kahramanmaraş-Pazarcık'ta Meydana Gelen Deprem Hk. 3 | AFAD                            | 1 | 1 | 1 | 2: 574 | 2: 577 |
| Kahramanmaraş-Pazarcık'ta Meydana Gelen Deprem Hk. 3 | AFAD                            | 1 | 1 | 1 | 2: 574 | 2: 577 |
| Kahramanmaraş-Pazarcık'ta Meydana Gelen Deprem Hk. 3 | Coordination\Information        | 1 | 1 | 1 | 2: 619 | 2: 630 |
| Kahramanmaraş-Pazarcık'ta Meydana Gelen Deprem Hk. 3 | Coordination\Information        | 1 | 1 | 1 | 2: 619 | 2: 630 |
| Kahramanmaraş-Pazarcık'ta Meydana Gelen Deprem Hk. 3 | Recovery\Peacemaking            | 1 | 1 | 1 | 2: 635 | 2: 644 |
| Kahramanmaraş-Pazarcık'ta Meydana Gelen Deprem Hk. 3 | Recovery\Peacemaking            | 1 | 1 | 1 | 2: 635 | 2: 644 |



|                                                      |                                 |   |   |   |        |        |
|------------------------------------------------------|---------------------------------|---|---|---|--------|--------|
| Kahramanmaraş-Pazarcık'ta Meydana Gelen Deprem Hk. 3 | Coordination\Social media       | 1 | 0 | 0 | 2: 691 | 2: 702 |
| Kahramanmaraş-Pazarcık'ta Meydana Gelen Deprem Hk. 3 | Coordination\Social media usage | 0 | 1 | 0 | 2: 691 | 2: 702 |
| Kahramanmaraş-Pazarcık'ta Meydana Gelen Deprem Hk. 3 | Disaster                        | 1 | 1 | 1 | 2: 793 | 2: 796 |
| Kahramanmaraş-Pazarcık'ta Meydana Gelen Deprem Hk. 3 | Disaster                        | 1 | 1 | 1 | 2: 793 | 2: 796 |
| Kahramanmaraş-Pazarcık'ta Meydana Gelen Deprem Hk. 3 | Emergency                       | 1 | 1 | 1 | 2: 801 | 2: 810 |
| Kahramanmaraş-Pazarcık'ta Meydana Gelen Deprem Hk. 3 | Emergency                       | 1 | 1 | 1 | 2: 801 | 2: 810 |
| Kahramanmaraş-Pazarcık'ta Meydana Gelen Deprem Hk. 4 | Kahramanmaraş                   | 1 | 0 | 0 | 1: 17  | 1: 29  |
| Kahramanmaraş-Pazarcık'ta Meydana Gelen Deprem Hk. 4 | Pazarcık                        | 0 | 1 | 0 | 1: 17  | 1: 29  |
| Kahramanmaraş-Pazarcık'ta Meydana Gelen Deprem Hk. 4 | Earthquake                      | 1 | 1 | 1 | 1: 57  | 1: 62  |
| Kahramanmaraş-Pazarcık'ta Meydana Gelen Deprem Hk. 4 | Earthquake                      | 1 | 1 | 1 | 1: 57  | 1: 62  |
| Kahramanmaraş-Pazarcık'ta Meydana Gelen Deprem Hk. 4 | AFAD                            | 1 | 1 | 1 | 1: 97  | 1: 100 |
| Kahramanmaraş-Pazarcık'ta Meydana Gelen Deprem Hk. 4 | AFAD                            | 1 | 1 | 1 | 1: 97  | 1: 100 |
| Kahramanmaraş-Pazarcık'ta Meydana Gelen Deprem Hk. 4 | Earthquake                      | 1 | 1 | 1 | 1: 148 | 1: 153 |
| Kahramanmaraş-Pazarcık'ta Meydana Gelen Deprem Hk. 4 | Earthquake                      | 1 | 1 | 1 | 1: 148 | 1: 153 |
| Kahramanmaraş-Pazarcık'ta Meydana Gelen Deprem Hk. 4 | Kahramanmaraş                   | 1 | 0 | 0 | 1: 178 | 1: 190 |
| Kahramanmaraş-Pazarcık'ta Meydana Gelen Deprem Hk. 4 | Pazarcık                        | 0 | 1 | 0 | 1: 178 | 1: 190 |
| Kahramanmaraş-Pazarcık'ta Meydana Gelen Deprem Hk. 4 | Earthquake                      | 1 | 1 | 1 | 1: 218 | 1: 223 |
| Kahramanmaraş-Pazarcık'ta Meydana Gelen Deprem Hk. 4 | Earthquake                      | 1 | 1 | 1 | 1: 218 | 1: 223 |
| Kahramanmaraş-Pazarcık'ta Meydana Gelen Deprem Hk. 4 | Kahramanmaraş                   | 1 | 0 | 0 | 1: 296 | 1: 308 |
| Kahramanmaraş-Pazarcık'ta Meydana Gelen Deprem Hk. 4 | Pazarcık                        | 0 | 1 | 0 | 1: 296 | 1: 308 |

|                                                      |               |   |   |   |         |         |
|------------------------------------------------------|---------------|---|---|---|---------|---------|
| Kahramanmaraş-Pazarcık'ta Meydana Gelen Deprem Hk. 4 | Earthquake    | 1 | 1 | 1 | 1: 336  | 1: 341  |
| Kahramanmaraş-Pazarcık'ta Meydana Gelen Deprem Hk. 4 | Earthquake    | 1 | 1 | 1 | 1: 336  | 1: 341  |
| Kahramanmaraş-Pazarcık'ta Meydana Gelen Deprem Hk. 4 | Kahramanmaraş | 1 | 0 | 0 | 1: 377  | 1: 389  |
| Kahramanmaraş-Pazarcık'ta Meydana Gelen Deprem Hk. 4 | Pazarcık      | 0 | 1 | 0 | 1: 377  | 1: 389  |
| Kahramanmaraş-Pazarcık'ta Meydana Gelen Deprem Hk. 4 | Earthquake    | 1 | 1 | 1 | 1: 471  | 1: 476  |
| Kahramanmaraş-Pazarcık'ta Meydana Gelen Deprem Hk. 4 | Earthquake    | 1 | 1 | 1 | 1: 471  | 1: 476  |
| Kahramanmaraş-Pazarcık'ta Meydana Gelen Deprem Hk. 4 | Earthquake    | 1 | 1 | 1 | 1: 498  | 1: 503  |
| Kahramanmaraş-Pazarcık'ta Meydana Gelen Deprem Hk. 4 | Earthquake    | 1 | 1 | 1 | 1: 498  | 1: 503  |
| Kahramanmaraş-Pazarcık'ta Meydana Gelen Deprem Hk. 4 | Earthquake    | 1 | 1 | 1 | 1: 578  | 1: 583  |
| Kahramanmaraş-Pazarcık'ta Meydana Gelen Deprem Hk. 4 | Earthquake    | 1 | 1 | 1 | 1: 578  | 1: 583  |
| Kahramanmaraş-Pazarcık'ta Meydana Gelen Deprem Hk. 4 | Earthquake    | 1 | 1 | 1 | 1: 605  | 1: 610  |
| Kahramanmaraş-Pazarcık'ta Meydana Gelen Deprem Hk. 4 | Earthquake    | 1 | 1 | 1 | 1: 605  | 1: 610  |
| Kahramanmaraş-Pazarcık'ta Meydana Gelen Deprem Hk. 4 | Kahramanmaraş | 1 | 0 | 0 | 1: 613  | 1: 625  |
| Kahramanmaraş-Pazarcık'ta Meydana Gelen Deprem Hk. 4 | Pazarcık      | 0 | 1 | 0 | 1: 613  | 1: 625  |
| Kahramanmaraş-Pazarcık'ta Meydana Gelen Deprem Hk. 4 | Kahramanmaraş | 1 | 0 | 0 | 1: 820  | 1: 832  |
| Kahramanmaraş-Pazarcık'ta Meydana Gelen Deprem Hk. 4 | Pazarcık      | 0 | 1 | 0 | 1: 820  | 1: 832  |
| Kahramanmaraş-Pazarcık'ta Meydana Gelen Deprem Hk. 4 | Kahramanmaraş | 1 | 0 | 0 | 1: 1036 | 1: 1048 |
| Kahramanmaraş-Pazarcık'ta Meydana Gelen Deprem Hk. 4 | Pazarcık      | 0 | 1 | 0 | 1: 1036 | 1: 1048 |
| Kahramanmaraş-Pazarcık'ta Meydana Gelen Deprem Hk. 4 | Disaster      | 1 | 1 | 1 | 1: 1183 | 1: 1186 |
| Kahramanmaraş-Pazarcık'ta Meydana Gelen Deprem Hk. 4 | Disaster      | 1 | 1 | 1 | 1: 1183 | 1: 1186 |

|                                                      |                           |   |   |   |         |         |
|------------------------------------------------------|---------------------------|---|---|---|---------|---------|
| Kahramanmaraş-Pazarcık'ta Meydana Gelen Deprem Hk. 4 | Earthquake                | 1 | 1 | 1 | 1: 1214 | 1: 1219 |
| Kahramanmaraş-Pazarcık'ta Meydana Gelen Deprem Hk. 4 | Earthquake                | 1 | 1 | 1 | 1: 1214 | 1: 1219 |
| Kahramanmaraş-Pazarcık'ta Meydana Gelen Deprem Hk. 4 | AFAD                      | 1 | 1 | 1 | 1: 1292 | 1: 1295 |
| Kahramanmaraş-Pazarcık'ta Meydana Gelen Deprem Hk. 4 | AFAD                      | 1 | 1 | 1 | 1: 1292 | 1: 1295 |
| Kahramanmaraş-Pazarcık'ta Meydana Gelen Deprem Hk. 4 | Disaster                  | 1 | 1 | 1 | 1: 1312 | 1: 1315 |
| Kahramanmaraş-Pazarcık'ta Meydana Gelen Deprem Hk. 4 | Disaster                  | 1 | 1 | 1 | 1: 1312 | 1: 1315 |
| Kahramanmaraş-Pazarcık'ta Meydana Gelen Deprem Hk. 4 | Response\Search&Rescue    | 1 | 1 | 1 | 1: 1537 | 1: 1550 |
| Kahramanmaraş-Pazarcık'ta Meydana Gelen Deprem Hk. 4 | Response\Search&Rescue    | 1 | 1 | 1 | 1: 1537 | 1: 1550 |
| Kahramanmaraş-Pazarcık'ta Meydana Gelen Deprem Hk. 4 | Coordination\Coordination | 1 | 1 | 1 | 1: 1634 | 1: 1645 |
| Kahramanmaraş-Pazarcık'ta Meydana Gelen Deprem Hk. 4 | Coordination\Coordination | 1 | 1 | 1 | 1: 1634 | 1: 1645 |
| Kahramanmaraş-Pazarcık'ta Meydana Gelen Deprem Hk. 4 | Kahramanmaraş             | 1 | 0 | 0 | 1: 1671 | 1: 1683 |
| Kahramanmaraş-Pazarcık'ta Meydana Gelen Deprem Hk. 4 | Pazarcık                  | 0 | 1 | 0 | 1: 1671 | 1: 1683 |
| Kahramanmaraş-Pazarcık'ta Meydana Gelen Deprem Hk. 4 | AFAD                      | 1 | 1 | 1 | 1: 1976 | 1: 1979 |
| Kahramanmaraş-Pazarcık'ta Meydana Gelen Deprem Hk. 4 | AFAD                      | 1 | 1 | 1 | 1: 1976 | 1: 1979 |
| Kahramanmaraş-Pazarcık'ta Meydana Gelen Deprem Hk. 4 | Disaster                  | 1 | 1 | 1 | 1: 2094 | 1: 2097 |
| Kahramanmaraş-Pazarcık'ta Meydana Gelen Deprem Hk. 4 | Disaster                  | 1 | 1 | 1 | 1: 2094 | 1: 2097 |
| Kahramanmaraş-Pazarcık'ta Meydana Gelen Deprem Hk. 4 | Disaster                  | 1 | 1 | 1 | 1: 2113 | 1: 2116 |
| Kahramanmaraş-Pazarcık'ta Meydana Gelen Deprem Hk. 4 | Disaster                  | 1 | 1 | 1 | 1: 2113 | 1: 2116 |
| Kahramanmaraş-Pazarcık'ta Meydana Gelen Deprem Hk. 4 | Kahramanmaraş             | 1 | 0 | 0 | 1: 2449 | 1: 2461 |
| Kahramanmaraş-Pazarcık'ta Meydana Gelen Deprem Hk. 4 | Pazarcık                  | 0 | 1 | 0 | 1: 2449 | 1: 2461 |

|                                                             |                            |   |   |   |         |         |
|-------------------------------------------------------------|----------------------------|---|---|---|---------|---------|
| Kahramanmaraş-<br>Pazarcık'ta Meydana<br>Gelen Deprem Hk. 4 | Disaster                   | 1 | 1 | 1 | 1: 2557 | 1: 2560 |
| Kahramanmaraş-<br>Pazarcık'ta Meydana<br>Gelen Deprem Hk. 4 | Disaster                   | 1 | 1 | 1 | 1: 2557 | 1: 2560 |
| Kahramanmaraş-<br>Pazarcık'ta Meydana<br>Gelen Deprem Hk. 4 | Kahramanmaraş              | 1 | 0 | 0 | 1: 2580 | 1: 2592 |
| Kahramanmaraş-<br>Pazarcık'ta Meydana<br>Gelen Deprem Hk. 4 | Pazarcık                   | 0 | 1 | 0 | 1: 2580 | 1: 2592 |
| Kahramanmaraş-<br>Pazarcık'ta Meydana<br>Gelen Deprem Hk. 4 | Earthquake                 | 1 | 1 | 1 | 1: 2718 | 1: 2723 |
| Kahramanmaraş-<br>Pazarcık'ta Meydana<br>Gelen Deprem Hk. 4 | Earthquake                 | 1 | 1 | 1 | 1: 2718 | 1: 2723 |
| Kahramanmaraş-<br>Pazarcık'ta Meydana<br>Gelen Deprem Hk. 4 | Coordination\Communication | 1 | 1 | 1 | 1: 3017 | 1: 3024 |
| Kahramanmaraş-<br>Pazarcık'ta Meydana<br>Gelen Deprem Hk. 4 | Coordination\Communication | 1 | 1 | 1 | 1: 3017 | 1: 3024 |
| Kahramanmaraş-<br>Pazarcık'ta Meydana<br>Gelen Deprem Hk. 4 | Disaster                   | 1 | 1 | 1 | 1: 3058 | 1: 3061 |
| Kahramanmaraş-<br>Pazarcık'ta Meydana<br>Gelen Deprem Hk. 4 | Disaster                   | 1 | 1 | 1 | 1: 3058 | 1: 3061 |
| Kahramanmaraş-<br>Pazarcık'ta Meydana<br>Gelen Deprem Hk. 4 | Kahramanmaraş              | 1 | 0 | 0 | 2: 17   | 2: 29   |
| Kahramanmaraş-<br>Pazarcık'ta Meydana<br>Gelen Deprem Hk. 4 | Pazarcık                   | 0 | 1 | 0 | 2: 17   | 2: 29   |
| Kahramanmaraş-<br>Pazarcık'ta Meydana<br>Gelen Deprem Hk. 4 | Earthquake                 | 1 | 1 | 1 | 2: 57   | 2: 62   |
| Kahramanmaraş-<br>Pazarcık'ta Meydana<br>Gelen Deprem Hk. 4 | Earthquake                 | 1 | 1 | 1 | 2: 57   | 2: 62   |
| Kahramanmaraş-<br>Pazarcık'ta Meydana<br>Gelen Deprem Hk. 4 | AFAD                       | 1 | 1 | 1 | 2: 97   | 2: 100  |
| Kahramanmaraş-<br>Pazarcık'ta Meydana<br>Gelen Deprem Hk. 4 | AFAD                       | 1 | 1 | 1 | 2: 97   | 2: 100  |
| Kahramanmaraş-<br>Pazarcık'ta Meydana<br>Gelen Deprem Hk. 4 | Earthquake                 | 1 | 1 | 1 | 2: 148  | 2: 153  |
| Kahramanmaraş-<br>Pazarcık'ta Meydana<br>Gelen Deprem Hk. 4 | Earthquake                 | 1 | 1 | 1 | 2: 148  | 2: 153  |
| Kahramanmaraş-<br>Pazarcık'ta Meydana<br>Gelen Deprem Hk. 4 | Disaster                   | 1 | 1 | 1 | 2: 356  | 2: 359  |
| Kahramanmaraş-<br>Pazarcık'ta Meydana<br>Gelen Deprem Hk. 4 | Disaster                   | 1 | 1 | 1 | 2: 356  | 2: 359  |

|                                                      |                             |   |   |   |        |        |
|------------------------------------------------------|-----------------------------|---|---|---|--------|--------|
| Kahramanmaraş-Pazarcık'ta Meydana Gelen Deprem Hk. 4 | Response\Number of staff    | 1 | 0 | 0 | 2: 406 | 2: 428 |
| Kahramanmaraş-Pazarcık'ta Meydana Gelen Deprem Hk. 4 | Response\Search&Rescue      | 1 | 1 | 1 | 2: 406 | 2: 419 |
| Kahramanmaraş-Pazarcık'ta Meydana Gelen Deprem Hk. 4 | Response\Search&Rescue      | 1 | 1 | 1 | 2: 406 | 2: 419 |
| Kahramanmaraş-Pazarcık'ta Meydana Gelen Deprem Hk. 4 | Response\Number             | 0 | 1 | 0 | 2: 406 | 2: 428 |
| Kahramanmaraş-Pazarcık'ta Meydana Gelen Deprem Hk. 4 | Shelter&meal\Mobile kitchen | 1 | 1 | 1 | 2: 538 | 2: 549 |
| Kahramanmaraş-Pazarcık'ta Meydana Gelen Deprem Hk. 4 | Shelter&meal\Mobile kitchen | 1 | 1 | 1 | 2: 538 | 2: 549 |
| Kahramanmaraş-Pazarcık'ta Meydana Gelen Deprem Hk. 4 | Shelter&meal\Mobile bakery  | 1 | 1 | 1 | 2: 556 | 2: 566 |
| Kahramanmaraş-Pazarcık'ta Meydana Gelen Deprem Hk. 4 | Shelter&meal\Mobile bakery  | 1 | 1 | 1 | 2: 556 | 2: 566 |
| Kahramanmaraş-Pazarcık'ta Meydana Gelen Deprem Hk. 4 | Kahramanmaraş               | 1 | 0 | 0 | 2: 568 | 2: 580 |
| Kahramanmaraş-Pazarcık'ta Meydana Gelen Deprem Hk. 4 | Pazarcık                    | 0 | 1 | 0 | 2: 568 | 2: 580 |
| Kahramanmaraş-Pazarcık'ta Meydana Gelen Deprem Hk. 4 | Response\Military           | 1 | 1 | 1 | 2: 607 | 2: 614 |
| Kahramanmaraş-Pazarcık'ta Meydana Gelen Deprem Hk. 4 | Response\Military           | 1 | 1 | 1 | 2: 607 | 2: 614 |
| Kahramanmaraş-Pazarcık'ta Meydana Gelen Deprem Hk. 4 | Shelter&meal\Mobile kitchen | 1 | 1 | 1 | 2: 701 | 2: 712 |
| Kahramanmaraş-Pazarcık'ta Meydana Gelen Deprem Hk. 4 | Shelter&meal\Mobile kitchen | 1 | 1 | 1 | 2: 701 | 2: 712 |
| Kahramanmaraş-Pazarcık'ta Meydana Gelen Deprem Hk. 4 | Shelter&meal\Mobile bakery  | 1 | 1 | 1 | 2: 724 | 2: 734 |
| Kahramanmaraş-Pazarcık'ta Meydana Gelen Deprem Hk. 4 | Shelter&meal\Mobile bakery  | 1 | 1 | 1 | 2: 724 | 2: 734 |
| Kahramanmaraş-Pazarcık'ta Meydana Gelen Deprem Hk. 4 | Kahramanmaraş               | 1 | 0 | 0 | 2: 737 | 2: 749 |
| Kahramanmaraş-Pazarcık'ta Meydana Gelen Deprem Hk. 4 | Pazarcık                    | 0 | 1 | 0 | 2: 737 | 2: 749 |
| Kahramanmaraş-Pazarcık'ta Meydana Gelen Deprem Hk. 4 | Kahramanmaraş               | 1 | 0 | 0 | 2: 839 | 2: 851 |
| Kahramanmaraş-Pazarcık'ta Meydana Gelen Deprem Hk. 4 | Pazarcık                    | 0 | 1 | 0 | 2: 839 | 2: 851 |

|                                                      |                             |   |   |   |         |         |
|------------------------------------------------------|-----------------------------|---|---|---|---------|---------|
| Kahramanmaraş-Pazarcık'ta Meydana Gelen Deprem Hk. 4 | Disaster                    | 1 | 1 | 1 | 2: 881  | 2: 884  |
| Kahramanmaraş-Pazarcık'ta Meydana Gelen Deprem Hk. 4 | Disaster                    | 1 | 1 | 1 | 2: 881  | 2: 884  |
| Kahramanmaraş-Pazarcık'ta Meydana Gelen Deprem Hk. 4 | Shelter&meal\Sheltering     | 1 | 1 | 1 | 2: 886  | 2: 892  |
| Kahramanmaraş-Pazarcık'ta Meydana Gelen Deprem Hk. 4 | Shelter&meal\Sheltering     | 1 | 1 | 1 | 2: 886  | 2: 892  |
| Kahramanmaraş-Pazarcık'ta Meydana Gelen Deprem Hk. 4 | Disaster                    | 1 | 1 | 1 | 2: 1131 | 2: 1134 |
| Kahramanmaraş-Pazarcık'ta Meydana Gelen Deprem Hk. 4 | Disaster                    | 1 | 1 | 1 | 2: 1131 | 2: 1134 |
| Kahramanmaraş-Pazarcık'ta Meydana Gelen Deprem Hk. 4 | Shelter&meal\Mobile kitchen | 1 | 1 | 1 | 2: 1197 | 2: 1208 |
| Kahramanmaraş-Pazarcık'ta Meydana Gelen Deprem Hk. 4 | Shelter&meal\Mobile kitchen | 1 | 1 | 1 | 2: 1197 | 2: 1208 |
| Kahramanmaraş-Pazarcık'ta Meydana Gelen Deprem Hk. 4 | Shelter&meal\Mobile bakery  | 1 | 1 | 1 | 2: 1229 | 2: 1239 |
| Kahramanmaraş-Pazarcık'ta Meydana Gelen Deprem Hk. 4 | Shelter&meal\Mobile bakery  | 1 | 1 | 1 | 2: 1229 | 2: 1239 |
| Kahramanmaraş-Pazarcık'ta Meydana Gelen Deprem Hk. 4 | Disaster                    | 1 | 1 | 1 | 2: 1245 | 2: 1248 |
| Kahramanmaraş-Pazarcık'ta Meydana Gelen Deprem Hk. 4 | Disaster                    | 1 | 1 | 1 | 2: 1245 | 2: 1248 |
| Kahramanmaraş-Pazarcık'ta Meydana Gelen Deprem Hk. 4 | Response\Military           | 1 | 1 | 1 | 2: 1313 | 2: 1320 |
| Kahramanmaraş-Pazarcık'ta Meydana Gelen Deprem Hk. 4 | Response\Military           | 1 | 1 | 1 | 2: 1313 | 2: 1320 |
| Kahramanmaraş-Pazarcık'ta Meydana Gelen Deprem Hk. 4 | Shelter&meal\Mobile kitchen | 1 | 1 | 1 | 2: 1328 | 2: 1339 |
| Kahramanmaraş-Pazarcık'ta Meydana Gelen Deprem Hk. 4 | Shelter&meal\Mobile kitchen | 1 | 1 | 1 | 2: 1328 | 2: 1339 |
| Kahramanmaraş-Pazarcık'ta Meydana Gelen Deprem Hk. 4 | Shelter&meal\Mobile bakery  | 1 | 1 | 1 | 2: 1344 | 2: 1354 |
| Kahramanmaraş-Pazarcık'ta Meydana Gelen Deprem Hk. 4 | Shelter&meal\Mobile bakery  | 1 | 1 | 1 | 2: 1344 | 2: 1354 |
| Kahramanmaraş-Pazarcık'ta Meydana Gelen Deprem Hk. 4 | Shelter&meal\Mobile kitchen | 1 | 1 | 1 | 2: 1412 | 2: 1423 |
| Kahramanmaraş-Pazarcık'ta Meydana Gelen Deprem Hk. 4 | Shelter&meal\Mobile kitchen | 1 | 1 | 1 | 2: 1412 | 2: 1423 |

|                                                      |                               |   |   |   |         |         |
|------------------------------------------------------|-------------------------------|---|---|---|---------|---------|
| Kahramanmaraş-Pazarcık'ta Meydana Gelen Deprem Hk. 4 | Disaster                      | 1 | 1 | 1 | 2: 1447 | 2: 1450 |
| Kahramanmaraş-Pazarcık'ta Meydana Gelen Deprem Hk. 4 | Disaster                      | 1 | 1 | 1 | 2: 1447 | 2: 1450 |
| Kahramanmaraş-Pazarcık'ta Meydana Gelen Deprem Hk. 4 | Response\Psychosocial support | 1 | 1 | 1 | 2: 1452 | 2: 1461 |
| Kahramanmaraş-Pazarcık'ta Meydana Gelen Deprem Hk. 4 | Response\Psychosocial support | 1 | 1 | 1 | 2: 1452 | 2: 1461 |
| Kahramanmaraş-Pazarcık'ta Meydana Gelen Deprem Hk. 4 | Response\Welfare service      | 1 | 1 | 1 | 2: 1485 | 2: 1497 |
| Kahramanmaraş-Pazarcık'ta Meydana Gelen Deprem Hk. 4 | Response\Welfare service      | 1 | 1 | 1 | 2: 1485 | 2: 1497 |
| Kahramanmaraş-Pazarcık'ta Meydana Gelen Deprem Hk. 4 | Kahramanmaraş                 | 1 | 0 | 0 | 2: 1508 | 2: 1520 |
| Kahramanmaraş-Pazarcık'ta Meydana Gelen Deprem Hk. 4 | Pazarcık                      | 0 | 1 | 0 | 2: 1508 | 2: 1520 |
| Kahramanmaraş-Pazarcık'ta Meydana Gelen Deprem Hk. 4 | Disaster                      | 1 | 1 | 1 | 2: 1581 | 2: 1584 |
| Kahramanmaraş-Pazarcık'ta Meydana Gelen Deprem Hk. 4 | Disaster                      | 1 | 1 | 1 | 2: 1581 | 2: 1584 |
| Kahramanmaraş-Pazarcık'ta Meydana Gelen Deprem Hk. 4 | Kahramanmaraş                 | 1 | 0 | 0 | 2: 1608 | 2: 1620 |
| Kahramanmaraş-Pazarcık'ta Meydana Gelen Deprem Hk. 4 | Pazarcık                      | 0 | 1 | 0 | 2: 1608 | 2: 1620 |
| Kahramanmaraş-Pazarcık'ta Meydana Gelen Deprem Hk. 4 | Disaster                      | 1 | 1 | 1 | 2: 1950 | 2: 1953 |
| Kahramanmaraş-Pazarcık'ta Meydana Gelen Deprem Hk. 4 | Disaster                      | 1 | 1 | 1 | 2: 1950 | 2: 1953 |
| Kahramanmaraş-Pazarcık'ta Meydana Gelen Deprem Hk. 4 | Coordination\Public relations | 1 | 1 | 1 | 2: 2109 | 2: 2114 |
| Kahramanmaraş-Pazarcık'ta Meydana Gelen Deprem Hk. 4 | Coordination\Public relations | 1 | 1 | 1 | 2: 2109 | 2: 2114 |
| Kahramanmaraş-Pazarcık'ta Meydana Gelen Deprem Hk. 4 | AFAD                          | 1 | 1 | 1 | 2: 2149 | 2: 2152 |
| Kahramanmaraş-Pazarcık'ta Meydana Gelen Deprem Hk. 4 | AFAD                          | 1 | 1 | 1 | 2: 2149 | 2: 2152 |
| Kahramanmaraş-Pazarcık'ta Meydana Gelen Deprem Hk. 4 | AFAD                          | 1 | 1 | 1 | 2: 2207 | 2: 2210 |
| Kahramanmaraş-Pazarcık'ta Meydana Gelen Deprem Hk. 4 | AFAD                          | 1 | 1 | 1 | 2: 2207 | 2: 2210 |

|                                                             |                           |   |   |   |         |         |
|-------------------------------------------------------------|---------------------------|---|---|---|---------|---------|
| Kahramanmaraş-<br>Pazarcık'ta Meydana<br>Gelen Deprem Hk. 4 | AFAD                      | 1 | 1 | 1 | 2: 2324 | 2: 2327 |
| Kahramanmaraş-<br>Pazarcık'ta Meydana<br>Gelen Deprem Hk. 4 | AFAD                      | 1 | 1 | 1 | 2: 2324 | 2: 2327 |
| Kahramanmaraş-<br>Pazarcık'ta Meydana<br>Gelen Deprem Hk. 4 | Response\Search&Rescue    | 1 | 1 | 1 | 2: 2418 | 2: 2431 |
| Kahramanmaraş-<br>Pazarcık'ta Meydana<br>Gelen Deprem Hk. 4 | Response\Search&Rescue    | 1 | 1 | 1 | 2: 2418 | 2: 2431 |
| Kahramanmaraş-<br>Pazarcık'ta Meydana<br>Gelen Deprem Hk. 4 | Disaster                  | 1 | 1 | 1 | 2: 2482 | 2: 2485 |
| Kahramanmaraş-<br>Pazarcık'ta Meydana<br>Gelen Deprem Hk. 4 | Disaster                  | 1 | 1 | 1 | 2: 2482 | 2: 2485 |
| Kahramanmaraş-<br>Pazarcık'ta Meydana<br>Gelen Deprem Hk. 4 | AFAD                      | 1 | 1 | 1 | 2: 2500 | 2: 2503 |
| Kahramanmaraş-<br>Pazarcık'ta Meydana<br>Gelen Deprem Hk. 4 | AFAD                      | 1 | 1 | 1 | 2: 2500 | 2: 2503 |
| Kahramanmaraş-<br>Pazarcık'ta Meydana<br>Gelen Deprem Hk. 4 | Preparedness\Preparedness | 1 | 1 | 1 | 2: 2564 | 2: 2574 |
| Kahramanmaraş-<br>Pazarcık'ta Meydana<br>Gelen Deprem Hk. 4 | Preparedness\Preparedness | 1 | 1 | 1 | 2: 2564 | 2: 2574 |
| Kahramanmaraş-<br>Pazarcık'ta Meydana<br>Gelen Deprem Hk. 4 | Disaster                  | 1 | 1 | 1 | 2: 2564 | 2: 2567 |
| Kahramanmaraş-<br>Pazarcık'ta Meydana<br>Gelen Deprem Hk. 4 | Disaster                  | 1 | 1 | 1 | 2: 2564 | 2: 2567 |
| Kahramanmaraş-<br>Pazarcık'ta Meydana<br>Gelen Deprem Hk. 4 | Disaster                  | 1 | 1 | 1 | 2: 2612 | 2: 2615 |
| Kahramanmaraş-<br>Pazarcık'ta Meydana<br>Gelen Deprem Hk. 4 | Disaster                  | 1 | 1 | 1 | 2: 2612 | 2: 2615 |
| Kahramanmaraş-<br>Pazarcık'ta Meydana<br>Gelen Deprem Hk. 4 | Recovery\Fund drive       | 1 | 1 | 1 | 2: 2673 | 2: 2691 |
| Kahramanmaraş-<br>Pazarcık'ta Meydana<br>Gelen Deprem Hk. 4 | Recovery\Fund drive       | 1 | 1 | 1 | 2: 2673 | 2: 2691 |
| Kahramanmaraş-<br>Pazarcık'ta Meydana<br>Gelen Deprem Hk. 4 | Kahramanmaraş             | 1 | 0 | 0 | 3: 17   | 3: 29   |
| Kahramanmaraş-<br>Pazarcık'ta Meydana<br>Gelen Deprem Hk. 4 | Pazarcık                  | 0 | 1 | 0 | 3: 17   | 3: 29   |
| Kahramanmaraş-<br>Pazarcık'ta Meydana<br>Gelen Deprem Hk. 4 | Earthquake                | 1 | 1 | 1 | 3: 57   | 3: 62   |
| Kahramanmaraş-<br>Pazarcık'ta Meydana<br>Gelen Deprem Hk. 4 | Earthquake                | 1 | 1 | 1 | 3: 57   | 3: 62   |



|                                                             |                                 |   |   |   |        |        |
|-------------------------------------------------------------|---------------------------------|---|---|---|--------|--------|
| Kahramanmaraş-<br>Pazarcık'ta Meydana<br>Gelen Deprem Hk. 4 | AFAD                            | 1 | 1 | 1 | 3: 97  | 3: 100 |
| Kahramanmaraş-<br>Pazarcık'ta Meydana<br>Gelen Deprem Hk. 4 | AFAD                            | 1 | 1 | 1 | 3: 97  | 3: 100 |
| Kahramanmaraş-<br>Pazarcık'ta Meydana<br>Gelen Deprem Hk. 4 | Earthquake                      | 1 | 1 | 1 | 3: 148 | 3: 153 |
| Kahramanmaraş-<br>Pazarcık'ta Meydana<br>Gelen Deprem Hk. 4 | Earthquake                      | 1 | 1 | 1 | 3: 148 | 3: 153 |
| Kahramanmaraş-<br>Pazarcık'ta Meydana<br>Gelen Deprem Hk. 4 | Coordination\Social media       | 1 | 0 | 0 | 3: 227 | 3: 238 |
| Kahramanmaraş-<br>Pazarcık'ta Meydana<br>Gelen Deprem Hk. 4 | Coordination\Social media usage | 0 | 1 | 0 | 3: 227 | 3: 238 |
| Kahramanmaraş-<br>Pazarcık'ta Meydana<br>Gelen Deprem Hk. 4 | AFAD                            | 1 | 1 | 1 | 3: 283 | 3: 286 |
| Kahramanmaraş-<br>Pazarcık'ta Meydana<br>Gelen Deprem Hk. 4 | AFAD                            | 1 | 1 | 1 | 3: 283 | 3: 286 |
| Kahramanmaraş-<br>Pazarcık'ta Meydana<br>Gelen Deprem Hk. 4 | AFAD                            | 1 | 1 | 1 | 3: 305 | 3: 308 |
| Kahramanmaraş-<br>Pazarcık'ta Meydana<br>Gelen Deprem Hk. 4 | AFAD                            | 1 | 1 | 1 | 3: 305 | 3: 308 |
| Kahramanmaraş-<br>Pazarcık'ta Meydana<br>Gelen Deprem Hk. 4 | Coordination\Information        | 1 | 1 | 1 | 3: 350 | 3: 361 |
| Kahramanmaraş-<br>Pazarcık'ta Meydana<br>Gelen Deprem Hk. 4 | Coordination\Information        | 1 | 1 | 1 | 3: 350 | 3: 361 |
| Kahramanmaraş-<br>Pazarcık'ta Meydana<br>Gelen Deprem Hk. 4 | Recovery\Peacemaking            | 1 | 1 | 1 | 3: 366 | 3: 375 |
| Kahramanmaraş-<br>Pazarcık'ta Meydana<br>Gelen Deprem Hk. 4 | Recovery\Peacemaking            | 1 | 1 | 1 | 3: 366 | 3: 375 |
| Kahramanmaraş-<br>Pazarcık'ta Meydana<br>Gelen Deprem Hk. 4 | Coordination\Social media       | 1 | 0 | 0 | 3: 422 | 3: 433 |
| Kahramanmaraş-<br>Pazarcık'ta Meydana<br>Gelen Deprem Hk. 4 | Coordination\Social media usage | 0 | 1 | 0 | 3: 422 | 3: 433 |
| Kahramanmaraş-<br>Pazarcık'ta Meydana<br>Gelen Deprem Hk. 4 | Disaster                        | 1 | 1 | 1 | 3: 524 | 3: 527 |
| Kahramanmaraş-<br>Pazarcık'ta Meydana<br>Gelen Deprem Hk. 4 | Disaster                        | 1 | 1 | 1 | 3: 524 | 3: 527 |
| Kahramanmaraş-<br>Pazarcık'ta Meydana<br>Gelen Deprem Hk. 4 | Emergency                       | 1 | 1 | 1 | 3: 532 | 3: 541 |
| Kahramanmaraş-<br>Pazarcık'ta Meydana<br>Gelen Deprem Hk. 4 | Emergency                       | 1 | 1 | 1 | 3: 532 | 3: 541 |

|                                                             |               |   |   |   |        |        |
|-------------------------------------------------------------|---------------|---|---|---|--------|--------|
| Kahramanmaraş-<br>Pazarcık'ta Meydana<br>Gelen Deprem Hk. 5 | Kahramanmaraş | 1 | 0 | 0 | 1: 17  | 1: 29  |
| Kahramanmaraş-<br>Pazarcık'ta Meydana<br>Gelen Deprem Hk. 5 | Pazarcık      | 0 | 1 | 0 | 1: 17  | 1: 29  |
| Kahramanmaraş-<br>Pazarcık'ta Meydana<br>Gelen Deprem Hk. 5 | Earthquake    | 1 | 1 | 1 | 1: 57  | 1: 62  |
| Kahramanmaraş-<br>Pazarcık'ta Meydana<br>Gelen Deprem Hk. 5 | Earthquake    | 1 | 1 | 1 | 1: 57  | 1: 62  |
| Kahramanmaraş-<br>Pazarcık'ta Meydana<br>Gelen Deprem Hk. 5 | AFAD          | 1 | 1 | 1 | 1: 97  | 1: 100 |
| Kahramanmaraş-<br>Pazarcık'ta Meydana<br>Gelen Deprem Hk. 5 | AFAD          | 1 | 1 | 1 | 1: 97  | 1: 100 |
| Kahramanmaraş-<br>Pazarcık'ta Meydana<br>Gelen Deprem Hk. 5 | Earthquake    | 1 | 1 | 1 | 1: 148 | 1: 153 |
| Kahramanmaraş-<br>Pazarcık'ta Meydana<br>Gelen Deprem Hk. 5 | Earthquake    | 1 | 1 | 1 | 1: 148 | 1: 153 |
| Kahramanmaraş-<br>Pazarcık'ta Meydana<br>Gelen Deprem Hk. 5 | Kahramanmaraş | 1 | 0 | 0 | 1: 178 | 1: 190 |
| Kahramanmaraş-<br>Pazarcık'ta Meydana<br>Gelen Deprem Hk. 5 | Pazarcık      | 0 | 1 | 0 | 1: 178 | 1: 190 |
| Kahramanmaraş-<br>Pazarcık'ta Meydana<br>Gelen Deprem Hk. 5 | Earthquake    | 1 | 1 | 1 | 1: 218 | 1: 223 |
| Kahramanmaraş-<br>Pazarcık'ta Meydana<br>Gelen Deprem Hk. 5 | Earthquake    | 1 | 1 | 1 | 1: 218 | 1: 223 |
| Kahramanmaraş-<br>Pazarcık'ta Meydana<br>Gelen Deprem Hk. 5 | Kahramanmaraş | 1 | 0 | 0 | 1: 296 | 1: 308 |
| Kahramanmaraş-<br>Pazarcık'ta Meydana<br>Gelen Deprem Hk. 5 | Pazarcık      | 0 | 1 | 0 | 1: 296 | 1: 308 |
| Kahramanmaraş-<br>Pazarcık'ta Meydana<br>Gelen Deprem Hk. 5 | Earthquake    | 1 | 1 | 1 | 1: 336 | 1: 341 |
| Kahramanmaraş-<br>Pazarcık'ta Meydana<br>Gelen Deprem Hk. 5 | Earthquake    | 1 | 1 | 1 | 1: 336 | 1: 341 |
| Kahramanmaraş-<br>Pazarcık'ta Meydana<br>Gelen Deprem Hk. 5 | Kahramanmaraş | 1 | 0 | 0 | 1: 404 | 1: 416 |
| Kahramanmaraş-<br>Pazarcık'ta Meydana<br>Gelen Deprem Hk. 5 | Pazarcık      | 0 | 1 | 0 | 1: 404 | 1: 416 |
| Kahramanmaraş-<br>Pazarcık'ta Meydana<br>Gelen Deprem Hk. 5 | Earthquake    | 1 | 1 | 1 | 1: 462 | 1: 467 |
| Kahramanmaraş-<br>Pazarcık'ta Meydana<br>Gelen Deprem Hk. 5 | Earthquake    | 1 | 1 | 1 | 1: 462 | 1: 467 |

|                                                      |                           |   |   |   |         |         |
|------------------------------------------------------|---------------------------|---|---|---|---------|---------|
| Kahramanmaraş-Pazarcık'ta Meydana Gelen Deprem Hk. 5 | Earthquake                | 1 | 1 | 1 | 1: 549  | 1: 554  |
| Kahramanmaraş-Pazarcık'ta Meydana Gelen Deprem Hk. 5 | Earthquake                | 1 | 1 | 1 | 1: 549  | 1: 554  |
| Kahramanmaraş-Pazarcık'ta Meydana Gelen Deprem Hk. 5 | Kahramanmaraş             | 1 | 0 | 0 | 1: 631  | 1: 643  |
| Kahramanmaraş-Pazarcık'ta Meydana Gelen Deprem Hk. 5 | Pazarcık                  | 0 | 1 | 0 | 1: 631  | 1: 643  |
| Kahramanmaraş-Pazarcık'ta Meydana Gelen Deprem Hk. 5 | Kahramanmaraş             | 1 | 0 | 0 | 1: 853  | 1: 865  |
| Kahramanmaraş-Pazarcık'ta Meydana Gelen Deprem Hk. 5 | Pazarcık                  | 0 | 1 | 0 | 1: 853  | 1: 865  |
| Kahramanmaraş-Pazarcık'ta Meydana Gelen Deprem Hk. 5 | Response\Number of staff  | 1 | 0 | 0 | 1: 1040 | 1: 1054 |
| Kahramanmaraş-Pazarcık'ta Meydana Gelen Deprem Hk. 5 | Response\Number           | 0 | 1 | 0 | 1: 1040 | 1: 1054 |
| Kahramanmaraş-Pazarcık'ta Meydana Gelen Deprem Hk. 5 | Response\Military         | 1 | 1 | 1 | 1: 1396 | 1: 1403 |
| Kahramanmaraş-Pazarcık'ta Meydana Gelen Deprem Hk. 5 | Response\Military         | 1 | 1 | 1 | 1: 1396 | 1: 1403 |
| Kahramanmaraş-Pazarcık'ta Meydana Gelen Deprem Hk. 5 | AFAD                      | 1 | 1 | 1 | 1: 1472 | 1: 1475 |
| Kahramanmaraş-Pazarcık'ta Meydana Gelen Deprem Hk. 5 | AFAD                      | 1 | 1 | 1 | 1: 1472 | 1: 1475 |
| Kahramanmaraş-Pazarcık'ta Meydana Gelen Deprem Hk. 5 | Kahramanmaraş             | 1 | 0 | 0 | 1: 1592 | 1: 1604 |
| Kahramanmaraş-Pazarcık'ta Meydana Gelen Deprem Hk. 5 | Pazarcık                  | 0 | 1 | 0 | 1: 1592 | 1: 1604 |
| Kahramanmaraş-Pazarcık'ta Meydana Gelen Deprem Hk. 5 | Coordination\Coordination | 1 | 1 | 1 | 1: 1755 | 1: 1766 |
| Kahramanmaraş-Pazarcık'ta Meydana Gelen Deprem Hk. 5 | Coordination\Coordination | 1 | 1 | 1 | 1: 1755 | 1: 1766 |
| Kahramanmaraş-Pazarcık'ta Meydana Gelen Deprem Hk. 5 | Response\Search&Rescue    | 1 | 1 | 1 | 1: 2103 | 1: 2116 |
| Kahramanmaraş-Pazarcık'ta Meydana Gelen Deprem Hk. 5 | Response\Search&Rescue    | 1 | 1 | 1 | 1: 2103 | 1: 2116 |
| Kahramanmaraş-Pazarcık'ta Meydana Gelen Deprem Hk. 5 | Response\Number of staff  | 1 | 0 | 0 | 1: 2263 | 1: 2285 |
| Kahramanmaraş-Pazarcık'ta Meydana Gelen Deprem Hk. 5 | Response\Search&Rescue    | 1 | 1 | 1 | 1: 2263 | 1: 2276 |

|                                                      |                            |   |   |   |         |         |
|------------------------------------------------------|----------------------------|---|---|---|---------|---------|
| Kahramanmaraş-Pazarcık'ta Meydana Gelen Deprem Hk. 5 | Response\Search&Rescue     | 1 | 1 | 1 | 1: 2263 | 1: 2276 |
| Kahramanmaraş-Pazarcık'ta Meydana Gelen Deprem Hk. 5 | Response\Number            | 0 | 1 | 0 | 1: 2263 | 1: 2285 |
| Kahramanmaraş-Pazarcık'ta Meydana Gelen Deprem Hk. 5 | Disaster                   | 1 | 1 | 1 | 1: 2306 | 1: 2309 |
| Kahramanmaraş-Pazarcık'ta Meydana Gelen Deprem Hk. 5 | Disaster                   | 1 | 1 | 1 | 1: 2306 | 1: 2309 |
| Kahramanmaraş-Pazarcık'ta Meydana Gelen Deprem Hk. 5 | Disaster                   | 1 | 1 | 1 | 1: 2325 | 1: 2328 |
| Kahramanmaraş-Pazarcık'ta Meydana Gelen Deprem Hk. 5 | Disaster                   | 1 | 1 | 1 | 1: 2325 | 1: 2328 |
| Kahramanmaraş-Pazarcık'ta Meydana Gelen Deprem Hk. 5 | Kahramanmaraş              | 1 | 0 | 0 | 1: 2661 | 1: 2673 |
| Kahramanmaraş-Pazarcık'ta Meydana Gelen Deprem Hk. 5 | Pazarcık                   | 0 | 1 | 0 | 1: 2661 | 1: 2673 |
| Kahramanmaraş-Pazarcık'ta Meydana Gelen Deprem Hk. 5 | Disaster                   | 1 | 1 | 1 | 1: 2769 | 1: 2772 |
| Kahramanmaraş-Pazarcık'ta Meydana Gelen Deprem Hk. 5 | Disaster                   | 1 | 1 | 1 | 1: 2769 | 1: 2772 |
| Kahramanmaraş-Pazarcık'ta Meydana Gelen Deprem Hk. 5 | Kahramanmaraş              | 1 | 0 | 0 | 1: 2792 | 1: 2804 |
| Kahramanmaraş-Pazarcık'ta Meydana Gelen Deprem Hk. 5 | Pazarcık                   | 0 | 1 | 0 | 1: 2792 | 1: 2804 |
| Kahramanmaraş-Pazarcık'ta Meydana Gelen Deprem Hk. 5 | Earthquake                 | 1 | 1 | 1 | 1: 2930 | 1: 2935 |
| Kahramanmaraş-Pazarcık'ta Meydana Gelen Deprem Hk. 5 | Earthquake                 | 1 | 1 | 1 | 1: 2930 | 1: 2935 |
| Kahramanmaraş-Pazarcık'ta Meydana Gelen Deprem Hk. 5 | Coordination\Communication | 1 | 1 | 1 | 1: 3229 | 1: 3236 |
| Kahramanmaraş-Pazarcık'ta Meydana Gelen Deprem Hk. 5 | Coordination\Communication | 1 | 1 | 1 | 1: 3229 | 1: 3236 |
| Kahramanmaraş-Pazarcık'ta Meydana Gelen Deprem Hk. 5 | Disaster                   | 1 | 1 | 1 | 1: 3270 | 1: 3273 |
| Kahramanmaraş-Pazarcık'ta Meydana Gelen Deprem Hk. 5 | Disaster                   | 1 | 1 | 1 | 1: 3270 | 1: 3273 |
| Kahramanmaraş-Pazarcık'ta Meydana Gelen Deprem Hk. 5 | Kahramanmaraş              | 1 | 0 | 0 | 2: 17   | 2: 29   |
| Kahramanmaraş-Pazarcık'ta Meydana Gelen Deprem Hk. 5 | Pazarcık                   | 0 | 1 | 0 | 2: 17   | 2: 29   |

|                                                      |                             |   |   |   |        |        |
|------------------------------------------------------|-----------------------------|---|---|---|--------|--------|
| Kahramanmaraş-Pazarcık'ta Meydana Gelen Deprem Hk. 5 | Earthquake                  | 1 | 1 | 1 | 2: 57  | 2: 62  |
| Kahramanmaraş-Pazarcık'ta Meydana Gelen Deprem Hk. 5 | Earthquake                  | 1 | 1 | 1 | 2: 57  | 2: 62  |
| Kahramanmaraş-Pazarcık'ta Meydana Gelen Deprem Hk. 5 | AFAD                        | 1 | 1 | 1 | 2: 97  | 2: 100 |
| Kahramanmaraş-Pazarcık'ta Meydana Gelen Deprem Hk. 5 | AFAD                        | 1 | 1 | 1 | 2: 97  | 2: 100 |
| Kahramanmaraş-Pazarcık'ta Meydana Gelen Deprem Hk. 5 | Earthquake                  | 1 | 1 | 1 | 2: 148 | 2: 153 |
| Kahramanmaraş-Pazarcık'ta Meydana Gelen Deprem Hk. 5 | Earthquake                  | 1 | 1 | 1 | 2: 148 | 2: 153 |
| Kahramanmaraş-Pazarcık'ta Meydana Gelen Deprem Hk. 5 | Disaster                    | 1 | 1 | 1 | 2: 245 | 2: 248 |
| Kahramanmaraş-Pazarcık'ta Meydana Gelen Deprem Hk. 5 | Disaster                    | 1 | 1 | 1 | 2: 245 | 2: 248 |
| Kahramanmaraş-Pazarcık'ta Meydana Gelen Deprem Hk. 5 | Response\Number of staff    | 1 | 0 | 0 | 2: 295 | 2: 317 |
| Kahramanmaraş-Pazarcık'ta Meydana Gelen Deprem Hk. 5 | Response\Search&Rescue      | 1 | 1 | 1 | 2: 295 | 2: 308 |
| Kahramanmaraş-Pazarcık'ta Meydana Gelen Deprem Hk. 5 | Response\Search&Rescue      | 1 | 1 | 1 | 2: 295 | 2: 308 |
| Kahramanmaraş-Pazarcık'ta Meydana Gelen Deprem Hk. 5 | Response\Number             | 0 | 1 | 0 | 2: 295 | 2: 317 |
| Kahramanmaraş-Pazarcık'ta Meydana Gelen Deprem Hk. 5 | Response\Coast guard&Navy   | 1 | 1 | 1 | 2: 348 | 2: 361 |
| Kahramanmaraş-Pazarcık'ta Meydana Gelen Deprem Hk. 5 | Response\Coast guard&Navy   | 1 | 1 | 1 | 2: 348 | 2: 361 |
| Kahramanmaraş-Pazarcık'ta Meydana Gelen Deprem Hk. 5 | Shelter&meal\Mobile kitchen | 1 | 1 | 1 | 2: 653 | 2: 664 |
| Kahramanmaraş-Pazarcık'ta Meydana Gelen Deprem Hk. 5 | Shelter&meal\Mobile kitchen | 1 | 1 | 1 | 2: 653 | 2: 664 |
| Kahramanmaraş-Pazarcık'ta Meydana Gelen Deprem Hk. 5 | Shelter&meal\Mobile bakery  | 1 | 1 | 1 | 2: 671 | 2: 681 |
| Kahramanmaraş-Pazarcık'ta Meydana Gelen Deprem Hk. 5 | Shelter&meal\Mobile bakery  | 1 | 1 | 1 | 2: 671 | 2: 681 |
| Kahramanmaraş-Pazarcık'ta Meydana Gelen Deprem Hk. 5 | Kahramanmaraş               | 1 | 0 | 0 | 2: 683 | 2: 695 |
| Kahramanmaraş-Pazarcık'ta Meydana Gelen Deprem Hk. 5 | Pazarcık                    | 0 | 1 | 0 | 2: 683 | 2: 695 |

|                                                      |                             |   |   |   |         |         |
|------------------------------------------------------|-----------------------------|---|---|---|---------|---------|
| Kahramanmaraş-Pazarcık'ta Meydana Gelen Deprem Hk. 5 | Response\Military           | 1 | 1 | 1 | 2: 722  | 2: 729  |
| Kahramanmaraş-Pazarcık'ta Meydana Gelen Deprem Hk. 5 | Response\Military           | 1 | 1 | 1 | 2: 722  | 2: 729  |
| Kahramanmaraş-Pazarcık'ta Meydana Gelen Deprem Hk. 5 | Shelter&meal\Mobile kitchen | 1 | 1 | 1 | 2: 831  | 2: 842  |
| Kahramanmaraş-Pazarcık'ta Meydana Gelen Deprem Hk. 5 | Shelter&meal\Mobile kitchen | 1 | 1 | 1 | 2: 831  | 2: 842  |
| Kahramanmaraş-Pazarcık'ta Meydana Gelen Deprem Hk. 5 | Shelter&meal\Mobile bakery  | 1 | 1 | 1 | 2: 855  | 2: 865  |
| Kahramanmaraş-Pazarcık'ta Meydana Gelen Deprem Hk. 5 | Shelter&meal\Mobile bakery  | 1 | 1 | 1 | 2: 855  | 2: 865  |
| Kahramanmaraş-Pazarcık'ta Meydana Gelen Deprem Hk. 5 | Kahramanmaraş               | 1 | 0 | 0 | 2: 867  | 2: 879  |
| Kahramanmaraş-Pazarcık'ta Meydana Gelen Deprem Hk. 5 | Pazarcık                    | 0 | 1 | 0 | 2: 867  | 2: 879  |
| Kahramanmaraş-Pazarcık'ta Meydana Gelen Deprem Hk. 5 | Kahramanmaraş               | 1 | 0 | 0 | 2: 969  | 2: 981  |
| Kahramanmaraş-Pazarcık'ta Meydana Gelen Deprem Hk. 5 | Pazarcık                    | 0 | 1 | 0 | 2: 969  | 2: 981  |
| Kahramanmaraş-Pazarcık'ta Meydana Gelen Deprem Hk. 5 | Disaster                    | 1 | 1 | 1 | 2: 1012 | 2: 1015 |
| Kahramanmaraş-Pazarcık'ta Meydana Gelen Deprem Hk. 5 | Disaster                    | 1 | 1 | 1 | 2: 1012 | 2: 1015 |
| Kahramanmaraş-Pazarcık'ta Meydana Gelen Deprem Hk. 5 | Shelter&meal\Sheltering     | 1 | 1 | 1 | 2: 1017 | 2: 1023 |
| Kahramanmaraş-Pazarcık'ta Meydana Gelen Deprem Hk. 5 | Shelter&meal\Sheltering     | 1 | 1 | 1 | 2: 1017 | 2: 1023 |
| Kahramanmaraş-Pazarcık'ta Meydana Gelen Deprem Hk. 5 | Disaster                    | 1 | 1 | 1 | 2: 1236 | 2: 1239 |
| Kahramanmaraş-Pazarcık'ta Meydana Gelen Deprem Hk. 5 | Disaster                    | 1 | 1 | 1 | 2: 1236 | 2: 1239 |
| Kahramanmaraş-Pazarcık'ta Meydana Gelen Deprem Hk. 5 | Shelter&meal\Tent           | 1 | 1 | 1 | 2: 1292 | 2: 1296 |
| Kahramanmaraş-Pazarcık'ta Meydana Gelen Deprem Hk. 5 | Shelter&meal\Tent           | 1 | 1 | 1 | 2: 1292 | 2: 1296 |
| Kahramanmaraş-Pazarcık'ta Meydana Gelen Deprem Hk. 5 | Disaster                    | 1 | 1 | 1 | 2: 1379 | 2: 1382 |
| Kahramanmaraş-Pazarcık'ta Meydana Gelen Deprem Hk. 5 | Disaster                    | 1 | 1 | 1 | 2: 1379 | 2: 1382 |

|                                                      |                               |   |   |   |         |         |
|------------------------------------------------------|-------------------------------|---|---|---|---------|---------|
| Kahramanmaraş-Pazarcık'ta Meydana Gelen Deprem Hk. 5 | Shelter&meal\Mobile kitchen   | 1 | 1 | 1 | 2: 1437 | 2: 1448 |
| Kahramanmaraş-Pazarcık'ta Meydana Gelen Deprem Hk. 5 | Shelter&meal\Mobile kitchen   | 1 | 1 | 1 | 2: 1437 | 2: 1448 |
| Kahramanmaraş-Pazarcık'ta Meydana Gelen Deprem Hk. 5 | Shelter&meal\Mobile bakery    | 1 | 1 | 1 | 2: 1484 | 2: 1494 |
| Kahramanmaraş-Pazarcık'ta Meydana Gelen Deprem Hk. 5 | Shelter&meal\Mobile bakery    | 1 | 1 | 1 | 2: 1484 | 2: 1494 |
| Kahramanmaraş-Pazarcık'ta Meydana Gelen Deprem Hk. 5 | Disaster                      | 1 | 1 | 1 | 2: 1500 | 2: 1503 |
| Kahramanmaraş-Pazarcık'ta Meydana Gelen Deprem Hk. 5 | Disaster                      | 1 | 1 | 1 | 2: 1500 | 2: 1503 |
| Kahramanmaraş-Pazarcık'ta Meydana Gelen Deprem Hk. 5 | Response\Military             | 1 | 1 | 1 | 2: 1580 | 2: 1587 |
| Kahramanmaraş-Pazarcık'ta Meydana Gelen Deprem Hk. 5 | Response\Military             | 1 | 1 | 1 | 2: 1580 | 2: 1587 |
| Kahramanmaraş-Pazarcık'ta Meydana Gelen Deprem Hk. 5 | Shelter&meal\Mobile kitchen   | 1 | 1 | 1 | 2: 1595 | 2: 1606 |
| Kahramanmaraş-Pazarcık'ta Meydana Gelen Deprem Hk. 5 | Shelter&meal\Mobile kitchen   | 1 | 1 | 1 | 2: 1595 | 2: 1606 |
| Kahramanmaraş-Pazarcık'ta Meydana Gelen Deprem Hk. 5 | Shelter&meal\Mobile bakery    | 1 | 1 | 1 | 2: 1611 | 2: 1621 |
| Kahramanmaraş-Pazarcık'ta Meydana Gelen Deprem Hk. 5 | Shelter&meal\Mobile bakery    | 1 | 1 | 1 | 2: 1611 | 2: 1621 |
| Kahramanmaraş-Pazarcık'ta Meydana Gelen Deprem Hk. 5 | Shelter&meal\Mobile kitchen   | 1 | 1 | 1 | 2: 1679 | 2: 1690 |
| Kahramanmaraş-Pazarcık'ta Meydana Gelen Deprem Hk. 5 | Shelter&meal\Mobile kitchen   | 1 | 1 | 1 | 2: 1679 | 2: 1690 |
| Kahramanmaraş-Pazarcık'ta Meydana Gelen Deprem Hk. 5 | Disaster                      | 1 | 1 | 1 | 2: 1715 | 2: 1718 |
| Kahramanmaraş-Pazarcık'ta Meydana Gelen Deprem Hk. 5 | Disaster                      | 1 | 1 | 1 | 2: 1715 | 2: 1718 |
| Kahramanmaraş-Pazarcık'ta Meydana Gelen Deprem Hk. 5 | Response\Psychosocial support | 1 | 1 | 1 | 2: 1720 | 2: 1729 |
| Kahramanmaraş-Pazarcık'ta Meydana Gelen Deprem Hk. 5 | Response\Psychosocial support | 1 | 1 | 1 | 2: 1720 | 2: 1729 |
| Kahramanmaraş-Pazarcık'ta Meydana Gelen Deprem Hk. 5 | Response\Welfare service      | 1 | 1 | 1 | 2: 1753 | 2: 1765 |
| Kahramanmaraş-Pazarcık'ta Meydana Gelen Deprem Hk. 5 | Response\Welfare service      | 1 | 1 | 1 | 2: 1753 | 2: 1765 |

|                                                      |                                 |   |   |   |         |         |
|------------------------------------------------------|---------------------------------|---|---|---|---------|---------|
| Kahramanmaraş-Pazarcık'ta Meydana Gelen Deprem Hk. 5 | Kahramanmaraş                   | 1 | 0 | 0 | 2: 1776 | 2: 1788 |
| Kahramanmaraş-Pazarcık'ta Meydana Gelen Deprem Hk. 5 | Pazarcık                        | 0 | 1 | 0 | 2: 1776 | 2: 1788 |
| Kahramanmaraş-Pazarcık'ta Meydana Gelen Deprem Hk. 5 | Disaster                        | 1 | 1 | 1 | 2: 1899 | 2: 1902 |
| Kahramanmaraş-Pazarcık'ta Meydana Gelen Deprem Hk. 5 | Disaster                        | 1 | 1 | 1 | 2: 1899 | 2: 1902 |
| Kahramanmaraş-Pazarcık'ta Meydana Gelen Deprem Hk. 5 | Kahramanmaraş                   | 1 | 0 | 0 | 2: 1926 | 2: 1938 |
| Kahramanmaraş-Pazarcık'ta Meydana Gelen Deprem Hk. 5 | Pazarcık                        | 0 | 1 | 0 | 2: 1926 | 2: 1938 |
| Kahramanmaraş-Pazarcık'ta Meydana Gelen Deprem Hk. 5 | Disaster                        | 1 | 1 | 1 | 2: 2084 | 2: 2087 |
| Kahramanmaraş-Pazarcık'ta Meydana Gelen Deprem Hk. 5 | Disaster                        | 1 | 1 | 1 | 2: 2084 | 2: 2087 |
| Kahramanmaraş-Pazarcık'ta Meydana Gelen Deprem Hk. 5 | Disaster                        | 1 | 1 | 1 | 2: 2105 | 2: 2108 |
| Kahramanmaraş-Pazarcık'ta Meydana Gelen Deprem Hk. 5 | Disaster                        | 1 | 1 | 1 | 2: 2105 | 2: 2108 |
| Kahramanmaraş-Pazarcık'ta Meydana Gelen Deprem Hk. 5 | Coordination\Coordination       | 1 | 1 | 1 | 2: 2164 | 2: 2175 |
| Kahramanmaraş-Pazarcık'ta Meydana Gelen Deprem Hk. 5 | Coordination\Coordination       | 1 | 1 | 1 | 2: 2164 | 2: 2175 |
| Kahramanmaraş-Pazarcık'ta Meydana Gelen Deprem Hk. 5 | Coordination\Social media       | 1 | 0 | 0 | 2: 2306 | 2: 2317 |
| Kahramanmaraş-Pazarcık'ta Meydana Gelen Deprem Hk. 5 | Coordination\Social media usage | 0 | 1 | 0 | 2: 2306 | 2: 2317 |
| Kahramanmaraş-Pazarcık'ta Meydana Gelen Deprem Hk. 5 | Coordination\Disinformation     | 1 | 1 | 1 | 2: 2377 | 2: 2390 |
| Kahramanmaraş-Pazarcık'ta Meydana Gelen Deprem Hk. 5 | Coordination\Disinformation     | 1 | 1 | 1 | 2: 2377 | 2: 2390 |
| Kahramanmaraş-Pazarcık'ta Meydana Gelen Deprem Hk. 5 | Disaster                        | 1 | 1 | 1 | 2: 2741 | 2: 2744 |
| Kahramanmaraş-Pazarcık'ta Meydana Gelen Deprem Hk. 5 | Disaster                        | 1 | 1 | 1 | 2: 2741 | 2: 2744 |
| Kahramanmaraş-Pazarcık'ta Meydana Gelen Deprem Hk. 5 | Coordination\Public relations   | 1 | 1 | 1 | 2: 2900 | 2: 2905 |
| Kahramanmaraş-Pazarcık'ta Meydana Gelen Deprem Hk. 5 | Coordination\Public relations   | 1 | 1 | 1 | 2: 2900 | 2: 2905 |



|                                                             |                        |   |   |   |         |         |
|-------------------------------------------------------------|------------------------|---|---|---|---------|---------|
| Kahramanmaraş-<br>Pazarcık'ta Meydana<br>Gelen Deprem Hk. 5 | AFAD                   | 1 | 1 | 1 | 2: 2940 | 2: 2943 |
| Kahramanmaraş-<br>Pazarcık'ta Meydana<br>Gelen Deprem Hk. 5 | AFAD                   | 1 | 1 | 1 | 2: 2940 | 2: 2943 |
| Kahramanmaraş-<br>Pazarcık'ta Meydana<br>Gelen Deprem Hk. 5 | AFAD                   | 1 | 1 | 1 | 2: 2998 | 2: 3001 |
| Kahramanmaraş-<br>Pazarcık'ta Meydana<br>Gelen Deprem Hk. 5 | AFAD                   | 1 | 1 | 1 | 2: 2998 | 2: 3001 |
| Kahramanmaraş-<br>Pazarcık'ta Meydana<br>Gelen Deprem Hk. 5 | Response\Search&Rescue | 1 | 1 | 1 | 2: 3099 | 2: 3112 |
| Kahramanmaraş-<br>Pazarcık'ta Meydana<br>Gelen Deprem Hk. 5 | Response\Search&Rescue | 1 | 1 | 1 | 2: 3099 | 2: 3112 |
| Kahramanmaraş-<br>Pazarcık'ta Meydana<br>Gelen Deprem Hk. 5 | Disaster               | 1 | 1 | 1 | 2: 3163 | 2: 3166 |
| Kahramanmaraş-<br>Pazarcık'ta Meydana<br>Gelen Deprem Hk. 5 | Disaster               | 1 | 1 | 1 | 2: 3163 | 2: 3166 |
| Kahramanmaraş-<br>Pazarcık'ta Meydana<br>Gelen Deprem Hk. 5 | AFAD                   | 1 | 1 | 1 | 2: 3181 | 2: 3184 |
| Kahramanmaraş-<br>Pazarcık'ta Meydana<br>Gelen Deprem Hk. 5 | AFAD                   | 1 | 1 | 1 | 2: 3181 | 2: 3184 |
| Kahramanmaraş-<br>Pazarcık'ta Meydana<br>Gelen Deprem Hk. 5 | Recovery\Fund drive    | 1 | 1 | 1 | 2: 3254 | 2: 3272 |
| Kahramanmaraş-<br>Pazarcık'ta Meydana<br>Gelen Deprem Hk. 5 | Recovery\Fund drive    | 1 | 1 | 1 | 2: 3254 | 2: 3272 |
| Kahramanmaraş-<br>Pazarcık'ta Meydana<br>Gelen Deprem Hk. 5 | Kahramanmaraş          | 1 | 0 | 0 | 3: 17   | 3: 29   |
| Kahramanmaraş-<br>Pazarcık'ta Meydana<br>Gelen Deprem Hk. 5 | Pazarcık               | 0 | 1 | 0 | 3: 17   | 3: 29   |
| Kahramanmaraş-<br>Pazarcık'ta Meydana<br>Gelen Deprem Hk. 5 | Earthquake             | 1 | 1 | 1 | 3: 57   | 3: 62   |
| Kahramanmaraş-<br>Pazarcık'ta Meydana<br>Gelen Deprem Hk. 5 | Earthquake             | 1 | 1 | 1 | 3: 57   | 3: 62   |
| Kahramanmaraş-<br>Pazarcık'ta Meydana<br>Gelen Deprem Hk. 5 | AFAD                   | 1 | 1 | 1 | 3: 97   | 3: 100  |
| Kahramanmaraş-<br>Pazarcık'ta Meydana<br>Gelen Deprem Hk. 5 | AFAD                   | 1 | 1 | 1 | 3: 97   | 3: 100  |
| Kahramanmaraş-<br>Pazarcık'ta Meydana<br>Gelen Deprem Hk. 5 | Earthquake             | 1 | 1 | 1 | 3: 148  | 3: 153  |
| Kahramanmaraş-<br>Pazarcık'ta Meydana<br>Gelen Deprem Hk. 5 | Earthquake             | 1 | 1 | 1 | 3: 148  | 3: 153  |

|                                                             |                                 |   |   |   |        |        |
|-------------------------------------------------------------|---------------------------------|---|---|---|--------|--------|
| Kahramanmaraş-<br>Pazarcık'ta Meydana<br>Gelen Deprem Hk. 5 | AFAD                            | 1 | 1 | 1 | 3: 278 | 3: 281 |
| Kahramanmaraş-<br>Pazarcık'ta Meydana<br>Gelen Deprem Hk. 5 | AFAD                            | 1 | 1 | 1 | 3: 278 | 3: 281 |
| Kahramanmaraş-<br>Pazarcık'ta Meydana<br>Gelen Deprem Hk. 5 | Preparedness\Preparedness       | 1 | 1 | 1 | 3: 308 | 3: 318 |
| Kahramanmaraş-<br>Pazarcık'ta Meydana<br>Gelen Deprem Hk. 5 | Preparedness\Preparedness       | 1 | 1 | 1 | 3: 308 | 3: 318 |
| Kahramanmaraş-<br>Pazarcık'ta Meydana<br>Gelen Deprem Hk. 5 | Disaster                        | 1 | 1 | 1 | 3: 308 | 3: 311 |
| Kahramanmaraş-<br>Pazarcık'ta Meydana<br>Gelen Deprem Hk. 5 | Disaster                        | 1 | 1 | 1 | 3: 308 | 3: 311 |
| Kahramanmaraş-<br>Pazarcık'ta Meydana<br>Gelen Deprem Hk. 5 | Disaster                        | 1 | 1 | 1 | 3: 356 | 3: 359 |
| Kahramanmaraş-<br>Pazarcık'ta Meydana<br>Gelen Deprem Hk. 5 | Disaster                        | 1 | 1 | 1 | 3: 356 | 3: 359 |
| Kahramanmaraş-<br>Pazarcık'ta Meydana<br>Gelen Deprem Hk. 5 | Coordination\Social media       | 1 | 0 | 0 | 3: 451 | 3: 462 |
| Kahramanmaraş-<br>Pazarcık'ta Meydana<br>Gelen Deprem Hk. 5 | Coordination\Social media usage | 0 | 1 | 0 | 3: 451 | 3: 462 |
| Kahramanmaraş-<br>Pazarcık'ta Meydana<br>Gelen Deprem Hk. 5 | AFAD                            | 1 | 1 | 1 | 3: 507 | 3: 510 |
| Kahramanmaraş-<br>Pazarcık'ta Meydana<br>Gelen Deprem Hk. 5 | AFAD                            | 1 | 1 | 1 | 3: 507 | 3: 510 |
| Kahramanmaraş-<br>Pazarcık'ta Meydana<br>Gelen Deprem Hk. 5 | AFAD                            | 1 | 1 | 1 | 3: 529 | 3: 532 |
| Kahramanmaraş-<br>Pazarcık'ta Meydana<br>Gelen Deprem Hk. 5 | AFAD                            | 1 | 1 | 1 | 3: 529 | 3: 532 |
| Kahramanmaraş-<br>Pazarcık'ta Meydana<br>Gelen Deprem Hk. 5 | Coordination\Information        | 1 | 1 | 1 | 3: 574 | 3: 585 |
| Kahramanmaraş-<br>Pazarcık'ta Meydana<br>Gelen Deprem Hk. 5 | Coordination\Information        | 1 | 1 | 1 | 3: 574 | 3: 585 |
| Kahramanmaraş-<br>Pazarcık'ta Meydana<br>Gelen Deprem Hk. 5 | Recovery\Peacemaking            | 1 | 1 | 1 | 3: 590 | 3: 599 |
| Kahramanmaraş-<br>Pazarcık'ta Meydana<br>Gelen Deprem Hk. 5 | Recovery\Peacemaking            | 1 | 1 | 1 | 3: 590 | 3: 599 |
| Kahramanmaraş-<br>Pazarcık'ta Meydana<br>Gelen Deprem Hk. 5 | Coordination\Social media       | 1 | 0 | 0 | 3: 646 | 3: 657 |
| Kahramanmaraş-<br>Pazarcık'ta Meydana<br>Gelen Deprem Hk. 5 | Coordination\Social media usage | 0 | 1 | 0 | 3: 646 | 3: 657 |

|                                                      |               |   |   |   |        |        |
|------------------------------------------------------|---------------|---|---|---|--------|--------|
| Kahramanmaraş-Pazarcık'ta Meydana Gelen Deprem Hk. 5 | Disaster      | 1 | 1 | 1 | 3: 748 | 3: 751 |
| Kahramanmaraş-Pazarcık'ta Meydana Gelen Deprem Hk. 5 | Disaster      | 1 | 1 | 1 | 3: 748 | 3: 751 |
| Kahramanmaraş-Pazarcık'ta Meydana Gelen Deprem Hk. 5 | Emergency     | 1 | 1 | 1 | 3: 756 | 3: 765 |
| Kahramanmaraş-Pazarcık'ta Meydana Gelen Deprem Hk. 5 | Emergency     | 1 | 1 | 1 | 3: 756 | 3: 765 |
| Kahramanmaraş-Pazarcık'ta Meydana Gelen Deprem Hk. 6 | Kahramanmaraş | 1 | 0 | 0 | 1: 17  | 1: 29  |
| Kahramanmaraş-Pazarcık'ta Meydana Gelen Deprem Hk. 6 | Pazarcık      | 0 | 1 | 0 | 1: 17  | 1: 29  |
| Kahramanmaraş-Pazarcık'ta Meydana Gelen Deprem Hk. 6 | Earthquake    | 1 | 1 | 1 | 1: 57  | 1: 62  |
| Kahramanmaraş-Pazarcık'ta Meydana Gelen Deprem Hk. 6 | Earthquake    | 1 | 1 | 1 | 1: 57  | 1: 62  |
| Kahramanmaraş-Pazarcık'ta Meydana Gelen Deprem Hk. 6 | AFAD          | 1 | 1 | 1 | 1: 97  | 1: 100 |
| Kahramanmaraş-Pazarcık'ta Meydana Gelen Deprem Hk. 6 | AFAD          | 1 | 1 | 1 | 1: 97  | 1: 100 |
| Kahramanmaraş-Pazarcık'ta Meydana Gelen Deprem Hk. 6 | Earthquake    | 1 | 1 | 1 | 1: 148 | 1: 153 |
| Kahramanmaraş-Pazarcık'ta Meydana Gelen Deprem Hk. 6 | Earthquake    | 1 | 1 | 1 | 1: 148 | 1: 153 |
| Kahramanmaraş-Pazarcık'ta Meydana Gelen Deprem Hk. 6 | Kahramanmaraş | 1 | 0 | 0 | 1: 178 | 1: 190 |
| Kahramanmaraş-Pazarcık'ta Meydana Gelen Deprem Hk. 6 | Pazarcık      | 0 | 1 | 0 | 1: 178 | 1: 190 |
| Kahramanmaraş-Pazarcık'ta Meydana Gelen Deprem Hk. 6 | Earthquake    | 1 | 1 | 1 | 1: 218 | 1: 223 |
| Kahramanmaraş-Pazarcık'ta Meydana Gelen Deprem Hk. 6 | Earthquake    | 1 | 1 | 1 | 1: 218 | 1: 223 |
| Kahramanmaraş-Pazarcık'ta Meydana Gelen Deprem Hk. 6 | Kahramanmaraş | 1 | 0 | 0 | 1: 296 | 1: 308 |
| Kahramanmaraş-Pazarcık'ta Meydana Gelen Deprem Hk. 6 | Pazarcık      | 0 | 1 | 0 | 1: 296 | 1: 308 |
| Kahramanmaraş-Pazarcık'ta Meydana Gelen Deprem Hk. 6 | Earthquake    | 1 | 1 | 1 | 1: 336 | 1: 341 |
| Kahramanmaraş-Pazarcık'ta Meydana Gelen Deprem Hk. 6 | Earthquake    | 1 | 1 | 1 | 1: 336 | 1: 341 |

|                                                      |                           |   |   |   |         |         |
|------------------------------------------------------|---------------------------|---|---|---|---------|---------|
| Kahramanmaraş-Pazarcık'ta Meydana Gelen Deprem Hk. 6 | Kahramanmaraş             | 1 | 0 | 0 | 1: 404  | 1: 416  |
| Kahramanmaraş-Pazarcık'ta Meydana Gelen Deprem Hk. 6 | Pazarcık                  | 0 | 1 | 0 | 1: 404  | 1: 416  |
| Kahramanmaraş-Pazarcık'ta Meydana Gelen Deprem Hk. 6 | Earthquake                | 1 | 1 | 1 | 1: 462  | 1: 467  |
| Kahramanmaraş-Pazarcık'ta Meydana Gelen Deprem Hk. 6 | Earthquake                | 1 | 1 | 1 | 1: 462  | 1: 467  |
| Kahramanmaraş-Pazarcık'ta Meydana Gelen Deprem Hk. 6 | Earthquake                | 1 | 1 | 1 | 1: 549  | 1: 554  |
| Kahramanmaraş-Pazarcık'ta Meydana Gelen Deprem Hk. 6 | Earthquake                | 1 | 1 | 1 | 1: 549  | 1: 554  |
| Kahramanmaraş-Pazarcık'ta Meydana Gelen Deprem Hk. 6 | Kahramanmaraş             | 1 | 0 | 0 | 1: 631  | 1: 643  |
| Kahramanmaraş-Pazarcık'ta Meydana Gelen Deprem Hk. 6 | Pazarcık                  | 0 | 1 | 0 | 1: 631  | 1: 643  |
| Kahramanmaraş-Pazarcık'ta Meydana Gelen Deprem Hk. 6 | Response\Number of staff  | 1 | 0 | 0 | 1: 871  | 1: 885  |
| Kahramanmaraş-Pazarcık'ta Meydana Gelen Deprem Hk. 6 | Response\Number           | 0 | 1 | 0 | 1: 871  | 1: 885  |
| Kahramanmaraş-Pazarcık'ta Meydana Gelen Deprem Hk. 6 | Response\Military         | 1 | 1 | 1 | 1: 1261 | 1: 1268 |
| Kahramanmaraş-Pazarcık'ta Meydana Gelen Deprem Hk. 6 | Response\Military         | 1 | 1 | 1 | 1: 1261 | 1: 1268 |
| Kahramanmaraş-Pazarcık'ta Meydana Gelen Deprem Hk. 6 | AFAD                      | 1 | 1 | 1 | 1: 1409 | 1: 1412 |
| Kahramanmaraş-Pazarcık'ta Meydana Gelen Deprem Hk. 6 | AFAD                      | 1 | 1 | 1 | 1: 1409 | 1: 1412 |
| Kahramanmaraş-Pazarcık'ta Meydana Gelen Deprem Hk. 6 | Kahramanmaraş             | 1 | 0 | 0 | 1: 1529 | 1: 1541 |
| Kahramanmaraş-Pazarcık'ta Meydana Gelen Deprem Hk. 6 | Pazarcık                  | 0 | 1 | 0 | 1: 1529 | 1: 1541 |
| Kahramanmaraş-Pazarcık'ta Meydana Gelen Deprem Hk. 6 | Coordination\Coordination | 1 | 1 | 1 | 1: 1692 | 1: 1703 |
| Kahramanmaraş-Pazarcık'ta Meydana Gelen Deprem Hk. 6 | Coordination\Coordination | 1 | 1 | 1 | 1: 1692 | 1: 1703 |
| Kahramanmaraş-Pazarcık'ta Meydana Gelen Deprem Hk. 6 | Disaster                  | 1 | 1 | 1 | 1: 1845 | 1: 1848 |
| Kahramanmaraş-Pazarcık'ta Meydana Gelen Deprem Hk. 6 | Disaster                  | 1 | 1 | 1 | 1: 1845 | 1: 1848 |

|                                                      |                            |   |   |   |         |         |
|------------------------------------------------------|----------------------------|---|---|---|---------|---------|
| Kahramanmaraş-Pazarcık'ta Meydana Gelen Deprem Hk. 6 | Disaster                   | 1 | 1 | 1 | 1: 1864 | 1: 1867 |
| Kahramanmaraş-Pazarcık'ta Meydana Gelen Deprem Hk. 6 | Disaster                   | 1 | 1 | 1 | 1: 1864 | 1: 1867 |
| Kahramanmaraş-Pazarcık'ta Meydana Gelen Deprem Hk. 6 | Kahramanmaraş              | 1 | 0 | 0 | 1: 2200 | 1: 2212 |
| Kahramanmaraş-Pazarcık'ta Meydana Gelen Deprem Hk. 6 | Pazarcık                   | 0 | 1 | 0 | 1: 2200 | 1: 2212 |
| Kahramanmaraş-Pazarcık'ta Meydana Gelen Deprem Hk. 6 | Disaster                   | 1 | 1 | 1 | 1: 2308 | 1: 2311 |
| Kahramanmaraş-Pazarcık'ta Meydana Gelen Deprem Hk. 6 | Disaster                   | 1 | 1 | 1 | 1: 2308 | 1: 2311 |
| Kahramanmaraş-Pazarcık'ta Meydana Gelen Deprem Hk. 6 | Kahramanmaraş              | 1 | 0 | 0 | 1: 2331 | 1: 2343 |
| Kahramanmaraş-Pazarcık'ta Meydana Gelen Deprem Hk. 6 | Pazarcık                   | 0 | 1 | 0 | 1: 2331 | 1: 2343 |
| Kahramanmaraş-Pazarcık'ta Meydana Gelen Deprem Hk. 6 | Earthquake                 | 1 | 1 | 1 | 1: 2469 | 1: 2474 |
| Kahramanmaraş-Pazarcık'ta Meydana Gelen Deprem Hk. 6 | Earthquake                 | 1 | 1 | 1 | 1: 2469 | 1: 2474 |
| Kahramanmaraş-Pazarcık'ta Meydana Gelen Deprem Hk. 6 | Coordination\Communication | 1 | 1 | 1 | 1: 2768 | 1: 2775 |
| Kahramanmaraş-Pazarcık'ta Meydana Gelen Deprem Hk. 6 | Coordination\Communication | 1 | 1 | 1 | 1: 2768 | 1: 2775 |
| Kahramanmaraş-Pazarcık'ta Meydana Gelen Deprem Hk. 6 | Disaster                   | 1 | 1 | 1 | 1: 2809 | 1: 2812 |
| Kahramanmaraş-Pazarcık'ta Meydana Gelen Deprem Hk. 6 | Disaster                   | 1 | 1 | 1 | 1: 2809 | 1: 2812 |
| Kahramanmaraş-Pazarcık'ta Meydana Gelen Deprem Hk. 6 | Disaster                   | 1 | 1 | 1 | 1: 3126 | 1: 3129 |
| Kahramanmaraş-Pazarcık'ta Meydana Gelen Deprem Hk. 6 | Disaster                   | 1 | 1 | 1 | 1: 3126 | 1: 3129 |
| Kahramanmaraş-Pazarcık'ta Meydana Gelen Deprem Hk. 6 | Kahramanmaraş              | 1 | 0 | 0 | 2: 17   | 2: 29   |
| Kahramanmaraş-Pazarcık'ta Meydana Gelen Deprem Hk. 6 | Pazarcık                   | 0 | 1 | 0 | 2: 17   | 2: 29   |
| Kahramanmaraş-Pazarcık'ta Meydana Gelen Deprem Hk. 6 | Earthquake                 | 1 | 1 | 1 | 2: 57   | 2: 62   |
| Kahramanmaraş-Pazarcık'ta Meydana Gelen Deprem Hk. 6 | Earthquake                 | 1 | 1 | 1 | 2: 57   | 2: 62   |

|                                                      |                             |   |   |   |        |        |
|------------------------------------------------------|-----------------------------|---|---|---|--------|--------|
| Kahramanmaraş-Pazarcık'ta Meydana Gelen Deprem Hk. 6 | AFAD                        | 1 | 1 | 1 | 2: 97  | 2: 100 |
| Kahramanmaraş-Pazarcık'ta Meydana Gelen Deprem Hk. 6 | AFAD                        | 1 | 1 | 1 | 2: 97  | 2: 100 |
| Kahramanmaraş-Pazarcık'ta Meydana Gelen Deprem Hk. 6 | Earthquake                  | 1 | 1 | 1 | 2: 148 | 2: 153 |
| Kahramanmaraş-Pazarcık'ta Meydana Gelen Deprem Hk. 6 | Earthquake                  | 1 | 1 | 1 | 2: 148 | 2: 153 |
| Kahramanmaraş-Pazarcık'ta Meydana Gelen Deprem Hk. 6 | Response\Number of staff    | 1 | 0 | 0 | 2: 198 | 2: 220 |
| Kahramanmaraş-Pazarcık'ta Meydana Gelen Deprem Hk. 6 | Response\Search&Rescue      | 1 | 1 | 1 | 2: 198 | 2: 211 |
| Kahramanmaraş-Pazarcık'ta Meydana Gelen Deprem Hk. 6 | Response\Search&Rescue      | 1 | 1 | 1 | 2: 198 | 2: 211 |
| Kahramanmaraş-Pazarcık'ta Meydana Gelen Deprem Hk. 6 | Response\Number             | 0 | 1 | 0 | 2: 198 | 2: 220 |
| Kahramanmaraş-Pazarcık'ta Meydana Gelen Deprem Hk. 6 | Response\Coast guard&Navy   | 1 | 1 | 1 | 2: 251 | 2: 264 |
| Kahramanmaraş-Pazarcık'ta Meydana Gelen Deprem Hk. 6 | Response\Coast guard&Navy   | 1 | 1 | 1 | 2: 251 | 2: 264 |
| Kahramanmaraş-Pazarcık'ta Meydana Gelen Deprem Hk. 6 | Response\Number of staff    | 1 | 0 | 0 | 2: 515 | 2: 537 |
| Kahramanmaraş-Pazarcık'ta Meydana Gelen Deprem Hk. 6 | Response\Search&Rescue      | 1 | 1 | 1 | 2: 515 | 2: 528 |
| Kahramanmaraş-Pazarcık'ta Meydana Gelen Deprem Hk. 6 | Response\Search&Rescue      | 1 | 1 | 1 | 2: 515 | 2: 528 |
| Kahramanmaraş-Pazarcık'ta Meydana Gelen Deprem Hk. 6 | Response\Number             | 0 | 1 | 0 | 2: 515 | 2: 537 |
| Kahramanmaraş-Pazarcık'ta Meydana Gelen Deprem Hk. 6 | Shelter&meal\Mobile kitchen | 1 | 1 | 1 | 2: 638 | 2: 649 |
| Kahramanmaraş-Pazarcık'ta Meydana Gelen Deprem Hk. 6 | Shelter&meal\Mobile kitchen | 1 | 1 | 1 | 2: 638 | 2: 649 |
| Kahramanmaraş-Pazarcık'ta Meydana Gelen Deprem Hk. 6 | Shelter&meal\Mobile bakery  | 1 | 1 | 1 | 2: 656 | 2: 666 |
| Kahramanmaraş-Pazarcık'ta Meydana Gelen Deprem Hk. 6 | Shelter&meal\Mobile bakery  | 1 | 1 | 1 | 2: 656 | 2: 666 |
| Kahramanmaraş-Pazarcık'ta Meydana Gelen Deprem Hk. 6 | Kahramanmaraş               | 1 | 0 | 0 | 2: 668 | 2: 680 |
| Kahramanmaraş-Pazarcık'ta Meydana Gelen Deprem Hk. 6 | Pazarcık                    | 0 | 1 | 0 | 2: 668 | 2: 680 |

|                                                      |                             |   |   |   |         |         |
|------------------------------------------------------|-----------------------------|---|---|---|---------|---------|
| Kahramanmaraş-Pazarcık'ta Meydana Gelen Deprem Hk. 6 | Response\Military           | 1 | 1 | 1 | 2: 707  | 2: 714  |
| Kahramanmaraş-Pazarcık'ta Meydana Gelen Deprem Hk. 6 | Response\Military           | 1 | 1 | 1 | 2: 707  | 2: 714  |
| Kahramanmaraş-Pazarcık'ta Meydana Gelen Deprem Hk. 6 | Shelter&meal\Mobile kitchen | 1 | 1 | 1 | 2: 816  | 2: 827  |
| Kahramanmaraş-Pazarcık'ta Meydana Gelen Deprem Hk. 6 | Shelter&meal\Mobile kitchen | 1 | 1 | 1 | 2: 816  | 2: 827  |
| Kahramanmaraş-Pazarcık'ta Meydana Gelen Deprem Hk. 6 | Shelter&meal\Mobile bakery  | 1 | 1 | 1 | 2: 840  | 2: 850  |
| Kahramanmaraş-Pazarcık'ta Meydana Gelen Deprem Hk. 6 | Shelter&meal\Mobile bakery  | 1 | 1 | 1 | 2: 840  | 2: 850  |
| Kahramanmaraş-Pazarcık'ta Meydana Gelen Deprem Hk. 6 | Kahramanmaraş               | 1 | 0 | 0 | 2: 852  | 2: 864  |
| Kahramanmaraş-Pazarcık'ta Meydana Gelen Deprem Hk. 6 | Pazarcık                    | 0 | 1 | 0 | 2: 852  | 2: 864  |
| Kahramanmaraş-Pazarcık'ta Meydana Gelen Deprem Hk. 6 | Kahramanmaraş               | 1 | 0 | 0 | 2: 954  | 2: 966  |
| Kahramanmaraş-Pazarcık'ta Meydana Gelen Deprem Hk. 6 | Pazarcık                    | 0 | 1 | 0 | 2: 954  | 2: 966  |
| Kahramanmaraş-Pazarcık'ta Meydana Gelen Deprem Hk. 6 | Disaster                    | 1 | 1 | 1 | 2: 997  | 2: 1000 |
| Kahramanmaraş-Pazarcık'ta Meydana Gelen Deprem Hk. 6 | Disaster                    | 1 | 1 | 1 | 2: 997  | 2: 1000 |
| Kahramanmaraş-Pazarcık'ta Meydana Gelen Deprem Hk. 6 | Shelter&meal\Sheltering     | 1 | 1 | 1 | 2: 1002 | 2: 1008 |
| Kahramanmaraş-Pazarcık'ta Meydana Gelen Deprem Hk. 6 | Shelter&meal\Sheltering     | 1 | 1 | 1 | 2: 1002 | 2: 1008 |
| Kahramanmaraş-Pazarcık'ta Meydana Gelen Deprem Hk. 6 | Disaster                    | 1 | 1 | 1 | 2: 1221 | 2: 1224 |
| Kahramanmaraş-Pazarcık'ta Meydana Gelen Deprem Hk. 6 | Disaster                    | 1 | 1 | 1 | 2: 1221 | 2: 1224 |
| Kahramanmaraş-Pazarcık'ta Meydana Gelen Deprem Hk. 6 | Shelter&meal\Tent           | 1 | 1 | 1 | 2: 1277 | 2: 1281 |
| Kahramanmaraş-Pazarcık'ta Meydana Gelen Deprem Hk. 6 | Shelter&meal\Tent           | 1 | 1 | 1 | 2: 1277 | 2: 1281 |
| Kahramanmaraş-Pazarcık'ta Meydana Gelen Deprem Hk. 6 | Disaster                    | 1 | 1 | 1 | 2: 1364 | 2: 1367 |
| Kahramanmaraş-Pazarcık'ta Meydana Gelen Deprem Hk. 6 | Disaster                    | 1 | 1 | 1 | 2: 1364 | 2: 1367 |

|                                                      |                               |   |   |   |         |         |
|------------------------------------------------------|-------------------------------|---|---|---|---------|---------|
| Kahramanmaraş-Pazarcık'ta Meydana Gelen Deprem Hk. 6 | Shelter&meal\Mobile kitchen   | 1 | 1 | 1 | 2: 1422 | 2: 1433 |
| Kahramanmaraş-Pazarcık'ta Meydana Gelen Deprem Hk. 6 | Shelter&meal\Mobile kitchen   | 1 | 1 | 1 | 2: 1422 | 2: 1433 |
| Kahramanmaraş-Pazarcık'ta Meydana Gelen Deprem Hk. 6 | Shelter&meal\Mobile bakery    | 1 | 1 | 1 | 2: 1469 | 2: 1479 |
| Kahramanmaraş-Pazarcık'ta Meydana Gelen Deprem Hk. 6 | Shelter&meal\Mobile bakery    | 1 | 1 | 1 | 2: 1469 | 2: 1479 |
| Kahramanmaraş-Pazarcık'ta Meydana Gelen Deprem Hk. 6 | Disaster                      | 1 | 1 | 1 | 2: 1485 | 2: 1488 |
| Kahramanmaraş-Pazarcık'ta Meydana Gelen Deprem Hk. 6 | Disaster                      | 1 | 1 | 1 | 2: 1485 | 2: 1488 |
| Kahramanmaraş-Pazarcık'ta Meydana Gelen Deprem Hk. 6 | Response\Military             | 1 | 1 | 1 | 2: 1565 | 2: 1572 |
| Kahramanmaraş-Pazarcık'ta Meydana Gelen Deprem Hk. 6 | Response\Military             | 1 | 1 | 1 | 2: 1565 | 2: 1572 |
| Kahramanmaraş-Pazarcık'ta Meydana Gelen Deprem Hk. 6 | Shelter&meal\Mobile kitchen   | 1 | 1 | 1 | 2: 1580 | 2: 1591 |
| Kahramanmaraş-Pazarcık'ta Meydana Gelen Deprem Hk. 6 | Shelter&meal\Mobile kitchen   | 1 | 1 | 1 | 2: 1580 | 2: 1591 |
| Kahramanmaraş-Pazarcık'ta Meydana Gelen Deprem Hk. 6 | Shelter&meal\Mobile bakery    | 1 | 1 | 1 | 2: 1596 | 2: 1606 |
| Kahramanmaraş-Pazarcık'ta Meydana Gelen Deprem Hk. 6 | Shelter&meal\Mobile bakery    | 1 | 1 | 1 | 2: 1596 | 2: 1606 |
| Kahramanmaraş-Pazarcık'ta Meydana Gelen Deprem Hk. 6 | Shelter&meal\Mobile kitchen   | 1 | 1 | 1 | 2: 1664 | 2: 1675 |
| Kahramanmaraş-Pazarcık'ta Meydana Gelen Deprem Hk. 6 | Shelter&meal\Mobile kitchen   | 1 | 1 | 1 | 2: 1664 | 2: 1675 |
| Kahramanmaraş-Pazarcık'ta Meydana Gelen Deprem Hk. 6 | Disaster                      | 1 | 1 | 1 | 2: 1700 | 2: 1703 |
| Kahramanmaraş-Pazarcık'ta Meydana Gelen Deprem Hk. 6 | Disaster                      | 1 | 1 | 1 | 2: 1700 | 2: 1703 |
| Kahramanmaraş-Pazarcık'ta Meydana Gelen Deprem Hk. 6 | Response\Psychosocial support | 1 | 1 | 1 | 2: 1705 | 2: 1714 |
| Kahramanmaraş-Pazarcık'ta Meydana Gelen Deprem Hk. 6 | Response\Psychosocial support | 1 | 1 | 1 | 2: 1705 | 2: 1714 |
| Kahramanmaraş-Pazarcık'ta Meydana Gelen Deprem Hk. 6 | Response\Welfare service      | 1 | 1 | 1 | 2: 1738 | 2: 1750 |
| Kahramanmaraş-Pazarcık'ta Meydana Gelen Deprem Hk. 6 | Response\Welfare service      | 1 | 1 | 1 | 2: 1738 | 2: 1750 |



|                                                      |                                 |   |   |   |         |         |
|------------------------------------------------------|---------------------------------|---|---|---|---------|---------|
| Kahramanmaraş-Pazarcık'ta Meydana Gelen Deprem Hk. 6 | Kahramanmaraş                   | 1 | 0 | 0 | 2: 1761 | 2: 1773 |
| Kahramanmaraş-Pazarcık'ta Meydana Gelen Deprem Hk. 6 | Pazarcık                        | 0 | 1 | 0 | 2: 1761 | 2: 1773 |
| Kahramanmaraş-Pazarcık'ta Meydana Gelen Deprem Hk. 6 | Disaster                        | 1 | 1 | 1 | 2: 1884 | 2: 1887 |
| Kahramanmaraş-Pazarcık'ta Meydana Gelen Deprem Hk. 6 | Disaster                        | 1 | 1 | 1 | 2: 1884 | 2: 1887 |
| Kahramanmaraş-Pazarcık'ta Meydana Gelen Deprem Hk. 6 | Kahramanmaraş                   | 1 | 0 | 0 | 2: 1911 | 2: 1923 |
| Kahramanmaraş-Pazarcık'ta Meydana Gelen Deprem Hk. 6 | Pazarcık                        | 0 | 1 | 0 | 2: 1911 | 2: 1923 |
| Kahramanmaraş-Pazarcık'ta Meydana Gelen Deprem Hk. 6 | Disaster                        | 1 | 1 | 1 | 2: 2069 | 2: 2072 |
| Kahramanmaraş-Pazarcık'ta Meydana Gelen Deprem Hk. 6 | Disaster                        | 1 | 1 | 1 | 2: 2069 | 2: 2072 |
| Kahramanmaraş-Pazarcık'ta Meydana Gelen Deprem Hk. 6 | Disaster                        | 1 | 1 | 1 | 2: 2090 | 2: 2093 |
| Kahramanmaraş-Pazarcık'ta Meydana Gelen Deprem Hk. 6 | Disaster                        | 1 | 1 | 1 | 2: 2090 | 2: 2093 |
| Kahramanmaraş-Pazarcık'ta Meydana Gelen Deprem Hk. 6 | Coordination\Coordination       | 1 | 1 | 1 | 2: 2149 | 2: 2160 |
| Kahramanmaraş-Pazarcık'ta Meydana Gelen Deprem Hk. 6 | Coordination\Coordination       | 1 | 1 | 1 | 2: 2149 | 2: 2160 |
| Kahramanmaraş-Pazarcık'ta Meydana Gelen Deprem Hk. 6 | Coordination\Social media       | 1 | 0 | 0 | 2: 2291 | 2: 2302 |
| Kahramanmaraş-Pazarcık'ta Meydana Gelen Deprem Hk. 6 | Coordination\Social media usage | 0 | 1 | 0 | 2: 2291 | 2: 2302 |
| Kahramanmaraş-Pazarcık'ta Meydana Gelen Deprem Hk. 6 | Coordination\Disinformation     | 1 | 1 | 1 | 2: 2362 | 2: 2375 |
| Kahramanmaraş-Pazarcık'ta Meydana Gelen Deprem Hk. 6 | Coordination\Disinformation     | 1 | 1 | 1 | 2: 2362 | 2: 2375 |
| Kahramanmaraş-Pazarcık'ta Meydana Gelen Deprem Hk. 6 | Disaster                        | 1 | 1 | 1 | 2: 2726 | 2: 2729 |
| Kahramanmaraş-Pazarcık'ta Meydana Gelen Deprem Hk. 6 | Disaster                        | 1 | 1 | 1 | 2: 2726 | 2: 2729 |
| Kahramanmaraş-Pazarcık'ta Meydana Gelen Deprem Hk. 6 | Coordination\Public relations   | 1 | 1 | 1 | 2: 2885 | 2: 2890 |
| Kahramanmaraş-Pazarcık'ta Meydana Gelen Deprem Hk. 6 | Coordination\Public relations   | 1 | 1 | 1 | 2: 2885 | 2: 2890 |

|                                                             |                        |   |   |   |         |         |
|-------------------------------------------------------------|------------------------|---|---|---|---------|---------|
| Kahramanmaraş-<br>Pazarcık'ta Meydana<br>Gelen Deprem Hk. 6 | AFAD                   | 1 | 1 | 1 | 2: 2925 | 2: 2928 |
| Kahramanmaraş-<br>Pazarcık'ta Meydana<br>Gelen Deprem Hk. 6 | AFAD                   | 1 | 1 | 1 | 2: 2925 | 2: 2928 |
| Kahramanmaraş-<br>Pazarcık'ta Meydana<br>Gelen Deprem Hk. 6 | Response\Search&Rescue | 1 | 1 | 1 | 2: 3067 | 2: 3080 |
| Kahramanmaraş-<br>Pazarcık'ta Meydana<br>Gelen Deprem Hk. 6 | Response\Search&Rescue | 1 | 1 | 1 | 2: 3067 | 2: 3080 |
| Kahramanmaraş-<br>Pazarcık'ta Meydana<br>Gelen Deprem Hk. 6 | Disaster               | 1 | 1 | 1 | 2: 3131 | 2: 3134 |
| Kahramanmaraş-<br>Pazarcık'ta Meydana<br>Gelen Deprem Hk. 6 | Disaster               | 1 | 1 | 1 | 2: 3131 | 2: 3134 |
| Kahramanmaraş-<br>Pazarcık'ta Meydana<br>Gelen Deprem Hk. 6 | AFAD                   | 1 | 1 | 1 | 2: 3149 | 2: 3152 |
| Kahramanmaraş-<br>Pazarcık'ta Meydana<br>Gelen Deprem Hk. 6 | AFAD                   | 1 | 1 | 1 | 2: 3149 | 2: 3152 |
| Kahramanmaraş-<br>Pazarcık'ta Meydana<br>Gelen Deprem Hk. 6 | Recovery\Fund drive    | 1 | 1 | 1 | 2: 3209 | 2: 3227 |
| Kahramanmaraş-<br>Pazarcık'ta Meydana<br>Gelen Deprem Hk. 6 | Recovery\Fund drive    | 1 | 1 | 1 | 2: 3209 | 2: 3227 |
| Kahramanmaraş-<br>Pazarcık'ta Meydana<br>Gelen Deprem Hk. 6 | Kahramanmaraş          | 1 | 0 | 0 | 3: 17   | 3: 29   |
| Kahramanmaraş-<br>Pazarcık'ta Meydana<br>Gelen Deprem Hk. 6 | Pazarcık               | 0 | 1 | 0 | 3: 17   | 3: 29   |
| Kahramanmaraş-<br>Pazarcık'ta Meydana<br>Gelen Deprem Hk. 6 | Earthquake             | 1 | 1 | 1 | 3: 57   | 3: 62   |
| Kahramanmaraş-<br>Pazarcık'ta Meydana<br>Gelen Deprem Hk. 6 | Earthquake             | 1 | 1 | 1 | 3: 57   | 3: 62   |
| Kahramanmaraş-<br>Pazarcık'ta Meydana<br>Gelen Deprem Hk. 6 | AFAD                   | 1 | 1 | 1 | 3: 97   | 3: 100  |
| Kahramanmaraş-<br>Pazarcık'ta Meydana<br>Gelen Deprem Hk. 6 | AFAD                   | 1 | 1 | 1 | 3: 97   | 3: 100  |
| Kahramanmaraş-<br>Pazarcık'ta Meydana<br>Gelen Deprem Hk. 6 | Earthquake             | 1 | 1 | 1 | 3: 148  | 3: 153  |
| Kahramanmaraş-<br>Pazarcık'ta Meydana<br>Gelen Deprem Hk. 6 | Earthquake             | 1 | 1 | 1 | 3: 148  | 3: 153  |
| Kahramanmaraş-<br>Pazarcık'ta Meydana<br>Gelen Deprem Hk. 6 | AFAD                   | 1 | 1 | 1 | 3: 178  | 3: 181  |
| Kahramanmaraş-<br>Pazarcık'ta Meydana<br>Gelen Deprem Hk. 6 | AFAD                   | 1 | 1 | 1 | 3: 178  | 3: 181  |

|                                                             |                                 |   |   |   |        |        |
|-------------------------------------------------------------|---------------------------------|---|---|---|--------|--------|
| Kahramanmaraş-<br>Pazarcık'ta Meydana<br>Gelen Deprem Hk. 6 | AFAD                            | 1 | 1 | 1 | 3: 295 | 3: 298 |
| Kahramanmaraş-<br>Pazarcık'ta Meydana<br>Gelen Deprem Hk. 6 | AFAD                            | 1 | 1 | 1 | 3: 295 | 3: 298 |
| Kahramanmaraş-<br>Pazarcık'ta Meydana<br>Gelen Deprem Hk. 6 | Preparedness\Preparedness       | 1 | 1 | 1 | 3: 338 | 3: 348 |
| Kahramanmaraş-<br>Pazarcık'ta Meydana<br>Gelen Deprem Hk. 6 | Preparedness\Preparedness       | 1 | 1 | 1 | 3: 338 | 3: 348 |
| Kahramanmaraş-<br>Pazarcık'ta Meydana<br>Gelen Deprem Hk. 6 | Disaster                        | 1 | 1 | 1 | 3: 338 | 3: 341 |
| Kahramanmaraş-<br>Pazarcık'ta Meydana<br>Gelen Deprem Hk. 6 | Disaster                        | 1 | 1 | 1 | 3: 338 | 3: 341 |
| Kahramanmaraş-<br>Pazarcık'ta Meydana<br>Gelen Deprem Hk. 6 | Disaster                        | 1 | 1 | 1 | 3: 386 | 3: 389 |
| Kahramanmaraş-<br>Pazarcık'ta Meydana<br>Gelen Deprem Hk. 6 | Disaster                        | 1 | 1 | 1 | 3: 386 | 3: 389 |
| Kahramanmaraş-<br>Pazarcık'ta Meydana<br>Gelen Deprem Hk. 6 | Coordination\Social media       | 1 | 0 | 0 | 3: 494 | 3: 505 |
| Kahramanmaraş-<br>Pazarcık'ta Meydana<br>Gelen Deprem Hk. 6 | Coordination\Social media usage | 0 | 1 | 0 | 3: 494 | 3: 505 |
| Kahramanmaraş-<br>Pazarcık'ta Meydana<br>Gelen Deprem Hk. 6 | AFAD                            | 1 | 1 | 1 | 3: 550 | 3: 553 |
| Kahramanmaraş-<br>Pazarcık'ta Meydana<br>Gelen Deprem Hk. 6 | AFAD                            | 1 | 1 | 1 | 3: 550 | 3: 553 |
| Kahramanmaraş-<br>Pazarcık'ta Meydana<br>Gelen Deprem Hk. 6 | AFAD                            | 1 | 1 | 1 | 3: 572 | 3: 575 |
| Kahramanmaraş-<br>Pazarcık'ta Meydana<br>Gelen Deprem Hk. 6 | AFAD                            | 1 | 1 | 1 | 3: 572 | 3: 575 |
| Kahramanmaraş-<br>Pazarcık'ta Meydana<br>Gelen Deprem Hk. 6 | Coordination\Information        | 1 | 1 | 1 | 3: 617 | 3: 628 |
| Kahramanmaraş-<br>Pazarcık'ta Meydana<br>Gelen Deprem Hk. 6 | Coordination\Information        | 1 | 1 | 1 | 3: 617 | 3: 628 |
| Kahramanmaraş-<br>Pazarcık'ta Meydana<br>Gelen Deprem Hk. 6 | Recovery\Peacemaking            | 1 | 1 | 1 | 3: 633 | 3: 642 |
| Kahramanmaraş-<br>Pazarcık'ta Meydana<br>Gelen Deprem Hk. 6 | Recovery\Peacemaking            | 1 | 1 | 1 | 3: 633 | 3: 642 |
| Kahramanmaraş-<br>Pazarcık'ta Meydana<br>Gelen Deprem Hk. 6 | Coordination\Social media       | 1 | 0 | 0 | 3: 689 | 3: 700 |
| Kahramanmaraş-<br>Pazarcık'ta Meydana<br>Gelen Deprem Hk. 6 | Coordination\Social media usage | 0 | 1 | 0 | 3: 689 | 3: 700 |

|                                                             |               |   |   |   |        |        |
|-------------------------------------------------------------|---------------|---|---|---|--------|--------|
| Kahramanmaraş-<br>Pazarcık'ta Meydana<br>Gelen Deprem Hk. 6 | Disaster      | 1 | 1 | 1 | 3: 791 | 3: 794 |
| Kahramanmaraş-<br>Pazarcık'ta Meydana<br>Gelen Deprem Hk. 6 | Disaster      | 1 | 1 | 1 | 3: 791 | 3: 794 |
| Kahramanmaraş-<br>Pazarcık'ta Meydana<br>Gelen Deprem Hk. 6 | Emergency     | 1 | 1 | 1 | 3: 799 | 3: 808 |
| Kahramanmaraş-<br>Pazarcık'ta Meydana<br>Gelen Deprem Hk. 6 | Emergency     | 1 | 1 | 1 | 3: 799 | 3: 808 |
| Kahramanmaraş-<br>Pazarcık'ta Meydana<br>Gelen Deprem Hk. 7 | Kahramanmaraş | 1 | 0 | 0 | 1: 17  | 1: 29  |
| Kahramanmaraş-<br>Pazarcık'ta Meydana<br>Gelen Deprem Hk. 7 | Pazarcık      | 0 | 1 | 0 | 1: 17  | 1: 29  |
| Kahramanmaraş-<br>Pazarcık'ta Meydana<br>Gelen Deprem Hk. 7 | Earthquake    | 1 | 1 | 1 | 1: 57  | 1: 62  |
| Kahramanmaraş-<br>Pazarcık'ta Meydana<br>Gelen Deprem Hk. 7 | Earthquake    | 1 | 1 | 1 | 1: 57  | 1: 62  |
| Kahramanmaraş-<br>Pazarcık'ta Meydana<br>Gelen Deprem Hk. 7 | AFAD          | 1 | 1 | 1 | 1: 97  | 1: 100 |
| Kahramanmaraş-<br>Pazarcık'ta Meydana<br>Gelen Deprem Hk. 7 | AFAD          | 1 | 1 | 1 | 1: 97  | 1: 100 |
| Kahramanmaraş-<br>Pazarcık'ta Meydana<br>Gelen Deprem Hk. 7 | Earthquake    | 1 | 1 | 1 | 1: 148 | 1: 153 |
| Kahramanmaraş-<br>Pazarcık'ta Meydana<br>Gelen Deprem Hk. 7 | Earthquake    | 1 | 1 | 1 | 1: 148 | 1: 153 |
| Kahramanmaraş-<br>Pazarcık'ta Meydana<br>Gelen Deprem Hk. 7 | Kahramanmaraş | 1 | 0 | 0 | 1: 178 | 1: 190 |
| Kahramanmaraş-<br>Pazarcık'ta Meydana<br>Gelen Deprem Hk. 7 | Pazarcık      | 0 | 1 | 0 | 1: 178 | 1: 190 |
| Kahramanmaraş-<br>Pazarcık'ta Meydana<br>Gelen Deprem Hk. 7 | Earthquake    | 1 | 1 | 1 | 1: 218 | 1: 223 |
| Kahramanmaraş-<br>Pazarcık'ta Meydana<br>Gelen Deprem Hk. 7 | Earthquake    | 1 | 1 | 1 | 1: 218 | 1: 223 |
| Kahramanmaraş-<br>Pazarcık'ta Meydana<br>Gelen Deprem Hk. 7 | Kahramanmaraş | 1 | 0 | 0 | 1: 296 | 1: 308 |
| Kahramanmaraş-<br>Pazarcık'ta Meydana<br>Gelen Deprem Hk. 7 | Pazarcık      | 0 | 1 | 0 | 1: 296 | 1: 308 |
| Kahramanmaraş-<br>Pazarcık'ta Meydana<br>Gelen Deprem Hk. 7 | Earthquake    | 1 | 1 | 1 | 1: 336 | 1: 341 |
| Kahramanmaraş-<br>Pazarcık'ta Meydana<br>Gelen Deprem Hk. 7 | Earthquake    | 1 | 1 | 1 | 1: 336 | 1: 341 |

|                                                      |                           |   |   |   |         |         |
|------------------------------------------------------|---------------------------|---|---|---|---------|---------|
| Kahramanmaraş-Pazarcık'ta Meydana Gelen Deprem Hk. 7 | Kahramanmaraş             | 1 | 0 | 0 | 1: 404  | 1: 416  |
| Kahramanmaraş-Pazarcık'ta Meydana Gelen Deprem Hk. 7 | Pazarcık                  | 0 | 1 | 0 | 1: 404  | 1: 416  |
| Kahramanmaraş-Pazarcık'ta Meydana Gelen Deprem Hk. 7 | Earthquake                | 1 | 1 | 1 | 1: 462  | 1: 467  |
| Kahramanmaraş-Pazarcık'ta Meydana Gelen Deprem Hk. 7 | Earthquake                | 1 | 1 | 1 | 1: 462  | 1: 467  |
| Kahramanmaraş-Pazarcık'ta Meydana Gelen Deprem Hk. 7 | Earthquake                | 1 | 1 | 1 | 1: 549  | 1: 554  |
| Kahramanmaraş-Pazarcık'ta Meydana Gelen Deprem Hk. 7 | Earthquake                | 1 | 1 | 1 | 1: 549  | 1: 554  |
| Kahramanmaraş-Pazarcık'ta Meydana Gelen Deprem Hk. 7 | Kahramanmaraş             | 1 | 0 | 0 | 1: 631  | 1: 643  |
| Kahramanmaraş-Pazarcık'ta Meydana Gelen Deprem Hk. 7 | Pazarcık                  | 0 | 1 | 0 | 1: 631  | 1: 643  |
| Kahramanmaraş-Pazarcık'ta Meydana Gelen Deprem Hk. 7 | Response\Number of staff  | 1 | 0 | 0 | 1: 871  | 1: 885  |
| Kahramanmaraş-Pazarcık'ta Meydana Gelen Deprem Hk. 7 | Response\Number           | 0 | 1 | 0 | 1: 871  | 1: 885  |
| Kahramanmaraş-Pazarcık'ta Meydana Gelen Deprem Hk. 7 | AFAD                      | 1 | 1 | 1 | 1: 1217 | 1: 1220 |
| Kahramanmaraş-Pazarcık'ta Meydana Gelen Deprem Hk. 7 | AFAD                      | 1 | 1 | 1 | 1: 1217 | 1: 1220 |
| Kahramanmaraş-Pazarcık'ta Meydana Gelen Deprem Hk. 7 | Kahramanmaraş             | 1 | 0 | 0 | 1: 1337 | 1: 1349 |
| Kahramanmaraş-Pazarcık'ta Meydana Gelen Deprem Hk. 7 | Pazarcık                  | 0 | 1 | 0 | 1: 1337 | 1: 1349 |
| Kahramanmaraş-Pazarcık'ta Meydana Gelen Deprem Hk. 7 | Coordination\Coordination | 1 | 1 | 1 | 1: 1500 | 1: 1511 |
| Kahramanmaraş-Pazarcık'ta Meydana Gelen Deprem Hk. 7 | Coordination\Coordination | 1 | 1 | 1 | 1: 1500 | 1: 1511 |
| Kahramanmaraş-Pazarcık'ta Meydana Gelen Deprem Hk. 7 | Disaster                  | 1 | 1 | 1 | 1: 1653 | 1: 1656 |
| Kahramanmaraş-Pazarcık'ta Meydana Gelen Deprem Hk. 7 | Disaster                  | 1 | 1 | 1 | 1: 1653 | 1: 1656 |
| Kahramanmaraş-Pazarcık'ta Meydana Gelen Deprem Hk. 7 | Disaster                  | 1 | 1 | 1 | 1: 1672 | 1: 1675 |
| Kahramanmaraş-Pazarcık'ta Meydana Gelen Deprem Hk. 7 | Disaster                  | 1 | 1 | 1 | 1: 1672 | 1: 1675 |

|                                                      |                            |   |   |   |         |         |
|------------------------------------------------------|----------------------------|---|---|---|---------|---------|
| Kahramanmaraş-Pazarcık'ta Meydana Gelen Deprem Hk. 7 | Kahramanmaraş              | 1 | 0 | 0 | 1: 2008 | 1: 2020 |
| Kahramanmaraş-Pazarcık'ta Meydana Gelen Deprem Hk. 7 | Pazarcık                   | 0 | 1 | 0 | 1: 2008 | 1: 2020 |
| Kahramanmaraş-Pazarcık'ta Meydana Gelen Deprem Hk. 7 | Disaster                   | 1 | 1 | 1 | 1: 2116 | 1: 2119 |
| Kahramanmaraş-Pazarcık'ta Meydana Gelen Deprem Hk. 7 | Disaster                   | 1 | 1 | 1 | 1: 2116 | 1: 2119 |
| Kahramanmaraş-Pazarcık'ta Meydana Gelen Deprem Hk. 7 | Kahramanmaraş              | 1 | 0 | 0 | 1: 2139 | 1: 2151 |
| Kahramanmaraş-Pazarcık'ta Meydana Gelen Deprem Hk. 7 | Pazarcık                   | 0 | 1 | 0 | 1: 2139 | 1: 2151 |
| Kahramanmaraş-Pazarcık'ta Meydana Gelen Deprem Hk. 7 | Earthquake                 | 1 | 1 | 1 | 1: 2277 | 1: 2282 |
| Kahramanmaraş-Pazarcık'ta Meydana Gelen Deprem Hk. 7 | Earthquake                 | 1 | 1 | 1 | 1: 2277 | 1: 2282 |
| Kahramanmaraş-Pazarcık'ta Meydana Gelen Deprem Hk. 7 | Coordination\Communication | 1 | 1 | 1 | 1: 2576 | 1: 2583 |
| Kahramanmaraş-Pazarcık'ta Meydana Gelen Deprem Hk. 7 | Coordination\Communication | 1 | 1 | 1 | 1: 2576 | 1: 2583 |
| Kahramanmaraş-Pazarcık'ta Meydana Gelen Deprem Hk. 7 | Disaster                   | 1 | 1 | 1 | 1: 2617 | 1: 2620 |
| Kahramanmaraş-Pazarcık'ta Meydana Gelen Deprem Hk. 7 | Disaster                   | 1 | 1 | 1 | 1: 2617 | 1: 2620 |
| Kahramanmaraş-Pazarcık'ta Meydana Gelen Deprem Hk. 7 | Disaster                   | 1 | 1 | 1 | 1: 2934 | 1: 2937 |
| Kahramanmaraş-Pazarcık'ta Meydana Gelen Deprem Hk. 7 | Disaster                   | 1 | 1 | 1 | 1: 2934 | 1: 2937 |
| Kahramanmaraş-Pazarcık'ta Meydana Gelen Deprem Hk. 7 | Response\Number of staff   | 1 | 0 | 0 | 1: 2984 | 1: 3006 |
| Kahramanmaraş-Pazarcık'ta Meydana Gelen Deprem Hk. 7 | Response\Search&Rescue     | 1 | 1 | 1 | 1: 2984 | 1: 2997 |
| Kahramanmaraş-Pazarcık'ta Meydana Gelen Deprem Hk. 7 | Response\Search&Rescue     | 1 | 1 | 1 | 1: 2984 | 1: 2997 |
| Kahramanmaraş-Pazarcık'ta Meydana Gelen Deprem Hk. 7 | Response\Number            | 0 | 1 | 0 | 1: 2984 | 1: 3006 |
| Kahramanmaraş-Pazarcık'ta Meydana Gelen Deprem Hk. 7 | Kahramanmaraş              | 1 | 0 | 0 | 2: 17   | 2: 29   |
| Kahramanmaraş-Pazarcık'ta Meydana Gelen Deprem Hk. 7 | Pazarcık                   | 0 | 1 | 0 | 2: 17   | 2: 29   |

|                                                      |                           |   |   |   |        |        |
|------------------------------------------------------|---------------------------|---|---|---|--------|--------|
| Kahramanmaraş-Pazarcık'ta Meydana Gelen Deprem Hk. 7 | Earthquake                | 1 | 1 | 1 | 2: 57  | 2: 62  |
| Kahramanmaraş-Pazarcık'ta Meydana Gelen Deprem Hk. 7 | Earthquake                | 1 | 1 | 1 | 2: 57  | 2: 62  |
| Kahramanmaraş-Pazarcık'ta Meydana Gelen Deprem Hk. 7 | AFAD                      | 1 | 1 | 1 | 2: 97  | 2: 100 |
| Kahramanmaraş-Pazarcık'ta Meydana Gelen Deprem Hk. 7 | AFAD                      | 1 | 1 | 1 | 2: 97  | 2: 100 |
| Kahramanmaraş-Pazarcık'ta Meydana Gelen Deprem Hk. 7 | Earthquake                | 1 | 1 | 1 | 2: 148 | 2: 153 |
| Kahramanmaraş-Pazarcık'ta Meydana Gelen Deprem Hk. 7 | Earthquake                | 1 | 1 | 1 | 2: 148 | 2: 153 |
| Kahramanmaraş-Pazarcık'ta Meydana Gelen Deprem Hk. 7 | Response\Coast guard&Navy | 1 | 1 | 1 | 2: 178 | 2: 191 |
| Kahramanmaraş-Pazarcık'ta Meydana Gelen Deprem Hk. 7 | Response\Coast guard&Navy | 1 | 1 | 1 | 2: 178 | 2: 191 |
| Kahramanmaraş-Pazarcık'ta Meydana Gelen Deprem Hk. 7 | Response\Number of staff  | 1 | 0 | 0 | 2: 442 | 2: 464 |
| Kahramanmaraş-Pazarcık'ta Meydana Gelen Deprem Hk. 7 | Response\Search&Rescue    | 1 | 1 | 1 | 2: 442 | 2: 455 |
| Kahramanmaraş-Pazarcık'ta Meydana Gelen Deprem Hk. 7 | Response\Search&Rescue    | 1 | 1 | 1 | 2: 442 | 2: 455 |
| Kahramanmaraş-Pazarcık'ta Meydana Gelen Deprem Hk. 7 | Response\Number           | 0 | 1 | 0 | 2: 442 | 2: 464 |
| Kahramanmaraş-Pazarcık'ta Meydana Gelen Deprem Hk. 7 | Kahramanmaraş             | 1 | 0 | 0 | 2: 562 | 2: 574 |
| Kahramanmaraş-Pazarcık'ta Meydana Gelen Deprem Hk. 7 | Pazarcık                  | 0 | 1 | 0 | 2: 562 | 2: 574 |
| Kahramanmaraş-Pazarcık'ta Meydana Gelen Deprem Hk. 7 | Response\Military         | 1 | 1 | 1 | 2: 600 | 2: 607 |
| Kahramanmaraş-Pazarcık'ta Meydana Gelen Deprem Hk. 7 | Response\Military         | 1 | 1 | 1 | 2: 600 | 2: 607 |
| Kahramanmaraş-Pazarcık'ta Meydana Gelen Deprem Hk. 7 | Kahramanmaraş             | 1 | 0 | 0 | 2: 707 | 2: 719 |
| Kahramanmaraş-Pazarcık'ta Meydana Gelen Deprem Hk. 7 | Pazarcık                  | 0 | 1 | 0 | 2: 707 | 2: 719 |
| Kahramanmaraş-Pazarcık'ta Meydana Gelen Deprem Hk. 7 | Kahramanmaraş             | 1 | 0 | 0 | 2: 808 | 2: 820 |
| Kahramanmaraş-Pazarcık'ta Meydana Gelen Deprem Hk. 7 | Pazarcık                  | 0 | 1 | 0 | 2: 808 | 2: 820 |

|                                                      |                             |   |   |   |         |         |
|------------------------------------------------------|-----------------------------|---|---|---|---------|---------|
| Kahramanmaraş-Pazarcık'ta Meydana Gelen Deprem Hk. 7 | Response\Military           | 1 | 1 | 1 | 2: 886  | 2: 893  |
| Kahramanmaraş-Pazarcık'ta Meydana Gelen Deprem Hk. 7 | Response\Military           | 1 | 1 | 1 | 2: 886  | 2: 893  |
| Kahramanmaraş-Pazarcık'ta Meydana Gelen Deprem Hk. 7 | Disaster                    | 1 | 1 | 1 | 2: 1110 | 2: 1113 |
| Kahramanmaraş-Pazarcık'ta Meydana Gelen Deprem Hk. 7 | Disaster                    | 1 | 1 | 1 | 2: 1110 | 2: 1113 |
| Kahramanmaraş-Pazarcık'ta Meydana Gelen Deprem Hk. 7 | Shelter&meal\Sheltering     | 1 | 1 | 1 | 2: 1115 | 2: 1121 |
| Kahramanmaraş-Pazarcık'ta Meydana Gelen Deprem Hk. 7 | Shelter&meal\Sheltering     | 1 | 1 | 1 | 2: 1115 | 2: 1121 |
| Kahramanmaraş-Pazarcık'ta Meydana Gelen Deprem Hk. 7 | Disaster                    | 1 | 1 | 1 | 2: 1334 | 2: 1337 |
| Kahramanmaraş-Pazarcık'ta Meydana Gelen Deprem Hk. 7 | Disaster                    | 1 | 1 | 1 | 2: 1334 | 2: 1337 |
| Kahramanmaraş-Pazarcık'ta Meydana Gelen Deprem Hk. 7 | Shelter&meal\Tent           | 1 | 1 | 1 | 2: 1391 | 2: 1395 |
| Kahramanmaraş-Pazarcık'ta Meydana Gelen Deprem Hk. 7 | Shelter&meal\Tent           | 1 | 1 | 1 | 2: 1391 | 2: 1395 |
| Kahramanmaraş-Pazarcık'ta Meydana Gelen Deprem Hk. 7 | Disaster                    | 1 | 1 | 1 | 2: 1481 | 2: 1484 |
| Kahramanmaraş-Pazarcık'ta Meydana Gelen Deprem Hk. 7 | Disaster                    | 1 | 1 | 1 | 2: 1481 | 2: 1484 |
| Kahramanmaraş-Pazarcık'ta Meydana Gelen Deprem Hk. 7 | Shelter&meal\Mobile kitchen | 1 | 1 | 1 | 2: 1539 | 2: 1550 |
| Kahramanmaraş-Pazarcık'ta Meydana Gelen Deprem Hk. 7 | Shelter&meal\Mobile kitchen | 1 | 1 | 1 | 2: 1539 | 2: 1550 |
| Kahramanmaraş-Pazarcık'ta Meydana Gelen Deprem Hk. 7 | Shelter&meal\Mobile bakery  | 1 | 1 | 1 | 2: 1586 | 2: 1596 |
| Kahramanmaraş-Pazarcık'ta Meydana Gelen Deprem Hk. 7 | Shelter&meal\Mobile bakery  | 1 | 1 | 1 | 2: 1586 | 2: 1596 |
| Kahramanmaraş-Pazarcık'ta Meydana Gelen Deprem Hk. 7 | Response\Military           | 1 | 1 | 1 | 2: 1645 | 2: 1652 |
| Kahramanmaraş-Pazarcık'ta Meydana Gelen Deprem Hk. 7 | Response\Military           | 1 | 1 | 1 | 2: 1645 | 2: 1652 |
| Kahramanmaraş-Pazarcık'ta Meydana Gelen Deprem Hk. 7 | Shelter&meal\Mobile kitchen | 1 | 1 | 1 | 2: 1660 | 2: 1671 |
| Kahramanmaraş-Pazarcık'ta Meydana Gelen Deprem Hk. 7 | Shelter&meal\Mobile kitchen | 1 | 1 | 1 | 2: 1660 | 2: 1671 |



|                                                      |                               |   |   |   |         |         |
|------------------------------------------------------|-------------------------------|---|---|---|---------|---------|
| Kahramanmaraş-Pazarcık'ta Meydana Gelen Deprem Hk. 7 | Shelter&meal\Mobile bakery    | 1 | 1 | 1 | 2: 1676 | 2: 1686 |
| Kahramanmaraş-Pazarcık'ta Meydana Gelen Deprem Hk. 7 | Shelter&meal\Mobile bakery    | 1 | 1 | 1 | 2: 1676 | 2: 1686 |
| Kahramanmaraş-Pazarcık'ta Meydana Gelen Deprem Hk. 7 | Shelter&meal\Mobile kitchen   | 1 | 1 | 1 | 2: 1744 | 2: 1755 |
| Kahramanmaraş-Pazarcık'ta Meydana Gelen Deprem Hk. 7 | Shelter&meal\Mobile kitchen   | 1 | 1 | 1 | 2: 1744 | 2: 1755 |
| Kahramanmaraş-Pazarcık'ta Meydana Gelen Deprem Hk. 7 | Shelter&meal\Hot meal         | 1 | 1 | 1 | 2: 1924 | 2: 1934 |
| Kahramanmaraş-Pazarcık'ta Meydana Gelen Deprem Hk. 7 | Shelter&meal\Hot meal         | 1 | 1 | 1 | 2: 1924 | 2: 1934 |
| Kahramanmaraş-Pazarcık'ta Meydana Gelen Deprem Hk. 7 | Disaster                      | 1 | 1 | 1 | 2: 1952 | 2: 1955 |
| Kahramanmaraş-Pazarcık'ta Meydana Gelen Deprem Hk. 7 | Disaster                      | 1 | 1 | 1 | 2: 1952 | 2: 1955 |
| Kahramanmaraş-Pazarcık'ta Meydana Gelen Deprem Hk. 7 | Response\Psychosocial support | 1 | 1 | 1 | 2: 1957 | 2: 1966 |
| Kahramanmaraş-Pazarcık'ta Meydana Gelen Deprem Hk. 7 | Response\Psychosocial support | 1 | 1 | 1 | 2: 1957 | 2: 1966 |
| Kahramanmaraş-Pazarcık'ta Meydana Gelen Deprem Hk. 7 | Response\Welfare service      | 1 | 1 | 1 | 2: 1990 | 2: 2002 |
| Kahramanmaraş-Pazarcık'ta Meydana Gelen Deprem Hk. 7 | Response\Welfare service      | 1 | 1 | 1 | 2: 1990 | 2: 2002 |
| Kahramanmaraş-Pazarcık'ta Meydana Gelen Deprem Hk. 7 | Kahramanmaraş                 | 1 | 0 | 0 | 2: 2013 | 2: 2025 |
| Kahramanmaraş-Pazarcık'ta Meydana Gelen Deprem Hk. 7 | Pazarcık                      | 0 | 1 | 0 | 2: 2013 | 2: 2025 |
| Kahramanmaraş-Pazarcık'ta Meydana Gelen Deprem Hk. 7 | Disaster                      | 1 | 1 | 1 | 2: 2136 | 2: 2139 |
| Kahramanmaraş-Pazarcık'ta Meydana Gelen Deprem Hk. 7 | Disaster                      | 1 | 1 | 1 | 2: 2136 | 2: 2139 |
| Kahramanmaraş-Pazarcık'ta Meydana Gelen Deprem Hk. 7 | Kahramanmaraş                 | 1 | 0 | 0 | 2: 2319 | 2: 2331 |
| Kahramanmaraş-Pazarcık'ta Meydana Gelen Deprem Hk. 7 | Pazarcık                      | 0 | 1 | 0 | 2: 2319 | 2: 2331 |
| Kahramanmaraş-Pazarcık'ta Meydana Gelen Deprem Hk. 7 | Emergency                     | 1 | 1 | 1 | 2: 2592 | 2: 2601 |
| Kahramanmaraş-Pazarcık'ta Meydana Gelen Deprem Hk. 7 | Emergency                     | 1 | 1 | 1 | 2: 2592 | 2: 2601 |

|                                                      |                                 |   |   |   |         |         |
|------------------------------------------------------|---------------------------------|---|---|---|---------|---------|
| Kahramanmaraş-Pazarcık'ta Meydana Gelen Deprem Hk. 7 | Disaster                        | 1 | 1 | 1 | 2: 2968 | 2: 2971 |
| Kahramanmaraş-Pazarcık'ta Meydana Gelen Deprem Hk. 7 | Disaster                        | 1 | 1 | 1 | 2: 2968 | 2: 2971 |
| Kahramanmaraş-Pazarcık'ta Meydana Gelen Deprem Hk. 7 | Disaster                        | 1 | 1 | 1 | 2: 2989 | 2: 2992 |
| Kahramanmaraş-Pazarcık'ta Meydana Gelen Deprem Hk. 7 | Disaster                        | 1 | 1 | 1 | 2: 2989 | 2: 2992 |
| Kahramanmaraş-Pazarcık'ta Meydana Gelen Deprem Hk. 7 | Coordination\Coordination       | 1 | 1 | 1 | 2: 3048 | 2: 3059 |
| Kahramanmaraş-Pazarcık'ta Meydana Gelen Deprem Hk. 7 | Coordination\Coordination       | 1 | 1 | 1 | 2: 3048 | 2: 3059 |
| Kahramanmaraş-Pazarcık'ta Meydana Gelen Deprem Hk. 7 | Coordination\Social media       | 1 | 0 | 0 | 2: 3190 | 2: 3201 |
| Kahramanmaraş-Pazarcık'ta Meydana Gelen Deprem Hk. 7 | Coordination\Social media usage | 0 | 1 | 0 | 2: 3190 | 2: 3201 |
| Kahramanmaraş-Pazarcık'ta Meydana Gelen Deprem Hk. 7 | Coordination\Disinformation     | 1 | 1 | 1 | 2: 3261 | 2: 3274 |
| Kahramanmaraş-Pazarcık'ta Meydana Gelen Deprem Hk. 7 | Coordination\Disinformation     | 1 | 1 | 1 | 2: 3261 | 2: 3274 |
| Kahramanmaraş-Pazarcık'ta Meydana Gelen Deprem Hk. 7 | Earthquake                      | 1 | 1 | 1 | 2: 3380 | 2: 3385 |
| Kahramanmaraş-Pazarcık'ta Meydana Gelen Deprem Hk. 7 | Earthquake                      | 1 | 1 | 1 | 2: 3380 | 2: 3385 |
| Kahramanmaraş-Pazarcık'ta Meydana Gelen Deprem Hk. 7 | AFAD                            | 1 | 1 | 1 | 2: 3500 | 2: 3503 |
| Kahramanmaraş-Pazarcık'ta Meydana Gelen Deprem Hk. 7 | AFAD                            | 1 | 1 | 1 | 2: 3500 | 2: 3503 |
| Kahramanmaraş-Pazarcık'ta Meydana Gelen Deprem Hk. 7 | Kahramanmaraş                   | 1 | 0 | 0 | 3: 17   | 3: 29   |
| Kahramanmaraş-Pazarcık'ta Meydana Gelen Deprem Hk. 7 | Pazarcık                        | 0 | 1 | 0 | 3: 17   | 3: 29   |
| Kahramanmaraş-Pazarcık'ta Meydana Gelen Deprem Hk. 7 | Earthquake                      | 1 | 1 | 1 | 3: 57   | 3: 62   |
| Kahramanmaraş-Pazarcık'ta Meydana Gelen Deprem Hk. 7 | Earthquake                      | 1 | 1 | 1 | 3: 57   | 3: 62   |
| Kahramanmaraş-Pazarcık'ta Meydana Gelen Deprem Hk. 7 | AFAD                            | 1 | 1 | 1 | 3: 97   | 3: 100  |
| Kahramanmaraş-Pazarcık'ta Meydana Gelen Deprem Hk. 7 | AFAD                            | 1 | 1 | 1 | 3: 97   | 3: 100  |

|                                                      |                               |   |   |   |        |        |
|------------------------------------------------------|-------------------------------|---|---|---|--------|--------|
| Kahramanmaraş-Pazarcık'ta Meydana Gelen Deprem Hk. 7 | Earthquake                    | 1 | 1 | 1 | 3: 148 | 3: 153 |
| Kahramanmaraş-Pazarcık'ta Meydana Gelen Deprem Hk. 7 | Earthquake                    | 1 | 1 | 1 | 3: 148 | 3: 153 |
| Kahramanmaraş-Pazarcık'ta Meydana Gelen Deprem Hk. 7 | Disaster                      | 1 | 1 | 1 | 3: 362 | 3: 365 |
| Kahramanmaraş-Pazarcık'ta Meydana Gelen Deprem Hk. 7 | Disaster                      | 1 | 1 | 1 | 3: 362 | 3: 365 |
| Kahramanmaraş-Pazarcık'ta Meydana Gelen Deprem Hk. 7 | Coordination\Public relations | 1 | 1 | 1 | 3: 521 | 3: 526 |
| Kahramanmaraş-Pazarcık'ta Meydana Gelen Deprem Hk. 7 | Coordination\Public relations | 1 | 1 | 1 | 3: 521 | 3: 526 |
| Kahramanmaraş-Pazarcık'ta Meydana Gelen Deprem Hk. 7 | AFAD                          | 1 | 1 | 1 | 3: 561 | 3: 564 |
| Kahramanmaraş-Pazarcık'ta Meydana Gelen Deprem Hk. 7 | AFAD                          | 1 | 1 | 1 | 3: 561 | 3: 564 |
| Kahramanmaraş-Pazarcık'ta Meydana Gelen Deprem Hk. 7 | AFAD                          | 1 | 1 | 1 | 3: 619 | 3: 622 |
| Kahramanmaraş-Pazarcık'ta Meydana Gelen Deprem Hk. 7 | AFAD                          | 1 | 1 | 1 | 3: 619 | 3: 622 |
| Kahramanmaraş-Pazarcık'ta Meydana Gelen Deprem Hk. 7 | AFAD                          | 1 | 1 | 1 | 3: 736 | 3: 739 |
| Kahramanmaraş-Pazarcık'ta Meydana Gelen Deprem Hk. 7 | AFAD                          | 1 | 1 | 1 | 3: 736 | 3: 739 |
| Kahramanmaraş-Pazarcık'ta Meydana Gelen Deprem Hk. 7 | Response\Search&Rescue        | 1 | 1 | 1 | 3: 830 | 3: 843 |
| Kahramanmaraş-Pazarcık'ta Meydana Gelen Deprem Hk. 7 | Response\Search&Rescue        | 1 | 1 | 1 | 3: 830 | 3: 843 |
| Kahramanmaraş-Pazarcık'ta Meydana Gelen Deprem Hk. 7 | Disaster                      | 1 | 1 | 1 | 3: 894 | 3: 897 |
| Kahramanmaraş-Pazarcık'ta Meydana Gelen Deprem Hk. 7 | Disaster                      | 1 | 1 | 1 | 3: 894 | 3: 897 |
| Kahramanmaraş-Pazarcık'ta Meydana Gelen Deprem Hk. 7 | AFAD                          | 1 | 1 | 1 | 3: 912 | 3: 915 |
| Kahramanmaraş-Pazarcık'ta Meydana Gelen Deprem Hk. 7 | AFAD                          | 1 | 1 | 1 | 3: 912 | 3: 915 |
| Kahramanmaraş-Pazarcık'ta Meydana Gelen Deprem Hk. 7 | Preparedness\Preparedness     | 1 | 1 | 1 | 3: 976 | 3: 986 |
| Kahramanmaraş-Pazarcık'ta Meydana Gelen Deprem Hk. 7 | Preparedness\Preparedness     | 1 | 1 | 1 | 3: 976 | 3: 986 |

|                                                      |                                 |   |   |   |         |         |
|------------------------------------------------------|---------------------------------|---|---|---|---------|---------|
| Kahramanmaraş-Pazarcık'ta Meydana Gelen Deprem Hk. 7 | Disaster                        | 1 | 1 | 1 | 3: 976  | 3: 979  |
| Kahramanmaraş-Pazarcık'ta Meydana Gelen Deprem Hk. 7 | Disaster                        | 1 | 1 | 1 | 3: 976  | 3: 979  |
| Kahramanmaraş-Pazarcık'ta Meydana Gelen Deprem Hk. 7 | Disaster                        | 1 | 1 | 1 | 3: 1024 | 3: 1027 |
| Kahramanmaraş-Pazarcık'ta Meydana Gelen Deprem Hk. 7 | Disaster                        | 1 | 1 | 1 | 3: 1024 | 3: 1027 |
| Kahramanmaraş-Pazarcık'ta Meydana Gelen Deprem Hk. 7 | Recovery\Fund drive             | 1 | 1 | 1 | 3: 1085 | 3: 1103 |
| Kahramanmaraş-Pazarcık'ta Meydana Gelen Deprem Hk. 7 | Recovery\Fund drive             | 1 | 1 | 1 | 3: 1085 | 3: 1103 |
| Kahramanmaraş-Pazarcık'ta Meydana Gelen Deprem Hk. 7 | Coordination\Social media       | 1 | 0 | 0 | 3: 1201 | 3: 1212 |
| Kahramanmaraş-Pazarcık'ta Meydana Gelen Deprem Hk. 7 | Coordination\Social media usage | 0 | 1 | 0 | 3: 1201 | 3: 1212 |
| Kahramanmaraş-Pazarcık'ta Meydana Gelen Deprem Hk. 7 | AFAD                            | 1 | 1 | 1 | 3: 1257 | 3: 1260 |
| Kahramanmaraş-Pazarcık'ta Meydana Gelen Deprem Hk. 7 | AFAD                            | 1 | 1 | 1 | 3: 1257 | 3: 1260 |
| Kahramanmaraş-Pazarcık'ta Meydana Gelen Deprem Hk. 7 | AFAD                            | 1 | 1 | 1 | 3: 1279 | 3: 1282 |
| Kahramanmaraş-Pazarcık'ta Meydana Gelen Deprem Hk. 7 | AFAD                            | 1 | 1 | 1 | 3: 1279 | 3: 1282 |
| Kahramanmaraş-Pazarcık'ta Meydana Gelen Deprem Hk. 7 | Coordination\Information        | 1 | 1 | 1 | 3: 1324 | 3: 1335 |
| Kahramanmaraş-Pazarcık'ta Meydana Gelen Deprem Hk. 7 | Coordination\Information        | 1 | 1 | 1 | 3: 1324 | 3: 1335 |
| Kahramanmaraş-Pazarcık'ta Meydana Gelen Deprem Hk. 7 | Recovery\Peacemaking            | 1 | 1 | 1 | 3: 1340 | 3: 1349 |
| Kahramanmaraş-Pazarcık'ta Meydana Gelen Deprem Hk. 7 | Recovery\Peacemaking            | 1 | 1 | 1 | 3: 1340 | 3: 1349 |
| Kahramanmaraş-Pazarcık'ta Meydana Gelen Deprem Hk. 7 | Coordination\Social media       | 1 | 0 | 0 | 3: 1396 | 3: 1407 |
| Kahramanmaraş-Pazarcık'ta Meydana Gelen Deprem Hk. 7 | Coordination\Social media usage | 0 | 1 | 0 | 3: 1396 | 3: 1407 |
| Kahramanmaraş-Pazarcık'ta Meydana Gelen Deprem Hk. 7 | Kahramanmaraş                   | 1 | 0 | 0 | 4: 17   | 4: 29   |
| Kahramanmaraş-Pazarcık'ta Meydana Gelen Deprem Hk. 7 | Pazarcık                        | 0 | 1 | 0 | 4: 17   | 4: 29   |

|                                                             |               |   |   |   |        |        |
|-------------------------------------------------------------|---------------|---|---|---|--------|--------|
| Kahramanmaraş-<br>Pazarcık'ta Meydana<br>Gelen Deprem Hk. 7 | Earthquake    | 1 | 1 | 1 | 4: 57  | 4: 62  |
| Kahramanmaraş-<br>Pazarcık'ta Meydana<br>Gelen Deprem Hk. 7 | Earthquake    | 1 | 1 | 1 | 4: 57  | 4: 62  |
| Kahramanmaraş-<br>Pazarcık'ta Meydana<br>Gelen Deprem Hk. 7 | AFAD          | 1 | 1 | 1 | 4: 97  | 4: 100 |
| Kahramanmaraş-<br>Pazarcık'ta Meydana<br>Gelen Deprem Hk. 7 | AFAD          | 1 | 1 | 1 | 4: 97  | 4: 100 |
| Kahramanmaraş-<br>Pazarcık'ta Meydana<br>Gelen Deprem Hk. 7 | Earthquake    | 1 | 1 | 1 | 4: 148 | 4: 153 |
| Kahramanmaraş-<br>Pazarcık'ta Meydana<br>Gelen Deprem Hk. 7 | Earthquake    | 1 | 1 | 1 | 4: 148 | 4: 153 |
| Kahramanmaraş-<br>Pazarcık'ta Meydana<br>Gelen Deprem Hk. 7 | Disaster      | 1 | 1 | 1 | 4: 209 | 4: 212 |
| Kahramanmaraş-<br>Pazarcık'ta Meydana<br>Gelen Deprem Hk. 7 | Disaster      | 1 | 1 | 1 | 4: 209 | 4: 212 |
| Kahramanmaraş-<br>Pazarcık'ta Meydana<br>Gelen Deprem Hk. 7 | Emergency     | 1 | 1 | 1 | 4: 217 | 4: 226 |
| Kahramanmaraş-<br>Pazarcık'ta Meydana<br>Gelen Deprem Hk. 7 | Emergency     | 1 | 1 | 1 | 4: 217 | 4: 226 |
| Kahramanmaraş-<br>Pazarcık'ta Meydana<br>Gelen Deprem Hk. 8 | Kahramanmaraş | 1 | 0 | 0 | 1: 17  | 1: 29  |
| Kahramanmaraş-<br>Pazarcık'ta Meydana<br>Gelen Deprem Hk. 8 | Pazarcık      | 0 | 1 | 0 | 1: 17  | 1: 29  |
| Kahramanmaraş-<br>Pazarcık'ta Meydana<br>Gelen Deprem Hk. 8 | Earthquake    | 1 | 1 | 1 | 1: 57  | 1: 62  |
| Kahramanmaraş-<br>Pazarcık'ta Meydana<br>Gelen Deprem Hk. 8 | Earthquake    | 1 | 1 | 1 | 1: 57  | 1: 62  |
| Kahramanmaraş-<br>Pazarcık'ta Meydana<br>Gelen Deprem Hk. 8 | AFAD          | 1 | 1 | 1 | 1: 97  | 1: 100 |
| Kahramanmaraş-<br>Pazarcık'ta Meydana<br>Gelen Deprem Hk. 8 | AFAD          | 1 | 1 | 1 | 1: 97  | 1: 100 |
| Kahramanmaraş-<br>Pazarcık'ta Meydana<br>Gelen Deprem Hk. 8 | Earthquake    | 1 | 1 | 1 | 1: 148 | 1: 153 |
| Kahramanmaraş-<br>Pazarcık'ta Meydana<br>Gelen Deprem Hk. 8 | Earthquake    | 1 | 1 | 1 | 1: 148 | 1: 153 |
| Kahramanmaraş-<br>Pazarcık'ta Meydana<br>Gelen Deprem Hk. 8 | Kahramanmaraş | 1 | 0 | 0 | 1: 179 | 1: 191 |
| Kahramanmaraş-<br>Pazarcık'ta Meydana<br>Gelen Deprem Hk. 8 | Pazarcık      | 0 | 1 | 0 | 1: 179 | 1: 191 |

|                                                      |                          |   |   |   |        |        |
|------------------------------------------------------|--------------------------|---|---|---|--------|--------|
| Kahramanmaraş-Pazarcık'ta Meydana Gelen Deprem Hk. 8 | Earthquake               | 1 | 1 | 1 | 1: 219 | 1: 224 |
| Kahramanmaraş-Pazarcık'ta Meydana Gelen Deprem Hk. 8 | Earthquake               | 1 | 1 | 1 | 1: 219 | 1: 224 |
| Kahramanmaraş-Pazarcık'ta Meydana Gelen Deprem Hk. 8 | Kahramanmaraş            | 1 | 0 | 0 | 1: 297 | 1: 309 |
| Kahramanmaraş-Pazarcık'ta Meydana Gelen Deprem Hk. 8 | Pazarcık                 | 0 | 1 | 0 | 1: 297 | 1: 309 |
| Kahramanmaraş-Pazarcık'ta Meydana Gelen Deprem Hk. 8 | Earthquake               | 1 | 1 | 1 | 1: 337 | 1: 342 |
| Kahramanmaraş-Pazarcık'ta Meydana Gelen Deprem Hk. 8 | Earthquake               | 1 | 1 | 1 | 1: 337 | 1: 342 |
| Kahramanmaraş-Pazarcık'ta Meydana Gelen Deprem Hk. 8 | Kahramanmaraş            | 1 | 0 | 0 | 1: 405 | 1: 417 |
| Kahramanmaraş-Pazarcık'ta Meydana Gelen Deprem Hk. 8 | Pazarcık                 | 0 | 1 | 0 | 1: 405 | 1: 417 |
| Kahramanmaraş-Pazarcık'ta Meydana Gelen Deprem Hk. 8 | Earthquake               | 1 | 1 | 1 | 1: 463 | 1: 468 |
| Kahramanmaraş-Pazarcık'ta Meydana Gelen Deprem Hk. 8 | Earthquake               | 1 | 1 | 1 | 1: 463 | 1: 468 |
| Kahramanmaraş-Pazarcık'ta Meydana Gelen Deprem Hk. 8 | Earthquake               | 1 | 1 | 1 | 1: 493 | 1: 498 |
| Kahramanmaraş-Pazarcık'ta Meydana Gelen Deprem Hk. 8 | Earthquake               | 1 | 1 | 1 | 1: 493 | 1: 498 |
| Kahramanmaraş-Pazarcık'ta Meydana Gelen Deprem Hk. 8 | Earthquake               | 1 | 1 | 1 | 1: 583 | 1: 588 |
| Kahramanmaraş-Pazarcık'ta Meydana Gelen Deprem Hk. 8 | Earthquake               | 1 | 1 | 1 | 1: 583 | 1: 588 |
| Kahramanmaraş-Pazarcık'ta Meydana Gelen Deprem Hk. 8 | Kahramanmaraş            | 1 | 0 | 0 | 1: 660 | 1: 672 |
| Kahramanmaraş-Pazarcık'ta Meydana Gelen Deprem Hk. 8 | Pazarcık                 | 0 | 1 | 0 | 1: 660 | 1: 672 |
| Kahramanmaraş-Pazarcık'ta Meydana Gelen Deprem Hk. 8 | Response\Number of staff | 1 | 0 | 0 | 1: 903 | 1: 917 |
| Kahramanmaraş-Pazarcık'ta Meydana Gelen Deprem Hk. 8 | Response\Number          | 0 | 1 | 0 | 1: 903 | 1: 917 |
| Kahramanmaraş-Pazarcık'ta Meydana Gelen Deprem Hk. 8 | AFAD                     | 1 | 1 | 1 | 1: 925 | 1: 928 |
| Kahramanmaraş-Pazarcık'ta Meydana Gelen Deprem Hk. 8 | AFAD                     | 1 | 1 | 1 | 1: 925 | 1: 928 |

|                                                      |                           |   |   |   |         |         |
|------------------------------------------------------|---------------------------|---|---|---|---------|---------|
| Kahramanmaraş-Pazarcık'ta Meydana Gelen Deprem Hk. 8 | Response\Number of staff  | 1 | 0 | 0 | 1: 963  | 1: 977  |
| Kahramanmaraş-Pazarcık'ta Meydana Gelen Deprem Hk. 8 | Response\Number           | 0 | 1 | 0 | 1: 963  | 1: 977  |
| Kahramanmaraş-Pazarcık'ta Meydana Gelen Deprem Hk. 8 | Disaster                  | 1 | 1 | 1 | 1: 1099 | 1: 1102 |
| Kahramanmaraş-Pazarcık'ta Meydana Gelen Deprem Hk. 8 | Disaster                  | 1 | 1 | 1 | 1: 1099 | 1: 1102 |
| Kahramanmaraş-Pazarcık'ta Meydana Gelen Deprem Hk. 8 | Earthquake                | 1 | 1 | 1 | 1: 1360 | 1: 1365 |
| Kahramanmaraş-Pazarcık'ta Meydana Gelen Deprem Hk. 8 | Earthquake                | 1 | 1 | 1 | 1: 1360 | 1: 1365 |
| Kahramanmaraş-Pazarcık'ta Meydana Gelen Deprem Hk. 8 | Response\Military         | 1 | 1 | 1 | 1: 1409 | 1: 1416 |
| Kahramanmaraş-Pazarcık'ta Meydana Gelen Deprem Hk. 8 | Response\Military         | 1 | 1 | 1 | 1: 1409 | 1: 1416 |
| Kahramanmaraş-Pazarcık'ta Meydana Gelen Deprem Hk. 8 | Response\Coast guard&Navy | 1 | 1 | 1 | 1: 1504 | 1: 1517 |
| Kahramanmaraş-Pazarcık'ta Meydana Gelen Deprem Hk. 8 | Response\Coast guard&Navy | 1 | 1 | 1 | 1: 1504 | 1: 1517 |
| Kahramanmaraş-Pazarcık'ta Meydana Gelen Deprem Hk. 8 | Disaster                  | 1 | 1 | 1 | 1: 1576 | 1: 1579 |
| Kahramanmaraş-Pazarcık'ta Meydana Gelen Deprem Hk. 8 | Disaster                  | 1 | 1 | 1 | 1: 1576 | 1: 1579 |
| Kahramanmaraş-Pazarcık'ta Meydana Gelen Deprem Hk. 8 | Response\Welfare service  | 1 | 1 | 1 | 1: 1613 | 1: 1625 |
| Kahramanmaraş-Pazarcık'ta Meydana Gelen Deprem Hk. 8 | Response\Welfare service  | 1 | 1 | 1 | 1: 1613 | 1: 1625 |
| Kahramanmaraş-Pazarcık'ta Meydana Gelen Deprem Hk. 8 | AFAD                      | 1 | 1 | 1 | 1: 1661 | 1: 1664 |
| Kahramanmaraş-Pazarcık'ta Meydana Gelen Deprem Hk. 8 | AFAD                      | 1 | 1 | 1 | 1: 1661 | 1: 1664 |
| Kahramanmaraş-Pazarcık'ta Meydana Gelen Deprem Hk. 8 | Emergency                 | 1 | 1 | 1 | 1: 1670 | 1: 1679 |
| Kahramanmaraş-Pazarcık'ta Meydana Gelen Deprem Hk. 8 | Emergency                 | 1 | 1 | 1 | 1: 1670 | 1: 1679 |
| Kahramanmaraş-Pazarcık'ta Meydana Gelen Deprem Hk. 8 | Disaster                  | 1 | 1 | 1 | 1: 1863 | 1: 1866 |
| Kahramanmaraş-Pazarcık'ta Meydana Gelen Deprem Hk. 8 | Disaster                  | 1 | 1 | 1 | 1: 1863 | 1: 1866 |

|                                                      |                            |   |   |   |         |         |
|------------------------------------------------------|----------------------------|---|---|---|---------|---------|
| Kahramanmaraş-Pazarcık'ta Meydana Gelen Deprem Hk. 8 | Disaster                   | 1 | 1 | 1 | 1: 1882 | 1: 1885 |
| Kahramanmaraş-Pazarcık'ta Meydana Gelen Deprem Hk. 8 | Disaster                   | 1 | 1 | 1 | 1: 1882 | 1: 1885 |
| Kahramanmaraş-Pazarcık'ta Meydana Gelen Deprem Hk. 8 | Kahramanmaraş              | 1 | 0 | 0 | 1: 2218 | 1: 2230 |
| Kahramanmaraş-Pazarcık'ta Meydana Gelen Deprem Hk. 8 | Pazarcık                   | 0 | 1 | 0 | 1: 2218 | 1: 2230 |
| Kahramanmaraş-Pazarcık'ta Meydana Gelen Deprem Hk. 8 | Disaster                   | 1 | 1 | 1 | 1: 2326 | 1: 2329 |
| Kahramanmaraş-Pazarcık'ta Meydana Gelen Deprem Hk. 8 | Disaster                   | 1 | 1 | 1 | 1: 2326 | 1: 2329 |
| Kahramanmaraş-Pazarcık'ta Meydana Gelen Deprem Hk. 8 | Kahramanmaraş              | 1 | 0 | 0 | 1: 2349 | 1: 2361 |
| Kahramanmaraş-Pazarcık'ta Meydana Gelen Deprem Hk. 8 | Pazarcık                   | 0 | 1 | 0 | 1: 2349 | 1: 2361 |
| Kahramanmaraş-Pazarcık'ta Meydana Gelen Deprem Hk. 8 | Earthquake                 | 1 | 1 | 1 | 1: 2487 | 1: 2492 |
| Kahramanmaraş-Pazarcık'ta Meydana Gelen Deprem Hk. 8 | Earthquake                 | 1 | 1 | 1 | 1: 2487 | 1: 2492 |
| Kahramanmaraş-Pazarcık'ta Meydana Gelen Deprem Hk. 8 | Coordination\Communication | 1 | 1 | 1 | 1: 2786 | 1: 2793 |
| Kahramanmaraş-Pazarcık'ta Meydana Gelen Deprem Hk. 8 | Coordination\Communication | 1 | 1 | 1 | 1: 2786 | 1: 2793 |
| Kahramanmaraş-Pazarcık'ta Meydana Gelen Deprem Hk. 8 | Disaster                   | 1 | 1 | 1 | 1: 2827 | 1: 2830 |
| Kahramanmaraş-Pazarcık'ta Meydana Gelen Deprem Hk. 8 | Disaster                   | 1 | 1 | 1 | 1: 2827 | 1: 2830 |
| Kahramanmaraş-Pazarcık'ta Meydana Gelen Deprem Hk. 8 | Kahramanmaraş              | 1 | 0 | 0 | 2: 17   | 2: 29   |
| Kahramanmaraş-Pazarcık'ta Meydana Gelen Deprem Hk. 8 | Pazarcık                   | 0 | 1 | 0 | 2: 17   | 2: 29   |
| Kahramanmaraş-Pazarcık'ta Meydana Gelen Deprem Hk. 8 | Earthquake                 | 1 | 1 | 1 | 2: 57   | 2: 62   |
| Kahramanmaraş-Pazarcık'ta Meydana Gelen Deprem Hk. 8 | Earthquake                 | 1 | 1 | 1 | 2: 57   | 2: 62   |
| Kahramanmaraş-Pazarcık'ta Meydana Gelen Deprem Hk. 8 | AFAD                       | 1 | 1 | 1 | 2: 97   | 2: 100  |
| Kahramanmaraş-Pazarcık'ta Meydana Gelen Deprem Hk. 8 | AFAD                       | 1 | 1 | 1 | 2: 97   | 2: 100  |



|                                                      |                             |   |   |   |        |        |
|------------------------------------------------------|-----------------------------|---|---|---|--------|--------|
| Kahramanmaraş-Pazarcık'ta Meydana Gelen Deprem Hk. 8 | Earthquake                  | 1 | 1 | 1 | 2: 148 | 2: 153 |
| Kahramanmaraş-Pazarcık'ta Meydana Gelen Deprem Hk. 8 | Earthquake                  | 1 | 1 | 1 | 2: 148 | 2: 153 |
| Kahramanmaraş-Pazarcık'ta Meydana Gelen Deprem Hk. 8 | Disaster                    | 1 | 1 | 1 | 2: 179 | 2: 182 |
| Kahramanmaraş-Pazarcık'ta Meydana Gelen Deprem Hk. 8 | Disaster                    | 1 | 1 | 1 | 2: 179 | 2: 182 |
| Kahramanmaraş-Pazarcık'ta Meydana Gelen Deprem Hk. 8 | Response\Number of staff    | 1 | 0 | 0 | 2: 229 | 2: 251 |
| Kahramanmaraş-Pazarcık'ta Meydana Gelen Deprem Hk. 8 | Response\Search&Rescue      | 1 | 1 | 1 | 2: 229 | 2: 242 |
| Kahramanmaraş-Pazarcık'ta Meydana Gelen Deprem Hk. 8 | Response\Search&Rescue      | 1 | 1 | 1 | 2: 229 | 2: 242 |
| Kahramanmaraş-Pazarcık'ta Meydana Gelen Deprem Hk. 8 | Response\Number             | 0 | 1 | 0 | 2: 229 | 2: 251 |
| Kahramanmaraş-Pazarcık'ta Meydana Gelen Deprem Hk. 8 | Disaster                    | 1 | 1 | 1 | 2: 281 | 2: 284 |
| Kahramanmaraş-Pazarcık'ta Meydana Gelen Deprem Hk. 8 | Disaster                    | 1 | 1 | 1 | 2: 281 | 2: 284 |
| Kahramanmaraş-Pazarcık'ta Meydana Gelen Deprem Hk. 8 | Earthquake                  | 1 | 1 | 1 | 2: 395 | 2: 400 |
| Kahramanmaraş-Pazarcık'ta Meydana Gelen Deprem Hk. 8 | Earthquake                  | 1 | 1 | 1 | 2: 395 | 2: 400 |
| Kahramanmaraş-Pazarcık'ta Meydana Gelen Deprem Hk. 8 | Response\Coast guard&Navy   | 1 | 1 | 1 | 2: 468 | 2: 481 |
| Kahramanmaraş-Pazarcık'ta Meydana Gelen Deprem Hk. 8 | Response\Coast guard&Navy   | 1 | 1 | 1 | 2: 468 | 2: 481 |
| Kahramanmaraş-Pazarcık'ta Meydana Gelen Deprem Hk. 8 | Response\Number of staff    | 1 | 0 | 0 | 2: 734 | 2: 756 |
| Kahramanmaraş-Pazarcık'ta Meydana Gelen Deprem Hk. 8 | Response\Search&Rescue      | 1 | 1 | 1 | 2: 734 | 2: 747 |
| Kahramanmaraş-Pazarcık'ta Meydana Gelen Deprem Hk. 8 | Response\Search&Rescue      | 1 | 1 | 1 | 2: 734 | 2: 747 |
| Kahramanmaraş-Pazarcık'ta Meydana Gelen Deprem Hk. 8 | Response\Number             | 0 | 1 | 0 | 2: 734 | 2: 756 |
| Kahramanmaraş-Pazarcık'ta Meydana Gelen Deprem Hk. 8 | Shelter&meal\Mobile kitchen | 1 | 1 | 1 | 2: 855 | 2: 866 |
| Kahramanmaraş-Pazarcık'ta Meydana Gelen Deprem Hk. 8 | Shelter&meal\Mobile kitchen | 1 | 1 | 1 | 2: 855 | 2: 866 |

|                                                      |                            |   |   |   |         |         |
|------------------------------------------------------|----------------------------|---|---|---|---------|---------|
| Kahramanmaraş-Pazarcık'ta Meydana Gelen Deprem Hk. 8 | Shelter&meal\Mobile bakery | 1 | 1 | 1 | 2: 872  | 2: 882  |
| Kahramanmaraş-Pazarcık'ta Meydana Gelen Deprem Hk. 8 | Shelter&meal\Mobile bakery | 1 | 1 | 1 | 2: 872  | 2: 882  |
| Kahramanmaraş-Pazarcık'ta Meydana Gelen Deprem Hk. 8 | Kahramanmaraş              | 1 | 0 | 0 | 2: 884  | 2: 896  |
| Kahramanmaraş-Pazarcık'ta Meydana Gelen Deprem Hk. 8 | Pazarcık                   | 0 | 1 | 0 | 2: 884  | 2: 896  |
| Kahramanmaraş-Pazarcık'ta Meydana Gelen Deprem Hk. 8 | Response\Military          | 1 | 1 | 1 | 2: 923  | 2: 930  |
| Kahramanmaraş-Pazarcık'ta Meydana Gelen Deprem Hk. 8 | Response\Military          | 1 | 1 | 1 | 2: 923  | 2: 930  |
| Kahramanmaraş-Pazarcık'ta Meydana Gelen Deprem Hk. 8 | Kahramanmaraş              | 1 | 0 | 0 | 2: 1029 | 2: 1041 |
| Kahramanmaraş-Pazarcık'ta Meydana Gelen Deprem Hk. 8 | Pazarcık                   | 0 | 1 | 0 | 2: 1029 | 2: 1041 |
| Kahramanmaraş-Pazarcık'ta Meydana Gelen Deprem Hk. 8 | Kahramanmaraş              | 1 | 0 | 0 | 2: 1130 | 2: 1142 |
| Kahramanmaraş-Pazarcık'ta Meydana Gelen Deprem Hk. 8 | Pazarcık                   | 0 | 1 | 0 | 2: 1130 | 2: 1142 |
| Kahramanmaraş-Pazarcık'ta Meydana Gelen Deprem Hk. 8 | Kahramanmaraş              | 1 | 0 | 0 | 2: 1232 | 2: 1244 |
| Kahramanmaraş-Pazarcık'ta Meydana Gelen Deprem Hk. 8 | Pazarcık                   | 0 | 1 | 0 | 2: 1232 | 2: 1244 |
| Kahramanmaraş-Pazarcık'ta Meydana Gelen Deprem Hk. 8 | Response\Military          | 1 | 1 | 1 | 2: 1310 | 2: 1317 |
| Kahramanmaraş-Pazarcık'ta Meydana Gelen Deprem Hk. 8 | Response\Military          | 1 | 1 | 1 | 2: 1310 | 2: 1317 |
| Kahramanmaraş-Pazarcık'ta Meydana Gelen Deprem Hk. 8 | Disaster                   | 1 | 1 | 1 | 2: 1534 | 2: 1537 |
| Kahramanmaraş-Pazarcık'ta Meydana Gelen Deprem Hk. 8 | Disaster                   | 1 | 1 | 1 | 2: 1534 | 2: 1537 |
| Kahramanmaraş-Pazarcık'ta Meydana Gelen Deprem Hk. 8 | Shelter&meal\Sheltering    | 1 | 1 | 1 | 2: 1539 | 2: 1545 |
| Kahramanmaraş-Pazarcık'ta Meydana Gelen Deprem Hk. 8 | Shelter&meal\Sheltering    | 1 | 1 | 1 | 2: 1539 | 2: 1545 |
| Kahramanmaraş-Pazarcık'ta Meydana Gelen Deprem Hk. 8 | AFAD                       | 1 | 1 | 1 | 2: 1592 | 2: 1595 |
| Kahramanmaraş-Pazarcık'ta Meydana Gelen Deprem Hk. 8 | AFAD                       | 1 | 1 | 1 | 2: 1592 | 2: 1595 |

|                                                      |                              |   |   |   |         |         |
|------------------------------------------------------|------------------------------|---|---|---|---------|---------|
| Kahramanmaraş-Pazarcık'ta Meydana Gelen Deprem Hk. 8 | Shelter&meal\\Tent           | 1 | 1 | 1 | 2: 1608 | 2: 1612 |
| Kahramanmaraş-Pazarcık'ta Meydana Gelen Deprem Hk. 8 | Shelter&meal\\Tent           | 1 | 1 | 1 | 2: 1608 | 2: 1612 |
| Kahramanmaraş-Pazarcık'ta Meydana Gelen Deprem Hk. 8 | Disaster                     | 1 | 1 | 1 | 2: 1744 | 2: 1747 |
| Kahramanmaraş-Pazarcık'ta Meydana Gelen Deprem Hk. 8 | Disaster                     | 1 | 1 | 1 | 2: 1744 | 2: 1747 |
| Kahramanmaraş-Pazarcık'ta Meydana Gelen Deprem Hk. 8 | Shelter&meal\\Mobile kitchen | 1 | 1 | 1 | 2: 1795 | 2: 1806 |
| Kahramanmaraş-Pazarcık'ta Meydana Gelen Deprem Hk. 8 | Shelter&meal\\Mobile kitchen | 1 | 1 | 1 | 2: 1795 | 2: 1806 |
| Kahramanmaraş-Pazarcık'ta Meydana Gelen Deprem Hk. 8 | Shelter&meal\\Mobile bakery  | 1 | 1 | 1 | 2: 1842 | 2: 1852 |
| Kahramanmaraş-Pazarcık'ta Meydana Gelen Deprem Hk. 8 | Shelter&meal\\Mobile bakery  | 1 | 1 | 1 | 2: 1842 | 2: 1852 |
| Kahramanmaraş-Pazarcık'ta Meydana Gelen Deprem Hk. 8 | Response\\Military           | 1 | 1 | 1 | 2: 1900 | 2: 1907 |
| Kahramanmaraş-Pazarcık'ta Meydana Gelen Deprem Hk. 8 | Response\\Military           | 1 | 1 | 1 | 2: 1900 | 2: 1907 |
| Kahramanmaraş-Pazarcık'ta Meydana Gelen Deprem Hk. 8 | Shelter&meal\\Mobile kitchen | 1 | 1 | 1 | 2: 1916 | 2: 1927 |
| Kahramanmaraş-Pazarcık'ta Meydana Gelen Deprem Hk. 8 | Shelter&meal\\Mobile kitchen | 1 | 1 | 1 | 2: 1916 | 2: 1927 |
| Kahramanmaraş-Pazarcık'ta Meydana Gelen Deprem Hk. 8 | Shelter&meal\\Mobile bakery  | 1 | 1 | 1 | 2: 1932 | 2: 1942 |
| Kahramanmaraş-Pazarcık'ta Meydana Gelen Deprem Hk. 8 | Shelter&meal\\Mobile bakery  | 1 | 1 | 1 | 2: 1932 | 2: 1942 |
| Kahramanmaraş-Pazarcık'ta Meydana Gelen Deprem Hk. 8 | Shelter&meal\\Mobile kitchen | 1 | 1 | 1 | 2: 2000 | 2: 2011 |
| Kahramanmaraş-Pazarcık'ta Meydana Gelen Deprem Hk. 8 | Shelter&meal\\Mobile kitchen | 1 | 1 | 1 | 2: 2000 | 2: 2011 |
| Kahramanmaraş-Pazarcık'ta Meydana Gelen Deprem Hk. 8 | Shelter&meal\\Hot meal       | 1 | 1 | 1 | 2: 2266 | 2: 2276 |
| Kahramanmaraş-Pazarcık'ta Meydana Gelen Deprem Hk. 8 | Shelter&meal\\Hot meal       | 1 | 1 | 1 | 2: 2266 | 2: 2276 |
| Kahramanmaraş-Pazarcık'ta Meydana Gelen Deprem Hk. 8 | Disaster                     | 1 | 1 | 1 | 2: 2483 | 2: 2486 |
| Kahramanmaraş-Pazarcık'ta Meydana Gelen Deprem Hk. 8 | Disaster                     | 1 | 1 | 1 | 2: 2483 | 2: 2486 |

|                                                      |                               |   |   |   |         |         |
|------------------------------------------------------|-------------------------------|---|---|---|---------|---------|
| Kahramanmaraş-Pazarcık'ta Meydana Gelen Deprem Hk. 8 | Response\Psychosocial support | 1 | 1 | 1 | 2: 2488 | 2: 2497 |
| Kahramanmaraş-Pazarcık'ta Meydana Gelen Deprem Hk. 8 | Response\Psychosocial support | 1 | 1 | 1 | 2: 2488 | 2: 2497 |
| Kahramanmaraş-Pazarcık'ta Meydana Gelen Deprem Hk. 8 | Response\Welfare service      | 1 | 1 | 1 | 2: 2521 | 2: 2533 |
| Kahramanmaraş-Pazarcık'ta Meydana Gelen Deprem Hk. 8 | Response\Welfare service      | 1 | 1 | 1 | 2: 2521 | 2: 2533 |
| Kahramanmaraş-Pazarcık'ta Meydana Gelen Deprem Hk. 8 | Kahramanmaraş                 | 1 | 0 | 0 | 2: 2544 | 2: 2556 |
| Kahramanmaraş-Pazarcık'ta Meydana Gelen Deprem Hk. 8 | Pazarcık                      | 0 | 1 | 0 | 2: 2544 | 2: 2556 |
| Kahramanmaraş-Pazarcık'ta Meydana Gelen Deprem Hk. 8 | Disaster                      | 1 | 1 | 1 | 2: 2667 | 2: 2670 |
| Kahramanmaraş-Pazarcık'ta Meydana Gelen Deprem Hk. 8 | Disaster                      | 1 | 1 | 1 | 2: 2667 | 2: 2670 |
| Kahramanmaraş-Pazarcık'ta Meydana Gelen Deprem Hk. 8 | Kahramanmaraş                 | 1 | 0 | 0 | 2: 2850 | 2: 2862 |
| Kahramanmaraş-Pazarcık'ta Meydana Gelen Deprem Hk. 8 | Pazarcık                      | 0 | 1 | 0 | 2: 2850 | 2: 2862 |
| Kahramanmaraş-Pazarcık'ta Meydana Gelen Deprem Hk. 8 | Emergency                     | 1 | 1 | 1 | 2: 3123 | 2: 3132 |
| Kahramanmaraş-Pazarcık'ta Meydana Gelen Deprem Hk. 8 | Emergency                     | 1 | 1 | 1 | 2: 3123 | 2: 3132 |
| Kahramanmaraş-Pazarcık'ta Meydana Gelen Deprem Hk. 8 | Disaster                      | 1 | 1 | 1 | 2: 3679 | 2: 3682 |
| Kahramanmaraş-Pazarcık'ta Meydana Gelen Deprem Hk. 8 | Disaster                      | 1 | 1 | 1 | 2: 3679 | 2: 3682 |
| Kahramanmaraş-Pazarcık'ta Meydana Gelen Deprem Hk. 8 | Kahramanmaraş                 | 1 | 0 | 0 | 3: 17   | 3: 29   |
| Kahramanmaraş-Pazarcık'ta Meydana Gelen Deprem Hk. 8 | Pazarcık                      | 0 | 1 | 0 | 3: 17   | 3: 29   |
| Kahramanmaraş-Pazarcık'ta Meydana Gelen Deprem Hk. 8 | Earthquake                    | 1 | 1 | 1 | 3: 57   | 3: 62   |
| Kahramanmaraş-Pazarcık'ta Meydana Gelen Deprem Hk. 8 | Earthquake                    | 1 | 1 | 1 | 3: 57   | 3: 62   |
| Kahramanmaraş-Pazarcık'ta Meydana Gelen Deprem Hk. 8 | AFAD                          | 1 | 1 | 1 | 3: 97   | 3: 100  |
| Kahramanmaraş-Pazarcık'ta Meydana Gelen Deprem Hk. 8 | AFAD                          | 1 | 1 | 1 | 3: 97   | 3: 100  |

|                                                      |                                 |   |   |   |         |         |
|------------------------------------------------------|---------------------------------|---|---|---|---------|---------|
| Kahramanmaraş-Pazarcık'ta Meydana Gelen Deprem Hk. 8 | Earthquake                      | 1 | 1 | 1 | 3: 148  | 3: 153  |
| Kahramanmaraş-Pazarcık'ta Meydana Gelen Deprem Hk. 8 | Earthquake                      | 1 | 1 | 1 | 3: 148  | 3: 153  |
| Kahramanmaraş-Pazarcık'ta Meydana Gelen Deprem Hk. 8 | Disaster                        | 1 | 1 | 1 | 3: 179  | 3: 182  |
| Kahramanmaraş-Pazarcık'ta Meydana Gelen Deprem Hk. 8 | Disaster                        | 1 | 1 | 1 | 3: 179  | 3: 182  |
| Kahramanmaraş-Pazarcık'ta Meydana Gelen Deprem Hk. 8 | Coordination\Coordination       | 1 | 1 | 1 | 3: 238  | 3: 249  |
| Kahramanmaraş-Pazarcık'ta Meydana Gelen Deprem Hk. 8 | Coordination\Coordination       | 1 | 1 | 1 | 3: 238  | 3: 249  |
| Kahramanmaraş-Pazarcık'ta Meydana Gelen Deprem Hk. 8 | Coordination\Social media       | 1 | 0 | 0 | 3: 380  | 3: 391  |
| Kahramanmaraş-Pazarcık'ta Meydana Gelen Deprem Hk. 8 | Coordination\Social media usage | 0 | 1 | 0 | 3: 380  | 3: 391  |
| Kahramanmaraş-Pazarcık'ta Meydana Gelen Deprem Hk. 8 | Coordination\Disinformation     | 1 | 1 | 1 | 3: 451  | 3: 464  |
| Kahramanmaraş-Pazarcık'ta Meydana Gelen Deprem Hk. 8 | Coordination\Disinformation     | 1 | 1 | 1 | 3: 451  | 3: 464  |
| Kahramanmaraş-Pazarcık'ta Meydana Gelen Deprem Hk. 8 | Earthquake                      | 1 | 1 | 1 | 3: 570  | 3: 575  |
| Kahramanmaraş-Pazarcık'ta Meydana Gelen Deprem Hk. 8 | Earthquake                      | 1 | 1 | 1 | 3: 570  | 3: 575  |
| Kahramanmaraş-Pazarcık'ta Meydana Gelen Deprem Hk. 8 | AFAD                            | 1 | 1 | 1 | 3: 690  | 3: 693  |
| Kahramanmaraş-Pazarcık'ta Meydana Gelen Deprem Hk. 8 | AFAD                            | 1 | 1 | 1 | 3: 690  | 3: 693  |
| Kahramanmaraş-Pazarcık'ta Meydana Gelen Deprem Hk. 8 | Disaster                        | 1 | 1 | 1 | 3: 986  | 3: 989  |
| Kahramanmaraş-Pazarcık'ta Meydana Gelen Deprem Hk. 8 | Disaster                        | 1 | 1 | 1 | 3: 986  | 3: 989  |
| Kahramanmaraş-Pazarcık'ta Meydana Gelen Deprem Hk. 8 | Coordination\Public relations   | 1 | 1 | 1 | 3: 1145 | 3: 1150 |
| Kahramanmaraş-Pazarcık'ta Meydana Gelen Deprem Hk. 8 | Coordination\Public relations   | 1 | 1 | 1 | 3: 1145 | 3: 1150 |
| Kahramanmaraş-Pazarcık'ta Meydana Gelen Deprem Hk. 8 | AFAD                            | 1 | 1 | 1 | 3: 1185 | 3: 1188 |
| Kahramanmaraş-Pazarcık'ta Meydana Gelen Deprem Hk. 8 | AFAD                            | 1 | 1 | 1 | 3: 1185 | 3: 1188 |

|                                                             |                                 |   |   |   |         |         |
|-------------------------------------------------------------|---------------------------------|---|---|---|---------|---------|
| Kahramanmaraş-<br>Pazarcık'ta Meydana<br>Gelen Deprem Hk. 8 | AFAD                            | 1 | 1 | 1 | 3: 1243 | 3: 1246 |
| Kahramanmaraş-<br>Pazarcık'ta Meydana<br>Gelen Deprem Hk. 8 | AFAD                            | 1 | 1 | 1 | 3: 1243 | 3: 1246 |
| Kahramanmaraş-<br>Pazarcık'ta Meydana<br>Gelen Deprem Hk. 8 | AFAD                            | 1 | 1 | 1 | 3: 1360 | 3: 1363 |
| Kahramanmaraş-<br>Pazarcık'ta Meydana<br>Gelen Deprem Hk. 8 | AFAD                            | 1 | 1 | 1 | 3: 1360 | 3: 1363 |
| Kahramanmaraş-<br>Pazarcık'ta Meydana<br>Gelen Deprem Hk. 8 | Response\Search&Rescue          | 1 | 1 | 1 | 3: 1454 | 3: 1467 |
| Kahramanmaraş-<br>Pazarcık'ta Meydana<br>Gelen Deprem Hk. 8 | Response\Search&Rescue          | 1 | 1 | 1 | 3: 1454 | 3: 1467 |
| Kahramanmaraş-<br>Pazarcık'ta Meydana<br>Gelen Deprem Hk. 8 | Disaster                        | 1 | 1 | 1 | 3: 1518 | 3: 1521 |
| Kahramanmaraş-<br>Pazarcık'ta Meydana<br>Gelen Deprem Hk. 8 | Disaster                        | 1 | 1 | 1 | 3: 1518 | 3: 1521 |
| Kahramanmaraş-<br>Pazarcık'ta Meydana<br>Gelen Deprem Hk. 8 | AFAD                            | 1 | 1 | 1 | 3: 1536 | 3: 1539 |
| Kahramanmaraş-<br>Pazarcık'ta Meydana<br>Gelen Deprem Hk. 8 | AFAD                            | 1 | 1 | 1 | 3: 1536 | 3: 1539 |
| Kahramanmaraş-<br>Pazarcık'ta Meydana<br>Gelen Deprem Hk. 8 | Preparedness\Preparedness       | 1 | 1 | 1 | 3: 1600 | 3: 1610 |
| Kahramanmaraş-<br>Pazarcık'ta Meydana<br>Gelen Deprem Hk. 8 | Preparedness\Preparedness       | 1 | 1 | 1 | 3: 1600 | 3: 1610 |
| Kahramanmaraş-<br>Pazarcık'ta Meydana<br>Gelen Deprem Hk. 8 | Disaster                        | 1 | 1 | 1 | 3: 1600 | 3: 1603 |
| Kahramanmaraş-<br>Pazarcık'ta Meydana<br>Gelen Deprem Hk. 8 | Disaster                        | 1 | 1 | 1 | 3: 1600 | 3: 1603 |
| Kahramanmaraş-<br>Pazarcık'ta Meydana<br>Gelen Deprem Hk. 8 | Disaster                        | 1 | 1 | 1 | 3: 1648 | 3: 1651 |
| Kahramanmaraş-<br>Pazarcık'ta Meydana<br>Gelen Deprem Hk. 8 | Disaster                        | 1 | 1 | 1 | 3: 1648 | 3: 1651 |
| Kahramanmaraş-<br>Pazarcık'ta Meydana<br>Gelen Deprem Hk. 8 | Recovery\Fund drive             | 1 | 1 | 1 | 3: 1709 | 3: 1727 |
| Kahramanmaraş-<br>Pazarcık'ta Meydana<br>Gelen Deprem Hk. 8 | Recovery\Fund drive             | 1 | 1 | 1 | 3: 1709 | 3: 1727 |
| Kahramanmaraş-<br>Pazarcık'ta Meydana<br>Gelen Deprem Hk. 8 | Coordination\Social media       | 1 | 0 | 0 | 3: 1825 | 3: 1836 |
| Kahramanmaraş-<br>Pazarcık'ta Meydana<br>Gelen Deprem Hk. 8 | Coordination\Social media usage | 0 | 1 | 0 | 3: 1825 | 3: 1836 |

|                                                      |                                 |   |   |   |         |         |
|------------------------------------------------------|---------------------------------|---|---|---|---------|---------|
| Kahramanmaraş-Pazarcık'ta Meydana Gelen Deprem Hk. 8 | AFAD                            | 1 | 1 | 1 | 3: 1881 | 3: 1884 |
| Kahramanmaraş-Pazarcık'ta Meydana Gelen Deprem Hk. 8 | AFAD                            | 1 | 1 | 1 | 3: 1881 | 3: 1884 |
| Kahramanmaraş-Pazarcık'ta Meydana Gelen Deprem Hk. 8 | AFAD                            | 1 | 1 | 1 | 3: 1903 | 3: 1906 |
| Kahramanmaraş-Pazarcık'ta Meydana Gelen Deprem Hk. 8 | AFAD                            | 1 | 1 | 1 | 3: 1903 | 3: 1906 |
| Kahramanmaraş-Pazarcık'ta Meydana Gelen Deprem Hk. 8 | Coordination\Information        | 1 | 1 | 1 | 3: 1948 | 3: 1959 |
| Kahramanmaraş-Pazarcık'ta Meydana Gelen Deprem Hk. 8 | Coordination\Information        | 1 | 1 | 1 | 3: 1948 | 3: 1959 |
| Kahramanmaraş-Pazarcık'ta Meydana Gelen Deprem Hk. 8 | Recovery\Peacemaking            | 1 | 1 | 1 | 3: 1964 | 3: 1973 |
| Kahramanmaraş-Pazarcık'ta Meydana Gelen Deprem Hk. 8 | Recovery\Peacemaking            | 1 | 1 | 1 | 3: 1964 | 3: 1973 |
| Kahramanmaraş-Pazarcık'ta Meydana Gelen Deprem Hk. 8 | Kahramanmaraş                   | 1 | 0 | 0 | 4: 17   | 4: 29   |
| Kahramanmaraş-Pazarcık'ta Meydana Gelen Deprem Hk. 8 | Pazarcık                        | 0 | 1 | 0 | 4: 17   | 4: 29   |
| Kahramanmaraş-Pazarcık'ta Meydana Gelen Deprem Hk. 8 | Earthquake                      | 1 | 1 | 1 | 4: 57   | 4: 62   |
| Kahramanmaraş-Pazarcık'ta Meydana Gelen Deprem Hk. 8 | Earthquake                      | 1 | 1 | 1 | 4: 57   | 4: 62   |
| Kahramanmaraş-Pazarcık'ta Meydana Gelen Deprem Hk. 8 | AFAD                            | 1 | 1 | 1 | 4: 97   | 4: 100  |
| Kahramanmaraş-Pazarcık'ta Meydana Gelen Deprem Hk. 8 | AFAD                            | 1 | 1 | 1 | 4: 97   | 4: 100  |
| Kahramanmaraş-Pazarcık'ta Meydana Gelen Deprem Hk. 8 | Earthquake                      | 1 | 1 | 1 | 4: 148  | 4: 153  |
| Kahramanmaraş-Pazarcık'ta Meydana Gelen Deprem Hk. 8 | Earthquake                      | 1 | 1 | 1 | 4: 148  | 4: 153  |
| Kahramanmaraş-Pazarcık'ta Meydana Gelen Deprem Hk. 8 | Coordination\Social media       | 1 | 0 | 0 | 4: 179  | 4: 190  |
| Kahramanmaraş-Pazarcık'ta Meydana Gelen Deprem Hk. 8 | Coordination\Social media usage | 0 | 1 | 0 | 4: 179  | 4: 190  |
| Kahramanmaraş-Pazarcık'ta Meydana Gelen Deprem Hk. 8 | Disaster                        | 1 | 1 | 1 | 4: 281  | 4: 284  |
| Kahramanmaraş-Pazarcık'ta Meydana Gelen Deprem Hk. 8 | Disaster                        | 1 | 1 | 1 | 4: 281  | 4: 284  |

|                                                       |               |   |   |   |        |        |
|-------------------------------------------------------|---------------|---|---|---|--------|--------|
| Kahramanmaraş-Pazarcık'ta Meydana Gelen Deprem Hk. 8  | Emergency     | 1 | 1 | 1 | 4: 289 | 4: 298 |
| Kahramanmaraş-Pazarcık'ta Meydana Gelen Deprem Hk. 8  | Emergency     | 1 | 1 | 1 | 4: 289 | 4: 298 |
| Kahramanmaraş-Pazarcık'ta Meydana Gelen Deprem Hk. 10 | Kahramanmaraş | 1 | 0 | 0 | 1: 17  | 1: 29  |
| Kahramanmaraş-Pazarcık'ta Meydana Gelen Deprem Hk. 10 | Pazarcık      | 0 | 1 | 0 | 1: 17  | 1: 29  |
| Kahramanmaraş-Pazarcık'ta Meydana Gelen Deprem Hk. 10 | Earthquake    | 1 | 1 | 1 | 1: 57  | 1: 62  |
| Kahramanmaraş-Pazarcık'ta Meydana Gelen Deprem Hk. 10 | Earthquake    | 1 | 1 | 1 | 1: 57  | 1: 62  |
| Kahramanmaraş-Pazarcık'ta Meydana Gelen Deprem Hk. 10 | AFAD          | 1 | 1 | 1 | 1: 98  | 1: 101 |
| Kahramanmaraş-Pazarcık'ta Meydana Gelen Deprem Hk. 10 | AFAD          | 1 | 1 | 1 | 1: 98  | 1: 101 |
| Kahramanmaraş-Pazarcık'ta Meydana Gelen Deprem Hk. 10 | Earthquake    | 1 | 1 | 1 | 1: 149 | 1: 154 |
| Kahramanmaraş-Pazarcık'ta Meydana Gelen Deprem Hk. 10 | Earthquake    | 1 | 1 | 1 | 1: 149 | 1: 154 |
| Kahramanmaraş-Pazarcık'ta Meydana Gelen Deprem Hk. 10 | Kahramanmaraş | 1 | 0 | 0 | 1: 180 | 1: 192 |
| Kahramanmaraş-Pazarcık'ta Meydana Gelen Deprem Hk. 10 | Pazarcık      | 0 | 1 | 0 | 1: 180 | 1: 192 |
| Kahramanmaraş-Pazarcık'ta Meydana Gelen Deprem Hk. 10 | Earthquake    | 1 | 1 | 1 | 1: 220 | 1: 225 |
| Kahramanmaraş-Pazarcık'ta Meydana Gelen Deprem Hk. 10 | Earthquake    | 1 | 1 | 1 | 1: 220 | 1: 225 |
| Kahramanmaraş-Pazarcık'ta Meydana Gelen Deprem Hk. 10 | Kahramanmaraş | 1 | 0 | 0 | 1: 299 | 1: 311 |
| Kahramanmaraş-Pazarcık'ta Meydana Gelen Deprem Hk. 10 | Pazarcık      | 0 | 1 | 0 | 1: 299 | 1: 311 |
| Kahramanmaraş-Pazarcık'ta Meydana Gelen Deprem Hk. 10 | Earthquake    | 1 | 1 | 1 | 1: 339 | 1: 344 |
| Kahramanmaraş-Pazarcık'ta Meydana Gelen Deprem Hk. 10 | Earthquake    | 1 | 1 | 1 | 1: 339 | 1: 344 |
| Kahramanmaraş-Pazarcık'ta Meydana Gelen Deprem Hk. 10 | Kahramanmaraş | 1 | 0 | 0 | 1: 408 | 1: 420 |
| Kahramanmaraş-Pazarcık'ta Meydana Gelen Deprem Hk. 10 | Pazarcık      | 0 | 1 | 0 | 1: 408 | 1: 420 |



|                                                       |                           |   |   |   |         |         |
|-------------------------------------------------------|---------------------------|---|---|---|---------|---------|
| Kahramanmaraş-Pazarcık'ta Meydana Gelen Deprem Hk. 10 | Earthquake                | 1 | 1 | 1 | 1: 466  | 1: 471  |
| Kahramanmaraş-Pazarcık'ta Meydana Gelen Deprem Hk. 10 | Earthquake                | 1 | 1 | 1 | 1: 466  | 1: 471  |
| Kahramanmaraş-Pazarcık'ta Meydana Gelen Deprem Hk. 10 | Earthquake                | 1 | 1 | 1 | 1: 496  | 1: 501  |
| Kahramanmaraş-Pazarcık'ta Meydana Gelen Deprem Hk. 10 | Earthquake                | 1 | 1 | 1 | 1: 496  | 1: 501  |
| Kahramanmaraş-Pazarcık'ta Meydana Gelen Deprem Hk. 10 | Earthquake                | 1 | 1 | 1 | 1: 586  | 1: 591  |
| Kahramanmaraş-Pazarcık'ta Meydana Gelen Deprem Hk. 10 | Earthquake                | 1 | 1 | 1 | 1: 586  | 1: 591  |
| Kahramanmaraş-Pazarcık'ta Meydana Gelen Deprem Hk. 10 | Kahramanmaraş             | 1 | 0 | 0 | 1: 659  | 1: 671  |
| Kahramanmaraş-Pazarcık'ta Meydana Gelen Deprem Hk. 10 | Pazarcık                  | 0 | 1 | 0 | 1: 659  | 1: 671  |
| Kahramanmaraş-Pazarcık'ta Meydana Gelen Deprem Hk. 10 | Response\Number of staff  | 1 | 0 | 0 | 1: 902  | 1: 916  |
| Kahramanmaraş-Pazarcık'ta Meydana Gelen Deprem Hk. 10 | Response\Number           | 0 | 1 | 0 | 1: 902  | 1: 916  |
| Kahramanmaraş-Pazarcık'ta Meydana Gelen Deprem Hk. 10 | Disaster                  | 1 | 1 | 1 | 1: 1086 | 1: 1089 |
| Kahramanmaraş-Pazarcık'ta Meydana Gelen Deprem Hk. 10 | Disaster                  | 1 | 1 | 1 | 1: 1086 | 1: 1089 |
| Kahramanmaraş-Pazarcık'ta Meydana Gelen Deprem Hk. 10 | Disaster                  | 1 | 1 | 1 | 1: 1119 | 1: 1122 |
| Kahramanmaraş-Pazarcık'ta Meydana Gelen Deprem Hk. 10 | Disaster                  | 1 | 1 | 1 | 1: 1119 | 1: 1122 |
| Kahramanmaraş-Pazarcık'ta Meydana Gelen Deprem Hk. 10 | Response\Coast guard&Navy | 1 | 1 | 1 | 1: 1215 | 1: 1228 |
| Kahramanmaraş-Pazarcık'ta Meydana Gelen Deprem Hk. 10 | Response\Coast guard&Navy | 1 | 1 | 1 | 1: 1215 | 1: 1228 |
| Kahramanmaraş-Pazarcık'ta Meydana Gelen Deprem Hk. 10 | Response\Military         | 1 | 1 | 1 | 1: 1233 | 1: 1240 |
| Kahramanmaraş-Pazarcık'ta Meydana Gelen Deprem Hk. 10 | Response\Military         | 1 | 1 | 1 | 1: 1233 | 1: 1240 |
| Kahramanmaraş-Pazarcık'ta Meydana Gelen Deprem Hk. 10 | Shelter&meal\Evacuation   | 1 | 1 | 1 | 1: 1496 | 1: 1502 |
| Kahramanmaraş-Pazarcık'ta Meydana Gelen Deprem Hk. 10 | Shelter&meal\Evacuation   | 1 | 1 | 1 | 1: 1496 | 1: 1502 |

|                                                       |                            |   |   |   |         |         |
|-------------------------------------------------------|----------------------------|---|---|---|---------|---------|
| Kahramanmaraş-Pazarcık'ta Meydana Gelen Deprem Hk. 10 | Response\Coast guard&Navy  | 1 | 1 | 1 | 1: 1513 | 1: 1528 |
| Kahramanmaraş-Pazarcık'ta Meydana Gelen Deprem Hk. 10 | Response\Coast guard&Navy  | 1 | 1 | 1 | 1: 1513 | 1: 1528 |
| Kahramanmaraş-Pazarcık'ta Meydana Gelen Deprem Hk. 10 | Response\Coast guard&Navy  | 1 | 1 | 1 | 1: 1556 | 1: 1569 |
| Kahramanmaraş-Pazarcık'ta Meydana Gelen Deprem Hk. 10 | Response\Coast guard&Navy  | 1 | 1 | 1 | 1: 1556 | 1: 1569 |
| Kahramanmaraş-Pazarcık'ta Meydana Gelen Deprem Hk. 10 | Shelter&meal\Evacuation    | 1 | 1 | 1 | 1: 1652 | 1: 1658 |
| Kahramanmaraş-Pazarcık'ta Meydana Gelen Deprem Hk. 10 | Shelter&meal\Evacuation    | 1 | 1 | 1 | 1: 1652 | 1: 1658 |
| Kahramanmaraş-Pazarcık'ta Meydana Gelen Deprem Hk. 10 | Disaster                   | 1 | 1 | 1 | 1: 1815 | 1: 1818 |
| Kahramanmaraş-Pazarcık'ta Meydana Gelen Deprem Hk. 10 | Disaster                   | 1 | 1 | 1 | 1: 1815 | 1: 1818 |
| Kahramanmaraş-Pazarcık'ta Meydana Gelen Deprem Hk. 10 | AFAD                       | 1 | 1 | 1 | 1: 1830 | 1: 1833 |
| Kahramanmaraş-Pazarcık'ta Meydana Gelen Deprem Hk. 10 | AFAD                       | 1 | 1 | 1 | 1: 1830 | 1: 1833 |
| Kahramanmaraş-Pazarcık'ta Meydana Gelen Deprem Hk. 10 | Response\Welfare service   | 1 | 1 | 1 | 1: 1865 | 1: 1877 |
| Kahramanmaraş-Pazarcık'ta Meydana Gelen Deprem Hk. 10 | Response\Welfare service   | 1 | 1 | 1 | 1: 1865 | 1: 1877 |
| Kahramanmaraş-Pazarcık'ta Meydana Gelen Deprem Hk. 10 | Disaster                   | 1 | 1 | 1 | 1: 1983 | 1: 1986 |
| Kahramanmaraş-Pazarcık'ta Meydana Gelen Deprem Hk. 10 | Disaster                   | 1 | 1 | 1 | 1: 1983 | 1: 1986 |
| Kahramanmaraş-Pazarcık'ta Meydana Gelen Deprem Hk. 10 | Earthquake                 | 1 | 1 | 1 | 1: 2006 | 1: 2011 |
| Kahramanmaraş-Pazarcık'ta Meydana Gelen Deprem Hk. 10 | Earthquake                 | 1 | 1 | 1 | 1: 2006 | 1: 2011 |
| Kahramanmaraş-Pazarcık'ta Meydana Gelen Deprem Hk. 10 | Coordination\Communication | 1 | 1 | 1 | 1: 2104 | 1: 2111 |
| Kahramanmaraş-Pazarcık'ta Meydana Gelen Deprem Hk. 10 | Coordination\Communication | 1 | 1 | 1 | 1: 2104 | 1: 2111 |
| Kahramanmaraş-Pazarcık'ta Meydana Gelen Deprem Hk. 10 | Coordination\Communication | 1 | 1 | 1 | 1: 2421 | 1: 2428 |
| Kahramanmaraş-Pazarcık'ta Meydana Gelen Deprem Hk. 10 | Coordination\Communication | 1 | 1 | 1 | 1: 2421 | 1: 2428 |

|                                                              |                         |   |   |   |         |         |
|--------------------------------------------------------------|-------------------------|---|---|---|---------|---------|
| Kahramanmaraş-<br>Pazarcık'ta Meydana<br>Gelen Deprem Hk. 10 | Disaster                | 1 | 1 | 1 | 1: 2462 | 1: 2465 |
| Kahramanmaraş-<br>Pazarcık'ta Meydana<br>Gelen Deprem Hk. 10 | Disaster                | 1 | 1 | 1 | 1: 2462 | 1: 2465 |
| Kahramanmaraş-<br>Pazarcık'ta Meydana<br>Gelen Deprem Hk. 10 | Disaster                | 1 | 1 | 1 | 1: 2779 | 1: 2782 |
| Kahramanmaraş-<br>Pazarcık'ta Meydana<br>Gelen Deprem Hk. 10 | Disaster                | 1 | 1 | 1 | 1: 2779 | 1: 2782 |
| Kahramanmaraş-<br>Pazarcık'ta Meydana<br>Gelen Deprem Hk. 10 | Shelter&meal\Sheltering | 1 | 1 | 1 | 1: 2784 | 1: 2790 |
| Kahramanmaraş-<br>Pazarcık'ta Meydana<br>Gelen Deprem Hk. 10 | Shelter&meal\Sheltering | 1 | 1 | 1 | 1: 2784 | 1: 2790 |
| Kahramanmaraş-<br>Pazarcık'ta Meydana<br>Gelen Deprem Hk. 10 | AFAD                    | 1 | 1 | 1 | 1: 2837 | 1: 2840 |
| Kahramanmaraş-<br>Pazarcık'ta Meydana<br>Gelen Deprem Hk. 10 | AFAD                    | 1 | 1 | 1 | 1: 2837 | 1: 2840 |
| Kahramanmaraş-<br>Pazarcık'ta Meydana<br>Gelen Deprem Hk. 10 | Shelter&meal\Tent       | 1 | 1 | 1 | 1: 2853 | 1: 2857 |
| Kahramanmaraş-<br>Pazarcık'ta Meydana<br>Gelen Deprem Hk. 10 | Shelter&meal\Tent       | 1 | 1 | 1 | 1: 2853 | 1: 2857 |
| Kahramanmaraş-<br>Pazarcık'ta Meydana<br>Gelen Deprem Hk. 10 | Shelter&meal\Container  | 1 | 1 | 1 | 1: 2979 | 1: 2987 |
| Kahramanmaraş-<br>Pazarcık'ta Meydana<br>Gelen Deprem Hk. 10 | Shelter&meal\Container  | 1 | 1 | 1 | 1: 2979 | 1: 2987 |
| Kahramanmaraş-<br>Pazarcık'ta Meydana<br>Gelen Deprem Hk. 10 | Shelter&meal\Tent       | 1 | 1 | 1 | 1: 3008 | 1: 3012 |
| Kahramanmaraş-<br>Pazarcık'ta Meydana<br>Gelen Deprem Hk. 10 | Shelter&meal\Tent       | 1 | 1 | 1 | 1: 3008 | 1: 3012 |
| Kahramanmaraş-<br>Pazarcık'ta Meydana<br>Gelen Deprem Hk. 10 | Disaster                | 1 | 1 | 1 | 1: 3149 | 1: 3152 |
| Kahramanmaraş-<br>Pazarcık'ta Meydana<br>Gelen Deprem Hk. 10 | Disaster                | 1 | 1 | 1 | 1: 3149 | 1: 3152 |
| Kahramanmaraş-<br>Pazarcık'ta Meydana<br>Gelen Deprem Hk. 10 | Kahramanmaraş           | 1 | 0 | 0 | 2: 17   | 2: 29   |
| Kahramanmaraş-<br>Pazarcık'ta Meydana<br>Gelen Deprem Hk. 10 | Pazarcık                | 0 | 1 | 0 | 2: 17   | 2: 29   |
| Kahramanmaraş-<br>Pazarcık'ta Meydana<br>Gelen Deprem Hk. 10 | Earthquake              | 1 | 1 | 1 | 2: 57   | 2: 62   |
| Kahramanmaraş-<br>Pazarcık'ta Meydana<br>Gelen Deprem Hk. 10 | Earthquake              | 1 | 1 | 1 | 2: 57   | 2: 62   |

|                                                              |                               |   |   |   |        |        |
|--------------------------------------------------------------|-------------------------------|---|---|---|--------|--------|
| Kahramanmaraş-<br>Pazarcık'ta Meydana<br>Gelen Deprem Hk. 10 | AFAD                          | 1 | 1 | 1 | 2: 98  | 2: 101 |
| Kahramanmaraş-<br>Pazarcık'ta Meydana<br>Gelen Deprem Hk. 10 | AFAD                          | 1 | 1 | 1 | 2: 98  | 2: 101 |
| Kahramanmaraş-<br>Pazarcık'ta Meydana<br>Gelen Deprem Hk. 10 | Earthquake                    | 1 | 1 | 1 | 2: 149 | 2: 154 |
| Kahramanmaraş-<br>Pazarcık'ta Meydana<br>Gelen Deprem Hk. 10 | Earthquake                    | 1 | 1 | 1 | 2: 149 | 2: 154 |
| Kahramanmaraş-<br>Pazarcık'ta Meydana<br>Gelen Deprem Hk. 10 | Shelter&meal\Mobile kitchen   | 1 | 1 | 1 | 2: 211 | 2: 222 |
| Kahramanmaraş-<br>Pazarcık'ta Meydana<br>Gelen Deprem Hk. 10 | Shelter&meal\Mobile kitchen   | 1 | 1 | 1 | 2: 211 | 2: 222 |
| Kahramanmaraş-<br>Pazarcık'ta Meydana<br>Gelen Deprem Hk. 10 | Shelter&meal\Mobile bakery    | 1 | 1 | 1 | 2: 258 | 2: 268 |
| Kahramanmaraş-<br>Pazarcık'ta Meydana<br>Gelen Deprem Hk. 10 | Shelter&meal\Mobile bakery    | 1 | 1 | 1 | 2: 258 | 2: 268 |
| Kahramanmaraş-<br>Pazarcık'ta Meydana<br>Gelen Deprem Hk. 10 | Response\Military             | 1 | 1 | 1 | 2: 308 | 2: 315 |
| Kahramanmaraş-<br>Pazarcık'ta Meydana<br>Gelen Deprem Hk. 10 | Response\Military             | 1 | 1 | 1 | 2: 308 | 2: 315 |
| Kahramanmaraş-<br>Pazarcık'ta Meydana<br>Gelen Deprem Hk. 10 | Shelter&meal\Mobile bakery    | 1 | 1 | 1 | 2: 340 | 2: 350 |
| Kahramanmaraş-<br>Pazarcık'ta Meydana<br>Gelen Deprem Hk. 10 | Shelter&meal\Mobile bakery    | 1 | 1 | 1 | 2: 340 | 2: 350 |
| Kahramanmaraş-<br>Pazarcık'ta Meydana<br>Gelen Deprem Hk. 10 | Shelter&meal\Mobile kitchen   | 1 | 1 | 1 | 2: 408 | 2: 419 |
| Kahramanmaraş-<br>Pazarcık'ta Meydana<br>Gelen Deprem Hk. 10 | Shelter&meal\Mobile kitchen   | 1 | 1 | 1 | 2: 408 | 2: 419 |
| Kahramanmaraş-<br>Pazarcık'ta Meydana<br>Gelen Deprem Hk. 10 | Disaster                      | 1 | 1 | 1 | 2: 443 | 2: 446 |
| Kahramanmaraş-<br>Pazarcık'ta Meydana<br>Gelen Deprem Hk. 10 | Disaster                      | 1 | 1 | 1 | 2: 443 | 2: 446 |
| Kahramanmaraş-<br>Pazarcık'ta Meydana<br>Gelen Deprem Hk. 10 | Disaster                      | 1 | 1 | 1 | 2: 591 | 2: 594 |
| Kahramanmaraş-<br>Pazarcık'ta Meydana<br>Gelen Deprem Hk. 10 | Disaster                      | 1 | 1 | 1 | 2: 591 | 2: 594 |
| Kahramanmaraş-<br>Pazarcık'ta Meydana<br>Gelen Deprem Hk. 10 | Response\Psychosocial support | 1 | 1 | 1 | 2: 596 | 2: 605 |
| Kahramanmaraş-<br>Pazarcık'ta Meydana<br>Gelen Deprem Hk. 10 | Response\Psychosocial support | 1 | 1 | 1 | 2: 596 | 2: 605 |

|                                                       |                                 |   |   |   |         |         |
|-------------------------------------------------------|---------------------------------|---|---|---|---------|---------|
| Kahramanmaraş-Pazarcık'ta Meydana Gelen Deprem Hk. 10 | Response\Welfare service        | 1 | 1 | 1 | 2: 629  | 2: 641  |
| Kahramanmaraş-Pazarcık'ta Meydana Gelen Deprem Hk. 10 | Response\Welfare service        | 1 | 1 | 1 | 2: 629  | 2: 641  |
| Kahramanmaraş-Pazarcık'ta Meydana Gelen Deprem Hk. 10 | Kahramanmaraş                   | 1 | 0 | 0 | 2: 652  | 2: 664  |
| Kahramanmaraş-Pazarcık'ta Meydana Gelen Deprem Hk. 10 | Pazarcık                        | 0 | 1 | 0 | 2: 652  | 2: 664  |
| Kahramanmaraş-Pazarcık'ta Meydana Gelen Deprem Hk. 10 | Disaster                        | 1 | 1 | 1 | 2: 778  | 2: 781  |
| Kahramanmaraş-Pazarcık'ta Meydana Gelen Deprem Hk. 10 | Disaster                        | 1 | 1 | 1 | 2: 778  | 2: 781  |
| Kahramanmaraş-Pazarcık'ta Meydana Gelen Deprem Hk. 10 | Kahramanmaraş                   | 1 | 0 | 0 | 2: 961  | 2: 973  |
| Kahramanmaraş-Pazarcık'ta Meydana Gelen Deprem Hk. 10 | Pazarcık                        | 0 | 1 | 0 | 2: 961  | 2: 973  |
| Kahramanmaraş-Pazarcık'ta Meydana Gelen Deprem Hk. 10 | Emergency                       | 1 | 1 | 1 | 2: 1234 | 2: 1243 |
| Kahramanmaraş-Pazarcık'ta Meydana Gelen Deprem Hk. 10 | Emergency                       | 1 | 1 | 1 | 2: 1234 | 2: 1243 |
| Kahramanmaraş-Pazarcık'ta Meydana Gelen Deprem Hk. 10 | Disaster                        | 1 | 1 | 1 | 2: 1754 | 2: 1757 |
| Kahramanmaraş-Pazarcık'ta Meydana Gelen Deprem Hk. 10 | Disaster                        | 1 | 1 | 1 | 2: 1754 | 2: 1757 |
| Kahramanmaraş-Pazarcık'ta Meydana Gelen Deprem Hk. 10 | Disaster                        | 1 | 1 | 1 | 2: 1775 | 2: 1778 |
| Kahramanmaraş-Pazarcık'ta Meydana Gelen Deprem Hk. 10 | Disaster                        | 1 | 1 | 1 | 2: 1775 | 2: 1778 |
| Kahramanmaraş-Pazarcık'ta Meydana Gelen Deprem Hk. 10 | Coordination\Coordination       | 1 | 1 | 1 | 2: 1834 | 2: 1845 |
| Kahramanmaraş-Pazarcık'ta Meydana Gelen Deprem Hk. 10 | Coordination\Coordination       | 1 | 1 | 1 | 2: 1834 | 2: 1845 |
| Kahramanmaraş-Pazarcık'ta Meydana Gelen Deprem Hk. 10 | Coordination\Social media       | 1 | 0 | 0 | 2: 1976 | 2: 1987 |
| Kahramanmaraş-Pazarcık'ta Meydana Gelen Deprem Hk. 10 | Coordination\Social media usage | 0 | 1 | 0 | 2: 1976 | 2: 1987 |
| Kahramanmaraş-Pazarcık'ta Meydana Gelen Deprem Hk. 10 | Coordination\Disinformation     | 1 | 1 | 1 | 2: 2047 | 2: 2060 |
| Kahramanmaraş-Pazarcık'ta Meydana Gelen Deprem Hk. 10 | Coordination\Disinformation     | 1 | 1 | 1 | 2: 2047 | 2: 2060 |

|                                                              |                               |   |   |   |         |         |
|--------------------------------------------------------------|-------------------------------|---|---|---|---------|---------|
| Kahramanmaraş-<br>Pazarcık'ta Meydana<br>Gelen Deprem Hk. 10 | Earthquake                    | 1 | 1 | 1 | 2: 2166 | 2: 2171 |
| Kahramanmaraş-<br>Pazarcık'ta Meydana<br>Gelen Deprem Hk. 10 | Earthquake                    | 1 | 1 | 1 | 2: 2166 | 2: 2171 |
| Kahramanmaraş-<br>Pazarcık'ta Meydana<br>Gelen Deprem Hk. 10 | AFAD                          | 1 | 1 | 1 | 2: 2286 | 2: 2289 |
| Kahramanmaraş-<br>Pazarcık'ta Meydana<br>Gelen Deprem Hk. 10 | AFAD                          | 1 | 1 | 1 | 2: 2286 | 2: 2289 |
| Kahramanmaraş-<br>Pazarcık'ta Meydana<br>Gelen Deprem Hk. 10 | Disaster                      | 1 | 1 | 1 | 2: 2582 | 2: 2585 |
| Kahramanmaraş-<br>Pazarcık'ta Meydana<br>Gelen Deprem Hk. 10 | Disaster                      | 1 | 1 | 1 | 2: 2582 | 2: 2585 |
| Kahramanmaraş-<br>Pazarcık'ta Meydana<br>Gelen Deprem Hk. 10 | Coordination\Public relations | 1 | 1 | 1 | 2: 2741 | 2: 2746 |
| Kahramanmaraş-<br>Pazarcık'ta Meydana<br>Gelen Deprem Hk. 10 | Coordination\Public relations | 1 | 1 | 1 | 2: 2741 | 2: 2746 |
| Kahramanmaraş-<br>Pazarcık'ta Meydana<br>Gelen Deprem Hk. 10 | Kahramanmaraş                 | 1 | 0 | 0 | 3: 17   | 3: 29   |
| Kahramanmaraş-<br>Pazarcık'ta Meydana<br>Gelen Deprem Hk. 10 | Pazarcık                      | 0 | 1 | 0 | 3: 17   | 3: 29   |
| Kahramanmaraş-<br>Pazarcık'ta Meydana<br>Gelen Deprem Hk. 10 | Earthquake                    | 1 | 1 | 1 | 3: 57   | 3: 62   |
| Kahramanmaraş-<br>Pazarcık'ta Meydana<br>Gelen Deprem Hk. 10 | Earthquake                    | 1 | 1 | 1 | 3: 57   | 3: 62   |
| Kahramanmaraş-<br>Pazarcık'ta Meydana<br>Gelen Deprem Hk. 10 | AFAD                          | 1 | 1 | 1 | 3: 98   | 3: 101  |
| Kahramanmaraş-<br>Pazarcık'ta Meydana<br>Gelen Deprem Hk. 10 | AFAD                          | 1 | 1 | 1 | 3: 98   | 3: 101  |
| Kahramanmaraş-<br>Pazarcık'ta Meydana<br>Gelen Deprem Hk. 10 | Earthquake                    | 1 | 1 | 1 | 3: 149  | 3: 154  |
| Kahramanmaraş-<br>Pazarcık'ta Meydana<br>Gelen Deprem Hk. 10 | Earthquake                    | 1 | 1 | 1 | 3: 149  | 3: 154  |
| Kahramanmaraş-<br>Pazarcık'ta Meydana<br>Gelen Deprem Hk. 10 | AFAD                          | 1 | 1 | 1 | 3: 190  | 3: 193  |
| Kahramanmaraş-<br>Pazarcık'ta Meydana<br>Gelen Deprem Hk. 10 | AFAD                          | 1 | 1 | 1 | 3: 190  | 3: 193  |
| Kahramanmaraş-<br>Pazarcık'ta Meydana<br>Gelen Deprem Hk. 10 | AFAD                          | 1 | 1 | 1 | 3: 248  | 3: 251  |
| Kahramanmaraş-<br>Pazarcık'ta Meydana<br>Gelen Deprem Hk. 10 | AFAD                          | 1 | 1 | 1 | 3: 248  | 3: 251  |

|                                                              |                                 |   |   |   |        |        |
|--------------------------------------------------------------|---------------------------------|---|---|---|--------|--------|
| Kahramanmaraş-<br>Pazarcık'ta Meydana<br>Gelen Deprem Hk. 10 | AFAD                            | 1 | 1 | 1 | 3: 365 | 3: 368 |
| Kahramanmaraş-<br>Pazarcık'ta Meydana<br>Gelen Deprem Hk. 10 | AFAD                            | 1 | 1 | 1 | 3: 365 | 3: 368 |
| Kahramanmaraş-<br>Pazarcık'ta Meydana<br>Gelen Deprem Hk. 10 | Response\Search&Rescue          | 1 | 1 | 1 | 3: 459 | 3: 472 |
| Kahramanmaraş-<br>Pazarcık'ta Meydana<br>Gelen Deprem Hk. 10 | Response\Search&Rescue          | 1 | 1 | 1 | 3: 459 | 3: 472 |
| Kahramanmaraş-<br>Pazarcık'ta Meydana<br>Gelen Deprem Hk. 10 | Disaster                        | 1 | 1 | 1 | 3: 523 | 3: 526 |
| Kahramanmaraş-<br>Pazarcık'ta Meydana<br>Gelen Deprem Hk. 10 | Disaster                        | 1 | 1 | 1 | 3: 523 | 3: 526 |
| Kahramanmaraş-<br>Pazarcık'ta Meydana<br>Gelen Deprem Hk. 10 | AFAD                            | 1 | 1 | 1 | 3: 541 | 3: 544 |
| Kahramanmaraş-<br>Pazarcık'ta Meydana<br>Gelen Deprem Hk. 10 | AFAD                            | 1 | 1 | 1 | 3: 541 | 3: 544 |
| Kahramanmaraş-<br>Pazarcık'ta Meydana<br>Gelen Deprem Hk. 10 | Preparedness\Preparedness       | 1 | 1 | 1 | 3: 605 | 3: 615 |
| Kahramanmaraş-<br>Pazarcık'ta Meydana<br>Gelen Deprem Hk. 10 | Preparedness\Preparedness       | 1 | 1 | 1 | 3: 605 | 3: 615 |
| Kahramanmaraş-<br>Pazarcık'ta Meydana<br>Gelen Deprem Hk. 10 | Disaster                        | 1 | 1 | 1 | 3: 605 | 3: 608 |
| Kahramanmaraş-<br>Pazarcık'ta Meydana<br>Gelen Deprem Hk. 10 | Disaster                        | 1 | 1 | 1 | 3: 605 | 3: 608 |
| Kahramanmaraş-<br>Pazarcık'ta Meydana<br>Gelen Deprem Hk. 10 | Disaster                        | 1 | 1 | 1 | 3: 653 | 3: 656 |
| Kahramanmaraş-<br>Pazarcık'ta Meydana<br>Gelen Deprem Hk. 10 | Disaster                        | 1 | 1 | 1 | 3: 653 | 3: 656 |
| Kahramanmaraş-<br>Pazarcık'ta Meydana<br>Gelen Deprem Hk. 10 | Recovery\Fund drive             | 1 | 1 | 1 | 3: 714 | 3: 732 |
| Kahramanmaraş-<br>Pazarcık'ta Meydana<br>Gelen Deprem Hk. 10 | Recovery\Fund drive             | 1 | 1 | 1 | 3: 714 | 3: 732 |
| Kahramanmaraş-<br>Pazarcık'ta Meydana<br>Gelen Deprem Hk. 10 | Coordination\Social media       | 1 | 0 | 0 | 3: 830 | 3: 841 |
| Kahramanmaraş-<br>Pazarcık'ta Meydana<br>Gelen Deprem Hk. 10 | Coordination\Social media usage | 0 | 1 | 0 | 3: 830 | 3: 841 |
| Kahramanmaraş-<br>Pazarcık'ta Meydana<br>Gelen Deprem Hk. 10 | AFAD                            | 1 | 1 | 1 | 3: 886 | 3: 889 |
| Kahramanmaraş-<br>Pazarcık'ta Meydana<br>Gelen Deprem Hk. 10 | AFAD                            | 1 | 1 | 1 | 3: 886 | 3: 889 |

|                                                              |                                 |   |   |   |         |         |
|--------------------------------------------------------------|---------------------------------|---|---|---|---------|---------|
| Kahramanmaraş-<br>Pazarcık'ta Meydana<br>Gelen Deprem Hk. 10 | AFAD                            | 1 | 1 | 1 | 3: 908  | 3: 911  |
| Kahramanmaraş-<br>Pazarcık'ta Meydana<br>Gelen Deprem Hk. 10 | AFAD                            | 1 | 1 | 1 | 3: 908  | 3: 911  |
| Kahramanmaraş-<br>Pazarcık'ta Meydana<br>Gelen Deprem Hk. 10 | Coordination\Information        | 1 | 1 | 1 | 3: 953  | 3: 964  |
| Kahramanmaraş-<br>Pazarcık'ta Meydana<br>Gelen Deprem Hk. 10 | Coordination\Information        | 1 | 1 | 1 | 3: 953  | 3: 964  |
| Kahramanmaraş-<br>Pazarcık'ta Meydana<br>Gelen Deprem Hk. 10 | Recovery\Peacemaking            | 1 | 1 | 1 | 3: 969  | 3: 978  |
| Kahramanmaraş-<br>Pazarcık'ta Meydana<br>Gelen Deprem Hk. 10 | Recovery\Peacemaking            | 1 | 1 | 1 | 3: 969  | 3: 978  |
| Kahramanmaraş-<br>Pazarcık'ta Meydana<br>Gelen Deprem Hk. 10 | Coordination\Social media       | 1 | 0 | 0 | 3: 1025 | 3: 1036 |
| Kahramanmaraş-<br>Pazarcık'ta Meydana<br>Gelen Deprem Hk. 10 | Coordination\Social media usage | 0 | 1 | 0 | 3: 1025 | 3: 1036 |
| Kahramanmaraş-<br>Pazarcık'ta Meydana<br>Gelen Deprem Hk. 10 | Disaster                        | 1 | 1 | 1 | 3: 1127 | 3: 1130 |
| Kahramanmaraş-<br>Pazarcık'ta Meydana<br>Gelen Deprem Hk. 10 | Disaster                        | 1 | 1 | 1 | 3: 1127 | 3: 1130 |
| Kahramanmaraş-<br>Pazarcık'ta Meydana<br>Gelen Deprem Hk. 10 | Emergency                       | 1 | 1 | 1 | 3: 1135 | 3: 1144 |
| Kahramanmaraş-<br>Pazarcık'ta Meydana<br>Gelen Deprem Hk. 10 | Emergency                       | 1 | 1 | 1 | 3: 1135 | 3: 1144 |
| Kahramanmaraş-<br>Pazarcık'ta Meydana<br>Gelen Deprem Hk. 11 | Kahramanmaraş                   | 1 | 0 | 0 | 1: 17   | 1: 29   |
| Kahramanmaraş-<br>Pazarcık'ta Meydana<br>Gelen Deprem Hk. 11 | Pazarcık                        | 0 | 1 | 0 | 1: 17   | 1: 29   |
| Kahramanmaraş-<br>Pazarcık'ta Meydana<br>Gelen Deprem Hk. 11 | Earthquake                      | 1 | 1 | 1 | 1: 57   | 1: 62   |
| Kahramanmaraş-<br>Pazarcık'ta Meydana<br>Gelen Deprem Hk. 11 | Earthquake                      | 1 | 1 | 1 | 1: 57   | 1: 62   |
| Kahramanmaraş-<br>Pazarcık'ta Meydana<br>Gelen Deprem Hk. 11 | AFAD                            | 1 | 1 | 1 | 1: 98   | 1: 101  |
| Kahramanmaraş-<br>Pazarcık'ta Meydana<br>Gelen Deprem Hk. 11 | AFAD                            | 1 | 1 | 1 | 1: 98   | 1: 101  |
| Kahramanmaraş-<br>Pazarcık'ta Meydana<br>Gelen Deprem Hk. 11 | Earthquake                      | 1 | 1 | 1 | 1: 149  | 1: 154  |
| Kahramanmaraş-<br>Pazarcık'ta Meydana<br>Gelen Deprem Hk. 11 | Earthquake                      | 1 | 1 | 1 | 1: 149  | 1: 154  |



|                                                              |               |   |   |   |        |        |
|--------------------------------------------------------------|---------------|---|---|---|--------|--------|
| Kahramanmaraş-<br>Pazarcık'ta Meydana<br>Gelen Deprem Hk. 11 | Kahramanmaraş | 1 | 0 | 0 | 1: 180 | 1: 192 |
| Kahramanmaraş-<br>Pazarcık'ta Meydana<br>Gelen Deprem Hk. 11 | Pazarcık      | 0 | 1 | 0 | 1: 180 | 1: 192 |
| Kahramanmaraş-<br>Pazarcık'ta Meydana<br>Gelen Deprem Hk. 11 | Earthquake    | 1 | 1 | 1 | 1: 220 | 1: 225 |
| Kahramanmaraş-<br>Pazarcık'ta Meydana<br>Gelen Deprem Hk. 11 | Earthquake    | 1 | 1 | 1 | 1: 220 | 1: 225 |
| Kahramanmaraş-<br>Pazarcık'ta Meydana<br>Gelen Deprem Hk. 11 | Kahramanmaraş | 1 | 0 | 0 | 1: 299 | 1: 311 |
| Kahramanmaraş-<br>Pazarcık'ta Meydana<br>Gelen Deprem Hk. 11 | Pazarcık      | 0 | 1 | 0 | 1: 299 | 1: 311 |
| Kahramanmaraş-<br>Pazarcık'ta Meydana<br>Gelen Deprem Hk. 11 | Earthquake    | 1 | 1 | 1 | 1: 339 | 1: 344 |
| Kahramanmaraş-<br>Pazarcık'ta Meydana<br>Gelen Deprem Hk. 11 | Earthquake    | 1 | 1 | 1 | 1: 339 | 1: 344 |
| Kahramanmaraş-<br>Pazarcık'ta Meydana<br>Gelen Deprem Hk. 11 | Kahramanmaraş | 1 | 0 | 0 | 1: 408 | 1: 420 |
| Kahramanmaraş-<br>Pazarcık'ta Meydana<br>Gelen Deprem Hk. 11 | Pazarcık      | 0 | 1 | 0 | 1: 408 | 1: 420 |
| Kahramanmaraş-<br>Pazarcık'ta Meydana<br>Gelen Deprem Hk. 11 | Earthquake    | 1 | 1 | 1 | 1: 466 | 1: 471 |
| Kahramanmaraş-<br>Pazarcık'ta Meydana<br>Gelen Deprem Hk. 11 | Earthquake    | 1 | 1 | 1 | 1: 466 | 1: 471 |
| Kahramanmaraş-<br>Pazarcık'ta Meydana<br>Gelen Deprem Hk. 11 | Earthquake    | 1 | 1 | 1 | 1: 496 | 1: 501 |
| Kahramanmaraş-<br>Pazarcık'ta Meydana<br>Gelen Deprem Hk. 11 | Earthquake    | 1 | 1 | 1 | 1: 496 | 1: 501 |
| Kahramanmaraş-<br>Pazarcık'ta Meydana<br>Gelen Deprem Hk. 11 | Earthquake    | 1 | 1 | 1 | 1: 586 | 1: 591 |
| Kahramanmaraş-<br>Pazarcık'ta Meydana<br>Gelen Deprem Hk. 11 | Earthquake    | 1 | 1 | 1 | 1: 586 | 1: 591 |
| Kahramanmaraş-<br>Pazarcık'ta Meydana<br>Gelen Deprem Hk. 11 | Kahramanmaraş | 1 | 0 | 0 | 1: 659 | 1: 671 |
| Kahramanmaraş-<br>Pazarcık'ta Meydana<br>Gelen Deprem Hk. 11 | Pazarcık      | 0 | 1 | 0 | 1: 659 | 1: 671 |
| Kahramanmaraş-<br>Pazarcık'ta Meydana<br>Gelen Deprem Hk. 11 | AFAD          | 1 | 1 | 1 | 1: 869 | 1: 872 |
| Kahramanmaraş-<br>Pazarcık'ta Meydana<br>Gelen Deprem Hk. 11 | AFAD          | 1 | 1 | 1 | 1: 869 | 1: 872 |

|                                                       |                           |   |   |   |         |         |
|-------------------------------------------------------|---------------------------|---|---|---|---------|---------|
| Kahramanmaraş-Pazarcık'ta Meydana Gelen Deprem Hk. 11 | Response\Military         | 1 | 1 | 1 | 1: 880  | 1: 887  |
| Kahramanmaraş-Pazarcık'ta Meydana Gelen Deprem Hk. 11 | Response\Military         | 1 | 1 | 1 | 1: 880  | 1: 887  |
| Kahramanmaraş-Pazarcık'ta Meydana Gelen Deprem Hk. 11 | Response\Search&Rescue    | 1 | 1 | 1 | 1: 1065 | 1: 1078 |
| Kahramanmaraş-Pazarcık'ta Meydana Gelen Deprem Hk. 11 | Response\Search&Rescue    | 1 | 1 | 1 | 1: 1065 | 1: 1078 |
| Kahramanmaraş-Pazarcık'ta Meydana Gelen Deprem Hk. 11 | Disaster                  | 1 | 1 | 1 | 1: 1260 | 1: 1263 |
| Kahramanmaraş-Pazarcık'ta Meydana Gelen Deprem Hk. 11 | Disaster                  | 1 | 1 | 1 | 1: 1260 | 1: 1263 |
| Kahramanmaraş-Pazarcık'ta Meydana Gelen Deprem Hk. 11 | Disaster                  | 1 | 1 | 1 | 1: 1293 | 1: 1296 |
| Kahramanmaraş-Pazarcık'ta Meydana Gelen Deprem Hk. 11 | Disaster                  | 1 | 1 | 1 | 1: 1293 | 1: 1296 |
| Kahramanmaraş-Pazarcık'ta Meydana Gelen Deprem Hk. 11 | Disaster                  | 1 | 1 | 1 | 1: 1457 | 1: 1460 |
| Kahramanmaraş-Pazarcık'ta Meydana Gelen Deprem Hk. 11 | Disaster                  | 1 | 1 | 1 | 1: 1457 | 1: 1460 |
| Kahramanmaraş-Pazarcık'ta Meydana Gelen Deprem Hk. 11 | Response\Coast guard&Navy | 1 | 1 | 1 | 1: 1565 | 1: 1578 |
| Kahramanmaraş-Pazarcık'ta Meydana Gelen Deprem Hk. 11 | Response\Coast guard&Navy | 1 | 1 | 1 | 1: 1565 | 1: 1578 |
| Kahramanmaraş-Pazarcık'ta Meydana Gelen Deprem Hk. 11 | Response\Military         | 1 | 1 | 1 | 1: 1583 | 1: 1590 |
| Kahramanmaraş-Pazarcık'ta Meydana Gelen Deprem Hk. 11 | Response\Military         | 1 | 1 | 1 | 1: 1583 | 1: 1590 |
| Kahramanmaraş-Pazarcık'ta Meydana Gelen Deprem Hk. 11 | Shelter&meal\Evacuation   | 1 | 1 | 1 | 1: 1786 | 1: 1792 |
| Kahramanmaraş-Pazarcık'ta Meydana Gelen Deprem Hk. 11 | Shelter&meal\Evacuation   | 1 | 1 | 1 | 1: 1786 | 1: 1792 |
| Kahramanmaraş-Pazarcık'ta Meydana Gelen Deprem Hk. 11 | Response\Coast guard&Navy | 1 | 1 | 1 | 1: 1803 | 1: 1818 |
| Kahramanmaraş-Pazarcık'ta Meydana Gelen Deprem Hk. 11 | Response\Coast guard&Navy | 1 | 1 | 1 | 1: 1803 | 1: 1818 |
| Kahramanmaraş-Pazarcık'ta Meydana Gelen Deprem Hk. 11 | Response\Coast guard&Navy | 1 | 1 | 1 | 1: 1846 | 1: 1859 |
| Kahramanmaraş-Pazarcık'ta Meydana Gelen Deprem Hk. 11 | Response\Coast guard&Navy | 1 | 1 | 1 | 1: 1846 | 1: 1859 |

|                                                              |                          |   |   |   |         |         |
|--------------------------------------------------------------|--------------------------|---|---|---|---------|---------|
| Kahramanmaraş-<br>Pazarcık'ta Meydana<br>Gelen Deprem Hk. 11 | Shelter&meal\Evacuation  | 1 | 1 | 1 | 1: 1942 | 1: 1948 |
| Kahramanmaraş-<br>Pazarcık'ta Meydana<br>Gelen Deprem Hk. 11 | Shelter&meal\Evacuation  | 1 | 1 | 1 | 1: 1942 | 1: 1948 |
| Kahramanmaraş-<br>Pazarcık'ta Meydana<br>Gelen Deprem Hk. 11 | Disaster                 | 1 | 1 | 1 | 1: 2092 | 1: 2095 |
| Kahramanmaraş-<br>Pazarcık'ta Meydana<br>Gelen Deprem Hk. 11 | Disaster                 | 1 | 1 | 1 | 1: 2092 | 1: 2095 |
| Kahramanmaraş-<br>Pazarcık'ta Meydana<br>Gelen Deprem Hk. 11 | AFAD                     | 1 | 1 | 1 | 1: 2107 | 1: 2110 |
| Kahramanmaraş-<br>Pazarcık'ta Meydana<br>Gelen Deprem Hk. 11 | AFAD                     | 1 | 1 | 1 | 1: 2107 | 1: 2110 |
| Kahramanmaraş-<br>Pazarcık'ta Meydana<br>Gelen Deprem Hk. 11 | Response\Welfare service | 1 | 1 | 1 | 1: 2146 | 1: 2158 |
| Kahramanmaraş-<br>Pazarcık'ta Meydana<br>Gelen Deprem Hk. 11 | Response\Welfare service | 1 | 1 | 1 | 1: 2146 | 1: 2158 |
| Kahramanmaraş-<br>Pazarcık'ta Meydana<br>Gelen Deprem Hk. 11 | Emergency                | 1 | 1 | 1 | 1: 2234 | 1: 2243 |
| Kahramanmaraş-<br>Pazarcık'ta Meydana<br>Gelen Deprem Hk. 11 | Emergency                | 1 | 1 | 1 | 1: 2234 | 1: 2243 |
| Kahramanmaraş-<br>Pazarcık'ta Meydana<br>Gelen Deprem Hk. 11 | Disaster                 | 1 | 1 | 1 | 1: 2270 | 1: 2273 |
| Kahramanmaraş-<br>Pazarcık'ta Meydana<br>Gelen Deprem Hk. 11 | Disaster                 | 1 | 1 | 1 | 1: 2270 | 1: 2273 |
| Kahramanmaraş-<br>Pazarcık'ta Meydana<br>Gelen Deprem Hk. 11 | Shelter&meal\Sheltering  | 1 | 1 | 1 | 1: 2275 | 1: 2281 |
| Kahramanmaraş-<br>Pazarcık'ta Meydana<br>Gelen Deprem Hk. 11 | Shelter&meal\Sheltering  | 1 | 1 | 1 | 1: 2275 | 1: 2281 |
| Kahramanmaraş-<br>Pazarcık'ta Meydana<br>Gelen Deprem Hk. 11 | AFAD                     | 1 | 1 | 1 | 1: 2328 | 1: 2331 |
| Kahramanmaraş-<br>Pazarcık'ta Meydana<br>Gelen Deprem Hk. 11 | AFAD                     | 1 | 1 | 1 | 1: 2328 | 1: 2331 |
| Kahramanmaraş-<br>Pazarcık'ta Meydana<br>Gelen Deprem Hk. 11 | Shelter&meal\Tent        | 1 | 1 | 1 | 1: 2344 | 1: 2348 |
| Kahramanmaraş-<br>Pazarcık'ta Meydana<br>Gelen Deprem Hk. 11 | Shelter&meal\Tent        | 1 | 1 | 1 | 1: 2344 | 1: 2348 |
| Kahramanmaraş-<br>Pazarcık'ta Meydana<br>Gelen Deprem Hk. 11 | Shelter&meal\Container   | 1 | 1 | 1 | 1: 2470 | 1: 2478 |
| Kahramanmaraş-<br>Pazarcık'ta Meydana<br>Gelen Deprem Hk. 11 | Shelter&meal\Container   | 1 | 1 | 1 | 1: 2470 | 1: 2478 |

|                                                              |                                |   |   |   |         |         |
|--------------------------------------------------------------|--------------------------------|---|---|---|---------|---------|
| Kahramanmaraş-<br>Pazarcık'ta Meydana<br>Gelen Deprem Hk. 11 | Shelter&meal\\Tent             | 1 | 1 | 1 | 1: 2499 | 1: 2503 |
| Kahramanmaraş-<br>Pazarcık'ta Meydana<br>Gelen Deprem Hk. 11 | Shelter&meal\\Tent             | 1 | 1 | 1 | 1: 2499 | 1: 2503 |
| Kahramanmaraş-<br>Pazarcık'ta Meydana<br>Gelen Deprem Hk. 11 | Disaster                       | 1 | 1 | 1 | 1: 2522 | 1: 2525 |
| Kahramanmaraş-<br>Pazarcık'ta Meydana<br>Gelen Deprem Hk. 11 | Disaster                       | 1 | 1 | 1 | 1: 2522 | 1: 2525 |
| Kahramanmaraş-<br>Pazarcık'ta Meydana<br>Gelen Deprem Hk. 11 | Shelter&meal\\Mobile kitchen   | 1 | 1 | 1 | 1: 2574 | 1: 2585 |
| Kahramanmaraş-<br>Pazarcık'ta Meydana<br>Gelen Deprem Hk. 11 | Shelter&meal\\Mobile kitchen   | 1 | 1 | 1 | 1: 2574 | 1: 2585 |
| Kahramanmaraş-<br>Pazarcık'ta Meydana<br>Gelen Deprem Hk. 11 | Shelter&meal\\Mobile bakery    | 1 | 1 | 1 | 1: 2621 | 1: 2631 |
| Kahramanmaraş-<br>Pazarcık'ta Meydana<br>Gelen Deprem Hk. 11 | Shelter&meal\\Mobile bakery    | 1 | 1 | 1 | 1: 2621 | 1: 2631 |
| Kahramanmaraş-<br>Pazarcık'ta Meydana<br>Gelen Deprem Hk. 11 | Response\\Military             | 1 | 1 | 1 | 1: 2671 | 1: 2678 |
| Kahramanmaraş-<br>Pazarcık'ta Meydana<br>Gelen Deprem Hk. 11 | Response\\Military             | 1 | 1 | 1 | 1: 2671 | 1: 2678 |
| Kahramanmaraş-<br>Pazarcık'ta Meydana<br>Gelen Deprem Hk. 11 | Shelter&meal\\Mobile bakery    | 1 | 1 | 1 | 1: 2703 | 1: 2713 |
| Kahramanmaraş-<br>Pazarcık'ta Meydana<br>Gelen Deprem Hk. 11 | Shelter&meal\\Mobile bakery    | 1 | 1 | 1 | 1: 2703 | 1: 2713 |
| Kahramanmaraş-<br>Pazarcık'ta Meydana<br>Gelen Deprem Hk. 11 | Shelter&meal\\Mobile kitchen   | 1 | 1 | 1 | 1: 2771 | 1: 2782 |
| Kahramanmaraş-<br>Pazarcık'ta Meydana<br>Gelen Deprem Hk. 11 | Shelter&meal\\Mobile kitchen   | 1 | 1 | 1 | 1: 2771 | 1: 2782 |
| Kahramanmaraş-<br>Pazarcık'ta Meydana<br>Gelen Deprem Hk. 11 | Disaster                       | 1 | 1 | 1 | 1: 2806 | 1: 2809 |
| Kahramanmaraş-<br>Pazarcık'ta Meydana<br>Gelen Deprem Hk. 11 | Disaster                       | 1 | 1 | 1 | 1: 2806 | 1: 2809 |
| Kahramanmaraş-<br>Pazarcık'ta Meydana<br>Gelen Deprem Hk. 11 | Disaster                       | 1 | 1 | 1 | 1: 2954 | 1: 2957 |
| Kahramanmaraş-<br>Pazarcık'ta Meydana<br>Gelen Deprem Hk. 11 | Disaster                       | 1 | 1 | 1 | 1: 2954 | 1: 2957 |
| Kahramanmaraş-<br>Pazarcık'ta Meydana<br>Gelen Deprem Hk. 11 | Response\\Psychosocial support | 1 | 1 | 1 | 1: 2959 | 1: 2968 |
| Kahramanmaraş-<br>Pazarcık'ta Meydana<br>Gelen Deprem Hk. 11 | Response\\Psychosocial support | 1 | 1 | 1 | 1: 2959 | 1: 2968 |

|                                                       |                                 |   |   |   |         |         |
|-------------------------------------------------------|---------------------------------|---|---|---|---------|---------|
| Kahramanmaraş-Pazarcık'ta Meydana Gelen Deprem Hk. 11 | Response\Welfare service        | 1 | 1 | 1 | 1: 2992 | 1: 3004 |
| Kahramanmaraş-Pazarcık'ta Meydana Gelen Deprem Hk. 11 | Response\Welfare service        | 1 | 1 | 1 | 1: 2992 | 1: 3004 |
| Kahramanmaraş-Pazarcık'ta Meydana Gelen Deprem Hk. 11 | Kahramanmaraş                   | 1 | 0 | 0 | 1: 3015 | 1: 3027 |
| Kahramanmaraş-Pazarcık'ta Meydana Gelen Deprem Hk. 11 | Pazarcık                        | 0 | 1 | 0 | 1: 3015 | 1: 3027 |
| Kahramanmaraş-Pazarcık'ta Meydana Gelen Deprem Hk. 11 | Disaster                        | 1 | 1 | 1 | 1: 3141 | 1: 3144 |
| Kahramanmaraş-Pazarcık'ta Meydana Gelen Deprem Hk. 11 | Disaster                        | 1 | 1 | 1 | 1: 3141 | 1: 3144 |
| Kahramanmaraş-Pazarcık'ta Meydana Gelen Deprem Hk. 11 | Kahramanmaraş                   | 1 | 0 | 0 | 2: 17   | 2: 29   |
| Kahramanmaraş-Pazarcık'ta Meydana Gelen Deprem Hk. 11 | Pazarcık                        | 0 | 1 | 0 | 2: 17   | 2: 29   |
| Kahramanmaraş-Pazarcık'ta Meydana Gelen Deprem Hk. 11 | Earthquake                      | 1 | 1 | 1 | 2: 57   | 2: 62   |
| Kahramanmaraş-Pazarcık'ta Meydana Gelen Deprem Hk. 11 | Earthquake                      | 1 | 1 | 1 | 2: 57   | 2: 62   |
| Kahramanmaraş-Pazarcık'ta Meydana Gelen Deprem Hk. 11 | AFAD                            | 1 | 1 | 1 | 2: 98   | 2: 101  |
| Kahramanmaraş-Pazarcık'ta Meydana Gelen Deprem Hk. 11 | AFAD                            | 1 | 1 | 1 | 2: 98   | 2: 101  |
| Kahramanmaraş-Pazarcık'ta Meydana Gelen Deprem Hk. 11 | Earthquake                      | 1 | 1 | 1 | 2: 149  | 2: 154  |
| Kahramanmaraş-Pazarcık'ta Meydana Gelen Deprem Hk. 11 | Earthquake                      | 1 | 1 | 1 | 2: 149  | 2: 154  |
| Kahramanmaraş-Pazarcık'ta Meydana Gelen Deprem Hk. 11 | Disaster                        | 1 | 1 | 1 | 2: 180  | 2: 183  |
| Kahramanmaraş-Pazarcık'ta Meydana Gelen Deprem Hk. 11 | Disaster                        | 1 | 1 | 1 | 2: 180  | 2: 183  |
| Kahramanmaraş-Pazarcık'ta Meydana Gelen Deprem Hk. 11 | Coordination\Coordination       | 1 | 1 | 1 | 2: 239  | 2: 250  |
| Kahramanmaraş-Pazarcık'ta Meydana Gelen Deprem Hk. 11 | Coordination\Coordination       | 1 | 1 | 1 | 2: 239  | 2: 250  |
| Kahramanmaraş-Pazarcık'ta Meydana Gelen Deprem Hk. 11 | Coordination\Social media       | 1 | 0 | 0 | 2: 381  | 2: 392  |
| Kahramanmaraş-Pazarcık'ta Meydana Gelen Deprem Hk. 11 | Coordination\Social media usage | 0 | 1 | 0 | 2: 381  | 2: 392  |

|                                                       |                               |   |   |   |         |         |
|-------------------------------------------------------|-------------------------------|---|---|---|---------|---------|
| Kahramanmaraş-Pazarcık'ta Meydana Gelen Deprem Hk. 11 | Coordination\Disinformation   | 1 | 1 | 1 | 2: 452  | 2: 465  |
| Kahramanmaraş-Pazarcık'ta Meydana Gelen Deprem Hk. 11 | Coordination\Disinformation   | 1 | 1 | 1 | 2: 452  | 2: 465  |
| Kahramanmaraş-Pazarcık'ta Meydana Gelen Deprem Hk. 11 | Earthquake                    | 1 | 1 | 1 | 2: 571  | 2: 576  |
| Kahramanmaraş-Pazarcık'ta Meydana Gelen Deprem Hk. 11 | Earthquake                    | 1 | 1 | 1 | 2: 571  | 2: 576  |
| Kahramanmaraş-Pazarcık'ta Meydana Gelen Deprem Hk. 11 | AFAD                          | 1 | 1 | 1 | 2: 691  | 2: 694  |
| Kahramanmaraş-Pazarcık'ta Meydana Gelen Deprem Hk. 11 | AFAD                          | 1 | 1 | 1 | 2: 691  | 2: 694  |
| Kahramanmaraş-Pazarcık'ta Meydana Gelen Deprem Hk. 11 | Disaster                      | 1 | 1 | 1 | 2: 987  | 2: 990  |
| Kahramanmaraş-Pazarcık'ta Meydana Gelen Deprem Hk. 11 | Disaster                      | 1 | 1 | 1 | 2: 987  | 2: 990  |
| Kahramanmaraş-Pazarcık'ta Meydana Gelen Deprem Hk. 11 | Coordination\Public relations | 1 | 1 | 1 | 2: 1146 | 2: 1151 |
| Kahramanmaraş-Pazarcık'ta Meydana Gelen Deprem Hk. 11 | Coordination\Public relations | 1 | 1 | 1 | 2: 1146 | 2: 1151 |
| Kahramanmaraş-Pazarcık'ta Meydana Gelen Deprem Hk. 11 | AFAD                          | 1 | 1 | 1 | 2: 1186 | 2: 1189 |
| Kahramanmaraş-Pazarcık'ta Meydana Gelen Deprem Hk. 11 | AFAD                          | 1 | 1 | 1 | 2: 1186 | 2: 1189 |
| Kahramanmaraş-Pazarcık'ta Meydana Gelen Deprem Hk. 11 | AFAD                          | 1 | 1 | 1 | 2: 1244 | 2: 1247 |
| Kahramanmaraş-Pazarcık'ta Meydana Gelen Deprem Hk. 11 | AFAD                          | 1 | 1 | 1 | 2: 1244 | 2: 1247 |
| Kahramanmaraş-Pazarcık'ta Meydana Gelen Deprem Hk. 11 | AFAD                          | 1 | 1 | 1 | 2: 1361 | 2: 1364 |
| Kahramanmaraş-Pazarcık'ta Meydana Gelen Deprem Hk. 11 | AFAD                          | 1 | 1 | 1 | 2: 1361 | 2: 1364 |
| Kahramanmaraş-Pazarcık'ta Meydana Gelen Deprem Hk. 11 | Response\Search&Rescue        | 1 | 1 | 1 | 2: 1455 | 2: 1468 |
| Kahramanmaraş-Pazarcık'ta Meydana Gelen Deprem Hk. 11 | Response\Search&Rescue        | 1 | 1 | 1 | 2: 1455 | 2: 1468 |
| Kahramanmaraş-Pazarcık'ta Meydana Gelen Deprem Hk. 11 | Disaster                      | 1 | 1 | 1 | 2: 1519 | 2: 1522 |
| Kahramanmaraş-Pazarcık'ta Meydana Gelen Deprem Hk. 11 | Disaster                      | 1 | 1 | 1 | 2: 1519 | 2: 1522 |

|                                                              |                                 |   |   |   |         |         |
|--------------------------------------------------------------|---------------------------------|---|---|---|---------|---------|
| Kahramanmaraş-<br>Pazarcık'ta Meydana<br>Gelen Deprem Hk. 11 | AFAD                            | 1 | 1 | 1 | 2: 1537 | 2: 1540 |
| Kahramanmaraş-<br>Pazarcık'ta Meydana<br>Gelen Deprem Hk. 11 | AFAD                            | 1 | 1 | 1 | 2: 1537 | 2: 1540 |
| Kahramanmaraş-<br>Pazarcık'ta Meydana<br>Gelen Deprem Hk. 11 | Preparedness\Preparedness       | 1 | 1 | 1 | 2: 1601 | 2: 1611 |
| Kahramanmaraş-<br>Pazarcık'ta Meydana<br>Gelen Deprem Hk. 11 | Preparedness\Preparedness       | 1 | 1 | 1 | 2: 1601 | 2: 1611 |
| Kahramanmaraş-<br>Pazarcık'ta Meydana<br>Gelen Deprem Hk. 11 | Disaster                        | 1 | 1 | 1 | 2: 1601 | 2: 1604 |
| Kahramanmaraş-<br>Pazarcık'ta Meydana<br>Gelen Deprem Hk. 11 | Disaster                        | 1 | 1 | 1 | 2: 1601 | 2: 1604 |
| Kahramanmaraş-<br>Pazarcık'ta Meydana<br>Gelen Deprem Hk. 11 | Disaster                        | 1 | 1 | 1 | 2: 1649 | 2: 1652 |
| Kahramanmaraş-<br>Pazarcık'ta Meydana<br>Gelen Deprem Hk. 11 | Disaster                        | 1 | 1 | 1 | 2: 1649 | 2: 1652 |
| Kahramanmaraş-<br>Pazarcık'ta Meydana<br>Gelen Deprem Hk. 11 | Recovery\Fund drive             | 1 | 1 | 1 | 2: 1710 | 2: 1728 |
| Kahramanmaraş-<br>Pazarcık'ta Meydana<br>Gelen Deprem Hk. 11 | Recovery\Fund drive             | 1 | 1 | 1 | 2: 1710 | 2: 1728 |
| Kahramanmaraş-<br>Pazarcık'ta Meydana<br>Gelen Deprem Hk. 11 | Coordination\Social media       | 1 | 0 | 0 | 2: 1826 | 2: 1837 |
| Kahramanmaraş-<br>Pazarcık'ta Meydana<br>Gelen Deprem Hk. 11 | Coordination\Social media usage | 0 | 1 | 0 | 2: 1826 | 2: 1837 |
| Kahramanmaraş-<br>Pazarcık'ta Meydana<br>Gelen Deprem Hk. 11 | AFAD                            | 1 | 1 | 1 | 2: 1882 | 2: 1885 |
| Kahramanmaraş-<br>Pazarcık'ta Meydana<br>Gelen Deprem Hk. 11 | AFAD                            | 1 | 1 | 1 | 2: 1882 | 2: 1885 |
| Kahramanmaraş-<br>Pazarcık'ta Meydana<br>Gelen Deprem Hk. 11 | AFAD                            | 1 | 1 | 1 | 2: 1904 | 2: 1907 |
| Kahramanmaraş-<br>Pazarcık'ta Meydana<br>Gelen Deprem Hk. 11 | AFAD                            | 1 | 1 | 1 | 2: 1904 | 2: 1907 |
| Kahramanmaraş-<br>Pazarcık'ta Meydana<br>Gelen Deprem Hk. 11 | Coordination\Information        | 1 | 1 | 1 | 2: 1949 | 2: 1960 |
| Kahramanmaraş-<br>Pazarcık'ta Meydana<br>Gelen Deprem Hk. 11 | Coordination\Information        | 1 | 1 | 1 | 2: 1949 | 2: 1960 |
| Kahramanmaraş-<br>Pazarcık'ta Meydana<br>Gelen Deprem Hk. 11 | Recovery\Peacemaking            | 1 | 1 | 1 | 2: 1965 | 2: 1974 |
| Kahramanmaraş-<br>Pazarcık'ta Meydana<br>Gelen Deprem Hk. 11 | Recovery\Peacemaking            | 1 | 1 | 1 | 2: 1965 | 2: 1974 |

|                                                              |                                 |   |   |   |        |        |
|--------------------------------------------------------------|---------------------------------|---|---|---|--------|--------|
| Kahramanmaraş-<br>Pazarcık'ta Meydana<br>Gelen Deprem Hk. 11 | Kahramanmaraş                   | 1 | 0 | 0 | 3: 17  | 3: 29  |
| Kahramanmaraş-<br>Pazarcık'ta Meydana<br>Gelen Deprem Hk. 11 | Pazarcık                        | 0 | 1 | 0 | 3: 17  | 3: 29  |
| Kahramanmaraş-<br>Pazarcık'ta Meydana<br>Gelen Deprem Hk. 11 | Earthquake                      | 1 | 1 | 1 | 3: 57  | 3: 62  |
| Kahramanmaraş-<br>Pazarcık'ta Meydana<br>Gelen Deprem Hk. 11 | Earthquake                      | 1 | 1 | 1 | 3: 57  | 3: 62  |
| Kahramanmaraş-<br>Pazarcık'ta Meydana<br>Gelen Deprem Hk. 11 | AFAD                            | 1 | 1 | 1 | 3: 98  | 3: 101 |
| Kahramanmaraş-<br>Pazarcık'ta Meydana<br>Gelen Deprem Hk. 11 | AFAD                            | 1 | 1 | 1 | 3: 98  | 3: 101 |
| Kahramanmaraş-<br>Pazarcık'ta Meydana<br>Gelen Deprem Hk. 11 | Earthquake                      | 1 | 1 | 1 | 3: 149 | 3: 154 |
| Kahramanmaraş-<br>Pazarcık'ta Meydana<br>Gelen Deprem Hk. 11 | Earthquake                      | 1 | 1 | 1 | 3: 149 | 3: 154 |
| Kahramanmaraş-<br>Pazarcık'ta Meydana<br>Gelen Deprem Hk. 11 | Coordination\Social media       | 1 | 0 | 0 | 3: 180 | 3: 191 |
| Kahramanmaraş-<br>Pazarcık'ta Meydana<br>Gelen Deprem Hk. 11 | Coordination\Social media usage | 0 | 1 | 0 | 3: 180 | 3: 191 |
| Kahramanmaraş-<br>Pazarcık'ta Meydana<br>Gelen Deprem Hk. 11 | Disaster                        | 1 | 1 | 1 | 3: 282 | 3: 285 |
| Kahramanmaraş-<br>Pazarcık'ta Meydana<br>Gelen Deprem Hk. 11 | Disaster                        | 1 | 1 | 1 | 3: 282 | 3: 285 |
| Kahramanmaraş-<br>Pazarcık'ta Meydana<br>Gelen Deprem Hk. 11 | Emergency                       | 1 | 1 | 1 | 3: 290 | 3: 299 |
| Kahramanmaraş-<br>Pazarcık'ta Meydana<br>Gelen Deprem Hk. 11 | Emergency                       | 1 | 1 | 1 | 3: 290 | 3: 299 |
| Kahramanmaraş-<br>Pazarcık'ta Meydana<br>Gelen Deprem Hk. 12 | Kahramanmaraş                   | 1 | 0 | 0 | 1: 17  | 1: 29  |
| Kahramanmaraş-<br>Pazarcık'ta Meydana<br>Gelen Deprem Hk. 12 | Pazarcık                        | 0 | 1 | 0 | 1: 17  | 1: 29  |
| Kahramanmaraş-<br>Pazarcık'ta Meydana<br>Gelen Deprem Hk. 12 | Earthquake                      | 1 | 1 | 1 | 1: 57  | 1: 62  |
| Kahramanmaraş-<br>Pazarcık'ta Meydana<br>Gelen Deprem Hk. 12 | Earthquake                      | 1 | 1 | 1 | 1: 57  | 1: 62  |
| Kahramanmaraş-<br>Pazarcık'ta Meydana<br>Gelen Deprem Hk. 12 | AFAD                            | 1 | 1 | 1 | 1: 98  | 1: 101 |
| Kahramanmaraş-<br>Pazarcık'ta Meydana<br>Gelen Deprem Hk. 12 | AFAD                            | 1 | 1 | 1 | 1: 98  | 1: 101 |



|                                                              |               |   |   |   |        |        |
|--------------------------------------------------------------|---------------|---|---|---|--------|--------|
| Kahramanmaraş-<br>Pazarcık'ta Meydana<br>Gelen Deprem Hk. 12 | Earthquake    | 1 | 1 | 1 | 1: 149 | 1: 154 |
| Kahramanmaraş-<br>Pazarcık'ta Meydana<br>Gelen Deprem Hk. 12 | Earthquake    | 1 | 1 | 1 | 1: 149 | 1: 154 |
| Kahramanmaraş-<br>Pazarcık'ta Meydana<br>Gelen Deprem Hk. 12 | Kahramanmaraş | 1 | 0 | 0 | 1: 180 | 1: 192 |
| Kahramanmaraş-<br>Pazarcık'ta Meydana<br>Gelen Deprem Hk. 12 | Pazarcık      | 0 | 1 | 0 | 1: 180 | 1: 192 |
| Kahramanmaraş-<br>Pazarcık'ta Meydana<br>Gelen Deprem Hk. 12 | Earthquake    | 1 | 1 | 1 | 1: 220 | 1: 225 |
| Kahramanmaraş-<br>Pazarcık'ta Meydana<br>Gelen Deprem Hk. 12 | Earthquake    | 1 | 1 | 1 | 1: 220 | 1: 225 |
| Kahramanmaraş-<br>Pazarcık'ta Meydana<br>Gelen Deprem Hk. 12 | Kahramanmaraş | 1 | 0 | 0 | 1: 299 | 1: 311 |
| Kahramanmaraş-<br>Pazarcık'ta Meydana<br>Gelen Deprem Hk. 12 | Pazarcık      | 0 | 1 | 0 | 1: 299 | 1: 311 |
| Kahramanmaraş-<br>Pazarcık'ta Meydana<br>Gelen Deprem Hk. 12 | Earthquake    | 1 | 1 | 1 | 1: 339 | 1: 344 |
| Kahramanmaraş-<br>Pazarcık'ta Meydana<br>Gelen Deprem Hk. 12 | Earthquake    | 1 | 1 | 1 | 1: 339 | 1: 344 |
| Kahramanmaraş-<br>Pazarcık'ta Meydana<br>Gelen Deprem Hk. 12 | Kahramanmaraş | 1 | 0 | 0 | 1: 408 | 1: 420 |
| Kahramanmaraş-<br>Pazarcık'ta Meydana<br>Gelen Deprem Hk. 12 | Pazarcık      | 0 | 1 | 0 | 1: 408 | 1: 420 |
| Kahramanmaraş-<br>Pazarcık'ta Meydana<br>Gelen Deprem Hk. 12 | Earthquake    | 1 | 1 | 1 | 1: 466 | 1: 471 |
| Kahramanmaraş-<br>Pazarcık'ta Meydana<br>Gelen Deprem Hk. 12 | Earthquake    | 1 | 1 | 1 | 1: 466 | 1: 471 |
| Kahramanmaraş-<br>Pazarcık'ta Meydana<br>Gelen Deprem Hk. 12 | Earthquake    | 1 | 1 | 1 | 1: 496 | 1: 501 |
| Kahramanmaraş-<br>Pazarcık'ta Meydana<br>Gelen Deprem Hk. 12 | Earthquake    | 1 | 1 | 1 | 1: 496 | 1: 501 |
| Kahramanmaraş-<br>Pazarcık'ta Meydana<br>Gelen Deprem Hk. 12 | Earthquake    | 1 | 1 | 1 | 1: 586 | 1: 591 |
| Kahramanmaraş-<br>Pazarcık'ta Meydana<br>Gelen Deprem Hk. 12 | Earthquake    | 1 | 1 | 1 | 1: 586 | 1: 591 |
| Kahramanmaraş-<br>Pazarcık'ta Meydana<br>Gelen Deprem Hk. 12 | Kahramanmaraş | 1 | 0 | 0 | 1: 659 | 1: 671 |
| Kahramanmaraş-<br>Pazarcık'ta Meydana<br>Gelen Deprem Hk. 12 | Pazarcık      | 0 | 1 | 0 | 1: 659 | 1: 671 |

|                                                              |                           |   |   |   |         |         |
|--------------------------------------------------------------|---------------------------|---|---|---|---------|---------|
| Kahramanmaraş-<br>Pazarcık'ta Meydana<br>Gelen Deprem Hk. 12 | AFAD                      | 1 | 1 | 1 | 1: 869  | 1: 872  |
| Kahramanmaraş-<br>Pazarcık'ta Meydana<br>Gelen Deprem Hk. 12 | AFAD                      | 1 | 1 | 1 | 1: 869  | 1: 872  |
| Kahramanmaraş-<br>Pazarcık'ta Meydana<br>Gelen Deprem Hk. 12 | Response\Military         | 1 | 1 | 1 | 1: 880  | 1: 887  |
| Kahramanmaraş-<br>Pazarcık'ta Meydana<br>Gelen Deprem Hk. 12 | Response\Military         | 1 | 1 | 1 | 1: 880  | 1: 887  |
| Kahramanmaraş-<br>Pazarcık'ta Meydana<br>Gelen Deprem Hk. 12 | Response\Search&Rescue    | 1 | 1 | 1 | 1: 1065 | 1: 1078 |
| Kahramanmaraş-<br>Pazarcık'ta Meydana<br>Gelen Deprem Hk. 12 | Response\Search&Rescue    | 1 | 1 | 1 | 1: 1065 | 1: 1078 |
| Kahramanmaraş-<br>Pazarcık'ta Meydana<br>Gelen Deprem Hk. 12 | Disaster                  | 1 | 1 | 1 | 1: 1260 | 1: 1263 |
| Kahramanmaraş-<br>Pazarcık'ta Meydana<br>Gelen Deprem Hk. 12 | Disaster                  | 1 | 1 | 1 | 1: 1260 | 1: 1263 |
| Kahramanmaraş-<br>Pazarcık'ta Meydana<br>Gelen Deprem Hk. 12 | Disaster                  | 1 | 1 | 1 | 1: 1293 | 1: 1296 |
| Kahramanmaraş-<br>Pazarcık'ta Meydana<br>Gelen Deprem Hk. 12 | Disaster                  | 1 | 1 | 1 | 1: 1293 | 1: 1296 |
| Kahramanmaraş-<br>Pazarcık'ta Meydana<br>Gelen Deprem Hk. 12 | Disaster                  | 1 | 1 | 1 | 1: 1457 | 1: 1460 |
| Kahramanmaraş-<br>Pazarcık'ta Meydana<br>Gelen Deprem Hk. 12 | Disaster                  | 1 | 1 | 1 | 1: 1457 | 1: 1460 |
| Kahramanmaraş-<br>Pazarcık'ta Meydana<br>Gelen Deprem Hk. 12 | Response\Coast guard&Navy | 1 | 1 | 1 | 1: 1565 | 1: 1578 |
| Kahramanmaraş-<br>Pazarcık'ta Meydana<br>Gelen Deprem Hk. 12 | Response\Coast guard&Navy | 1 | 1 | 1 | 1: 1565 | 1: 1578 |
| Kahramanmaraş-<br>Pazarcık'ta Meydana<br>Gelen Deprem Hk. 12 | Response\Military         | 1 | 1 | 1 | 1: 1583 | 1: 1590 |
| Kahramanmaraş-<br>Pazarcık'ta Meydana<br>Gelen Deprem Hk. 12 | Response\Military         | 1 | 1 | 1 | 1: 1583 | 1: 1590 |
| Kahramanmaraş-<br>Pazarcık'ta Meydana<br>Gelen Deprem Hk. 12 | Shelter&meal\Evacuation   | 1 | 1 | 1 | 1: 1787 | 1: 1793 |
| Kahramanmaraş-<br>Pazarcık'ta Meydana<br>Gelen Deprem Hk. 12 | Shelter&meal\Evacuation   | 1 | 1 | 1 | 1: 1787 | 1: 1793 |
| Kahramanmaraş-<br>Pazarcık'ta Meydana<br>Gelen Deprem Hk. 12 | Response\Coast guard&Navy | 1 | 1 | 1 | 1: 1804 | 1: 1819 |
| Kahramanmaraş-<br>Pazarcık'ta Meydana<br>Gelen Deprem Hk. 12 | Response\Coast guard&Navy | 1 | 1 | 1 | 1: 1804 | 1: 1819 |

|                                                       |                           |   |   |   |         |         |
|-------------------------------------------------------|---------------------------|---|---|---|---------|---------|
| Kahramanmaraş-Pazarcık'ta Meydana Gelen Deprem Hk. 12 | Response\Coast guard&Navy | 1 | 1 | 1 | 1: 1847 | 1: 1860 |
| Kahramanmaraş-Pazarcık'ta Meydana Gelen Deprem Hk. 12 | Response\Coast guard&Navy | 1 | 1 | 1 | 1: 1847 | 1: 1860 |
| Kahramanmaraş-Pazarcık'ta Meydana Gelen Deprem Hk. 12 | Shelter&meal\Evacuation   | 1 | 1 | 1 | 1: 1943 | 1: 1949 |
| Kahramanmaraş-Pazarcık'ta Meydana Gelen Deprem Hk. 12 | Shelter&meal\Evacuation   | 1 | 1 | 1 | 1: 1943 | 1: 1949 |
| Kahramanmaraş-Pazarcık'ta Meydana Gelen Deprem Hk. 12 | Disaster                  | 1 | 1 | 1 | 1: 2093 | 1: 2096 |
| Kahramanmaraş-Pazarcık'ta Meydana Gelen Deprem Hk. 12 | Disaster                  | 1 | 1 | 1 | 1: 2093 | 1: 2096 |
| Kahramanmaraş-Pazarcık'ta Meydana Gelen Deprem Hk. 12 | AFAD                      | 1 | 1 | 1 | 1: 2108 | 1: 2111 |
| Kahramanmaraş-Pazarcık'ta Meydana Gelen Deprem Hk. 12 | AFAD                      | 1 | 1 | 1 | 1: 2108 | 1: 2111 |
| Kahramanmaraş-Pazarcık'ta Meydana Gelen Deprem Hk. 12 | Response\Welfare service  | 1 | 1 | 1 | 1: 2147 | 1: 2159 |
| Kahramanmaraş-Pazarcık'ta Meydana Gelen Deprem Hk. 12 | Response\Welfare service  | 1 | 1 | 1 | 1: 2147 | 1: 2159 |
| Kahramanmaraş-Pazarcık'ta Meydana Gelen Deprem Hk. 12 | Emergency                 | 1 | 1 | 1 | 1: 2235 | 1: 2244 |
| Kahramanmaraş-Pazarcık'ta Meydana Gelen Deprem Hk. 12 | Emergency                 | 1 | 1 | 1 | 1: 2235 | 1: 2244 |
| Kahramanmaraş-Pazarcık'ta Meydana Gelen Deprem Hk. 12 | Disaster                  | 1 | 1 | 1 | 1: 2271 | 1: 2274 |
| Kahramanmaraş-Pazarcık'ta Meydana Gelen Deprem Hk. 12 | Disaster                  | 1 | 1 | 1 | 1: 2271 | 1: 2274 |
| Kahramanmaraş-Pazarcık'ta Meydana Gelen Deprem Hk. 12 | Shelter&meal\Sheltering   | 1 | 1 | 1 | 1: 2276 | 1: 2282 |
| Kahramanmaraş-Pazarcık'ta Meydana Gelen Deprem Hk. 12 | Shelter&meal\Sheltering   | 1 | 1 | 1 | 1: 2276 | 1: 2282 |
| Kahramanmaraş-Pazarcık'ta Meydana Gelen Deprem Hk. 12 | AFAD                      | 1 | 1 | 1 | 1: 2329 | 1: 2332 |
| Kahramanmaraş-Pazarcık'ta Meydana Gelen Deprem Hk. 12 | AFAD                      | 1 | 1 | 1 | 1: 2329 | 1: 2332 |
| Kahramanmaraş-Pazarcık'ta Meydana Gelen Deprem Hk. 12 | Shelter&meal\Tent         | 1 | 1 | 1 | 1: 2345 | 1: 2349 |
| Kahramanmaraş-Pazarcık'ta Meydana Gelen Deprem Hk. 12 | Shelter&meal\Tent         | 1 | 1 | 1 | 1: 2345 | 1: 2349 |

|                                                              |                              |   |   |   |         |         |
|--------------------------------------------------------------|------------------------------|---|---|---|---------|---------|
| Kahramanmaraş-<br>Pazarcık'ta Meydana<br>Gelen Deprem Hk. 12 | Shelter&meal\\Container      | 1 | 1 | 1 | 1: 2471 | 1: 2479 |
| Kahramanmaraş-<br>Pazarcık'ta Meydana<br>Gelen Deprem Hk. 12 | Shelter&meal\\Container      | 1 | 1 | 1 | 1: 2471 | 1: 2479 |
| Kahramanmaraş-<br>Pazarcık'ta Meydana<br>Gelen Deprem Hk. 12 | Shelter&meal\\Tent           | 1 | 1 | 1 | 1: 2500 | 1: 2504 |
| Kahramanmaraş-<br>Pazarcık'ta Meydana<br>Gelen Deprem Hk. 12 | Shelter&meal\\Tent           | 1 | 1 | 1 | 1: 2500 | 1: 2504 |
| Kahramanmaraş-<br>Pazarcık'ta Meydana<br>Gelen Deprem Hk. 12 | Disaster                     | 1 | 1 | 1 | 1: 2523 | 1: 2526 |
| Kahramanmaraş-<br>Pazarcık'ta Meydana<br>Gelen Deprem Hk. 12 | Disaster                     | 1 | 1 | 1 | 1: 2523 | 1: 2526 |
| Kahramanmaraş-<br>Pazarcık'ta Meydana<br>Gelen Deprem Hk. 12 | Shelter&meal\\Mobile kitchen | 1 | 1 | 1 | 1: 2575 | 1: 2586 |
| Kahramanmaraş-<br>Pazarcık'ta Meydana<br>Gelen Deprem Hk. 12 | Shelter&meal\\Mobile kitchen | 1 | 1 | 1 | 1: 2575 | 1: 2586 |
| Kahramanmaraş-<br>Pazarcık'ta Meydana<br>Gelen Deprem Hk. 12 | Shelter&meal\\Mobile bakery  | 1 | 1 | 1 | 1: 2622 | 1: 2632 |
| Kahramanmaraş-<br>Pazarcık'ta Meydana<br>Gelen Deprem Hk. 12 | Shelter&meal\\Mobile bakery  | 1 | 1 | 1 | 1: 2622 | 1: 2632 |
| Kahramanmaraş-<br>Pazarcık'ta Meydana<br>Gelen Deprem Hk. 12 | Response\\Military           | 1 | 1 | 1 | 1: 2672 | 1: 2679 |
| Kahramanmaraş-<br>Pazarcık'ta Meydana<br>Gelen Deprem Hk. 12 | Response\\Military           | 1 | 1 | 1 | 1: 2672 | 1: 2679 |
| Kahramanmaraş-<br>Pazarcık'ta Meydana<br>Gelen Deprem Hk. 12 | Shelter&meal\\Mobile bakery  | 1 | 1 | 1 | 1: 2704 | 1: 2714 |
| Kahramanmaraş-<br>Pazarcık'ta Meydana<br>Gelen Deprem Hk. 12 | Shelter&meal\\Mobile bakery  | 1 | 1 | 1 | 1: 2704 | 1: 2714 |
| Kahramanmaraş-<br>Pazarcık'ta Meydana<br>Gelen Deprem Hk. 12 | Shelter&meal\\Mobile kitchen | 1 | 1 | 1 | 1: 2772 | 1: 2783 |
| Kahramanmaraş-<br>Pazarcık'ta Meydana<br>Gelen Deprem Hk. 12 | Shelter&meal\\Mobile kitchen | 1 | 1 | 1 | 1: 2772 | 1: 2783 |
| Kahramanmaraş-<br>Pazarcık'ta Meydana<br>Gelen Deprem Hk. 12 | Disaster                     | 1 | 1 | 1 | 1: 2807 | 1: 2810 |
| Kahramanmaraş-<br>Pazarcık'ta Meydana<br>Gelen Deprem Hk. 12 | Disaster                     | 1 | 1 | 1 | 1: 2807 | 1: 2810 |
| Kahramanmaraş-<br>Pazarcık'ta Meydana<br>Gelen Deprem Hk. 12 | Disaster                     | 1 | 1 | 1 | 1: 2955 | 1: 2958 |
| Kahramanmaraş-<br>Pazarcık'ta Meydana<br>Gelen Deprem Hk. 12 | Disaster                     | 1 | 1 | 1 | 1: 2955 | 1: 2958 |

|                                                       |                               |   |   |   |         |         |
|-------------------------------------------------------|-------------------------------|---|---|---|---------|---------|
| Kahramanmaraş-Pazarcık'ta Meydana Gelen Deprem Hk. 12 | Response\Psychosocial support | 1 | 1 | 1 | 1: 2960 | 1: 2969 |
| Kahramanmaraş-Pazarcık'ta Meydana Gelen Deprem Hk. 12 | Response\Psychosocial support | 1 | 1 | 1 | 1: 2960 | 1: 2969 |
| Kahramanmaraş-Pazarcık'ta Meydana Gelen Deprem Hk. 12 | Response\Welfare service      | 1 | 1 | 1 | 1: 2993 | 1: 3005 |
| Kahramanmaraş-Pazarcık'ta Meydana Gelen Deprem Hk. 12 | Response\Welfare service      | 1 | 1 | 1 | 1: 2993 | 1: 3005 |
| Kahramanmaraş-Pazarcık'ta Meydana Gelen Deprem Hk. 12 | Kahramanmaraş                 | 1 | 0 | 0 | 1: 3016 | 1: 3028 |
| Kahramanmaraş-Pazarcık'ta Meydana Gelen Deprem Hk. 12 | Pazarcık                      | 0 | 1 | 0 | 1: 3016 | 1: 3028 |
| Kahramanmaraş-Pazarcık'ta Meydana Gelen Deprem Hk. 12 | Disaster                      | 1 | 1 | 1 | 1: 3142 | 1: 3145 |
| Kahramanmaraş-Pazarcık'ta Meydana Gelen Deprem Hk. 12 | Disaster                      | 1 | 1 | 1 | 1: 3142 | 1: 3145 |
| Kahramanmaraş-Pazarcık'ta Meydana Gelen Deprem Hk. 12 | Kahramanmaraş                 | 1 | 0 | 0 | 2: 17   | 2: 29   |
| Kahramanmaraş-Pazarcık'ta Meydana Gelen Deprem Hk. 12 | Pazarcık                      | 0 | 1 | 0 | 2: 17   | 2: 29   |
| Kahramanmaraş-Pazarcık'ta Meydana Gelen Deprem Hk. 12 | Earthquake                    | 1 | 1 | 1 | 2: 57   | 2: 62   |
| Kahramanmaraş-Pazarcık'ta Meydana Gelen Deprem Hk. 12 | Earthquake                    | 1 | 1 | 1 | 2: 57   | 2: 62   |
| Kahramanmaraş-Pazarcık'ta Meydana Gelen Deprem Hk. 12 | AFAD                          | 1 | 1 | 1 | 2: 98   | 2: 101  |
| Kahramanmaraş-Pazarcık'ta Meydana Gelen Deprem Hk. 12 | AFAD                          | 1 | 1 | 1 | 2: 98   | 2: 101  |
| Kahramanmaraş-Pazarcık'ta Meydana Gelen Deprem Hk. 12 | Earthquake                    | 1 | 1 | 1 | 2: 149  | 2: 154  |
| Kahramanmaraş-Pazarcık'ta Meydana Gelen Deprem Hk. 12 | Earthquake                    | 1 | 1 | 1 | 2: 149  | 2: 154  |
| Kahramanmaraş-Pazarcık'ta Meydana Gelen Deprem Hk. 12 | Disaster                      | 1 | 1 | 1 | 2: 180  | 2: 183  |
| Kahramanmaraş-Pazarcık'ta Meydana Gelen Deprem Hk. 12 | Disaster                      | 1 | 1 | 1 | 2: 180  | 2: 183  |
| Kahramanmaraş-Pazarcık'ta Meydana Gelen Deprem Hk. 12 | Coordination\Coordination     | 1 | 1 | 1 | 2: 239  | 2: 250  |
| Kahramanmaraş-Pazarcık'ta Meydana Gelen Deprem Hk. 12 | Coordination\Coordination     | 1 | 1 | 1 | 2: 239  | 2: 250  |

|                                                       |                                 |   |   |   |         |         |
|-------------------------------------------------------|---------------------------------|---|---|---|---------|---------|
| Kahramanmaraş-Pazarcık'ta Meydana Gelen Deprem Hk. 12 | Coordination\Social media       | 1 | 0 | 0 | 2: 381  | 2: 392  |
| Kahramanmaraş-Pazarcık'ta Meydana Gelen Deprem Hk. 12 | Coordination\Social media usage | 0 | 1 | 0 | 2: 381  | 2: 392  |
| Kahramanmaraş-Pazarcık'ta Meydana Gelen Deprem Hk. 12 | Coordination\Disinformation     | 1 | 1 | 1 | 2: 452  | 2: 465  |
| Kahramanmaraş-Pazarcık'ta Meydana Gelen Deprem Hk. 12 | Coordination\Disinformation     | 1 | 1 | 1 | 2: 452  | 2: 465  |
| Kahramanmaraş-Pazarcık'ta Meydana Gelen Deprem Hk. 12 | Earthquake                      | 1 | 1 | 1 | 2: 571  | 2: 576  |
| Kahramanmaraş-Pazarcık'ta Meydana Gelen Deprem Hk. 12 | Earthquake                      | 1 | 1 | 1 | 2: 571  | 2: 576  |
| Kahramanmaraş-Pazarcık'ta Meydana Gelen Deprem Hk. 12 | AFAD                            | 1 | 1 | 1 | 2: 691  | 2: 694  |
| Kahramanmaraş-Pazarcık'ta Meydana Gelen Deprem Hk. 12 | AFAD                            | 1 | 1 | 1 | 2: 691  | 2: 694  |
| Kahramanmaraş-Pazarcık'ta Meydana Gelen Deprem Hk. 12 | Disaster                        | 1 | 1 | 1 | 2: 987  | 2: 990  |
| Kahramanmaraş-Pazarcık'ta Meydana Gelen Deprem Hk. 12 | Disaster                        | 1 | 1 | 1 | 2: 987  | 2: 990  |
| Kahramanmaraş-Pazarcık'ta Meydana Gelen Deprem Hk. 12 | Coordination\Public relations   | 1 | 1 | 1 | 2: 1146 | 2: 1151 |
| Kahramanmaraş-Pazarcık'ta Meydana Gelen Deprem Hk. 12 | Coordination\Public relations   | 1 | 1 | 1 | 2: 1146 | 2: 1151 |
| Kahramanmaraş-Pazarcık'ta Meydana Gelen Deprem Hk. 12 | AFAD                            | 1 | 1 | 1 | 2: 1186 | 2: 1189 |
| Kahramanmaraş-Pazarcık'ta Meydana Gelen Deprem Hk. 12 | AFAD                            | 1 | 1 | 1 | 2: 1186 | 2: 1189 |
| Kahramanmaraş-Pazarcık'ta Meydana Gelen Deprem Hk. 12 | AFAD                            | 1 | 1 | 1 | 2: 1244 | 2: 1247 |
| Kahramanmaraş-Pazarcık'ta Meydana Gelen Deprem Hk. 12 | AFAD                            | 1 | 1 | 1 | 2: 1244 | 2: 1247 |
| Kahramanmaraş-Pazarcık'ta Meydana Gelen Deprem Hk. 12 | AFAD                            | 1 | 1 | 1 | 2: 1361 | 2: 1364 |
| Kahramanmaraş-Pazarcık'ta Meydana Gelen Deprem Hk. 12 | AFAD                            | 1 | 1 | 1 | 2: 1361 | 2: 1364 |
| Kahramanmaraş-Pazarcık'ta Meydana Gelen Deprem Hk. 12 | Response\Search&Rescue          | 1 | 1 | 1 | 2: 1455 | 2: 1468 |
| Kahramanmaraş-Pazarcık'ta Meydana Gelen Deprem Hk. 12 | Response\Search&Rescue          | 1 | 1 | 1 | 2: 1455 | 2: 1468 |

|                                                              |                                 |   |   |   |         |         |
|--------------------------------------------------------------|---------------------------------|---|---|---|---------|---------|
| Kahramanmaraş-<br>Pazarcık'ta Meydana<br>Gelen Deprem Hk. 12 | Disaster                        | 1 | 1 | 1 | 2: 1519 | 2: 1522 |
| Kahramanmaraş-<br>Pazarcık'ta Meydana<br>Gelen Deprem Hk. 12 | Disaster                        | 1 | 1 | 1 | 2: 1519 | 2: 1522 |
| Kahramanmaraş-<br>Pazarcık'ta Meydana<br>Gelen Deprem Hk. 12 | AFAD                            | 1 | 1 | 1 | 2: 1537 | 2: 1540 |
| Kahramanmaraş-<br>Pazarcık'ta Meydana<br>Gelen Deprem Hk. 12 | AFAD                            | 1 | 1 | 1 | 2: 1537 | 2: 1540 |
| Kahramanmaraş-<br>Pazarcık'ta Meydana<br>Gelen Deprem Hk. 12 | Preparedness\Preparedness       | 1 | 1 | 1 | 2: 1601 | 2: 1611 |
| Kahramanmaraş-<br>Pazarcık'ta Meydana<br>Gelen Deprem Hk. 12 | Preparedness\Preparedness       | 1 | 1 | 1 | 2: 1601 | 2: 1611 |
| Kahramanmaraş-<br>Pazarcık'ta Meydana<br>Gelen Deprem Hk. 12 | Disaster                        | 1 | 1 | 1 | 2: 1601 | 2: 1604 |
| Kahramanmaraş-<br>Pazarcık'ta Meydana<br>Gelen Deprem Hk. 12 | Disaster                        | 1 | 1 | 1 | 2: 1601 | 2: 1604 |
| Kahramanmaraş-<br>Pazarcık'ta Meydana<br>Gelen Deprem Hk. 12 | Disaster                        | 1 | 1 | 1 | 2: 1649 | 2: 1652 |
| Kahramanmaraş-<br>Pazarcık'ta Meydana<br>Gelen Deprem Hk. 12 | Disaster                        | 1 | 1 | 1 | 2: 1649 | 2: 1652 |
| Kahramanmaraş-<br>Pazarcık'ta Meydana<br>Gelen Deprem Hk. 12 | Recovery\Fund drive             | 1 | 1 | 1 | 2: 1710 | 2: 1728 |
| Kahramanmaraş-<br>Pazarcık'ta Meydana<br>Gelen Deprem Hk. 12 | Recovery\Fund drive             | 1 | 1 | 1 | 2: 1710 | 2: 1728 |
| Kahramanmaraş-<br>Pazarcık'ta Meydana<br>Gelen Deprem Hk. 12 | Coordination\Social media       | 1 | 0 | 0 | 2: 1826 | 2: 1837 |
| Kahramanmaraş-<br>Pazarcık'ta Meydana<br>Gelen Deprem Hk. 12 | Coordination\Social media usage | 0 | 1 | 0 | 2: 1826 | 2: 1837 |
| Kahramanmaraş-<br>Pazarcık'ta Meydana<br>Gelen Deprem Hk. 12 | AFAD                            | 1 | 1 | 1 | 2: 1882 | 2: 1885 |
| Kahramanmaraş-<br>Pazarcık'ta Meydana<br>Gelen Deprem Hk. 12 | AFAD                            | 1 | 1 | 1 | 2: 1882 | 2: 1885 |
| Kahramanmaraş-<br>Pazarcık'ta Meydana<br>Gelen Deprem Hk. 12 | AFAD                            | 1 | 1 | 1 | 2: 1904 | 2: 1907 |
| Kahramanmaraş-<br>Pazarcık'ta Meydana<br>Gelen Deprem Hk. 12 | AFAD                            | 1 | 1 | 1 | 2: 1904 | 2: 1907 |
| Kahramanmaraş-<br>Pazarcık'ta Meydana<br>Gelen Deprem Hk. 12 | Coordination\Information        | 1 | 1 | 1 | 2: 1949 | 2: 1960 |
| Kahramanmaraş-<br>Pazarcık'ta Meydana<br>Gelen Deprem Hk. 12 | Coordination\Information        | 1 | 1 | 1 | 2: 1949 | 2: 1960 |

|                                                       |                                 |   |   |   |         |         |
|-------------------------------------------------------|---------------------------------|---|---|---|---------|---------|
| Kahramanmaraş-Pazarcık'ta Meydana Gelen Deprem Hk. 12 | Recovery\Peacemaking            | 1 | 1 | 1 | 2: 1965 | 2: 1974 |
| Kahramanmaraş-Pazarcık'ta Meydana Gelen Deprem Hk. 12 | Recovery\Peacemaking            | 1 | 1 | 1 | 2: 1965 | 2: 1974 |
| Kahramanmaraş-Pazarcık'ta Meydana Gelen Deprem Hk. 12 | Kahramanmaraş                   | 1 | 0 | 0 | 3: 17   | 3: 29   |
| Kahramanmaraş-Pazarcık'ta Meydana Gelen Deprem Hk. 12 | Pazarcık                        | 0 | 1 | 0 | 3: 17   | 3: 29   |
| Kahramanmaraş-Pazarcık'ta Meydana Gelen Deprem Hk. 12 | Earthquake                      | 1 | 1 | 1 | 3: 57   | 3: 62   |
| Kahramanmaraş-Pazarcık'ta Meydana Gelen Deprem Hk. 12 | Earthquake                      | 1 | 1 | 1 | 3: 57   | 3: 62   |
| Kahramanmaraş-Pazarcık'ta Meydana Gelen Deprem Hk. 12 | AFAD                            | 1 | 1 | 1 | 3: 98   | 3: 101  |
| Kahramanmaraş-Pazarcık'ta Meydana Gelen Deprem Hk. 12 | AFAD                            | 1 | 1 | 1 | 3: 98   | 3: 101  |
| Kahramanmaraş-Pazarcık'ta Meydana Gelen Deprem Hk. 12 | Earthquake                      | 1 | 1 | 1 | 3: 149  | 3: 154  |
| Kahramanmaraş-Pazarcık'ta Meydana Gelen Deprem Hk. 12 | Earthquake                      | 1 | 1 | 1 | 3: 149  | 3: 154  |
| Kahramanmaraş-Pazarcık'ta Meydana Gelen Deprem Hk. 12 | Coordination\Social media       | 1 | 0 | 0 | 3: 180  | 3: 191  |
| Kahramanmaraş-Pazarcık'ta Meydana Gelen Deprem Hk. 12 | Coordination\Social media usage | 0 | 1 | 0 | 3: 180  | 3: 191  |
| Kahramanmaraş-Pazarcık'ta Meydana Gelen Deprem Hk. 12 | Disaster                        | 1 | 1 | 1 | 3: 282  | 3: 285  |
| Kahramanmaraş-Pazarcık'ta Meydana Gelen Deprem Hk. 12 | Disaster                        | 1 | 1 | 1 | 3: 282  | 3: 285  |
| Kahramanmaraş-Pazarcık'ta Meydana Gelen Deprem Hk. 12 | Emergency                       | 1 | 1 | 1 | 3: 290  | 3: 299  |
| Kahramanmaraş-Pazarcık'ta Meydana Gelen Deprem Hk. 12 | Emergency                       | 1 | 1 | 1 | 3: 290  | 3: 299  |
| Kahramanmaraş-Pazarcık'ta Meydana Gelen Deprem Hk. 13 | Kahramanmaraş                   | 1 | 0 | 0 | 1: 17   | 1: 29   |
| Kahramanmaraş-Pazarcık'ta Meydana Gelen Deprem Hk. 13 | Pazarcık                        | 0 | 1 | 0 | 1: 17   | 1: 29   |
| Kahramanmaraş-Pazarcık'ta Meydana Gelen Deprem Hk. 13 | Earthquake                      | 1 | 1 | 1 | 1: 57   | 1: 62   |
| Kahramanmaraş-Pazarcık'ta Meydana Gelen Deprem Hk. 13 | Earthquake                      | 1 | 1 | 1 | 1: 57   | 1: 62   |



|                                                              |               |   |   |   |        |        |
|--------------------------------------------------------------|---------------|---|---|---|--------|--------|
| Kahramanmaraş-<br>Pazarcık'ta Meydana<br>Gelen Deprem Hk. 13 | AFAD          | 1 | 1 | 1 | 1: 98  | 1: 101 |
| Kahramanmaraş-<br>Pazarcık'ta Meydana<br>Gelen Deprem Hk. 13 | AFAD          | 1 | 1 | 1 | 1: 98  | 1: 101 |
| Kahramanmaraş-<br>Pazarcık'ta Meydana<br>Gelen Deprem Hk. 13 | Earthquake    | 1 | 1 | 1 | 1: 149 | 1: 154 |
| Kahramanmaraş-<br>Pazarcık'ta Meydana<br>Gelen Deprem Hk. 13 | Earthquake    | 1 | 1 | 1 | 1: 149 | 1: 154 |
| Kahramanmaraş-<br>Pazarcık'ta Meydana<br>Gelen Deprem Hk. 13 | Kahramanmaraş | 1 | 0 | 0 | 1: 180 | 1: 192 |
| Kahramanmaraş-<br>Pazarcık'ta Meydana<br>Gelen Deprem Hk. 13 | Pazarcık      | 0 | 1 | 0 | 1: 180 | 1: 192 |
| Kahramanmaraş-<br>Pazarcık'ta Meydana<br>Gelen Deprem Hk. 13 | Earthquake    | 1 | 1 | 1 | 1: 220 | 1: 225 |
| Kahramanmaraş-<br>Pazarcık'ta Meydana<br>Gelen Deprem Hk. 13 | Earthquake    | 1 | 1 | 1 | 1: 220 | 1: 225 |
| Kahramanmaraş-<br>Pazarcık'ta Meydana<br>Gelen Deprem Hk. 13 | Kahramanmaraş | 1 | 0 | 0 | 1: 299 | 1: 311 |
| Kahramanmaraş-<br>Pazarcık'ta Meydana<br>Gelen Deprem Hk. 13 | Pazarcık      | 0 | 1 | 0 | 1: 299 | 1: 311 |
| Kahramanmaraş-<br>Pazarcık'ta Meydana<br>Gelen Deprem Hk. 13 | Earthquake    | 1 | 1 | 1 | 1: 339 | 1: 344 |
| Kahramanmaraş-<br>Pazarcık'ta Meydana<br>Gelen Deprem Hk. 13 | Earthquake    | 1 | 1 | 1 | 1: 339 | 1: 344 |
| Kahramanmaraş-<br>Pazarcık'ta Meydana<br>Gelen Deprem Hk. 13 | Kahramanmaraş | 1 | 0 | 0 | 1: 408 | 1: 420 |
| Kahramanmaraş-<br>Pazarcık'ta Meydana<br>Gelen Deprem Hk. 13 | Pazarcık      | 0 | 1 | 0 | 1: 408 | 1: 420 |
| Kahramanmaraş-<br>Pazarcık'ta Meydana<br>Gelen Deprem Hk. 13 | Earthquake    | 1 | 1 | 1 | 1: 466 | 1: 471 |
| Kahramanmaraş-<br>Pazarcık'ta Meydana<br>Gelen Deprem Hk. 13 | Earthquake    | 1 | 1 | 1 | 1: 466 | 1: 471 |
| Kahramanmaraş-<br>Pazarcık'ta Meydana<br>Gelen Deprem Hk. 13 | Earthquake    | 1 | 1 | 1 | 1: 496 | 1: 501 |
| Kahramanmaraş-<br>Pazarcık'ta Meydana<br>Gelen Deprem Hk. 13 | Earthquake    | 1 | 1 | 1 | 1: 496 | 1: 501 |
| Kahramanmaraş-<br>Pazarcık'ta Meydana<br>Gelen Deprem Hk. 13 | Earthquake    | 1 | 1 | 1 | 1: 586 | 1: 591 |
| Kahramanmaraş-<br>Pazarcık'ta Meydana<br>Gelen Deprem Hk. 13 | Earthquake    | 1 | 1 | 1 | 1: 586 | 1: 591 |

|                                                       |                         |   |   |   |         |         |
|-------------------------------------------------------|-------------------------|---|---|---|---------|---------|
| Kahramanmaraş-Pazarcık'ta Meydana Gelen Deprem Hk. 13 | Kahramanmaraş           | 1 | 0 | 0 | 1: 659  | 1: 671  |
| Kahramanmaraş-Pazarcık'ta Meydana Gelen Deprem Hk. 13 | Pazarcık                | 0 | 1 | 0 | 1: 659  | 1: 671  |
| Kahramanmaraş-Pazarcık'ta Meydana Gelen Deprem Hk. 13 | Earthquake              | 1 | 1 | 1 | 1: 860  | 1: 865  |
| Kahramanmaraş-Pazarcık'ta Meydana Gelen Deprem Hk. 13 | Earthquake              | 1 | 1 | 1 | 1: 860  | 1: 865  |
| Kahramanmaraş-Pazarcık'ta Meydana Gelen Deprem Hk. 13 | Shelter&meal\Sheltering | 1 | 1 | 1 | 1: 889  | 1: 895  |
| Kahramanmaraş-Pazarcık'ta Meydana Gelen Deprem Hk. 13 | Shelter&meal\Sheltering | 1 | 1 | 1 | 1: 889  | 1: 895  |
| Kahramanmaraş-Pazarcık'ta Meydana Gelen Deprem Hk. 13 | AFAD                    | 1 | 1 | 1 | 1: 920  | 1: 923  |
| Kahramanmaraş-Pazarcık'ta Meydana Gelen Deprem Hk. 13 | AFAD                    | 1 | 1 | 1 | 1: 920  | 1: 923  |
| Kahramanmaraş-Pazarcık'ta Meydana Gelen Deprem Hk. 13 | Shelter&meal\Tent       | 1 | 1 | 1 | 1: 936  | 1: 940  |
| Kahramanmaraş-Pazarcık'ta Meydana Gelen Deprem Hk. 13 | Shelter&meal\Tent       | 1 | 1 | 1 | 1: 936  | 1: 940  |
| Kahramanmaraş-Pazarcık'ta Meydana Gelen Deprem Hk. 13 | AFAD                    | 1 | 1 | 1 | 1: 976  | 1: 979  |
| Kahramanmaraş-Pazarcık'ta Meydana Gelen Deprem Hk. 13 | AFAD                    | 1 | 1 | 1 | 1: 976  | 1: 979  |
| Kahramanmaraş-Pazarcık'ta Meydana Gelen Deprem Hk. 13 | Response\Military       | 1 | 1 | 1 | 1: 987  | 1: 994  |
| Kahramanmaraş-Pazarcık'ta Meydana Gelen Deprem Hk. 13 | Response\Military       | 1 | 1 | 1 | 1: 987  | 1: 994  |
| Kahramanmaraş-Pazarcık'ta Meydana Gelen Deprem Hk. 13 | Response\Search&Rescue  | 1 | 1 | 1 | 1: 1172 | 1: 1185 |
| Kahramanmaraş-Pazarcık'ta Meydana Gelen Deprem Hk. 13 | Response\Search&Rescue  | 1 | 1 | 1 | 1: 1172 | 1: 1185 |
| Kahramanmaraş-Pazarcık'ta Meydana Gelen Deprem Hk. 13 | Disaster                | 1 | 1 | 1 | 1: 1367 | 1: 1370 |
| Kahramanmaraş-Pazarcık'ta Meydana Gelen Deprem Hk. 13 | Disaster                | 1 | 1 | 1 | 1: 1367 | 1: 1370 |
| Kahramanmaraş-Pazarcık'ta Meydana Gelen Deprem Hk. 13 | Disaster                | 1 | 1 | 1 | 1: 1400 | 1: 1403 |
| Kahramanmaraş-Pazarcık'ta Meydana Gelen Deprem Hk. 13 | Disaster                | 1 | 1 | 1 | 1: 1400 | 1: 1403 |

|                                                       |                           |   |   |   |         |         |
|-------------------------------------------------------|---------------------------|---|---|---|---------|---------|
| Kahramanmaraş-Pazarcık'ta Meydana Gelen Deprem Hk. 13 | Disaster                  | 1 | 1 | 1 | 1: 1564 | 1: 1567 |
| Kahramanmaraş-Pazarcık'ta Meydana Gelen Deprem Hk. 13 | Disaster                  | 1 | 1 | 1 | 1: 1564 | 1: 1567 |
| Kahramanmaraş-Pazarcık'ta Meydana Gelen Deprem Hk. 13 | Response\Coast guard&Navy | 1 | 1 | 1 | 1: 1687 | 1: 1700 |
| Kahramanmaraş-Pazarcık'ta Meydana Gelen Deprem Hk. 13 | Response\Coast guard&Navy | 1 | 1 | 1 | 1: 1687 | 1: 1700 |
| Kahramanmaraş-Pazarcık'ta Meydana Gelen Deprem Hk. 13 | Response\Military         | 1 | 1 | 1 | 1: 1705 | 1: 1712 |
| Kahramanmaraş-Pazarcık'ta Meydana Gelen Deprem Hk. 13 | Response\Military         | 1 | 1 | 1 | 1: 1705 | 1: 1712 |
| Kahramanmaraş-Pazarcık'ta Meydana Gelen Deprem Hk. 13 | Shelter&meal\Evacuation   | 1 | 1 | 1 | 1: 1909 | 1: 1915 |
| Kahramanmaraş-Pazarcık'ta Meydana Gelen Deprem Hk. 13 | Shelter&meal\Evacuation   | 1 | 1 | 1 | 1: 1909 | 1: 1915 |
| Kahramanmaraş-Pazarcık'ta Meydana Gelen Deprem Hk. 13 | Response\Coast guard&Navy | 1 | 1 | 1 | 1: 1926 | 1: 1941 |
| Kahramanmaraş-Pazarcık'ta Meydana Gelen Deprem Hk. 13 | Response\Coast guard&Navy | 1 | 1 | 1 | 1: 1926 | 1: 1941 |
| Kahramanmaraş-Pazarcık'ta Meydana Gelen Deprem Hk. 13 | Response\Coast guard&Navy | 1 | 1 | 1 | 1: 1969 | 1: 1982 |
| Kahramanmaraş-Pazarcık'ta Meydana Gelen Deprem Hk. 13 | Response\Coast guard&Navy | 1 | 1 | 1 | 1: 1969 | 1: 1982 |
| Kahramanmaraş-Pazarcık'ta Meydana Gelen Deprem Hk. 13 | Disaster                  | 1 | 1 | 1 | 1: 2059 | 1: 2062 |
| Kahramanmaraş-Pazarcık'ta Meydana Gelen Deprem Hk. 13 | Disaster                  | 1 | 1 | 1 | 1: 2059 | 1: 2062 |
| Kahramanmaraş-Pazarcık'ta Meydana Gelen Deprem Hk. 13 | AFAD                      | 1 | 1 | 1 | 1: 2074 | 1: 2077 |
| Kahramanmaraş-Pazarcık'ta Meydana Gelen Deprem Hk. 13 | AFAD                      | 1 | 1 | 1 | 1: 2074 | 1: 2077 |
| Kahramanmaraş-Pazarcık'ta Meydana Gelen Deprem Hk. 13 | Response\Welfare service  | 1 | 1 | 1 | 1: 2113 | 1: 2125 |
| Kahramanmaraş-Pazarcık'ta Meydana Gelen Deprem Hk. 13 | Response\Welfare service  | 1 | 1 | 1 | 1: 2113 | 1: 2125 |
| Kahramanmaraş-Pazarcık'ta Meydana Gelen Deprem Hk. 13 | Emergency                 | 1 | 1 | 1 | 1: 2201 | 1: 2210 |
| Kahramanmaraş-Pazarcık'ta Meydana Gelen Deprem Hk. 13 | Emergency                 | 1 | 1 | 1 | 1: 2201 | 1: 2210 |

|                                                              |                             |   |   |   |         |         |
|--------------------------------------------------------------|-----------------------------|---|---|---|---------|---------|
| Kahramanmaraş-<br>Pazarcık'ta Meydana<br>Gelen Deprem Hk. 13 | Disaster                    | 1 | 1 | 1 | 1: 2237 | 1: 2240 |
| Kahramanmaraş-<br>Pazarcık'ta Meydana<br>Gelen Deprem Hk. 13 | Disaster                    | 1 | 1 | 1 | 1: 2237 | 1: 2240 |
| Kahramanmaraş-<br>Pazarcık'ta Meydana<br>Gelen Deprem Hk. 13 | Shelter&meal\Sheltering     | 1 | 1 | 1 | 1: 2242 | 1: 2248 |
| Kahramanmaraş-<br>Pazarcık'ta Meydana<br>Gelen Deprem Hk. 13 | Shelter&meal\Sheltering     | 1 | 1 | 1 | 1: 2242 | 1: 2248 |
| Kahramanmaraş-<br>Pazarcık'ta Meydana<br>Gelen Deprem Hk. 13 | Earthquake                  | 1 | 1 | 1 | 1: 2257 | 1: 2262 |
| Kahramanmaraş-<br>Pazarcık'ta Meydana<br>Gelen Deprem Hk. 13 | Earthquake                  | 1 | 1 | 1 | 1: 2257 | 1: 2262 |
| Kahramanmaraş-<br>Pazarcık'ta Meydana<br>Gelen Deprem Hk. 13 | AFAD                        | 1 | 1 | 1 | 1: 2310 | 1: 2313 |
| Kahramanmaraş-<br>Pazarcık'ta Meydana<br>Gelen Deprem Hk. 13 | AFAD                        | 1 | 1 | 1 | 1: 2310 | 1: 2313 |
| Kahramanmaraş-<br>Pazarcık'ta Meydana<br>Gelen Deprem Hk. 13 | Shelter&meal\Tent           | 1 | 1 | 1 | 1: 2326 | 1: 2330 |
| Kahramanmaraş-<br>Pazarcık'ta Meydana<br>Gelen Deprem Hk. 13 | Shelter&meal\Tent           | 1 | 1 | 1 | 1: 2326 | 1: 2330 |
| Kahramanmaraş-<br>Pazarcık'ta Meydana<br>Gelen Deprem Hk. 13 | AFAD                        | 1 | 1 | 1 | 1: 2357 | 1: 2360 |
| Kahramanmaraş-<br>Pazarcık'ta Meydana<br>Gelen Deprem Hk. 13 | AFAD                        | 1 | 1 | 1 | 1: 2357 | 1: 2360 |
| Kahramanmaraş-<br>Pazarcık'ta Meydana<br>Gelen Deprem Hk. 13 | Shelter&meal\Tent           | 1 | 1 | 1 | 1: 2373 | 1: 2377 |
| Kahramanmaraş-<br>Pazarcık'ta Meydana<br>Gelen Deprem Hk. 13 | Shelter&meal\Tent           | 1 | 1 | 1 | 1: 2373 | 1: 2377 |
| Kahramanmaraş-<br>Pazarcık'ta Meydana<br>Gelen Deprem Hk. 13 | Disaster                    | 1 | 1 | 1 | 1: 2578 | 1: 2581 |
| Kahramanmaraş-<br>Pazarcık'ta Meydana<br>Gelen Deprem Hk. 13 | Disaster                    | 1 | 1 | 1 | 1: 2578 | 1: 2581 |
| Kahramanmaraş-<br>Pazarcık'ta Meydana<br>Gelen Deprem Hk. 13 | Shelter&meal\Mobile kitchen | 1 | 1 | 1 | 1: 2630 | 1: 2641 |
| Kahramanmaraş-<br>Pazarcık'ta Meydana<br>Gelen Deprem Hk. 13 | Shelter&meal\Mobile kitchen | 1 | 1 | 1 | 1: 2630 | 1: 2641 |
| Kahramanmaraş-<br>Pazarcık'ta Meydana<br>Gelen Deprem Hk. 13 | Shelter&meal\Mobile bakery  | 1 | 1 | 1 | 1: 2678 | 1: 2688 |
| Kahramanmaraş-<br>Pazarcık'ta Meydana<br>Gelen Deprem Hk. 13 | Shelter&meal\Mobile bakery  | 1 | 1 | 1 | 1: 2678 | 1: 2688 |

|                                                              |                                |   |   |   |         |         |
|--------------------------------------------------------------|--------------------------------|---|---|---|---------|---------|
| Kahramanmaraş-<br>Pazarcık'ta Meydana<br>Gelen Deprem Hk. 13 | Shelter&meal\\Container        | 1 | 1 | 1 | 1: 2693 | 1: 2701 |
| Kahramanmaraş-<br>Pazarcık'ta Meydana<br>Gelen Deprem Hk. 13 | Shelter&meal\\Container        | 1 | 1 | 1 | 1: 2693 | 1: 2701 |
| Kahramanmaraş-<br>Pazarcık'ta Meydana<br>Gelen Deprem Hk. 13 | Disaster                       | 1 | 1 | 1 | 1: 2749 | 1: 2752 |
| Kahramanmaraş-<br>Pazarcık'ta Meydana<br>Gelen Deprem Hk. 13 | Disaster                       | 1 | 1 | 1 | 1: 2749 | 1: 2752 |
| Kahramanmaraş-<br>Pazarcık'ta Meydana<br>Gelen Deprem Hk. 13 | Shelter&meal\\Hot meal         | 1 | 1 | 1 | 1: 2776 | 1: 2786 |
| Kahramanmaraş-<br>Pazarcık'ta Meydana<br>Gelen Deprem Hk. 13 | Shelter&meal\\Hot meal         | 1 | 1 | 1 | 1: 2776 | 1: 2786 |
| Kahramanmaraş-<br>Pazarcık'ta Meydana<br>Gelen Deprem Hk. 13 | Disaster                       | 1 | 1 | 1 | 1: 2955 | 1: 2958 |
| Kahramanmaraş-<br>Pazarcık'ta Meydana<br>Gelen Deprem Hk. 13 | Disaster                       | 1 | 1 | 1 | 1: 2955 | 1: 2958 |
| Kahramanmaraş-<br>Pazarcık'ta Meydana<br>Gelen Deprem Hk. 13 | Response\\Psychosocial support | 1 | 1 | 1 | 1: 2960 | 1: 2969 |
| Kahramanmaraş-<br>Pazarcık'ta Meydana<br>Gelen Deprem Hk. 13 | Response\\Psychosocial support | 1 | 1 | 1 | 1: 2960 | 1: 2969 |
| Kahramanmaraş-<br>Pazarcık'ta Meydana<br>Gelen Deprem Hk. 13 | Response\\Welfare service      | 1 | 1 | 1 | 1: 2993 | 1: 3005 |
| Kahramanmaraş-<br>Pazarcık'ta Meydana<br>Gelen Deprem Hk. 13 | Response\\Welfare service      | 1 | 1 | 1 | 1: 2993 | 1: 3005 |
| Kahramanmaraş-<br>Pazarcık'ta Meydana<br>Gelen Deprem Hk. 13 | Kahramanmaraş                  | 1 | 0 | 0 | 1: 3016 | 1: 3028 |
| Kahramanmaraş-<br>Pazarcık'ta Meydana<br>Gelen Deprem Hk. 13 | Pazarcık                       | 0 | 1 | 0 | 1: 3016 | 1: 3028 |
| Kahramanmaraş-<br>Pazarcık'ta Meydana<br>Gelen Deprem Hk. 13 | Kahramanmaraş                  | 1 | 0 | 0 | 2: 17   | 2: 29   |
| Kahramanmaraş-<br>Pazarcık'ta Meydana<br>Gelen Deprem Hk. 13 | Pazarcık                       | 0 | 1 | 0 | 2: 17   | 2: 29   |
| Kahramanmaraş-<br>Pazarcık'ta Meydana<br>Gelen Deprem Hk. 13 | Earthquake                     | 1 | 1 | 1 | 2: 57   | 2: 62   |
| Kahramanmaraş-<br>Pazarcık'ta Meydana<br>Gelen Deprem Hk. 13 | Earthquake                     | 1 | 1 | 1 | 2: 57   | 2: 62   |
| Kahramanmaraş-<br>Pazarcık'ta Meydana<br>Gelen Deprem Hk. 13 | AFAD                           | 1 | 1 | 1 | 2: 98   | 2: 101  |
| Kahramanmaraş-<br>Pazarcık'ta Meydana<br>Gelen Deprem Hk. 13 | AFAD                           | 1 | 1 | 1 | 2: 98   | 2: 101  |

|                                                       |                               |   |   |   |        |        |
|-------------------------------------------------------|-------------------------------|---|---|---|--------|--------|
| Kahramanmaraş-Pazarcık'ta Meydana Gelen Deprem Hk. 13 | Earthquake                    | 1 | 1 | 1 | 2: 149 | 2: 154 |
| Kahramanmaraş-Pazarcık'ta Meydana Gelen Deprem Hk. 13 | Earthquake                    | 1 | 1 | 1 | 2: 149 | 2: 154 |
| Kahramanmaraş-Pazarcık'ta Meydana Gelen Deprem Hk. 13 | Disaster                      | 1 | 1 | 1 | 2: 304 | 2: 307 |
| Kahramanmaraş-Pazarcık'ta Meydana Gelen Deprem Hk. 13 | Disaster                      | 1 | 1 | 1 | 2: 304 | 2: 307 |
| Kahramanmaraş-Pazarcık'ta Meydana Gelen Deprem Hk. 13 | Coordination\Public relations | 1 | 1 | 1 | 2: 463 | 2: 468 |
| Kahramanmaraş-Pazarcık'ta Meydana Gelen Deprem Hk. 13 | Coordination\Public relations | 1 | 1 | 1 | 2: 463 | 2: 468 |
| Kahramanmaraş-Pazarcık'ta Meydana Gelen Deprem Hk. 13 | AFAD                          | 1 | 1 | 1 | 2: 503 | 2: 506 |
| Kahramanmaraş-Pazarcık'ta Meydana Gelen Deprem Hk. 13 | AFAD                          | 1 | 1 | 1 | 2: 503 | 2: 506 |
| Kahramanmaraş-Pazarcık'ta Meydana Gelen Deprem Hk. 13 | AFAD                          | 1 | 1 | 1 | 2: 561 | 2: 564 |
| Kahramanmaraş-Pazarcık'ta Meydana Gelen Deprem Hk. 13 | AFAD                          | 1 | 1 | 1 | 2: 561 | 2: 564 |
| Kahramanmaraş-Pazarcık'ta Meydana Gelen Deprem Hk. 13 | AFAD                          | 1 | 1 | 1 | 2: 678 | 2: 681 |
| Kahramanmaraş-Pazarcık'ta Meydana Gelen Deprem Hk. 13 | AFAD                          | 1 | 1 | 1 | 2: 678 | 2: 681 |
| Kahramanmaraş-Pazarcık'ta Meydana Gelen Deprem Hk. 13 | Response\Search&Rescue        | 1 | 1 | 1 | 2: 772 | 2: 785 |
| Kahramanmaraş-Pazarcık'ta Meydana Gelen Deprem Hk. 13 | Response\Search&Rescue        | 1 | 1 | 1 | 2: 772 | 2: 785 |
| Kahramanmaraş-Pazarcık'ta Meydana Gelen Deprem Hk. 13 | Disaster                      | 1 | 1 | 1 | 2: 836 | 2: 839 |
| Kahramanmaraş-Pazarcık'ta Meydana Gelen Deprem Hk. 13 | Disaster                      | 1 | 1 | 1 | 2: 836 | 2: 839 |
| Kahramanmaraş-Pazarcık'ta Meydana Gelen Deprem Hk. 13 | AFAD                          | 1 | 1 | 1 | 2: 854 | 2: 857 |
| Kahramanmaraş-Pazarcık'ta Meydana Gelen Deprem Hk. 13 | AFAD                          | 1 | 1 | 1 | 2: 854 | 2: 857 |
| Kahramanmaraş-Pazarcık'ta Meydana Gelen Deprem Hk. 13 | Preparedness\Preparedness     | 1 | 1 | 1 | 2: 918 | 2: 928 |
| Kahramanmaraş-Pazarcık'ta Meydana Gelen Deprem Hk. 13 | Preparedness\Preparedness     | 1 | 1 | 1 | 2: 918 | 2: 928 |

|                                                              |                                 |   |   |   |         |         |
|--------------------------------------------------------------|---------------------------------|---|---|---|---------|---------|
| Kahramanmaraş-<br>Pazarcık'ta Meydana<br>Gelen Deprem Hk. 13 | Disaster                        | 1 | 1 | 1 | 2: 918  | 2: 921  |
| Kahramanmaraş-<br>Pazarcık'ta Meydana<br>Gelen Deprem Hk. 13 | Disaster                        | 1 | 1 | 1 | 2: 918  | 2: 921  |
| Kahramanmaraş-<br>Pazarcık'ta Meydana<br>Gelen Deprem Hk. 13 | Disaster                        | 1 | 1 | 1 | 2: 966  | 2: 969  |
| Kahramanmaraş-<br>Pazarcık'ta Meydana<br>Gelen Deprem Hk. 13 | Disaster                        | 1 | 1 | 1 | 2: 966  | 2: 969  |
| Kahramanmaraş-<br>Pazarcık'ta Meydana<br>Gelen Deprem Hk. 13 | Recovery\Fund drive             | 1 | 1 | 1 | 2: 1027 | 2: 1045 |
| Kahramanmaraş-<br>Pazarcık'ta Meydana<br>Gelen Deprem Hk. 13 | Recovery\Fund drive             | 1 | 1 | 1 | 2: 1027 | 2: 1045 |
| Kahramanmaraş-<br>Pazarcık'ta Meydana<br>Gelen Deprem Hk. 13 | Coordination\Social media       | 1 | 0 | 0 | 2: 1143 | 2: 1154 |
| Kahramanmaraş-<br>Pazarcık'ta Meydana<br>Gelen Deprem Hk. 13 | Coordination\Social media usage | 0 | 1 | 0 | 2: 1143 | 2: 1154 |
| Kahramanmaraş-<br>Pazarcık'ta Meydana<br>Gelen Deprem Hk. 13 | AFAD                            | 1 | 1 | 1 | 2: 1199 | 2: 1202 |
| Kahramanmaraş-<br>Pazarcık'ta Meydana<br>Gelen Deprem Hk. 13 | AFAD                            | 1 | 1 | 1 | 2: 1199 | 2: 1202 |
| Kahramanmaraş-<br>Pazarcık'ta Meydana<br>Gelen Deprem Hk. 13 | AFAD                            | 1 | 1 | 1 | 2: 1221 | 2: 1224 |
| Kahramanmaraş-<br>Pazarcık'ta Meydana<br>Gelen Deprem Hk. 13 | AFAD                            | 1 | 1 | 1 | 2: 1221 | 2: 1224 |
| Kahramanmaraş-<br>Pazarcık'ta Meydana<br>Gelen Deprem Hk. 13 | Coordination\Information        | 1 | 1 | 1 | 2: 1266 | 2: 1277 |
| Kahramanmaraş-<br>Pazarcık'ta Meydana<br>Gelen Deprem Hk. 13 | Coordination\Information        | 1 | 1 | 1 | 2: 1266 | 2: 1277 |
| Kahramanmaraş-<br>Pazarcık'ta Meydana<br>Gelen Deprem Hk. 13 | Recovery\Peacemaking            | 1 | 1 | 1 | 2: 1282 | 2: 1291 |
| Kahramanmaraş-<br>Pazarcık'ta Meydana<br>Gelen Deprem Hk. 13 | Recovery\Peacemaking            | 1 | 1 | 1 | 2: 1282 | 2: 1291 |
| Kahramanmaraş-<br>Pazarcık'ta Meydana<br>Gelen Deprem Hk. 13 | Coordination\Social media       | 1 | 0 | 0 | 2: 1338 | 2: 1349 |
| Kahramanmaraş-<br>Pazarcık'ta Meydana<br>Gelen Deprem Hk. 13 | Coordination\Social media usage | 0 | 1 | 0 | 2: 1338 | 2: 1349 |
| Kahramanmaraş-<br>Pazarcık'ta Meydana<br>Gelen Deprem Hk. 13 | Disaster                        | 1 | 1 | 1 | 2: 1440 | 2: 1443 |
| Kahramanmaraş-<br>Pazarcık'ta Meydana<br>Gelen Deprem Hk. 13 | Disaster                        | 1 | 1 | 1 | 2: 1440 | 2: 1443 |

|                                                              |               |   |   |   |         |         |
|--------------------------------------------------------------|---------------|---|---|---|---------|---------|
| Kahramanmaraş-<br>Pazarcık'ta Meydana<br>Gelen Deprem Hk. 13 | Emergency     | 1 | 1 | 1 | 2: 1448 | 2: 1457 |
| Kahramanmaraş-<br>Pazarcık'ta Meydana<br>Gelen Deprem Hk. 13 | Emergency     | 1 | 1 | 1 | 2: 1448 | 2: 1457 |
| Kahramanmaraş-<br>Pazarcık'ta Meydana<br>Gelen Deprem Hk. 14 | Kahramanmaraş | 1 | 0 | 0 | 1: 17   | 1: 29   |
| Kahramanmaraş-<br>Pazarcık'ta Meydana<br>Gelen Deprem Hk. 14 | Pazarcık      | 0 | 1 | 0 | 1: 17   | 1: 29   |
| Kahramanmaraş-<br>Pazarcık'ta Meydana<br>Gelen Deprem Hk. 14 | Earthquake    | 1 | 1 | 1 | 1: 57   | 1: 62   |
| Kahramanmaraş-<br>Pazarcık'ta Meydana<br>Gelen Deprem Hk. 14 | Earthquake    | 1 | 1 | 1 | 1: 57   | 1: 62   |
| Kahramanmaraş-<br>Pazarcık'ta Meydana<br>Gelen Deprem Hk. 14 | AFAD          | 1 | 1 | 1 | 1: 98   | 1: 101  |
| Kahramanmaraş-<br>Pazarcık'ta Meydana<br>Gelen Deprem Hk. 14 | AFAD          | 1 | 1 | 1 | 1: 98   | 1: 101  |
| Kahramanmaraş-<br>Pazarcık'ta Meydana<br>Gelen Deprem Hk. 14 | Earthquake    | 1 | 1 | 1 | 1: 149  | 1: 154  |
| Kahramanmaraş-<br>Pazarcık'ta Meydana<br>Gelen Deprem Hk. 14 | Earthquake    | 1 | 1 | 1 | 1: 149  | 1: 154  |
| Kahramanmaraş-<br>Pazarcık'ta Meydana<br>Gelen Deprem Hk. 14 | Kahramanmaraş | 1 | 0 | 0 | 1: 180  | 1: 192  |
| Kahramanmaraş-<br>Pazarcık'ta Meydana<br>Gelen Deprem Hk. 14 | Pazarcık      | 0 | 1 | 0 | 1: 180  | 1: 192  |
| Kahramanmaraş-<br>Pazarcık'ta Meydana<br>Gelen Deprem Hk. 14 | Earthquake    | 1 | 1 | 1 | 1: 220  | 1: 225  |
| Kahramanmaraş-<br>Pazarcık'ta Meydana<br>Gelen Deprem Hk. 14 | Earthquake    | 1 | 1 | 1 | 1: 220  | 1: 225  |
| Kahramanmaraş-<br>Pazarcık'ta Meydana<br>Gelen Deprem Hk. 14 | Kahramanmaraş | 1 | 0 | 0 | 1: 299  | 1: 311  |
| Kahramanmaraş-<br>Pazarcık'ta Meydana<br>Gelen Deprem Hk. 14 | Pazarcık      | 0 | 1 | 0 | 1: 299  | 1: 311  |
| Kahramanmaraş-<br>Pazarcık'ta Meydana<br>Gelen Deprem Hk. 14 | Earthquake    | 1 | 1 | 1 | 1: 339  | 1: 344  |
| Kahramanmaraş-<br>Pazarcık'ta Meydana<br>Gelen Deprem Hk. 14 | Earthquake    | 1 | 1 | 1 | 1: 339  | 1: 344  |
| Kahramanmaraş-<br>Pazarcık'ta Meydana<br>Gelen Deprem Hk. 14 | Kahramanmaraş | 1 | 0 | 0 | 1: 408  | 1: 420  |
| Kahramanmaraş-<br>Pazarcık'ta Meydana<br>Gelen Deprem Hk. 14 | Pazarcık      | 0 | 1 | 0 | 1: 408  | 1: 420  |



|                                                              |                         |   |   |   |         |         |
|--------------------------------------------------------------|-------------------------|---|---|---|---------|---------|
| Kahramanmaraş-<br>Pazarcık'ta Meydana<br>Gelen Deprem Hk. 14 | Earthquake              | 1 | 1 | 1 | 1: 466  | 1: 471  |
| Kahramanmaraş-<br>Pazarcık'ta Meydana<br>Gelen Deprem Hk. 14 | Earthquake              | 1 | 1 | 1 | 1: 466  | 1: 471  |
| Kahramanmaraş-<br>Pazarcık'ta Meydana<br>Gelen Deprem Hk. 14 | Earthquake              | 1 | 1 | 1 | 1: 496  | 1: 501  |
| Kahramanmaraş-<br>Pazarcık'ta Meydana<br>Gelen Deprem Hk. 14 | Earthquake              | 1 | 1 | 1 | 1: 496  | 1: 501  |
| Kahramanmaraş-<br>Pazarcık'ta Meydana<br>Gelen Deprem Hk. 14 | Earthquake              | 1 | 1 | 1 | 1: 586  | 1: 591  |
| Kahramanmaraş-<br>Pazarcık'ta Meydana<br>Gelen Deprem Hk. 14 | Earthquake              | 1 | 1 | 1 | 1: 586  | 1: 591  |
| Kahramanmaraş-<br>Pazarcık'ta Meydana<br>Gelen Deprem Hk. 14 | Kahramanmaraş           | 1 | 0 | 0 | 1: 659  | 1: 671  |
| Kahramanmaraş-<br>Pazarcık'ta Meydana<br>Gelen Deprem Hk. 14 | Pazarcık                | 0 | 1 | 0 | 1: 659  | 1: 671  |
| Kahramanmaraş-<br>Pazarcık'ta Meydana<br>Gelen Deprem Hk. 14 | Earthquake              | 1 | 1 | 1 | 1: 860  | 1: 865  |
| Kahramanmaraş-<br>Pazarcık'ta Meydana<br>Gelen Deprem Hk. 14 | Earthquake              | 1 | 1 | 1 | 1: 860  | 1: 865  |
| Kahramanmaraş-<br>Pazarcık'ta Meydana<br>Gelen Deprem Hk. 14 | Shelter&meal\Sheltering | 1 | 1 | 1 | 1: 889  | 1: 895  |
| Kahramanmaraş-<br>Pazarcık'ta Meydana<br>Gelen Deprem Hk. 14 | Shelter&meal\Sheltering | 1 | 1 | 1 | 1: 889  | 1: 895  |
| Kahramanmaraş-<br>Pazarcık'ta Meydana<br>Gelen Deprem Hk. 14 | AFAD                    | 1 | 1 | 1 | 1: 920  | 1: 923  |
| Kahramanmaraş-<br>Pazarcık'ta Meydana<br>Gelen Deprem Hk. 14 | AFAD                    | 1 | 1 | 1 | 1: 920  | 1: 923  |
| Kahramanmaraş-<br>Pazarcık'ta Meydana<br>Gelen Deprem Hk. 14 | Shelter&meal\Tent       | 1 | 1 | 1 | 1: 936  | 1: 940  |
| Kahramanmaraş-<br>Pazarcık'ta Meydana<br>Gelen Deprem Hk. 14 | Shelter&meal\Tent       | 1 | 1 | 1 | 1: 936  | 1: 940  |
| Kahramanmaraş-<br>Pazarcık'ta Meydana<br>Gelen Deprem Hk. 14 | AFAD                    | 1 | 1 | 1 | 1: 976  | 1: 979  |
| Kahramanmaraş-<br>Pazarcık'ta Meydana<br>Gelen Deprem Hk. 14 | AFAD                    | 1 | 1 | 1 | 1: 976  | 1: 979  |
| Kahramanmaraş-<br>Pazarcık'ta Meydana<br>Gelen Deprem Hk. 14 | Response\Military       | 1 | 1 | 1 | 1: 1037 | 1: 1044 |
| Kahramanmaraş-<br>Pazarcık'ta Meydana<br>Gelen Deprem Hk. 14 | Response\Military       | 1 | 1 | 1 | 1: 1037 | 1: 1044 |

|                                                       |                           |   |   |   |         |         |
|-------------------------------------------------------|---------------------------|---|---|---|---------|---------|
| Kahramanmaraş-Pazarcık'ta Meydana Gelen Deprem Hk. 14 | Response\Search&Rescue    | 1 | 1 | 1 | 1: 1182 | 1: 1195 |
| Kahramanmaraş-Pazarcık'ta Meydana Gelen Deprem Hk. 14 | Response\Search&Rescue    | 1 | 1 | 1 | 1: 1182 | 1: 1195 |
| Kahramanmaraş-Pazarcık'ta Meydana Gelen Deprem Hk. 14 | Response\Number of staff  | 1 | 0 | 0 | 1: 1236 | 1: 1250 |
| Kahramanmaraş-Pazarcık'ta Meydana Gelen Deprem Hk. 14 | Response\Number           | 0 | 1 | 0 | 1: 1236 | 1: 1250 |
| Kahramanmaraş-Pazarcık'ta Meydana Gelen Deprem Hk. 14 | Disaster                  | 1 | 1 | 1 | 1: 1370 | 1: 1373 |
| Kahramanmaraş-Pazarcık'ta Meydana Gelen Deprem Hk. 14 | Disaster                  | 1 | 1 | 1 | 1: 1370 | 1: 1373 |
| Kahramanmaraş-Pazarcık'ta Meydana Gelen Deprem Hk. 14 | Disaster                  | 1 | 1 | 1 | 1: 1403 | 1: 1406 |
| Kahramanmaraş-Pazarcık'ta Meydana Gelen Deprem Hk. 14 | Disaster                  | 1 | 1 | 1 | 1: 1403 | 1: 1406 |
| Kahramanmaraş-Pazarcık'ta Meydana Gelen Deprem Hk. 14 | Disaster                  | 1 | 1 | 1 | 1: 1567 | 1: 1570 |
| Kahramanmaraş-Pazarcık'ta Meydana Gelen Deprem Hk. 14 | Disaster                  | 1 | 1 | 1 | 1: 1567 | 1: 1570 |
| Kahramanmaraş-Pazarcık'ta Meydana Gelen Deprem Hk. 14 | Response\Coast guard&Navy | 1 | 1 | 1 | 1: 1690 | 1: 1703 |
| Kahramanmaraş-Pazarcık'ta Meydana Gelen Deprem Hk. 14 | Response\Coast guard&Navy | 1 | 1 | 1 | 1: 1690 | 1: 1703 |
| Kahramanmaraş-Pazarcık'ta Meydana Gelen Deprem Hk. 14 | Response\Military         | 1 | 1 | 1 | 1: 1708 | 1: 1715 |
| Kahramanmaraş-Pazarcık'ta Meydana Gelen Deprem Hk. 14 | Response\Military         | 1 | 1 | 1 | 1: 1708 | 1: 1715 |
| Kahramanmaraş-Pazarcık'ta Meydana Gelen Deprem Hk. 14 | Shelter&meal\Evacuation   | 1 | 1 | 1 | 1: 1912 | 1: 1918 |
| Kahramanmaraş-Pazarcık'ta Meydana Gelen Deprem Hk. 14 | Shelter&meal\Evacuation   | 1 | 1 | 1 | 1: 1912 | 1: 1918 |
| Kahramanmaraş-Pazarcık'ta Meydana Gelen Deprem Hk. 14 | Response\Coast guard&Navy | 1 | 1 | 1 | 1: 1929 | 1: 1944 |
| Kahramanmaraş-Pazarcık'ta Meydana Gelen Deprem Hk. 14 | Response\Coast guard&Navy | 1 | 1 | 1 | 1: 1929 | 1: 1944 |
| Kahramanmaraş-Pazarcık'ta Meydana Gelen Deprem Hk. 14 | Response\Coast guard&Navy | 1 | 1 | 1 | 1: 1972 | 1: 1985 |
| Kahramanmaraş-Pazarcık'ta Meydana Gelen Deprem Hk. 14 | Response\Coast guard&Navy | 1 | 1 | 1 | 1: 1972 | 1: 1985 |

|                                                              |                          |   |   |   |         |         |
|--------------------------------------------------------------|--------------------------|---|---|---|---------|---------|
| Kahramanmaraş-<br>Pazarcık'ta Meydana<br>Gelen Deprem Hk. 14 | Disaster                 | 1 | 1 | 1 | 1: 2062 | 1: 2065 |
| Kahramanmaraş-<br>Pazarcık'ta Meydana<br>Gelen Deprem Hk. 14 | Disaster                 | 1 | 1 | 1 | 1: 2062 | 1: 2065 |
| Kahramanmaraş-<br>Pazarcık'ta Meydana<br>Gelen Deprem Hk. 14 | AFAD                     | 1 | 1 | 1 | 1: 2077 | 1: 2080 |
| Kahramanmaraş-<br>Pazarcık'ta Meydana<br>Gelen Deprem Hk. 14 | AFAD                     | 1 | 1 | 1 | 1: 2077 | 1: 2080 |
| Kahramanmaraş-<br>Pazarcık'ta Meydana<br>Gelen Deprem Hk. 14 | Response\Welfare service | 1 | 1 | 1 | 1: 2117 | 1: 2129 |
| Kahramanmaraş-<br>Pazarcık'ta Meydana<br>Gelen Deprem Hk. 14 | Response\Welfare service | 1 | 1 | 1 | 1: 2117 | 1: 2129 |
| Kahramanmaraş-<br>Pazarcık'ta Meydana<br>Gelen Deprem Hk. 14 | Emergency                | 1 | 1 | 1 | 1: 2205 | 1: 2214 |
| Kahramanmaraş-<br>Pazarcık'ta Meydana<br>Gelen Deprem Hk. 14 | Emergency                | 1 | 1 | 1 | 1: 2205 | 1: 2214 |
| Kahramanmaraş-<br>Pazarcık'ta Meydana<br>Gelen Deprem Hk. 14 | Disaster                 | 1 | 1 | 1 | 1: 2241 | 1: 2244 |
| Kahramanmaraş-<br>Pazarcık'ta Meydana<br>Gelen Deprem Hk. 14 | Disaster                 | 1 | 1 | 1 | 1: 2241 | 1: 2244 |
| Kahramanmaraş-<br>Pazarcık'ta Meydana<br>Gelen Deprem Hk. 14 | Shelter&meal\Sheltering  | 1 | 1 | 1 | 1: 2246 | 1: 2252 |
| Kahramanmaraş-<br>Pazarcık'ta Meydana<br>Gelen Deprem Hk. 14 | Shelter&meal\Sheltering  | 1 | 1 | 1 | 1: 2246 | 1: 2252 |
| Kahramanmaraş-<br>Pazarcık'ta Meydana<br>Gelen Deprem Hk. 14 | Earthquake               | 1 | 1 | 1 | 1: 2261 | 1: 2266 |
| Kahramanmaraş-<br>Pazarcık'ta Meydana<br>Gelen Deprem Hk. 14 | Earthquake               | 1 | 1 | 1 | 1: 2261 | 1: 2266 |
| Kahramanmaraş-<br>Pazarcık'ta Meydana<br>Gelen Deprem Hk. 14 | AFAD                     | 1 | 1 | 1 | 1: 2314 | 1: 2317 |
| Kahramanmaraş-<br>Pazarcık'ta Meydana<br>Gelen Deprem Hk. 14 | AFAD                     | 1 | 1 | 1 | 1: 2314 | 1: 2317 |
| Kahramanmaraş-<br>Pazarcık'ta Meydana<br>Gelen Deprem Hk. 14 | Shelter&meal\Tent        | 1 | 1 | 1 | 1: 2330 | 1: 2334 |
| Kahramanmaraş-<br>Pazarcık'ta Meydana<br>Gelen Deprem Hk. 14 | Shelter&meal\Tent        | 1 | 1 | 1 | 1: 2330 | 1: 2334 |
| Kahramanmaraş-<br>Pazarcık'ta Meydana<br>Gelen Deprem Hk. 14 | AFAD                     | 1 | 1 | 1 | 1: 2361 | 1: 2364 |
| Kahramanmaraş-<br>Pazarcık'ta Meydana<br>Gelen Deprem Hk. 14 | AFAD                     | 1 | 1 | 1 | 1: 2361 | 1: 2364 |

|                                                              |                              |   |   |   |         |         |
|--------------------------------------------------------------|------------------------------|---|---|---|---------|---------|
| Kahramanmaraş-<br>Pazarcık'ta Meydana<br>Gelen Deprem Hk. 14 | Shelter&meal\\Tent           | 1 | 1 | 1 | 1: 2377 | 1: 2381 |
| Kahramanmaraş-<br>Pazarcık'ta Meydana<br>Gelen Deprem Hk. 14 | Shelter&meal\\Tent           | 1 | 1 | 1 | 1: 2377 | 1: 2381 |
| Kahramanmaraş-<br>Pazarcık'ta Meydana<br>Gelen Deprem Hk. 14 | Disaster                     | 1 | 1 | 1 | 1: 2488 | 1: 2491 |
| Kahramanmaraş-<br>Pazarcık'ta Meydana<br>Gelen Deprem Hk. 14 | Disaster                     | 1 | 1 | 1 | 1: 2488 | 1: 2491 |
| Kahramanmaraş-<br>Pazarcık'ta Meydana<br>Gelen Deprem Hk. 14 | Shelter&meal\\Mobile kitchen | 1 | 1 | 1 | 1: 2540 | 1: 2551 |
| Kahramanmaraş-<br>Pazarcık'ta Meydana<br>Gelen Deprem Hk. 14 | Shelter&meal\\Mobile kitchen | 1 | 1 | 1 | 1: 2540 | 1: 2551 |
| Kahramanmaraş-<br>Pazarcık'ta Meydana<br>Gelen Deprem Hk. 14 | Shelter&meal\\Mobile bakery  | 1 | 1 | 1 | 1: 2587 | 1: 2597 |
| Kahramanmaraş-<br>Pazarcık'ta Meydana<br>Gelen Deprem Hk. 14 | Shelter&meal\\Mobile bakery  | 1 | 1 | 1 | 1: 2587 | 1: 2597 |
| Kahramanmaraş-<br>Pazarcık'ta Meydana<br>Gelen Deprem Hk. 14 | Response\\Military           | 1 | 1 | 1 | 1: 2637 | 1: 2644 |
| Kahramanmaraş-<br>Pazarcık'ta Meydana<br>Gelen Deprem Hk. 14 | Response\\Military           | 1 | 1 | 1 | 1: 2637 | 1: 2644 |
| Kahramanmaraş-<br>Pazarcık'ta Meydana<br>Gelen Deprem Hk. 14 | Shelter&meal\\Mobile bakery  | 1 | 1 | 1 | 1: 2669 | 1: 2679 |
| Kahramanmaraş-<br>Pazarcık'ta Meydana<br>Gelen Deprem Hk. 14 | Shelter&meal\\Mobile bakery  | 1 | 1 | 1 | 1: 2669 | 1: 2679 |
| Kahramanmaraş-<br>Pazarcık'ta Meydana<br>Gelen Deprem Hk. 14 | Shelter&meal\\Mobile kitchen | 1 | 1 | 1 | 1: 2737 | 1: 2748 |
| Kahramanmaraş-<br>Pazarcık'ta Meydana<br>Gelen Deprem Hk. 14 | Shelter&meal\\Mobile kitchen | 1 | 1 | 1 | 1: 2737 | 1: 2748 |
| Kahramanmaraş-<br>Pazarcık'ta Meydana<br>Gelen Deprem Hk. 14 | Disaster                     | 1 | 1 | 1 | 1: 2772 | 1: 2775 |
| Kahramanmaraş-<br>Pazarcık'ta Meydana<br>Gelen Deprem Hk. 14 | Disaster                     | 1 | 1 | 1 | 1: 2772 | 1: 2775 |
| Kahramanmaraş-<br>Pazarcık'ta Meydana<br>Gelen Deprem Hk. 14 | Shelter&meal\\Hot meal       | 1 | 1 | 1 | 1: 2799 | 1: 2809 |
| Kahramanmaraş-<br>Pazarcık'ta Meydana<br>Gelen Deprem Hk. 14 | Shelter&meal\\Hot meal       | 1 | 1 | 1 | 1: 2799 | 1: 2809 |
| Kahramanmaraş-<br>Pazarcık'ta Meydana<br>Gelen Deprem Hk. 14 | Disaster                     | 1 | 1 | 1 | 1: 2978 | 1: 2981 |
| Kahramanmaraş-<br>Pazarcık'ta Meydana<br>Gelen Deprem Hk. 14 | Disaster                     | 1 | 1 | 1 | 1: 2978 | 1: 2981 |

|                                                       |                               |   |   |   |         |         |
|-------------------------------------------------------|-------------------------------|---|---|---|---------|---------|
| Kahramanmaraş-Pazarcık'ta Meydana Gelen Deprem Hk. 14 | Response\Psychosocial support | 1 | 1 | 1 | 1: 2983 | 1: 2992 |
| Kahramanmaraş-Pazarcık'ta Meydana Gelen Deprem Hk. 14 | Response\Psychosocial support | 1 | 1 | 1 | 1: 2983 | 1: 2992 |
| Kahramanmaraş-Pazarcık'ta Meydana Gelen Deprem Hk. 14 | Response\Welfare service      | 1 | 1 | 1 | 1: 3016 | 1: 3028 |
| Kahramanmaraş-Pazarcık'ta Meydana Gelen Deprem Hk. 14 | Response\Welfare service      | 1 | 1 | 1 | 1: 3016 | 1: 3028 |
| Kahramanmaraş-Pazarcık'ta Meydana Gelen Deprem Hk. 14 | Kahramanmaraş                 | 1 | 0 | 0 | 1: 3039 | 1: 3051 |
| Kahramanmaraş-Pazarcık'ta Meydana Gelen Deprem Hk. 14 | Pazarcık                      | 0 | 1 | 0 | 1: 3039 | 1: 3051 |
| Kahramanmaraş-Pazarcık'ta Meydana Gelen Deprem Hk. 14 | Kahramanmaraş                 | 1 | 0 | 0 | 2: 17   | 2: 29   |
| Kahramanmaraş-Pazarcık'ta Meydana Gelen Deprem Hk. 14 | Pazarcık                      | 0 | 1 | 0 | 2: 17   | 2: 29   |
| Kahramanmaraş-Pazarcık'ta Meydana Gelen Deprem Hk. 14 | Earthquake                    | 1 | 1 | 1 | 2: 57   | 2: 62   |
| Kahramanmaraş-Pazarcık'ta Meydana Gelen Deprem Hk. 14 | Earthquake                    | 1 | 1 | 1 | 2: 57   | 2: 62   |
| Kahramanmaraş-Pazarcık'ta Meydana Gelen Deprem Hk. 14 | AFAD                          | 1 | 1 | 1 | 2: 98   | 2: 101  |
| Kahramanmaraş-Pazarcık'ta Meydana Gelen Deprem Hk. 14 | AFAD                          | 1 | 1 | 1 | 2: 98   | 2: 101  |
| Kahramanmaraş-Pazarcık'ta Meydana Gelen Deprem Hk. 14 | Earthquake                    | 1 | 1 | 1 | 2: 149  | 2: 154  |
| Kahramanmaraş-Pazarcık'ta Meydana Gelen Deprem Hk. 14 | Earthquake                    | 1 | 1 | 1 | 2: 149  | 2: 154  |
| Kahramanmaraş-Pazarcık'ta Meydana Gelen Deprem Hk. 14 | Disaster                      | 1 | 1 | 1 | 2: 335  | 2: 338  |
| Kahramanmaraş-Pazarcık'ta Meydana Gelen Deprem Hk. 14 | Disaster                      | 1 | 1 | 1 | 2: 335  | 2: 338  |
| Kahramanmaraş-Pazarcık'ta Meydana Gelen Deprem Hk. 14 | Coordination\Public relations | 1 | 1 | 1 | 2: 494  | 2: 499  |
| Kahramanmaraş-Pazarcık'ta Meydana Gelen Deprem Hk. 14 | Coordination\Public relations | 1 | 1 | 1 | 2: 494  | 2: 499  |
| Kahramanmaraş-Pazarcık'ta Meydana Gelen Deprem Hk. 14 | AFAD                          | 1 | 1 | 1 | 2: 534  | 2: 537  |
| Kahramanmaraş-Pazarcık'ta Meydana Gelen Deprem Hk. 14 | AFAD                          | 1 | 1 | 1 | 2: 534  | 2: 537  |

|                                                              |                                 |   |   |   |         |         |
|--------------------------------------------------------------|---------------------------------|---|---|---|---------|---------|
| Kahramanmaraş-<br>Pazarcık'ta Meydana<br>Gelen Deprem Hk. 14 | AFAD                            | 1 | 1 | 1 | 2: 592  | 2: 595  |
| Kahramanmaraş-<br>Pazarcık'ta Meydana<br>Gelen Deprem Hk. 14 | AFAD                            | 1 | 1 | 1 | 2: 592  | 2: 595  |
| Kahramanmaraş-<br>Pazarcık'ta Meydana<br>Gelen Deprem Hk. 14 | AFAD                            | 1 | 1 | 1 | 2: 709  | 2: 712  |
| Kahramanmaraş-<br>Pazarcık'ta Meydana<br>Gelen Deprem Hk. 14 | AFAD                            | 1 | 1 | 1 | 2: 709  | 2: 712  |
| Kahramanmaraş-<br>Pazarcık'ta Meydana<br>Gelen Deprem Hk. 14 | Response\Search&Rescue          | 1 | 1 | 1 | 2: 803  | 2: 816  |
| Kahramanmaraş-<br>Pazarcık'ta Meydana<br>Gelen Deprem Hk. 14 | Response\Search&Rescue          | 1 | 1 | 1 | 2: 803  | 2: 816  |
| Kahramanmaraş-<br>Pazarcık'ta Meydana<br>Gelen Deprem Hk. 14 | Disaster                        | 1 | 1 | 1 | 2: 867  | 2: 870  |
| Kahramanmaraş-<br>Pazarcık'ta Meydana<br>Gelen Deprem Hk. 14 | Disaster                        | 1 | 1 | 1 | 2: 867  | 2: 870  |
| Kahramanmaraş-<br>Pazarcık'ta Meydana<br>Gelen Deprem Hk. 14 | AFAD                            | 1 | 1 | 1 | 2: 885  | 2: 888  |
| Kahramanmaraş-<br>Pazarcık'ta Meydana<br>Gelen Deprem Hk. 14 | AFAD                            | 1 | 1 | 1 | 2: 885  | 2: 888  |
| Kahramanmaraş-<br>Pazarcık'ta Meydana<br>Gelen Deprem Hk. 14 | Preparedness\Preparedness       | 1 | 1 | 1 | 2: 949  | 2: 959  |
| Kahramanmaraş-<br>Pazarcık'ta Meydana<br>Gelen Deprem Hk. 14 | Preparedness\Preparedness       | 1 | 1 | 1 | 2: 949  | 2: 959  |
| Kahramanmaraş-<br>Pazarcık'ta Meydana<br>Gelen Deprem Hk. 14 | Disaster                        | 1 | 1 | 1 | 2: 949  | 2: 952  |
| Kahramanmaraş-<br>Pazarcık'ta Meydana<br>Gelen Deprem Hk. 14 | Disaster                        | 1 | 1 | 1 | 2: 949  | 2: 952  |
| Kahramanmaraş-<br>Pazarcık'ta Meydana<br>Gelen Deprem Hk. 14 | Disaster                        | 1 | 1 | 1 | 2: 997  | 2: 1000 |
| Kahramanmaraş-<br>Pazarcık'ta Meydana<br>Gelen Deprem Hk. 14 | Disaster                        | 1 | 1 | 1 | 2: 997  | 2: 1000 |
| Kahramanmaraş-<br>Pazarcık'ta Meydana<br>Gelen Deprem Hk. 14 | Recovery\Fund drive             | 1 | 1 | 1 | 2: 1058 | 2: 1076 |
| Kahramanmaraş-<br>Pazarcık'ta Meydana<br>Gelen Deprem Hk. 14 | Recovery\Fund drive             | 1 | 1 | 1 | 2: 1058 | 2: 1076 |
| Kahramanmaraş-<br>Pazarcık'ta Meydana<br>Gelen Deprem Hk. 14 | Coordination\Social media       | 1 | 0 | 0 | 2: 1174 | 2: 1185 |
| Kahramanmaraş-<br>Pazarcık'ta Meydana<br>Gelen Deprem Hk. 14 | Coordination\Social media usage | 0 | 1 | 0 | 2: 1174 | 2: 1185 |

|                                                              |                                 |   |   |   |         |         |
|--------------------------------------------------------------|---------------------------------|---|---|---|---------|---------|
| Kahramanmaraş-<br>Pazarcık'ta Meydana<br>Gelen Deprem Hk. 14 | AFAD                            | 1 | 1 | 1 | 2: 1230 | 2: 1233 |
| Kahramanmaraş-<br>Pazarcık'ta Meydana<br>Gelen Deprem Hk. 14 | AFAD                            | 1 | 1 | 1 | 2: 1230 | 2: 1233 |
| Kahramanmaraş-<br>Pazarcık'ta Meydana<br>Gelen Deprem Hk. 14 | AFAD                            | 1 | 1 | 1 | 2: 1252 | 2: 1255 |
| Kahramanmaraş-<br>Pazarcık'ta Meydana<br>Gelen Deprem Hk. 14 | AFAD                            | 1 | 1 | 1 | 2: 1252 | 2: 1255 |
| Kahramanmaraş-<br>Pazarcık'ta Meydana<br>Gelen Deprem Hk. 14 | Coordination\Information        | 1 | 1 | 1 | 2: 1297 | 2: 1308 |
| Kahramanmaraş-<br>Pazarcık'ta Meydana<br>Gelen Deprem Hk. 14 | Coordination\Information        | 1 | 1 | 1 | 2: 1297 | 2: 1308 |
| Kahramanmaraş-<br>Pazarcık'ta Meydana<br>Gelen Deprem Hk. 14 | Recovery\Peacemaking            | 1 | 1 | 1 | 2: 1313 | 2: 1322 |
| Kahramanmaraş-<br>Pazarcık'ta Meydana<br>Gelen Deprem Hk. 14 | Recovery\Peacemaking            | 1 | 1 | 1 | 2: 1313 | 2: 1322 |
| Kahramanmaraş-<br>Pazarcık'ta Meydana<br>Gelen Deprem Hk. 14 | Coordination\Social media       | 1 | 0 | 0 | 2: 1369 | 2: 1380 |
| Kahramanmaraş-<br>Pazarcık'ta Meydana<br>Gelen Deprem Hk. 14 | Coordination\Social media usage | 0 | 1 | 0 | 2: 1369 | 2: 1380 |
| Kahramanmaraş-<br>Pazarcık'ta Meydana<br>Gelen Deprem Hk. 14 | Disaster                        | 1 | 1 | 1 | 2: 1471 | 2: 1474 |
| Kahramanmaraş-<br>Pazarcık'ta Meydana<br>Gelen Deprem Hk. 14 | Disaster                        | 1 | 1 | 1 | 2: 1471 | 2: 1474 |
| Kahramanmaraş-<br>Pazarcık'ta Meydana<br>Gelen Deprem Hk. 14 | Emergency                       | 1 | 1 | 1 | 2: 1479 | 2: 1488 |
| Kahramanmaraş-<br>Pazarcık'ta Meydana<br>Gelen Deprem Hk. 14 | Emergency                       | 1 | 1 | 1 | 2: 1479 | 2: 1488 |
| Kahramanmaraş-<br>Pazarcık'ta Meydana<br>Gelen Deprem Hk. 15 | Kahramanmaraş                   | 1 | 0 | 0 | 1: 17   | 1: 29   |
| Kahramanmaraş-<br>Pazarcık'ta Meydana<br>Gelen Deprem Hk. 15 | Pazarcık                        | 0 | 1 | 0 | 1: 17   | 1: 29   |
| Kahramanmaraş-<br>Pazarcık'ta Meydana<br>Gelen Deprem Hk. 15 | Earthquake                      | 1 | 1 | 1 | 1: 57   | 1: 62   |
| Kahramanmaraş-<br>Pazarcık'ta Meydana<br>Gelen Deprem Hk. 15 | Earthquake                      | 1 | 1 | 1 | 1: 57   | 1: 62   |
| Kahramanmaraş-<br>Pazarcık'ta Meydana<br>Gelen Deprem Hk. 15 | AFAD                            | 1 | 1 | 1 | 1: 98   | 1: 101  |
| Kahramanmaraş-<br>Pazarcık'ta Meydana<br>Gelen Deprem Hk. 15 | AFAD                            | 1 | 1 | 1 | 1: 98   | 1: 101  |

|                                                              |               |   |   |   |        |        |
|--------------------------------------------------------------|---------------|---|---|---|--------|--------|
| Kahramanmaraş-<br>Pazarcık'ta Meydana<br>Gelen Deprem Hk. 15 | Earthquake    | 1 | 1 | 1 | 1: 149 | 1: 154 |
| Kahramanmaraş-<br>Pazarcık'ta Meydana<br>Gelen Deprem Hk. 15 | Earthquake    | 1 | 1 | 1 | 1: 149 | 1: 154 |
| Kahramanmaraş-<br>Pazarcık'ta Meydana<br>Gelen Deprem Hk. 15 | Kahramanmaraş | 1 | 0 | 0 | 1: 180 | 1: 192 |
| Kahramanmaraş-<br>Pazarcık'ta Meydana<br>Gelen Deprem Hk. 15 | Pazarcık      | 0 | 1 | 0 | 1: 180 | 1: 192 |
| Kahramanmaraş-<br>Pazarcık'ta Meydana<br>Gelen Deprem Hk. 15 | Earthquake    | 1 | 1 | 1 | 1: 220 | 1: 225 |
| Kahramanmaraş-<br>Pazarcık'ta Meydana<br>Gelen Deprem Hk. 15 | Earthquake    | 1 | 1 | 1 | 1: 220 | 1: 225 |
| Kahramanmaraş-<br>Pazarcık'ta Meydana<br>Gelen Deprem Hk. 15 | Kahramanmaraş | 1 | 0 | 0 | 1: 299 | 1: 311 |
| Kahramanmaraş-<br>Pazarcık'ta Meydana<br>Gelen Deprem Hk. 15 | Pazarcık      | 0 | 1 | 0 | 1: 299 | 1: 311 |
| Kahramanmaraş-<br>Pazarcık'ta Meydana<br>Gelen Deprem Hk. 15 | Earthquake    | 1 | 1 | 1 | 1: 339 | 1: 344 |
| Kahramanmaraş-<br>Pazarcık'ta Meydana<br>Gelen Deprem Hk. 15 | Earthquake    | 1 | 1 | 1 | 1: 339 | 1: 344 |
| Kahramanmaraş-<br>Pazarcık'ta Meydana<br>Gelen Deprem Hk. 15 | Kahramanmaraş | 1 | 0 | 0 | 1: 408 | 1: 420 |
| Kahramanmaraş-<br>Pazarcık'ta Meydana<br>Gelen Deprem Hk. 15 | Pazarcık      | 0 | 1 | 0 | 1: 408 | 1: 420 |
| Kahramanmaraş-<br>Pazarcık'ta Meydana<br>Gelen Deprem Hk. 15 | Earthquake    | 1 | 1 | 1 | 1: 466 | 1: 471 |
| Kahramanmaraş-<br>Pazarcık'ta Meydana<br>Gelen Deprem Hk. 15 | Earthquake    | 1 | 1 | 1 | 1: 466 | 1: 471 |
| Kahramanmaraş-<br>Pazarcık'ta Meydana<br>Gelen Deprem Hk. 15 | Earthquake    | 1 | 1 | 1 | 1: 496 | 1: 501 |
| Kahramanmaraş-<br>Pazarcık'ta Meydana<br>Gelen Deprem Hk. 15 | Earthquake    | 1 | 1 | 1 | 1: 496 | 1: 501 |
| Kahramanmaraş-<br>Pazarcık'ta Meydana<br>Gelen Deprem Hk. 15 | Earthquake    | 1 | 1 | 1 | 1: 586 | 1: 591 |
| Kahramanmaraş-<br>Pazarcık'ta Meydana<br>Gelen Deprem Hk. 15 | Earthquake    | 1 | 1 | 1 | 1: 586 | 1: 591 |
| Kahramanmaraş-<br>Pazarcık'ta Meydana<br>Gelen Deprem Hk. 15 | Kahramanmaraş | 1 | 0 | 0 | 1: 659 | 1: 671 |
| Kahramanmaraş-<br>Pazarcık'ta Meydana<br>Gelen Deprem Hk. 15 | Pazarcık      | 0 | 1 | 0 | 1: 659 | 1: 671 |



|                                                       |                          |   |   |   |         |         |
|-------------------------------------------------------|--------------------------|---|---|---|---------|---------|
| Kahramanmaraş-Pazarcık'ta Meydana Gelen Deprem Hk. 15 | Earthquake               | 1 | 1 | 1 | 1: 860  | 1: 865  |
| Kahramanmaraş-Pazarcık'ta Meydana Gelen Deprem Hk. 15 | Earthquake               | 1 | 1 | 1 | 1: 860  | 1: 865  |
| Kahramanmaraş-Pazarcık'ta Meydana Gelen Deprem Hk. 15 | Shelter&meal\Sheltering  | 1 | 1 | 1 | 1: 889  | 1: 895  |
| Kahramanmaraş-Pazarcık'ta Meydana Gelen Deprem Hk. 15 | Shelter&meal\Sheltering  | 1 | 1 | 1 | 1: 889  | 1: 895  |
| Kahramanmaraş-Pazarcık'ta Meydana Gelen Deprem Hk. 15 | AFAD                     | 1 | 1 | 1 | 1: 920  | 1: 923  |
| Kahramanmaraş-Pazarcık'ta Meydana Gelen Deprem Hk. 15 | AFAD                     | 1 | 1 | 1 | 1: 920  | 1: 923  |
| Kahramanmaraş-Pazarcık'ta Meydana Gelen Deprem Hk. 15 | Shelter&meal\Tent        | 1 | 1 | 1 | 1: 936  | 1: 940  |
| Kahramanmaraş-Pazarcık'ta Meydana Gelen Deprem Hk. 15 | Shelter&meal\Tent        | 1 | 1 | 1 | 1: 936  | 1: 940  |
| Kahramanmaraş-Pazarcık'ta Meydana Gelen Deprem Hk. 15 | AFAD                     | 1 | 1 | 1 | 1: 976  | 1: 979  |
| Kahramanmaraş-Pazarcık'ta Meydana Gelen Deprem Hk. 15 | AFAD                     | 1 | 1 | 1 | 1: 976  | 1: 979  |
| Kahramanmaraş-Pazarcık'ta Meydana Gelen Deprem Hk. 15 | Response\Military        | 1 | 1 | 1 | 1: 1037 | 1: 1044 |
| Kahramanmaraş-Pazarcık'ta Meydana Gelen Deprem Hk. 15 | Response\Military        | 1 | 1 | 1 | 1: 1037 | 1: 1044 |
| Kahramanmaraş-Pazarcık'ta Meydana Gelen Deprem Hk. 15 | Response\Search&Rescue   | 1 | 1 | 1 | 1: 1182 | 1: 1195 |
| Kahramanmaraş-Pazarcık'ta Meydana Gelen Deprem Hk. 15 | Response\Search&Rescue   | 1 | 1 | 1 | 1: 1182 | 1: 1195 |
| Kahramanmaraş-Pazarcık'ta Meydana Gelen Deprem Hk. 15 | Response\Number of staff | 1 | 0 | 0 | 1: 1236 | 1: 1250 |
| Kahramanmaraş-Pazarcık'ta Meydana Gelen Deprem Hk. 15 | Response\Number          | 0 | 1 | 0 | 1: 1236 | 1: 1250 |
| Kahramanmaraş-Pazarcık'ta Meydana Gelen Deprem Hk. 15 | Disaster                 | 1 | 1 | 1 | 1: 1370 | 1: 1373 |
| Kahramanmaraş-Pazarcık'ta Meydana Gelen Deprem Hk. 15 | Disaster                 | 1 | 1 | 1 | 1: 1370 | 1: 1373 |
| Kahramanmaraş-Pazarcık'ta Meydana Gelen Deprem Hk. 15 | Disaster                 | 1 | 1 | 1 | 1: 1403 | 1: 1406 |
| Kahramanmaraş-Pazarcık'ta Meydana Gelen Deprem Hk. 15 | Disaster                 | 1 | 1 | 1 | 1: 1403 | 1: 1406 |

|                                                       |                           |   |   |   |         |         |
|-------------------------------------------------------|---------------------------|---|---|---|---------|---------|
| Kahramanmaraş-Pazarcık'ta Meydana Gelen Deprem Hk. 15 | Disaster                  | 1 | 1 | 1 | 1: 1567 | 1: 1570 |
| Kahramanmaraş-Pazarcık'ta Meydana Gelen Deprem Hk. 15 | Disaster                  | 1 | 1 | 1 | 1: 1567 | 1: 1570 |
| Kahramanmaraş-Pazarcık'ta Meydana Gelen Deprem Hk. 15 | Response\Coast guard&Navy | 1 | 1 | 1 | 1: 1690 | 1: 1703 |
| Kahramanmaraş-Pazarcık'ta Meydana Gelen Deprem Hk. 15 | Response\Coast guard&Navy | 1 | 1 | 1 | 1: 1690 | 1: 1703 |
| Kahramanmaraş-Pazarcık'ta Meydana Gelen Deprem Hk. 15 | Response\Military         | 1 | 1 | 1 | 1: 1708 | 1: 1715 |
| Kahramanmaraş-Pazarcık'ta Meydana Gelen Deprem Hk. 15 | Response\Military         | 1 | 1 | 1 | 1: 1708 | 1: 1715 |
| Kahramanmaraş-Pazarcık'ta Meydana Gelen Deprem Hk. 15 | Shelter&meal\Evacuation   | 1 | 1 | 1 | 1: 1912 | 1: 1918 |
| Kahramanmaraş-Pazarcık'ta Meydana Gelen Deprem Hk. 15 | Shelter&meal\Evacuation   | 1 | 1 | 1 | 1: 1912 | 1: 1918 |
| Kahramanmaraş-Pazarcık'ta Meydana Gelen Deprem Hk. 15 | Response\Coast guard&Navy | 1 | 1 | 1 | 1: 1929 | 1: 1944 |
| Kahramanmaraş-Pazarcık'ta Meydana Gelen Deprem Hk. 15 | Response\Coast guard&Navy | 1 | 1 | 1 | 1: 1929 | 1: 1944 |
| Kahramanmaraş-Pazarcık'ta Meydana Gelen Deprem Hk. 15 | Response\Coast guard&Navy | 1 | 1 | 1 | 1: 1972 | 1: 1985 |
| Kahramanmaraş-Pazarcık'ta Meydana Gelen Deprem Hk. 15 | Response\Coast guard&Navy | 1 | 1 | 1 | 1: 1972 | 1: 1985 |
| Kahramanmaraş-Pazarcık'ta Meydana Gelen Deprem Hk. 15 | Disaster                  | 1 | 1 | 1 | 1: 2062 | 1: 2065 |
| Kahramanmaraş-Pazarcık'ta Meydana Gelen Deprem Hk. 15 | Disaster                  | 1 | 1 | 1 | 1: 2062 | 1: 2065 |
| Kahramanmaraş-Pazarcık'ta Meydana Gelen Deprem Hk. 15 | AFAD                      | 1 | 1 | 1 | 1: 2077 | 1: 2080 |
| Kahramanmaraş-Pazarcık'ta Meydana Gelen Deprem Hk. 15 | AFAD                      | 1 | 1 | 1 | 1: 2077 | 1: 2080 |
| Kahramanmaraş-Pazarcık'ta Meydana Gelen Deprem Hk. 15 | Response\Welfare service  | 1 | 1 | 1 | 1: 2117 | 1: 2129 |
| Kahramanmaraş-Pazarcık'ta Meydana Gelen Deprem Hk. 15 | Response\Welfare service  | 1 | 1 | 1 | 1: 2117 | 1: 2129 |
| Kahramanmaraş-Pazarcık'ta Meydana Gelen Deprem Hk. 15 | Emergency                 | 1 | 1 | 1 | 1: 2205 | 1: 2214 |
| Kahramanmaraş-Pazarcık'ta Meydana Gelen Deprem Hk. 15 | Emergency                 | 1 | 1 | 1 | 1: 2205 | 1: 2214 |

|                                                              |                             |   |   |   |         |         |
|--------------------------------------------------------------|-----------------------------|---|---|---|---------|---------|
| Kahramanmaraş-<br>Pazarcık'ta Meydana<br>Gelen Deprem Hk. 15 | Disaster                    | 1 | 1 | 1 | 1: 2241 | 1: 2244 |
| Kahramanmaraş-<br>Pazarcık'ta Meydana<br>Gelen Deprem Hk. 15 | Disaster                    | 1 | 1 | 1 | 1: 2241 | 1: 2244 |
| Kahramanmaraş-<br>Pazarcık'ta Meydana<br>Gelen Deprem Hk. 15 | Shelter&meal\Sheltering     | 1 | 1 | 1 | 1: 2246 | 1: 2252 |
| Kahramanmaraş-<br>Pazarcık'ta Meydana<br>Gelen Deprem Hk. 15 | Shelter&meal\Sheltering     | 1 | 1 | 1 | 1: 2246 | 1: 2252 |
| Kahramanmaraş-<br>Pazarcık'ta Meydana<br>Gelen Deprem Hk. 15 | Earthquake                  | 1 | 1 | 1 | 1: 2261 | 1: 2266 |
| Kahramanmaraş-<br>Pazarcık'ta Meydana<br>Gelen Deprem Hk. 15 | Earthquake                  | 1 | 1 | 1 | 1: 2261 | 1: 2266 |
| Kahramanmaraş-<br>Pazarcık'ta Meydana<br>Gelen Deprem Hk. 15 | AFAD                        | 1 | 1 | 1 | 1: 2314 | 1: 2317 |
| Kahramanmaraş-<br>Pazarcık'ta Meydana<br>Gelen Deprem Hk. 15 | AFAD                        | 1 | 1 | 1 | 1: 2314 | 1: 2317 |
| Kahramanmaraş-<br>Pazarcık'ta Meydana<br>Gelen Deprem Hk. 15 | Shelter&meal\Tent           | 1 | 1 | 1 | 1: 2330 | 1: 2334 |
| Kahramanmaraş-<br>Pazarcık'ta Meydana<br>Gelen Deprem Hk. 15 | Shelter&meal\Tent           | 1 | 1 | 1 | 1: 2330 | 1: 2334 |
| Kahramanmaraş-<br>Pazarcık'ta Meydana<br>Gelen Deprem Hk. 15 | AFAD                        | 1 | 1 | 1 | 1: 2361 | 1: 2364 |
| Kahramanmaraş-<br>Pazarcık'ta Meydana<br>Gelen Deprem Hk. 15 | AFAD                        | 1 | 1 | 1 | 1: 2361 | 1: 2364 |
| Kahramanmaraş-<br>Pazarcık'ta Meydana<br>Gelen Deprem Hk. 15 | Shelter&meal\Tent           | 1 | 1 | 1 | 1: 2377 | 1: 2381 |
| Kahramanmaraş-<br>Pazarcık'ta Meydana<br>Gelen Deprem Hk. 15 | Shelter&meal\Tent           | 1 | 1 | 1 | 1: 2377 | 1: 2381 |
| Kahramanmaraş-<br>Pazarcık'ta Meydana<br>Gelen Deprem Hk. 15 | Disaster                    | 1 | 1 | 1 | 1: 2488 | 1: 2491 |
| Kahramanmaraş-<br>Pazarcık'ta Meydana<br>Gelen Deprem Hk. 15 | Disaster                    | 1 | 1 | 1 | 1: 2488 | 1: 2491 |
| Kahramanmaraş-<br>Pazarcık'ta Meydana<br>Gelen Deprem Hk. 15 | Shelter&meal\Mobile kitchen | 1 | 1 | 1 | 1: 2540 | 1: 2551 |
| Kahramanmaraş-<br>Pazarcık'ta Meydana<br>Gelen Deprem Hk. 15 | Shelter&meal\Mobile kitchen | 1 | 1 | 1 | 1: 2540 | 1: 2551 |
| Kahramanmaraş-<br>Pazarcık'ta Meydana<br>Gelen Deprem Hk. 15 | Shelter&meal\Mobile bakery  | 1 | 1 | 1 | 1: 2587 | 1: 2597 |
| Kahramanmaraş-<br>Pazarcık'ta Meydana<br>Gelen Deprem Hk. 15 | Shelter&meal\Mobile bakery  | 1 | 1 | 1 | 1: 2587 | 1: 2597 |

|                                                       |                               |   |   |   |         |         |
|-------------------------------------------------------|-------------------------------|---|---|---|---------|---------|
| Kahramanmaraş-Pazarcık'ta Meydana Gelen Deprem Hk. 15 | Response\Military             | 1 | 1 | 1 | 1: 2663 | 1: 2670 |
| Kahramanmaraş-Pazarcık'ta Meydana Gelen Deprem Hk. 15 | Response\Military             | 1 | 1 | 1 | 1: 2663 | 1: 2670 |
| Kahramanmaraş-Pazarcık'ta Meydana Gelen Deprem Hk. 15 | Shelter&meal\Mobile kitchen   | 1 | 1 | 1 | 1: 2678 | 1: 2689 |
| Kahramanmaraş-Pazarcık'ta Meydana Gelen Deprem Hk. 15 | Shelter&meal\Mobile kitchen   | 1 | 1 | 1 | 1: 2678 | 1: 2689 |
| Kahramanmaraş-Pazarcık'ta Meydana Gelen Deprem Hk. 15 | Shelter&meal\Mobile bakery    | 1 | 1 | 1 | 1: 2694 | 1: 2704 |
| Kahramanmaraş-Pazarcık'ta Meydana Gelen Deprem Hk. 15 | Shelter&meal\Mobile bakery    | 1 | 1 | 1 | 1: 2694 | 1: 2704 |
| Kahramanmaraş-Pazarcık'ta Meydana Gelen Deprem Hk. 15 | AFAD                          | 1 | 1 | 1 | 1: 2707 | 1: 2710 |
| Kahramanmaraş-Pazarcık'ta Meydana Gelen Deprem Hk. 15 | AFAD                          | 1 | 1 | 1 | 1: 2707 | 1: 2710 |
| Kahramanmaraş-Pazarcık'ta Meydana Gelen Deprem Hk. 15 | Shelter&meal\Mobile kitchen   | 1 | 1 | 1 | 1: 2770 | 1: 2781 |
| Kahramanmaraş-Pazarcık'ta Meydana Gelen Deprem Hk. 15 | Shelter&meal\Mobile kitchen   | 1 | 1 | 1 | 1: 2770 | 1: 2781 |
| Kahramanmaraş-Pazarcık'ta Meydana Gelen Deprem Hk. 15 | Disaster                      | 1 | 1 | 1 | 1: 2806 | 1: 2809 |
| Kahramanmaraş-Pazarcık'ta Meydana Gelen Deprem Hk. 15 | Disaster                      | 1 | 1 | 1 | 1: 2806 | 1: 2809 |
| Kahramanmaraş-Pazarcık'ta Meydana Gelen Deprem Hk. 15 | Shelter&meal\Hot meal         | 1 | 1 | 1 | 1: 2833 | 1: 2843 |
| Kahramanmaraş-Pazarcık'ta Meydana Gelen Deprem Hk. 15 | Shelter&meal\Hot meal         | 1 | 1 | 1 | 1: 2833 | 1: 2843 |
| Kahramanmaraş-Pazarcık'ta Meydana Gelen Deprem Hk. 15 | Disaster                      | 1 | 1 | 1 | 1: 3012 | 1: 3015 |
| Kahramanmaraş-Pazarcık'ta Meydana Gelen Deprem Hk. 15 | Disaster                      | 1 | 1 | 1 | 1: 3012 | 1: 3015 |
| Kahramanmaraş-Pazarcık'ta Meydana Gelen Deprem Hk. 15 | Response\Psychosocial support | 1 | 1 | 1 | 1: 3017 | 1: 3026 |
| Kahramanmaraş-Pazarcık'ta Meydana Gelen Deprem Hk. 15 | Response\Psychosocial support | 1 | 1 | 1 | 1: 3017 | 1: 3026 |
| Kahramanmaraş-Pazarcık'ta Meydana Gelen Deprem Hk. 15 | Response\Welfare service      | 1 | 1 | 1 | 1: 3050 | 1: 3062 |
| Kahramanmaraş-Pazarcık'ta Meydana Gelen Deprem Hk. 15 | Response\Welfare service      | 1 | 1 | 1 | 1: 3050 | 1: 3062 |

|                                                       |                               |   |   |   |         |         |
|-------------------------------------------------------|-------------------------------|---|---|---|---------|---------|
| Kahramanmaraş-Pazarcık'ta Meydana Gelen Deprem Hk. 15 | Kahramanmaraş                 | 1 | 0 | 0 | 1: 3073 | 1: 3085 |
| Kahramanmaraş-Pazarcık'ta Meydana Gelen Deprem Hk. 15 | Pazarcık                      | 0 | 1 | 0 | 1: 3073 | 1: 3085 |
| Kahramanmaraş-Pazarcık'ta Meydana Gelen Deprem Hk. 15 | Kahramanmaraş                 | 1 | 0 | 0 | 2: 17   | 2: 29   |
| Kahramanmaraş-Pazarcık'ta Meydana Gelen Deprem Hk. 15 | Pazarcık                      | 0 | 1 | 0 | 2: 17   | 2: 29   |
| Kahramanmaraş-Pazarcık'ta Meydana Gelen Deprem Hk. 15 | Earthquake                    | 1 | 1 | 1 | 2: 57   | 2: 62   |
| Kahramanmaraş-Pazarcık'ta Meydana Gelen Deprem Hk. 15 | Earthquake                    | 1 | 1 | 1 | 2: 57   | 2: 62   |
| Kahramanmaraş-Pazarcık'ta Meydana Gelen Deprem Hk. 15 | AFAD                          | 1 | 1 | 1 | 2: 98   | 2: 101  |
| Kahramanmaraş-Pazarcık'ta Meydana Gelen Deprem Hk. 15 | AFAD                          | 1 | 1 | 1 | 2: 98   | 2: 101  |
| Kahramanmaraş-Pazarcık'ta Meydana Gelen Deprem Hk. 15 | Earthquake                    | 1 | 1 | 1 | 2: 149  | 2: 154  |
| Kahramanmaraş-Pazarcık'ta Meydana Gelen Deprem Hk. 15 | Earthquake                    | 1 | 1 | 1 | 2: 149  | 2: 154  |
| Kahramanmaraş-Pazarcık'ta Meydana Gelen Deprem Hk. 15 | Disaster                      | 1 | 1 | 1 | 2: 304  | 2: 307  |
| Kahramanmaraş-Pazarcık'ta Meydana Gelen Deprem Hk. 15 | Disaster                      | 1 | 1 | 1 | 2: 304  | 2: 307  |
| Kahramanmaraş-Pazarcık'ta Meydana Gelen Deprem Hk. 15 | Coordination\Public relations | 1 | 1 | 1 | 2: 463  | 2: 468  |
| Kahramanmaraş-Pazarcık'ta Meydana Gelen Deprem Hk. 15 | Coordination\Public relations | 1 | 1 | 1 | 2: 463  | 2: 468  |
| Kahramanmaraş-Pazarcık'ta Meydana Gelen Deprem Hk. 15 | AFAD                          | 1 | 1 | 1 | 2: 503  | 2: 506  |
| Kahramanmaraş-Pazarcık'ta Meydana Gelen Deprem Hk. 15 | AFAD                          | 1 | 1 | 1 | 2: 503  | 2: 506  |
| Kahramanmaraş-Pazarcık'ta Meydana Gelen Deprem Hk. 15 | AFAD                          | 1 | 1 | 1 | 2: 561  | 2: 564  |
| Kahramanmaraş-Pazarcık'ta Meydana Gelen Deprem Hk. 15 | AFAD                          | 1 | 1 | 1 | 2: 561  | 2: 564  |
| Kahramanmaraş-Pazarcık'ta Meydana Gelen Deprem Hk. 15 | AFAD                          | 1 | 1 | 1 | 2: 678  | 2: 681  |
| Kahramanmaraş-Pazarcık'ta Meydana Gelen Deprem Hk. 15 | AFAD                          | 1 | 1 | 1 | 2: 678  | 2: 681  |

|                                                       |                                 |   |   |   |         |         |
|-------------------------------------------------------|---------------------------------|---|---|---|---------|---------|
| Kahramanmaraş-Pazarcık'ta Meydana Gelen Deprem Hk. 15 | Response\Search&Rescue          | 1 | 1 | 1 | 2: 772  | 2: 785  |
| Kahramanmaraş-Pazarcık'ta Meydana Gelen Deprem Hk. 15 | Response\Search&Rescue          | 1 | 1 | 1 | 2: 772  | 2: 785  |
| Kahramanmaraş-Pazarcık'ta Meydana Gelen Deprem Hk. 15 | Disaster                        | 1 | 1 | 1 | 2: 836  | 2: 839  |
| Kahramanmaraş-Pazarcık'ta Meydana Gelen Deprem Hk. 15 | Disaster                        | 1 | 1 | 1 | 2: 836  | 2: 839  |
| Kahramanmaraş-Pazarcık'ta Meydana Gelen Deprem Hk. 15 | AFAD                            | 1 | 1 | 1 | 2: 854  | 2: 857  |
| Kahramanmaraş-Pazarcık'ta Meydana Gelen Deprem Hk. 15 | AFAD                            | 1 | 1 | 1 | 2: 854  | 2: 857  |
| Kahramanmaraş-Pazarcık'ta Meydana Gelen Deprem Hk. 15 | Preparedness\Preparedness       | 1 | 1 | 1 | 2: 918  | 2: 928  |
| Kahramanmaraş-Pazarcık'ta Meydana Gelen Deprem Hk. 15 | Preparedness\Preparedness       | 1 | 1 | 1 | 2: 918  | 2: 928  |
| Kahramanmaraş-Pazarcık'ta Meydana Gelen Deprem Hk. 15 | Disaster                        | 1 | 1 | 1 | 2: 918  | 2: 921  |
| Kahramanmaraş-Pazarcık'ta Meydana Gelen Deprem Hk. 15 | Disaster                        | 1 | 1 | 1 | 2: 918  | 2: 921  |
| Kahramanmaraş-Pazarcık'ta Meydana Gelen Deprem Hk. 15 | Disaster                        | 1 | 1 | 1 | 2: 966  | 2: 969  |
| Kahramanmaraş-Pazarcık'ta Meydana Gelen Deprem Hk. 15 | Disaster                        | 1 | 1 | 1 | 2: 966  | 2: 969  |
| Kahramanmaraş-Pazarcık'ta Meydana Gelen Deprem Hk. 15 | Recovery\Fund drive             | 1 | 1 | 1 | 2: 1027 | 2: 1045 |
| Kahramanmaraş-Pazarcık'ta Meydana Gelen Deprem Hk. 15 | Recovery\Fund drive             | 1 | 1 | 1 | 2: 1027 | 2: 1045 |
| Kahramanmaraş-Pazarcık'ta Meydana Gelen Deprem Hk. 15 | Coordination\Social media       | 1 | 0 | 0 | 2: 1143 | 2: 1154 |
| Kahramanmaraş-Pazarcık'ta Meydana Gelen Deprem Hk. 15 | Coordination\Social media usage | 0 | 1 | 0 | 2: 1143 | 2: 1154 |
| Kahramanmaraş-Pazarcık'ta Meydana Gelen Deprem Hk. 15 | AFAD                            | 1 | 1 | 1 | 2: 1199 | 2: 1202 |
| Kahramanmaraş-Pazarcık'ta Meydana Gelen Deprem Hk. 15 | AFAD                            | 1 | 1 | 1 | 2: 1199 | 2: 1202 |
| Kahramanmaraş-Pazarcık'ta Meydana Gelen Deprem Hk. 15 | AFAD                            | 1 | 1 | 1 | 2: 1221 | 2: 1224 |
| Kahramanmaraş-Pazarcık'ta Meydana Gelen Deprem Hk. 15 | AFAD                            | 1 | 1 | 1 | 2: 1221 | 2: 1224 |

|                                                       |                                 |   |   |   |         |         |
|-------------------------------------------------------|---------------------------------|---|---|---|---------|---------|
| Kahramanmaraş-Pazarcık'ta Meydana Gelen Deprem Hk. 15 | Coordination\Information        | 1 | 1 | 1 | 2: 1266 | 2: 1277 |
| Kahramanmaraş-Pazarcık'ta Meydana Gelen Deprem Hk. 15 | Coordination\Information        | 1 | 1 | 1 | 2: 1266 | 2: 1277 |
| Kahramanmaraş-Pazarcık'ta Meydana Gelen Deprem Hk. 15 | Recovery\Peacemaking            | 1 | 1 | 1 | 2: 1282 | 2: 1291 |
| Kahramanmaraş-Pazarcık'ta Meydana Gelen Deprem Hk. 15 | Recovery\Peacemaking            | 1 | 1 | 1 | 2: 1282 | 2: 1291 |
| Kahramanmaraş-Pazarcık'ta Meydana Gelen Deprem Hk. 15 | Coordination\Social media       | 1 | 0 | 0 | 2: 1338 | 2: 1349 |
| Kahramanmaraş-Pazarcık'ta Meydana Gelen Deprem Hk. 15 | Coordination\Social media usage | 0 | 1 | 0 | 2: 1338 | 2: 1349 |
| Kahramanmaraş-Pazarcık'ta Meydana Gelen Deprem Hk. 15 | Disaster                        | 1 | 1 | 1 | 2: 1440 | 2: 1443 |
| Kahramanmaraş-Pazarcık'ta Meydana Gelen Deprem Hk. 15 | Disaster                        | 1 | 1 | 1 | 2: 1440 | 2: 1443 |
| Kahramanmaraş-Pazarcık'ta Meydana Gelen Deprem Hk. 15 | Emergency                       | 1 | 1 | 1 | 2: 1448 | 2: 1457 |
| Kahramanmaraş-Pazarcık'ta Meydana Gelen Deprem Hk. 15 | Emergency                       | 1 | 1 | 1 | 2: 1448 | 2: 1457 |
