# Supplementary material for: Disaster Management Following the Great Kahramanmaraş Earthquakes in 2023, Türkiye
Source: Copernicus journal article supplement (doi:10.5194/egusphere-2024-2538), 2024-10-07
Supplement: Supplementary file [file egusphere-2024-2538-AC2-supplement.pdf]

Dear reviewer,

We appreciate your valuable input on the study. Thank you very much!

We have revised the title as you suggested: "Critical points in the views of G7's country leaders on national agendas for SDGs and SFDRR". Also, we have made minor amendments to the abstract to align with the title, and they were highlighted in the document.

Respectfully.
